# Supplementary material for: Auto-sumoylation of the Ubc9 E2 SUMO-conjugating Enzyme Extends Cellular Lifespan
Source: Research Square preprint supplement (doi:10.21203/rs.3.rs-4016606/v1), 2024-03-21
Supplement: Supplementary file 1 [file 530c91d7bed75e8c2885db1f.xlsx]

## Sheet: BPC
No tag												WT												2kr

## Sheet: Smt3 target substrates
Protein FDR Confidence: Combined	Master	Accession	Description	Exp. q-value: Combined	Sum PEP Score	Coverage [%]	# Peptides	# PSMs	# Unique Peptides	# AAs	MW [kDa]	calc. pI	Score Sequest HT: Sequest HT	# Peptides (by Search Engine): Sequest HT	Pfam IDs	Entrez Gene ID	Gene Symbol	KEGG Pathways	Reactome Pathways	WikiPathways	# Protein Pathway Groups	Abundance Ratio: (2kr) / (Notag)	Abundance Ratio: (WT) / (Notag)	Abundance Ratio: (2kr) / (WT)	2kr/wt log2	Abundances (Grouped): 2kr	Abundances (Grouped): Notag	Abundances (Grouped): WT	Protein name	Gene name
High	Master Protein	P19097	Fatty acid synthase subunit alpha OS=Saccharomyces cerevisiae (strain ATCC 204508 / S288c) OX=559292 GN=FAS2 PE=1 SV=2	0	103.826	19	31	31	31	1887	206.8	5.44	46.11	31	Pf00109, Pf01648, Pf02801, Pf18314, Pf18325	855845	FAS2	Fatty acid biosynthesis; Metabolic pathways; Fatty acid metabolism			3		100	0.01	-6.64386			300	Fatty acid synthase subunit alpha	FAS2
High	Master Protein	P19414	Aconitate hydratase, mitochondrial OS=Saccharomyces cerevisiae (strain ATCC 204508 / S288c) OX=559292 GN=ACO1 PE=1 SV=2	0	57.249	26	16	16	16	778	85.3	8.07	26.23	16	Pf00330, Pf00694	851013	ACO1	Citrate cycle (TCA cycle); Glyoxylate and dicarboxylate metabolism; Metabolic pathways; Biosynthesis of secondary metabolites; Carbon metabolism; 2-Oxocarboxylic acid metabolism; Biosynthesis of amino acids	Citric acid cycle (TCA cycle)		8		100	0.01	-6.64386			300	Aconitate hydratase, mitochondrial	ACO1
High	Master Protein	P48570	Homocitrate synthase, cytosolic isozyme OS=Saccharomyces cerevisiae (strain ATCC 204508 / S288c) OX=559292 GN=LYS20 PE=1 SV=1	0	70.367	51	15	16	15	428	47.1	7.27	29.41	15	Pf00682	851346	LYS20	Lysine biosynthesis; Pyruvate metabolism; Metabolic pathways; Biosynthesis of secondary metabolites; 2-Oxocarboxylic acid metabolism; Biosynthesis of amino acids			6		100	0.01	-6.64386			300	Homocitrate synthase, cytosolic isozyme	LYS20
High	Master Protein	P25694	Cell division control protein 48 OS=Saccharomyces cerevisiae (strain ATCC 204508 / S288c) OX=559292 GN=CDC48 PE=1 SV=3	0	62.648	27	14	17	14	835	91.9	4.94	26.99	14	Pf00004, Pf02359, Pf02933, Pf09336, Pf17862	851431	CDC48	Protein processing in endoplasmic reticulum	Neddylation; Neutrophil degranulation; HSF1 activation; Ovarian tumor domain proteases; KEAP1-NFE2L2 pathway		6		100	0.01	-6.64386			300	Cell division control protein 48	CDC48
High	Master Protein	P00817	Inorganic pyrophosphatase OS=Saccharomyces cerevisiae (strain ATCC 204508 / S288c) OX=559292 GN=IPP1 PE=1 SV=4	0	76.421	54	13	15	13	287	32.3	5.58	30.31	13	Pf00719	852296	IPP1	Oxidative phosphorylation	Cytosolic tRNA aminoacylation; Mitochondrial tRNA aminoacylation; Pyrophosphate hydrolysis		4		100	0.01	-6.64386			300	Inorganic pyrophosphatase	IPP1
High	Master Protein	P07251	ATP synthase subunit alpha, mitochondrial OS=Saccharomyces cerevisiae (strain ATCC 204508 / S288c) OX=559292 GN=ATP1 PE=1 SV=5	0	48.728	25	13	13	13	545	58.6	9.04	23.12	13	Pf00006, Pf00306, Pf02874	852177	ATP1	Oxidative phosphorylation; Metabolic pathways			2		100	0.01	-6.64386			300	ATP synthase subunit alpha, mitochondrial	ATP1
High	Master Protein	P04456	60S ribosomal protein L25 OS=Saccharomyces cerevisiae (strain ATCC 204508 / S288c) OX=559292 GN=RPL25 PE=1 SV=4	0	47.368	63	12	14	12	142	15.7	10.11	18.98	12	Pf00276, Pf03939	853993	RPL25	Ribosome	L13a-mediated translational silencing of Ceruloplasmin expression; SRP-dependent cotranslational protein targeting to membrane; Formation of a pool of free 40S subunits; GTP hydrolysis and joining of the 60S ribosomal subunit; Nonsense Mediated Decay (NMD) independent of the Exon Junction Complex (EJC); Nonsense Mediated Decay (NMD) enhanced by the Exon Junction Complex (EJC)		7		100	0.01	-6.64386			300	60S ribosomal protein L25	RPL25
High	Master Protein	Q04894	NADP-dependent alcohol dehydrogenase 6 OS=Saccharomyces cerevisiae (strain ATCC 204508 / S288c) OX=559292 GN=ADH6 PE=1 SV=1	0	59.742	45	11	14	11	360	39.6	6.74	22.59	11	Pf00107, Pf08240	855368	ADH6	Glycolysis / Gluconeogenesis; Pentose and glucuronate interconversions; Ascorbate and aldarate metabolism; Glycerolipid metabolism; Pyruvate metabolism; Metabolic pathways; Biosynthesis of secondary metabolites; Biosynthesis of cofactors			8		100	0.01	-6.64386			300	NADP-dependent alcohol dehydrogenase 6	ADH6
High	Master Protein	P04801	Threonine--tRNA ligase, cytoplasmic OS=Saccharomyces cerevisiae (strain ATCC 204508 / S288c) OX=559292 GN=THS1 PE=1 SV=2	0	24.55	18	11	11	11	734	84.5	7.03	9.07	11	Pf00587, Pf02824, Pf03129, Pf07973	854732	THS1	Aminoacyl-tRNA biosynthesis			1		100	0.01	-6.64386			300	Threonine--tRNA ligase, cytoplasmic	THS1
High	Master Protein	P38791	Deoxyhypusine synthase OS=Saccharomyces cerevisiae (strain ATCC 204508 / S288c) OX=559292 GN=DYS1 PE=1 SV=1	0	47.817	35	10	12	10	387	42.9	5.77	24.77	10	Pf01916	856465	DYS1		Hypusine synthesis from eIF5A-lysine		1		100	0.01	-6.64386			300	Deoxyhypusine synthase	DYS1
High	Master Protein	P05694	5-methyltetrahydropteroyltriglutamate--homocysteine methyltransferase OS=Saccharomyces cerevisiae (strain ATCC 204508 / S288c) OX=559292 GN=MET6 PE=1 SV=4	0	44.996	19	10	11	10	767	85.8	6.47	17.55	10	Pf01717, Pf08267	856825	MET6	Cysteine and methionine metabolism; Selenocompound metabolism; Metabolic pathways; Biosynthesis of secondary metabolites; Biosynthesis of amino acids			5		100	0.01	-6.64386			300	5-methyltetrahydropteroyltriglutamate--homocysteine methyltransferase	MET6
High	Master Protein	P00360	Glyceraldehyde-3-phosphate dehydrogenase 1 OS=Saccharomyces cerevisiae (strain ATCC 204508 / S288c) OX=559292 GN=TDH1 PE=1 SV=3	0	192.166	70	19	49	9	332	35.7	8.28	97.98	19	Pf00044, Pf02800	853395	TDH1	Glycolysis / Gluconeogenesis; Metabolic pathways; Biosynthesis of secondary metabolites; Carbon metabolism; Biosynthesis of amino acids	Glycolysis; Gluconeogenesis		7		100	0.01	-6.64386			300	Glyceraldehyde-3-phosphate dehydrogenase 1	TDH1
High	Master Protein	P38777	Family of serine hydrolases 1 OS=Saccharomyces cerevisiae (strain ATCC 204508 / S288c) OX=559292 GN=FSH1 PE=1 SV=1	0	46.75	56	9	10	9	243	27.3	6.35	14.16	9	Pf03959	856445	FSH1				0		100	0.01	-6.64386			300	Family of serine hydrolases 1	FSH1
High	Master Protein	P06208	2-isopropylmalate synthase OS=Saccharomyces cerevisiae (strain ATCC 204508 / S288c) OX=559292 GN=LEU4 PE=1 SV=1	0	36.1	20	9	10	9	619	68.4	6.01	18.74	9	Pf00682, Pf08502	855619	LEU4	Valine, leucine and isoleucine biosynthesis; Pyruvate metabolism; Metabolic pathways; Biosynthesis of secondary metabolites; 2-Oxocarboxylic acid metabolism; Biosynthesis of amino acids			6		100	0.01	-6.64386			300	2-isopropylmalate synthase	LEU4
High	Master Protein	Q07478	ATP-dependent RNA helicase SUB2 OS=Saccharomyces cerevisiae (strain ATCC 204508 / S288c) OX=559292 GN=SUB2 PE=1 SV=1	0	47.651	32	8	9	8	446	50.3	5.52	12.36	8	Pf00270, Pf00271	851475	SUB2	Nucleocytoplasmic transport; mRNA surveillance pathway; Spliceosome	RHOBTB2 GTPase cycle		4		100	0.01	-6.64386			300	ATP-dependent RNA helicase SUB2	SUB2
High	Master Protein	P07245	C-1-tetrahydrofolate synthase, cytoplasmic OS=Saccharomyces cerevisiae (strain ATCC 204508 / S288c) OX=559292 GN=ADE3 PE=1 SV=1	0	29.046	12	8	8	8	946	102.1	6.84	11.12	8	Pf00763, Pf01268, Pf02882	853118	ADE3	One carbon pool by folate; Metabolic pathways; Biosynthesis of cofactors	Metabolism of folate and pterines		4		100	0.01	-6.64386			300	C-1-tetrahydrofolate synthase, cytoplasmic	ADE3
High	Master Protein	Q12080	Ribosome biogenesis protein NOP53 OS=Saccharomyces cerevisiae (strain ATCC 204508 / S288c) OX=559292 GN=NOP53 PE=1 SV=1	0	26.344	21	8	8	8	455	52.5	9.35	15.51	8	Pf07767	855957	NOP53				0		100	0.01	-6.64386			300	Ribosome biogenesis protein NOP53	NOP53
High	Master Protein	P53912	Uncharacterized protein YNL134C OS=Saccharomyces cerevisiae (strain ATCC 204508 / S288c) OX=559292 GN=YNL134C PE=1 SV=1	0	37.649	37	7	7	7	376	41.1	6.21	13.23	7	Pf00107	855588					0		100	0.01	-6.64386			300	Uncharacterized protein YNL134C	YNL134C
High	Master Protein	P37303	Low specificity L-threonine aldolase OS=Saccharomyces cerevisiae (strain ATCC 204508 / S288c) OX=559292 GN=GLY1 PE=1 SV=2	0	33.311	25	7	8	7	387	42.8	6.29	9.8	7	Pf01212	856665	GLY1	Glycine, serine and threonine metabolism; Metabolic pathways; Biosynthesis of secondary metabolites; Biosynthesis of amino acids			4		100	0.01	-6.64386			300	Low specificity L-threonine aldolase	GLY1
High	Master Protein	P21954	Isocitrate dehydrogenase [NADP], mitochondrial OS=Saccharomyces cerevisiae (strain ATCC 204508 / S288c) OX=559292 GN=IDP1 PE=1 SV=1	0	30.302	21	7	7	7	428	48.2	8.76	10.05	7	Pf00180	851493	IDP1	Citrate cycle (TCA cycle); Glutathione metabolism; Metabolic pathways; Biosynthesis of secondary metabolites; Carbon metabolism; 2-Oxocarboxylic acid metabolism; Biosynthesis of amino acids; Peroxisome	Neutrophil degranulation; Peroxisomal protein import; NADPH regeneration		11		100	0.01	-6.64386			300	Isocitrate dehydrogenase [NADP], mitochondrial	IDP1
High	Master Protein	P25441	DNA-directed RNA polymerase III subunit RPC4 OS=Saccharomyces cerevisiae (strain ATCC 204508 / S288c) OX=559292 GN=RPC53 PE=1 SV=2	0	24.018	24	7	7	7	422	46.6	8.63	8.99	7	Pf05132	851404	RPC53	RNA polymerase	RNA Polymerase III Transcription Initiation From Type 1 Promoter; RNA Polymerase III Transcription Initiation From Type 2 Promoter		3		100	0.01	-6.64386			300	DNA-directed RNA polymerase III subunit RPC4	RPC53
High	Master Protein	P07342	Acetolactate synthase catalytic subunit, mitochondrial OS=Saccharomyces cerevisiae (strain ATCC 204508 / S288c) OX=559292 GN=ILV2 PE=1 SV=1	0	23.625	13	7	7	7	687	74.9	8.51	17.04	7	Pf00205, Pf02775, Pf02776	855135	ILV2	Valine, leucine and isoleucine biosynthesis; Butanoate metabolism; C5-Branched dibasic acid metabolism; Pantothenate and CoA biosynthesis; Metabolic pathways; Biosynthesis of secondary metabolites; 2-Oxocarboxylic acid metabolism; Biosynthesis of amino acids			8		100	0.01	-6.64386			300	Acetolactate synthase catalytic subunit, mitochondrial	ILV2
High	Master Protein	P32527	Zuotin OS=Saccharomyces cerevisiae (strain ATCC 204508 / S288c) OX=559292 GN=ZUO1 PE=1 SV=1	0	21.364	25	7	8	7	433	49	8.25	11.1	7	Pf00226, Pf16717	853202	ZUO1				0		100	0.01	-6.64386			300	Zuotin	ZUO1
High	Master Protein	P40217	Eukaryotic translation initiation factor 3 subunit I OS=Saccharomyces cerevisiae (strain ATCC 204508 / S288c) OX=559292 GN=TIF34 PE=1 SV=1	0	19.351	33	7	7	7	347	38.7	5.67	12.15	7	Pf00400	855177	TIF34		L13a-mediated translational silencing of Ceruloplasmin expression; Translation initiation complex formation; Formation of the ternary complex, and subsequently, the 43S complex; Ribosomal scanning and start codon recognition		4		100	0.01	-6.64386			300	Eukaryotic translation initiation factor 3 subunit I	TIF34
High	Master Protein	P27692	Transcription elongation factor SPT5 OS=Saccharomyces cerevisiae (strain ATCC 204508 / S288c) OX=559292 GN=SPT5 PE=1 SV=1	0	16.868	9	7	7	7	1063	115.6	5.25	2.59	7	Pf03439, Pf11942, Pf12815	854999	SPT5	Viral life cycle	Formation of the Early Elongation Complex; RNA Polymerase II Pre-transcription Events; TP53 Regulates Transcription of DNA Repair Genes; mRNA Capping; RNA Pol II CTD phosphorylation and interaction with CE		6		100	0.01	-6.64386			300	Transcription elongation factor SPT5	SPT5
High	Master Protein	P17555	Adenylyl cyclase-associated protein OS=Saccharomyces cerevisiae (strain ATCC 204508 / S288c) OX=559292 GN=SRV2 PE=1 SV=1	0	15.696	21	7	7	7	526	57.5	5.64	7.63	7	Pf01213, Pf08603	855584	SRV2		Neutrophil degranulation		1		100	0.01	-6.64386			300	Adenylyl cyclase-associated protein	SRV2
High	Master Protein	Q03218	Mitochondrial metal transporter 1 OS=Saccharomyces cerevisiae (strain ATCC 204508 / S288c) OX=559292 GN=MMT1 PE=1 SV=1	0	38.477	10	6	7	6	510	56.2	7.09	19.1	6	Pf01545	855215	MMT1				0		100	0.01	-6.64386			300	Mitochondrial metal transporter 1	MMT1
High	Master Protein	P38174	Methionine aminopeptidase 2 OS=Saccharomyces cerevisiae (strain ATCC 204508 / S288c) OX=559292 GN=MAP2 PE=1 SV=4	0	23.024	17	6	6	6	421	47.5	6.24	11.89	6	Pf00557	852187	MAP2		Inactivation, recovery and regulation of the phototransduction cascade		1		100	0.01	-6.64386			300	Methionine aminopeptidase 2	MAP2
High	Master Protein	P15624	Phenylalanine--tRNA ligase beta subunit OS=Saccharomyces cerevisiae (strain ATCC 204508 / S288c) OX=559292 GN=FRS1 PE=1 SV=3	0	17.05	15	6	6	6	595	67.3	5.78	5.82	6	Pf03483, Pf03484, Pf17759, Pf18262	850749	FRS1	Aminoacyl-tRNA biosynthesis			1		100	0.01	-6.64386			300	Phenylalanine--tRNA ligase beta subunit	FRS1
High	Master Protein	P43616	Cys-Gly metallodipeptidase DUG1 OS=Saccharomyces cerevisiae (strain ATCC 204508 / S288c) OX=559292 GN=DUG1 PE=1 SV=1	0	16.493	17	6	6	6	481	52.8	5.67	6.06	6	Pf01546, Pf07687	850605	DUG1	Glutathione metabolism; Metabolic pathways	Paracetamol ADME; Glutathione synthesis and recycling		4		100	0.01	-6.64386			300	Cys-Gly metallodipeptidase DUG1	DUG1
High	Master Protein	P13188	Glutamine--tRNA ligase OS=Saccharomyces cerevisiae (strain ATCC 204508 / S288c) OX=559292 GN=GLN4 PE=1 SV=2	0	12.084	10	6	6	6	809	93.1	8.41	0	6	Pf00749, Pf03950, Pf04557, Pf04558	854339	GLN4	Aminoacyl-tRNA biosynthesis; Metabolic pathways			2		100	0.01	-6.64386			300	Glutamine--tRNA ligase	GLN4
High	Master Protein	P11076	ADP-ribosylation factor 1 OS=Saccharomyces cerevisiae (strain ATCC 204508 / S288c) OX=559292 GN=ARF1 PE=1 SV=3	0	56.893	57	12	16	5	181	20.5	7.34	28.72	12	Pf00025	851335	ARF1	Endocytosis	COPI-mediated anterograde transport; COPI-dependent Golgi-to-ER retrograde traffic; Synthesis of PIPs at the Golgi membrane; trans-Golgi Network Vesicle Budding; VxPx cargo-targeting to cilium; Intra-Golgi traffic		7	1.868	0.91	2.054	1.03844	132	40	128	ADP-ribosylation factor 1	ARF1
High	Master Protein	P53958	Protein BOP3 OS=Saccharomyces cerevisiae (strain ATCC 204508 / S288c) OX=559292 GN=BOP3 PE=1 SV=1	0	56.397	23	5	8	5	396	43.7	9.72	25.88	5	Pf10846	855686	BOP3				0		100	0.01	-6.64386			300	Protein BOP3	BOP3
High	Master Protein	Q02642	Nascent polypeptide-associated complex subunit beta-1 OS=Saccharomyces cerevisiae (strain ATCC 204508 / S288c) OX=559292 GN=EGD1 PE=1 SV=2	0	30.3	51	5	6	5	157	17	6.55	13.14	5	Pf01849	856070	EGD1				0		100	0.01	-6.64386			300	Nascent polypeptide-associated complex subunit beta-1	EGD1
High	Master Protein	P14164	ARS-binding factor 1 OS=Saccharomyces cerevisiae (strain ATCC 204508 / S288c) OX=559292 GN=ABF1 PE=1 SV=4	0	24.837	11	5	5	5	731	81.7	5.07	11.56	5	Pf04684	853748	ABF1				0		100	0.01	-6.64386			300	ARS-binding factor 1	ABF1
High	Master Protein	P15992	Heat shock protein 26 OS=Saccharomyces cerevisiae (strain ATCC 204508 / S288c) OX=559292 GN=HSP26 PE=1 SV=3	0	24.26	36	5	5	5	214	23.9	5.53	11.35	5	Pf00011	852364	HSP26	Protein processing in endoplasmic reticulum			1		100	0.01	-6.64386			300	Heat shock protein 26	HSP26
High	Master Protein	P12695	Dihydrolipoyllysine-residue acetyltransferase component of pyruvate dehydrogenase complex, mitochondrial OS=Saccharomyces cerevisiae (strain ATCC 204508 / S288c) OX=559292 GN=LAT1 PE=1 SV=1	0	21.1	13	5	6	5	482	51.8	7.8	7.64	5	Pf00198, Pf00364, Pf02817	855653	LAT1	Glycolysis / Gluconeogenesis; Citrate cycle (TCA cycle); Pyruvate metabolism; Metabolic pathways; Biosynthesis of secondary metabolites; Carbon metabolism	Pyruvate metabolism; Glyoxylate metabolism and glycine degradation		8		100	0.01	-6.64386			300	Dihydrolipoyllysine-residue acetyltransferase component of pyruvate dehydrogenase complex, mitochondrial	LAT1
High	Master Protein	P39676	Flavohemoprotein OS=Saccharomyces cerevisiae (strain ATCC 204508 / S288c) OX=559292 GN=YHB1 PE=1 SV=2	0	19.111	18	5	5	5	399	44.6	6.28	7.94	5	Pf00042, Pf00970	853149	YHB1				0		100	0.01	-6.64386			300	Flavohemoprotein	YHB1
High	Master Protein	P31412	V-type proton ATPase subunit C OS=Saccharomyces cerevisiae (strain ATCC 204508 / S288c) OX=559292 GN=VMA5 PE=1 SV=4	0	17.483	17	5	5	5	392	44.2	6.67	8.85	5	Pf03223	853782	VMA5	Oxidative phosphorylation; Metabolic pathways; Phagosome	ROS and RNS production in phagocytes; Insulin receptor recycling; Transferrin endocytosis and recycling; Amino acids regulate mTORC1		7		100	0.01	-6.64386			300	V-type proton ATPase subunit C	VMA5
High	Master Protein	Q04344	Adenosine 5'-monophosphoramidase HNT1 OS=Saccharomyces cerevisiae (strain ATCC 204508 / S288c) OX=559292 GN=HNT1 PE=1 SV=2	0	17.414	43	5	5	5	158	17.7	6.95	4.47	5	Pf01230	851432	HNT1				0		100	0.01	-6.64386			300	Adenosine 5'-monophosphoramidase HNT1	HNT1
High	Master Protein	P09938	Ribonucleoside-diphosphate reductase small chain 1 OS=Saccharomyces cerevisiae (strain ATCC 204508 / S288c) OX=559292 GN=RNR2 PE=1 SV=2	0	17.084	15	5	5	5	399	46.1	5.25	6.68	5	Pf00268	853427	RNR2	Purine metabolism; Pyrimidine metabolism; Glutathione metabolism; Metabolic pathways; Nucleotide metabolism			5		100	0.01	-6.64386			300	Ribonucleoside-diphosphate reductase small chain 1	RNR2
High	Master Protein	Q06252	Uncharacterized protein YLR179C OS=Saccharomyces cerevisiae (strain ATCC 204508 / S288c) OX=559292 GN=YLR179C PE=1 SV=1	0	16.93	37	5	5	5	201	22.1	4.94	5.38	5	Pf01161	850876					0		100	0.01	-6.64386			300	Uncharacterized protein YLR179C	YLR179C
High	Master Protein	P43588	Ubiquitin carboxyl-terminal hydrolase RPN11 OS=Saccharomyces cerevisiae (strain ATCC 204508 / S288c) OX=559292 GN=RPN11 PE=1 SV=1	0	16.516	20	5	5	5	306	34.4	6.19	6.9	5	Pf01398, Pf13012	850554	RPN11	Proteasome	Neutrophil degranulation; Cross-presentation of soluble exogenous antigens (endosomes); TNFR2 non-canonical NF-kB pathway; Ub-specific processing proteases		5		100	0.01	-6.64386			300	Ubiquitin carboxyl-terminal hydrolase RPN11	RPN11
High	Master Protein	P40495	Homoisocitrate dehydrogenase, mitochondrial OS=Saccharomyces cerevisiae (strain ATCC 204508 / S288c) OX=559292 GN=LYS12 PE=1 SV=1	0	16.222	18	5	5	5	371	40	8.02	7.59	5	Pf00180	854714	LYS12	Lysine biosynthesis; Metabolic pathways; Biosynthesis of secondary metabolites; 2-Oxocarboxylic acid metabolism; Biosynthesis of amino acids			5		100	0.01	-6.64386			300	Homoisocitrate dehydrogenase, mitochondrial	LYS12
High	Master Protein	P40010	Nuclear GTP-binding protein NUG1 OS=Saccharomyces cerevisiae (strain ATCC 204508 / S288c) OX=559292 GN=NUG1 PE=1 SV=1	0	14.835	11	5	5	5	520	57.7	8.88	7.81	5	Pf01926, Pf08701	856723	NUG1	Ribosome biogenesis in eukaryotes	Major pathway of rRNA processing in the nucleolus and cytosol		2				#VALUE!				Nuclear GTP-binding protein NUG1	NUG1
High	Master Protein	P53691	Peptidyl-prolyl cis-trans isomerase CPR6 OS=Saccharomyces cerevisiae (strain ATCC 204508 / S288c) OX=559292 GN=CPR6 PE=1 SV=1	0	14.199	18	5	5	5	371	42	6.16	6.24	5	Pf00160	850914	CPR6		Dual incision in TC-NER; Gap-filling DNA repair synthesis and ligation in TC-NER; Neutrophil degranulation		3		100	0.01	-6.64386			300	Peptidyl-prolyl cis-trans isomerase CPR6	CPR6
High	Master Protein	P06103	Eukaryotic translation initiation factor 3 subunit B OS=Saccharomyces cerevisiae (strain ATCC 204508 / S288c) OX=559292 GN=PRT1 PE=1 SV=1	0	12.247	8	5	5	5	763	88.1	6.01	2.47	5	Pf00076, Pf08662	854543	PRT1		L13a-mediated translational silencing of Ceruloplasmin expression; Translation initiation complex formation; Formation of the ternary complex, and subsequently, the 43S complex; Ribosomal scanning and start codon recognition		4		100	0.01	-6.64386			300	Eukaryotic translation initiation factor 3 subunit B	PRT1
High	Master Protein	Q08970	Mitochondrial metal transporter 2 OS=Saccharomyces cerevisiae (strain ATCC 204508 / S288c) OX=559292 GN=MMT2 PE=3 SV=2	0	11.826	15	5	5	5	484	52.4	7.64	0	5	Pf01545	855877	MMT2				0		100	0.01	-6.64386			300	Mitochondrial metal transporter 2	MMT2
High	Master Protein	P00815	Histidine biosynthesis trifunctional protein OS=Saccharomyces cerevisiae (strain ATCC 204508 / S288c) OX=559292 GN=HIS4 PE=1 SV=3	0	10.872	10	5	5	5	799	87.7	5.29	2.37	5	Pf00815, Pf01502, Pf01503	850327	HIS4	Histidine metabolism; Metabolic pathways; Biosynthesis of secondary metabolites; Biosynthesis of amino acids			4		100	0.01	-6.64386			300	Histidine biosynthesis trifunctional protein	HIS4
High	Master Protein	P32565	26S proteasome regulatory subunit RPN2 OS=Saccharomyces cerevisiae (strain ATCC 204508 / S288c) OX=559292 GN=RPN2 PE=1 SV=4	0	10.484	7	5	5	5	945	104.2	6.18	1.71	5	Pf01851, Pf13646, Pf18004	854735	RPN2	Proteasome	Neutrophil degranulation; Cross-presentation of soluble exogenous antigens (endosomes); TNFR2 non-canonical NF-kB pathway; Ub-specific processing proteases	Proteasome degradation	6				#VALUE!				26S proteasome regulatory subunit RPN2	RPN2
High	Master Protein	P00498	ATP phosphoribosyltransferase OS=Saccharomyces cerevisiae (strain ATCC 204508 / S288c) OX=559292 GN=HIS1 PE=1 SV=1	0	9.859	21	5	5	5	297	32.2	6.15	0	5	Pf01634, Pf08029	856782	HIS1	Histidine metabolism; Metabolic pathways; Biosynthesis of secondary metabolites; Biosynthesis of amino acids			4		100	0.01	-6.64386			300	ATP phosphoribosyltransferase	HIS1
High	Master Protein	P15625	Phenylalanine--tRNA ligase alpha subunit OS=Saccharomyces cerevisiae (strain ATCC 204508 / S288c) OX=559292 GN=FRS2 PE=1 SV=3	0	8.725	18	5	5	5	503	57.5	5.78	1.95	5	Pf01409, Pf18553, Pf18554	850522	FRS2	Aminoacyl-tRNA biosynthesis			1		100	0.01	-6.64386			300	Phenylalanine--tRNA ligase alpha subunit	FRS2
High	Master Protein	P05759	Ubiquitin-40S ribosomal protein S31 OS=Saccharomyces cerevisiae (strain ATCC 204508 / S288c) OX=559292 GN=RPS31 PE=1 SV=3	0	34.573	28	6	7	4	152	17.2	9.86	15.07	6	Pf00240, Pf01599	850864	RPS31	Ribosome; Ubiquitin mediated proteolysis			2		100	0.01	-6.64386			300	Ubiquitin-40S ribosomal protein S31	RPS31
High	Master Protein	P41920	Ran-specific GTPase-activating protein 1 OS=Saccharomyces cerevisiae (strain ATCC 204508 / S288c) OX=559292 GN=YRB1 PE=1 SV=1	0	20.383	27	4	5	4	201	22.9	6.1	5.02	4	Pf00638	851565	YRB1				0		100	0.01	-6.64386			300	Ran-specific GTPase-activating protein 1	YRB1
High	Master Protein	P53852	Cysteine--tRNA ligase OS=Saccharomyces cerevisiae (strain ATCC 204508 / S288c) OX=559292 GN=YNL247W PE=1 SV=1	0	19.293	6	4	4	4	767	87.5	6.86	10.25	4	Pf01406	855474		Aminoacyl-tRNA biosynthesis			1		100	0.01	-6.64386			300	Cysteine--tRNA ligase	YNL247W
High	Master Protein	P39730	Eukaryotic translation initiation factor 5B OS=Saccharomyces cerevisiae (strain ATCC 204508 / S288c) OX=559292 GN=FUN12 PE=1 SV=2	0	17.723	6	4	4	4	1002	112.2	5.76	6.23	4	Pf00009, Pf03144, Pf11987	851196	FUN12		GTP hydrolysis and joining of the 60S ribosomal subunit		1		100	0.01	-6.64386			300	Eukaryotic translation initiation factor 5B	FUN12
High	Master Protein	P00958	Methionine--tRNA ligase, cytoplasmic OS=Saccharomyces cerevisiae (strain ATCC 204508 / S288c) OX=559292 GN=MES1 PE=1 SV=4	0	16.642	7	4	4	4	751	85.6	6.61	5.25	4	Pf09334, Pf09635, Pf19303	853181	MES1	Selenocompound metabolism; Aminoacyl-tRNA biosynthesis; Metabolic pathways			3		100	0.01	-6.64386			300	Methionine--tRNA ligase, cytoplasmic	MES1
High	Master Protein	P38858	6-phosphogluconolactonase 3 OS=Saccharomyces cerevisiae (strain ATCC 204508 / S288c) OX=559292 GN=SOL3 PE=1 SV=2	0	13.97	15	4	4	4	249	27.8	5.5	5.4	4	Pf01182	856568	SOL3	Pentose phosphate pathway; Metabolic pathways; Biosynthesis of secondary metabolites; Carbon metabolism	Pentose phosphate pathway		5		100	0.01	-6.64386			300	6-phosphogluconolactonase 3	SOL3
High	Master Protein	Q12314	Protein arginine N-methyltransferase SFM1 OS=Saccharomyces cerevisiae (strain ATCC 204508 / S288c) OX=559292 GN=SFM1 PE=1 SV=1	0	13.958	27	4	4	4	213	24.7	5.07	2.66	4	Pf04252	854186	SFM1				0		100	0.01	-6.64386			300	Protein arginine N-methyltransferase SFM1	SFM1
High	Master Protein	Q05911	Adenylosuccinate lyase OS=Saccharomyces cerevisiae (strain ATCC 204508 / S288c) OX=559292 GN=ADE13 PE=1 SV=1	0	13.814	12	4	5	4	482	54.5	6.43	4.23	4	Pf00206, Pf10397	851073	ADE13	Purine metabolism; Alanine, aspartate and glutamate metabolism; Metabolic pathways; Biosynthesis of secondary metabolites; Nucleotide metabolism; Biosynthesis of cofactors	Purine ribonucleoside monophosphate biosynthesis	Nucleotide metabolism	8		100	0.01	-6.64386			300	Adenylosuccinate lyase	ADE13
High	Master Protein	P41338	Acetyl-CoA acetyltransferase OS=Saccharomyces cerevisiae (strain ATCC 204508 / S288c) OX=559292 GN=ERG10 PE=1 SV=3	0	13.641	16	4	4	4	398	41.7	7.39	7.24	4	Pf00108, Pf02803	856079	ERG10	Fatty acid degradation; Valine, leucine and isoleucine degradation; Lysine degradation; Tryptophan metabolism; Pyruvate metabolism; Glyoxylate and dicarboxylate metabolism; Butanoate metabolism; Terpenoid backbone biosynthesis; Metabolic pathways; Biosynthesis of secondary metabolites; Carbon metabolism; Fatty acid metabolism			12		100	0.01	-6.64386			300	Acetyl-CoA acetyltransferase	ERG10
High	Master Protein	P29547	Elongation factor 1-gamma 1 OS=Saccharomyces cerevisiae (strain ATCC 204508 / S288c) OX=559292 GN=CAM1 PE=1 SV=2	0	13.575	18	6	6	4	415	47.1	8.38	2.21	6	Pf00043, Pf00647, Pf02798	856059	CAM1		Eukaryotic Translation Elongation		1				#VALUE!				Elongation factor 1-gamma 1	CAM1
High	Master Protein	P32457	Cell division control protein 3 OS=Saccharomyces cerevisiae (strain ATCC 204508 / S288c) OX=559292 GN=CDC3 PE=1 SV=3	0	12.516	11	4	5	4	520	60	5.48	1.74	4	Pf00735	851024	CDC3				0		100	0.01	-6.64386			300	Cell division control protein 3	CDC3
High	Master Protein	P18562	Uracil phosphoribosyltransferase OS=Saccharomyces cerevisiae (strain ATCC 204508 / S288c) OX=559292 GN=FUR1 PE=1 SV=2	0	11.553	23	4	4	4	216	24.6	5.74	1.91	4	Pf14681	856529	FUR1	Pyrimidine metabolism; Metabolic pathways; Nucleotide metabolism			3		100	0.01	-6.64386			300	Uracil phosphoribosyltransferase	FUR1
High	Master Protein	P40531	Protein GVP36 OS=Saccharomyces cerevisiae (strain ATCC 204508 / S288c) OX=559292 GN=GVP36 PE=1 SV=1	0	8.177	22	4	4	4	326	36.6	4.97	0	4	Pf10455	854770	GVP36				0				#VALUE!				Protein GVP36	GVP36
High	Master Protein	P08524	Farnesyl pyrophosphate synthase OS=Saccharomyces cerevisiae (strain ATCC 204508 / S288c) OX=559292 GN=ERG20 PE=1 SV=2	0	6.996	13	4	4	4	352	40.5	5.47	1.79	4	Pf00348	853272	ERG20	Terpenoid backbone biosynthesis; Metabolic pathways; Biosynthesis of secondary metabolites	Cholesterol biosynthesis	Cholesterol biosynthesis	5		100	0.01	-6.64386			300	Farnesyl pyrophosphate synthase	ERG20
High	Master Protein	P17076	60S ribosomal protein L8-A OS=Saccharomyces cerevisiae (strain ATCC 204508 / S288c) OX=559292 GN=RPL8A PE=1 SV=4	0	130.741	71	20	32	3	256	28.1	10.04	86.63	20	Pf01248	856352	RPL8A	Ribosome			1		100	0.01	-6.64386			300	60S ribosomal protein L8-A	RPL8A
High	Master Protein	Q03964	Transposon Ty1-DR2 Gag polyprotein OS=Saccharomyces cerevisiae (strain ATCC 204508 / S288c) OX=559292 GN=TY1A-DR2 PE=3 SV=1	0	23.008	18	6	8	3	440	49.4	8.35	12.09	6	Pf01021	851750	TY1A-DR2				0				#VALUE!				Transposon Ty1-DR2 Gag polyprotein	TY1A-DR2
High	Master Protein	Q03048	Cofilin OS=Saccharomyces cerevisiae (strain ATCC 204508 / S288c) OX=559292 GN=COF1 PE=1 SV=1	0	20.39	29	3	3	3	143	15.9	5.2	9.51	3	Pf00241	850676	COF1				0		100	0.01	-6.64386			300	Cofilin	COF1
High	Master Protein	P50109	Protein PSP2 OS=Saccharomyces cerevisiae (strain ATCC 204508 / S288c) OX=559292 GN=PSP2 PE=1 SV=2	0	17.466	8	3	3	3	593	65.5	8.73	7.59	3		854991	PSP2		Major pathway of rRNA processing in the nucleolus and cytosol		1		100	0.01	-6.64386			300	Protein PSP2	PSP2
High	Master Protein	P17423	Homoserine kinase OS=Saccharomyces cerevisiae (strain ATCC 204508 / S288c) OX=559292 GN=THR1 PE=1 SV=4	0	16.939	16	3	3	3	357	38.7	5.41	6.96	3	Pf00288	856420	THR1	Glycine, serine and threonine metabolism; Metabolic pathways; Biosynthesis of secondary metabolites; Biosynthesis of amino acids			4		100	0.01	-6.64386			300	Homoserine kinase	THR1
High	Master Protein	P25087	Sterol 24-C-methyltransferase ERG6 OS=Saccharomyces cerevisiae (strain ATCC 204508 / S288c) OX=559292 GN=ERG6 PE=1 SV=4	0	14.969	10	3	4	3	383	43.4	5.77	8.75	3	Pf08241, Pf08498	855003	ERG6	Steroid biosynthesis; Metabolic pathways; Biosynthesis of secondary metabolites			3		100	0.01	-6.64386			300	Sterol 24-C-methyltransferase ERG6	ERG6
High	Master Protein	P25374	Cysteine desulfurase, mitochondrial OS=Saccharomyces cerevisiae (strain ATCC 204508 / S288c) OX=559292 GN=NFS1 PE=1 SV=2	0	14.87	8	3	3	3	497	54.4	8.19	8.79	3	Pf00266	850343	NFS1	Thiamine metabolism; Metabolic pathways; Biosynthesis of cofactors; Sulfur relay system	Mitochondrial iron-sulfur cluster biogenesis; Molybdenum cofactor biosynthesis		6		100	0.01	-6.64386			300	Cysteine desulfurase, mitochondrial	NFS1
High	Master Protein	P25293	Nucleosome assembly protein OS=Saccharomyces cerevisiae (strain ATCC 204508 / S288c) OX=559292 GN=NAP1 PE=1 SV=2	0	14.816	14	3	3	3	417	47.9	4.34	3.88	3	Pf00956	853922	NAP1				0		100	0.01	-6.64386			300	Nucleosome assembly protein	NAP1
High	Master Protein	P02557	Tubulin beta chain OS=Saccharomyces cerevisiae (strain ATCC 204508 / S288c) OX=559292 GN=TUB2 PE=1 SV=2	0	14.18	11	3	3	3	457	50.9	4.75	5.15	3	Pf00091, Pf03953	850506	TUB2	Phagosome	Neutrophil degranulation; Cilium Assembly; Sealing of the nuclear envelope (NE) by ESCRT-III		4		100	0.01	-6.64386			300	Tubulin beta chain	TUB2
High	Master Protein	P53598	Succinate--CoA ligase [ADP-forming] subunit alpha, mitochondrial OS=Saccharomyces cerevisiae (strain ATCC 204508 / S288c) OX=559292 GN=LSC1 PE=1 SV=1	0	14.176	12	3	3	3	329	35	8.46	5.83	3	Pf00549, Pf02629	854310	LSC1	Citrate cycle (TCA cycle); Propanoate metabolism; Metabolic pathways; Biosynthesis of secondary metabolites; Carbon metabolism	Citric acid cycle (TCA cycle)		6		100	0.01	-6.64386			300	Succinate--CoA ligase [ADP-forming] subunit alpha, mitochondrial	LSC1
High	Master Protein	P39935	Eukaryotic initiation factor 4F subunit p150 OS=Saccharomyces cerevisiae (strain ATCC 204508 / S288c) OX=559292 GN=TIF4631 PE=1 SV=2	0	13.25	5	3	3	3	952	107	6.04	4.97	3	Pf02854, Pf12152	853071	TIF4631		L13a-mediated translational silencing of Ceruloplasmin expression; Nonsense Mediated Decay (NMD) independent of the Exon Junction Complex (EJC); Nonsense Mediated Decay (NMD) enhanced by the Exon Junction Complex (EJC); Translation initiation complex formation; Ribosomal scanning and start codon recognition; mTORC1-mediated signalling; Activation of the mRNA upon binding of the cap-binding comple…		7		100	0.01	-6.64386			300	Eukaryotic initiation factor 4F subunit p150	TIF4631
High	Master Protein	P39015	Suppressor protein STM1 OS=Saccharomyces cerevisiae (strain ATCC 204508 / S288c) OX=559292 GN=STM1 PE=1 SV=3	0	13.091	15	3	3	3	273	30	9.66	7.44	3	Pf04774, Pf09598	850843	STM1		Platelet degranulation		1				#VALUE!				Suppressor protein STM1	STM1
High	Master Protein	P32377	Diphosphomevalonate decarboxylase OS=Saccharomyces cerevisiae (strain ATCC 204508 / S288c) OX=559292 GN=MVD1 PE=1 SV=2	0	12.923	9	3	3	3	396	44.1	5.76	6.2	3	Pf00288, Pf18376	855779	MVD1	Terpenoid backbone biosynthesis; Metabolic pathways; Biosynthesis of secondary metabolites	Cholesterol biosynthesis; Synthesis of Dolichyl-phosphate	Cholesterol biosynthesis	6		100	0.01	-6.64386			300	Diphosphomevalonate decarboxylase	MVD1
High	Master Protein	P54780	60S ribosomal protein L15-B OS=Saccharomyces cerevisiae (strain ATCC 204508 / S288c) OX=559292 GN=RPL15B PE=1 SV=2	0	12.79	17	3	3	3	204	24.4	11.39	7.75	3	Pf00827	855150	RPL15B	Ribosome	L13a-mediated translational silencing of Ceruloplasmin expression; SRP-dependent cotranslational protein targeting to membrane; Formation of a pool of free 40S subunits; GTP hydrolysis and joining of the 60S ribosomal subunit; Nonsense Mediated Decay (NMD) independent of the Exon Junction Complex (EJC); Nonsense Mediated Decay (NMD) enhanced by the Exon Junction Complex (EJC)		7		100	0.01	-6.64386			300	60S ribosomal protein L15-B	RPL15B
High	Master Protein	P05453	Eukaryotic peptide chain release factor GTP-binding subunit OS=Saccharomyces cerevisiae (strain ATCC 204508 / S288c) OX=559292 GN=SUP35 PE=1 SV=1	0	12.768	7	3	3	3	685	76.5	7.01	5.58	3	Pf00009, Pf03143, Pf03144	851752	SUP35	mRNA surveillance pathway	Nonsense Mediated Decay (NMD) independent of the Exon Junction Complex (EJC); Nonsense Mediated Decay (NMD) enhanced by the Exon Junction Complex (EJC); Eukaryotic Translation Termination		4				#VALUE!				Eukaryotic peptide chain release factor GTP-binding subunit	SUP35
High	Master Protein	P00942	Triosephosphate isomerase OS=Saccharomyces cerevisiae (strain ATCC 204508 / S288c) OX=559292 GN=TPI1 PE=1 SV=2	0	12.543	22	3	3	3	248	26.8	6.01	3.98	3	Pf00121	851620	TPI1	Glycolysis / Gluconeogenesis; Fructose and mannose metabolism; Inositol phosphate metabolism; Metabolic pathways; Biosynthesis of secondary metabolites; Carbon metabolism; Biosynthesis of amino acids	Glycolysis; Gluconeogenesis		9		100	0.01	-6.64386			300	Triosephosphate isomerase	TPI1
High	Master Protein	Q05584	Hydroxyacylglutathione hydrolase, cytoplasmic isozyme OS=Saccharomyces cerevisiae (strain ATCC 204508 / S288c) OX=559292 GN=GLO2 PE=1 SV=1	0	12.016	12	3	4	3	274	31.3	6.19	5.7	3	Pf00753, Pf16123	851865	GLO2	Pyruvate metabolism; Metabolic pathways			2		100	0.01	-6.64386			300	Hydroxyacylglutathione hydrolase, cytoplasmic isozyme	GLO2
High	Master Protein	P23542	Aspartate aminotransferase, cytoplasmic OS=Saccharomyces cerevisiae (strain ATCC 204508 / S288c) OX=559292 GN=AAT2 PE=1 SV=3	0	11.966	10	3	3	3	418	46	8.32	5.67	3	Pf00155	850714	AAT2	Arginine biosynthesis; Alanine, aspartate and glutamate metabolism; Cysteine and methionine metabolism; Arginine and proline metabolism; Tyrosine metabolism; Phenylalanine metabolism; Phenylalanine, tyrosine and tryptophan biosynthesis; Metabolic pathways; Biosynthesis of secondary metabolites; Carbon metabolism; 2-Oxocarboxylic acid metabolism; Biosynthesis of amino acids	Gluconeogenesis; Aspartate and asparagine metabolism		14		100	0.01	-6.64386			300	Aspartate aminotransferase, cytoplasmic	AAT2
High	Master Protein	Q12447	Polyamine N-acetyltransferase 1 OS=Saccharomyces cerevisiae (strain ATCC 204508 / S288c) OX=559292 GN=PAA1 PE=1 SV=1	0	11.858	21	3	3	3	191	21.9	5.82	5.68	3	Pf00583	851643	PAA1		Serotonin and melatonin biosynthesis		1		100	0.01	-6.64386			300	Polyamine N-acetyltransferase 1	PAA1
High	Master Protein	P40825	Alanine--tRNA ligase, mitochondrial OS=Saccharomyces cerevisiae (strain ATCC 204508 / S288c) OX=559292 GN=ALA1 PE=1 SV=3	0	11.856	6	3	3	3	983	110	5.71	3.05	3	Pf01411, Pf02272, Pf07973	854513	ALA1	Aminoacyl-tRNA biosynthesis			1		100	0.01	-6.64386			300	Alanine--tRNA ligase, mitochondrial	ALA1
High	Master Protein	P34760	Peroxiredoxin TSA1 OS=Saccharomyces cerevisiae (strain ATCC 204508 / S288c) OX=559292 GN=TSA1 PE=1 SV=3	0	11.827	22	3	3	3	196	21.6	5.14	5.34	3	Pf00578, Pf10417	854980	TSA1		Neutrophil degranulation; TP53 Regulates Metabolic Genes; KEAP1-NFE2L2 pathway		3		100	0.01	-6.64386			300	Peroxiredoxin TSA1	TSA1
High	Master Protein	P40482	Protein transport protein SEC24 OS=Saccharomyces cerevisiae (strain ATCC 204508 / S288c) OX=559292 GN=SEC24 PE=1 SV=1	0	11.599	5	3	3	3	926	103.6	6.23	5.66	3	Pf00626, Pf04810, Pf04811, Pf04815, Pf08033	854697	SEC24	Protein processing in endoplasmic reticulum	COPII-mediated vesicle transport; Cargo concentration in the ER; Antigen Presentation: Folding, assembly and peptide loading of class I MHC		4				#VALUE!				Protein transport protein SEC24	SEC24
High	Master Protein	P47176	Branched-chain-amino-acid aminotransferase, cytosolic OS=Saccharomyces cerevisiae (strain ATCC 204508 / S288c) OX=559292 GN=BAT2 PE=1 SV=1	0	11.535	19	4	4	3	376	41.6	7.3	2.64	4	Pf01063	853613	BAT2	Cysteine and methionine metabolism; Valine, leucine and isoleucine degradation; Valine, leucine and isoleucine biosynthesis; Pantothenate and CoA biosynthesis; Metabolic pathways; Biosynthesis of secondary metabolites; 2-Oxocarboxylic acid metabolism; Biosynthesis of amino acids; Biosynthesis of cofactors	Branched-chain amino acid catabolism		10		100	0.01	-6.64386			300	Branched-chain-amino-acid aminotransferase, cytosolic	BAT2
High	Master Protein	P46680	Actin-interacting protein 1 OS=Saccharomyces cerevisiae (strain ATCC 204508 / S288c) OX=559292 GN=AIP1 PE=1 SV=1	0	10.833	6	3	3	3	615	67.3	5.59	4.9	3	Pf00400	855117	AIP1		Platelet degranulation		1		100	0.01	-6.64386			300	Actin-interacting protein 1	AIP1
High	Master Protein	P41807	V-type proton ATPase subunit H OS=Saccharomyces cerevisiae (strain ATCC 204508 / S288c) OX=559292 GN=VMA13 PE=1 SV=1	0	10.663	6	3	3	3	478	54.4	6.35	6.77	3	Pf03224, Pf11698	856148	VMA13	Oxidative phosphorylation; Metabolic pathways; Phagosome	ROS and RNS production in phagocytes; Insulin receptor recycling; Transferrin endocytosis and recycling; Amino acids regulate mTORC1		7				#VALUE!				V-type proton ATPase subunit H	VMA13
High	Master Protein	Q00764	Alpha,alpha-trehalose-phosphate synthase [UDP-forming] 56 kDa subunit OS=Saccharomyces cerevisiae (strain ATCC 204508 / S288c) OX=559292 GN=TPS1 PE=1 SV=2	0	10.613	9	3	3	3	495	56.1	6.09	4.13	3	Pf00982	852423	TPS1	Starch and sucrose metabolism; Metabolic pathways; Biosynthesis of secondary metabolites			3				#VALUE!				Alpha,alpha-trehalose-phosphate synthase [UDP-forming] 56 kDa subunit	TPS1
High	Master Protein	P39683	Nicotinate phosphoribosyltransferase OS=Saccharomyces cerevisiae (strain ATCC 204508 / S288c) OX=559292 GN=NPT1 PE=1 SV=3	0	10.604	9	3	3	3	429	49	6.92	5.48	3	Pf04095, Pf17767	854384	NPT1	Nicotinate and nicotinamide metabolism; Metabolic pathways; Biosynthesis of cofactors			3				#VALUE!				Nicotinate phosphoribosyltransferase	NPT1
High	Master Protein	Q05016	NADP-dependent 3-hydroxy acid dehydrogenase OS=Saccharomyces cerevisiae (strain ATCC 204508 / S288c) OX=559292 GN=YMR226C PE=1 SV=1	0	10.541	16	3	3	3	267	29.1	6.81	3.06	3	Pf00106	855266		Pyrimidine metabolism; Glycine, serine and threonine metabolism; Metabolic pathways			3		100	0.01	-6.64386			300	NADP-dependent 3-hydroxy acid dehydrogenase	YMR226C
High	Master Protein	P18239	ADP,ATP carrier protein 2 OS=Saccharomyces cerevisiae (strain ATCC 204508 / S288c) OX=559292 GN=PET9 PE=1 SV=2	0	10.082	13	4	4	3	318	34.4	9.79	4.7	4	Pf00153	852250	PET9		Mitochondrial protein import; Transport of nucleosides and free purine and pyrimidine bases across the plasma membrane		2	0.01	0.37	0.01	-6.64386		219	81	ADP,ATP carrier protein 2	PET9
High	Master Protein	Q08971	Protein PBDC1 homolog OS=Saccharomyces cerevisiae (strain ATCC 204508 / S288c) OX=559292 GN=YPL225W PE=1 SV=1	0	8.489	18	3	3	3	146	17.4	5.3	5.71	3	Pf04669	855876					0		100	0.01	-6.64386			300	Protein PBDC1 homolog	YPL225W
High	Master Protein	P38249	Eukaryotic translation initiation factor 3 subunit A OS=Saccharomyces cerevisiae (strain ATCC 204508 / S288c) OX=559292 GN=RPG1 PE=1 SV=1	0	8.378	4	3	3	3	964	110.3	6.3	4.41	3		852371	RPG1		L13a-mediated translational silencing of Ceruloplasmin expression; Translation initiation complex formation; Formation of the ternary complex, and subsequently, the 43S complex; Ribosomal scanning and start codon recognition		4				#VALUE!				Eukaryotic translation initiation factor 3 subunit A	RPG1
High	Master Protein	P53981	Polyol phosphate phosphatase PYP1 OS=Saccharomyces cerevisiae (strain ATCC 204508 / S288c) OX=559292 GN=PYP1 PE=1 SV=1	0	8.133	12	3	3	3	241	27.5	5.45	2.07	3	Pf12710	855722	PYP1				0		100	0.01	-6.64386			300	Polyol phosphate phosphatase PYP1	PYP1
High	Master Protein	P13298	Orotate phosphoribosyltransferase 1 OS=Saccharomyces cerevisiae (strain ATCC 204508 / S288c) OX=559292 GN=URA5 PE=1 SV=2	0	8.117	28	3	3	3	226	24.6	6.05	3.75	3	Pf00156	854865	URA5	Pyrimidine metabolism; Metabolic pathways; Biosynthesis of cofactors			3		100	0.01	-6.64386			300	Orotate phosphoribosyltransferase 1	URA5
High	Master Protein	P07703	DNA-directed RNA polymerases I and III subunit RPAC1 OS=Saccharomyces cerevisiae (strain ATCC 204508 / S288c) OX=559292 GN=RPC40 PE=1 SV=1	0	7.947	10	3	3	3	335	37.7	5.52	2.6	3	Pf01000, Pf01193	856226	RPC40	RNA polymerase	RNA Polymerase III Transcription Initiation From Type 1 Promoter; RNA Polymerase III Transcription Initiation From Type 2 Promoter; RNA Polymerase I Promoter Escape; RNA Polymerase I Transcription Initiation		5		100	0.01	-6.64386			300	DNA-directed RNA polymerases I and III subunit RPAC1	RPC40
High	Master Protein	Q12074	Spermidine synthase SPE3 OS=Saccharomyces cerevisiae (strain ATCC 204508 / S288c) OX=559292 GN=SPE3 PE=1 SV=1	0	7.886	13	3	3	3	293	33.3	5.53	1.77	3	Pf01564, Pf17284	856182	SPE3	Cysteine and methionine metabolism; Arginine and proline metabolism; Glutathione metabolism; Metabolic pathways	Metabolism of polyamines	Nucleotide metabolism	6		100	0.01	-6.64386			300	Spermidine synthase SPE3	SPE3
High	Master Protein	P40413	T-complex protein 1 subunit epsilon OS=Saccharomyces cerevisiae (strain ATCC 204508 / S288c) OX=559292 GN=CCT5 PE=1 SV=3	0	6.708	7	3	3	3	562	61.9	5.53	2.21	3	Pf00118	853527	CCT5		Association of TriC/CCT with target proteins during biosynthesis; Cooperation of PDCL (PhLP1) and TRiC/CCT in G-protein beta folding		2				#VALUE!				T-complex protein 1 subunit epsilon	CCT5
High	Master Protein	P28007	H/ACA ribonucleoprotein complex subunit GAR1 OS=Saccharomyces cerevisiae (strain ATCC 204508 / S288c) OX=559292 GN=GAR1 PE=1 SV=1	0	6.105	16	3	3	3	205	21.5	11.46	1.79	3	Pf04410	856489	GAR1	Ribosome biogenesis in eukaryotes			1		100	0.01	-6.64386			300	H/ACA ribonucleoprotein complex subunit GAR1	GAR1
High	Master Protein	P51862	RHO1 GDP-GTP exchange protein 2 OS=Saccharomyces cerevisiae (strain ATCC 204508 / S288c) OX=559292 GN=ROM2 PE=1 SV=1	0	6.075	3	3	3	3	1356	152.5	9.2	2.16	3	Pf00610, Pf00621, Pf00780, Pf15405	851086	ROM2	MAPK signaling pathway			1		100	0.01	-6.64386			300	RHO1 GDP-GTP exchange protein 2	ROM2
High	Master Protein	P36421	Tyrosine--tRNA ligase, cytoplasmic OS=Saccharomyces cerevisiae (strain ATCC 204508 / S288c) OX=559292 GN=TYS1 PE=1 SV=3	0	5.935	6	3	3	3	394	44	8.44	3.91	3	Pf00579	853097	TYS1	Aminoacyl-tRNA biosynthesis			1		100	0.01	-6.64386			300	Tyrosine--tRNA ligase, cytoplasmic	TYS1
High	Master Protein	P38088	Glycine--tRNA ligase 1, mitochondrial OS=Saccharomyces cerevisiae (strain ATCC 204508 / S288c) OX=559292 GN=GRS1 PE=1 SV=3	0	5.878	4	3	3	3	690	78.1	6.52	0	3	Pf03129	852418	GRS1	Aminoacyl-tRNA biosynthesis			1		100	0.01	-6.64386			300	Glycine--tRNA ligase 1, mitochondrial	GRS1
High	Master Protein	P40303	Proteasome subunit alpha type-4 OS=Saccharomyces cerevisiae (strain ATCC 204508 / S288c) OX=559292 GN=PRE6 PE=1 SV=1	0	5.759	21	3	3	3	254	28.4	7.36	0	3	Pf00227, Pf10584	854119	PRE6	Proteasome	Cross-presentation of soluble exogenous antigens (endosomes); TNFR2 non-canonical NF-kB pathway; Ub-specific processing proteases	Proteasome degradation	5		100	0.01	-6.64386			300	Proteasome subunit alpha type-4	PRE6
High	Master Protein	P39517	ATP-dependent RNA helicase DHH1 OS=Saccharomyces cerevisiae (strain ATCC 204508 / S288c) OX=559292 GN=DHH1 PE=1 SV=1	0	5.214	7	3	3	3	506	57.5	7.97	0	3	Pf00270, Pf00271	851394	DHH1	RNA degradation	mRNA decay by 5' to 3' exoribonuclease		2		100	0.01	-6.64386			300	ATP-dependent RNA helicase DHH1	DHH1
High	Master Protein	P05738	60S ribosomal protein L9-A OS=Saccharomyces cerevisiae (strain ATCC 204508 / S288c) OX=559292 GN=RPL9A PE=1 SV=2	0	56.956	55	9	15	2	191	21.6	9.73	30.33	9	Pf00347	852730	RPL9A	Ribosome			1	37.561	7.857	1.943	0.958286	107.1	14.1	178.8	60S ribosomal protein L9-A	RPL9A
High	Master Protein	P36105	60S ribosomal protein L14-A OS=Saccharomyces cerevisiae (strain ATCC 204508 / S288c) OX=559292 GN=RPL14A PE=1 SV=1	0	36.771	55	9	12	2	138	15.2	10.93	12.53	9	Pf01929	853864	RPL14A	Ribosome			1	0.334	2.556	0.148	-2.75633	6.7	51.4	241.9	60S ribosomal protein L14-A	RPL14A
High	Master Protein	P11412	Glucose-6-phosphate 1-dehydrogenase OS=Saccharomyces cerevisiae (strain ATCC 204508 / S288c) OX=559292 GN=ZWF1 PE=1 SV=4	0	20.603	6	2	3	2	505	57.5	6.3	7.74	2	Pf00479, Pf02781	855480	ZWF1	Pentose phosphate pathway; Glutathione metabolism; Metabolic pathways; Biosynthesis of secondary metabolites; Carbon metabolism	TP53 Regulates Metabolic Genes; Pentose phosphate pathway		7		100	0.01	-6.64386			300	Glucose-6-phosphate 1-dehydrogenase	ZWF1
High	Master Protein	P15731	Ubiquitin-conjugating enzyme E2 4 OS=Saccharomyces cerevisiae (strain ATCC 204508 / S288c) OX=559292 GN=UBC4 PE=1 SV=1	0	16.491	38	2	2	2	148	16.4	6.52	6.67	2	Pf00179	852376	UBC4	Ubiquitin mediated proteolysis; Protein processing in endoplasmic reticulum	Peroxisomal protein import	Proteasome degradation	4				#VALUE!				Ubiquitin-conjugating enzyme E2 4	UBC4
High	Master Protein	Q04792	Glutamate decarboxylase OS=Saccharomyces cerevisiae (strain ATCC 204508 / S288c) OX=559292 GN=GAD1 PE=1 SV=1	0	16.192	5	2	2	2	585	65.9	6.62	5.85	2	Pf00282	855291	GAD1	Alanine, aspartate and glutamate metabolism; beta-Alanine metabolism; Taurine and hypotaurine metabolism; Butanoate metabolism; Metabolic pathways; Biosynthesis of secondary metabolites			6		100	0.01	-6.64386			300	Glutamate decarboxylase	GAD1
High	Master Protein	Q12434	Rho GDP-dissociation inhibitor OS=Saccharomyces cerevisiae (strain ATCC 204508 / S288c) OX=559292 GN=RDI1 PE=1 SV=1	0	15.604	20	2	3	2	202	23.1	6.04	5.65	2	Pf02115	851420	RDI1		RAC1 GTPase cycle; RHOA GTPase cycle; CDC42 GTPase cycle; RAC3 GTPase cycle		4		100	0.01	-6.64386			300	Rho GDP-dissociation inhibitor	RDI1
High	Master Protein	P20107	Zinc/cadmium resistance protein OS=Saccharomyces cerevisiae (strain ATCC 204508 / S288c) OX=559292 GN=ZRC1 PE=1 SV=2	0	14.107	10	2	2	2	442	48.3	6.35	3.4	2	Pf01545	855284	ZRC1		Metal ion SLC transporters; Zinc efflux and compartmentalization by the SLC30 family		2		100	0.01	-6.64386			300	Zinc/cadmium resistance protein	ZRC1
High	Master Protein	P38264	SRP-independent targeting protein 3 OS=Saccharomyces cerevisiae (strain ATCC 204508 / S288c) OX=559292 GN=PHO88 PE=1 SV=1	0	13.979	15	2	3	2	188	21.1	9.19	4.41	2	Pf10032	852403	PHO88				0		100	0.01	-6.64386			300	SRP-independent targeting protein 3	PHO88
High	Master Protein	P32774	Transcription initiation factor IIA subunit 2 OS=Saccharomyces cerevisiae (strain ATCC 204508 / S288c) OX=559292 GN=TOA2 PE=1 SV=1	0	13.514	16	2	3	2	122	13.5	5.1	7.92	2	Pf02268, Pf02751	853807	TOA2	Basal transcription factors	RNA Polymerase II Pre-transcription Events; RNA polymerase II transcribes snRNA genes; RNA Polymerase II Promoter Escape; RNA Polymerase II Transcription Pre-Initiation And Promoter Opening; RNA Polymerase II Transcription Initiation; Estrogen-dependent gene expression	Eukaryotic transcription initiation	9		100	0.01	-6.64386			300	Transcription initiation factor IIA subunit 2	TOA2
High	Master Protein	Q99288	Broad-range acid phosphatase DET1 OS=Saccharomyces cerevisiae (strain ATCC 204508 / S288c) OX=559292 GN=DET1 PE=1 SV=1	0	11.788	10	2	2	2	334	39.1	7.34	6.51	2	Pf00300	851621	DET1				0				#VALUE!				Broad-range acid phosphatase DET1	DET1
High	Master Protein	P02992	Elongation factor Tu, mitochondrial OS=Saccharomyces cerevisiae (strain ATCC 204508 / S288c) OX=559292 GN=TUF1 PE=1 SV=1	0	11.343	8	2	2	2	437	47.9	6.65	4.5	2	Pf00009, Pf03143, Pf03144	854359	TUF1				0		100	0.01	-6.64386			300	Elongation factor Tu, mitochondrial	TUF1
High	Master Protein	P04806	Hexokinase-1 OS=Saccharomyces cerevisiae (strain ATCC 204508 / S288c) OX=559292 GN=HXK1 PE=1 SV=2	0	11.29	10	4	4	2	485	53.7	5.45	8.3	4	Pf00349, Pf03727	850614	HXK1	Glycolysis / Gluconeogenesis; Fructose and mannose metabolism; Galactose metabolism; Starch and sucrose metabolism; Amino sugar and nucleotide sugar metabolism; Metabolic pathways; Biosynthesis of secondary metabolites; Carbon metabolism; Biosynthesis of nucleotide sugars	Neutrophil degranulation; Regulation of Glucokinase by Glucokinase Regulatory Protein		12		100	0.01	-6.64386			300	Hexokinase-1	HXK1
High	Master Protein	P38115	D-arabinose dehydrogenase [NAD(P)+] heavy chain OS=Saccharomyces cerevisiae (strain ATCC 204508 / S288c) OX=559292 GN=ARA1 PE=1 SV=1	0	10.594	7	2	2	2	344	38.9	5.96	4.82	2	Pf00248	852446	ARA1	Ascorbate and aldarate metabolism; Metabolic pathways	RA biosynthesis pathway; Estrogen biosynthesis; Synthesis of bile acids and bile salts via 7alpha-hydroxycholesterol; Synthesis of bile acids and bile salts via 24-hydroxycholesterol; Synthesis of bile acids and bile salts via 27-hydroxycholesterol; Pregnenolone biosynthesis; Synthesis of Prostaglandins (PG) and Thromboxanes (TX); Fructose biosynthesis; Prednisone ADME		11		100	0.01	-6.64386			300	D-arabinose dehydrogenase [NAD(P)+] heavy chain	ARA1
High	Master Protein	P02309	Histone H4 OS=Saccharomyces cerevisiae (strain ATCC 204508 / S288c) OX=559292 GN=HHF2 PE=1 SV=2	0	10.531	15	2	2	2	103	11.4	11.36	6.28	2	Pf15511	852294; 855701	HHF1; HHF2		Condensation of Prophase Chromosomes; HDMs demethylate histones; HATs acetylate histones; RMTs methylate histone arginines; SUMOylation of chromatin organization proteins		5		100	0.01	-6.64386			300	Histone H4	HHF2
High	Master Protein	Q04947	Reticulon-like protein 1 OS=Saccharomyces cerevisiae (strain ATCC 204508 / S288c) OX=559292 GN=RTN1 PE=1 SV=1	0	10.4	9	2	2	2	295	32.9	8.98	5.19	2	Pf02453	851819	RTN1				0				#VALUE!				Reticulon-like protein 1	RTN1
High	Master Protein	P31376	SWR1-complex protein 3 OS=Saccharomyces cerevisiae (strain ATCC 204508 / S288c) OX=559292 GN=SWC3 PE=1 SV=2	0	9.979	9	2	2	2	625	72.5	9.16	3.44	2		851222	SWC3				0		100	0.01	-6.64386			300	SWR1-complex protein 3	SWC3
High	Master Protein	P15873	Proliferating cell nuclear antigen OS=Saccharomyces cerevisiae (strain ATCC 204508 / S288c) OX=559292 GN=POL30 PE=1 SV=1	0	9.881	8	2	2	2	258	28.9	4.59	4.88	2	Pf00705, Pf02747	852385	POL30	DNA replication; Base excision repair; Nucleotide excision repair; Mismatch repair	SUMOylation of DNA replication proteins; Mismatch repair (MMR) directed by MSH2:MSH6 (MutSalpha); Polymerase switching; Removal of the Flap Intermediate	DNA replication	10				#VALUE!				Proliferating cell nuclear antigen	POL30
High	Master Protein	P30624	Long-chain-fatty-acid--CoA ligase 1 OS=Saccharomyces cerevisiae (strain ATCC 204508 / S288c) OX=559292 GN=FAA1 PE=1 SV=1	0	9.823	5	2	2	2	700	77.8	7.62	3.35	2	Pf00501	854495	FAA1	Fatty acid biosynthesis; Fatty acid degradation; Metabolic pathways; Fatty acid metabolism; Peroxisome	Intracellular metabolism of fatty acids regulates insulin secretion; Synthesis of very long-chain fatty acyl-CoAs		7				#VALUE!				Long-chain-fatty-acid--CoA ligase 1	FAA1
High	Master Protein	Q06488	Chromatin structure-remodeling complex subunit RSC2 OS=Saccharomyces cerevisiae (strain ATCC 204508 / S288c) OX=559292 GN=RSC2 PE=1 SV=1	0	8.962	3	2	2	2	889	102.2	8.91	3.18	2	Pf00439, Pf01426	851071	RSC2				0		100	0.01	-6.64386			300	Chromatin structure-remodeling complex subunit RSC2	RSC2
High	Master Protein	P38205	Multisite-specific tRNA:(cytosine-C(5))-methyltransferase OS=Saccharomyces cerevisiae (strain ATCC 204508 / S288c) OX=559292 GN=NCL1 PE=1 SV=1	0	8.589	4	2	2	2	684	77.8	7.36	3.89	2	Pf01189	852257	NCL1				0				#VALUE!				Multisite-specific tRNA:(cytosine-C(5))-methyltransferase	NCL1
High	Master Protein	P47117	Actin-related protein 3 OS=Saccharomyces cerevisiae (strain ATCC 204508 / S288c) OX=559292 GN=ARP3 PE=1 SV=1	0	8.416	9	2	2	2	449	49.5	5.8	4.23	2	Pf00022	853528	ARP3	Autophagy; Endocytosis	Regulation of actin dynamics for phagocytic cup formation; RHO GTPases Activate WASPs and WAVEs		4		100	0.01	-6.64386			300	Actin-related protein 3	ARP3
High	Master Protein	Q12458	Putative reductase 1 OS=Saccharomyces cerevisiae (strain ATCC 204508 / S288c) OX=559292 GN=YPR1 PE=1 SV=1	0	8.2	10	2	2	2	312	34.7	7.12	2.18	2	Pf00248	851974	YPR1		Estrogen biosynthesis; Synthesis of bile acids and bile salts via 7alpha-hydroxycholesterol; Synthesis of bile acids and bile salts via 24-hydroxycholesterol; Synthesis of bile acids and bile salts via 27-hydroxycholesterol; Pregnenolone biosynthesis; Synthesis of Prostaglandins (PG) and Thromboxanes (TX); RA biosynthesis pathway; Fructose biosynthesis; Prednisone ADME		9				#VALUE!				Putative reductase 1	YPR1
High	Master Protein	P34909	General negative regulator of transcription subunit 4 OS=Saccharomyces cerevisiae (strain ATCC 204508 / S288c) OX=559292 GN=MOT2 PE=1 SV=1	0	7.972	5	2	2	2	587	65.3	8.07	4.94	2	Pf14570	856799	MOT2	RNA degradation			1		100	0.01	-6.64386			300	General negative regulator of transcription subunit 4	MOT2
High	Master Protein	P32432	Transcription factor SFP1 OS=Saccharomyces cerevisiae (strain ATCC 204508 / S288c) OX=559292 GN=SFP1 PE=1 SV=1	0	7.914	5	2	2	2	683	74.7	6.7	2.96	2		851119	SFP1				0		100	0.01	-6.64386			300	Transcription factor SFP1	SFP1
High	Master Protein	P54113	Bifunctional purine biosynthesis protein ADE16 OS=Saccharomyces cerevisiae (strain ATCC 204508 / S288c) OX=559292 GN=ADE16 PE=1 SV=1	0	7.754	8	4	4	2	591	65.2	6.55	1.64	4	Pf01808, Pf02142	850715	ADE16	Purine metabolism; One carbon pool by folate; Metabolic pathways; Biosynthesis of secondary metabolites			4		100	0.01	-6.64386			300	Bifunctional purine biosynthesis protein ADE16	ADE16
High	Master Protein	P54838	Dihydroxyacetone kinase 1 OS=Saccharomyces cerevisiae (strain ATCC 204508 / S288c) OX=559292 GN=DAK1 PE=1 SV=1	0	7.667	4	2	2	2	584	62.2	5.41	2.06	2	Pf02733, Pf02734	854932	DAK1	Fructose and mannose metabolism; Glycerolipid metabolism; Methane metabolism; Metabolic pathways; Carbon metabolism	Fructose catabolism		6		100	0.01	-6.64386			300	Dihydroxyacetone kinase 1	DAK1
High	Master Protein	P32588	Nuclear and cytoplasmic polyadenylated RNA-binding protein PUB1 OS=Saccharomyces cerevisiae (strain ATCC 204508 / S288c) OX=559292 GN=PUB1 PE=1 SV=4	0	7.598	6	2	2	2	453	50.7	5.11	2.69	2	Pf00076	855716	PUB1				0		100	0.01	-6.64386			300	Nuclear and cytoplasmic polyadenylated RNA-binding protein PUB1	PUB1
High	Master Protein	P29952	Mannose-6-phosphate isomerase OS=Saccharomyces cerevisiae (strain ATCC 204508 / S288c) OX=559292 GN=PMI40 PE=1 SV=4	0	7.479	4	2	3	2	429	48.2	5.99	4.73	2	Pf01238, Pf20511, Pf20512	856720	PMI40	Fructose and mannose metabolism; Amino sugar and nucleotide sugar metabolism; Metabolic pathways; Biosynthesis of secondary metabolites; Biosynthesis of cofactors; Biosynthesis of nucleotide sugars	Synthesis of GDP-mannose		7		100	0.01	-6.64386			300	Mannose-6-phosphate isomerase	PMI40
High	Master Protein	P32445	Single-stranded DNA-binding protein RIM1, mitochondrial OS=Saccharomyces cerevisiae (strain ATCC 204508 / S288c) OX=559292 GN=RIM1 PE=1 SV=1	0	7.368	22	2	2	2	135	15.4	8.34	2.43	2	Pf00436	850395	RIM1				0				#VALUE!				Single-stranded DNA-binding protein RIM1, mitochondrial	RIM1
High	Master Protein	P07263	Histidine--tRNA ligase, mitochondrial OS=Saccharomyces cerevisiae (strain ATCC 204508 / S288c) OX=559292 GN=HTS1 PE=1 SV=2	0	7.267	4	2	2	2	546	59.9	7.71	3	2	Pf03129, Pf13393	856145	HTS1	Aminoacyl-tRNA biosynthesis			1		100	0.01	-6.64386			300	Histidine--tRNA ligase, mitochondrial	HTS1
High	Master Protein	P39958	Rab GDP-dissociation inhibitor OS=Saccharomyces cerevisiae (strain ATCC 204508 / S288c) OX=559292 GN=GDI1 PE=1 SV=1	0	6.873	8	2	2	2	451	51.2	5.99	0	2	Pf00996	856876	GDI1		Neutrophil degranulation; RAB GEFs exchange GTP for GDP on RABs		2				#VALUE!				Rab GDP-dissociation inhibitor	GDI1
High	Master Protein	P51601	GTP cyclohydrolase 1 OS=Saccharomyces cerevisiae (strain ATCC 204508 / S288c) OX=559292 GN=FOL2 PE=1 SV=1	0	6.785	14	2	2	2	243	27.8	7.23	2.54	2	Pf01227	853183	FOL2	Folate biosynthesis; Metabolic pathways; Biosynthesis of cofactors	Tetrahydrobiopterin (BH4) synthesis, recycling, salvage and regulation		4		100	0.01	-6.64386			300	GTP cyclohydrolase 1	FOL2
High	Master Protein	P53622	Coatomer subunit alpha OS=Saccharomyces cerevisiae (strain ATCC 204508 / S288c) OX=559292 GN=COP1 PE=1 SV=2	0	6.627	2	2	2	2	1201	135.5	5.99	3.66	2	Pf00400, Pf04053, Pf06957	851410	COP1		COPI-mediated anterograde transport; COPI-dependent Golgi-to-ER retrograde traffic		2				#VALUE!				Coatomer subunit alpha	COP1
High	Master Protein	P38809	Uncharacterized protein YHR097C OS=Saccharomyces cerevisiae (strain ATCC 204508 / S288c) OX=559292 GN=YHR097C PE=1 SV=1	0	6.238	8	2	2	2	366	40.6	9.91	2.27	2	Pf08316	856497					0				#VALUE!				Uncharacterized protein YHR097C	YHR097C
High	Master Protein	P23644	Mitochondrial import receptor subunit TOM40 OS=Saccharomyces cerevisiae (strain ATCC 204508 / S288c) OX=559292 GN=TOM40 PE=1 SV=1	0	6.232	6	2	2	2	387	42	5.54	2.08	2	Pf01459	855243	TOM40				0		100	0.01	-6.64386			300	Mitochondrial import receptor subunit TOM40	TOM40
High	Master Protein	P38891	Branched-chain-amino-acid aminotransferase, mitochondrial OS=Saccharomyces cerevisiae (strain ATCC 204508 / S288c) OX=559292 GN=BAT1 PE=1 SV=1	0	6.104	11	3	3	2	393	43.6	8.91	0	3	Pf01063	856615	BAT1	Cysteine and methionine metabolism; Valine, leucine and isoleucine degradation; Valine, leucine and isoleucine biosynthesis; Pantothenate and CoA biosynthesis; Metabolic pathways; Biosynthesis of secondary metabolites; 2-Oxocarboxylic acid metabolism; Biosynthesis of amino acids; Biosynthesis of cofactors	Branched-chain amino acid catabolism		10		100	0.01	-6.64386			300	Branched-chain-amino-acid aminotransferase, mitochondrial	BAT1
High	Master Protein	P23369	54S ribosomal protein L25, mitochondrial OS=Saccharomyces cerevisiae (strain ATCC 204508 / S288c) OX=559292 GN=MRPL25 PE=1 SV=2	0	6.099	17	2	2	2	157	18.6	10.04	0	2	Pf18126	852967	MRPL25				0		100	0.01	-6.64386			300	54S ribosomal protein L25, mitochondrial	MRPL25
High	Master Protein	P20449	ATP-dependent RNA helicase DBP5 OS=Saccharomyces cerevisiae (strain ATCC 204508 / S288c) OX=559292 GN=DBP5 PE=1 SV=2	0	6.019	5	2	2	2	482	53.8	7.43	3.44	2	Pf00270, Pf00271	854211	DBP5	Nucleocytoplasmic transport; mRNA surveillance pathway			2		100	0.01	-6.64386			300	ATP-dependent RNA helicase DBP5	DBP5
High	Master Protein	P52488	Ubiquitin-activating enzyme E1-like OS=Saccharomyces cerevisiae (strain ATCC 204508 / S288c) OX=559292 GN=UBA2 PE=1 SV=1	0	5.865	6	2	2	2	636	71.2	5.14	0	2	Pf00899, Pf10585	851998	UBA2	Ubiquitin mediated proteolysis	SUMO is transferred from E1 to E2 (UBE2I, UBC9); SUMO is conjugated to E1 (UBA2:SAE1)		3				#VALUE!				Ubiquitin-activating enzyme E1-like	UBA2
High	Master Protein	P20606	Small COPII coat GTPase SAR1 OS=Saccharomyces cerevisiae (strain ATCC 204508 / S288c) OX=559292 GN=SAR1 PE=1 SV=1	0	5.805	13	2	2	2	190	21.4	5.38	3.41	2	Pf00025	855883	SAR1	Protein processing in endoplasmic reticulum	COPII-mediated vesicle transport; Cargo concentration in the ER; Antigen Presentation: Folding, assembly and peptide loading of class I MHC		4		100	0.01	-6.64386			300	Small COPII coat GTPase SAR1	SAR1
High	Master Protein	P27810	Alpha-1,2 mannosyltransferase KTR1 OS=Saccharomyces cerevisiae (strain ATCC 204508 / S288c) OX=559292 GN=KTR1 PE=1 SV=1	0	5.209	5	2	2	2	393	46	6.68	0	2	Pf01793	854266	KTR1	Other types of O-glycan biosynthesis			1				#VALUE!				Alpha-1,2 mannosyltransferase KTR1	KTR1
High	Master Protein	P22138	DNA-directed RNA polymerase I subunit RPA135 OS=Saccharomyces cerevisiae (strain ATCC 204508 / S288c) OX=559292 GN=RPA135 PE=1 SV=1	0	5.085	2	2	2	2	1203	135.7	7.65	1.91	2	Pf00562, Pf04560, Pf04561, Pf04563, Pf04565, Pf06883	856119	RPA135	RNA polymerase	RNA Polymerase I Promoter Escape; RNA Polymerase I Transcription Initiation	Eukaryotic transcription initiation	4				#VALUE!				DNA-directed RNA polymerase I subunit RPA135	RPA135
High	Master Protein	P32831	Negative growth regulatory protein NGR1 OS=Saccharomyces cerevisiae (strain ATCC 204508 / S288c) OX=559292 GN=NGR1 PE=1 SV=2	0	4.933	3	2	2	2	672	75	8.13	0	2	Pf00076	852513	NGR1				0				#VALUE!				Negative growth regulatory protein NGR1	NGR1
High	Master Protein	Q00055	Glycerol-3-phosphate dehydrogenase [NAD(+)] 1 OS=Saccharomyces cerevisiae (strain ATCC 204508 / S288c) OX=559292 GN=GPD1 PE=1 SV=4	0	4.789	5	2	2	2	391	42.8	5.47	4.42	2	Pf01210, Pf07479	851539	GPD1	Glycerophospholipid metabolism; Biosynthesis of secondary metabolites; MAPK signaling pathway	Synthesis of PA		4				#VALUE!				Glycerol-3-phosphate dehydrogenase [NAD(+)] 1	GPD1
High	Master Protein	P39685	Nucleoporin POM152 OS=Saccharomyces cerevisiae (strain ATCC 204508 / S288c) OX=559292 GN=POM152 PE=1 SV=1	0	4.77	2	2	2	2	1337	151.6	6.74	2.23	2		855159	POM152	Nucleocytoplasmic transport			1		100	0.01	-6.64386			300	Nucleoporin POM152	POM152
High	Master Protein	Q04225	Ribosome assembly protein RRB1 OS=Saccharomyces cerevisiae (strain ATCC 204508 / S288c) OX=559292 GN=RRB1 PE=1 SV=1	0	4.715	6	2	2	2	511	57.2	4.63	0	2	Pf00400, Pf12265	855161	RRB1				0		100	0.01	-6.64386			300	Ribosome assembly protein RRB1	RRB1
High	Master Protein	P38758	Putative oxidoreductase TDA3 OS=Saccharomyces cerevisiae (strain ATCC 204508 / S288c) OX=559292 GN=TDA3 PE=1 SV=2	0	4.659	6	2	2	2	523	57.6	5.83	0	2	Pf01266	856400	TDA3				0				#VALUE!				Putative oxidoreductase TDA3	TDA3
High	Master Protein	Q06218	ATP-dependent RNA helicase DBP9 OS=Saccharomyces cerevisiae (strain ATCC 204508 / S288c) OX=559292 GN=DBP9 PE=1 SV=1	0	4.632	3	2	2	2	594	68	9.19	3.93	2	Pf00270, Pf00271	850982	DBP9				0		100	0.01	-6.64386			300	ATP-dependent RNA helicase DBP9	DBP9
High	Master Protein	P28274	CTP synthase 1 OS=Saccharomyces cerevisiae (strain ATCC 204508 / S288c) OX=559292 GN=URA7 PE=1 SV=2	0	4.61	4	2	2	2	579	64.7	6.01	0	2	Pf00117, Pf06418	852241	URA7	Pyrimidine metabolism; Metabolic pathways; Nucleotide metabolism; Biosynthesis of cofactors	Interconversion of nucleotide di- and triphosphates		5		100	0.01	-6.64386			300	CTP synthase 1	URA7
High	Master Protein	P38773	2-deoxyglucose-6-phosphate phosphatase 2 OS=Saccharomyces cerevisiae (strain ATCC 204508 / S288c) OX=559292 GN=DOG2 PE=1 SV=1	0	4.571	8	2	2	2	246	27.1	5.74	2.19	2	Pf13419	856439	DOG2				0		100	0.01	-6.64386			300	2-deoxyglucose-6-phosphate phosphatase 2	DOG2
High	Master Protein	P39936	Eukaryotic initiation factor 4F subunit p130 OS=Saccharomyces cerevisiae (strain ATCC 204508 / S288c) OX=559292 GN=TIF4632 PE=1 SV=1	0	4.57	1	2	2	2	914	103.8	7.64	2.35	2	Pf02854, Pf12152	852833	TIF4632		L13a-mediated translational silencing of Ceruloplasmin expression; Translation initiation complex formation; Ribosomal scanning and start codon recognition; Nonsense Mediated Decay (NMD) independent of the Exon Junction Complex (EJC); Nonsense Mediated Decay (NMD) enhanced by the Exon Junction Complex (EJC); Activation of the mRNA upon binding of the cap-binding complex and eIFs, and subsequent b…		7		100	0.01	-6.64386			300	Eukaryotic initiation factor 4F subunit p130	TIF4632
High	Master Protein	P12385	Eukaryotic peptide chain release factor subunit 1 OS=Saccharomyces cerevisiae (strain ATCC 204508 / S288c) OX=559292 GN=SUP45 PE=1 SV=2	0	4.514	5	2	2	2	437	49	5.05	1.82	2	Pf03463, Pf03464, Pf03465	852440	SUP45	mRNA surveillance pathway	Nonsense Mediated Decay (NMD) independent of the Exon Junction Complex (EJC); Nonsense Mediated Decay (NMD) enhanced by the Exon Junction Complex (EJC); Eukaryotic Translation Termination		4				#VALUE!				Eukaryotic peptide chain release factor subunit 1	SUP45
High	Master Protein	P38199	Heterogeneous nuclear rnp K-like protein 2 OS=Saccharomyces cerevisiae (strain ATCC 204508 / S288c) OX=559292 GN=HEK2 PE=1 SV=1	0	4.41	10	2	2	2	381	41.7	6.06	1.79	2	Pf00013	852248	HEK2				0		100	0.01	-6.64386			300	Heterogeneous nuclear rnp K-like protein 2	HEK2
High	Master Protein	P38431	Eukaryotic translation initiation factor 5 OS=Saccharomyces cerevisiae (strain ATCC 204508 / S288c) OX=559292 GN=TIF5 PE=1 SV=1	0	4.381	9	2	2	2	405	45.2	5.06	0	2	Pf01873, Pf02020	856154	TIF5		Ribosomal scanning and start codon recognition		1		100	0.01	-6.64386			300	Eukaryotic translation initiation factor 5	TIF5
High	Master Protein	Q12024	Ribosome biogenesis protein YTM1 OS=Saccharomyces cerevisiae (strain ATCC 204508 / S288c) OX=559292 GN=YTM1 PE=1 SV=1	0	4.226	4	2	2	2	460	51.3	6.96	1.68	2	Pf00400, Pf08154	854446	YTM1		Major pathway of rRNA processing in the nucleolus and cytosol; Antigen processing: Ubiquitination & Proteasome degradation		2				#VALUE!				Ribosome biogenesis protein YTM1	YTM1
High	Master Protein	P53312	Succinate--CoA ligase [ADP-forming] subunit beta, mitochondrial OS=Saccharomyces cerevisiae (strain ATCC 204508 / S288c) OX=559292 GN=LSC2 PE=1 SV=1	0	4.129	5	2	2	2	427	46.9	7.47	2.14	2	Pf00549, Pf08442	853159	LSC2	Citrate cycle (TCA cycle); Propanoate metabolism; Metabolic pathways; Biosynthesis of secondary metabolites; Carbon metabolism	Citric acid cycle (TCA cycle)		6		100	0.01	-6.64386			300	Succinate--CoA ligase [ADP-forming] subunit beta, mitochondrial	LSC2
High	Master Protein	P16603	NADPH--cytochrome P450 reductase OS=Saccharomyces cerevisiae (strain ATCC 204508 / S288c) OX=559292 GN=NCP1 PE=1 SV=3	0	4.088	4	2	2	2	691	76.7	5.19	2.35	2	Pf00175, Pf00258, Pf00667	856438	NCP1		Tetrahydrobiopterin (BH4) synthesis, recycling, salvage and regulation; eNOS activation; VEGFR2 mediated vascular permeability; Extra-nuclear estrogen signaling; Peroxisomal protein import; ROS and RNS production in phagocytes; Nitric oxide stimulates guanylate cyclase; Ion homeostasis		8				#VALUE!				NADPH--cytochrome P450 reductase	NCP1
High	Master Protein	P24783	ATP-dependent RNA helicase DBP2 OS=Saccharomyces cerevisiae (strain ATCC 204508 / S288c) OX=559292 GN=DBP2 PE=1 SV=1	0	4.058	4	2	2	2	546	61	8.78	2.05	2	Pf00270, Pf00271	855611	DBP2	Spliceosome	Estrogen-dependent gene expression; SUMOylation of transcription cofactors		3		100	0.01	-6.64386			300	ATP-dependent RNA helicase DBP2	DBP2
High	Master Protein	Q05022	rRNA biogenesis protein RRP5 OS=Saccharomyces cerevisiae (strain ATCC 204508 / S288c) OX=559292 GN=RRP5 PE=1 SV=1	0	3.963	2	2	2	2	1729	193	6.19	0	2	Pf00575	855269	RRP5		Major pathway of rRNA processing in the nucleolus and cytosol		1				#VALUE!				rRNA biogenesis protein RRP5	RRP5
High	Master Protein	P34221	Protein phosphatase 2C homolog 3 OS=Saccharomyces cerevisiae (strain ATCC 204508 / S288c) OX=559292 GN=PTC3 PE=1 SV=4	0	3.445	5	2	2	2	468	51.3	4.63	0	2	Pf00481	852224	PTC3				0				#VALUE!				Protein phosphatase 2C homolog 3	PTC3
High	Master Protein	P43621	Coatomer subunit delta OS=Saccharomyces cerevisiae (strain ATCC 204508 / S288c) OX=559292 GN=RET2 PE=1 SV=3	0	3.295	4	2	2	2	546	60.6	5.2	0	2	Pf01217	850612	RET2		COPI-mediated anterograde transport; COPI-dependent Golgi-to-ER retrograde traffic		2		100	0.01	-6.64386			300	Coatomer subunit delta	RET2
High	Master Protein	P07244	Bifunctional purine biosynthetic protein ADE5,7 OS=Saccharomyces cerevisiae (strain ATCC 204508 / S288c) OX=559292 GN=ADE57 PE=1 SV=1	0	3.12	5	2	2	2	802	86	5.27	0	2	Pf00586, Pf01071, Pf02769, Pf02843, Pf02844	852617	ADE57	Purine metabolism; Metabolic pathways; Biosynthesis of secondary metabolites	Purine ribonucleoside monophosphate biosynthesis		4				#VALUE!				Bifunctional purine biosynthetic protein ADE5,7	ADE57
High	Master Protein	P35179	Protein transport protein SSS1 OS=Saccharomyces cerevisiae (strain ATCC 204508 / S288c) OX=559292 GN=SSS1 PE=1 SV=2	0.002	2.922	23	2	2	2	80	8.9	9.45	0	2	Pf00584	851659	SSS1	Protein export; Protein processing in endoplasmic reticulum; Phagosome	Insertion of tail-anchored proteins into the endoplasmic reticulum membrane		4		100	0.01	-6.64386			300	Protein transport protein SSS1	SSS1
High	Master Protein	P39076	T-complex protein 1 subunit beta OS=Saccharomyces cerevisiae (strain ATCC 204508 / S288c) OX=559292 GN=CCT2 PE=1 SV=1	0.002	2.669	5	2	2	2	527	57.2	6.11	0	2	Pf00118	854664	CCT2		Neutrophil degranulation; RHOBTB2 GTPase cycle; Association of TriC/CCT with target proteins during biosynthesis; Cooperation of PDCL (PhLP1) and TRiC/CCT in G-protein beta folding; RHOBTB1 GTPase cycle		5				#VALUE!				T-complex protein 1 subunit beta	CCT2
High	Master Protein	P24280	SEC14 cytosolic factor OS=Saccharomyces cerevisiae (strain ATCC 204508 / S288c) OX=559292 GN=SEC14 PE=1 SV=3	0.001	2.63	7	2	2	2	304	34.9	5.49	0	2	Pf00650, Pf03765	855103	SEC14				0		100	0.01	-6.64386			300	SEC14 cytosolic factor	SEC14
High	Master Protein	P40961	Prohibitin-1 OS=Saccharomyces cerevisiae (strain ATCC 204508 / S288c) OX=559292 GN=PHB1 PE=1 SV=2	0.001	2.353	6	2	2	2	287	31.4	8.25	0	2	Pf01145	853033	PHB1				0		100	0.01	-6.64386			300	Prohibitin-1	PHB1
High	Master Protein	P10664	60S ribosomal protein L4-A OS=Saccharomyces cerevisiae (strain ATCC 204508 / S288c) OX=559292 GN=RPL4A PE=1 SV=4	0	146.041	63	23	49	1	362	39.1	10.64	80.84	23	Pf00573, Pf14374	852319	RPL4A	Ribosome	L13a-mediated translational silencing of Ceruloplasmin expression; SRP-dependent cotranslational protein targeting to membrane; Formation of a pool of free 40S subunits; GTP hydrolysis and joining of the 60S ribosomal subunit; Nonsense Mediated Decay (NMD) independent of the Exon Junction Complex (EJC); Nonsense Mediated Decay (NMD) enhanced by the Exon Junction Complex (EJC)		7	0.462	1.342	0.313	-1.67577	27.2	103.1	169.7	60S ribosomal protein L4-A	RPL4A
High	Master Protein	P49626	60S ribosomal protein L4-B OS=Saccharomyces cerevisiae (strain ATCC 204508 / S288c) OX=559292 GN=RPL4B PE=1 SV=2	0	145.981	63	23	49	1	362	39	10.64	80.84	23	Pf00573, Pf14374	851575	RPL4B	Ribosome	L13a-mediated translational silencing of Ceruloplasmin expression; SRP-dependent cotranslational protein targeting to membrane; Formation of a pool of free 40S subunits; GTP hydrolysis and joining of the 60S ribosomal subunit; Nonsense Mediated Decay (NMD) independent of the Exon Junction Complex (EJC); Nonsense Mediated Decay (NMD) enhanced by the Exon Junction Complex (EJC)		7		100	0.01	-6.64386			300	60S ribosomal protein L4-B	RPL4B
High	Master Protein	P0C2I9	Transposon Ty1-PR1 Gag-Pol polyprotein OS=Saccharomyces cerevisiae (strain ATCC 204508 / S288c) OX=559292 GN=TY1B-PR1 PE=3 SV=1	0	134.321	11	14	25	1	1755	198.4	8.25	57.98	14	Pf00665, Pf01021, Pf07727	856257	TY1B-PR1				0	1.455	2.664	0.612	-0.708396	130	42.7	127.3	Transposon Ty1-PR1 Gag-Pol polyprotein	TY1B-PR1
High	Master Protein	P0CX57	Transposon Ty1-A Gag polyprotein OS=Saccharomyces cerevisiae (strain ATCC 204508 / S288c) OX=559292 GN=TY1A-A PE=2 SV=1	0	126.217	38	13	23	1	440	49	7.64	56.43	13	Pf01021	851269; 856258	TY1A-A				0		100	0.01	-6.64386			300	Transposon Ty1-A Gag polyprotein	TY1A-A
High	Master Protein	Q12485	Transposon Ty1-GR2 Gag polyprotein OS=Saccharomyces cerevisiae (strain ATCC 204508 / S288c) OX=559292 GN=TY1A-GR2 PE=2 SV=1	0	110.181	39	13	22	1	440	49	8.19	50.72	13	Pf01021	852929	TY1A-GR2				0				#VALUE!				Transposon Ty1-GR2 Gag polyprotein	TY1A-GR2
High	Master Protein	P50095	Inosine-5'-monophosphate dehydrogenase 3 OS=Saccharomyces cerevisiae (strain ATCC 204508 / S288c) OX=559292 GN=IMD3 PE=1 SV=1	0	62.843	26	10	12	1	523	56.5	7.4	22.04	10	Pf00478, Pf00571	851152	IMD3	Purine metabolism; Metabolic pathways; Biosynthesis of secondary metabolites; Nucleotide metabolism	Neutrophil degranulation; Purine ribonucleoside monophosphate biosynthesis; Azathioprine ADME		7		100	0.01	-6.64386			300	Inosine-5'-monophosphate dehydrogenase 3	IMD3
High	Master Protein	Q02753	60S ribosomal protein L21-A OS=Saccharomyces cerevisiae (strain ATCC 204508 / S288c) OX=559292 GN=RPL21A PE=1 SV=1	0	52.283	58	10	20	1	160	18.2	10.39	42.82	10	Pf01157	852489	RPL21A	Ribosome	L13a-mediated translational silencing of Ceruloplasmin expression; Nonsense Mediated Decay (NMD) independent of the Exon Junction Complex (EJC); Nonsense Mediated Decay (NMD) enhanced by the Exon Junction Complex (EJC); SRP-dependent cotranslational protein targeting to membrane; Formation of a pool of free 40S subunits; GTP hydrolysis and joining of the 60S ribosomal subunit		7	2.521	1.616	1.485	0.570463	117.4	60	122.6	60S ribosomal protein L21-A	RPL21A
High	Master Protein	P51401	60S ribosomal protein L9-B OS=Saccharomyces cerevisiae (strain ATCC 204508 / S288c) OX=559292 GN=RPL9B PE=1 SV=1	0	49.841	52	8	14	1	191	21.6	9.66	23.4	8	Pf00347	855658	RPL9B	Ribosome	Nonsense Mediated Decay (NMD) independent of the Exon Junction Complex (EJC); Nonsense Mediated Decay (NMD) enhanced by the Exon Junction Complex (EJC); L13a-mediated translational silencing of Ceruloplasmin expression; SRP-dependent cotranslational protein targeting to membrane; Formation of a pool of free 40S subunits; GTP hydrolysis and joining of the 60S ribosomal subunit		7				#VALUE!				60S ribosomal protein L9-B	RPL9B
High	Master Protein	Q12672	60S ribosomal protein L21-B OS=Saccharomyces cerevisiae (strain ATCC 204508 / S288c) OX=559292 GN=RPL21B PE=1 SV=1	0	49.566	58	10	20	1	160	18.3	10.39	42.42	10	Pf01157	856026	RPL21B	Ribosome			1		100	0.01	-6.64386			300	60S ribosomal protein L21-B	RPL21B
High	Master Protein	P53221	60S ribosomal protein L26-B OS=Saccharomyces cerevisiae (strain ATCC 204508 / S288c) OX=559292 GN=RPL26B PE=1 SV=2	0	44.07	66	14	19	1	127	14.2	10.46	28.72	14	Pf00467, Pf16906	852922	RPL26B	Ribosome	L13a-mediated translational silencing of Ceruloplasmin expression; SRP-dependent cotranslational protein targeting to membrane; Formation of a pool of free 40S subunits; GTP hydrolysis and joining of the 60S ribosomal subunit; Nonsense Mediated Decay (NMD) independent of the Exon Junction Complex (EJC); Nonsense Mediated Decay (NMD) enhanced by the Exon Junction Complex (EJC)		7		100	0.01	-6.64386			300	60S ribosomal protein L26-B	RPL26B
High	Master Protein	P0C2H9	60S ribosomal protein L31-B OS=Saccharomyces cerevisiae (strain ATCC 204508 / S288c) OX=559292 GN=RPL31B PE=1 SV=1	0	39.501	72	9	12	1	113	13	9.99	23.86	9	Pf01198	851122	RPL31B	Ribosome	L13a-mediated translational silencing of Ceruloplasmin expression; SRP-dependent cotranslational protein targeting to membrane; Formation of a pool of free 40S subunits; GTP hydrolysis and joining of the 60S ribosomal subunit; Nonsense Mediated Decay (NMD) independent of the Exon Junction Complex (EJC); Nonsense Mediated Decay (NMD) enhanced by the Exon Junction Complex (EJC)		7		100	0.01	-6.64386			300	60S ribosomal protein L31-B	RPL31B
High	Master Protein	P19146	ADP-ribosylation factor 2 OS=Saccharomyces cerevisiae (strain ATCC 204508 / S288c) OX=559292 GN=ARF2 PE=1 SV=3	0	37.903	49	8	11	1	181	20.6	7.34	24.01	8	Pf00025	851418	ARF2	Endocytosis	COPI-mediated anterograde transport; COPI-dependent Golgi-to-ER retrograde traffic; Synthesis of PIPs at the Golgi membrane; trans-Golgi Network Vesicle Budding; VxPx cargo-targeting to cilium; Intra-Golgi traffic		7				#VALUE!				ADP-ribosylation factor 2	ARF2
High	Master Protein	P19211	Eukaryotic translation initiation factor 5A-2 OS=Saccharomyces cerevisiae (strain ATCC 204508 / S288c) OX=559292 GN=ANB1 PE=1 SV=3	0	11.918	17	3	9	1	157	17.1	4.96	15.41	3	Pf01287	853506	ANB1		Hypusine synthesis from eIF5A-lysine		1				#VALUE!				Eukaryotic translation initiation factor 5A-2	ANB1
High	Master Protein	P10622	60S acidic ribosomal protein P1-beta OS=Saccharomyces cerevisiae (strain ATCC 204508 / S288c) OX=559292 GN=RPP1B PE=1 SV=3	0	8.127	15	1	1	1	106	10.7	4.01	4.75	1	Pf00428	851427	RPP1B	Ribosome			1		100	0.01	-6.64386			300	60S acidic ribosomal protein P1-beta	RPP1B
High	Master Protein	P38009	Bifunctional purine biosynthesis protein ADE17 OS=Saccharomyces cerevisiae (strain ATCC 204508 / S288c) OX=559292 GN=ADE17 PE=1 SV=2	0	6.112	7	3	3	1	592	65.2	6.55	2.07	3	Pf01808, Pf02142	855149	ADE17	Purine metabolism; One carbon pool by folate; Metabolic pathways; Biosynthesis of secondary metabolites	Purine ribonucleoside monophosphate biosynthesis		5				#VALUE!				Bifunctional purine biosynthesis protein ADE17	ADE17
High	Master Protein	P39990	13 kDa ribonucleoprotein-associated protein OS=Saccharomyces cerevisiae (strain ATCC 204508 / S288c) OX=559292 GN=SNU13 PE=1 SV=1	0	4.773	19	1	1	1	126	13.6	7.85	2.89	1	Pf01248	856687	SNU13	Ribosome biogenesis in eukaryotes; Spliceosome	Major pathway of rRNA processing in the nucleolus and cytosol		3				#VALUE!				13 kDa ribonucleoprotein-associated protein	SNU13
High	Master Protein	P22139	DNA-directed RNA polymerases I, II, and III subunit RPABC5 OS=Saccharomyces cerevisiae (strain ATCC 204508 / S288c) OX=559292 GN=RPB10 PE=1 SV=2	0	4.375	16	1	1	1	70	8.3	7.78	2.1	1	Pf01194	854385	RPB10	RNA polymerase	Formation of the Early Elongation Complex; RNA Polymerase II Pre-transcription Events; Formation of TC-NER Pre-Incision Complex; Dual incision in TC-NER; Gap-filling DNA repair synthesis and ligation in TC-NER; TP53 Regulates Transcription of DNA Repair Genes; RNA polymerase II transcribes snRNA genes; mRNA Capping; RNA Polymerase II Promoter Escape; RNA Polymerase II Transcription Pre-Initiation…		19				#VALUE!				DNA-directed RNA polymerases I, II, and III subunit RPABC5	RPB10
High	Master Protein	P40089	U6 snRNA-associated Sm-like protein LSm5 OS=Saccharomyces cerevisiae (strain ATCC 204508 / S288c) OX=559292 GN=LSM5 PE=1 SV=1	0	4.125	17	1	1	1	93	10.4	4.63	1.74	1	Pf01423	856889	LSM5	RNA degradation; Spliceosome	mRNA decay by 5' to 3' exoribonuclease		3				#VALUE!				U6 snRNA-associated Sm-like protein LSm5	LSM5
High	Master Protein	P20434	DNA-directed RNA polymerases I, II, and III subunit RPABC1 OS=Saccharomyces cerevisiae (strain ATCC 204508 / S288c) OX=559292 GN=RPB5 PE=1 SV=1	0	3.133	14	1	1	1	215	25.1	9.1	0	1	Pf01191, Pf03871	852451	RPB5	RNA polymerase	Formation of the Early Elongation Complex; RNA Polymerase II Pre-transcription Events; Formation of TC-NER Pre-Incision Complex; Dual incision in TC-NER; Gap-filling DNA repair synthesis and ligation in TC-NER; TP53 Regulates Transcription of DNA Repair Genes; RNA polymerase II transcribes snRNA genes; mRNA Capping; RNA Polymerase II Promoter Escape; RNA Polymerase II Transcription Pre-Initiation…	Eukaryotic transcription initiation	20				#VALUE!				DNA-directed RNA polymerases I, II, and III subunit RPABC1	RPB5
High	Master Protein	P53111	NADPH-dependent aldehyde reductase ARI1 OS=Saccharomyces cerevisiae (strain ATCC 204508 / S288c) OX=559292 GN=ARI1 PE=1 SV=1	0.002	2.98	6	2	2	1	347	38.1	5.88	0	2	Pf01370	852720	ARI1				0				#VALUE!				NADPH-dependent aldehyde reductase ARI1	ARI1
High	Master Protein	P18238	ADP,ATP carrier protein 3 OS=Saccharomyces cerevisiae (strain ATCC 204508 / S288c) OX=559292 GN=AAC3 PE=1 SV=1	0.002	2.861	6	2	2	1	307	33.3	9.8	2.47	2	Pf00153	852380	AAC3		Mitochondrial protein import		1				#VALUE!				ADP,ATP carrier protein 3	AAC3
High	Master Protein	P53183	Putative uncharacterized oxidoreductase YGL039W OS=Saccharomyces cerevisiae (strain ATCC 204508 / S288c) OX=559292 GN=YGL039W PE=1 SV=1	0.002	2.795	7	2	2	1	348	38.2	5.96	0	2	Pf01370	852844					0				#VALUE!				Putative uncharacterized oxidoreductase YGL039W	YGL039W
High	Master Protein	P05747	60S ribosomal protein L29 OS=Saccharomyces cerevisiae (strain ATCC 204508 / S288c) OX=559292 GN=RPL29 PE=1 SV=3	0.001	2.17	14	1	1	1	59	6.7	11.31	0	1	Pf01779	850592	RPL29	Ribosome	L13a-mediated translational silencing of Ceruloplasmin expression; Nonsense Mediated Decay (NMD) independent of the Exon Junction Complex (EJC); Nonsense Mediated Decay (NMD) enhanced by the Exon Junction Complex (EJC); SRP-dependent cotranslational protein targeting to membrane; Formation of a pool of free 40S subunits; GTP hydrolysis and joining of the 60S ribosomal subunit		7		100	0.01	-6.64386			300	60S ribosomal protein L29	RPL29
High	Master Protein	Q06406	U6 snRNA-associated Sm-like protein LSm6 OS=Saccharomyces cerevisiae (strain ATCC 204508 / S288c) OX=559292 GN=LSM6 PE=1 SV=2	0.004	1.664	21	1	1	1	86	9.4	5.97	0	1	Pf01423	851984	LSM6	RNA degradation; Spliceosome	mRNA decay by 5' to 3' exoribonuclease		3				#VALUE!				U6 snRNA-associated Sm-like protein LSm6	LSM6
High	Master Protein	P40302	Proteasome subunit alpha type-6 OS=Saccharomyces cerevisiae (strain ATCC 204508 / S288c) OX=559292 GN=PRE5 PE=1 SV=1	0	4.011	9	1	1	1	234	25.6	7.39	0	1	Pf00227, Pf10584	855362	PRE5	Proteasome	Cross-presentation of soluble exogenous antigens (endosomes); TNFR2 non-canonical NF-kB pathway; Ub-specific processing proteases	Proteasome degradation	5				#VALUE!				Proteasome subunit alpha type-6	PRE5
High	Master Protein	Q12040	Broad-specificity phosphatase YOR283W OS=Saccharomyces cerevisiae (strain ATCC 204508 / S288c) OX=559292 GN=YOR283W PE=1 SV=1	0.002	3.054	9	1	1	1	230	26.2	7.96	0	1	Pf00300	854457					0				#VALUE!				Broad-specificity phosphatase YOR283W	YOR283W
High	Master Protein	P36015	Synaptobrevin homolog YKT6 OS=Saccharomyces cerevisiae (strain ATCC 204508 / S288c) OX=559292 GN=YKT6 PE=1 SV=1	0.002	2.632	9	1	1	1	200	22.7	5.69	0	1	Pf00957, Pf13774	853638	YKT6	SNARE interactions in vesicular transport; Autophagy	COPII-mediated vesicle transport; COPI-mediated anterograde transport; Intra-Golgi traffic		5				#VALUE!				Synaptobrevin homolog YKT6	YKT6
High	Master Protein	P32366	V-type proton ATPase subunit d OS=Saccharomyces cerevisiae (strain ATCC 204508 / S288c) OX=559292 GN=VMA6 PE=1 SV=2	0	3.781	8	1	1	1	345	39.8	4.6	0	1	Pf01992	851168	VMA6	Oxidative phosphorylation; Metabolic pathways; Phagosome	ROS and RNS production in phagocytes; Insulin receptor recycling; Transferrin endocytosis and recycling; Amino acids regulate mTORC1		7				#VALUE!				V-type proton ATPase subunit d	VMA6
High	Master Protein	P27999	DNA-directed RNA polymerase II subunit RPB9 OS=Saccharomyces cerevisiae (strain ATCC 204508 / S288c) OX=559292 GN=RPB9 PE=1 SV=1	0.009	1.329	8	1	1	1	122	14.3	7.61	0	1	Pf01096, Pf02150	852810	RPB9	RNA polymerase	Formation of the Early Elongation Complex; RNA Polymerase II Pre-transcription Events; Formation of TC-NER Pre-Incision Complex; Dual incision in TC-NER; Gap-filling DNA repair synthesis and ligation in TC-NER; TP53 Regulates Transcription of DNA Repair Genes; RNA polymerase II transcribes snRNA genes; mRNA Capping; RNA Polymerase II Promoter Escape; RNA Polymerase II Transcription Pre-Initiation…		15		100	0.01	-6.64386			300	DNA-directed RNA polymerase II subunit RPB9	RPB9
High	Master Protein	P40893	Regulation of enolase protein 1 OS=Saccharomyces cerevisiae (strain ATCC 204508 / S288c) OX=559292 GN=REE1 PE=1 SV=1	0	5.318	7	1	1	1	198	22	6.39	2.62	1	Pf07081	853238	REE1				0		100	0.01	-6.64386			300	Regulation of enolase protein 1	REE1
High	Master Protein	P25719	Peptidyl-prolyl cis-trans isomerase C, mitochondrial OS=Saccharomyces cerevisiae (strain ATCC 204508 / S288c) OX=559292 GN=CPR3 PE=1 SV=1	0	5.01	7	1	1	1	182	19.9	8.7	2.32	1	Pf00160	854897	CPR3		Neutrophil degranulation		1				#VALUE!				Peptidyl-prolyl cis-trans isomerase C, mitochondrial	CPR3
High	Master Protein	P49435	Adenine phosphoribosyltransferase 1 OS=Saccharomyces cerevisiae (strain ATCC 204508 / S288c) OX=559292 GN=APT1 PE=1 SV=3	0	4.003	7	1	1	1	187	20.6	5.1	1.76	1	Pf00156	854986	APT1	Purine metabolism; Metabolic pathways; Nucleotide metabolism	Neutrophil degranulation; Purine salvage		5				#VALUE!				Adenine phosphoribosyltransferase 1	APT1
High	Master Protein	P38912	Eukaryotic translation initiation factor 1A OS=Saccharomyces cerevisiae (strain ATCC 204508 / S288c) OX=559292 GN=TIF11 PE=1 SV=1	0	3.575	7	1	1	1	153	17.4	4.83	2.28	1	Pf01176	855302	TIF11		L13a-mediated translational silencing of Ceruloplasmin expression; Formation of a pool of free 40S subunits; Translation initiation complex formation; Formation of the ternary complex, and subsequently, the 43S complex; Ribosomal scanning and start codon recognition		5		100	0.01	-6.64386			300	Eukaryotic translation initiation factor 1A	TIF11
High	Master Protein	Q12522	Eukaryotic translation initiation factor 6 OS=Saccharomyces cerevisiae (strain ATCC 204508 / S288c) OX=559292 GN=TIF6 PE=1 SV=1	0.001	2.101	7	1	1	1	245	26.4	4.64	0	1	Pf01912	856126	TIF6	Ribosome biogenesis in eukaryotes			1		100	0.01	-6.64386			300	Eukaryotic translation initiation factor 6	TIF6
High	Master Protein	P61830	Histone H3 OS=Saccharomyces cerevisiae (strain ATCC 204508 / S288c) OX=559292 GN=HHT2 PE=1 SV=2	0.001	2.05	7	1	1	1	136	15.3	11.43	0	1	Pf00125	852295; 855700	HHT1; HHT2				0		100	0.01	-6.64386			300	Histone H3	HHT2
High	Master Protein	O13563	26S proteasome regulatory subunit RPN13 OS=Saccharomyces cerevisiae (strain ATCC 204508 / S288c) OX=559292 GN=RPN13 PE=1 SV=1	0.001	1.998	7	1	1	1	156	17.9	4.53	0	1	Pf04683	851140	RPN13	Proteasome			1				#VALUE!				26S proteasome regulatory subunit RPN13	RPN13
High	Master Protein	Q05933	Actin-related protein 2/3 complex subunit 3 OS=Saccharomyces cerevisiae (strain ATCC 204508 / S288c) OX=559292 GN=ARC18 PE=1 SV=1	0.007	1.572	7	1	1	1	178	20.6	7.97	0	1	Pf04062	851085	ARC18	Autophagy; Endocytosis	Regulation of actin dynamics for phagocytic cup formation; RHO GTPases Activate WASPs and WAVEs		4				#VALUE!				Actin-related protein 2/3 complex subunit 3	e
High	Master Protein	P16140	V-type proton ATPase subunit B OS=Saccharomyces cerevisiae (strain ATCC 204508 / S288c) OX=559292 GN=VMA2 PE=1 SV=2	0	73.144	40	13	16	13	517	57.7	5.07	29.03	13	Pf00006, Pf02874	852424	VMA2	Oxidative phosphorylation; Metabolic pathways; Phagosome	ROS and RNS production in phagocytes; Insulin receptor recycling; Transferrin endocytosis and recycling; Amino acids regulate mTORC1		7	100	100	0.851	-0.232769	23.3		276.7	V-type proton ATPase subunit B	VMA2
High	Master Protein	Q99247	DUB-associated factor 1 OS=Saccharomyces cerevisiae (strain ATCC 204508 / S288c) OX=559292 GN=DUF1 PE=1 SV=1	0	40.353	15	12	12	12	1116	125.3	6.68	15	12	Pf11816	854066	DUF1		Recognition of DNA damage by PCNA-containing replication complex		1	100	100	6.237	2.64085	206.1		93.9	DUB-associated factor 1	DUF1
High	Master Protein	P32327	Pyruvate carboxylase 2 OS=Saccharomyces cerevisiae (strain ATCC 204508 / S288c) OX=559292 GN=PYC2 PE=1 SV=2	0	34.57	13	11	12	11	1180	130.1	6.51	13.48	11	Pf00289, Pf00364, Pf00682, Pf02436, Pf02785, Pf02786	852519	PYC2	Citrate cycle (TCA cycle); Pyruvate metabolism; Metabolic pathways; Carbon metabolism; Biosynthesis of amino acids			5	100	100	1.489	0.574344	92		208	Pyruvate carboxylase 2	PYC2
High	Master Protein	P22137	Clathrin heavy chain OS=Saccharomyces cerevisiae (strain ATCC 204508 / S288c) OX=559292 GN=CHC1 PE=1 SV=1	0	33.751	8	10	10	10	1653	187.1	5.24	8.29	10	Pf00637, Pf01394, Pf09268, Pf13838	852666	CHC1	Endocytosis	VLDLR internalisation and degradation; LDL clearance; Recycling pathway of L1; RHOV GTPase cycle; Lysosome Vesicle Biogenesis; Clathrin-mediated endocytosis; RHOU GTPase cycle		8	100	100	4.202	2.07108	184.9		115.1	Clathrin heavy chain	CHC1
High	Master Protein	P32449	Phospho-2-dehydro-3-deoxyheptonate aldolase, tyrosine-inhibited OS=Saccharomyces cerevisiae (strain ATCC 204508 / S288c) OX=559292 GN=ARO4 PE=1 SV=2	0	40.954	32	8	8	8	370	39.7	6.95	19.54	8	Pf00793	852551	ARO4	Phenylalanine, tyrosine and tryptophan biosynthesis; Metabolic pathways; Biosynthesis of secondary metabolites; Biosynthesis of amino acids			4	100	100	0.837	-0.2567	67.3		232.7	Phospho-2-dehydro-3-deoxyheptonate aldolase, tyrosine-inhibited	ARO4
High	Master Protein	P15496	Isopentenyl-diphosphate delta-isomerase OS=Saccharomyces cerevisiae (strain ATCC 204508 / S288c) OX=559292 GN=IDI1 PE=1 SV=2	0	35.792	25	8	8	8	288	33.3	4.98	18.91	8	Pf00293	855986	IDI1	Terpenoid backbone biosynthesis; Metabolic pathways; Biosynthesis of secondary metabolites	Cholesterol biosynthesis	Cholesterol biosynthesis	5	100	100	3.367	1.75146	191.1		108.9	Isopentenyl-diphosphate delta-isomerase	IDI1
High	Master Protein	P37302	Aminopeptidase Y OS=Saccharomyces cerevisiae (strain ATCC 204508 / S288c) OX=559292 GN=APE3 PE=1 SV=1	0	34.571	23	8	8	8	537	60.1	5.31	17.54	8	Pf02225, Pf04389	852589	APE3				0	100	100	3.435	1.78031	103.2		196.8	Aminopeptidase Y	APE3
High	Master Protein	P15303	Protein transport protein SEC23 OS=Saccharomyces cerevisiae (strain ATCC 204508 / S288c) OX=559292 GN=SEC23 PE=1 SV=1	0	24.075	13	8	8	8	768	85.3	5.66	8.26	8	Pf00626, Pf04810, Pf04811, Pf04815, Pf08033	856311	SEC23	Protein processing in endoplasmic reticulum	COPII-mediated vesicle transport; Cargo concentration in the ER; Antigen Presentation: Folding, assembly and peptide loading of class I MHC		4	100	100	1.439	0.525067	96.9		203.1	Protein transport protein SEC23	SEC23
High	Master Protein	P38911	Peptidyl-prolyl cis-trans isomerase OS=Saccharomyces cerevisiae (strain ATCC 204508 / S288c) OX=559292 GN=FPR3 PE=1 SV=2	0	23.06	13	6	6	6	411	46.5	4.46	13.24	6	Pf00254, Pf17800	854901	FPR3				0	100	100	5.868	2.55287	136.4		163.6	Peptidyl-prolyl cis-trans isomerase	FPR3
High	Master Protein	P34167	Eukaryotic translation initiation factor 4B OS=Saccharomyces cerevisiae (strain ATCC 204508 / S288c) OX=559292 GN=TIF3 PE=1 SV=1	0	17.932	21	6	6	6	436	48.5	5.29	12.59	6		856292	TIF3				0	100	100	1.807	0.853597	193.1		106.9	Eukaryotic translation initiation factor 4B	TIF3
High	Master Protein	P49167	60S ribosomal protein L38 OS=Saccharomyces cerevisiae (strain ATCC 204508 / S288c) OX=559292 GN=RPL38 PE=1 SV=1	0	17.288	53	6	7	6	78	8.8	10.93	4.5	6	Pf01781	851035	RPL38	Ribosome	L13a-mediated translational silencing of Ceruloplasmin expression; SRP-dependent cotranslational protein targeting to membrane; Formation of a pool of free 40S subunits; GTP hydrolysis and joining of the 60S ribosomal subunit; Nonsense Mediated Decay (NMD) independent of the Exon Junction Complex (EJC); Nonsense Mediated Decay (NMD) enhanced by the Exon Junction Complex (EJC)		7	100	100	0.631	-0.664288	18.5		281.5	60S ribosomal protein L38	RPL38
High	Master Protein	P40037	Protein HMF1 OS=Saccharomyces cerevisiae (strain ATCC 204508 / S288c) OX=559292 GN=HMF1 PE=1 SV=1	0	27.032	57	5	5	5	129	13.9	5.41	12.61	5	Pf01042	856785	HMF1				0	100	100	0.505	-0.985645	45.5		254.5	Protein HMF1	HMF1
High	Master Protein	Q03161	Glucose-6-phosphate 1-epimerase OS=Saccharomyces cerevisiae (strain ATCC 204508 / S288c) OX=559292 GN=YMR099C PE=1 SV=1	0	15.359	24	5	5	5	297	33.9	6.13	4	5	Pf01263	855125		Glycolysis / Gluconeogenesis; Metabolic pathways; Biosynthesis of secondary metabolites			3	100	100	4.418	2.14339	269.5		30.5	Glucose-6-phosphate 1-epimerase	YMR099C
High	Master Protein	Q12449	Hsp90 co-chaperone AHA1 OS=Saccharomyces cerevisiae (strain ATCC 204508 / S288c) OX=559292 GN=AHA1 PE=1 SV=1	0	14.725	17	5	5	5	350	39.4	7.47	6.14	5	Pf08327, Pf09229	851800	AHA1				0	100	100	2.806	1.48852	41		259	Hsp90 co-chaperone AHA1	AHA1
High	Master Protein	P38625	GMP synthase [glutamine-hydrolyzing] OS=Saccharomyces cerevisiae (strain ATCC 204508 / S288c) OX=559292 GN=GUA1 PE=1 SV=4	0	12.256	10	5	5	5	525	58.4	6.49	6.66	5	Pf00117, Pf00958, Pf02540	855257	GUA1	Purine metabolism; Metabolic pathways; Nucleotide metabolism	Purine ribonucleoside monophosphate biosynthesis; Azathioprine ADME		5	100	100	1.681	0.74932	152		148	GMP synthase [glutamine-hydrolyzing]	GUA1
High	Master Protein	P16649	General transcriptional corepressor TUP1 OS=Saccharomyces cerevisiae (strain ATCC 204508 / S288c) OX=559292 GN=TUP1 PE=1 SV=2	0	11.845	8	5	5	5	713	78.3	5.68	4.2	5	Pf00400, Pf08581	850445	TUP1	MAPK signaling pathway; Cell cycle			2	100	100	2.056	1.03984	175.4		124.6	General transcriptional corepressor TUP1	TUP1
High	Master Protein	P02400	60S acidic ribosomal protein P2-beta OS=Saccharomyces cerevisiae (strain ATCC 204508 / S288c) OX=559292 GN=RPP2B PE=1 SV=2	0	27.574	82	4	5	4	110	11	4.15	11.16	4	Pf00428	851990	RPP2B	Ribosome	L13a-mediated translational silencing of Ceruloplasmin expression; SRP-dependent cotranslational protein targeting to membrane; Formation of a pool of free 40S subunits; GTP hydrolysis and joining of the 60S ribosomal subunit; Nonsense Mediated Decay (NMD) independent of the Exon Junction Complex (EJC); Nonsense Mediated Decay (NMD) enhanced by the Exon Junction Complex (EJC)		7	100	100	0.501	-0.997117	41.9		258.1	60S acidic ribosomal protein P2-beta	RPP2B
High	Master Protein	P05319	60S acidic ribosomal protein P2-alpha OS=Saccharomyces cerevisiae (strain ATCC 204508 / S288c) OX=559292 GN=RPP2A PE=1 SV=1	0	22.631	66	4	5	4	106	10.7	4.04	6.5	4	Pf00428	854118	RPP2A	Ribosome			1	100	100	3.006	1.58785	82.7		217.3	60S acidic ribosomal protein P2-alpha	RPP2A
High	Master Protein	P00890	Citrate synthase, mitochondrial OS=Saccharomyces cerevisiae (strain ATCC 204508 / S288c) OX=559292 GN=CIT1 PE=1 SV=2	0	10.265	11	4	4	4	479	53.3	8.29	3.92	4	Pf00285	855732	CIT1	Citrate cycle (TCA cycle); Glyoxylate and dicarboxylate metabolism; Metabolic pathways; Biosynthesis of secondary metabolites; Carbon metabolism; 2-Oxocarboxylic acid metabolism; Biosynthesis of amino acids	Citric acid cycle (TCA cycle)		8	100		3.333	1.73682	300		90	Citrate synthase, mitochondrial	CIT1
High	Master Protein	P12709	Glucose-6-phosphate isomerase OS=Saccharomyces cerevisiae (strain ATCC 204508 / S288c) OX=559292 GN=PGI1 PE=1 SV=3	0	9.536	12	4	4	4	554	61.3	6.46	3.91	4	Pf00342	852495	PGI1	Glycolysis / Gluconeogenesis; Pentose phosphate pathway; Starch and sucrose metabolism; Amino sugar and nucleotide sugar metabolism; Metabolic pathways; Biosynthesis of secondary metabolites; Carbon metabolism; Biosynthesis of nucleotide sugars	Neutrophil degranulation; Glycolysis; Gluconeogenesis; TP53 Regulates Metabolic Genes		12	100	100	2.832	1.50182	132.6		167.4	Glucose-6-phosphate isomerase	PGI1
High	Master Protein	P34730	Protein BMH2 OS=Saccharomyces cerevisiae (strain ATCC 204508 / S288c) OX=559292 GN=BMH2 PE=1 SV=3	0	89.842	49	13	22	3	273	31	4.88	53.26	13	Pf00244	851676	BMH2	MAPK signaling pathway			1	100	100	0.239	-2.06492	26.3		273.7	Protein BMH2	BMH2
High	Master Protein	P22149	Iron-regulated transcriptional activator AFT1 OS=Saccharomyces cerevisiae (strain ATCC 204508 / S288c) OX=559292 GN=AFT1 PE=1 SV=2	0	11.927	6	3	3	3	690	77.6	6.89	4.27	3	Pf08731	852809	AFT1				0	100	100	4.531	2.17983	210.6		89.4	Iron-regulated transcriptional activator AFT1	AFT1
High	Master Protein	P10964	DNA-directed RNA polymerase I subunit RPA190 OS=Saccharomyces cerevisiae (strain ATCC 204508 / S288c) OX=559292 GN=RPA190 PE=1 SV=2	0	8.105	2	3	4	3	1664	186.3	7.08	5.97	3	Pf00623, Pf04983, Pf04997, Pf04998, Pf05000	854519	RPA190	RNA polymerase	RNA Polymerase I Promoter Escape; RNA Polymerase I Transcription Initiation	Eukaryotic transcription initiation	4	100	100	4.398	2.13685	190.6		109.4	DNA-directed RNA polymerase I subunit RPA190	RPA190
High	Master Protein	Q12464	RuvB-like protein 2 OS=Saccharomyces cerevisiae (strain ATCC 204508 / S288c) OX=559292 GN=RVB2 PE=1 SV=1	0	7.108	6	3	3	3	471	51.6	5.31	2.11	3	Pf06068, Pf17856	855841	RVB2				0	100	100	4.547	2.18492	222		78	RuvB-like protein 2	RVB2
High	Master Protein	P32798	Cobalt uptake protein COT1 OS=Saccharomyces cerevisiae (strain ATCC 204508 / S288c) OX=559292 GN=COT1 PE=1 SV=2	0	16.116	10	2	4	2	439	48.1	6.29	5.46	2	Pf01545	854494	COT1		Metal ion SLC transporters		1	100	100	0.949	-0.07552	146.1		153.9	Cobalt uptake protein COT1	COT1
High	Master Protein	P20436	DNA-directed RNA polymerases I, II, and III subunit RPABC3 OS=Saccharomyces cerevisiae (strain ATCC 204508 / S288c) OX=559292 GN=RPB8 PE=1 SV=1	0	13.762	10	2	3	2	146	16.5	4.7	8.21	2	Pf03870	854399	RPB8	RNA polymerase	Formation of the Early Elongation Complex; RNA Polymerase II Pre-transcription Events; Formation of TC-NER Pre-Incision Complex; Dual incision in TC-NER; Gap-filling DNA repair synthesis and ligation in TC-NER; TP53 Regulates Transcription of DNA Repair Genes; RNA polymerase II transcribes snRNA genes; mRNA Capping; RNA Polymerase II Promoter Escape; RNA Polymerase II Transcription Pre-Initiation…	Eukaryotic transcription initiation	20	100	100	19.833	4.30983	285.6		14.4	DNA-directed RNA polymerases I, II, and III subunit RPABC3	RPB8
High	Master Protein	Q12491	Transposon Ty2-B Gag-Pol polyprotein OS=Saccharomyces cerevisiae (strain ATCC 204508 / S288c) OX=559292 GN=TY2B-B PE=3 SV=1	0	9.374	2	3	3	2	1770	202.1	7.66	4.38	3	Pf00665, Pf01021, Pf07727	852175	TY2B-B				0	100	100	0.472	-1.08314	61.6		238.4	Transposon Ty2-B Gag-Pol polyprotein	TY2B-B
High	Master Protein	P39976	D-2-hydroxyglutarate--pyruvate transhydrogenase DLD3 OS=Saccharomyces cerevisiae (strain ATCC 204508 / S288c) OX=559292 GN=DLD3 PE=1 SV=1	0	8.527	5	2	2	2	496	55.2	6.89	4.79	2	Pf01565, Pf02913	856638	DLD3	Pyruvate metabolism; Metabolic pathways			2	100	100	0.997	-0.00433459	149.8		150.2	D-2-hydroxyglutarate--pyruvate transhydrogenase DLD3	DLD3
High	Master Protein	P05318	60S acidic ribosomal protein P1-alpha OS=Saccharomyces cerevisiae (strain ATCC 204508 / S288c) OX=559292 GN=RPP1A PE=1 SV=4	0	6.049	28	2	2	2	106	10.9	3.88	4.61	2	Pf00428	851478	RPP1A	Ribosome	L13a-mediated translational silencing of Ceruloplasmin expression; SRP-dependent cotranslational protein targeting to membrane; Formation of a pool of free 40S subunits; GTP hydrolysis and joining of the 60S ribosomal subunit; Nonsense Mediated Decay (NMD) independent of the Exon Junction Complex (EJC); Nonsense Mediated Decay (NMD) enhanced by the Exon Junction Complex (EJC)		7	100	100	2.442	1.28806	195.7		104.3	60S acidic ribosomal protein P1-alpha	RPP1A
High	Master Protein	P53834	Hsp90 co-chaperone HCH1 OS=Saccharomyces cerevisiae (strain ATCC 204508 / S288c) OX=559292 GN=HCH1 PE=1 SV=1	0	5.82	12	2	3	2	153	17.2	4.78	2.35	2	Pf09229	855440	HCH1				0	100	100	9.024	3.17377	291.3		8.7	Hsp90 co-chaperone HCH1	HCH1
High	Master Protein	P38555	GTP-binding protein YPT31/YPT8 OS=Saccharomyces cerevisiae (strain ATCC 204508 / S288c) OX=559292 GN=YPT31 PE=1 SV=3	0	3.956	8	2	2	2	223	24.5	5.08	2.04	2	Pf00071	856753	YPT31	Endocytosis	RAB geranylgeranylation		2	100	100	1.675	0.744161	148.1		151.9	GTP-binding protein YPT31/YPT8	YPT31
High	Master Protein	P41811	Coatomer subunit beta' OS=Saccharomyces cerevisiae (strain ATCC 204508 / S288c) OX=559292 GN=SEC27 PE=1 SV=1	0	3.668	2	2	2	2	889	99.4	4.74	2.3	2	Pf00400, Pf04053	852740	SEC27		COPI-mediated anterograde transport; COPI-dependent Golgi-to-ER retrograde traffic		2	100	100	2.529	1.33857	110.1		189.9	Coatomer subunit beta'	SEC27
High	Master Protein	P38754	60S ribosomal protein L14-B OS=Saccharomyces cerevisiae (strain ATCC 204508 / S288c) OX=559292 GN=RPL14B PE=1 SV=1	0	30.314	54	8	11	1	138	15.1	10.93	7.46	8	Pf01929	856388	RPL14B	Ribosome	L13a-mediated translational silencing of Ceruloplasmin expression; SRP-dependent cotranslational protein targeting to membrane; Formation of a pool of free 40S subunits; GTP hydrolysis and joining of the 60S ribosomal subunit; Nonsense Mediated Decay (NMD) independent of the Exon Junction Complex (EJC); Nonsense Mediated Decay (NMD) enhanced by the Exon Junction Complex (EJC)		7	100	100	1.312	0.391768	170.2		129.8	60S ribosomal protein L14-B	RPL14B
High	Master Protein	P40046	Vacuolar transporter chaperone 1 OS=Saccharomyces cerevisiae (strain ATCC 204508 / S288c) OX=559292 GN=VTC1 PE=1 SV=3	0.001	2.436	8	1	1	1	129	14.4	10.52	0	1	Pf02656	856803	VTC1				0	100	100	2.16	1.11103	205		95	Vacuolar transporter chaperone 1	VTC1

## Sheet: WT only (211)
Protein FDR Confidence: Combined	Master	Accession	Description	Exp. q-value: Combined	Sum PEP Score	Coverage [%]	# Peptides	# PSMs	# Unique Peptides	# AAs	MW [kDa]	calc. pI	Score Sequest HT: Sequest HT	# Peptides (by Search Engine): Sequest HT	Pfam IDs	Entrez Gene ID	Gene Symbol	KEGG Pathways	Reactome Pathways	WikiPathways	# Protein Pathway Groups	Abundance Ratio: (2kr) / (Notag)	Abundance Ratio: (WT) / (Notag)	Abundance Ratio: (2kr) / (WT)	2kr/wt log2	Abundances (Grouped): 2kr	Abundances (Grouped): Notag	Abundances (Grouped): WT	Protein name	Gene name
High	Master Protein	P19097	Fatty acid synthase subunit alpha OS=Saccharomyces cerevisiae (strain ATCC 204508 / S288c) OX=559292 GN=FAS2 PE=1 SV=2	0	103.826	19	31	31	31	1887	206.8	5.44	46.11	31	Pf00109, Pf01648, Pf02801, Pf18314, Pf18325	855845	FAS2	Fatty acid biosynthesis; Metabolic pathways; Fatty acid metabolism			3		100	0.01	-6.64386			300	Fatty acid synthase subunit alpha	FAS2
High	Master Protein	P19414	Aconitate hydratase, mitochondrial OS=Saccharomyces cerevisiae (strain ATCC 204508 / S288c) OX=559292 GN=ACO1 PE=1 SV=2	0	57.249	26	16	16	16	778	85.3	8.07	26.23	16	Pf00330, Pf00694	851013	ACO1	Citrate cycle (TCA cycle); Glyoxylate and dicarboxylate metabolism; Metabolic pathways; Biosynthesis of secondary metabolites; Carbon metabolism; 2-Oxocarboxylic acid metabolism; Biosynthesis of amino acids	Citric acid cycle (TCA cycle)		8		100	0.01	-6.64386			300	Aconitate hydratase, mitochondrial	ACO1
High	Master Protein	P48570	Homocitrate synthase, cytosolic isozyme OS=Saccharomyces cerevisiae (strain ATCC 204508 / S288c) OX=559292 GN=LYS20 PE=1 SV=1	0	70.367	51	15	16	15	428	47.1	7.27	29.41	15	Pf00682	851346	LYS20	Lysine biosynthesis; Pyruvate metabolism; Metabolic pathways; Biosynthesis of secondary metabolites; 2-Oxocarboxylic acid metabolism; Biosynthesis of amino acids			6		100	0.01	-6.64386			300	Homocitrate synthase, cytosolic isozyme	LYS20
High	Master Protein	P25694	Cell division control protein 48 OS=Saccharomyces cerevisiae (strain ATCC 204508 / S288c) OX=559292 GN=CDC48 PE=1 SV=3	0	62.648	27	14	17	14	835	91.9	4.94	26.99	14	Pf00004, Pf02359, Pf02933, Pf09336, Pf17862	851431	CDC48	Protein processing in endoplasmic reticulum	Neddylation; Neutrophil degranulation; HSF1 activation; Ovarian tumor domain proteases; KEAP1-NFE2L2 pathway		6		100	0.01	-6.64386			300	Cell division control protein 48	CDC48
High	Master Protein	P00817	Inorganic pyrophosphatase OS=Saccharomyces cerevisiae (strain ATCC 204508 / S288c) OX=559292 GN=IPP1 PE=1 SV=4	0	76.421	54	13	15	13	287	32.3	5.58	30.31	13	Pf00719	852296	IPP1	Oxidative phosphorylation	Cytosolic tRNA aminoacylation; Mitochondrial tRNA aminoacylation; Pyrophosphate hydrolysis		4		100	0.01	-6.64386			300	Inorganic pyrophosphatase	IPP1
High	Master Protein	P07251	ATP synthase subunit alpha, mitochondrial OS=Saccharomyces cerevisiae (strain ATCC 204508 / S288c) OX=559292 GN=ATP1 PE=1 SV=5	0	48.728	25	13	13	13	545	58.6	9.04	23.12	13	Pf00006, Pf00306, Pf02874	852177	ATP1	Oxidative phosphorylation; Metabolic pathways			2		100	0.01	-6.64386			300	ATP synthase subunit alpha, mitochondrial	ATP1
High	Master Protein	P04456	60S ribosomal protein L25 OS=Saccharomyces cerevisiae (strain ATCC 204508 / S288c) OX=559292 GN=RPL25 PE=1 SV=4	0	47.368	63	12	14	12	142	15.7	10.11	18.98	12	Pf00276, Pf03939	853993	RPL25	Ribosome	L13a-mediated translational silencing of Ceruloplasmin expression; SRP-dependent cotranslational protein targeting to membrane; Formation of a pool of free 40S subunits; GTP hydrolysis and joining of the 60S ribosomal subunit; Nonsense Mediated Decay (NMD) independent of the Exon Junction Complex (EJC); Nonsense Mediated Decay (NMD) enhanced by the Exon Junction Complex (EJC)		7		100	0.01	-6.64386			300	60S ribosomal protein L25	RPL25
High	Master Protein	Q04894	NADP-dependent alcohol dehydrogenase 6 OS=Saccharomyces cerevisiae (strain ATCC 204508 / S288c) OX=559292 GN=ADH6 PE=1 SV=1	0	59.742	45	11	14	11	360	39.6	6.74	22.59	11	Pf00107, Pf08240	855368	ADH6	Glycolysis / Gluconeogenesis; Pentose and glucuronate interconversions; Ascorbate and aldarate metabolism; Glycerolipid metabolism; Pyruvate metabolism; Metabolic pathways; Biosynthesis of secondary metabolites; Biosynthesis of cofactors			8		100	0.01	-6.64386			300	NADP-dependent alcohol dehydrogenase 6	ADH6
High	Master Protein	P04801	Threonine--tRNA ligase, cytoplasmic OS=Saccharomyces cerevisiae (strain ATCC 204508 / S288c) OX=559292 GN=THS1 PE=1 SV=2	0	24.55	18	11	11	11	734	84.5	7.03	9.07	11	Pf00587, Pf02824, Pf03129, Pf07973	854732	THS1	Aminoacyl-tRNA biosynthesis			1		100	0.01	-6.64386			300	Threonine--tRNA ligase, cytoplasmic	THS1
High	Master Protein	P38791	Deoxyhypusine synthase OS=Saccharomyces cerevisiae (strain ATCC 204508 / S288c) OX=559292 GN=DYS1 PE=1 SV=1	0	47.817	35	10	12	10	387	42.9	5.77	24.77	10	Pf01916	856465	DYS1		Hypusine synthesis from eIF5A-lysine		1		100	0.01	-6.64386			300	Deoxyhypusine synthase	DYS1
High	Master Protein	P05694	5-methyltetrahydropteroyltriglutamate--homocysteine methyltransferase OS=Saccharomyces cerevisiae (strain ATCC 204508 / S288c) OX=559292 GN=MET6 PE=1 SV=4	0	44.996	19	10	11	10	767	85.8	6.47	17.55	10	Pf01717, Pf08267	856825	MET6	Cysteine and methionine metabolism; Selenocompound metabolism; Metabolic pathways; Biosynthesis of secondary metabolites; Biosynthesis of amino acids			5		100	0.01	-6.64386			300	5-methyltetrahydropteroyltriglutamate--homocysteine methyltransferase	MET6
High	Master Protein	P00360	Glyceraldehyde-3-phosphate dehydrogenase 1 OS=Saccharomyces cerevisiae (strain ATCC 204508 / S288c) OX=559292 GN=TDH1 PE=1 SV=3	0	192.166	70	19	49	9	332	35.7	8.28	97.98	19	Pf00044, Pf02800	853395	TDH1	Glycolysis / Gluconeogenesis; Metabolic pathways; Biosynthesis of secondary metabolites; Carbon metabolism; Biosynthesis of amino acids	Glycolysis; Gluconeogenesis		7		100	0.01	-6.64386			300	Glyceraldehyde-3-phosphate dehydrogenase 1	TDH1
High	Master Protein	P38777	Family of serine hydrolases 1 OS=Saccharomyces cerevisiae (strain ATCC 204508 / S288c) OX=559292 GN=FSH1 PE=1 SV=1	0	46.75	56	9	10	9	243	27.3	6.35	14.16	9	Pf03959	856445	FSH1				0		100	0.01	-6.64386			300	Family of serine hydrolases 1	FSH1
High	Master Protein	P06208	2-isopropylmalate synthase OS=Saccharomyces cerevisiae (strain ATCC 204508 / S288c) OX=559292 GN=LEU4 PE=1 SV=1	0	36.1	20	9	10	9	619	68.4	6.01	18.74	9	Pf00682, Pf08502	855619	LEU4	Valine, leucine and isoleucine biosynthesis; Pyruvate metabolism; Metabolic pathways; Biosynthesis of secondary metabolites; 2-Oxocarboxylic acid metabolism; Biosynthesis of amino acids			6		100	0.01	-6.64386			300	2-isopropylmalate synthase	LEU4
High	Master Protein	Q07478	ATP-dependent RNA helicase SUB2 OS=Saccharomyces cerevisiae (strain ATCC 204508 / S288c) OX=559292 GN=SUB2 PE=1 SV=1	0	47.651	32	8	9	8	446	50.3	5.52	12.36	8	Pf00270, Pf00271	851475	SUB2	Nucleocytoplasmic transport; mRNA surveillance pathway; Spliceosome	RHOBTB2 GTPase cycle		4		100	0.01	-6.64386			300	ATP-dependent RNA helicase SUB2	SUB2
High	Master Protein	P07245	C-1-tetrahydrofolate synthase, cytoplasmic OS=Saccharomyces cerevisiae (strain ATCC 204508 / S288c) OX=559292 GN=ADE3 PE=1 SV=1	0	29.046	12	8	8	8	946	102.1	6.84	11.12	8	Pf00763, Pf01268, Pf02882	853118	ADE3	One carbon pool by folate; Metabolic pathways; Biosynthesis of cofactors	Metabolism of folate and pterines		4		100	0.01	-6.64386			300	C-1-tetrahydrofolate synthase, cytoplasmic	ADE3
High	Master Protein	Q12080	Ribosome biogenesis protein NOP53 OS=Saccharomyces cerevisiae (strain ATCC 204508 / S288c) OX=559292 GN=NOP53 PE=1 SV=1	0	26.344	21	8	8	8	455	52.5	9.35	15.51	8	Pf07767	855957	NOP53				0		100	0.01	-6.64386			300	Ribosome biogenesis protein NOP53	NOP53
High	Master Protein	P53912	Uncharacterized protein YNL134C OS=Saccharomyces cerevisiae (strain ATCC 204508 / S288c) OX=559292 GN=YNL134C PE=1 SV=1	0	37.649	37	7	7	7	376	41.1	6.21	13.23	7	Pf00107	855588					0		100	0.01	-6.64386			300	Uncharacterized protein YNL134C	YNL134C
High	Master Protein	P37303	Low specificity L-threonine aldolase OS=Saccharomyces cerevisiae (strain ATCC 204508 / S288c) OX=559292 GN=GLY1 PE=1 SV=2	0	33.311	25	7	8	7	387	42.8	6.29	9.8	7	Pf01212	856665	GLY1	Glycine, serine and threonine metabolism; Metabolic pathways; Biosynthesis of secondary metabolites; Biosynthesis of amino acids			4		100	0.01	-6.64386			300	Low specificity L-threonine aldolase	GLY1
High	Master Protein	P21954	Isocitrate dehydrogenase [NADP], mitochondrial OS=Saccharomyces cerevisiae (strain ATCC 204508 / S288c) OX=559292 GN=IDP1 PE=1 SV=1	0	30.302	21	7	7	7	428	48.2	8.76	10.05	7	Pf00180	851493	IDP1	Citrate cycle (TCA cycle); Glutathione metabolism; Metabolic pathways; Biosynthesis of secondary metabolites; Carbon metabolism; 2-Oxocarboxylic acid metabolism; Biosynthesis of amino acids; Peroxisome	Neutrophil degranulation; Peroxisomal protein import; NADPH regeneration		11		100	0.01	-6.64386			300	Isocitrate dehydrogenase [NADP], mitochondrial	IDP1
High	Master Protein	P25441	DNA-directed RNA polymerase III subunit RPC4 OS=Saccharomyces cerevisiae (strain ATCC 204508 / S288c) OX=559292 GN=RPC53 PE=1 SV=2	0	24.018	24	7	7	7	422	46.6	8.63	8.99	7	Pf05132	851404	RPC53	RNA polymerase	RNA Polymerase III Transcription Initiation From Type 1 Promoter; RNA Polymerase III Transcription Initiation From Type 2 Promoter		3		100	0.01	-6.64386			300	DNA-directed RNA polymerase III subunit RPC4	RPC53
High	Master Protein	P07342	Acetolactate synthase catalytic subunit, mitochondrial OS=Saccharomyces cerevisiae (strain ATCC 204508 / S288c) OX=559292 GN=ILV2 PE=1 SV=1	0	23.625	13	7	7	7	687	74.9	8.51	17.04	7	Pf00205, Pf02775, Pf02776	855135	ILV2	Valine, leucine and isoleucine biosynthesis; Butanoate metabolism; C5-Branched dibasic acid metabolism; Pantothenate and CoA biosynthesis; Metabolic pathways; Biosynthesis of secondary metabolites; 2-Oxocarboxylic acid metabolism; Biosynthesis of amino acids			8		100	0.01	-6.64386			300	Acetolactate synthase catalytic subunit, mitochondrial	ILV2
High	Master Protein	P32527	Zuotin OS=Saccharomyces cerevisiae (strain ATCC 204508 / S288c) OX=559292 GN=ZUO1 PE=1 SV=1	0	21.364	25	7	8	7	433	49	8.25	11.1	7	Pf00226, Pf16717	853202	ZUO1				0		100	0.01	-6.64386			300	Zuotin	ZUO1
High	Master Protein	P40217	Eukaryotic translation initiation factor 3 subunit I OS=Saccharomyces cerevisiae (strain ATCC 204508 / S288c) OX=559292 GN=TIF34 PE=1 SV=1	0	19.351	33	7	7	7	347	38.7	5.67	12.15	7	Pf00400	855177	TIF34		L13a-mediated translational silencing of Ceruloplasmin expression; Translation initiation complex formation; Formation of the ternary complex, and subsequently, the 43S complex; Ribosomal scanning and start codon recognition		4		100	0.01	-6.64386			300	Eukaryotic translation initiation factor 3 subunit I	TIF34
High	Master Protein	P27692	Transcription elongation factor SPT5 OS=Saccharomyces cerevisiae (strain ATCC 204508 / S288c) OX=559292 GN=SPT5 PE=1 SV=1	0	16.868	9	7	7	7	1063	115.6	5.25	2.59	7	Pf03439, Pf11942, Pf12815	854999	SPT5	Viral life cycle	Formation of the Early Elongation Complex; RNA Polymerase II Pre-transcription Events; TP53 Regulates Transcription of DNA Repair Genes; mRNA Capping; RNA Pol II CTD phosphorylation and interaction with CE		6		100	0.01	-6.64386			300	Transcription elongation factor SPT5	SPT5
High	Master Protein	P17555	Adenylyl cyclase-associated protein OS=Saccharomyces cerevisiae (strain ATCC 204508 / S288c) OX=559292 GN=SRV2 PE=1 SV=1	0	15.696	21	7	7	7	526	57.5	5.64	7.63	7	Pf01213, Pf08603	855584	SRV2		Neutrophil degranulation		1		100	0.01	-6.64386			300	Adenylyl cyclase-associated protein	SRV2
High	Master Protein	Q03218	Mitochondrial metal transporter 1 OS=Saccharomyces cerevisiae (strain ATCC 204508 / S288c) OX=559292 GN=MMT1 PE=1 SV=1	0	38.477	10	6	7	6	510	56.2	7.09	19.1	6	Pf01545	855215	MMT1				0		100	0.01	-6.64386			300	Mitochondrial metal transporter 1	MMT1
High	Master Protein	P38174	Methionine aminopeptidase 2 OS=Saccharomyces cerevisiae (strain ATCC 204508 / S288c) OX=559292 GN=MAP2 PE=1 SV=4	0	23.024	17	6	6	6	421	47.5	6.24	11.89	6	Pf00557	852187	MAP2		Inactivation, recovery and regulation of the phototransduction cascade		1		100	0.01	-6.64386			300	Methionine aminopeptidase 2	MAP2
High	Master Protein	P15624	Phenylalanine--tRNA ligase beta subunit OS=Saccharomyces cerevisiae (strain ATCC 204508 / S288c) OX=559292 GN=FRS1 PE=1 SV=3	0	17.05	15	6	6	6	595	67.3	5.78	5.82	6	Pf03483, Pf03484, Pf17759, Pf18262	850749	FRS1	Aminoacyl-tRNA biosynthesis			1		100	0.01	-6.64386			300	Phenylalanine--tRNA ligase beta subunit	FRS1
High	Master Protein	P43616	Cys-Gly metallodipeptidase DUG1 OS=Saccharomyces cerevisiae (strain ATCC 204508 / S288c) OX=559292 GN=DUG1 PE=1 SV=1	0	16.493	17	6	6	6	481	52.8	5.67	6.06	6	Pf01546, Pf07687	850605	DUG1	Glutathione metabolism; Metabolic pathways	Paracetamol ADME; Glutathione synthesis and recycling		4		100	0.01	-6.64386			300	Cys-Gly metallodipeptidase DUG1	DUG1
High	Master Protein	P13188	Glutamine--tRNA ligase OS=Saccharomyces cerevisiae (strain ATCC 204508 / S288c) OX=559292 GN=GLN4 PE=1 SV=2	0	12.084	10	6	6	6	809	93.1	8.41	0	6	Pf00749, Pf03950, Pf04557, Pf04558	854339	GLN4	Aminoacyl-tRNA biosynthesis; Metabolic pathways			2		100	0.01	-6.64386			300	Glutamine--tRNA ligase	GLN4
High	Master Protein	P11076	ADP-ribosylation factor 1 OS=Saccharomyces cerevisiae (strain ATCC 204508 / S288c) OX=559292 GN=ARF1 PE=1 SV=3	0	56.893	57	12	16	5	181	20.5	7.34	28.72	12	Pf00025	851335	ARF1	Endocytosis	COPI-mediated anterograde transport; COPI-dependent Golgi-to-ER retrograde traffic; Synthesis of PIPs at the Golgi membrane; trans-Golgi Network Vesicle Budding; VxPx cargo-targeting to cilium; Intra-Golgi traffic		7	1.868	0.91	2.054	1.03844	132	40	128	ADP-ribosylation factor 1	ARF1
High	Master Protein	P53958	Protein BOP3 OS=Saccharomyces cerevisiae (strain ATCC 204508 / S288c) OX=559292 GN=BOP3 PE=1 SV=1	0	56.397	23	5	8	5	396	43.7	9.72	25.88	5	Pf10846	855686	BOP3				0		100	0.01	-6.64386			300	Protein BOP3	BOP3
High	Master Protein	Q02642	Nascent polypeptide-associated complex subunit beta-1 OS=Saccharomyces cerevisiae (strain ATCC 204508 / S288c) OX=559292 GN=EGD1 PE=1 SV=2	0	30.3	51	5	6	5	157	17	6.55	13.14	5	Pf01849	856070	EGD1				0		100	0.01	-6.64386			300	Nascent polypeptide-associated complex subunit beta-1	EGD1
High	Master Protein	P14164	ARS-binding factor 1 OS=Saccharomyces cerevisiae (strain ATCC 204508 / S288c) OX=559292 GN=ABF1 PE=1 SV=4	0	24.837	11	5	5	5	731	81.7	5.07	11.56	5	Pf04684	853748	ABF1				0		100	0.01	-6.64386			300	ARS-binding factor 1	ABF1
High	Master Protein	P15992	Heat shock protein 26 OS=Saccharomyces cerevisiae (strain ATCC 204508 / S288c) OX=559292 GN=HSP26 PE=1 SV=3	0	24.26	36	5	5	5	214	23.9	5.53	11.35	5	Pf00011	852364	HSP26	Protein processing in endoplasmic reticulum			1		100	0.01	-6.64386			300	Heat shock protein 26	HSP26
High	Master Protein	P12695	Dihydrolipoyllysine-residue acetyltransferase component of pyruvate dehydrogenase complex, mitochondrial OS=Saccharomyces cerevisiae (strain ATCC 204508 / S288c) OX=559292 GN=LAT1 PE=1 SV=1	0	21.1	13	5	6	5	482	51.8	7.8	7.64	5	Pf00198, Pf00364, Pf02817	855653	LAT1	Glycolysis / Gluconeogenesis; Citrate cycle (TCA cycle); Pyruvate metabolism; Metabolic pathways; Biosynthesis of secondary metabolites; Carbon metabolism	Pyruvate metabolism; Glyoxylate metabolism and glycine degradation		8		100	0.01	-6.64386			300	Dihydrolipoyllysine-residue acetyltransferase component of pyruvate dehydrogenase complex, mitochondrial	LAT1
High	Master Protein	P39676	Flavohemoprotein OS=Saccharomyces cerevisiae (strain ATCC 204508 / S288c) OX=559292 GN=YHB1 PE=1 SV=2	0	19.111	18	5	5	5	399	44.6	6.28	7.94	5	Pf00042, Pf00970	853149	YHB1				0		100	0.01	-6.64386			300	Flavohemoprotein	YHB1
High	Master Protein	P31412	V-type proton ATPase subunit C OS=Saccharomyces cerevisiae (strain ATCC 204508 / S288c) OX=559292 GN=VMA5 PE=1 SV=4	0	17.483	17	5	5	5	392	44.2	6.67	8.85	5	Pf03223	853782	VMA5	Oxidative phosphorylation; Metabolic pathways; Phagosome	ROS and RNS production in phagocytes; Insulin receptor recycling; Transferrin endocytosis and recycling; Amino acids regulate mTORC1		7		100	0.01	-6.64386			300	V-type proton ATPase subunit C	VMA5
High	Master Protein	Q04344	Adenosine 5'-monophosphoramidase HNT1 OS=Saccharomyces cerevisiae (strain ATCC 204508 / S288c) OX=559292 GN=HNT1 PE=1 SV=2	0	17.414	43	5	5	5	158	17.7	6.95	4.47	5	Pf01230	851432	HNT1				0		100	0.01	-6.64386			300	Adenosine 5'-monophosphoramidase HNT1	HNT1
High	Master Protein	P09938	Ribonucleoside-diphosphate reductase small chain 1 OS=Saccharomyces cerevisiae (strain ATCC 204508 / S288c) OX=559292 GN=RNR2 PE=1 SV=2	0	17.084	15	5	5	5	399	46.1	5.25	6.68	5	Pf00268	853427	RNR2	Purine metabolism; Pyrimidine metabolism; Glutathione metabolism; Metabolic pathways; Nucleotide metabolism			5		100	0.01	-6.64386			300	Ribonucleoside-diphosphate reductase small chain 1	RNR2
High	Master Protein	Q06252	Uncharacterized protein YLR179C OS=Saccharomyces cerevisiae (strain ATCC 204508 / S288c) OX=559292 GN=YLR179C PE=1 SV=1	0	16.93	37	5	5	5	201	22.1	4.94	5.38	5	Pf01161	850876					0		100	0.01	-6.64386			300	Uncharacterized protein YLR179C	YLR179C
High	Master Protein	P43588	Ubiquitin carboxyl-terminal hydrolase RPN11 OS=Saccharomyces cerevisiae (strain ATCC 204508 / S288c) OX=559292 GN=RPN11 PE=1 SV=1	0	16.516	20	5	5	5	306	34.4	6.19	6.9	5	Pf01398, Pf13012	850554	RPN11	Proteasome	Neutrophil degranulation; Cross-presentation of soluble exogenous antigens (endosomes); TNFR2 non-canonical NF-kB pathway; Ub-specific processing proteases		5		100	0.01	-6.64386			300	Ubiquitin carboxyl-terminal hydrolase RPN11	RPN11
High	Master Protein	P40495	Homoisocitrate dehydrogenase, mitochondrial OS=Saccharomyces cerevisiae (strain ATCC 204508 / S288c) OX=559292 GN=LYS12 PE=1 SV=1	0	16.222	18	5	5	5	371	40	8.02	7.59	5	Pf00180	854714	LYS12	Lysine biosynthesis; Metabolic pathways; Biosynthesis of secondary metabolites; 2-Oxocarboxylic acid metabolism; Biosynthesis of amino acids			5		100	0.01	-6.64386			300	Homoisocitrate dehydrogenase, mitochondrial	LYS12
High	Master Protein	P40010	Nuclear GTP-binding protein NUG1 OS=Saccharomyces cerevisiae (strain ATCC 204508 / S288c) OX=559292 GN=NUG1 PE=1 SV=1	0	14.835	11	5	5	5	520	57.7	8.88	7.81	5	Pf01926, Pf08701	856723	NUG1	Ribosome biogenesis in eukaryotes	Major pathway of rRNA processing in the nucleolus and cytosol		2				#VALUE!				Nuclear GTP-binding protein NUG1	NUG1
High	Master Protein	P53691	Peptidyl-prolyl cis-trans isomerase CPR6 OS=Saccharomyces cerevisiae (strain ATCC 204508 / S288c) OX=559292 GN=CPR6 PE=1 SV=1	0	14.199	18	5	5	5	371	42	6.16	6.24	5	Pf00160	850914	CPR6		Dual incision in TC-NER; Gap-filling DNA repair synthesis and ligation in TC-NER; Neutrophil degranulation		3		100	0.01	-6.64386			300	Peptidyl-prolyl cis-trans isomerase CPR6	CPR6
High	Master Protein	P06103	Eukaryotic translation initiation factor 3 subunit B OS=Saccharomyces cerevisiae (strain ATCC 204508 / S288c) OX=559292 GN=PRT1 PE=1 SV=1	0	12.247	8	5	5	5	763	88.1	6.01	2.47	5	Pf00076, Pf08662	854543	PRT1		L13a-mediated translational silencing of Ceruloplasmin expression; Translation initiation complex formation; Formation of the ternary complex, and subsequently, the 43S complex; Ribosomal scanning and start codon recognition		4		100	0.01	-6.64386			300	Eukaryotic translation initiation factor 3 subunit B	PRT1
High	Master Protein	Q08970	Mitochondrial metal transporter 2 OS=Saccharomyces cerevisiae (strain ATCC 204508 / S288c) OX=559292 GN=MMT2 PE=3 SV=2	0	11.826	15	5	5	5	484	52.4	7.64	0	5	Pf01545	855877	MMT2				0		100	0.01	-6.64386			300	Mitochondrial metal transporter 2	MMT2
High	Master Protein	P00815	Histidine biosynthesis trifunctional protein OS=Saccharomyces cerevisiae (strain ATCC 204508 / S288c) OX=559292 GN=HIS4 PE=1 SV=3	0	10.872	10	5	5	5	799	87.7	5.29	2.37	5	Pf00815, Pf01502, Pf01503	850327	HIS4	Histidine metabolism; Metabolic pathways; Biosynthesis of secondary metabolites; Biosynthesis of amino acids			4		100	0.01	-6.64386			300	Histidine biosynthesis trifunctional protein	HIS4
High	Master Protein	P32565	26S proteasome regulatory subunit RPN2 OS=Saccharomyces cerevisiae (strain ATCC 204508 / S288c) OX=559292 GN=RPN2 PE=1 SV=4	0	10.484	7	5	5	5	945	104.2	6.18	1.71	5	Pf01851, Pf13646, Pf18004	854735	RPN2	Proteasome	Neutrophil degranulation; Cross-presentation of soluble exogenous antigens (endosomes); TNFR2 non-canonical NF-kB pathway; Ub-specific processing proteases	Proteasome degradation	6				#VALUE!				26S proteasome regulatory subunit RPN2	RPN2
High	Master Protein	P00498	ATP phosphoribosyltransferase OS=Saccharomyces cerevisiae (strain ATCC 204508 / S288c) OX=559292 GN=HIS1 PE=1 SV=1	0	9.859	21	5	5	5	297	32.2	6.15	0	5	Pf01634, Pf08029	856782	HIS1	Histidine metabolism; Metabolic pathways; Biosynthesis of secondary metabolites; Biosynthesis of amino acids			4		100	0.01	-6.64386			300	ATP phosphoribosyltransferase	HIS1
High	Master Protein	P15625	Phenylalanine--tRNA ligase alpha subunit OS=Saccharomyces cerevisiae (strain ATCC 204508 / S288c) OX=559292 GN=FRS2 PE=1 SV=3	0	8.725	18	5	5	5	503	57.5	5.78	1.95	5	Pf01409, Pf18553, Pf18554	850522	FRS2	Aminoacyl-tRNA biosynthesis			1		100	0.01	-6.64386			300	Phenylalanine--tRNA ligase alpha subunit	FRS2
High	Master Protein	P05759	Ubiquitin-40S ribosomal protein S31 OS=Saccharomyces cerevisiae (strain ATCC 204508 / S288c) OX=559292 GN=RPS31 PE=1 SV=3	0	34.573	28	6	7	4	152	17.2	9.86	15.07	6	Pf00240, Pf01599	850864	RPS31	Ribosome; Ubiquitin mediated proteolysis			2		100	0.01	-6.64386			300	Ubiquitin-40S ribosomal protein S31	RPS31
High	Master Protein	P41920	Ran-specific GTPase-activating protein 1 OS=Saccharomyces cerevisiae (strain ATCC 204508 / S288c) OX=559292 GN=YRB1 PE=1 SV=1	0	20.383	27	4	5	4	201	22.9	6.1	5.02	4	Pf00638	851565	YRB1				0		100	0.01	-6.64386			300	Ran-specific GTPase-activating protein 1	YRB1
High	Master Protein	P53852	Cysteine--tRNA ligase OS=Saccharomyces cerevisiae (strain ATCC 204508 / S288c) OX=559292 GN=YNL247W PE=1 SV=1	0	19.293	6	4	4	4	767	87.5	6.86	10.25	4	Pf01406	855474		Aminoacyl-tRNA biosynthesis			1		100	0.01	-6.64386			300	Cysteine--tRNA ligase	YNL247W
High	Master Protein	P39730	Eukaryotic translation initiation factor 5B OS=Saccharomyces cerevisiae (strain ATCC 204508 / S288c) OX=559292 GN=FUN12 PE=1 SV=2	0	17.723	6	4	4	4	1002	112.2	5.76	6.23	4	Pf00009, Pf03144, Pf11987	851196	FUN12		GTP hydrolysis and joining of the 60S ribosomal subunit		1		100	0.01	-6.64386			300	Eukaryotic translation initiation factor 5B	FUN12
High	Master Protein	P00958	Methionine--tRNA ligase, cytoplasmic OS=Saccharomyces cerevisiae (strain ATCC 204508 / S288c) OX=559292 GN=MES1 PE=1 SV=4	0	16.642	7	4	4	4	751	85.6	6.61	5.25	4	Pf09334, Pf09635, Pf19303	853181	MES1	Selenocompound metabolism; Aminoacyl-tRNA biosynthesis; Metabolic pathways			3		100	0.01	-6.64386			300	Methionine--tRNA ligase, cytoplasmic	MES1
High	Master Protein	P38858	6-phosphogluconolactonase 3 OS=Saccharomyces cerevisiae (strain ATCC 204508 / S288c) OX=559292 GN=SOL3 PE=1 SV=2	0	13.97	15	4	4	4	249	27.8	5.5	5.4	4	Pf01182	856568	SOL3	Pentose phosphate pathway; Metabolic pathways; Biosynthesis of secondary metabolites; Carbon metabolism	Pentose phosphate pathway		5		100	0.01	-6.64386			300	6-phosphogluconolactonase 3	SOL3
High	Master Protein	Q12314	Protein arginine N-methyltransferase SFM1 OS=Saccharomyces cerevisiae (strain ATCC 204508 / S288c) OX=559292 GN=SFM1 PE=1 SV=1	0	13.958	27	4	4	4	213	24.7	5.07	2.66	4	Pf04252	854186	SFM1				0		100	0.01	-6.64386			300	Protein arginine N-methyltransferase SFM1	SFM1
High	Master Protein	Q05911	Adenylosuccinate lyase OS=Saccharomyces cerevisiae (strain ATCC 204508 / S288c) OX=559292 GN=ADE13 PE=1 SV=1	0	13.814	12	4	5	4	482	54.5	6.43	4.23	4	Pf00206, Pf10397	851073	ADE13	Purine metabolism; Alanine, aspartate and glutamate metabolism; Metabolic pathways; Biosynthesis of secondary metabolites; Nucleotide metabolism; Biosynthesis of cofactors	Purine ribonucleoside monophosphate biosynthesis	Nucleotide metabolism	8		100	0.01	-6.64386			300	Adenylosuccinate lyase	ADE13
High	Master Protein	P41338	Acetyl-CoA acetyltransferase OS=Saccharomyces cerevisiae (strain ATCC 204508 / S288c) OX=559292 GN=ERG10 PE=1 SV=3	0	13.641	16	4	4	4	398	41.7	7.39	7.24	4	Pf00108, Pf02803	856079	ERG10	Fatty acid degradation; Valine, leucine and isoleucine degradation; Lysine degradation; Tryptophan metabolism; Pyruvate metabolism; Glyoxylate and dicarboxylate metabolism; Butanoate metabolism; Terpenoid backbone biosynthesis; Metabolic pathways; Biosynthesis of secondary metabolites; Carbon metabolism; Fatty acid metabolism			12		100	0.01	-6.64386			300	Acetyl-CoA acetyltransferase	ERG10
High	Master Protein	P29547	Elongation factor 1-gamma 1 OS=Saccharomyces cerevisiae (strain ATCC 204508 / S288c) OX=559292 GN=CAM1 PE=1 SV=2	0	13.575	18	6	6	4	415	47.1	8.38	2.21	6	Pf00043, Pf00647, Pf02798	856059	CAM1		Eukaryotic Translation Elongation		1				#VALUE!				Elongation factor 1-gamma 1	CAM1
High	Master Protein	P32457	Cell division control protein 3 OS=Saccharomyces cerevisiae (strain ATCC 204508 / S288c) OX=559292 GN=CDC3 PE=1 SV=3	0	12.516	11	4	5	4	520	60	5.48	1.74	4	Pf00735	851024	CDC3				0		100	0.01	-6.64386			300	Cell division control protein 3	CDC3
High	Master Protein	P18562	Uracil phosphoribosyltransferase OS=Saccharomyces cerevisiae (strain ATCC 204508 / S288c) OX=559292 GN=FUR1 PE=1 SV=2	0	11.553	23	4	4	4	216	24.6	5.74	1.91	4	Pf14681	856529	FUR1	Pyrimidine metabolism; Metabolic pathways; Nucleotide metabolism			3		100	0.01	-6.64386			300	Uracil phosphoribosyltransferase	FUR1
High	Master Protein	P40531	Protein GVP36 OS=Saccharomyces cerevisiae (strain ATCC 204508 / S288c) OX=559292 GN=GVP36 PE=1 SV=1	0	8.177	22	4	4	4	326	36.6	4.97	0	4	Pf10455	854770	GVP36				0				#VALUE!				Protein GVP36	GVP36
High	Master Protein	P08524	Farnesyl pyrophosphate synthase OS=Saccharomyces cerevisiae (strain ATCC 204508 / S288c) OX=559292 GN=ERG20 PE=1 SV=2	0	6.996	13	4	4	4	352	40.5	5.47	1.79	4	Pf00348	853272	ERG20	Terpenoid backbone biosynthesis; Metabolic pathways; Biosynthesis of secondary metabolites	Cholesterol biosynthesis	Cholesterol biosynthesis	5		100	0.01	-6.64386			300	Farnesyl pyrophosphate synthase	ERG20
High	Master Protein	P17076	60S ribosomal protein L8-A OS=Saccharomyces cerevisiae (strain ATCC 204508 / S288c) OX=559292 GN=RPL8A PE=1 SV=4	0	130.741	71	20	32	3	256	28.1	10.04	86.63	20	Pf01248	856352	RPL8A	Ribosome			1		100	0.01	-6.64386			300	60S ribosomal protein L8-A	RPL8A
High	Master Protein	Q03964	Transposon Ty1-DR2 Gag polyprotein OS=Saccharomyces cerevisiae (strain ATCC 204508 / S288c) OX=559292 GN=TY1A-DR2 PE=3 SV=1	0	23.008	18	6	8	3	440	49.4	8.35	12.09	6	Pf01021	851750	TY1A-DR2				0				#VALUE!				Transposon Ty1-DR2 Gag polyprotein	TY1A-DR2
High	Master Protein	Q03048	Cofilin OS=Saccharomyces cerevisiae (strain ATCC 204508 / S288c) OX=559292 GN=COF1 PE=1 SV=1	0	20.39	29	3	3	3	143	15.9	5.2	9.51	3	Pf00241	850676	COF1				0		100	0.01	-6.64386			300	Cofilin	COF1
High	Master Protein	P50109	Protein PSP2 OS=Saccharomyces cerevisiae (strain ATCC 204508 / S288c) OX=559292 GN=PSP2 PE=1 SV=2	0	17.466	8	3	3	3	593	65.5	8.73	7.59	3		854991	PSP2		Major pathway of rRNA processing in the nucleolus and cytosol		1		100	0.01	-6.64386			300	Protein PSP2	PSP2
High	Master Protein	P17423	Homoserine kinase OS=Saccharomyces cerevisiae (strain ATCC 204508 / S288c) OX=559292 GN=THR1 PE=1 SV=4	0	16.939	16	3	3	3	357	38.7	5.41	6.96	3	Pf00288	856420	THR1	Glycine, serine and threonine metabolism; Metabolic pathways; Biosynthesis of secondary metabolites; Biosynthesis of amino acids			4		100	0.01	-6.64386			300	Homoserine kinase	THR1
High	Master Protein	P25087	Sterol 24-C-methyltransferase ERG6 OS=Saccharomyces cerevisiae (strain ATCC 204508 / S288c) OX=559292 GN=ERG6 PE=1 SV=4	0	14.969	10	3	4	3	383	43.4	5.77	8.75	3	Pf08241, Pf08498	855003	ERG6	Steroid biosynthesis; Metabolic pathways; Biosynthesis of secondary metabolites			3		100	0.01	-6.64386			300	Sterol 24-C-methyltransferase ERG6	ERG6
High	Master Protein	P25374	Cysteine desulfurase, mitochondrial OS=Saccharomyces cerevisiae (strain ATCC 204508 / S288c) OX=559292 GN=NFS1 PE=1 SV=2	0	14.87	8	3	3	3	497	54.4	8.19	8.79	3	Pf00266	850343	NFS1	Thiamine metabolism; Metabolic pathways; Biosynthesis of cofactors; Sulfur relay system	Mitochondrial iron-sulfur cluster biogenesis; Molybdenum cofactor biosynthesis		6		100	0.01	-6.64386			300	Cysteine desulfurase, mitochondrial	NFS1
High	Master Protein	P25293	Nucleosome assembly protein OS=Saccharomyces cerevisiae (strain ATCC 204508 / S288c) OX=559292 GN=NAP1 PE=1 SV=2	0	14.816	14	3	3	3	417	47.9	4.34	3.88	3	Pf00956	853922	NAP1				0		100	0.01	-6.64386			300	Nucleosome assembly protein	NAP1
High	Master Protein	P02557	Tubulin beta chain OS=Saccharomyces cerevisiae (strain ATCC 204508 / S288c) OX=559292 GN=TUB2 PE=1 SV=2	0	14.18	11	3	3	3	457	50.9	4.75	5.15	3	Pf00091, Pf03953	850506	TUB2	Phagosome	Neutrophil degranulation; Cilium Assembly; Sealing of the nuclear envelope (NE) by ESCRT-III		4		100	0.01	-6.64386			300	Tubulin beta chain	TUB2
High	Master Protein	P53598	Succinate--CoA ligase [ADP-forming] subunit alpha, mitochondrial OS=Saccharomyces cerevisiae (strain ATCC 204508 / S288c) OX=559292 GN=LSC1 PE=1 SV=1	0	14.176	12	3	3	3	329	35	8.46	5.83	3	Pf00549, Pf02629	854310	LSC1	Citrate cycle (TCA cycle); Propanoate metabolism; Metabolic pathways; Biosynthesis of secondary metabolites; Carbon metabolism	Citric acid cycle (TCA cycle)		6		100	0.01	-6.64386			300	Succinate--CoA ligase [ADP-forming] subunit alpha, mitochondrial	LSC1
High	Master Protein	P39935	Eukaryotic initiation factor 4F subunit p150 OS=Saccharomyces cerevisiae (strain ATCC 204508 / S288c) OX=559292 GN=TIF4631 PE=1 SV=2	0	13.25	5	3	3	3	952	107	6.04	4.97	3	Pf02854, Pf12152	853071	TIF4631		L13a-mediated translational silencing of Ceruloplasmin expression; Nonsense Mediated Decay (NMD) independent of the Exon Junction Complex (EJC); Nonsense Mediated Decay (NMD) enhanced by the Exon Junction Complex (EJC); Translation initiation complex formation; Ribosomal scanning and start codon recognition; mTORC1-mediated signalling; Activation of the mRNA upon binding of the cap-binding comple…		7		100	0.01	-6.64386			300	Eukaryotic initiation factor 4F subunit p150	TIF4631
High	Master Protein	P39015	Suppressor protein STM1 OS=Saccharomyces cerevisiae (strain ATCC 204508 / S288c) OX=559292 GN=STM1 PE=1 SV=3	0	13.091	15	3	3	3	273	30	9.66	7.44	3	Pf04774, Pf09598	850843	STM1		Platelet degranulation		1				#VALUE!				Suppressor protein STM1	STM1
High	Master Protein	P32377	Diphosphomevalonate decarboxylase OS=Saccharomyces cerevisiae (strain ATCC 204508 / S288c) OX=559292 GN=MVD1 PE=1 SV=2	0	12.923	9	3	3	3	396	44.1	5.76	6.2	3	Pf00288, Pf18376	855779	MVD1	Terpenoid backbone biosynthesis; Metabolic pathways; Biosynthesis of secondary metabolites	Cholesterol biosynthesis; Synthesis of Dolichyl-phosphate	Cholesterol biosynthesis	6		100	0.01	-6.64386			300	Diphosphomevalonate decarboxylase	MVD1
High	Master Protein	P54780	60S ribosomal protein L15-B OS=Saccharomyces cerevisiae (strain ATCC 204508 / S288c) OX=559292 GN=RPL15B PE=1 SV=2	0	12.79	17	3	3	3	204	24.4	11.39	7.75	3	Pf00827	855150	RPL15B	Ribosome	L13a-mediated translational silencing of Ceruloplasmin expression; SRP-dependent cotranslational protein targeting to membrane; Formation of a pool of free 40S subunits; GTP hydrolysis and joining of the 60S ribosomal subunit; Nonsense Mediated Decay (NMD) independent of the Exon Junction Complex (EJC); Nonsense Mediated Decay (NMD) enhanced by the Exon Junction Complex (EJC)		7		100	0.01	-6.64386			300	60S ribosomal protein L15-B	RPL15B
High	Master Protein	P05453	Eukaryotic peptide chain release factor GTP-binding subunit OS=Saccharomyces cerevisiae (strain ATCC 204508 / S288c) OX=559292 GN=SUP35 PE=1 SV=1	0	12.768	7	3	3	3	685	76.5	7.01	5.58	3	Pf00009, Pf03143, Pf03144	851752	SUP35	mRNA surveillance pathway	Nonsense Mediated Decay (NMD) independent of the Exon Junction Complex (EJC); Nonsense Mediated Decay (NMD) enhanced by the Exon Junction Complex (EJC); Eukaryotic Translation Termination		4				#VALUE!				Eukaryotic peptide chain release factor GTP-binding subunit	SUP35
High	Master Protein	P00942	Triosephosphate isomerase OS=Saccharomyces cerevisiae (strain ATCC 204508 / S288c) OX=559292 GN=TPI1 PE=1 SV=2	0	12.543	22	3	3	3	248	26.8	6.01	3.98	3	Pf00121	851620	TPI1	Glycolysis / Gluconeogenesis; Fructose and mannose metabolism; Inositol phosphate metabolism; Metabolic pathways; Biosynthesis of secondary metabolites; Carbon metabolism; Biosynthesis of amino acids	Glycolysis; Gluconeogenesis		9		100	0.01	-6.64386			300	Triosephosphate isomerase	TPI1
High	Master Protein	Q05584	Hydroxyacylglutathione hydrolase, cytoplasmic isozyme OS=Saccharomyces cerevisiae (strain ATCC 204508 / S288c) OX=559292 GN=GLO2 PE=1 SV=1	0	12.016	12	3	4	3	274	31.3	6.19	5.7	3	Pf00753, Pf16123	851865	GLO2	Pyruvate metabolism; Metabolic pathways			2		100	0.01	-6.64386			300	Hydroxyacylglutathione hydrolase, cytoplasmic isozyme	GLO2
High	Master Protein	P23542	Aspartate aminotransferase, cytoplasmic OS=Saccharomyces cerevisiae (strain ATCC 204508 / S288c) OX=559292 GN=AAT2 PE=1 SV=3	0	11.966	10	3	3	3	418	46	8.32	5.67	3	Pf00155	850714	AAT2	Arginine biosynthesis; Alanine, aspartate and glutamate metabolism; Cysteine and methionine metabolism; Arginine and proline metabolism; Tyrosine metabolism; Phenylalanine metabolism; Phenylalanine, tyrosine and tryptophan biosynthesis; Metabolic pathways; Biosynthesis of secondary metabolites; Carbon metabolism; 2-Oxocarboxylic acid metabolism; Biosynthesis of amino acids	Gluconeogenesis; Aspartate and asparagine metabolism		14		100	0.01	-6.64386			300	Aspartate aminotransferase, cytoplasmic	AAT2
High	Master Protein	Q12447	Polyamine N-acetyltransferase 1 OS=Saccharomyces cerevisiae (strain ATCC 204508 / S288c) OX=559292 GN=PAA1 PE=1 SV=1	0	11.858	21	3	3	3	191	21.9	5.82	5.68	3	Pf00583	851643	PAA1		Serotonin and melatonin biosynthesis		1		100	0.01	-6.64386			300	Polyamine N-acetyltransferase 1	PAA1
High	Master Protein	P40825	Alanine--tRNA ligase, mitochondrial OS=Saccharomyces cerevisiae (strain ATCC 204508 / S288c) OX=559292 GN=ALA1 PE=1 SV=3	0	11.856	6	3	3	3	983	110	5.71	3.05	3	Pf01411, Pf02272, Pf07973	854513	ALA1	Aminoacyl-tRNA biosynthesis			1		100	0.01	-6.64386			300	Alanine--tRNA ligase, mitochondrial	ALA1
High	Master Protein	P34760	Peroxiredoxin TSA1 OS=Saccharomyces cerevisiae (strain ATCC 204508 / S288c) OX=559292 GN=TSA1 PE=1 SV=3	0	11.827	22	3	3	3	196	21.6	5.14	5.34	3	Pf00578, Pf10417	854980	TSA1		Neutrophil degranulation; TP53 Regulates Metabolic Genes; KEAP1-NFE2L2 pathway		3		100	0.01	-6.64386			300	Peroxiredoxin TSA1	TSA1
High	Master Protein	P40482	Protein transport protein SEC24 OS=Saccharomyces cerevisiae (strain ATCC 204508 / S288c) OX=559292 GN=SEC24 PE=1 SV=1	0	11.599	5	3	3	3	926	103.6	6.23	5.66	3	Pf00626, Pf04810, Pf04811, Pf04815, Pf08033	854697	SEC24	Protein processing in endoplasmic reticulum	COPII-mediated vesicle transport; Cargo concentration in the ER; Antigen Presentation: Folding, assembly and peptide loading of class I MHC		4				#VALUE!				Protein transport protein SEC24	SEC24
High	Master Protein	P47176	Branched-chain-amino-acid aminotransferase, cytosolic OS=Saccharomyces cerevisiae (strain ATCC 204508 / S288c) OX=559292 GN=BAT2 PE=1 SV=1	0	11.535	19	4	4	3	376	41.6	7.3	2.64	4	Pf01063	853613	BAT2	Cysteine and methionine metabolism; Valine, leucine and isoleucine degradation; Valine, leucine and isoleucine biosynthesis; Pantothenate and CoA biosynthesis; Metabolic pathways; Biosynthesis of secondary metabolites; 2-Oxocarboxylic acid metabolism; Biosynthesis of amino acids; Biosynthesis of cofactors	Branched-chain amino acid catabolism		10		100	0.01	-6.64386			300	Branched-chain-amino-acid aminotransferase, cytosolic	BAT2
High	Master Protein	P46680	Actin-interacting protein 1 OS=Saccharomyces cerevisiae (strain ATCC 204508 / S288c) OX=559292 GN=AIP1 PE=1 SV=1	0	10.833	6	3	3	3	615	67.3	5.59	4.9	3	Pf00400	855117	AIP1		Platelet degranulation		1		100	0.01	-6.64386			300	Actin-interacting protein 1	AIP1
High	Master Protein	P41807	V-type proton ATPase subunit H OS=Saccharomyces cerevisiae (strain ATCC 204508 / S288c) OX=559292 GN=VMA13 PE=1 SV=1	0	10.663	6	3	3	3	478	54.4	6.35	6.77	3	Pf03224, Pf11698	856148	VMA13	Oxidative phosphorylation; Metabolic pathways; Phagosome	ROS and RNS production in phagocytes; Insulin receptor recycling; Transferrin endocytosis and recycling; Amino acids regulate mTORC1		7				#VALUE!				V-type proton ATPase subunit H	VMA13
High	Master Protein	Q00764	Alpha,alpha-trehalose-phosphate synthase [UDP-forming] 56 kDa subunit OS=Saccharomyces cerevisiae (strain ATCC 204508 / S288c) OX=559292 GN=TPS1 PE=1 SV=2	0	10.613	9	3	3	3	495	56.1	6.09	4.13	3	Pf00982	852423	TPS1	Starch and sucrose metabolism; Metabolic pathways; Biosynthesis of secondary metabolites			3				#VALUE!				Alpha,alpha-trehalose-phosphate synthase [UDP-forming] 56 kDa subunit	TPS1
High	Master Protein	P39683	Nicotinate phosphoribosyltransferase OS=Saccharomyces cerevisiae (strain ATCC 204508 / S288c) OX=559292 GN=NPT1 PE=1 SV=3	0	10.604	9	3	3	3	429	49	6.92	5.48	3	Pf04095, Pf17767	854384	NPT1	Nicotinate and nicotinamide metabolism; Metabolic pathways; Biosynthesis of cofactors			3				#VALUE!				Nicotinate phosphoribosyltransferase	NPT1
High	Master Protein	Q05016	NADP-dependent 3-hydroxy acid dehydrogenase OS=Saccharomyces cerevisiae (strain ATCC 204508 / S288c) OX=559292 GN=YMR226C PE=1 SV=1	0	10.541	16	3	3	3	267	29.1	6.81	3.06	3	Pf00106	855266		Pyrimidine metabolism; Glycine, serine and threonine metabolism; Metabolic pathways			3		100	0.01	-6.64386			300	NADP-dependent 3-hydroxy acid dehydrogenase	YMR226C
High	Master Protein	P18239	ADP,ATP carrier protein 2 OS=Saccharomyces cerevisiae (strain ATCC 204508 / S288c) OX=559292 GN=PET9 PE=1 SV=2	0	10.082	13	4	4	3	318	34.4	9.79	4.7	4	Pf00153	852250	PET9		Mitochondrial protein import; Transport of nucleosides and free purine and pyrimidine bases across the plasma membrane		2	0.01	0.37	0.01	-6.64386		219	81	ADP,ATP carrier protein 2	PET9
High	Master Protein	Q08971	Protein PBDC1 homolog OS=Saccharomyces cerevisiae (strain ATCC 204508 / S288c) OX=559292 GN=YPL225W PE=1 SV=1	0	8.489	18	3	3	3	146	17.4	5.3	5.71	3	Pf04669	855876					0		100	0.01	-6.64386			300	Protein PBDC1 homolog	YPL225W
High	Master Protein	P38249	Eukaryotic translation initiation factor 3 subunit A OS=Saccharomyces cerevisiae (strain ATCC 204508 / S288c) OX=559292 GN=RPG1 PE=1 SV=1	0	8.378	4	3	3	3	964	110.3	6.3	4.41	3		852371	RPG1		L13a-mediated translational silencing of Ceruloplasmin expression; Translation initiation complex formation; Formation of the ternary complex, and subsequently, the 43S complex; Ribosomal scanning and start codon recognition		4				#VALUE!				Eukaryotic translation initiation factor 3 subunit A	RPG1
High	Master Protein	P53981	Polyol phosphate phosphatase PYP1 OS=Saccharomyces cerevisiae (strain ATCC 204508 / S288c) OX=559292 GN=PYP1 PE=1 SV=1	0	8.133	12	3	3	3	241	27.5	5.45	2.07	3	Pf12710	855722	PYP1				0		100	0.01	-6.64386			300	Polyol phosphate phosphatase PYP1	PYP1
High	Master Protein	P13298	Orotate phosphoribosyltransferase 1 OS=Saccharomyces cerevisiae (strain ATCC 204508 / S288c) OX=559292 GN=URA5 PE=1 SV=2	0	8.117	28	3	3	3	226	24.6	6.05	3.75	3	Pf00156	854865	URA5	Pyrimidine metabolism; Metabolic pathways; Biosynthesis of cofactors			3		100	0.01	-6.64386			300	Orotate phosphoribosyltransferase 1	URA5
High	Master Protein	P07703	DNA-directed RNA polymerases I and III subunit RPAC1 OS=Saccharomyces cerevisiae (strain ATCC 204508 / S288c) OX=559292 GN=RPC40 PE=1 SV=1	0	7.947	10	3	3	3	335	37.7	5.52	2.6	3	Pf01000, Pf01193	856226	RPC40	RNA polymerase	RNA Polymerase III Transcription Initiation From Type 1 Promoter; RNA Polymerase III Transcription Initiation From Type 2 Promoter; RNA Polymerase I Promoter Escape; RNA Polymerase I Transcription Initiation		5		100	0.01	-6.64386			300	DNA-directed RNA polymerases I and III subunit RPAC1	RPC40
High	Master Protein	Q12074	Spermidine synthase SPE3 OS=Saccharomyces cerevisiae (strain ATCC 204508 / S288c) OX=559292 GN=SPE3 PE=1 SV=1	0	7.886	13	3	3	3	293	33.3	5.53	1.77	3	Pf01564, Pf17284	856182	SPE3	Cysteine and methionine metabolism; Arginine and proline metabolism; Glutathione metabolism; Metabolic pathways	Metabolism of polyamines	Nucleotide metabolism	6		100	0.01	-6.64386			300	Spermidine synthase SPE3	SPE3
High	Master Protein	P40413	T-complex protein 1 subunit epsilon OS=Saccharomyces cerevisiae (strain ATCC 204508 / S288c) OX=559292 GN=CCT5 PE=1 SV=3	0	6.708	7	3	3	3	562	61.9	5.53	2.21	3	Pf00118	853527	CCT5		Association of TriC/CCT with target proteins during biosynthesis; Cooperation of PDCL (PhLP1) and TRiC/CCT in G-protein beta folding		2				#VALUE!				T-complex protein 1 subunit epsilon	CCT5
High	Master Protein	P28007	H/ACA ribonucleoprotein complex subunit GAR1 OS=Saccharomyces cerevisiae (strain ATCC 204508 / S288c) OX=559292 GN=GAR1 PE=1 SV=1	0	6.105	16	3	3	3	205	21.5	11.46	1.79	3	Pf04410	856489	GAR1	Ribosome biogenesis in eukaryotes			1		100	0.01	-6.64386			300	H/ACA ribonucleoprotein complex subunit GAR1	GAR1
High	Master Protein	P51862	RHO1 GDP-GTP exchange protein 2 OS=Saccharomyces cerevisiae (strain ATCC 204508 / S288c) OX=559292 GN=ROM2 PE=1 SV=1	0	6.075	3	3	3	3	1356	152.5	9.2	2.16	3	Pf00610, Pf00621, Pf00780, Pf15405	851086	ROM2	MAPK signaling pathway			1		100	0.01	-6.64386			300	RHO1 GDP-GTP exchange protein 2	ROM2
High	Master Protein	P36421	Tyrosine--tRNA ligase, cytoplasmic OS=Saccharomyces cerevisiae (strain ATCC 204508 / S288c) OX=559292 GN=TYS1 PE=1 SV=3	0	5.935	6	3	3	3	394	44	8.44	3.91	3	Pf00579	853097	TYS1	Aminoacyl-tRNA biosynthesis			1		100	0.01	-6.64386			300	Tyrosine--tRNA ligase, cytoplasmic	TYS1
High	Master Protein	P38088	Glycine--tRNA ligase 1, mitochondrial OS=Saccharomyces cerevisiae (strain ATCC 204508 / S288c) OX=559292 GN=GRS1 PE=1 SV=3	0	5.878	4	3	3	3	690	78.1	6.52	0	3	Pf03129	852418	GRS1	Aminoacyl-tRNA biosynthesis			1		100	0.01	-6.64386			300	Glycine--tRNA ligase 1, mitochondrial	GRS1
High	Master Protein	P40303	Proteasome subunit alpha type-4 OS=Saccharomyces cerevisiae (strain ATCC 204508 / S288c) OX=559292 GN=PRE6 PE=1 SV=1	0	5.759	21	3	3	3	254	28.4	7.36	0	3	Pf00227, Pf10584	854119	PRE6	Proteasome	Cross-presentation of soluble exogenous antigens (endosomes); TNFR2 non-canonical NF-kB pathway; Ub-specific processing proteases	Proteasome degradation	5		100	0.01	-6.64386			300	Proteasome subunit alpha type-4	PRE6
High	Master Protein	P39517	ATP-dependent RNA helicase DHH1 OS=Saccharomyces cerevisiae (strain ATCC 204508 / S288c) OX=559292 GN=DHH1 PE=1 SV=1	0	5.214	7	3	3	3	506	57.5	7.97	0	3	Pf00270, Pf00271	851394	DHH1	RNA degradation	mRNA decay by 5' to 3' exoribonuclease		2		100	0.01	-6.64386			300	ATP-dependent RNA helicase DHH1	DHH1
High	Master Protein	P05738	60S ribosomal protein L9-A OS=Saccharomyces cerevisiae (strain ATCC 204508 / S288c) OX=559292 GN=RPL9A PE=1 SV=2	0	56.956	55	9	15	2	191	21.6	9.73	30.33	9	Pf00347	852730	RPL9A	Ribosome			1	37.561	7.857	1.943	0.958286	107.1	14.1	178.8	60S ribosomal protein L9-A	RPL9A
High	Master Protein	P36105	60S ribosomal protein L14-A OS=Saccharomyces cerevisiae (strain ATCC 204508 / S288c) OX=559292 GN=RPL14A PE=1 SV=1	0	36.771	55	9	12	2	138	15.2	10.93	12.53	9	Pf01929	853864	RPL14A	Ribosome			1	0.334	2.556	0.148	-2.75633	6.7	51.4	241.9	60S ribosomal protein L14-A	RPL14A
High	Master Protein	P11412	Glucose-6-phosphate 1-dehydrogenase OS=Saccharomyces cerevisiae (strain ATCC 204508 / S288c) OX=559292 GN=ZWF1 PE=1 SV=4	0	20.603	6	2	3	2	505	57.5	6.3	7.74	2	Pf00479, Pf02781	855480	ZWF1	Pentose phosphate pathway; Glutathione metabolism; Metabolic pathways; Biosynthesis of secondary metabolites; Carbon metabolism	TP53 Regulates Metabolic Genes; Pentose phosphate pathway		7		100	0.01	-6.64386			300	Glucose-6-phosphate 1-dehydrogenase	ZWF1
High	Master Protein	P15731	Ubiquitin-conjugating enzyme E2 4 OS=Saccharomyces cerevisiae (strain ATCC 204508 / S288c) OX=559292 GN=UBC4 PE=1 SV=1	0	16.491	38	2	2	2	148	16.4	6.52	6.67	2	Pf00179	852376	UBC4	Ubiquitin mediated proteolysis; Protein processing in endoplasmic reticulum	Peroxisomal protein import	Proteasome degradation	4				#VALUE!				Ubiquitin-conjugating enzyme E2 4	UBC4
High	Master Protein	Q04792	Glutamate decarboxylase OS=Saccharomyces cerevisiae (strain ATCC 204508 / S288c) OX=559292 GN=GAD1 PE=1 SV=1	0	16.192	5	2	2	2	585	65.9	6.62	5.85	2	Pf00282	855291	GAD1	Alanine, aspartate and glutamate metabolism; beta-Alanine metabolism; Taurine and hypotaurine metabolism; Butanoate metabolism; Metabolic pathways; Biosynthesis of secondary metabolites			6		100	0.01	-6.64386			300	Glutamate decarboxylase	GAD1
High	Master Protein	Q12434	Rho GDP-dissociation inhibitor OS=Saccharomyces cerevisiae (strain ATCC 204508 / S288c) OX=559292 GN=RDI1 PE=1 SV=1	0	15.604	20	2	3	2	202	23.1	6.04	5.65	2	Pf02115	851420	RDI1		RAC1 GTPase cycle; RHOA GTPase cycle; CDC42 GTPase cycle; RAC3 GTPase cycle		4		100	0.01	-6.64386			300	Rho GDP-dissociation inhibitor	RDI1
High	Master Protein	P20107	Zinc/cadmium resistance protein OS=Saccharomyces cerevisiae (strain ATCC 204508 / S288c) OX=559292 GN=ZRC1 PE=1 SV=2	0	14.107	10	2	2	2	442	48.3	6.35	3.4	2	Pf01545	855284	ZRC1		Metal ion SLC transporters; Zinc efflux and compartmentalization by the SLC30 family		2		100	0.01	-6.64386			300	Zinc/cadmium resistance protein	ZRC1
High	Master Protein	P38264	SRP-independent targeting protein 3 OS=Saccharomyces cerevisiae (strain ATCC 204508 / S288c) OX=559292 GN=PHO88 PE=1 SV=1	0	13.979	15	2	3	2	188	21.1	9.19	4.41	2	Pf10032	852403	PHO88				0		100	0.01	-6.64386			300	SRP-independent targeting protein 3	PHO88
High	Master Protein	P32774	Transcription initiation factor IIA subunit 2 OS=Saccharomyces cerevisiae (strain ATCC 204508 / S288c) OX=559292 GN=TOA2 PE=1 SV=1	0	13.514	16	2	3	2	122	13.5	5.1	7.92	2	Pf02268, Pf02751	853807	TOA2	Basal transcription factors	RNA Polymerase II Pre-transcription Events; RNA polymerase II transcribes snRNA genes; RNA Polymerase II Promoter Escape; RNA Polymerase II Transcription Pre-Initiation And Promoter Opening; RNA Polymerase II Transcription Initiation; Estrogen-dependent gene expression	Eukaryotic transcription initiation	9		100	0.01	-6.64386			300	Transcription initiation factor IIA subunit 2	TOA2
High	Master Protein	Q99288	Broad-range acid phosphatase DET1 OS=Saccharomyces cerevisiae (strain ATCC 204508 / S288c) OX=559292 GN=DET1 PE=1 SV=1	0	11.788	10	2	2	2	334	39.1	7.34	6.51	2	Pf00300	851621	DET1				0				#VALUE!				Broad-range acid phosphatase DET1	DET1
High	Master Protein	P02992	Elongation factor Tu, mitochondrial OS=Saccharomyces cerevisiae (strain ATCC 204508 / S288c) OX=559292 GN=TUF1 PE=1 SV=1	0	11.343	8	2	2	2	437	47.9	6.65	4.5	2	Pf00009, Pf03143, Pf03144	854359	TUF1				0		100	0.01	-6.64386			300	Elongation factor Tu, mitochondrial	TUF1
High	Master Protein	P04806	Hexokinase-1 OS=Saccharomyces cerevisiae (strain ATCC 204508 / S288c) OX=559292 GN=HXK1 PE=1 SV=2	0	11.29	10	4	4	2	485	53.7	5.45	8.3	4	Pf00349, Pf03727	850614	HXK1	Glycolysis / Gluconeogenesis; Fructose and mannose metabolism; Galactose metabolism; Starch and sucrose metabolism; Amino sugar and nucleotide sugar metabolism; Metabolic pathways; Biosynthesis of secondary metabolites; Carbon metabolism; Biosynthesis of nucleotide sugars	Neutrophil degranulation; Regulation of Glucokinase by Glucokinase Regulatory Protein		12		100	0.01	-6.64386			300	Hexokinase-1	HXK1
High	Master Protein	P38115	D-arabinose dehydrogenase [NAD(P)+] heavy chain OS=Saccharomyces cerevisiae (strain ATCC 204508 / S288c) OX=559292 GN=ARA1 PE=1 SV=1	0	10.594	7	2	2	2	344	38.9	5.96	4.82	2	Pf00248	852446	ARA1	Ascorbate and aldarate metabolism; Metabolic pathways	RA biosynthesis pathway; Estrogen biosynthesis; Synthesis of bile acids and bile salts via 7alpha-hydroxycholesterol; Synthesis of bile acids and bile salts via 24-hydroxycholesterol; Synthesis of bile acids and bile salts via 27-hydroxycholesterol; Pregnenolone biosynthesis; Synthesis of Prostaglandins (PG) and Thromboxanes (TX); Fructose biosynthesis; Prednisone ADME		11		100	0.01	-6.64386			300	D-arabinose dehydrogenase [NAD(P)+] heavy chain	ARA1
High	Master Protein	P02309	Histone H4 OS=Saccharomyces cerevisiae (strain ATCC 204508 / S288c) OX=559292 GN=HHF2 PE=1 SV=2	0	10.531	15	2	2	2	103	11.4	11.36	6.28	2	Pf15511	852294; 855701	HHF1; HHF2		Condensation of Prophase Chromosomes; HDMs demethylate histones; HATs acetylate histones; RMTs methylate histone arginines; SUMOylation of chromatin organization proteins		5		100	0.01	-6.64386			300	Histone H4	HHF2
High	Master Protein	Q04947	Reticulon-like protein 1 OS=Saccharomyces cerevisiae (strain ATCC 204508 / S288c) OX=559292 GN=RTN1 PE=1 SV=1	0	10.4	9	2	2	2	295	32.9	8.98	5.19	2	Pf02453	851819	RTN1				0				#VALUE!				Reticulon-like protein 1	RTN1
High	Master Protein	P31376	SWR1-complex protein 3 OS=Saccharomyces cerevisiae (strain ATCC 204508 / S288c) OX=559292 GN=SWC3 PE=1 SV=2	0	9.979	9	2	2	2	625	72.5	9.16	3.44	2		851222	SWC3				0		100	0.01	-6.64386			300	SWR1-complex protein 3	SWC3
High	Master Protein	P15873	Proliferating cell nuclear antigen OS=Saccharomyces cerevisiae (strain ATCC 204508 / S288c) OX=559292 GN=POL30 PE=1 SV=1	0	9.881	8	2	2	2	258	28.9	4.59	4.88	2	Pf00705, Pf02747	852385	POL30	DNA replication; Base excision repair; Nucleotide excision repair; Mismatch repair	SUMOylation of DNA replication proteins; Mismatch repair (MMR) directed by MSH2:MSH6 (MutSalpha); Polymerase switching; Removal of the Flap Intermediate	DNA replication	10				#VALUE!				Proliferating cell nuclear antigen	POL30
High	Master Protein	P30624	Long-chain-fatty-acid--CoA ligase 1 OS=Saccharomyces cerevisiae (strain ATCC 204508 / S288c) OX=559292 GN=FAA1 PE=1 SV=1	0	9.823	5	2	2	2	700	77.8	7.62	3.35	2	Pf00501	854495	FAA1	Fatty acid biosynthesis; Fatty acid degradation; Metabolic pathways; Fatty acid metabolism; Peroxisome	Intracellular metabolism of fatty acids regulates insulin secretion; Synthesis of very long-chain fatty acyl-CoAs		7				#VALUE!				Long-chain-fatty-acid--CoA ligase 1	FAA1
High	Master Protein	Q06488	Chromatin structure-remodeling complex subunit RSC2 OS=Saccharomyces cerevisiae (strain ATCC 204508 / S288c) OX=559292 GN=RSC2 PE=1 SV=1	0	8.962	3	2	2	2	889	102.2	8.91	3.18	2	Pf00439, Pf01426	851071	RSC2				0		100	0.01	-6.64386			300	Chromatin structure-remodeling complex subunit RSC2	RSC2
High	Master Protein	P38205	Multisite-specific tRNA:(cytosine-C(5))-methyltransferase OS=Saccharomyces cerevisiae (strain ATCC 204508 / S288c) OX=559292 GN=NCL1 PE=1 SV=1	0	8.589	4	2	2	2	684	77.8	7.36	3.89	2	Pf01189	852257	NCL1				0				#VALUE!				Multisite-specific tRNA:(cytosine-C(5))-methyltransferase	NCL1
High	Master Protein	P47117	Actin-related protein 3 OS=Saccharomyces cerevisiae (strain ATCC 204508 / S288c) OX=559292 GN=ARP3 PE=1 SV=1	0	8.416	9	2	2	2	449	49.5	5.8	4.23	2	Pf00022	853528	ARP3	Autophagy; Endocytosis	Regulation of actin dynamics for phagocytic cup formation; RHO GTPases Activate WASPs and WAVEs		4		100	0.01	-6.64386			300	Actin-related protein 3	ARP3
High	Master Protein	Q12458	Putative reductase 1 OS=Saccharomyces cerevisiae (strain ATCC 204508 / S288c) OX=559292 GN=YPR1 PE=1 SV=1	0	8.2	10	2	2	2	312	34.7	7.12	2.18	2	Pf00248	851974	YPR1		Estrogen biosynthesis; Synthesis of bile acids and bile salts via 7alpha-hydroxycholesterol; Synthesis of bile acids and bile salts via 24-hydroxycholesterol; Synthesis of bile acids and bile salts via 27-hydroxycholesterol; Pregnenolone biosynthesis; Synthesis of Prostaglandins (PG) and Thromboxanes (TX); RA biosynthesis pathway; Fructose biosynthesis; Prednisone ADME		9				#VALUE!				Putative reductase 1	YPR1
High	Master Protein	P34909	General negative regulator of transcription subunit 4 OS=Saccharomyces cerevisiae (strain ATCC 204508 / S288c) OX=559292 GN=MOT2 PE=1 SV=1	0	7.972	5	2	2	2	587	65.3	8.07	4.94	2	Pf14570	856799	MOT2	RNA degradation			1		100	0.01	-6.64386			300	General negative regulator of transcription subunit 4	MOT2
High	Master Protein	P32432	Transcription factor SFP1 OS=Saccharomyces cerevisiae (strain ATCC 204508 / S288c) OX=559292 GN=SFP1 PE=1 SV=1	0	7.914	5	2	2	2	683	74.7	6.7	2.96	2		851119	SFP1				0		100	0.01	-6.64386			300	Transcription factor SFP1	SFP1
High	Master Protein	P54113	Bifunctional purine biosynthesis protein ADE16 OS=Saccharomyces cerevisiae (strain ATCC 204508 / S288c) OX=559292 GN=ADE16 PE=1 SV=1	0	7.754	8	4	4	2	591	65.2	6.55	1.64	4	Pf01808, Pf02142	850715	ADE16	Purine metabolism; One carbon pool by folate; Metabolic pathways; Biosynthesis of secondary metabolites			4		100	0.01	-6.64386			300	Bifunctional purine biosynthesis protein ADE16	ADE16
High	Master Protein	P54838	Dihydroxyacetone kinase 1 OS=Saccharomyces cerevisiae (strain ATCC 204508 / S288c) OX=559292 GN=DAK1 PE=1 SV=1	0	7.667	4	2	2	2	584	62.2	5.41	2.06	2	Pf02733, Pf02734	854932	DAK1	Fructose and mannose metabolism; Glycerolipid metabolism; Methane metabolism; Metabolic pathways; Carbon metabolism	Fructose catabolism		6		100	0.01	-6.64386			300	Dihydroxyacetone kinase 1	DAK1
High	Master Protein	P32588	Nuclear and cytoplasmic polyadenylated RNA-binding protein PUB1 OS=Saccharomyces cerevisiae (strain ATCC 204508 / S288c) OX=559292 GN=PUB1 PE=1 SV=4	0	7.598	6	2	2	2	453	50.7	5.11	2.69	2	Pf00076	855716	PUB1				0		100	0.01	-6.64386			300	Nuclear and cytoplasmic polyadenylated RNA-binding protein PUB1	PUB1
High	Master Protein	P29952	Mannose-6-phosphate isomerase OS=Saccharomyces cerevisiae (strain ATCC 204508 / S288c) OX=559292 GN=PMI40 PE=1 SV=4	0	7.479	4	2	3	2	429	48.2	5.99	4.73	2	Pf01238, Pf20511, Pf20512	856720	PMI40	Fructose and mannose metabolism; Amino sugar and nucleotide sugar metabolism; Metabolic pathways; Biosynthesis of secondary metabolites; Biosynthesis of cofactors; Biosynthesis of nucleotide sugars	Synthesis of GDP-mannose		7		100	0.01	-6.64386			300	Mannose-6-phosphate isomerase	PMI40
High	Master Protein	P32445	Single-stranded DNA-binding protein RIM1, mitochondrial OS=Saccharomyces cerevisiae (strain ATCC 204508 / S288c) OX=559292 GN=RIM1 PE=1 SV=1	0	7.368	22	2	2	2	135	15.4	8.34	2.43	2	Pf00436	850395	RIM1				0				#VALUE!				Single-stranded DNA-binding protein RIM1, mitochondrial	RIM1
High	Master Protein	P07263	Histidine--tRNA ligase, mitochondrial OS=Saccharomyces cerevisiae (strain ATCC 204508 / S288c) OX=559292 GN=HTS1 PE=1 SV=2	0	7.267	4	2	2	2	546	59.9	7.71	3	2	Pf03129, Pf13393	856145	HTS1	Aminoacyl-tRNA biosynthesis			1		100	0.01	-6.64386			300	Histidine--tRNA ligase, mitochondrial	HTS1
High	Master Protein	P39958	Rab GDP-dissociation inhibitor OS=Saccharomyces cerevisiae (strain ATCC 204508 / S288c) OX=559292 GN=GDI1 PE=1 SV=1	0	6.873	8	2	2	2	451	51.2	5.99	0	2	Pf00996	856876	GDI1		Neutrophil degranulation; RAB GEFs exchange GTP for GDP on RABs		2				#VALUE!				Rab GDP-dissociation inhibitor	GDI1
High	Master Protein	P51601	GTP cyclohydrolase 1 OS=Saccharomyces cerevisiae (strain ATCC 204508 / S288c) OX=559292 GN=FOL2 PE=1 SV=1	0	6.785	14	2	2	2	243	27.8	7.23	2.54	2	Pf01227	853183	FOL2	Folate biosynthesis; Metabolic pathways; Biosynthesis of cofactors	Tetrahydrobiopterin (BH4) synthesis, recycling, salvage and regulation		4		100	0.01	-6.64386			300	GTP cyclohydrolase 1	FOL2
High	Master Protein	P53622	Coatomer subunit alpha OS=Saccharomyces cerevisiae (strain ATCC 204508 / S288c) OX=559292 GN=COP1 PE=1 SV=2	0	6.627	2	2	2	2	1201	135.5	5.99	3.66	2	Pf00400, Pf04053, Pf06957	851410	COP1		COPI-mediated anterograde transport; COPI-dependent Golgi-to-ER retrograde traffic		2				#VALUE!				Coatomer subunit alpha	COP1
High	Master Protein	P38809	Uncharacterized protein YHR097C OS=Saccharomyces cerevisiae (strain ATCC 204508 / S288c) OX=559292 GN=YHR097C PE=1 SV=1	0	6.238	8	2	2	2	366	40.6	9.91	2.27	2	Pf08316	856497					0				#VALUE!				Uncharacterized protein YHR097C	YHR097C
High	Master Protein	P23644	Mitochondrial import receptor subunit TOM40 OS=Saccharomyces cerevisiae (strain ATCC 204508 / S288c) OX=559292 GN=TOM40 PE=1 SV=1	0	6.232	6	2	2	2	387	42	5.54	2.08	2	Pf01459	855243	TOM40				0		100	0.01	-6.64386			300	Mitochondrial import receptor subunit TOM40	TOM40
High	Master Protein	P38891	Branched-chain-amino-acid aminotransferase, mitochondrial OS=Saccharomyces cerevisiae (strain ATCC 204508 / S288c) OX=559292 GN=BAT1 PE=1 SV=1	0	6.104	11	3	3	2	393	43.6	8.91	0	3	Pf01063	856615	BAT1	Cysteine and methionine metabolism; Valine, leucine and isoleucine degradation; Valine, leucine and isoleucine biosynthesis; Pantothenate and CoA biosynthesis; Metabolic pathways; Biosynthesis of secondary metabolites; 2-Oxocarboxylic acid metabolism; Biosynthesis of amino acids; Biosynthesis of cofactors	Branched-chain amino acid catabolism		10		100	0.01	-6.64386			300	Branched-chain-amino-acid aminotransferase, mitochondrial	BAT1
High	Master Protein	P23369	54S ribosomal protein L25, mitochondrial OS=Saccharomyces cerevisiae (strain ATCC 204508 / S288c) OX=559292 GN=MRPL25 PE=1 SV=2	0	6.099	17	2	2	2	157	18.6	10.04	0	2	Pf18126	852967	MRPL25				0		100	0.01	-6.64386			300	54S ribosomal protein L25, mitochondrial	MRPL25
High	Master Protein	P20449	ATP-dependent RNA helicase DBP5 OS=Saccharomyces cerevisiae (strain ATCC 204508 / S288c) OX=559292 GN=DBP5 PE=1 SV=2	0	6.019	5	2	2	2	482	53.8	7.43	3.44	2	Pf00270, Pf00271	854211	DBP5	Nucleocytoplasmic transport; mRNA surveillance pathway			2		100	0.01	-6.64386			300	ATP-dependent RNA helicase DBP5	DBP5
High	Master Protein	P52488	Ubiquitin-activating enzyme E1-like OS=Saccharomyces cerevisiae (strain ATCC 204508 / S288c) OX=559292 GN=UBA2 PE=1 SV=1	0	5.865	6	2	2	2	636	71.2	5.14	0	2	Pf00899, Pf10585	851998	UBA2	Ubiquitin mediated proteolysis	SUMO is transferred from E1 to E2 (UBE2I, UBC9); SUMO is conjugated to E1 (UBA2:SAE1)		3				#VALUE!				Ubiquitin-activating enzyme E1-like	UBA2
High	Master Protein	P20606	Small COPII coat GTPase SAR1 OS=Saccharomyces cerevisiae (strain ATCC 204508 / S288c) OX=559292 GN=SAR1 PE=1 SV=1	0	5.805	13	2	2	2	190	21.4	5.38	3.41	2	Pf00025	855883	SAR1	Protein processing in endoplasmic reticulum	COPII-mediated vesicle transport; Cargo concentration in the ER; Antigen Presentation: Folding, assembly and peptide loading of class I MHC		4		100	0.01	-6.64386			300	Small COPII coat GTPase SAR1	SAR1
High	Master Protein	P27810	Alpha-1,2 mannosyltransferase KTR1 OS=Saccharomyces cerevisiae (strain ATCC 204508 / S288c) OX=559292 GN=KTR1 PE=1 SV=1	0	5.209	5	2	2	2	393	46	6.68	0	2	Pf01793	854266	KTR1	Other types of O-glycan biosynthesis			1				#VALUE!				Alpha-1,2 mannosyltransferase KTR1	KTR1
High	Master Protein	P22138	DNA-directed RNA polymerase I subunit RPA135 OS=Saccharomyces cerevisiae (strain ATCC 204508 / S288c) OX=559292 GN=RPA135 PE=1 SV=1	0	5.085	2	2	2	2	1203	135.7	7.65	1.91	2	Pf00562, Pf04560, Pf04561, Pf04563, Pf04565, Pf06883	856119	RPA135	RNA polymerase	RNA Polymerase I Promoter Escape; RNA Polymerase I Transcription Initiation	Eukaryotic transcription initiation	4				#VALUE!				DNA-directed RNA polymerase I subunit RPA135	RPA135
High	Master Protein	P32831	Negative growth regulatory protein NGR1 OS=Saccharomyces cerevisiae (strain ATCC 204508 / S288c) OX=559292 GN=NGR1 PE=1 SV=2	0	4.933	3	2	2	2	672	75	8.13	0	2	Pf00076	852513	NGR1				0				#VALUE!				Negative growth regulatory protein NGR1	NGR1
High	Master Protein	Q00055	Glycerol-3-phosphate dehydrogenase [NAD(+)] 1 OS=Saccharomyces cerevisiae (strain ATCC 204508 / S288c) OX=559292 GN=GPD1 PE=1 SV=4	0	4.789	5	2	2	2	391	42.8	5.47	4.42	2	Pf01210, Pf07479	851539	GPD1	Glycerophospholipid metabolism; Biosynthesis of secondary metabolites; MAPK signaling pathway	Synthesis of PA		4				#VALUE!				Glycerol-3-phosphate dehydrogenase [NAD(+)] 1	GPD1
High	Master Protein	P39685	Nucleoporin POM152 OS=Saccharomyces cerevisiae (strain ATCC 204508 / S288c) OX=559292 GN=POM152 PE=1 SV=1	0	4.77	2	2	2	2	1337	151.6	6.74	2.23	2		855159	POM152	Nucleocytoplasmic transport			1		100	0.01	-6.64386			300	Nucleoporin POM152	POM152
High	Master Protein	Q04225	Ribosome assembly protein RRB1 OS=Saccharomyces cerevisiae (strain ATCC 204508 / S288c) OX=559292 GN=RRB1 PE=1 SV=1	0	4.715	6	2	2	2	511	57.2	4.63	0	2	Pf00400, Pf12265	855161	RRB1				0		100	0.01	-6.64386			300	Ribosome assembly protein RRB1	RRB1
High	Master Protein	P38758	Putative oxidoreductase TDA3 OS=Saccharomyces cerevisiae (strain ATCC 204508 / S288c) OX=559292 GN=TDA3 PE=1 SV=2	0	4.659	6	2	2	2	523	57.6	5.83	0	2	Pf01266	856400	TDA3				0				#VALUE!				Putative oxidoreductase TDA3	TDA3
High	Master Protein	Q06218	ATP-dependent RNA helicase DBP9 OS=Saccharomyces cerevisiae (strain ATCC 204508 / S288c) OX=559292 GN=DBP9 PE=1 SV=1	0	4.632	3	2	2	2	594	68	9.19	3.93	2	Pf00270, Pf00271	850982	DBP9				0		100	0.01	-6.64386			300	ATP-dependent RNA helicase DBP9	DBP9
High	Master Protein	P28274	CTP synthase 1 OS=Saccharomyces cerevisiae (strain ATCC 204508 / S288c) OX=559292 GN=URA7 PE=1 SV=2	0	4.61	4	2	2	2	579	64.7	6.01	0	2	Pf00117, Pf06418	852241	URA7	Pyrimidine metabolism; Metabolic pathways; Nucleotide metabolism; Biosynthesis of cofactors	Interconversion of nucleotide di- and triphosphates		5		100	0.01	-6.64386			300	CTP synthase 1	URA7
High	Master Protein	P38773	2-deoxyglucose-6-phosphate phosphatase 2 OS=Saccharomyces cerevisiae (strain ATCC 204508 / S288c) OX=559292 GN=DOG2 PE=1 SV=1	0	4.571	8	2	2	2	246	27.1	5.74	2.19	2	Pf13419	856439	DOG2				0		100	0.01	-6.64386			300	2-deoxyglucose-6-phosphate phosphatase 2	DOG2
High	Master Protein	P39936	Eukaryotic initiation factor 4F subunit p130 OS=Saccharomyces cerevisiae (strain ATCC 204508 / S288c) OX=559292 GN=TIF4632 PE=1 SV=1	0	4.57	1	2	2	2	914	103.8	7.64	2.35	2	Pf02854, Pf12152	852833	TIF4632		L13a-mediated translational silencing of Ceruloplasmin expression; Translation initiation complex formation; Ribosomal scanning and start codon recognition; Nonsense Mediated Decay (NMD) independent of the Exon Junction Complex (EJC); Nonsense Mediated Decay (NMD) enhanced by the Exon Junction Complex (EJC); Activation of the mRNA upon binding of the cap-binding complex and eIFs, and subsequent b…		7		100	0.01	-6.64386			300	Eukaryotic initiation factor 4F subunit p130	TIF4632
High	Master Protein	P12385	Eukaryotic peptide chain release factor subunit 1 OS=Saccharomyces cerevisiae (strain ATCC 204508 / S288c) OX=559292 GN=SUP45 PE=1 SV=2	0	4.514	5	2	2	2	437	49	5.05	1.82	2	Pf03463, Pf03464, Pf03465	852440	SUP45	mRNA surveillance pathway	Nonsense Mediated Decay (NMD) independent of the Exon Junction Complex (EJC); Nonsense Mediated Decay (NMD) enhanced by the Exon Junction Complex (EJC); Eukaryotic Translation Termination		4				#VALUE!				Eukaryotic peptide chain release factor subunit 1	SUP45
High	Master Protein	P38199	Heterogeneous nuclear rnp K-like protein 2 OS=Saccharomyces cerevisiae (strain ATCC 204508 / S288c) OX=559292 GN=HEK2 PE=1 SV=1	0	4.41	10	2	2	2	381	41.7	6.06	1.79	2	Pf00013	852248	HEK2				0		100	0.01	-6.64386			300	Heterogeneous nuclear rnp K-like protein 2	HEK2
High	Master Protein	P38431	Eukaryotic translation initiation factor 5 OS=Saccharomyces cerevisiae (strain ATCC 204508 / S288c) OX=559292 GN=TIF5 PE=1 SV=1	0	4.381	9	2	2	2	405	45.2	5.06	0	2	Pf01873, Pf02020	856154	TIF5		Ribosomal scanning and start codon recognition		1		100	0.01	-6.64386			300	Eukaryotic translation initiation factor 5	TIF5
High	Master Protein	Q12024	Ribosome biogenesis protein YTM1 OS=Saccharomyces cerevisiae (strain ATCC 204508 / S288c) OX=559292 GN=YTM1 PE=1 SV=1	0	4.226	4	2	2	2	460	51.3	6.96	1.68	2	Pf00400, Pf08154	854446	YTM1		Major pathway of rRNA processing in the nucleolus and cytosol; Antigen processing: Ubiquitination & Proteasome degradation		2				#VALUE!				Ribosome biogenesis protein YTM1	YTM1
High	Master Protein	P53312	Succinate--CoA ligase [ADP-forming] subunit beta, mitochondrial OS=Saccharomyces cerevisiae (strain ATCC 204508 / S288c) OX=559292 GN=LSC2 PE=1 SV=1	0	4.129	5	2	2	2	427	46.9	7.47	2.14	2	Pf00549, Pf08442	853159	LSC2	Citrate cycle (TCA cycle); Propanoate metabolism; Metabolic pathways; Biosynthesis of secondary metabolites; Carbon metabolism	Citric acid cycle (TCA cycle)		6		100	0.01	-6.64386			300	Succinate--CoA ligase [ADP-forming] subunit beta, mitochondrial	LSC2
High	Master Protein	P16603	NADPH--cytochrome P450 reductase OS=Saccharomyces cerevisiae (strain ATCC 204508 / S288c) OX=559292 GN=NCP1 PE=1 SV=3	0	4.088	4	2	2	2	691	76.7	5.19	2.35	2	Pf00175, Pf00258, Pf00667	856438	NCP1		Tetrahydrobiopterin (BH4) synthesis, recycling, salvage and regulation; eNOS activation; VEGFR2 mediated vascular permeability; Extra-nuclear estrogen signaling; Peroxisomal protein import; ROS and RNS production in phagocytes; Nitric oxide stimulates guanylate cyclase; Ion homeostasis		8				#VALUE!				NADPH--cytochrome P450 reductase	NCP1
High	Master Protein	P24783	ATP-dependent RNA helicase DBP2 OS=Saccharomyces cerevisiae (strain ATCC 204508 / S288c) OX=559292 GN=DBP2 PE=1 SV=1	0	4.058	4	2	2	2	546	61	8.78	2.05	2	Pf00270, Pf00271	855611	DBP2	Spliceosome	Estrogen-dependent gene expression; SUMOylation of transcription cofactors		3		100	0.01	-6.64386			300	ATP-dependent RNA helicase DBP2	DBP2
High	Master Protein	Q05022	rRNA biogenesis protein RRP5 OS=Saccharomyces cerevisiae (strain ATCC 204508 / S288c) OX=559292 GN=RRP5 PE=1 SV=1	0	3.963	2	2	2	2	1729	193	6.19	0	2	Pf00575	855269	RRP5		Major pathway of rRNA processing in the nucleolus and cytosol		1				#VALUE!				rRNA biogenesis protein RRP5	RRP5
High	Master Protein	P34221	Protein phosphatase 2C homolog 3 OS=Saccharomyces cerevisiae (strain ATCC 204508 / S288c) OX=559292 GN=PTC3 PE=1 SV=4	0	3.445	5	2	2	2	468	51.3	4.63	0	2	Pf00481	852224	PTC3				0				#VALUE!				Protein phosphatase 2C homolog 3	PTC3
High	Master Protein	P43621	Coatomer subunit delta OS=Saccharomyces cerevisiae (strain ATCC 204508 / S288c) OX=559292 GN=RET2 PE=1 SV=3	0	3.295	4	2	2	2	546	60.6	5.2	0	2	Pf01217	850612	RET2		COPI-mediated anterograde transport; COPI-dependent Golgi-to-ER retrograde traffic		2		100	0.01	-6.64386			300	Coatomer subunit delta	RET2
High	Master Protein	P07244	Bifunctional purine biosynthetic protein ADE5,7 OS=Saccharomyces cerevisiae (strain ATCC 204508 / S288c) OX=559292 GN=ADE57 PE=1 SV=1	0	3.12	5	2	2	2	802	86	5.27	0	2	Pf00586, Pf01071, Pf02769, Pf02843, Pf02844	852617	ADE57	Purine metabolism; Metabolic pathways; Biosynthesis of secondary metabolites	Purine ribonucleoside monophosphate biosynthesis		4				#VALUE!				Bifunctional purine biosynthetic protein ADE5,7	ADE57
High	Master Protein	P35179	Protein transport protein SSS1 OS=Saccharomyces cerevisiae (strain ATCC 204508 / S288c) OX=559292 GN=SSS1 PE=1 SV=2	0.002	2.922	23	2	2	2	80	8.9	9.45	0	2	Pf00584	851659	SSS1	Protein export; Protein processing in endoplasmic reticulum; Phagosome	Insertion of tail-anchored proteins into the endoplasmic reticulum membrane		4		100	0.01	-6.64386			300	Protein transport protein SSS1	SSS1
High	Master Protein	P39076	T-complex protein 1 subunit beta OS=Saccharomyces cerevisiae (strain ATCC 204508 / S288c) OX=559292 GN=CCT2 PE=1 SV=1	0.002	2.669	5	2	2	2	527	57.2	6.11	0	2	Pf00118	854664	CCT2		Neutrophil degranulation; RHOBTB2 GTPase cycle; Association of TriC/CCT with target proteins during biosynthesis; Cooperation of PDCL (PhLP1) and TRiC/CCT in G-protein beta folding; RHOBTB1 GTPase cycle		5				#VALUE!				T-complex protein 1 subunit beta	CCT2
High	Master Protein	P24280	SEC14 cytosolic factor OS=Saccharomyces cerevisiae (strain ATCC 204508 / S288c) OX=559292 GN=SEC14 PE=1 SV=3	0.001	2.63	7	2	2	2	304	34.9	5.49	0	2	Pf00650, Pf03765	855103	SEC14				0		100	0.01	-6.64386			300	SEC14 cytosolic factor	SEC14
High	Master Protein	P40961	Prohibitin-1 OS=Saccharomyces cerevisiae (strain ATCC 204508 / S288c) OX=559292 GN=PHB1 PE=1 SV=2	0.001	2.353	6	2	2	2	287	31.4	8.25	0	2	Pf01145	853033	PHB1				0		100	0.01	-6.64386			300	Prohibitin-1	PHB1
High	Master Protein	P10664	60S ribosomal protein L4-A OS=Saccharomyces cerevisiae (strain ATCC 204508 / S288c) OX=559292 GN=RPL4A PE=1 SV=4	0	146.041	63	23	49	1	362	39.1	10.64	80.84	23	Pf00573, Pf14374	852319	RPL4A	Ribosome	L13a-mediated translational silencing of Ceruloplasmin expression; SRP-dependent cotranslational protein targeting to membrane; Formation of a pool of free 40S subunits; GTP hydrolysis and joining of the 60S ribosomal subunit; Nonsense Mediated Decay (NMD) independent of the Exon Junction Complex (EJC); Nonsense Mediated Decay (NMD) enhanced by the Exon Junction Complex (EJC)		7	0.462	1.342	0.313	-1.67577	27.2	103.1	169.7	60S ribosomal protein L4-A	RPL4A
High	Master Protein	P49626	60S ribosomal protein L4-B OS=Saccharomyces cerevisiae (strain ATCC 204508 / S288c) OX=559292 GN=RPL4B PE=1 SV=2	0	145.981	63	23	49	1	362	39	10.64	80.84	23	Pf00573, Pf14374	851575	RPL4B	Ribosome	L13a-mediated translational silencing of Ceruloplasmin expression; SRP-dependent cotranslational protein targeting to membrane; Formation of a pool of free 40S subunits; GTP hydrolysis and joining of the 60S ribosomal subunit; Nonsense Mediated Decay (NMD) independent of the Exon Junction Complex (EJC); Nonsense Mediated Decay (NMD) enhanced by the Exon Junction Complex (EJC)		7		100	0.01	-6.64386			300	60S ribosomal protein L4-B	RPL4B
High	Master Protein	P0C2I9	Transposon Ty1-PR1 Gag-Pol polyprotein OS=Saccharomyces cerevisiae (strain ATCC 204508 / S288c) OX=559292 GN=TY1B-PR1 PE=3 SV=1	0	134.321	11	14	25	1	1755	198.4	8.25	57.98	14	Pf00665, Pf01021, Pf07727	856257	TY1B-PR1				0	1.455	2.664	0.612	-0.708396	130	42.7	127.3	Transposon Ty1-PR1 Gag-Pol polyprotein	TY1B-PR1
High	Master Protein	P0CX57	Transposon Ty1-A Gag polyprotein OS=Saccharomyces cerevisiae (strain ATCC 204508 / S288c) OX=559292 GN=TY1A-A PE=2 SV=1	0	126.217	38	13	23	1	440	49	7.64	56.43	13	Pf01021	851269; 856258	TY1A-A				0		100	0.01	-6.64386			300	Transposon Ty1-A Gag polyprotein	TY1A-A
High	Master Protein	Q12485	Transposon Ty1-GR2 Gag polyprotein OS=Saccharomyces cerevisiae (strain ATCC 204508 / S288c) OX=559292 GN=TY1A-GR2 PE=2 SV=1	0	110.181	39	13	22	1	440	49	8.19	50.72	13	Pf01021	852929	TY1A-GR2				0				#VALUE!				Transposon Ty1-GR2 Gag polyprotein	TY1A-GR2
High	Master Protein	P50095	Inosine-5'-monophosphate dehydrogenase 3 OS=Saccharomyces cerevisiae (strain ATCC 204508 / S288c) OX=559292 GN=IMD3 PE=1 SV=1	0	62.843	26	10	12	1	523	56.5	7.4	22.04	10	Pf00478, Pf00571	851152	IMD3	Purine metabolism; Metabolic pathways; Biosynthesis of secondary metabolites; Nucleotide metabolism	Neutrophil degranulation; Purine ribonucleoside monophosphate biosynthesis; Azathioprine ADME		7		100	0.01	-6.64386			300	Inosine-5'-monophosphate dehydrogenase 3	IMD3
High	Master Protein	Q02753	60S ribosomal protein L21-A OS=Saccharomyces cerevisiae (strain ATCC 204508 / S288c) OX=559292 GN=RPL21A PE=1 SV=1	0	52.283	58	10	20	1	160	18.2	10.39	42.82	10	Pf01157	852489	RPL21A	Ribosome	L13a-mediated translational silencing of Ceruloplasmin expression; Nonsense Mediated Decay (NMD) independent of the Exon Junction Complex (EJC); Nonsense Mediated Decay (NMD) enhanced by the Exon Junction Complex (EJC); SRP-dependent cotranslational protein targeting to membrane; Formation of a pool of free 40S subunits; GTP hydrolysis and joining of the 60S ribosomal subunit		7	2.521	1.616	1.485	0.570463	117.4	60	122.6	60S ribosomal protein L21-A	RPL21A
High	Master Protein	P51401	60S ribosomal protein L9-B OS=Saccharomyces cerevisiae (strain ATCC 204508 / S288c) OX=559292 GN=RPL9B PE=1 SV=1	0	49.841	52	8	14	1	191	21.6	9.66	23.4	8	Pf00347	855658	RPL9B	Ribosome	Nonsense Mediated Decay (NMD) independent of the Exon Junction Complex (EJC); Nonsense Mediated Decay (NMD) enhanced by the Exon Junction Complex (EJC); L13a-mediated translational silencing of Ceruloplasmin expression; SRP-dependent cotranslational protein targeting to membrane; Formation of a pool of free 40S subunits; GTP hydrolysis and joining of the 60S ribosomal subunit		7				#VALUE!				60S ribosomal protein L9-B	RPL9B
High	Master Protein	Q12672	60S ribosomal protein L21-B OS=Saccharomyces cerevisiae (strain ATCC 204508 / S288c) OX=559292 GN=RPL21B PE=1 SV=1	0	49.566	58	10	20	1	160	18.3	10.39	42.42	10	Pf01157	856026	RPL21B	Ribosome			1		100	0.01	-6.64386			300	60S ribosomal protein L21-B	RPL21B
High	Master Protein	P53221	60S ribosomal protein L26-B OS=Saccharomyces cerevisiae (strain ATCC 204508 / S288c) OX=559292 GN=RPL26B PE=1 SV=2	0	44.07	66	14	19	1	127	14.2	10.46	28.72	14	Pf00467, Pf16906	852922	RPL26B	Ribosome	L13a-mediated translational silencing of Ceruloplasmin expression; SRP-dependent cotranslational protein targeting to membrane; Formation of a pool of free 40S subunits; GTP hydrolysis and joining of the 60S ribosomal subunit; Nonsense Mediated Decay (NMD) independent of the Exon Junction Complex (EJC); Nonsense Mediated Decay (NMD) enhanced by the Exon Junction Complex (EJC)		7		100	0.01	-6.64386			300	60S ribosomal protein L26-B	RPL26B
High	Master Protein	P0C2H9	60S ribosomal protein L31-B OS=Saccharomyces cerevisiae (strain ATCC 204508 / S288c) OX=559292 GN=RPL31B PE=1 SV=1	0	39.501	72	9	12	1	113	13	9.99	23.86	9	Pf01198	851122	RPL31B	Ribosome	L13a-mediated translational silencing of Ceruloplasmin expression; SRP-dependent cotranslational protein targeting to membrane; Formation of a pool of free 40S subunits; GTP hydrolysis and joining of the 60S ribosomal subunit; Nonsense Mediated Decay (NMD) independent of the Exon Junction Complex (EJC); Nonsense Mediated Decay (NMD) enhanced by the Exon Junction Complex (EJC)		7		100	0.01	-6.64386			300	60S ribosomal protein L31-B	RPL31B
High	Master Protein	P19146	ADP-ribosylation factor 2 OS=Saccharomyces cerevisiae (strain ATCC 204508 / S288c) OX=559292 GN=ARF2 PE=1 SV=3	0	37.903	49	8	11	1	181	20.6	7.34	24.01	8	Pf00025	851418	ARF2	Endocytosis	COPI-mediated anterograde transport; COPI-dependent Golgi-to-ER retrograde traffic; Synthesis of PIPs at the Golgi membrane; trans-Golgi Network Vesicle Budding; VxPx cargo-targeting to cilium; Intra-Golgi traffic		7				#VALUE!				ADP-ribosylation factor 2	ARF2
High	Master Protein	P19211	Eukaryotic translation initiation factor 5A-2 OS=Saccharomyces cerevisiae (strain ATCC 204508 / S288c) OX=559292 GN=ANB1 PE=1 SV=3	0	11.918	17	3	9	1	157	17.1	4.96	15.41	3	Pf01287	853506	ANB1		Hypusine synthesis from eIF5A-lysine		1				#VALUE!				Eukaryotic translation initiation factor 5A-2	ANB1
High	Master Protein	P10622	60S acidic ribosomal protein P1-beta OS=Saccharomyces cerevisiae (strain ATCC 204508 / S288c) OX=559292 GN=RPP1B PE=1 SV=3	0	8.127	15	1	1	1	106	10.7	4.01	4.75	1	Pf00428	851427	RPP1B	Ribosome			1		100	0.01	-6.64386			300	60S acidic ribosomal protein P1-beta	RPP1B
High	Master Protein	P38009	Bifunctional purine biosynthesis protein ADE17 OS=Saccharomyces cerevisiae (strain ATCC 204508 / S288c) OX=559292 GN=ADE17 PE=1 SV=2	0	6.112	7	3	3	1	592	65.2	6.55	2.07	3	Pf01808, Pf02142	855149	ADE17	Purine metabolism; One carbon pool by folate; Metabolic pathways; Biosynthesis of secondary metabolites	Purine ribonucleoside monophosphate biosynthesis		5				#VALUE!				Bifunctional purine biosynthesis protein ADE17	ADE17
High	Master Protein	P39990	13 kDa ribonucleoprotein-associated protein OS=Saccharomyces cerevisiae (strain ATCC 204508 / S288c) OX=559292 GN=SNU13 PE=1 SV=1	0	4.773	19	1	1	1	126	13.6	7.85	2.89	1	Pf01248	856687	SNU13	Ribosome biogenesis in eukaryotes; Spliceosome	Major pathway of rRNA processing in the nucleolus and cytosol		3				#VALUE!				13 kDa ribonucleoprotein-associated protein	SNU13
High	Master Protein	P22139	DNA-directed RNA polymerases I, II, and III subunit RPABC5 OS=Saccharomyces cerevisiae (strain ATCC 204508 / S288c) OX=559292 GN=RPB10 PE=1 SV=2	0	4.375	16	1	1	1	70	8.3	7.78	2.1	1	Pf01194	854385	RPB10	RNA polymerase	Formation of the Early Elongation Complex; RNA Polymerase II Pre-transcription Events; Formation of TC-NER Pre-Incision Complex; Dual incision in TC-NER; Gap-filling DNA repair synthesis and ligation in TC-NER; TP53 Regulates Transcription of DNA Repair Genes; RNA polymerase II transcribes snRNA genes; mRNA Capping; RNA Polymerase II Promoter Escape; RNA Polymerase II Transcription Pre-Initiation…		19				#VALUE!				DNA-directed RNA polymerases I, II, and III subunit RPABC5	RPB10
High	Master Protein	P40089	U6 snRNA-associated Sm-like protein LSm5 OS=Saccharomyces cerevisiae (strain ATCC 204508 / S288c) OX=559292 GN=LSM5 PE=1 SV=1	0	4.125	17	1	1	1	93	10.4	4.63	1.74	1	Pf01423	856889	LSM5	RNA degradation; Spliceosome	mRNA decay by 5' to 3' exoribonuclease		3				#VALUE!				U6 snRNA-associated Sm-like protein LSm5	LSM5
High	Master Protein	P20434	DNA-directed RNA polymerases I, II, and III subunit RPABC1 OS=Saccharomyces cerevisiae (strain ATCC 204508 / S288c) OX=559292 GN=RPB5 PE=1 SV=1	0	3.133	14	1	1	1	215	25.1	9.1	0	1	Pf01191, Pf03871	852451	RPB5	RNA polymerase	Formation of the Early Elongation Complex; RNA Polymerase II Pre-transcription Events; Formation of TC-NER Pre-Incision Complex; Dual incision in TC-NER; Gap-filling DNA repair synthesis and ligation in TC-NER; TP53 Regulates Transcription of DNA Repair Genes; RNA polymerase II transcribes snRNA genes; mRNA Capping; RNA Polymerase II Promoter Escape; RNA Polymerase II Transcription Pre-Initiation…	Eukaryotic transcription initiation	20				#VALUE!				DNA-directed RNA polymerases I, II, and III subunit RPABC1	RPB5
High	Master Protein	P53111	NADPH-dependent aldehyde reductase ARI1 OS=Saccharomyces cerevisiae (strain ATCC 204508 / S288c) OX=559292 GN=ARI1 PE=1 SV=1	0.002	2.98	6	2	2	1	347	38.1	5.88	0	2	Pf01370	852720	ARI1				0				#VALUE!				NADPH-dependent aldehyde reductase ARI1	ARI1
High	Master Protein	P18238	ADP,ATP carrier protein 3 OS=Saccharomyces cerevisiae (strain ATCC 204508 / S288c) OX=559292 GN=AAC3 PE=1 SV=1	0.002	2.861	6	2	2	1	307	33.3	9.8	2.47	2	Pf00153	852380	AAC3		Mitochondrial protein import		1				#VALUE!				ADP,ATP carrier protein 3	AAC3
High	Master Protein	P53183	Putative uncharacterized oxidoreductase YGL039W OS=Saccharomyces cerevisiae (strain ATCC 204508 / S288c) OX=559292 GN=YGL039W PE=1 SV=1	0.002	2.795	7	2	2	1	348	38.2	5.96	0	2	Pf01370	852844					0				#VALUE!				Putative uncharacterized oxidoreductase YGL039W	YGL039W
High	Master Protein	P05747	60S ribosomal protein L29 OS=Saccharomyces cerevisiae (strain ATCC 204508 / S288c) OX=559292 GN=RPL29 PE=1 SV=3	0.001	2.17	14	1	1	1	59	6.7	11.31	0	1	Pf01779	850592	RPL29	Ribosome	L13a-mediated translational silencing of Ceruloplasmin expression; Nonsense Mediated Decay (NMD) independent of the Exon Junction Complex (EJC); Nonsense Mediated Decay (NMD) enhanced by the Exon Junction Complex (EJC); SRP-dependent cotranslational protein targeting to membrane; Formation of a pool of free 40S subunits; GTP hydrolysis and joining of the 60S ribosomal subunit		7		100	0.01	-6.64386			300	60S ribosomal protein L29	RPL29
High	Master Protein	Q06406	U6 snRNA-associated Sm-like protein LSm6 OS=Saccharomyces cerevisiae (strain ATCC 204508 / S288c) OX=559292 GN=LSM6 PE=1 SV=2	0.004	1.664	21	1	1	1	86	9.4	5.97	0	1	Pf01423	851984	LSM6	RNA degradation; Spliceosome	mRNA decay by 5' to 3' exoribonuclease		3				#VALUE!				U6 snRNA-associated Sm-like protein LSm6	LSM6
High	Master Protein	P40302	Proteasome subunit alpha type-6 OS=Saccharomyces cerevisiae (strain ATCC 204508 / S288c) OX=559292 GN=PRE5 PE=1 SV=1	0	4.011	9	1	1	1	234	25.6	7.39	0	1	Pf00227, Pf10584	855362	PRE5	Proteasome	Cross-presentation of soluble exogenous antigens (endosomes); TNFR2 non-canonical NF-kB pathway; Ub-specific processing proteases	Proteasome degradation	5				#VALUE!				Proteasome subunit alpha type-6	PRE5
High	Master Protein	Q12040	Broad-specificity phosphatase YOR283W OS=Saccharomyces cerevisiae (strain ATCC 204508 / S288c) OX=559292 GN=YOR283W PE=1 SV=1	0.002	3.054	9	1	1	1	230	26.2	7.96	0	1	Pf00300	854457					0				#VALUE!				Broad-specificity phosphatase YOR283W	YOR283W
High	Master Protein	P36015	Synaptobrevin homolog YKT6 OS=Saccharomyces cerevisiae (strain ATCC 204508 / S288c) OX=559292 GN=YKT6 PE=1 SV=1	0.002	2.632	9	1	1	1	200	22.7	5.69	0	1	Pf00957, Pf13774	853638	YKT6	SNARE interactions in vesicular transport; Autophagy	COPII-mediated vesicle transport; COPI-mediated anterograde transport; Intra-Golgi traffic		5				#VALUE!				Synaptobrevin homolog YKT6	YKT6
High	Master Protein	P32366	V-type proton ATPase subunit d OS=Saccharomyces cerevisiae (strain ATCC 204508 / S288c) OX=559292 GN=VMA6 PE=1 SV=2	0	3.781	8	1	1	1	345	39.8	4.6	0	1	Pf01992	851168	VMA6	Oxidative phosphorylation; Metabolic pathways; Phagosome	ROS and RNS production in phagocytes; Insulin receptor recycling; Transferrin endocytosis and recycling; Amino acids regulate mTORC1		7				#VALUE!				V-type proton ATPase subunit d	VMA6
High	Master Protein	P27999	DNA-directed RNA polymerase II subunit RPB9 OS=Saccharomyces cerevisiae (strain ATCC 204508 / S288c) OX=559292 GN=RPB9 PE=1 SV=1	0.009	1.329	8	1	1	1	122	14.3	7.61	0	1	Pf01096, Pf02150	852810	RPB9	RNA polymerase	Formation of the Early Elongation Complex; RNA Polymerase II Pre-transcription Events; Formation of TC-NER Pre-Incision Complex; Dual incision in TC-NER; Gap-filling DNA repair synthesis and ligation in TC-NER; TP53 Regulates Transcription of DNA Repair Genes; RNA polymerase II transcribes snRNA genes; mRNA Capping; RNA Polymerase II Promoter Escape; RNA Polymerase II Transcription Pre-Initiation…		15		100	0.01	-6.64386			300	DNA-directed RNA polymerase II subunit RPB9	RPB9
High	Master Protein	P40893	Regulation of enolase protein 1 OS=Saccharomyces cerevisiae (strain ATCC 204508 / S288c) OX=559292 GN=REE1 PE=1 SV=1	0	5.318	7	1	1	1	198	22	6.39	2.62	1	Pf07081	853238	REE1				0		100	0.01	-6.64386			300	Regulation of enolase protein 1	REE1
High	Master Protein	P25719	Peptidyl-prolyl cis-trans isomerase C, mitochondrial OS=Saccharomyces cerevisiae (strain ATCC 204508 / S288c) OX=559292 GN=CPR3 PE=1 SV=1	0	5.01	7	1	1	1	182	19.9	8.7	2.32	1	Pf00160	854897	CPR3		Neutrophil degranulation		1				#VALUE!				Peptidyl-prolyl cis-trans isomerase C, mitochondrial	CPR3
High	Master Protein	P49435	Adenine phosphoribosyltransferase 1 OS=Saccharomyces cerevisiae (strain ATCC 204508 / S288c) OX=559292 GN=APT1 PE=1 SV=3	0	4.003	7	1	1	1	187	20.6	5.1	1.76	1	Pf00156	854986	APT1	Purine metabolism; Metabolic pathways; Nucleotide metabolism	Neutrophil degranulation; Purine salvage		5				#VALUE!				Adenine phosphoribosyltransferase 1	APT1
High	Master Protein	P38912	Eukaryotic translation initiation factor 1A OS=Saccharomyces cerevisiae (strain ATCC 204508 / S288c) OX=559292 GN=TIF11 PE=1 SV=1	0	3.575	7	1	1	1	153	17.4	4.83	2.28	1	Pf01176	855302	TIF11		L13a-mediated translational silencing of Ceruloplasmin expression; Formation of a pool of free 40S subunits; Translation initiation complex formation; Formation of the ternary complex, and subsequently, the 43S complex; Ribosomal scanning and start codon recognition		5		100	0.01	-6.64386			300	Eukaryotic translation initiation factor 1A	TIF11
High	Master Protein	Q12522	Eukaryotic translation initiation factor 6 OS=Saccharomyces cerevisiae (strain ATCC 204508 / S288c) OX=559292 GN=TIF6 PE=1 SV=1	0.001	2.101	7	1	1	1	245	26.4	4.64	0	1	Pf01912	856126	TIF6	Ribosome biogenesis in eukaryotes			1		100	0.01	-6.64386			300	Eukaryotic translation initiation factor 6	TIF6
High	Master Protein	P61830	Histone H3 OS=Saccharomyces cerevisiae (strain ATCC 204508 / S288c) OX=559292 GN=HHT2 PE=1 SV=2	0.001	2.05	7	1	1	1	136	15.3	11.43	0	1	Pf00125	852295; 855700	HHT1; HHT2				0		100	0.01	-6.64386			300	Histone H3	HHT2
High	Master Protein	O13563	26S proteasome regulatory subunit RPN13 OS=Saccharomyces cerevisiae (strain ATCC 204508 / S288c) OX=559292 GN=RPN13 PE=1 SV=1	0.001	1.998	7	1	1	1	156	17.9	4.53	0	1	Pf04683	851140	RPN13	Proteasome			1				#VALUE!				26S proteasome regulatory subunit RPN13	RPN13
High	Master Protein	Q05933	Actin-related protein 2/3 complex subunit 3 OS=Saccharomyces cerevisiae (strain ATCC 204508 / S288c) OX=559292 GN=ARC18 PE=1 SV=1	0.007	1.572	7	1	1	1	178	20.6	7.97	0	1	Pf04062	851085	ARC18	Autophagy; Endocytosis	Regulation of actin dynamics for phagocytic cup formation; RHO GTPases Activate WASPs and WAVEs		4				#VALUE!				Actin-related protein 2/3 complex subunit 3	ARC18

## Sheet: Both in WT and ubc9-2KR (34)
Protein FDR Confidence: Combined	Master	Accession	Description	Exp. q-value: Combined	Sum PEP Score	Coverage [%]	# Peptides	# PSMs	# Unique Peptides	# AAs	MW [kDa]	calc. pI	Score Sequest HT: Sequest HT	# Peptides (by Search Engine): Sequest HT	Pfam IDs	Entrez Gene ID	Gene Symbol	KEGG Pathways	Reactome Pathways	WikiPathways	# Protein Pathway Groups	Abundance Ratio: (2kr) / (Notag)	Abundance Ratio: (WT) / (Notag)	Abundance Ratio: (2kr) / (WT)	2kr/wt log2	Abundances (Grouped): 2kr	Abundances (Grouped): Notag	Abundances (Grouped): WT	Protein name	Gene name
High	Master Protein	P16140	V-type proton ATPase subunit B OS=Saccharomyces cerevisiae (strain ATCC 204508 / S288c) OX=559292 GN=VMA2 PE=1 SV=2	0	73.144	40	13	16	13	517	57.7	5.07	29.03	13	Pf00006, Pf02874	852424	VMA2	Oxidative phosphorylation; Metabolic pathways; Phagosome	ROS and RNS production in phagocytes; Insulin receptor recycling; Transferrin endocytosis and recycling; Amino acids regulate mTORC1		7	100	100	0.851	-0.232769	23.3		276.7	V-type proton ATPase subunit B	VMA2
High	Master Protein	Q99247	DUB-associated factor 1 OS=Saccharomyces cerevisiae (strain ATCC 204508 / S288c) OX=559292 GN=DUF1 PE=1 SV=1	0	40.353	15	12	12	12	1116	125.3	6.68	15	12	Pf11816	854066	DUF1		Recognition of DNA damage by PCNA-containing replication complex		1	100	100	6.237	2.64085	206.1		93.9	DUB-associated factor 1	DUF1
High	Master Protein	P32327	Pyruvate carboxylase 2 OS=Saccharomyces cerevisiae (strain ATCC 204508 / S288c) OX=559292 GN=PYC2 PE=1 SV=2	0	34.57	13	11	12	11	1180	130.1	6.51	13.48	11	Pf00289, Pf00364, Pf00682, Pf02436, Pf02785, Pf02786	852519	PYC2	Citrate cycle (TCA cycle); Pyruvate metabolism; Metabolic pathways; Carbon metabolism; Biosynthesis of amino acids			5	100	100	1.489	0.574344	92		208	Pyruvate carboxylase 2	PYC2
High	Master Protein	P22137	Clathrin heavy chain OS=Saccharomyces cerevisiae (strain ATCC 204508 / S288c) OX=559292 GN=CHC1 PE=1 SV=1	0	33.751	8	10	10	10	1653	187.1	5.24	8.29	10	Pf00637, Pf01394, Pf09268, Pf13838	852666	CHC1	Endocytosis	VLDLR internalisation and degradation; LDL clearance; Recycling pathway of L1; RHOV GTPase cycle; Lysosome Vesicle Biogenesis; Clathrin-mediated endocytosis; RHOU GTPase cycle		8	100	100	4.202	2.07108	184.9		115.1	Clathrin heavy chain	CHC1
High	Master Protein	P32449	Phospho-2-dehydro-3-deoxyheptonate aldolase, tyrosine-inhibited OS=Saccharomyces cerevisiae (strain ATCC 204508 / S288c) OX=559292 GN=ARO4 PE=1 SV=2	0	40.954	32	8	8	8	370	39.7	6.95	19.54	8	Pf00793	852551	ARO4	Phenylalanine, tyrosine and tryptophan biosynthesis; Metabolic pathways; Biosynthesis of secondary metabolites; Biosynthesis of amino acids			4	100	100	0.837	-0.2567	67.3		232.7	Phospho-2-dehydro-3-deoxyheptonate aldolase, tyrosine-inhibited	ARO4
High	Master Protein	P15496	Isopentenyl-diphosphate delta-isomerase OS=Saccharomyces cerevisiae (strain ATCC 204508 / S288c) OX=559292 GN=IDI1 PE=1 SV=2	0	35.792	25	8	8	8	288	33.3	4.98	18.91	8	Pf00293	855986	IDI1	Terpenoid backbone biosynthesis; Metabolic pathways; Biosynthesis of secondary metabolites	Cholesterol biosynthesis	Cholesterol biosynthesis	5	100	100	3.367	1.75146	191.1		108.9	Isopentenyl-diphosphate delta-isomerase	IDI1
High	Master Protein	P37302	Aminopeptidase Y OS=Saccharomyces cerevisiae (strain ATCC 204508 / S288c) OX=559292 GN=APE3 PE=1 SV=1	0	34.571	23	8	8	8	537	60.1	5.31	17.54	8	Pf02225, Pf04389	852589	APE3				0	100	100	3.435	1.78031	103.2		196.8	Aminopeptidase Y	APE3
High	Master Protein	P15303	Protein transport protein SEC23 OS=Saccharomyces cerevisiae (strain ATCC 204508 / S288c) OX=559292 GN=SEC23 PE=1 SV=1	0	24.075	13	8	8	8	768	85.3	5.66	8.26	8	Pf00626, Pf04810, Pf04811, Pf04815, Pf08033	856311	SEC23	Protein processing in endoplasmic reticulum	COPII-mediated vesicle transport; Cargo concentration in the ER; Antigen Presentation: Folding, assembly and peptide loading of class I MHC		4	100	100	1.439	0.525067	96.9		203.1	Protein transport protein SEC23	SEC23
High	Master Protein	P38911	Peptidyl-prolyl cis-trans isomerase OS=Saccharomyces cerevisiae (strain ATCC 204508 / S288c) OX=559292 GN=FPR3 PE=1 SV=2	0	23.06	13	6	6	6	411	46.5	4.46	13.24	6	Pf00254, Pf17800	854901	FPR3				0	100	100	5.868	2.55287	136.4		163.6	Peptidyl-prolyl cis-trans isomerase	FPR3
High	Master Protein	P34167	Eukaryotic translation initiation factor 4B OS=Saccharomyces cerevisiae (strain ATCC 204508 / S288c) OX=559292 GN=TIF3 PE=1 SV=1	0	17.932	21	6	6	6	436	48.5	5.29	12.59	6		856292	TIF3				0	100	100	1.807	0.853597	193.1		106.9	Eukaryotic translation initiation factor 4B	TIF3
High	Master Protein	P49167	60S ribosomal protein L38 OS=Saccharomyces cerevisiae (strain ATCC 204508 / S288c) OX=559292 GN=RPL38 PE=1 SV=1	0	17.288	53	6	7	6	78	8.8	10.93	4.5	6	Pf01781	851035	RPL38	Ribosome	L13a-mediated translational silencing of Ceruloplasmin expression; SRP-dependent cotranslational protein targeting to membrane; Formation of a pool of free 40S subunits; GTP hydrolysis and joining of the 60S ribosomal subunit; Nonsense Mediated Decay (NMD) independent of the Exon Junction Complex (EJC); Nonsense Mediated Decay (NMD) enhanced by the Exon Junction Complex (EJC)		7	100	100	0.631	-0.664288	18.5		281.5	60S ribosomal protein L38	RPL38
High	Master Protein	P40037	Protein HMF1 OS=Saccharomyces cerevisiae (strain ATCC 204508 / S288c) OX=559292 GN=HMF1 PE=1 SV=1	0	27.032	57	5	5	5	129	13.9	5.41	12.61	5	Pf01042	856785	HMF1				0	100	100	0.505	-0.985645	45.5		254.5	Protein HMF1	HMF1
High	Master Protein	Q03161	Glucose-6-phosphate 1-epimerase OS=Saccharomyces cerevisiae (strain ATCC 204508 / S288c) OX=559292 GN=YMR099C PE=1 SV=1	0	15.359	24	5	5	5	297	33.9	6.13	4	5	Pf01263	855125		Glycolysis / Gluconeogenesis; Metabolic pathways; Biosynthesis of secondary metabolites			3	100	100	4.418	2.14339	269.5		30.5	Glucose-6-phosphate 1-epimerase	YMR099C
High	Master Protein	Q12449	Hsp90 co-chaperone AHA1 OS=Saccharomyces cerevisiae (strain ATCC 204508 / S288c) OX=559292 GN=AHA1 PE=1 SV=1	0	14.725	17	5	5	5	350	39.4	7.47	6.14	5	Pf08327, Pf09229	851800	AHA1				0	100	100	2.806	1.48852	41		259	Hsp90 co-chaperone AHA1	AHA1
High	Master Protein	P38625	GMP synthase [glutamine-hydrolyzing] OS=Saccharomyces cerevisiae (strain ATCC 204508 / S288c) OX=559292 GN=GUA1 PE=1 SV=4	0	12.256	10	5	5	5	525	58.4	6.49	6.66	5	Pf00117, Pf00958, Pf02540	855257	GUA1	Purine metabolism; Metabolic pathways; Nucleotide metabolism	Purine ribonucleoside monophosphate biosynthesis; Azathioprine ADME		5	100	100	1.681	0.74932	152		148	GMP synthase [glutamine-hydrolyzing]	GUA1
High	Master Protein	P16649	General transcriptional corepressor TUP1 OS=Saccharomyces cerevisiae (strain ATCC 204508 / S288c) OX=559292 GN=TUP1 PE=1 SV=2	0	11.845	8	5	5	5	713	78.3	5.68	4.2	5	Pf00400, Pf08581	850445	TUP1	MAPK signaling pathway; Cell cycle			2	100	100	2.056	1.03984	175.4		124.6	General transcriptional corepressor TUP1	TUP1
High	Master Protein	P02400	60S acidic ribosomal protein P2-beta OS=Saccharomyces cerevisiae (strain ATCC 204508 / S288c) OX=559292 GN=RPP2B PE=1 SV=2	0	27.574	82	4	5	4	110	11	4.15	11.16	4	Pf00428	851990	RPP2B	Ribosome	L13a-mediated translational silencing of Ceruloplasmin expression; SRP-dependent cotranslational protein targeting to membrane; Formation of a pool of free 40S subunits; GTP hydrolysis and joining of the 60S ribosomal subunit; Nonsense Mediated Decay (NMD) independent of the Exon Junction Complex (EJC); Nonsense Mediated Decay (NMD) enhanced by the Exon Junction Complex (EJC)		7	100	100	0.501	-0.997117	41.9		258.1	60S acidic ribosomal protein P2-beta	RPP2B
High	Master Protein	P05319	60S acidic ribosomal protein P2-alpha OS=Saccharomyces cerevisiae (strain ATCC 204508 / S288c) OX=559292 GN=RPP2A PE=1 SV=1	0	22.631	66	4	5	4	106	10.7	4.04	6.5	4	Pf00428	854118	RPP2A	Ribosome			1	100	100	3.006	1.58785	82.7		217.3	60S acidic ribosomal protein P2-alpha	RPP2A
High	Master Protein	P00890	Citrate synthase, mitochondrial OS=Saccharomyces cerevisiae (strain ATCC 204508 / S288c) OX=559292 GN=CIT1 PE=1 SV=2	0	10.265	11	4	4	4	479	53.3	8.29	3.92	4	Pf00285	855732	CIT1	Citrate cycle (TCA cycle); Glyoxylate and dicarboxylate metabolism; Metabolic pathways; Biosynthesis of secondary metabolites; Carbon metabolism; 2-Oxocarboxylic acid metabolism; Biosynthesis of amino acids	Citric acid cycle (TCA cycle)		8	100		3.333	1.73682	300		90	Citrate synthase, mitochondrial	CIT1
High	Master Protein	P12709	Glucose-6-phosphate isomerase OS=Saccharomyces cerevisiae (strain ATCC 204508 / S288c) OX=559292 GN=PGI1 PE=1 SV=3	0	9.536	12	4	4	4	554	61.3	6.46	3.91	4	Pf00342	852495	PGI1	Glycolysis / Gluconeogenesis; Pentose phosphate pathway; Starch and sucrose metabolism; Amino sugar and nucleotide sugar metabolism; Metabolic pathways; Biosynthesis of secondary metabolites; Carbon metabolism; Biosynthesis of nucleotide sugars	Neutrophil degranulation; Glycolysis; Gluconeogenesis; TP53 Regulates Metabolic Genes		12	100	100	2.832	1.50182	132.6		167.4	Glucose-6-phosphate isomerase	PGI1
High	Master Protein	P34730	Protein BMH2 OS=Saccharomyces cerevisiae (strain ATCC 204508 / S288c) OX=559292 GN=BMH2 PE=1 SV=3	0	89.842	49	13	22	3	273	31	4.88	53.26	13	Pf00244	851676	BMH2	MAPK signaling pathway			1	100	100	0.239	-2.06492	26.3		273.7	Protein BMH2	BMH2
High	Master Protein	P22149	Iron-regulated transcriptional activator AFT1 OS=Saccharomyces cerevisiae (strain ATCC 204508 / S288c) OX=559292 GN=AFT1 PE=1 SV=2	0	11.927	6	3	3	3	690	77.6	6.89	4.27	3	Pf08731	852809	AFT1				0	100	100	4.531	2.17983	210.6		89.4	Iron-regulated transcriptional activator AFT1	AFT1
High	Master Protein	P10964	DNA-directed RNA polymerase I subunit RPA190 OS=Saccharomyces cerevisiae (strain ATCC 204508 / S288c) OX=559292 GN=RPA190 PE=1 SV=2	0	8.105	2	3	4	3	1664	186.3	7.08	5.97	3	Pf00623, Pf04983, Pf04997, Pf04998, Pf05000	854519	RPA190	RNA polymerase	RNA Polymerase I Promoter Escape; RNA Polymerase I Transcription Initiation	Eukaryotic transcription initiation	4	100	100	4.398	2.13685	190.6		109.4	DNA-directed RNA polymerase I subunit RPA190	RPA190
High	Master Protein	Q12464	RuvB-like protein 2 OS=Saccharomyces cerevisiae (strain ATCC 204508 / S288c) OX=559292 GN=RVB2 PE=1 SV=1	0	7.108	6	3	3	3	471	51.6	5.31	2.11	3	Pf06068, Pf17856	855841	RVB2				0	100	100	4.547	2.18492	222		78	RuvB-like protein 2	RVB2
High	Master Protein	P32798	Cobalt uptake protein COT1 OS=Saccharomyces cerevisiae (strain ATCC 204508 / S288c) OX=559292 GN=COT1 PE=1 SV=2	0	16.116	10	2	4	2	439	48.1	6.29	5.46	2	Pf01545	854494	COT1		Metal ion SLC transporters		1	100	100	0.949	-0.07552	146.1		153.9	Cobalt uptake protein COT1	COT1
High	Master Protein	P20436	DNA-directed RNA polymerases I, II, and III subunit RPABC3 OS=Saccharomyces cerevisiae (strain ATCC 204508 / S288c) OX=559292 GN=RPB8 PE=1 SV=1	0	13.762	10	2	3	2	146	16.5	4.7	8.21	2	Pf03870	854399	RPB8	RNA polymerase	Formation of the Early Elongation Complex; RNA Polymerase II Pre-transcription Events; Formation of TC-NER Pre-Incision Complex; Dual incision in TC-NER; Gap-filling DNA repair synthesis and ligation in TC-NER; TP53 Regulates Transcription of DNA Repair Genes; RNA polymerase II transcribes snRNA genes; mRNA Capping; RNA Polymerase II Promoter Escape; RNA Polymerase II Transcription Pre-Initiation…	Eukaryotic transcription initiation	20	100	100	19.833	4.30983	285.6		14.4	DNA-directed RNA polymerases I, II, and III subunit RPABC3	RPB8
High	Master Protein	Q12491	Transposon Ty2-B Gag-Pol polyprotein OS=Saccharomyces cerevisiae (strain ATCC 204508 / S288c) OX=559292 GN=TY2B-B PE=3 SV=1	0	9.374	2	3	3	2	1770	202.1	7.66	4.38	3	Pf00665, Pf01021, Pf07727	852175	TY2B-B				0	100	100	0.472	-1.08314	61.6		238.4	Transposon Ty2-B Gag-Pol polyprotein	TY2B-B
High	Master Protein	P39976	D-2-hydroxyglutarate--pyruvate transhydrogenase DLD3 OS=Saccharomyces cerevisiae (strain ATCC 204508 / S288c) OX=559292 GN=DLD3 PE=1 SV=1	0	8.527	5	2	2	2	496	55.2	6.89	4.79	2	Pf01565, Pf02913	856638	DLD3	Pyruvate metabolism; Metabolic pathways			2	100	100	0.997	-0.00433459	149.8		150.2	D-2-hydroxyglutarate--pyruvate transhydrogenase DLD3	DLD3
High	Master Protein	P05318	60S acidic ribosomal protein P1-alpha OS=Saccharomyces cerevisiae (strain ATCC 204508 / S288c) OX=559292 GN=RPP1A PE=1 SV=4	0	6.049	28	2	2	2	106	10.9	3.88	4.61	2	Pf00428	851478	RPP1A	Ribosome	L13a-mediated translational silencing of Ceruloplasmin expression; SRP-dependent cotranslational protein targeting to membrane; Formation of a pool of free 40S subunits; GTP hydrolysis and joining of the 60S ribosomal subunit; Nonsense Mediated Decay (NMD) independent of the Exon Junction Complex (EJC); Nonsense Mediated Decay (NMD) enhanced by the Exon Junction Complex (EJC)		7	100	100	2.442	1.28806	195.7		104.3	60S acidic ribosomal protein P1-alpha	RPP1A
High	Master Protein	P53834	Hsp90 co-chaperone HCH1 OS=Saccharomyces cerevisiae (strain ATCC 204508 / S288c) OX=559292 GN=HCH1 PE=1 SV=1	0	5.82	12	2	3	2	153	17.2	4.78	2.35	2	Pf09229	855440	HCH1				0	100	100	9.024	3.17377	291.3		8.7	Hsp90 co-chaperone HCH1	HCH1
High	Master Protein	P38555	GTP-binding protein YPT31/YPT8 OS=Saccharomyces cerevisiae (strain ATCC 204508 / S288c) OX=559292 GN=YPT31 PE=1 SV=3	0	3.956	8	2	2	2	223	24.5	5.08	2.04	2	Pf00071	856753	YPT31	Endocytosis	RAB geranylgeranylation		2	100	100	1.675	0.744161	148.1		151.9	GTP-binding protein YPT31/YPT8	YPT31
High	Master Protein	P41811	Coatomer subunit beta' OS=Saccharomyces cerevisiae (strain ATCC 204508 / S288c) OX=559292 GN=SEC27 PE=1 SV=1	0	3.668	2	2	2	2	889	99.4	4.74	2.3	2	Pf00400, Pf04053	852740	SEC27		COPI-mediated anterograde transport; COPI-dependent Golgi-to-ER retrograde traffic		2	100	100	2.529	1.33857	110.1		189.9	Coatomer subunit beta'	SEC27
High	Master Protein	P38754	60S ribosomal protein L14-B OS=Saccharomyces cerevisiae (strain ATCC 204508 / S288c) OX=559292 GN=RPL14B PE=1 SV=1	0	30.314	54	8	11	1	138	15.1	10.93	7.46	8	Pf01929	856388	RPL14B	Ribosome	L13a-mediated translational silencing of Ceruloplasmin expression; SRP-dependent cotranslational protein targeting to membrane; Formation of a pool of free 40S subunits; GTP hydrolysis and joining of the 60S ribosomal subunit; Nonsense Mediated Decay (NMD) independent of the Exon Junction Complex (EJC); Nonsense Mediated Decay (NMD) enhanced by the Exon Junction Complex (EJC)		7	100	100	1.312	0.391768	170.2		129.8	60S ribosomal protein L14-B	RPL14B
High	Master Protein	P40046	Vacuolar transporter chaperone 1 OS=Saccharomyces cerevisiae (strain ATCC 204508 / S288c) OX=559292 GN=VTC1 PE=1 SV=3	0.001	2.436	8	1	1	1	129	14.4	10.52	0	1	Pf02656	856803	VTC1				0	100	100	2.16	1.11103	205		95	Vacuolar transporter chaperone 1	VTC1

## Sheet: KEGG pathway_WT only
Classification	Sub-classification	Gene name	KEGG Pathways
Metabolism	Carbohydrate metabolism	ACO1	Citrate cycle (TCA cycle); Glyoxylate and dicarboxylate metabolism; Metabolic pathways; Biosynthesis of secondary metabolites; Carbon metabolism; 2-Oxocarboxylic acid metabolism; Biosynthesis of amino acids
		ADH6	Glycolysis / Gluconeogenesis; Pentose and glucuronate interconversions; Ascorbate and aldarate metabolism; Glycerolipid metabolism; Pyruvate metabolism; Metabolic pathways; Biosynthesis of secondary metabolites; Biosynthesis of cofactors
		TDH1	Glycolysis / Gluconeogenesis; Metabolic pathways; Biosynthesis of secondary metabolites; Carbon metabolism; Biosynthesis of amino acids
		IDP1	Citrate cycle (TCA cycle); Glutathione metabolism; Metabolic pathways; Biosynthesis of secondary metabolites; Carbon metabolism; 2-Oxocarboxylic acid metabolism; Biosynthesis of amino acids; Peroxisome
		LAT1	Glycolysis / Gluconeogenesis; Citrate cycle (TCA cycle); Pyruvate metabolism; Metabolic pathways; Biosynthesis of secondary metabolites; Carbon metabolism
		SOL3	Pentose phosphate pathway; Metabolic pathways; Biosynthesis of secondary metabolites; Carbon metabolism
		LSC1	Citrate cycle (TCA cycle); Propanoate metabolism; Metabolic pathways; Biosynthesis of secondary metabolites; Carbon metabolism
		TPI1	Glycolysis / Gluconeogenesis; Fructose and mannose metabolism; Inositol phosphate metabolism; Metabolic pathways; Biosynthesis of secondary metabolites; Carbon metabolism; Biosynthesis of amino acids
		GLO2	Pyruvate metabolism; Metabolic pathways
		ZWF1	Pentose phosphate pathway; Glutathione metabolism; Metabolic pathways; Biosynthesis of secondary metabolites; Carbon metabolism
		HXK1	Glycolysis / Gluconeogenesis; Fructose and mannose metabolism; Galactose metabolism; Starch and sucrose metabolism; Amino sugar and nucleotide sugar metabolism; Metabolic pathways; Biosynthesis of secondary metabolites; Carbon metabolism; Biosynthesis of nucleotide sugars
		LSC2	Citrate cycle (TCA cycle); Propanoate metabolism; Metabolic pathways; Biosynthesis of secondary metabolites; Carbon metabolism
		TPS1	Starch and sucrose metabolism; Metabolic pathways; Biosynthesis of secondary metabolites
		ARA1	Ascorbate and aldarate metabolism; Metabolic pathways
		DAK1	Fructose and mannose metabolism; Glycerolipid metabolism; Methane metabolism; Metabolic pathways; Carbon metabolism
		PMI40	Fructose and mannose metabolism; Amino sugar and nucleotide sugar metabolism; Metabolic pathways; Biosynthesis of secondary metabolites; Biosynthesis of cofactors; Biosynthesis of nucleotide sugars
	Energy metabolism	IPP1	Oxidative phosphorylation
		ATP1	Oxidative phosphorylation; Metabolic pathways
		VMA5	Oxidative phosphorylation; Metabolic pathways; Phagosome
		VMA13	Oxidative phosphorylation; Metabolic pathways; Phagosome
		VMA6	Oxidative phosphorylation; Metabolic pathways; Phagosome
	Lipid metabolism	FAS2	Fatty acid biosynthesis; Metabolic pathways; Fatty acid metabolism
		ERG10	Fatty acid degradation; Valine, leucine and isoleucine degradation; Lysine degradation; Tryptophan metabolism; Pyruvate metabolism; Glyoxylate and dicarboxylate metabolism; Butanoate metabolism; Terpenoid backbone biosynthesis; Metabolic pathways; Biosynthesis of secondary metabolites; Carbon metabolism; Fatty acid metabolism
		ERG6	Steroid biosynthesis; Metabolic pathways; Biosynthesis of secondary metabolites
		FAA1	Fatty acid biosynthesis; Fatty acid degradation; Metabolic pathways; Fatty acid metabolism; Peroxisome
		GPD1	Glycerophospholipid metabolism; Biosynthesis of secondary metabolites; MAPK signaling pathway
	Nucleotide metabolism	RNR2	Purine metabolism; Pyrimidine metabolism; Glutathione metabolism; Metabolic pathways; Nucleotide metabolism
		ADE13	Purine metabolism; Alanine, aspartate and glutamate metabolism; Metabolic pathways; Biosynthesis of secondary metabolites; Nucleotide metabolism; Biosynthesis of cofactors
		FUR1	Pyrimidine metabolism; Metabolic pathways; Nucleotide metabolism
		YMR226C	Pyrimidine metabolism; Glycine, serine and threonine metabolism; Metabolic pathways
		URA5	Pyrimidine metabolism; Metabolic pathways; Biosynthesis of cofactors
		ADE16	Purine metabolism; One carbon pool by folate; Metabolic pathways; Biosynthesis of secondary metabolites
		URA7	Pyrimidine metabolism; Metabolic pathways; Nucleotide metabolism; Biosynthesis of cofactors
		ADE57	Purine metabolism; Metabolic pathways; Biosynthesis of secondary metabolites
		IMD3	Purine metabolism; Metabolic pathways; Biosynthesis of secondary metabolites; Nucleotide metabolism
		ADE17	Purine metabolism; One carbon pool by folate; Metabolic pathways; Biosynthesis of secondary metabolites
		APT1	Purine metabolism; Metabolic pathways; Nucleotide metabolism
	Amino acid metabolism	LYS20	Lysine biosynthesis; Pyruvate metabolism; Metabolic pathways; Biosynthesis of secondary metabolites; 2-Oxocarboxylic acid metabolism; Biosynthesis of amino acids
		MET6	Cysteine and methionine metabolism; Selenocompound metabolism; Metabolic pathways; Biosynthesis of secondary metabolites; Biosynthesis of amino acids
		LEU4	Valine, leucine and isoleucine biosynthesis; Pyruvate metabolism; Metabolic pathways; Biosynthesis of secondary metabolites; 2-Oxocarboxylic acid metabolism; Biosynthesis of amino acids
		GLY1	Glycine, serine and threonine metabolism; Metabolic pathways; Biosynthesis of secondary metabolites; Biosynthesis of amino acids
		ILV2	Valine, leucine and isoleucine biosynthesis; Butanoate metabolism; C5-Branched dibasic acid metabolism; Pantothenate and CoA biosynthesis; Metabolic pathways; Biosynthesis of secondary metabolites; 2-Oxocarboxylic acid metabolism; Biosynthesis of amino acids
		LYS12	Lysine biosynthesis; Metabolic pathways; Biosynthesis of secondary metabolites; 2-Oxocarboxylic acid metabolism; Biosynthesis of amino acids
		HIS4	Histidine metabolism; Metabolic pathways; Biosynthesis of secondary metabolites; Biosynthesis of amino acids
		HIS1	Histidine metabolism; Metabolic pathways; Biosynthesis of secondary metabolites; Biosynthesis of amino acids
		THR1	Glycine, serine and threonine metabolism; Metabolic pathways; Biosynthesis of secondary metabolites; Biosynthesis of amino acids
		AAT2	Arginine biosynthesis; Alanine, aspartate and glutamate metabolism; Cysteine and methionine metabolism; Arginine and proline metabolism; Tyrosine metabolism; Phenylalanine metabolism; Phenylalanine, tyrosine and tryptophan biosynthesis; Metabolic pathways; Biosynthesis of secondary metabolites; Carbon metabolism; 2-Oxocarboxylic acid metabolism; Biosynthesis of amino acids
		BAT2	Cysteine and methionine metabolism; Valine, leucine and isoleucine degradation; Valine, leucine and isoleucine biosynthesis; Pantothenate and CoA biosynthesis; Metabolic pathways; Biosynthesis of secondary metabolites; 2-Oxocarboxylic acid metabolism; Biosynthesis of amino acids; Biosynthesis of cofactors
		SPE3	Cysteine and methionine metabolism; Arginine and proline metabolism; Glutathione metabolism; Metabolic pathways
		GAD1	Alanine, aspartate and glutamate metabolism; beta-Alanine metabolism; Taurine and hypotaurine metabolism; Butanoate metabolism; Metabolic pathways; Biosynthesis of secondary metabolites
		BAT1	Cysteine and methionine metabolism; Valine, leucine and isoleucine degradation; Valine, leucine and isoleucine biosynthesis; Pantothenate and CoA biosynthesis; Metabolic pathways; Biosynthesis of secondary metabolites; 2-Oxocarboxylic acid metabolism; Biosynthesis of amino acids; Biosynthesis of cofactors
	Metabolism of other amino acids	DUG1	Glutathione metabolism; Metabolic pathways
		MES1	Selenocompound metabolism; Aminoacyl-tRNA biosynthesis; Metabolic pathways
	Metabolism of cofactors and vitamins	ADE3	One carbon pool by folate; Metabolic pathways; Biosynthesis of cofactors
		NFS1	Thiamine metabolism; Metabolic pathways; Biosynthesis of cofactors; Sulfur relay system
		NPT1	Nicotinate and nicotinamide metabolism; Metabolic pathways; Biosynthesis of cofactors
		FOL2	Folate biosynthesis; Metabolic pathways; Biosynthesis of cofactors
	Metabolism of terpenoids and polyketides	ERG20	Terpenoid backbone biosynthesis; Metabolic pathways; Biosynthesis of secondary metabolites
		MVD1	Terpenoid backbone biosynthesis; Metabolic pathways; Biosynthesis of secondary metabolites
	Glycan biosynthesis and metabolism	KTR1	Other types of O-glycan biosynthesis
Genetic information processing	Translation	THS1	Aminoacyl-tRNA biosynthesis
		FRS1	Aminoacyl-tRNA biosynthesis
		FRS2	Aminoacyl-tRNA biosynthesis
		YNL247W	Aminoacyl-tRNA biosynthesis
		ALA1	Aminoacyl-tRNA biosynthesis
		TYS1	Aminoacyl-tRNA biosynthesis
		GRS1	Aminoacyl-tRNA biosynthesis
		HTS1	Aminoacyl-tRNA biosynthesis
		GLN4	Aminoacyl-tRNA biosynthesis; Metabolic pathways
		SUP35	mRNA surveillance pathway
		SUP45	mRNA surveillance pathway
		POM152	Nucleocytoplasmic transport
		DBP5	Nucleocytoplasmic transport; mRNA surveillance pathway
		SUB2	Nucleocytoplasmic transport; mRNA surveillance pathway; Spliceosome
		RPL25	Ribosome
		RPL8A	Ribosome
		RPL15B	Ribosome
		RPL9A	Ribosome
		RPL14A	Ribosome
		RPL4A	Ribosome
		RPL4B	Ribosome
		RPL21A	Ribosome
		RPL9B	Ribosome
		RPL21B	Ribosome
		RPL26B	Ribosome
		RPL31B	Ribosome
		RPP1B	Ribosome
		RPL29	Ribosome
		RPS31	Ribosome; Ubiquitin mediated proteolysis
		NUG1	Ribosome biogenesis in eukaryotes
		GAR1	Ribosome biogenesis in eukaryotes
		TIF6	Ribosome biogenesis in eukaryotes
		SNU13	Ribosome biogenesis in eukaryotes; Spliceosome
		TIF34	Nucleocytoplasmic transport; RNA transport
		PRT1	Nucleocytoplasmic transport; RNA transport
		FUN12	Nucleocytoplasmic transport; RNA transport
		TIF4631	Nucleocytoplasmic transport; RNA transport
		RPG1	Nucleocytoplasmic transport; RNA transport
		TIF4632	Nucleocytoplasmic transport; RNA transport
		TIF5	Nucleocytoplasmic transport; RNA transport
		TIF11	Nucleocytoplasmic transport; RNA transport
	Transcription	TOA2	Basal transcription factors
		SPT5	Basal transcription factors
		RPC53	RNA polymerase
		RPC40	RNA polymerase
		RPA135	RNA polymerase
		RPB10	RNA polymerase
		RPB5	RNA polymerase
		RPB9	RNA polymerase
		DBP2	Spliceosome
	Folding, sorting and degradation	RPN11	Proteasome
		RPN2	Proteasome
		PRE6	Proteasome
		PRE5	Proteasome
		RPN13	Proteasome
		SSS1	Protein export; Protein processing in endoplasmic reticulum; Phagosome
		CDC48	Protein processing in endoplasmic reticulum
		HSP26	Protein processing in endoplasmic reticulum
		SEC24	Protein processing in endoplasmic reticulum
		SAR1	Protein processing in endoplasmic reticulum
		DHH1	RNA degradation
		MOT2	RNA degradation
		LSM5	RNA degradation; Spliceosome
		LSM6	RNA degradation; Spliceosome
		YKT6	SNARE interactions in vesicular transport; Autophagy
		UBA2	Ubiquitin mediated proteolysis
		UBC4	Ubiquitin mediated proteolysis; Protein processing in endoplasmic reticulum
	Replication and repair	POL30	DNA replication; Base excision repair; Nucleotide excision repair; Mismatch repair
Cellular process	Transport and catabolism	ARF1	Endocytosis
		ARF2	Endocytosis
		TUB2	Phagosome
		ARP3	Autophagy; Endocytosis
		ARC18	Autophagy; Endocytosis
Environmental information processing	Signal transcduction	ROM2	MAPK signaling pathway
Others		DYS1
		FSH1
		NOP53
		YNL134C
		ZUO1
		SRV2
		MMT1
		MAP2
		BOP3
		EGD1
		ABF1
		YHB1
		HNT1
		YLR179C
		CPR6
		MMT2
		YRB1
		SFM1
		CAM1
		CDC3
		GVP36
		TY1A-DR2
		COF1
		PSP2
		NAP1
		STM1
		PAA1
		TSA1
		AIP1
		PET9
		YPL225W
		PYP1
		CCT5
		RDI1
		ZRC1
		PHO88
		DET1
		TUF1
		HHF2
		RTN1
		SWC3
		RSC2
		NCL1
		YPR1
		SFP1
		PUB1
		RIM1
		GDI1
		COP1
		YHR097C
		TOM40
		MRPL25
		NGR1
		RRB1
		TDA3
		DBP9
		DOG2
		HEK2
		YTM1
		NCP1
		RRP5
		PTC3
		RET2
		CCT2
		SEC14
		PHB1
		TY1B-PR1
		TY1A-A
		TY1A-GR2
		ANB1
		ARI1
		AAC3
		YGL039W
		YOR283W
		REE1
		CPR3
		HHT2

## Sheet: KEGG pathway_Both in WT and 2KR
Classification	Sub-classification	Gene name	KEGG Pathways
Metabolism	Carbohydrate metabolism	CIT1	Citrate cycle (TCA cycle); Glyoxylate and dicarboxylate metabolism; Metabolic pathways; Biosynthesis of secondary metabolites; Carbon metabolism; 2-Oxocarboxylic acid metabolism; Biosynthesis of amino acids
		PGI1	Glycolysis / Gluconeogenesis; Pentose phosphate pathway; Starch and sucrose metabolism; Amino sugar and nucleotide sugar metabolism; Metabolic pathways; Biosynthesis of secondary metabolites; Carbon metabolism; Biosynthesis of nucleotide sugars
		PYC2	Citrate cycle (TCA cycle); Pyruvate metabolism; Metabolic pathways; Carbon metabolism; Biosynthesis of amino acids
		YMR099C	Glycolysis / Gluconeogenesis; Metabolic pathways; Biosynthesis of secondary metabolites
		DLD3	Pyruvate metabolism; Metabolic pathways
	Energy metabolism	VMA2	Oxidative phosphorylation; Metabolic pathways; Phagosome
	Nucleotide metabolism	GUA1	Purine metabolism; Metabolic pathways; Nucleotide metabolism
	Amino acid metabolism	ARO4	Phenylalanine, tyrosine and tryptophan biosynthesis; Metabolic pathways; Biosynthesis of secondary metabolites; Biosynthesis of amino acids
	Metabolism of terpenoids and polyketides	IDI1	Terpenoid backbone biosynthesis; Metabolic pathways; Biosynthesis of secondary metabolites
Genetic information processing	Translation	RPP2A	Ribosome
		RPP1A	Ribosome
		RPL14B	Ribosome
		RPL38	Ribosome
		RPP2B	Ribosome
	Transcription	RPB8	RNA polymerase
		RPA190	RNA polymerase
	Folding, sorting and degradation	SEC23	Protein processing in endoplasmic reticulum
Cellular process	transport and catabolism	CHC1	Endocytosis
		YPT31	Endocytosis
Environmental information processing	MAPK signaling pathway	TUP1	MAPK signaling pathway; Cell cycle
		BMH2	MAPK signaling pathway
Others		HCH1
		DUF1
		FPR3
		RVB2
		AFT1
		APE3
		AHA1
		SEC27
		VTC1
		TIF3
		COT1
		HMF1
		TY2B-B
