# Supplementary material for: Auto-sumoylation of the Ubc9 E2 SUMO-conjugating Enzyme Extends Cellular Lifespan
Source: Research Square preprint supplement (doi:10.21203/rs.3.rs-4016606/v1), 2024-03-21
Supplement: Supplementary file 2 [file 5b28a8579827fd7dd45867e4.xlsx]

## Sheet: ulp2D vs WT 
genes	GeneVer	GeneID	GeneType	GeneName	mean_ulp2D	mean_WT	log2FoldChange	lfcSE	stat	pvalue	padj
YIL130W	YIL130W	YIL130W	CDS	ASG1	2126.58	1953.86	0.121865	0.0500403	2.43534	0.0148776	0.023508
YAL008W	YAL008W	YAL008W	CDS	FUN14	5758.15	4897.87	0.232579	0.0429756	5.41188	6.2365e-08	1.60073e-07
YBR255W	YBR255W	YBR255W	CDS	MTC4	1895.68	2055.12	-0.117457	0.0494276	-2.37634	0.0174856	0.027332
YGR164W	YGR164W	YGR164W	CDS	YGR164W	45.5396	44.3128	0.0364345	0.274202	0.132874	0.894293	0.923872
YGR131W	YGR131W	YGR131W	CDS	FHN1	205.003	186.371	0.136968	0.179641	0.762454	0.445789	0.530842
YNL003C	YNL003C	YNL003C	CDS	PET8	1418.54	1082.52	0.390899	0.0626582	6.23859	4.41544e-10	1.27744e-09
YBR135W	YBR135W	YBR135W	CDS	CKS1	878.859	978.02	-0.152805	0.0799658	-1.91087	0.0560208	0.081307
YBR160W	YBR160W	YBR160W	CDS	CDC28	2441.65	2366.27	0.044912	0.0624298	0.7194	0.471894	0.556591
YJL082W	YJL082W	YJL082W	CDS	IML2	3427.58	2502.69	0.454288	0.0538463	8.43674	3.26301e-17	1.37448e-16
YJL142C	YJL142C	YJL142C	CDS	IRC9	417.047	286.055	0.538734	0.114768	4.69412	2.67752e-06	6.10107e-06
YPL191C	YPL191C	YPL191C	CDS	YPL191C	528.019	616.791	-0.225056	0.0784055	-2.87041	0.00409945	0.00695423
YGL215W	YGL215W	YGL215W	CDS	CLG1	15314.2	18048.3	-0.237109	0.040543	-5.84834	4.96499e-09	1.35504e-08
YKL074C	YKL074C	YKL074C	CDS	MUD2	1196.03	1345.78	-0.169112	0.0682442	-2.47804	0.0132105	0.0210403
HRA1	HRA1	HRA1	noncoding_exon	HRA1	17.9133	4.70137	1.91959	0.553292	3.4694	0.00052162	0.000980353
PWR1	PWR1	PWR1	noncoding_exon	PWR1	45.4001	14.6021	1.63358	0.406419	4.01945	5.83332e-05	0.000119227
YKL096W-A	YKL096W-A	YKL096W-A	CDS	CWP2	57215.5	78370.5	-0.453884	0.10351	-4.38492	1.16027e-05	2.51344e-05
YIL124W	YIL124W	YIL124W	CDS	AYR1	3888.81	5429.89	-0.481191	0.0437667	-10.9945	4.06328e-28	2.52025e-27
Q0010	Q0010	Q0010	CDS	Q0010	43.0648	15.1647	1.50486	1.92925	0.780024	0.435377	0.520299
YPL039W	YPL039W	YPL039W	CDS	YPL039W	1100.06	990.979	0.151847	0.0695294	2.18392	0.0289681	0.0438098
YNL170W	YNL170W	YNL170W	CDS	YNL170W	202.562	110.976	0.865914	0.152651	5.67252	1.40712e-08	3.73805e-08
YKL048C	YKL048C	YKL048C	CDS	ELM1	943.045	1063.23	-0.175064	0.0654823	-2.67346	0.00750736	0.0123107
YJL179W	YJL179W	YJL179W	CDS	PFD1	415.746	591.025	-0.506944	0.101653	-4.98699	6.13286e-07	1.46384e-06
Q0080	Q0080	Q0080	CDS	ATP8	135.896	283.915	-1.0633	0.197412	-5.38623	7.19505e-08	1.83529e-07
YDR316W-B	YDR316W-B	YDR316W-B	CDS	YDR316W-B	13.6799	25.9801	-0.928419	0.540444	-1.71788	0.085818	0.120862
YKL083W	YKL083W	YKL083W	CDS	YKL083W	40.6042	53.5784	-0.40554	0.350487	-1.15708	0.247241	0.316251
YBR152W	YBR152W	YBR152W	CDS	SPP381	403.621	374.174	0.109763	0.114805	0.956086	0.339029	0.417156
YKL029C	YKL029C	YKL029C	CDS	MAE1	3945.11	4536.98	-0.201129	0.0652211	-3.08381	0.00204368	0.00359977
YPL166W	YPL166W	YPL166W	CDS	ATG29	607.341	732.908	-0.269274	0.0699752	-3.84813	0.000119022	0.000237365
YLR220W	YLR220W	YLR220W	CDS	CCC1	5367.53	3626.68	0.564656	0.0469623	12.0236	2.67073e-33	1.90915e-32
YHR025W	YHR025W	YHR025W	CDS	THR1	4027.93	3943.37	0.0314979	0.0574076	0.548672	0.583231	0.664917
YOL034W	YOL034W	YOL034W	CDS	SMC5	1154.27	997.118	0.20875	0.0656903	3.1778	0.001484	0.00265477
YBL008W	YBL008W	YBL008W	CDS	HIR1	888.03	851.286	0.0595747	0.0712272	0.836404	0.402928	0.485934
YIL062C	YIL062C	YIL062C	CDS	ARC15	4500.71	4980.44	-0.145865	0.0586715	-2.48613	0.0129142	0.0205886
Q0092	Q0092	Q0092	CDS	Q0092	29.1351	9.17955	1.66276	0.570527	2.91442	0.00356353	0.00609246
YOL116W	YOL116W	YOL116W	CDS	MSN1	1957.59	1369.89	0.514584	0.0507736	10.1349	3.86904e-24	2.12934e-23
YDR196C	YDR196C	YDR196C	CDS	CAB5	2292.77	3150.26	-0.456734	0.0510055	-8.95462	3.40915e-19	1.55212e-18
YNL255C	YNL255C	YNL255C	CDS	GIS2	4575.76	7161.25	-0.645908	0.042497	-15.1989	3.59572e-52	4.19942e-51
YNR032W	YNR032W	YNR032W	CDS	PPG1	972.102	846.28	0.201513	0.0774771	2.60094	0.009297	0.015079
YNR045W	YNR045W	YNR045W	CDS	PET494	2665.2	3019.64	-0.180597	0.0497248	-3.63193	0.00028131	0.000543025
YML105C	YML105C	YML105C	CDS	SEC65	2055.09	2722.04	-0.406344	0.0555953	-7.30897	2.69197e-13	9.42864e-13
YNL288W	YNL288W	YNL288W	CDS	CAF40	1239.85	1186.6	0.0644153	0.0711544	0.90529	0.365312	0.445338
RDN25-2	RDN25-2	RDN25-2	noncoding_exon	RDN25-2	15319	6942.89	1.14165	0.226146	5.04826	4.45861e-07	1.07673e-06
YIL004C	YIL004C	YIL004C	CDS	BET1	797.604	907.168	-0.184621	0.0830277	-2.22361	0.0261746	0.0397658
YNR018W	YNR018W	YNR018W	CDS	RCF2	2923.62	5689.78	-0.959761	0.061132	-15.6998	1.51693e-55	1.92974e-54
YPL144W	YPL144W	YPL144W	CDS	POC4	319.593	291.765	0.132317	0.148319	0.892111	0.372334	0.453185
YFR047C	YFR047C	YFR047C	CDS	BNA6	4150.86	5096.58	-0.295845	0.0431395	-6.85785	6.99033e-12	2.24462e-11
YER087C-B	YER087C-B	YER087C-B	CDS	SBH1	1751.98	1844.76	-0.0728068	0.0586859	-1.24062	0.214747	0.278875
YHR078W	YHR078W	YHR078W	CDS	YHR078W	2256.17	2098.08	0.105258	0.0490873	2.1443	0.0320085	0.048054
RDN5-1	RDN5-1	RDN5-1	noncoding_exon	RDN5-1	23.5127	8.33726	1.50197	0.539127	2.78594	0.00533725	0.00893894
RDN5-2	RDN5-2	RDN5-2	noncoding_exon	RDN5-2	5.25993	2.36267	1.12558	1.10249	1.02094	0.307283	0.383223
YLR355C	YLR355C	YLR355C	CDS	ILV5	19842.4	18054.3	0.136453	0.0391477	3.48558	0.000491067	0.000925278
YGR099W	YGR099W	YGR099W	CDS	TEL2	1143.62	970.197	0.236349	0.0707727	3.33955	0.000839156	0.00154187
YLR300W	YLR300W	YLR300W	CDS	EXG1	15043.6	8352.33	0.849223	0.044588	19.046	7.09019e-81	1.36413e-79
YBL003C	YBL003C	YBL003C	CDS	HTA2	2273	2479.78	-0.125834	0.0601853	-2.09078	0.0365481	0.0544131
YJR140C	YJR140C	YJR140C	CDS	HIR3	1147.5	1159.37	-0.0160652	0.0592246	-0.271259	0.786191	0.84008
YOR033C	YOR033C	YOR033C	CDS	EXO1	1668.61	1093.33	0.611278	0.0619815	9.86226	6.06675e-23	3.16905e-22
YOR062C	YOR062C	YOR062C	CDS	YOR062C	926.789	680.207	0.443033	0.0780838	5.67382	1.39648e-08	3.7126e-08
YBR043C	YBR043C	YBR043C	CDS	QDR3	1883.61	1933.37	-0.0371511	0.0564251	-0.658415	0.510272	0.595047
YHR112C	YHR112C	YHR112C	CDS	YHR112C	2694.54	3423.36	-0.345268	0.0405294	-8.51894	1.61019e-17	6.87382e-17
YLR011W	YLR011W	YLR011W	CDS	LOT6	519.063	561.749	-0.113538	0.091132	-1.24586	0.212814	0.276571
YIL044C	YIL044C	YIL044C	CDS	AGE2	1235.83	1268.38	-0.0367169	0.0678802	-0.540907	0.588571	0.668931
YKR103W	YKR103W	YKR103W	CDS	NFT1	540.748	346.075	0.645977	0.0987579	6.54102	6.11002e-11	1.86505e-10
YLR133W	YLR133W	YLR133W	CDS	CKI1	3990.59	2697.48	0.563641	0.0493226	11.4276	3.04271e-30	1.99159e-29
YER121W	YER121W	YER121W	CDS	YER121W	877.062	1117.08	-0.350072	0.0724459	-4.83219	1.3504e-06	3.14165e-06
YCR046C	YCR046C	YCR046C	CDS	IMG1	2690.09	3365.82	-0.322478	0.0617431	-5.2229	1.76143e-07	4.3732e-07
YKL204W	YKL204W	YKL204W	CDS	EAP1	3246.78	4736.61	-0.544231	0.0529463	-10.2789	8.77132e-25	4.93228e-24
YOR266W	YOR266W	YOR266W	CDS	PNT1	471.094	897.989	-0.929112	0.0973942	-9.5397	1.43244e-21	7.16632e-21
YDR421W	YDR421W	YDR421W	CDS	ARO80	1851.27	2061.26	-0.154953	0.0609167	-2.54368	0.0109691	0.0176516
YGL171W	YGL171W	YGL171W	CDS	ROK1	714.148	1264.87	-0.823133	0.0686238	-11.9949	3.77997e-33	2.68013e-32
YPR194C	YPR194C	YPR194C	CDS	OPT2	836.215	1549.84	-0.893005	0.068379	-13.0596	5.60036e-39	4.7295e-38
YGR019W	YGR019W	YGR019W	CDS	UGA1	5186.4	7421.3	-0.516308	0.0406411	-12.7041	5.61137e-37	4.44329e-36
YNL208W	YNL208W	YNL208W	CDS	YNL208W	23438.8	26994.5	-0.203625	0.0572594	-3.55618	0.00037628	0.000718016
YJL188C	YJL188C	YJL188C	CDS	BUD19	13.9549	13.3811	0.0584479	0.524959	0.111338	0.911348	0.937249
tD%28GUC%29O	tD%28GUC%29O	tD%28GUC%29O	noncoding_exon	tD%28GUC%29O	2.32248	4.50216	-0.954249	1.05833	-0.901654	0.367241	0.447455
RDN5-5	RDN5-5	RDN5-5	noncoding_exon	RDN5-5	5.18358	1.99011	1.3668	1.05776	1.29216	0.196301	0.257169
RUF23	RUF23	RUF23	noncoding_exon	RUF23	36.5204	12.8413	1.50797	0.457464	3.29637	0.000979422	0.00179018
YNL229C	YNL229C	YNL229C	CDS	URE2	3207.49	3762.09	-0.229031	0.0410635	-5.57749	2.44018e-08	6.37806e-08
YNL277W	YNL277W	YNL277W	CDS	MET2	1141.73	1304.55	-0.19137	0.0768321	-2.49076	0.0127469	0.0203438
YMR040W	YMR040W	YMR040W	CDS	YET2	1490.5	1315.23	0.178462	0.0664853	2.68423	0.00726981	0.0119352
YDR077W	YDR077W	YDR077W	CDS	SED1	264726	253846	0.0605517	0.0443509	1.36528	0.172164	0.228722
YMR266W	YMR266W	YMR266W	CDS	RSN1	4589.9	4260.24	0.106838	0.0444624	2.40288	0.0162664	0.0255348
YKR064W	YKR064W	YKR064W	CDS	OAF3	1259.16	1608.41	-0.35412	0.0633208	-5.59248	2.23848e-08	5.87285e-08
YPL089C	YPL089C	YPL089C	CDS	RLM1	7250.49	5158.24	0.491187	0.0418041	11.7497	7.08449e-32	4.86989e-31
YGR277C	YGR277C	YGR277C	CDS	CAB4	802.12	719.607	0.157063	0.090033	1.7445	0.0810717	0.114709
YDL139C	YDL139C	YDL139C	CDS	SCM3	639.102	586.201	0.124379	0.0790148	1.57412	0.11546	0.158954
YDR246W	YDR246W	YDR246W	CDS	TRS23	2900.46	2698.67	0.105652	0.057201	1.84703	0.0647423	0.0930563
YOR288C	YOR288C	YOR288C	CDS	MPD1	954.401	921.925	0.0479104	0.0782443	0.612317	0.540328	0.624847
RUF5-1	RUF5-1	RUF5-1	noncoding_exon	RUF5-1	51.936	11.6437	2.16214	0.439707	4.91722	8.77818e-07	2.06559e-06
YCR028C	YCR028C	YCR028C	CDS	FEN2	1392.05	1322.11	0.0738849	0.0629993	1.17279	0.24088	0.309248
snR128	snR128	snR128	noncoding_exon	SNR128	260.479	124.729	1.06235	0.180489	5.88593	3.95822e-09	1.08664e-08
YPR070W	YPR070W	YPR070W	CDS	MED1	945.411	1202.38	-0.349826	0.0630218	-5.55088	2.84233e-08	7.40704e-08
YOR141C	YOR141C	YOR141C	CDS	ARP8	2622.88	2493.16	0.073235	0.0440979	1.66073	0.0967667	0.135029
YPL280W	YPL280W	YPL280W	CDS	HSP32	73.5531	60.0799	0.28881	0.275709	1.04752	0.294861	0.369715
YBL106C	YBL106C	YBL106C	CDS	SRO77	878.707	1092.92	-0.316016	0.0744714	-4.24345	2.2011e-05	4.64987e-05
YGL044C	YGL044C	YGL044C	CDS	RNA15	994.364	1271.15	-0.356643	0.0623511	-5.71992	1.06573e-08	2.86051e-08
YER107C	YER107C	YER107C	CDS	GLE2	1194.23	1526.94	-0.35423	0.0628594	-5.63528	1.74771e-08	4.60732e-08
snR189	snR189	snR189	noncoding_exon	SNR189	182.503	61.8831	1.5566	0.204112	7.62619	2.418e-14	8.87872e-14
YER076W-A	YER076W-A	YER076W-A	CDS	YER076W-A	57.8373	103.776	-0.830836	0.205359	-4.04578	5.21495e-05	0.000107216
YGR259C	YGR259C	YGR259C	CDS	YGR259C	268.12	232.573	0.200753	0.126261	1.58999	0.111838	0.154454
YEL047C	YEL047C	YEL047C	CDS	FRD1	3066.52	4120.09	-0.425722	0.0563135	-7.55986	4.03505e-14	1.46166e-13
YKL093W	YKL093W	YKL093W	CDS	MBR1	6312.18	9018.8	-0.515126	0.0391314	-13.164	1.41388e-39	1.20864e-38
YPR016C	YPR016C	YPR016C	CDS	TIF6	3627.09	4057.78	-0.161449	0.0461887	-3.49541	0.000473331	0.00089272
YLR157C	YLR157C	YLR157C	CDS	ASP3-2	0	0
YDL055C	YDL055C	YDL055C	CDS	PSA1	17988.7	20011.6	-0.153896	0.0312023	-4.9322	8.13074e-07	1.92101e-06
YML009C	YML009C	YML009C	CDS	MRPL39	1077.87	1720.71	-0.673659	0.0788998	-8.53816	1.3638e-17	5.84343e-17
YML072C	YML072C	YML072C	CDS	TCB3	7856.84	9405.47	-0.259614	0.0436131	-5.95265	2.63834e-09	7.31778e-09
YDR142C	YDR142C	YDR142C	CDS	PEX7	1208.04	1131.61	0.0935972	0.0579626	1.61478	0.106357	0.147264
YFL044C	YFL044C	YFL044C	CDS	OTU1	1841.32	1789.05	0.041564	0.0579682	0.717014	0.473366	0.558161
RDN37-2	RDN37-2	RDN37-2	noncoding_exon	RDN37-2	0	0
snR24	snR24	snR24	noncoding_exon	SNR24	21.2657	9.60195	1.1243	0.531304	2.11611	0.0343358	0.0513603
YKL019W	YKL019W	YKL019W	CDS	RAM2	2326.35	2652.64	-0.18821	0.0657212	-2.86377	0.00418632	0.0070947
RDN37-1	RDN37-1	RDN37-1	noncoding_exon	RDN37-1	0	0
YBL085W	YBL085W	YBL085W	CDS	BOI1	2793.57	2143	0.382629	0.0562441	6.80301	1.02456e-11	3.25992e-11
snR30	snR30	snR30	noncoding_exon	SNR30	6600.31	2045.25	1.69097	0.0780218	21.673	3.68579e-104	1.04217e-102
YDR166C	YDR166C	YDR166C	CDS	SEC5	2032.34	2107.71	-0.0532772	0.0493453	-1.07968	0.280284	0.353427
YHR212W-A	YHR212W-A	YHR212W-A	CDS	YHR212W-A	0	0
YDR082W	YDR082W	YDR082W	CDS	STN1	1043.01	1292	-0.311066	0.0692806	-4.48995	7.12408e-06	1.57153e-05
YDR348C	YDR348C	YDR348C	CDS	PAL1	3178.25	3144.68	0.0151146	0.0452511	0.334016	0.738367	0.799745
YKL182W	YKL182W	YKL182W	CDS	FAS1	20008.6	28648.5	-0.517876	0.0375915	-13.7764	3.53258e-43	3.27209e-42
YDR333C	YDR333C	YDR333C	CDS	RQC1	1849.85	1485.74	0.315212	0.0591456	5.32943	9.85227e-08	2.49035e-07
YKL018C-A	YKL018C-A	YKL018C-A	CDS	YKL018C-A	753.417	999.067	-0.408286	0.0832595	-4.90378	9.40096e-07	2.20545e-06
YPL027W	YPL027W	YPL027W	CDS	SMA1	20.7868	20.0524	0.0362469	0.587184	0.0617301	0.950778	0.968953
YKL135C	YKL135C	YKL135C	CDS	APL2	2748.11	3409.95	-0.313064	0.0492733	-6.35362	2.10307e-10	6.19478e-10
YLR363C	YLR363C	YLR363C	CDS	NMD4	700.18	529.724	0.399541	0.0894259	4.46785	7.90105e-06	1.73617e-05
snR32	snR32	snR32	noncoding_exon	SNR32	144.278	70.4904	1.03266	0.277963	3.71508	0.000203136	0.000397729
YDR179C	YDR179C	YDR179C	CDS	CSN9	560.527	607.302	-0.1177	0.115119	-1.02242	0.306581	0.382555
YML089C	YML089C	YML089C	CDS	YML089C	284.577	220.32	0.373336	0.113677	3.28419	0.00102276	0.00186647
YLR431C	YLR431C	YLR431C	CDS	ATG23	1986.13	1119.19	0.826965	0.0594238	13.9164	5.03582e-44	4.81783e-43
YKR046C	YKR046C	YKR046C	CDS	PET10	7350.13	12884.1	-0.809445	0.0544374	-14.8693	5.21873e-50	5.87865e-49
YJR005W	YJR005W	YJR005W	CDS	APL1	2458.26	2110.59	0.219952	0.0461002	4.77117	1.83161e-06	4.22874e-06
YJL116C	YJL116C	YJL116C	CDS	NCA3	1100.13	826.236	0.412673	0.0877935	4.7005	2.59525e-06	5.9194e-06
YER030W	YER030W	YER030W	CDS	CHZ1	3513.77	4532.78	-0.367144	0.0558004	-6.5796	4.71725e-11	1.45133e-10
YIR026C	YIR026C	YIR026C	CDS	YVH1	676.402	1073.77	-0.664715	0.0967419	-6.87102	6.37462e-12	2.04974e-11
YJR072C	YJR072C	YJR072C	CDS	NPA3	3966.21	4468.2	-0.172467	0.043976	-3.92184	8.78768e-05	0.000177328
YEL030C-A	YEL030C-A	YEL030C-A	CDS	YEL030C-A	17.0629	9.56015	0.823043	0.521228	1.57905	0.114325	0.157485
YKR039W	YKR039W	YKR039W	CDS	GAP1	6771.83	6806.97	-0.00712352	0.0466457	-0.152715	0.878623	0.910701
YGL003C	YGL003C	YGL003C	CDS	CDH1	2209.6	1729.42	0.351688	0.0562363	6.25375	4.00712e-10	1.16413e-09
YPL009C	YPL009C	YPL009C	CDS	RQC2	11004.5	10671.4	0.0442345	0.0548049	0.807127	0.419593	0.503862
YDR268W	YDR268W	YDR268W	CDS	MSW1	683.809	1054.54	-0.621133	0.0731479	-8.49147	2.04041e-17	8.65224e-17
snR34	snR34	snR34	noncoding_exon	SNR34	210.056	88.6386	1.23888	0.195467	6.33809	2.32628e-10	6.82064e-10
YDL117W	YDL117W	YDL117W	CDS	CYK3	1410.29	1142.15	0.305323	0.0716877	4.25907	2.05279e-05	4.34841e-05
YMR131C	YMR131C	YMR131C	CDS	RRB1	2482.41	3080.41	-0.31087	0.04979	-6.24361	4.27574e-10	1.23908e-09
YMR293C	YMR293C	YMR293C	CDS	HER2	782.812	957.678	-0.290965	0.0684721	-4.24939	2.14352e-05	4.53372e-05
YJL214W	YJL214W	YJL214W	CDS	HXT8	82.803	53.3271	0.626036	0.250847	2.49568	0.0125715	0.0200868
YIL105C	YIL105C	YIL105C	CDS	SLM1	3986.86	2919.79	0.44996	0.0509371	8.83363	1.01329e-18	4.51903e-18
YML126C	YML126C	YML126C	CDS	ERG13	4844.04	6871.31	-0.504163	0.0412278	-12.2287	2.18323e-34	1.62728e-33
snR40	snR40	snR40	noncoding_exon	SNR40	25.0006	12.1484	1.05355	0.467293	2.25458	0.0241594	0.0369292
YIL150C	YIL150C	YIL150C	CDS	MCM10	468.641	804.829	-0.779148	0.0873652	-8.91829	4.73536e-19	2.14057e-18
snR44	snR44	snR44	noncoding_exon	SNR44	539.559	217.809	1.31266	0.139052	9.44005	3.7259e-21	1.84551e-20
YGL250W	YGL250W	YGL250W	CDS	RMR1	762.494	993.256	-0.382165	0.0770005	-4.96316	6.93568e-07	1.64814e-06
YBR212W	YBR212W	YBR212W	CDS	NGR1	9066.84	7507.58	0.272714	0.0374954	7.27327	3.50885e-13	1.21677e-12
YJR109C	YJR109C	YJR109C	CDS	CPA2	7864.22	5108.58	0.621895	0.0380829	16.33	6.03643e-60	8.29891e-59
YLR254C	YLR254C	YLR254C	CDS	NDL1	2843.06	2487.83	0.192999	0.0658949	2.9289	0.00340167	0.00583144
YGR085C	YGR085C	YGR085C	CDS	RPL11B	4684.61	3698.35	0.341359	0.0465139	7.33886	2.15418e-13	7.56399e-13
YPL105C	YPL105C	YPL105C	CDS	SYH1	7332.08	5592.7	0.390955	0.0581298	6.72555	1.74931e-11	5.49086e-11
YGR145W	YGR145W	YGR145W	CDS	ENP2	973.443	1429.3	-0.554737	0.0774301	-7.16435	7.81545e-13	2.66e-12
YGR110W	YGR110W	YGR110W	CDS	CLD1	2260.4	1896.06	0.253111	0.0502878	5.03325	4.82236e-07	1.16056e-06
snR47	snR47	snR47	noncoding_exon	SNR47	34.4376	15.7696	1.12271	0.510814	2.19788	0.0279576	0.0423732
YGL154C	YGL154C	YGL154C	CDS	LYS5	1158.35	857.898	0.436077	0.0750553	5.81007	6.24462e-09	1.695e-08
YOR010C	YOR010C	YOR010C	CDS	TIR2	725.234	412.685	0.818678	0.104657	7.82247	5.17957e-15	1.95641e-14
YDL215C	YDL215C	YDL215C	CDS	GDH2	30741.5	34532.2	-0.167759	0.0363966	-4.60919	4.04232e-06	9.10695e-06
YKL099C	YKL099C	YKL099C	CDS	UTP11	708.446	999.771	-0.498391	0.0821081	-6.06993	1.27965e-09	3.59497e-09
YDR315C	YDR315C	YDR315C	CDS	IPK1	833.37	946.377	-0.182208	0.0867097	-2.10136	0.0356093	0.0530947
YLR394W	YLR394W	YLR394W	CDS	CST9	2477.16	1632.61	0.600027	0.0583639	10.2808	8.60218e-25	4.84107e-24
tS%28CGA%29C	tS%28CGA%29C	tS%28CGA%29C	noncoding_exon	SUP61	0	0
YNL151C	YNL151C	YNL151C	CDS	RPC31	781.75	1373.12	-0.813334	0.0809049	-10.053	8.91434e-24	4.84496e-23
YNR066C	YNR066C	YNR066C	CDS	YNR066C	639.701	887.366	-0.470388	0.0829752	-5.66903	1.43611e-08	3.81216e-08
YKL052C	YKL052C	YKL052C	CDS	ASK1	1322.58	1140.44	0.214269	0.0638582	3.35539	0.000792519	0.00145925
YHR006W	YHR006W	YHR006W	CDS	STP2	3852.3	3444.56	0.160923	0.0435095	3.69856	0.000216824	0.000423343
YMR232W	YMR232W	YMR232W	CDS	FUS2	519.366	270.709	0.94283	0.104962	8.98254	2.64575e-19	1.2085e-18
YNL083W	YNL083W	YNL083W	CDS	SAL1	1102.08	1086.75	0.0192058	0.0727171	0.264117	0.79169	0.844663
YGR038C-A	YGR038C-A	YGR038C-A	CDS	YGR038C-A	6.36103	6.8052	-0.111287	0.671857	-0.16564	0.86844	0.903334
YGR038C-B	YGR038C-B	YGR038C-B	CDS	YGR038C-B	86.798	113.887	-0.394093	0.218689	-1.80207	0.0715344	0.101958
YER168C	YER168C	YER168C	CDS	CCA1	1722.79	1608.53	0.0999722	0.0597389	1.67349	0.0942317	0.13186
YPL265W	YPL265W	YPL265W	CDS	DIP5	15129.6	20967	-0.470746	0.0571371	-8.23889	1.73819e-16	7.06197e-16
YOR227W	YOR227W	YOR227W	CDS	HER1	6839.65	6550.28	0.0622631	0.0370882	1.67879	0.0931937	0.130512
YOR081C	YOR081C	YOR081C	CDS	TGL5	2073.02	2365.53	-0.189149	0.0486211	-3.89027	0.000100131	0.0002013
YEL026W	YEL026W	YEL026W	CDS	SNU13	2479.23	1632.04	0.603184	0.0524981	11.4896	1.48738e-30	9.80913e-30
YGR050C	YGR050C	YGR050C	CDS	YGR050C	287.2	198.907	0.531957	0.150391	3.53715	0.000404466	0.000769698
YDR021W	YDR021W	YDR021W	CDS	FAL1	389.298	497.557	-0.356177	0.118289	-3.01108	0.0026032	0.00451807
YGL063W	YGL063W	YGL063W	CDS	PUS2	364.9	403.17	-0.141619	0.0998888	-1.41777	0.156258	0.209625
YPL212C	YPL212C	YPL212C	CDS	PUS1	1128.61	1293.74	-0.195302	0.0646078	-3.02288	0.0025038	0.00435422
YOL157C	YOL157C	YOL157C	CDS	IMA2	761.801	497.33	0.618489	0.093461	6.61761	3.65044e-11	1.12958e-10
YOR345C	YOR345C	YOR345C	CDS	YOR345C	11.76	19.1178	-0.703556	0.664051	-1.05949	0.289376	0.363294
YPR095C	YPR095C	YPR095C	CDS	SYT1	1652.62	1720.75	-0.0605113	0.0584627	-1.03504	0.30065	0.376027
YOR310C	YOR310C	YOR310C	CDS	NOP58	6287.1	5584.26	0.17086	0.0606292	2.81811	0.00483072	0.00812566
YMR056C	YMR056C	YMR056C	CDS	AAC1	3793.14	3085.73	0.298106	0.0648167	4.59922	4.24076e-06	9.53251e-06
YOL128C	YOL128C	YOL128C	CDS	YGK3	414.977	303.56	0.452372	0.104955	4.31015	1.63142e-05	3.48756e-05
YGL236C	YGL236C	YGL236C	CDS	MTO1	1287.5	1497.53	-0.215901	0.0705669	-3.05952	0.00221691	0.00388627
YHR133C	YHR133C	YHR133C	CDS	NSG1	1373.8	1016.15	0.434183	0.0761876	5.69886	1.20608e-08	3.22702e-08
YDR017C	YDR017C	YDR017C	CDS	KCS1	2808.99	2625.52	0.0962805	0.0438267	2.19684	0.0280315	0.0424761
YIL090W	YIL090W	YIL090W	CDS	ICE2	1886.5	2477.58	-0.393693	0.0557727	-7.05887	1.67859e-12	5.60655e-12
YBR183W	YBR183W	YBR183W	CDS	YPC1	3004.76	1539.9	0.96402	0.0541038	17.818	5.12529e-71	8.34383e-70
YOL048C	YOL048C	YOL048C	CDS	RRT8	3485.63	2015.61	0.789471	0.0426913	18.4925	2.37189e-76	4.2694e-75
YML039W	YML039W	YML039W	CDS	YML039W	167.374	138.677	0.270333	0.297586	0.908419	0.363657	0.443707
YCR007C	YCR007C	YCR007C	CDS	YCR007C	1099.39	777.004	0.502092	0.0778747	6.44743	1.13762e-10	3.40118e-10
YGR290W	YGR290W	YGR290W	CDS	YGR290W	7.45063	5.62174	0.36448	0.674405	0.540447	0.588889	0.669075
YEL004W	YEL004W	YEL004W	CDS	YEA4	619.195	782.661	-0.336109	0.0763454	-4.40248	1.0702e-05	2.32337e-05
YPR057W	YPR057W	YPR057W	CDS	BRR1	700.971	805.308	-0.199208	0.0740979	-2.68845	0.00717846	0.0117935
YLL032C	YLL032C	YLL032C	CDS	YLL032C	1885.6	1404.3	0.423408	0.0661918	6.39669	1.58784e-10	4.7049e-10
YDR116C	YDR116C	YDR116C	CDS	MRPL1	1783.25	2960.2	-0.730084	0.0575611	-12.6836	7.28794e-37	5.7513e-36
YPL119C-A	YPL119C-A	YPL119C-A	CDS	YPL119C-A	496.58	503.666	-0.0179609	0.0846842	-0.212093	0.832035	0.87514
YHR130C	YHR130C	YHR130C	CDS	YHR130C	165.501	90.5543	0.871035	0.163522	5.32673	9.99989e-08	2.52492e-07
snR55	snR55	snR55	noncoding_exon	SNR55	80.3043	20.5071	1.99239	0.378453	5.26457	1.40521e-07	3.51127e-07
YDR122W	YDR122W	YDR122W	CDS	KIN1	4354.04	3743.62	0.21673	0.0422968	5.12403	2.99077e-07	7.30588e-07
YOL062C	YOL062C	YOL062C	CDS	APM4	2193.38	2652.04	-0.273625	0.0584332	-4.6827	2.83126e-06	6.43879e-06
YNL234W	YNL234W	YNL234W	CDS	YNL234W	1692.4	902.651	0.905901	0.0581433	15.5805	9.87801e-55	1.22973e-53
snR56	snR56	snR56	noncoding_exon	SNR56	55.0248	27.5011	1.00698	0.330617	3.04576	0.00232092	0.00405436
YJL194W	YJL194W	YJL194W	CDS	CDC6	312.608	343.82	-0.137832	0.124871	-1.10379	0.269685	0.341457
YOL015W	YOL015W	YOL015W	CDS	IRC10	473.274	303.559	0.637313	0.111832	5.69881	1.20643e-08	3.22702e-08
YDL070W	YDL070W	YDL070W	CDS	BDF2	9006.14	5302.53	0.764304	0.055947	13.6612	1.73055e-42	1.57167e-41
YOR241W	YOR241W	YOR241W	CDS	MET7	926.135	1087.13	-0.230481	0.063476	-3.631	0.000282322	0.00054483
YLR056W	YLR056W	YLR056W	CDS	ERG3	5131.65	6252.95	-0.284531	0.0518958	-5.48274	4.18787e-08	1.08447e-07
YPR039W	YPR039W	YPR039W	CDS	YPR039W	28.3219	33.4789	-0.253686	0.502146	-0.505203	0.613416	0.691764
YMR054W	YMR054W	YMR054W	CDS	STV1	3232.23	2582.23	0.324619	0.0483672	6.71156	1.92551e-11	6.03038e-11
YNL165W	YNL165W	YNL165W	CDS	YNL165W	1091.95	1114.07	-0.0296477	0.0717591	-0.413155	0.679493	0.748396
YKL110C	YKL110C	YKL110C	CDS	KTI12	869.874	1452.29	-0.738326	0.0724854	-10.1859	2.29326e-24	1.27213e-23
snR57	snR57	snR57	noncoding_exon	SNR57	215.037	61.62	1.79756	0.18513	9.70975	2.74007e-22	1.40504e-21
YBR280C	YBR280C	YBR280C	CDS	SAF1	3404.74	2968.37	0.198517	0.0496202	4.00073	6.3147e-05	0.000128689
YLR204W	YLR204W	YLR204W	CDS	QRI5	2915.37	2618.16	0.155264	0.0499951	3.10558	0.00189908	0.00335862
YML097C	YML097C	YML097C	CDS	VPS9	945.594	998.084	-0.0775979	0.0693243	-1.11935	0.262992	0.334317
YKR007W	YKR007W	YKR007W	CDS	MEH1	1165.88	1602.58	-0.461157	0.065664	-7.02298	2.17182e-12	7.19885e-12
snR61	snR61	snR61	noncoding_exon	SNR61	105.792	28.4062	1.89117	0.280177	6.74992	1.4793e-11	4.66432e-11
YHR193C	YHR193C	YHR193C	CDS	EGD2	9630.73	13121.9	-0.445844	0.0445647	-10.0044	1.45751e-23	7.84832e-23
YBL099W	YBL099W	YBL099W	CDS	ATP1	61828.5	117906	-0.931251	0.0377754	-24.6523	3.47524e-134	1.44471e-132
YNL305C	YNL305C	YNL305C	CDS	BXI1	11942.4	9432.79	0.340578	0.0563273	6.04641	1.48107e-09	4.15079e-09
YMR023C	YMR023C	YMR023C	CDS	MSS1	1037.41	828.122	0.324472	0.0772622	4.19962	2.67366e-05	5.61252e-05
YOR119C	YOR119C	YOR119C	CDS	RIO1	2769.58	2162.42	0.356855	0.0658309	5.42079	5.93366e-08	1.52636e-07
snR64	snR64	snR64	noncoding_exon	SNR64	19.4298	9.62404	1.01829	0.550378	1.85016	0.0642906	0.092483
YNL187W	YNL187W	YNL187W	CDS	SWT21	623.862	550.466	0.182121	0.0882194	2.06441	0.0389786	0.0578466
snR65	snR65	snR65	noncoding_exon	SNR65	11.4568	2.40447	2.26095	0.834017	2.71092	0.0067097	0.0110755
YMR101C	YMR101C	YMR101C	CDS	SRT1	436.386	272.349	0.679236	0.13843	4.90672	9.26105e-07	2.17482e-06
YBL062W	YBL062W	YBL062W	CDS	YBL062W	31.6567	16.5491	0.940324	0.521749	1.80225	0.0715056	0.101938
YCR061W	YCR061W	YCR061W	CDS	YCR061W	2816.56	2949.99	-0.0677918	0.0617364	-1.09808	0.272168	0.344226
YOR199W	YOR199W	YOR199W	CDS	YOR199W	3.49522	3.48589	0.00844507	4.12931	0.00204515	0.998368	1
YPR115W	YPR115W	YPR115W	CDS	RGC1	6085.56	6566.29	-0.109332	0.0423147	-2.58377	0.00977261	0.0158064
YHR088W	YHR088W	YHR088W	CDS	RPF1	1314.1	2056.86	-0.645302	0.0689349	-9.36103	7.89604e-21	3.84829e-20
YBR017C	YBR017C	YBR017C	CDS	KAP104	2698.36	2655.75	0.0240366	0.0474491	0.506577	0.612452	0.6909
YPR162C	YPR162C	YPR162C	CDS	ORC4	887.488	1043.56	-0.232826	0.0742602	-3.13527	0.00171695	0.00305041
snR7-L	snR7-L	snR7-L	noncoding_exon	SNR7-L	519.883	16.3702	4.98956	1.18735	4.20226	2.64259e-05	5.55229e-05
YDL161W	YDL161W	YDL161W	CDS	ENT1	2601.29	3558.4	-0.452104	0.0507195	-8.9138	4.93117e-19	2.22476e-18
YKL050C	YKL050C	YKL050C	CDS	YKL050C	808.689	1033.77	-0.35648	0.0753759	-4.72937	2.25222e-06	5.17587e-06
snR71	snR71	snR71	noncoding_exon	SNR71	25.4036	10.869	1.22108	0.47032	2.59628	0.00942397	0.0152672
tS%28AGA%29D3	tS%28AGA%29D3	tS%28AGA%29D3	noncoding_exon	tS%28AGA%29D3	0.36718	0.306789	-0.0507923	2.52125	-0.0201457	0.983927	0.990949
snR75	snR75	snR75	noncoding_exon	SNR75	22.1519	6.60788	1.71711	0.597216	2.87519	0.00403778	0.00685628
YJR055W	YJR055W	YJR055W	CDS	HIT1	294.65	423.747	-0.525468	0.119964	-4.38022	1.18558e-05	2.56387e-05
YGL099W	YGL099W	YGL099W	CDS	LSG1	1374.02	1651.27	-0.264142	0.0616997	-4.28109	1.85982e-05	3.95283e-05
snR76	snR76	snR76	noncoding_exon	SNR76	96.2006	28.3551	1.76063	0.32782	5.37073	7.84172e-08	1.99441e-07
YIL119C	YIL119C	YIL119C	CDS	RPI1	1762.74	2571.38	-0.546404	0.0554241	-9.85859	6.29269e-23	3.27971e-22
YPL193W	YPL193W	YPL193W	CDS	RSA1	1492.21	1793.75	-0.26577	0.0564046	-4.71185	2.45474e-06	5.61543e-06
snR77	snR77	snR77	noncoding_exon	SNR77	36.7525	15.7518	1.21175	0.399761	3.03119	0.0024359	0.00424142
YGL217C	YGL217C	YGL217C	CDS	YGL217C	4.38525	3.91444	0.164449	1.01828	0.161497	0.871702	0.905678
snR79	snR79	snR79	noncoding_exon	SNR79	37.7576	18.1741	1.05096	0.393214	2.67274	0.00752341	0.0123342
YBR012W-B	YBR012W-B	YBR012W-B	CDS	YBR012W-B	464.251	685.294	-0.562183	0.277793	-2.02375	0.0429959	0.0633643
YBR012W-A	YBR012W-A	YBR012W-A	CDS	YBR012W-A	99.7209	192.889	-0.951938	0.909114	-1.0471	0.295051	0.369887
YJR139C	YJR139C	YJR139C	CDS	HOM6	4940.17	7237.65	-0.550751	0.0389124	-14.1536	1.77351e-45	1.76442e-44
YBR133C	YBR133C	YBR133C	CDS	HSL7	2294.76	1932.74	0.24746	0.0588747	4.20316	2.63215e-05	5.53203e-05
YBR162C	YBR162C	YBR162C	CDS	TOS1	23688	23244	0.0273827	0.0340948	0.803133	0.421898	0.506277
YFL002W-B	YFL002W-B	YFL002W-B	CDS	YFL002W-B	2.05126	1.83884	0.17651	1.47714	0.119494	0.904884	0.932661
snR81	snR81	snR81	noncoding_exon	SNR81	106.814	47.726	1.17175	0.292717	4.003	6.25437e-05	0.000127497
YGL019W	YGL019W	YGL019W	CDS	CKB1	2978.05	3602.34	-0.274541	0.040389	-6.79742	1.06507e-11	3.38265e-11
YGR201C	YGR201C	YGR201C	CDS	YGR201C	4992.49	7604.72	-0.606507	0.0514781	-11.7819	4.84145e-32	3.33788e-31
YNL172W	YNL172W	YNL172W	CDS	APC1	1840.11	1417.47	0.37558	0.0576158	6.51869	7.09227e-11	2.15358e-10
YNL058C	YNL058C	YNL058C	CDS	YNL058C	4212.56	4272.58	-0.0201163	0.0569931	-0.352961	0.724118	0.786874
YPL160W	YPL160W	YPL160W	CDS	CDC60	3141.01	3205.72	-0.0296355	0.0495882	-0.597633	0.550085	0.634169
YOL083C-A	YOL083C-A	YOL083C-A	CDS	YOL083C-A	7.78967	6.31703	0.304634	0.62358	0.488525	0.625178	0.702082
YNL023C	YNL023C	YNL023C	CDS	FAP1	1562.62	1320.62	0.242585	0.0624144	3.88669	0.000101621	0.000203942
YDR214W	YDR214W	YDR214W	CDS	AHA1	6269	5466.01	0.197941	0.0349573	5.66236	1.49307e-08	3.95734e-08
YLR222C	YLR222C	YLR222C	CDS	UTP13	1729.58	1483.39	0.22019	0.0652623	3.37392	0.000741059	0.00136886
YLR295C	YLR295C	YLR295C	CDS	ATP14	14992.4	18760.2	-0.323295	0.040051	-8.07207	6.91164e-16	2.7318e-15
YER175W-A	YER175W-A	YER175W-A	CDS	YER175W-A	36.7844	62.1426	-0.758494	0.246616	-3.0756	0.00210077	0.00369472
YHR168W	YHR168W	YHR168W	CDS	MTG2	826.034	719.561	0.196888	0.096284	2.04486	0.0408684	0.0604585
YOR064C	YOR064C	YOR064C	CDS	YNG1	2267.29	2717.4	-0.262664	0.052828	-4.97207	6.62426e-07	1.57628e-06
YOR159C	YOR159C	YOR159C	CDS	SME1	526.641	546.627	-0.0522237	0.088189	-0.59218	0.55373	0.63774
YOL081W	YOL081W	YOL081W	CDS	IRA2	13453.8	10638	0.338718	0.0354187	9.56325	1.14113e-21	5.7253e-21
YOL036W	YOL036W	YOL036W	CDS	YOL036W	5751.73	5001.95	0.201805	0.0464963	4.34025	1.42323e-05	3.05653e-05
YGL148W	YGL148W	YGL148W	CDS	ARO2	3783.11	4603.6	-0.282392	0.0454504	-6.21319	5.19188e-10	1.49341e-09
YPR204C-A	YPR204C-A	YPR204C-A	CDS	YPR204C-A	0	0
YBR282W	YBR282W	YBR282W	CDS	MRPL27	964.747	1601.6	-0.730762	0.0698026	-10.469	1.19936e-25	6.9169e-25
snR85	snR85	snR85	noncoding_exon	SNR85	60.5722	27.8879	1.11527	0.311876	3.57599	0.000348907	0.000668157
tL%28CAA%29G3	tL%28CAA%29G3	tL%28CAA%29G3	noncoding_exon	tL%28CAA%29G3	0	0
tL%28CAA%29G1	tL%28CAA%29G1	tL%28CAA%29G1	noncoding_exon	tL%28CAA%29G1	0	0
YDR194C	YDR194C	YDR194C	CDS	MSS116	2033.18	2861.65	-0.493519	0.0613239	-8.04774	8.4337e-16	3.32023e-15
YOL114C	YOL114C	YOL114C	CDS	YOL114C	367.94	277.98	0.401095	0.115954	3.45907	0.000542038	0.00101736
YGR084C	YGR084C	YGR084C	CDS	MRP13	1426.97	2356.54	-0.723997	0.0625068	-11.5827	5.04387e-31	3.3613e-30
YNR030W	YNR030W	YNR030W	CDS	ALG12	937.92	1300.72	-0.470523	0.0615395	-7.64587	2.0754e-14	7.6408e-14
tA%28AGC%29D	tA%28AGC%29D	tA%28AGC%29D	noncoding_exon	tA%28AGC%29D	0	0.679352	-1.9005	4.36879	-0.435018	0.663549	0.735709
YAL037C-B	YAL037C-B	YAL037C-B	CDS	YAL037C-B	67.2641	97.7713	-0.539611	0.320091	-1.68581	0.0918329	0.128762
YKL076C	YKL076C	YKL076C	CDS	PSY1	121.438	118.095	0.0410528	0.183754	0.223412	0.823215	0.867708
YDR466W	YDR466W	YDR466W	CDS	PKH3	2465.21	2728.59	-0.146803	0.0496186	-2.95863	0.0030901	0.00531166
YNL331C	YNL331C	YNL331C	CDS	AAD14	829.726	772.884	0.0987801	0.0729774	1.35357	0.175873	0.233118
YFR045W	YFR045W	YFR045W	CDS	YFR045W	1420.74	1822.63	-0.359179	0.0554589	-6.47649	9.38824e-11	2.81889e-10
YIL002C	YIL002C	YIL002C	CDS	INP51	1585.82	1597.91	-0.0116633	0.0585632	-0.199158	0.842139	0.881853
YGR159C	YGR159C	YGR159C	CDS	NSR1	2081.69	3373.62	-0.69587	0.0637208	-10.9206	9.18844e-28	5.63902e-27
YGL089C	YGL089C	YGL089C	CDS	MF%28ALPHA%292	16.1137	23.527	-0.541243	0.5024	-1.07731	0.28134	0.354543
tA%28AGC%29H	tA%28AGC%29H	tA%28AGC%29H	noncoding_exon	tA%28AGC%29H	0.993644	0	2.39651	3.23267	0.74134	0.458487	0.542909
YNL118C	YNL118C	YNL118C	CDS	DCP2	3741.98	4091.95	-0.128641	0.0420432	-3.05973	0.00221534	0.0038845
YGL228W	YGL228W	YGL228W	CDS	SHE10	6028.09	7152.35	-0.246911	0.0534673	-4.61798	3.87493e-06	8.74394e-06
YJR117W	YJR117W	YJR117W	CDS	STE24	6798.58	4500.05	0.595296	0.0423955	14.0415	8.68666e-45	8.44953e-44
YBR196C-A	YBR196C-A	YBR196C-A	CDS	YBR196C-A	18.3803	14.2836	0.363152	0.504867	0.719302	0.471955	0.556591
YBR196C-B	YBR196C-B	YBR196C-B	CDS	YBR196C-B	15.1277	11.9689	0.351245	0.504551	0.696152	0.486333	0.570657
YIL030W-A	YIL030W-A	YIL030W-A	CDS	YIL030W-A	23.859	28.818	-0.265694	0.368389	-0.721233	0.470766	0.555846
YLR357W	YLR357W	YLR357W	CDS	RSC2	4087.98	2424.48	0.753405	0.0416948	18.0695	5.53783e-73	9.36471e-72
YER127W	YER127W	YER127W	CDS	LCP5	526.233	598.959	-0.187834	0.103727	-1.81085	0.0701644	0.100108
YJR093C	YJR093C	YJR093C	CDS	FIP1	1939.98	2042.63	-0.0751218	0.0679193	-1.10604	0.268707	0.340343
YLR017W	YLR017W	YLR017W	CDS	MEU1	3619.61	2387.83	0.600043	0.0457393	13.1188	2.57065e-39	2.18411e-38
YHR110W	YHR110W	YHR110W	CDS	ERP5	2521.06	2618.26	-0.0555922	0.050201	-1.10739	0.268125	0.339729
YBR041W	YBR041W	YBR041W	CDS	FAT1	1758.23	1389.52	0.341511	0.0548488	6.2264	4.77288e-10	1.37686e-09
YNL212W	YNL212W	YNL212W	CDS	VID27	3011.03	3557.65	-0.240563	0.051068	-4.71064	2.4694e-06	5.64355e-06
tA%28AGC%29J	tA%28AGC%29J	tA%28AGC%29J	noncoding_exon	tA%28AGC%29J	0	1.40051	-2.93913	2.9742	-0.988209	0.32305	0.40069
tA%28AGC%29K1	tA%28AGC%29K1	tA%28AGC%29K1	noncoding_exon	tA%28AGC%29K1	0	0.372564	-1.01256	4.40736	-0.229743	0.818291	0.864202
YKL202W	YKL202W	YKL202W	CDS	YKL202W	537.48	278.515	0.947638	0.485706	1.95105	0.0510506	0.0745427
YGR122C-A	YGR122C-A	YGR122C-A	CDS	YGR122C-A	89.886	79.9515	0.162478	0.210717	0.771072	0.440664	0.525726
YOR264W	YOR264W	YOR264W	CDS	DSE3	2927.21	2124.34	0.462584	0.0461828	10.0164	1.29142e-23	6.98084e-23
YNL042W-B	YNL042W-B	YNL042W-B	CDS	YNL042W-B	7.31503	7.9106	-0.135919	0.754001	-0.180264	0.856945	0.893136
YBL029C-A	YBL029C-A	YBL029C-A	CDS	YBL029C-A	2935.13	3206.84	-0.126495	0.0655	-1.93122	0.0534559	0.0778108
YGR184C	YGR184C	YGR184C	CDS	UBR1	5152.84	5039.64	0.0314557	0.0436423	0.720762	0.471056	0.556095
YOR366W	YOR366W	YOR366W	CDS	YOR366W	132.6	93.0381	0.506065	0.177362	2.85329	0.00432693	0.00732411
YNL275W	YNL275W	YNL275W	CDS	BOR1	750.507	545.494	0.46205	0.0875652	5.27663	1.31578e-07	3.29962e-07
YAR015W	YAR015W	YAR015W	CDS	ADE1	5718.99	4638.89	0.301829	0.0396317	7.61586	2.61946e-14	9.60332e-14
YPR046W	YPR046W	YPR046W	CDS	MCM16	134.968	169.768	-0.332574	0.164642	-2.01999	0.0433847	0.0638834
tA%28AGC%29M2	tA%28AGC%29M2	tA%28AGC%29M2	noncoding_exon	tA%28AGC%29M2	1.65209	0	3.13029	2.68762	1.16471	0.244136	0.312968
YDR427W	YDR427W	YDR427W	CDS	RPN9	3407.08	4029.93	-0.242928	0.0449609	-5.40309	6.55041e-08	1.6776e-07
YLR079W	YLR079W	YLR079W	CDS	SIC1	6433.59	3996	0.687162	0.0393659	17.4558	3.11239e-68	4.81972e-67
YLR408C	YLR408C	YLR408C	CDS	BLS1	497.307	359.474	0.467848	0.115159	4.06262	4.85243e-05	9.99391e-05
YMR093W	YMR093W	YMR093W	CDS	UTP15	984.562	774.189	0.347036	0.0910079	3.81324	0.000137154	0.000272281
YBR221W-A	YBR221W-A	YBR221W-A	CDS	YBR221W-A	3.61934	2.32087	0.620685	1.00603	0.616965	0.537258	0.622004
YDR079W	YDR079W	YDR079W	CDS	PET100	1601.17	2311.06	-0.529632	0.0784533	-6.75093	1.46902e-11	4.63399e-11
YMR268C	YMR268C	YMR268C	CDS	PRP24	998.3	1121.78	-0.168674	0.0819522	-2.05819	0.0395715	0.0586892
YOR169C	YOR169C	YOR169C	CDS	YOR169C	37.0496	39.3364	-0.0673441	0.499648	-0.134783	0.892783	0.923049
YML070W	YML070W	YML070W	CDS	DAK1	4912.37	5706.69	-0.216382	0.0534731	-4.04655	5.19784e-05	0.000106896
YHR175W-A	YHR175W-A	YHR175W-A	CDS	YHR175W-A	210.862	195.361	0.1087	0.151005	0.719841	0.471623	0.556387
YPR072W	YPR072W	YPR072W	CDS	NOT5	2685.73	2884.65	-0.10438	0.0532542	-1.96004	0.0499912	0.073118
YMR108W	YMR108W	YMR108W	CDS	ILV2	13138.8	14519.5	-0.144034	0.0451286	-3.19164	0.00141465	0.00253657
YCR091W	YCR091W	YCR091W	CDS	KIN82	4200.3	3386.63	0.31095	0.0451364	6.88912	5.61381e-12	1.81178e-11
YER062C	YER062C	YER062C	CDS	GPP2	1142.23	1324.9	-0.212231	0.0669689	-3.1691	0.00152913	0.00272993
YDR244W	YDR244W	YDR244W	CDS	PEX5	2228.15	2023.34	0.140172	0.053734	2.60862	0.00909073	0.0147582
tA%28UGC%29E	tA%28UGC%29E	tA%28UGC%29E	noncoding_exon	tA%28UGC%29E	0.582537	1.44231	-1.21816	2.20197	-0.553213	0.580117	0.662558
YJL009W	YJL009W	YJL009W	CDS	YJL009W	0.658449	0.348589	0.839908	2.45806	0.341696	0.73258	0.794956
YDL137W	YDL137W	YDL137W	CDS	ARF2	8138.01	10073.9	-0.307609	0.0357059	-8.61507	6.98984e-18	3.01899e-17
YGR271W	YGR271W	YGR271W	CDS	SLH1	1969.44	2202.46	-0.160826	0.0518783	-3.10006	0.00193481	0.00341835
YDR233C	YDR233C	YDR233C	CDS	RTN1	8625.85	12227.6	-0.503343	0.0434306	-11.5896	4.65388e-31	3.10733e-30
YGR071C	YGR071C	YGR071C	CDS	ENV11	747.684	887.282	-0.250745	0.089875	-2.78994	0.00527183	0.00883573
YCR106W	YCR106W	YCR106W	CDS	RDS1	324.716	334.27	-0.0443891	0.145391	-0.305309	0.760131	0.817202
YBL100C	YBL100C	YBL100C	CDS	YBL100C	9.90873	12.947	-0.391949	0.691155	-0.567093	0.570651	0.653992
YDR489W	YDR489W	YDR489W	CDS	SLD5	406.491	410.95	-0.0165022	0.123139	-0.134013	0.893392	0.923542
YPL282C	YPL282C	YPL282C	CDS	PAU22	0	0
YPR049C	YPR049C	YPR049C	CDS	ATG11	2348.6	2160.67	0.118984	0.0534839	2.22467	0.0261032	0.039666
YDL057W	YDL057W	YDL057W	CDS	YDL057W	1477.76	1420.77	0.0558954	0.051787	1.07933	0.28044	0.353536
tA%28UGC%29Q	tA%28UGC%29Q	tA%28UGC%29Q	noncoding_exon	tA%28UGC%29Q	1.32884	3.34881	-1.34668	1.3821	-0.974376	0.32987	0.40761
YGR257C	YGR257C	YGR257C	CDS	MTM1	1856.32	1833.57	0.0184949	0.0567824	0.325716	0.744639	0.804667
tC%28GCA%29B	tC%28GCA%29B	tC%28GCA%29B	noncoding_exon	tC%28GCA%29B	0.734361	0	1.94599	4.35726	0.446607	0.655159	0.728835
YPL235W	YPL235W	YPL235W	CDS	RVB2	1982.59	2582.63	-0.382697	0.0557744	-6.8615	6.8139e-12	2.18897e-11
YLR122C	YLR122C	YLR122C	CDS	YLR122C	312.041	170.162	0.869305	0.152172	5.71264	1.11234e-08	2.98448e-08
tC%28GCA%29G	tC%28GCA%29G	tC%28GCA%29G	noncoding_exon	tC%28GCA%29G	0	0.372564	-1.01256	3.1742	-0.318998	0.749728	0.809039
YBL087C	YBL087C	YBL087C	CDS	RPL23A	4539.51	3688.98	0.299936	0.0556288	5.39174	6.97789e-08	1.78315e-07
YJL132W	YJL132W	YJL132W	CDS	YJL132W	1239.85	1032.46	0.263672	0.0653464	4.035	5.46033e-05	0.000112096
YGL190C	YGL190C	YGL190C	CDS	CDC55	2868.03	2998.63	-0.0648911	0.0525843	-1.23404	0.217188	0.281784
YBR110W	YBR110W	YBR110W	CDS	ALG1	1762.91	2391.47	-0.439898	0.0528693	-8.32048	8.76076e-17	3.61614e-16
YDR144C	YDR144C	YDR144C	CDS	MKC7	602.994	476.22	0.340743	0.112834	3.01987	0.00252885	0.00439668
YFL046W	YFL046W	YFL046W	CDS	FMP32	1082.69	1361.86	-0.332165	0.0721957	-4.60089	4.20682e-06	9.45926e-06
YOR103C	YOR103C	YOR103C	CDS	OST2	1174.68	1578.53	-0.427926	0.0768356	-5.56938	2.55654e-08	6.67721e-08
YKL137W	YKL137W	YKL137W	CDS	CMC1	945.892	1409.96	-0.57478	0.0683666	-8.40733	4.19455e-17	1.75733e-16
YDR447C	YDR447C	YDR447C	CDS	RPS17B	4799.23	3613.96	0.409673	0.0442257	9.26323	1.98344e-20	9.52707e-20
YGL009C	YGL009C	YGL009C	CDS	LEU1	5343.39	8302.78	-0.635551	0.0389232	-16.3283	6.20447e-60	8.51317e-59
YNL324W	YNL324W	YNL324W	CDS	YNL324W	5.69064	7.30506	-0.386385	0.736433	-0.524671	0.599812	0.679715
YPR145W	YPR145W	YPR145W	CDS	ASN1	6903.6	6230.2	0.148187	0.0360573	4.10977	3.96052e-05	8.21022e-05
YJL063C	YJL063C	YJL063C	CDS	MRPL8	2362.51	2948.57	-0.318659	0.0488835	-6.51876	7.08921e-11	2.15358e-10
YMR149W	YMR149W	YMR149W	CDS	SWP1	3584.06	3507.82	0.0308708	0.0556194	0.555037	0.578869	0.661349
tC%28GCA%29Q	tC%28GCA%29Q	tC%28GCA%29Q	noncoding_exon	tC%28GCA%29Q	1.77193	10.0685	-2.56429	1.01863	-2.5174	0.0118224	0.0189505
YIR010W	YIR010W	YIR010W	CDS	DSN1	1379.92	1584.02	-0.200236	0.0610328	-3.28079	0.00103519	0.00188766
YDR331W	YDR331W	YDR331W	CDS	GPI8	900.438	905.393	-0.010492	0.0683042	-0.153607	0.87792	0.910242
tD%28GUC%29B	tD%28GUC%29B	tD%28GUC%29B	noncoding_exon	tD%28GUC%29B	0.291269	1.33473	-1.91796	2.64414	-0.725362	0.46823	0.553133
YKR044W	YKR044W	YKR044W	CDS	UIP5	1225.11	1191.8	0.0412817	0.0720747	0.572763	0.566805	0.650545
YLR433C	YLR433C	YLR433C	CDS	CNA1	2496.38	1997.66	0.321404	0.0613895	5.23548	1.64553e-07	4.09273e-07
YMR068W	YMR068W	YMR068W	CDS	AVO2	2071.26	1353.58	0.61371	0.0625136	9.81721	9.49331e-23	4.92214e-22
tD%28GUC%29D	tD%28GUC%29D	tD%28GUC%29D	noncoding_exon	tD%28GUC%29D	0	1.35256	-2.89692	2.42555	-1.19434	0.232347	0.299448
YLR157C-C	YLR157C-C	YLR157C-C	CDS	YLR157C-C	0	0
tD%28GUC%29G1	tD%28GUC%29G1	tD%28GUC%29G1	noncoding_exon	tD%28GUC%29G1	1.03757	0	2.45226	3.37498	0.7266	0.467471	0.552516
YFL068W	YFL068W	YFL068W	CDS	YFL068W	0	0
YER032W	YER032W	YER032W	CDS	FIR1	881.371	1436.58	-0.703625	0.0663318	-10.6077	2.74538e-26	1.61804e-25
YJR070C	YJR070C	YJR070C	CDS	LIA1	2106.28	2463.77	-0.225817	0.0532914	-4.2374	2.26121e-05	4.76821e-05
tP%28UGG%29H	tP%28UGG%29H	tP%28UGG%29H	noncoding_exon	SUF8	0	0	0	3.93045	0	1	1
YGL005C	YGL005C	YGL005C	CDS	COG7	3020.2	4431.67	-0.553553	0.0600441	-9.21911	2.99563e-20	1.42809e-19
tP%28UGG%29L	tP%28UGG%29L	tP%28UGG%29L	noncoding_exon	tP%28UGG%29L	0	0
tP%28UGG%29M	tP%28UGG%29M	tP%28UGG%29M	noncoding_exon	SUF7	0	0
YHR043C	YHR043C	YHR043C	CDS	DOG2	2727.9	2616.41	0.0610151	0.0494934	1.23279	0.217653	0.282177
YDL111C	YDL111C	YDL111C	CDS	RRP42	1003.83	1076.49	-0.101771	0.0625596	-1.62679	0.103782	0.143983
tD%28GUC%29G2	tD%28GUC%29G2	tD%28GUC%29G2	noncoding_exon	tD%28GUC%29G2	2.27856	8.30713	-1.85499	0.975713	-1.90116	0.0572811	0.0830327
YPL007C	YPL007C	YPL007C	CDS	TFC8	594.688	903.544	-0.603805	0.0854011	-7.07023	1.54677e-12	5.17863e-12
tD%28GUC%29J1	tD%28GUC%29J1	tD%28GUC%29J1	noncoding_exon	tD%28GUC%29J1	0.582537	0	1.67307	3.01057	0.555733	0.578394	0.660921
YMR094W	YMR094W	YMR094W	CDS	CTF13	260.222	373.924	-0.527925	0.12149	-4.34543	1.39002e-05	2.98797e-05
YKL159C	YKL159C	YKL159C	CDS	RCN1	1302.82	1091.7	0.254883	0.0770375	3.30856	0.000937772	0.00171765
YDR507C	YDR507C	YDR507C	CDS	GIN4	1499.06	1874.11	-0.322512	0.061172	-5.27221	1.34788e-07	3.37526e-07
tP%28UGG%29Q	tP%28UGG%29Q	tP%28UGG%29Q	noncoding_exon	tP%28UGG%29Q	4.27779	3.67958	0.207297	0.967269	0.214311	0.830304	0.873583
YKR075W-A	YKR075W-A	YKR075W-A	CDS	YKR075W-A	9.07458	7.89277	0.194202	0.669101	0.290243	0.771631	0.826925
tD%28GUC%29J2	tD%28GUC%29J2	tD%28GUC%29J2	noncoding_exon	tD%28GUC%29J2	0.335195	0.962167	-1.46193	2.58811	-0.564863	0.572167	0.655514
YJL158C	YJL158C	YJL158C	CDS	CIS3	16652.7	17441.4	-0.0665912	0.0577602	-1.15289	0.248956	0.318269
YLR396C	YLR396C	YLR396C	CDS	VPS33	1477.71	768.319	0.941905	0.0770035	12.232	2.09786e-34	1.567e-33
YBR245C	YBR245C	YBR245C	CDS	ISW1	1476.56	1909.95	-0.371653	0.0665795	-5.5821	2.37638e-08	6.22064e-08
YJL216C	YJL216C	YJL216C	CDS	IMA5	350.201	216.692	0.690959	0.123035	5.61596	1.95477e-08	5.14205e-08
YBR210W	YBR210W	YBR210W	CDS	ERV15	893.69	1187.2	-0.407149	0.0846025	-4.8125	1.49055e-06	3.46078e-06
YPL103C	YPL103C	YPL103C	CDS	FMP30	638.114	847.369	-0.41177	0.0781785	-5.26705	1.38635e-07	3.46539e-07
YIL103W	YIL103W	YIL103W	CDS	DPH1	657.652	868.958	-0.401997	0.0818609	-4.91074	9.07354e-07	2.13405e-06
YIL152W	YIL152W	YIL152W	CDS	YIL152W	3468.76	2036.57	0.769469	0.0541066	14.2213	6.7539e-46	6.82623e-45
tD%28GUC%29J3	tD%28GUC%29J3	tD%28GUC%29J3	noncoding_exon	tD%28GUC%29J3	0	1.37653	-2.91705	2.6255	-1.11105	0.266549	0.338161
YJR096W	YJR096W	YJR096W	CDS	YJR096W	7736.42	7350.1	0.07376	0.040525	1.82011	0.0687423	0.0982796
YGR143W	YGR143W	YGR143W	CDS	SKN1	2677.33	3300.6	-0.302662	0.0417778	-7.24457	4.33805e-13	1.49911e-12
YGR112W	YGR112W	YGR112W	CDS	SHY1	1274.19	2200.58	-0.788597	0.0585399	-13.4711	2.31444e-41	2.03578e-40
YLR256W	YLR256W	YLR256W	CDS	HAP1	7833.47	4860.51	0.688654	0.047707	14.4351	3.1127e-47	3.26904e-46
YHR174W	YHR174W	YHR174W	CDS	ENO2	24580.4	23425.4	0.0695247	0.0626855	1.1091	0.267385	0.339007
tD%28GUC%29K	tD%28GUC%29K	tD%28GUC%29K	noncoding_exon	tD%28GUC%29K	0	1.05192	-2.52793	4.32626	-0.584323	0.559003	0.642741
YKL140W	YKL140W	YKL140W	CDS	TGL1	1868.92	2116.05	-0.179078	0.0582598	-3.07379	0.00211358	0.00371445
YDL213C	YDL213C	YDL213C	CDS	NOP6	2567.77	2865.92	-0.157599	0.0583956	-2.69882	0.0069585	0.0114591
YDR317W	YDR317W	YDR317W	CDS	HIM1	104.354	57.895	0.847867	0.277211	3.05857	0.002224	0.00389674
YDR478W	YDR478W	YDR478W	CDS	SNM1	389.633	431.15	-0.14761	0.108136	-1.36505	0.172237	0.228776
YKL097C	YKL097C	YKL097C	CDS	YKL097C	15.1401	14.9808	0.013249	0.456374	0.0290311	0.97684	0.987269
tD%28GUC%29N	tD%28GUC%29N	tD%28GUC%29N	noncoding_exon	tD%28GUC%29N	10.5748	24.7425	-1.22654	0.444755	-2.75778	0.00581956	0.00969788
YNL106C	YNL106C	YNL106C	CDS	INP52	1147.23	885.065	0.372116	0.065874	5.64891	1.61466e-08	4.26342e-08
YOR378W	YOR378W	YOR378W	CDS	AMF1	146.015	93.1523	0.647387	0.200224	3.23331	0.00122363	0.00220822
YFR015C	YFR015C	YFR015C	CDS	GSY1	11146.9	6217.99	0.842504	0.0431657	19.5179	7.73263e-85	1.61208e-83
YMR230W	YMR230W	YMR230W	CDS	RPS10B	7922.21	5182.66	0.612061	0.049303	12.4143	2.18625e-35	1.6669e-34
YIL092W	YIL092W	YIL092W	CDS	YIL092W	834.742	781.473	0.0943921	0.0693761	1.36059	0.173645	0.230514
YAR009C	YAR009C	YAR009C	CDS	YAR009C	746.424	624.945	0.255304	0.163348	1.56294	0.118066	0.162318
YLR453C	YLR453C	YLR453C	CDS	RIF2	499.523	399.042	0.321485	0.0916898	3.50622	0.000454516	0.000859091
tD%28GUC%29Q	tD%28GUC%29Q	tD%28GUC%29Q	noncoding_exon	tD%28GUC%29Q	0	1.04577	-2.51983	3.51648	-0.716576	0.473636	0.558339
YGR052W	YGR052W	YGR052W	CDS	FMP48	1307.48	1345.42	-0.0407627	0.0755247	-0.539727	0.589385	0.66953
YJR161C	YJR161C	YJR161C	CDS	COS5	949.258	778.101	0.284305	0.0743954	3.82154	0.00013262	0.000263505
YOR278W	YOR278W	YOR278W	CDS	HEM4	954.538	1235.16	-0.372324	0.0755251	-4.92981	8.23102e-07	1.94208e-06
YNL085W	YNL085W	YNL085W	CDS	MKT1	2933.64	4082.96	-0.476864	0.0420491	-11.3407	8.25279e-30	5.36163e-29
YGL061C	YGL061C	YGL061C	CDS	DUO1	251.719	409.798	-0.704667	0.122636	-5.74602	9.13686e-09	2.46093e-08
YPL210C	YPL210C	YPL210C	CDS	SRP72	1514.68	2364.15	-0.640768	0.0566742	-11.3062	1.223e-29	7.90143e-29
YOR087W	YOR087W	YOR087W	CDS	YVC1	940.256	1109.43	-0.240007	0.0680203	-3.52846	0.00041799	0.000793487
YGL234W	YGL234W	YGL234W	CDS	ADE5%2C7	4219.13	4925.62	-0.223566	0.0636892	-3.51026	0.000447663	0.000847514
YOR347C	YOR347C	YOR347C	CDS	PYK2	2589.97	1763	0.556262	0.0597205	9.31443	1.22607e-20	5.91358e-20
YPR093C	YPR093C	YPR093C	CDS	ASR1	2645.19	1485.97	0.832401	0.0578149	14.3977	5.34954e-47	5.55144e-46
YAL029C	YAL029C	YAL029C	CDS	MYO4	5171.79	2830.93	0.86852	0.0462718	18.77	1.32939e-78	2.46273e-77
YOL155C	YOL155C	YOL155C	CDS	HPF1	3801.11	6562.92	-0.787687	0.0535336	-14.7139	5.25073e-49	5.77498e-48
YDR393W	YDR393W	YDR393W	CDS	SHE9	771.318	1178.65	-0.610795	0.0663341	-9.20786	3.32686e-20	1.58168e-19
YLR316C	YLR316C	YLR316C	CDS	TAD3	1234.26	675.877	0.867474	0.0727685	11.921	9.19944e-33	6.4767e-32
YGR186W	YGR186W	YGR186W	CDS	TFG1	6404.93	6445.73	-0.0095785	0.0428822	-0.223368	0.823249	0.867708
YDR294C	YDR294C	YDR294C	CDS	DPL1	5533.41	5873.66	-0.0857915	0.0431364	-1.98884	0.0467185	0.0685755
YHR135C	YHR135C	YHR135C	CDS	YCK1	4407.62	5043.84	-0.193996	0.0438956	-4.41948	9.89369e-06	2.15391e-05
YDR543C	YDR543C	YDR543C	CDS	YDR543C	1.39281	1.86282	-0.41516	1.97254	-0.210469	0.833301	0.875945
tG%28UCC%29Q	tG%28UCC%29Q	tG%28UCC%29Q	noncoding_exon	tG%28UCC%29Q	2.27856	3.98022	-0.810107	1.23018	-0.658527	0.510199	0.595047
YBR181C	YBR181C	YBR181C	CDS	RPS6B	4217.03	3298.92	0.353809	0.0590476	5.99194	2.07353e-09	5.78105e-09
tG%28UCC%29G	tG%28UCC%29G	tG%28UCC%29G	noncoding_exon	SUF4	1.58812	2.40447	-0.57987	1.62745	-0.356305	0.721612	0.78464
tG%28GCC%29O2	tG%28GCC%29O2	tG%28GCC%29O2	noncoding_exon	SUF17	1.728	2.47025	-0.525733	1.64095	-0.320384	0.748677	0.808155
tG%28GCC%29O1	tG%28GCC%29O1	tG%28GCC%29O1	noncoding_exon	tG%28GCC%29O1	0.291269	0	0.910968	4.40736	0.206693	0.83625	0.876801
YOR078W	YOR078W	YOR078W	CDS	BUD21	874.582	1239.61	-0.503809	0.0907861	-5.5494	2.86646e-08	7.46433e-08
tG%28UCC%29O	tG%28UCC%29O	tG%28UCC%29O	noncoding_exon	SUF1	1.36082	2.10383	-0.633655	1.89621	-0.334169	0.738252	0.799744
tG%28UCC%29N	tG%28UCC%29N	tG%28UCC%29N	noncoding_exon	SUF6	1.43674	2.01408	-0.530311	1.75399	-0.302345	0.762389	0.819223
YOR243C	YOR243C	YOR243C	CDS	PUS7	978.078	1311.31	-0.42305	0.0838932	-5.04272	4.58956e-07	1.10682e-06
YMR165C	YMR165C	YMR165C	CDS	PAH1	6003.49	3924.74	0.613386	0.039948	15.3546	3.2988e-53	3.93826e-52
YCR005C	YCR005C	YCR005C	CDS	CIT2	53425	37525.5	0.509568	0.0317056	16.0719	4.01768e-58	5.33451e-57
YGR296W	YGR296W	YGR296W	CDS	YRF1-3	77.7498	60.4924	0.368456	0.26495	1.39066	0.164327	0.219438
tE%28CUC%29D	tE%28CUC%29D	tE%28CUC%29D	noncoding_exon	tE%28CUC%29D	0.36718	1.06974	-1.5747	2.25801	-0.697385	0.485562	0.56998
YPR055W	YPR055W	YPR055W	CDS	SEC8	1435.69	1305.54	0.137247	0.0611471	2.24454	0.0247975	0.0378299
YHR037W	YHR037W	YHR037W	CDS	PUT2	4978.51	7061.07	-0.504102	0.046885	-10.7519	5.8069e-27	3.47816e-26
YLR032W	YLR032W	YLR032W	CDS	RAD5	2080.86	1171.56	0.82852	0.0700496	11.8276	2.81011e-32	1.95476e-31
YDR114C	YDR114C	YDR114C	CDS	YDR114C	19.5244	11.7796	0.724749	0.63732	1.13718	0.255462	0.325812
tE%28UUC%29C	tE%28UUC%29C	tE%28UUC%29C	noncoding_exon	tE%28UUC%29C	0	1.74295	-3.25715	2.96951	-1.09686	0.272701	0.344839
tE%28UUC%29E3	tE%28UUC%29E3	tE%28UUC%29E3	noncoding_exon	tE%28UUC%29E3	0	0.306789	-1.01256	4.40736	-0.229743	0.818291	0.864202
tE%28UUC%29G1	tE%28UUC%29G1	tE%28UUC%29G1	noncoding_exon	SOE1	10.6904	26.8303	-1.30997	0.541912	-2.41731	0.0156357	0.0246278
YBR099C	YBR099C	YBR099C	CDS	YBR099C	107.357	73.9558	0.540884	0.206413	2.62039	0.0087828	0.0143048
YEL020C	YEL020C	YEL020C	CDS	YEL020C	2088.98	1890.38	0.144876	0.0543288	2.66666	0.00766089	0.0125478
YOL060C	YOL060C	YOL060C	CDS	MAM3	4036.72	3864.58	0.0628114	0.0443771	1.4154	0.156951	0.210473
tE%28UUC%29G2	tE%28UUC%29G2	tE%28UUC%29G2	noncoding_exon	tE%28UUC%29G2	0.626464	0	1.74718	3.32446	0.525552	0.5992	0.679242
tE%28UUC%29L	tE%28UUC%29L	tE%28UUC%29L	noncoding_exon	tE%28UUC%29L	0	1.11769	-2.5939	2.70725	-0.958132	0.337996	0.415959
YNL232W	YNL232W	YNL232W	CDS	CSL4	1760.49	1990.14	-0.176041	0.0518208	-3.39711	0.000681026	0.0012643
YDL076C	YDL076C	YDL076C	CDS	RXT3	1100.24	964.453	0.189879	0.0671667	2.82698	0.00469899	0.0079117
tF%28GAA%29Q	tF%28GAA%29Q	tF%28GAA%29Q	noncoding_exon	tF%28GAA%29Q	1.87939	4.70137	-1.29687	1.18635	-1.09316	0.274324	0.346703
YDR120C	YDR120C	YDR120C	CDS	TRM1	1123.42	1735.71	-0.625817	0.0626032	-9.99657	1.57774e-23	8.48263e-23
tG%28CCC%29O	tG%28CCC%29O	tG%28CCC%29O	noncoding_exon	SUF5	1.28491	2.69344	-1.05949	1.58082	-0.670212	0.502722	0.587429
YJL192C	YJL192C	YJL192C	CDS	SOP4	1520.74	1998.04	-0.394607	0.0550386	-7.16964	7.51931e-13	2.5617e-12
YEL020C-B	YEL020C-B	YEL020C-B	CDS	YEL020C-B	7.23868	4.6774	0.619809	0.881418	0.703195	0.481934	0.566161
tG%28GCC%29B	tG%28GCC%29B	tG%28GCC%29B	noncoding_exon	tG%28GCC%29B	0	0.306789	-1.01256	4.40736	-0.229743	0.818291	0.864202
YLR009W	YLR009W	YLR009W	CDS	RLP24	3603.86	2752.03	0.389176	0.0518487	7.50599	6.09682e-14	2.19485e-13
YKL116C	YKL116C	YKL116C	CDS	PRR1	1010.28	864.752	0.222672	0.0681949	3.26522	0.00109377	0.00198775
YBR209W	YBR209W	YBR209W	CDS	YBR209W	13.6074	7.91674	0.793431	0.622309	1.27498	0.202317	0.264257
YGR238C	YGR238C	YGR238C	CDS	KEL2	1891.35	1531.34	0.30462	0.0550151	5.53701	3.07674e-08	8.00296e-08
YER044C	YER044C	YER044C	CDS	ERG28	1448.4	2347.31	-0.696466	0.0589353	-11.8175	3.17084e-32	2.20131e-31
YDR534C	YDR534C	YDR534C	CDS	FIT1	373.858	247.985	0.594663	0.12053	4.93374	8.06707e-07	1.90661e-06
tG%28GCC%29C	tG%28GCC%29C	tG%28GCC%29C	noncoding_exon	SUF16	0.582537	0	1.64928	4.38201	0.376376	0.706638	0.771842
YLR105C	YLR105C	YLR105C	CDS	SEN2	1826.84	1144.72	0.674822	0.0634566	10.6344	2.0619e-26	1.22036e-25
YML091C	YML091C	YML091C	CDS	RPM2	15996.4	19426.7	-0.280372	0.0362418	-7.73616	1.02461e-14	3.83282e-14
tC%28GCA%29P1	tC%28GCA%29P1	tC%28GCA%29P1	noncoding_exon	tC%28GCA%29P1	1.77193	2.47025	-0.496298	1.73411	-0.286198	0.774727	0.829352
tC%28GCA%29P2	tC%28GCA%29P2	tC%28GCA%29P2	noncoding_exon	tC%28GCA%29P2	0.335195	0	0.910968	4.40736	0.206693	0.83625	0.876801
YDL098C	YDL098C	YDL098C	CDS	SNU23	388.38	358.496	0.112931	0.11478	0.98389	0.32517	0.402657
YLR202C	YLR202C	YLR202C	CDS	YLR202C	575.259	373.348	0.624653	0.0955639	6.5365	6.2975e-11	1.9206e-10
tG%28GCC%29G1	tG%28GCC%29G1	tG%28GCC%29G1	noncoding_exon	tG%28GCC%29G1	3.79121	8.06612	-1.10483	0.990901	-1.11497	0.264861	0.336448
YKR005C	YKR005C	YKR005C	CDS	YKR005C	445.503	334.694	0.414228	0.105203	3.93741	8.23643e-05	0.000166637
YMR143W	YMR143W	YMR143W	CDS	RPS16A	11739.4	6341.66	0.888358	0.0480413	18.4916	2.41485e-76	4.33555e-75
YCR063W	YCR063W	YCR063W	CDS	BUD31	204.154	190.76	0.107206	0.171851	0.623833	0.532738	0.617337
YNL189W	YNL189W	YNL189W	CDS	SRP1	2955.71	3798.85	-0.362272	0.0499665	-7.25029	4.15865e-13	1.43853e-12
YCL047C	YCL047C	YCL047C	CDS	POF1	285.914	347.994	-0.282007	0.114048	-2.47272	0.0134091	0.021313
YGL122C	YGL122C	YGL122C	CDS	NAB2	6908.29	6231.14	0.148563	0.0400059	3.71352	0.000204393	0.00040008
YDL018C	YDL018C	YDL018C	CDS	ERP3	821.346	1089.79	-0.408761	0.0683513	-5.98029	2.22736e-09	6.19263e-09
YNL303W	YNL303W	YNL303W	CDS	YNL303W	46.2667	56.3918	-0.294137	0.318616	-0.923172	0.355917	0.435481
YPR160W	YPR160W	YPR160W	CDS	GPH1	16242.3	32436.9	-0.997765	0.0311243	-32.0574	1.72865e-225	1.80192e-223
YBL060W	YBL060W	YBL060W	CDS	YEL1	952.249	985.631	-0.0474122	0.0746878	-0.634805	0.525556	0.610018
YBR019C	YBR019C	YBR019C	CDS	GAL10	125.988	95.9871	0.39513	0.248594	1.58946	0.111956	0.154587
YKL056C	YKL056C	YKL056C	CDS	TMA19	12009.4	14397.8	-0.261718	0.0412198	-6.34934	2.16238e-10	6.36413e-10
tG%28GCC%29J1	tG%28GCC%29J1	tG%28GCC%29J1	noncoding_exon	tG%28GCC%29J1	0	0.697179	-1.93507	4.36595	-0.443219	0.657607	0.730862
YGR160W	YGR160W	YGR160W	CDS	YGR160W	17.0958	10.7375	0.656135	0.595156	1.10246	0.270262	0.342064
tG%28GCC%29J2	tG%28GCC%29J2	tG%28GCC%29J2	noncoding_exon	SUF23	0.36718	3.47421	-3.28829	1.84777	-1.7796	0.0751416	0.106795
YPL068C	YPL068C	YPL068C	CDS	YPL068C	685.372	569.121	0.267889	0.103842	2.57977	0.00988662	0.0159834
YJR057W	YJR057W	YJR057W	CDS	CDC8	1205.04	1014.69	0.249412	0.0669156	3.72726	0.000193573	0.000379539
YGL211W	YGL211W	YGL211W	CDS	NCS6	1471.17	1454.76	0.0165357	0.0651779	0.253701	0.799727	0.85152
YFL032W	YFL032W	YFL032W	CDS	YFL032W	865.15	1032.32	-0.256147	0.100994	-2.53626	0.0112043	0.0179976
YPL195W	YPL195W	YPL195W	CDS	APL5	2832.18	3511.35	-0.310016	0.0701553	-4.41899	9.91613e-06	2.15813e-05
YCL044C	YCL044C	YCL044C	CDS	MGR1	1874.46	1675.58	0.162607	0.0612134	2.6564	0.00789805	0.012909
YAL059W	YAL059W	YAL059W	CDS	ECM1	926.97	789.687	0.232669	0.0761012	3.05736	0.00223294	0.00390778
YNL007C	YNL007C	YNL007C	CDS	SIS1	6914.46	3974.13	0.79851	0.0371653	21.4854	2.13411e-102	5.91453e-101
YPL148C	YPL148C	YPL148C	CDS	PPT2	413.466	484.951	-0.226299	0.104285	-2.17	0.0300069	0.0452924
YJR137C	YJR137C	YJR137C	CDS	MET5	1294.01	1890.25	-0.548122	0.0626655	-8.74679	2.19506e-18	9.64777e-18
YMR021C	YMR021C	YMR021C	CDS	MAC1	2081.35	1336.42	0.639401	0.0718706	8.89655	5.7611e-19	2.5925e-18
tG%28GCC%29P1	tG%28GCC%29P1	tG%28GCC%29P1	noncoding_exon	tG%28GCC%29P1	8.95474	19.529	-1.12189	0.55746	-2.0125	0.0441668	0.0649528
YMR074C	YMR074C	YMR074C	CDS	YMR074C	2763.47	2483.74	0.154612	0.0506615	3.05187	0.0022742	0.00397573
YGR203W	YGR203W	YGR203W	CDS	YCH1	425.783	418.881	0.0262592	0.106401	0.246794	0.805067	0.855667
YJR039W	YJR039W	YJR039W	CDS	YJR039W	2115.42	1520.38	0.475719	0.0530622	8.96531	3.094e-19	1.40956e-18
YDL158C	YDL158C	YDL158C	CDS	YDL158C	179.923	266.1	-0.568024	0.332	-1.71091	0.0870974	0.122515
YOR104W	YOR104W	YOR104W	CDS	PIN2	1266.1	1236.67	0.033793	0.0683394	0.494488	0.620962	0.698762
YFL009W	YFL009W	YFL009W	CDS	CDC4	2805.37	2385.68	0.23369	0.0519517	4.49822	6.85237e-06	1.51398e-05
YLR297W	YLR297W	YLR297W	CDS	YLR297W	997.209	771.679	0.368265	0.0724455	5.08334	3.7085e-07	9.01502e-07
tH%28GUG%29E2	tH%28GUG%29E2	tH%28GUG%29E2	noncoding_exon	tH%28GUG%29E2	3.12038	7.98441	-1.32989	0.889951	-1.49434	0.135086	0.183871
YDR216W	YDR216W	YDR216W	CDS	ADR1	12941.8	8302.26	0.639837	0.0418126	15.3025	7.35732e-53	8.72385e-52
YIL120W	YIL120W	YIL120W	CDS	QDR1	807.158	940.338	-0.221098	0.0722711	-3.05929	0.00221866	0.00388836
YNL021W	YNL021W	YNL021W	CDS	HDA1	1763.09	1456.99	0.273019	0.0622525	4.38567	1.15628e-05	2.50557e-05
YGR095C	YGR095C	YGR095C	CDS	RRP46	972.105	1175.12	-0.273008	0.0765804	-3.56499	0.000363873	0.000696053
YCL027W	YCL027W	YCL027W	CDS	FUS1	387.902	438.534	-0.172344	0.0795777	-2.16573	0.030332	0.0457338
snR3	snR3	snR3	noncoding_exon	SNR3	97.2641	53.6296	0.849223	0.283248	2.99816	0.00271614	0.00470825
snR5	snR5	snR5	noncoding_exon	SNR5	404.402	303.793	0.413618	0.120939	3.42006	0.000626063	0.00116816
snR4	snR4	snR4	noncoding_exon	SNR4	1279.9	867.89	0.562617	0.0925713	6.07766	1.2195e-09	3.43704e-09
snR6	snR6	snR6	noncoding_exon	SNR6	74.1404	45.7454	0.689807	0.328624	2.09907	0.0358104	0.0533831
snR9	snR9	snR9	noncoding_exon	SNR9	247.014	170.753	0.53193	0.160311	3.31811	0.000906295	0.00166174
snR8	snR8	snR8	noncoding_exon	SNR8	215.306	157.78	0.451628	0.185282	2.43752	0.0147885	0.0233778
YHR029C	YHR029C	YHR029C	CDS	YHI9	1032.16	1396.36	-0.433972	0.0730114	-5.94389	2.78329e-09	7.70147e-09
YIR021W-A	YIR021W-A	YIR021W-A	CDS	YIR021W-A	22.6781	39.4682	-0.805071	0.336504	-2.39246	0.016736	0.0262367
YAL033W	YAL033W	YAL033W	CDS	POP5	644.487	572.863	0.168264	0.0926206	1.8167	0.0692631	0.098923
YBR284W	YBR284W	YBR284W	CDS	YBR284W	1373.56	968.56	0.50314	0.071329	7.0538	1.74102e-12	5.80674e-12
YNR036C	YNR036C	YNR036C	CDS	MRPS12	4531.33	5779.36	-0.350354	0.0578297	-6.05837	1.37504e-09	3.85983e-09
YNR049C	YNR049C	YNR049C	CDS	MSO1	1117.02	1290.79	-0.209025	0.0640126	-3.26538	0.00109319	0.00198721
YDR192C	YDR192C	YDR192C	CDS	NUP42	813.82	932.609	-0.195569	0.0752845	-2.59773	0.00938427	0.0152135
YOL112W	YOL112W	YOL112W	CDS	MSB4	1551.63	1620.91	-0.0616392	0.0673145	-0.91569	0.359829	0.439883
YML109W	YML109W	YML109W	CDS	ZDS2	1319.54	1119.5	0.236498	0.0678703	3.48456	0.000492955	0.000928479
YOL083W	YOL083W	YOL083W	CDS	ATG34	2041.23	3566.09	-0.80655	0.0457683	-17.6225	1.65663e-69	2.61763e-68
YNL251C	YNL251C	YNL251C	CDS	NRD1	3226.57	4419.06	-0.453317	0.0445241	-10.1814	2.40134e-24	1.32892e-23
YBR266C	YBR266C	YBR266C	CDS	SLM6	3.21633	4.87472	-0.577931	0.955394	-0.604914	0.545236	0.62941
YBL004W	YBL004W	YBL004W	CDS	UTP20	3353.54	2819.89	0.249505	0.0490506	5.08668	3.64385e-07	8.86095e-07
YER145C-A	YER145C-A	YER145C-A	CDS	YER145C-A	12.7302	12.1079	0.0601555	0.680449	0.0884055	0.929554	0.952047
YBR164C	YBR164C	YBR164C	CDS	ARL1	999.644	1469.3	-0.558263	0.0690096	-8.08965	5.9838e-16	2.37448e-15
YHR074W	YHR074W	YHR074W	CDS	QNS1	3331.32	4511.58	-0.437668	0.0434369	-10.0759	7.05883e-24	3.8575e-23
YDR464W	YDR464W	YDR464W	CDS	SPP41	4789.56	4949.54	-0.0476142	0.0550275	-0.865279	0.386886	0.468448
YFR030W	YFR030W	YFR030W	CDS	MET10	2004.41	2720.71	-0.441165	0.0516085	-8.5483	1.24916e-17	5.36209e-17
YJL146W	YJL146W	YJL146W	CDS	IDS2	1007.54	1199.93	-0.252336	0.0596879	-4.22759	2.36209e-05	4.97641e-05
YKL078W	YKL078W	YKL078W	CDS	DHR2	266.673	352.439	-0.401982	0.131481	-3.05734	0.0022331	0.00390778
YIL055C	YIL055C	YIL055C	CDS	YIL055C	3610.14	2559.78	0.494676	0.0496111	9.97106	2.04029e-23	1.0894e-22
YPL053C	YPL053C	YPL053C	CDS	KTR6	2638.03	2826.47	-0.0989757	0.0453221	-2.18383	0.0289749	0.0438105
YLR351C	YLR351C	YLR351C	CDS	NIT3	4852.58	4225.89	0.20017	0.0383889	5.21426	1.84552e-07	4.57711e-07
YJR111C	YJR111C	YJR111C	CDS	YJR111C	916.854	1016.64	-0.148071	0.0725299	-2.04151	0.0411998	0.0608843
tH%28GUG%29G1	tH%28GUG%29G1	tH%28GUG%29G1	noncoding_exon	tH%28GUG%29G1	1.00559	1.99011	-1.004	1.73824	-0.577595	0.563538	0.647327
YKL032C	YKL032C	YKL032C	CDS	IXR1	6343.75	4271.48	0.571361	0.0492393	11.6038	3.9434e-31	2.638e-30
YER125W	YER125W	YER125W	CDS	RSP5	5471.08	6134.37	-0.165425	0.0456574	-3.62319	0.000290991	0.000561094
YER152C	YER152C	YER152C	CDS	YER152C	6237.33	4499.12	0.472069	0.0502242	9.39923	5.49623e-21	2.70322e-20
YLR015W	YLR015W	YLR015W	CDS	BRE2	2093.61	1288.44	0.698653	0.0601397	11.6172	3.37146e-31	2.26189e-30
YHR116W	YHR116W	YHR116W	CDS	COX23	616.576	582.154	0.0832586	0.0777011	1.07152	0.283934	0.357425
YPL259C	YPL259C	YPL259C	CDS	APM1	1856.25	2020.85	-0.124527	0.0554262	-2.24671	0.0246584	0.0376411
YOL100W	YOL100W	YOL100W	CDS	PKH2	3869.85	2960.88	0.385501	0.043218	8.91992	4.66607e-19	2.11198e-18
YGR093W	YGR093W	YGR093W	CDS	DRN1	1065.33	1252.96	-0.233932	0.0689113	-3.39469	0.000687075	0.00127451
tH%28GUG%29H	tH%28GUG%29H	tH%28GUG%29H	noncoding_exon	tH%28GUG%29H	0	0.306789	-1.01254	4.40736	-0.229739	0.818295	0.864202
YLR334C	YLR334C	YLR334C	CDS	YLR334C	5.10767	5.65186	-0.142964	0.906697	-0.157675	0.874713	0.907861
YHL043W	YHL043W	YHL043W	CDS	ECM34	23.4764	17.7756	0.400005	0.484972	0.8248	0.409485	0.492991
YOR364W	YOR364W	YOR364W	CDS	YOR364W	55.8403	42.1691	0.385436	0.273048	1.41161	0.158066	0.211846
YOR386W	YOR386W	YOR386W	CDS	PHR1	1815.36	1773.26	0.0345195	0.0542919	0.635814	0.524898	0.609356
YCL011C	YCL011C	YCL011C	CDS	GBP2	5819.53	5437.64	0.0982541	0.0372682	2.63641	0.00837887	0.0136724
YPR198W	YPR198W	YPR198W	CDS	SGE1	2158.78	1906.78	0.178351	0.0548008	3.25453	0.00113582	0.00205773
YHL038C	YHL038C	YHL038C	CDS	CBP2	844.778	1233.22	-0.548139	0.0682423	-8.03225	9.57032e-16	3.75501e-15
YLL053C	YLL053C	YLL053C	CDS	YLL053C	697.528	473.52	0.561362	0.0894302	6.2771	3.44952e-10	1.00507e-09
YDR425W	YDR425W	YDR425W	CDS	SNX41	2398.62	2414.23	-0.00871008	0.049797	-0.174912	0.861149	0.896877
YOR331C	YOR331C	YOR331C	CDS	YOR331C	8.83062	12.564	-0.486859	0.587888	-0.82815	0.407586	0.490959
YML076C	YML076C	YML076C	CDS	WAR1	2570.83	2057.29	0.322036	0.0551678	5.8374	5.3023e-09	1.4454e-08
YKR060W	YKR060W	YKR060W	CDS	UTP30	474.344	561.531	-0.245714	0.101975	-2.40955	0.0159721	0.0251293
tH%28GUG%29K	tH%28GUG%29K	tH%28GUG%29K	noncoding_exon	tH%28GUG%29K	0.670391	2.01408	-1.60361	1.86049	-0.861931	0.388725	0.47035
YMR091C	YMR091C	YMR091C	CDS	NPL6	1735.7	1626.02	0.094874	0.0642807	1.47593	0.139962	0.189952
YER012W	YER012W	YER012W	CDS	PRE1	3421.64	4247.92	-0.312882	0.0425292	-7.35688	1.88259e-13	6.62367e-13
YHR098C	YHR098C	YHR098C	CDS	SFB3	3409.26	3282.34	0.054931	0.0561053	0.979069	0.327546	0.40524
YDL135C	YDL135C	YDL135C	CDS	RDI1	1760.52	2269.62	-0.369197	0.0575227	-6.41829	1.37814e-10	4.09571e-10
YCR093W	YCR093W	YCR093W	CDS	CDC39	6442.03	5410.28	0.252179	0.0384334	6.56145	5.32857e-11	1.63509e-10
tH%28GUG%29Q	tH%28GUG%29Q	tH%28GUG%29Q	noncoding_exon	tH%28GUG%29Q	1.98729	7.72557	-1.96976	1.03186	-1.90894	0.0562699	0.0816516
tI%28AAU%29E2	tI%28AAU%29E2	tI%28AAU%29E2	noncoding_exon	tI%28AAU%29E2	3.1447	1.00397	1.62371	1.80796	0.898089	0.369138	0.449531
YBR069C	YBR069C	YBR069C	CDS	TAT1	4489.65	5795.25	-0.368229	0.0446365	-8.24949	1.59076e-16	6.48941e-16
tI%28AAU%29G	tI%28AAU%29G	tI%28AAU%29G	noncoding_exon	tI%28AAU%29G	0.582537	3.1914	-2.35719	1.87949	-1.25417	0.209781	0.272934
tI%28AAU%29I2	tI%28AAU%29I2	tI%28AAU%29I2	noncoding_exon	tI%28AAU%29I2	0.582537	1.65935	-1.46285	2.59913	-0.562821	0.573557	0.656891
YDR512C	YDR512C	YDR512C	CDS	EMI1	1422.3	2122.86	-0.57832	0.0814406	-7.10113	1.2374e-12	4.1628e-12
YPR012W	YPR012W	YPR012W	CDS	YPR012W	45.975	47.6819	-0.0527437	0.274852	-0.191899	0.847822	0.88614
YGR255C	YGR255C	YGR255C	CDS	COQ6	2033.1	2467.55	-0.279367	0.0530396	-5.26714	1.38567e-07	3.46491e-07
YDL051W	YDL051W	YDL051W	CDS	LHP1	2206.26	2976.21	-0.432424	0.0471188	-9.17731	4.42008e-20	2.08299e-19
YBL102W	YBL102W	YBL102W	CDS	SFT2	3200.78	3328.33	-0.056603	0.0547594	-1.03367	0.301292	0.376763
YPL237W	YPL237W	YPL237W	CDS	SUI3	7715.19	6899.94	0.160987	0.0448627	3.58843	0.000332679	0.000638305
tI%28AAU%29L1	tI%28AAU%29L1	tI%28AAU%29L1	noncoding_exon	tI%28AAU%29L1	0	0.372564	-1.01256	4.40736	-0.229743	0.818291	0.864202
YCL001W-B	YCL001W-B	YCL001W-B	CDS	YCL001W-B	43.0385	29.4157	0.537231	0.327064	1.64259	0.100468	0.139775
YEL043W	YEL043W	YEL043W	CDS	YEL043W	2919.51	3939.3	-0.432286	0.0549195	-7.87127	3.51058e-15	1.33394e-14
YNL068C	YNL068C	YNL068C	CDS	FKH2	2663.46	2490.99	0.0965071	0.0477641	2.0205	0.043332	0.0638193
YJL169W	YJL169W	YJL169W	CDS	YJL169W	5.2079	6.6257	-0.422566	0.6212	-0.680242	0.496351	0.580851
tI%28AAU%29N1	tI%28AAU%29N1	tI%28AAU%29N1	noncoding_exon	tI%28AAU%29N1	0	1.11769	-2.5938	2.70259	-0.959746	0.337183	0.415177
tI%28AAU%29N2	tI%28AAU%29N2	tI%28AAU%29N2	noncoding_exon	tI%28AAU%29N2	2.5259	0.655378	1.92759	1.65911	1.16183	0.245306	0.314227
tI%28GAU%29Q	tI%28GAU%29Q	tI%28GAU%29Q	noncoding_exon	tI%28GAU%29Q	0	0.348589	-1.01256	4.40736	-0.229743	0.818291	0.864202
tT%28AGU%29N2	tT%28AGU%29N2	tT%28AGU%29N2	noncoding_exon	tT%28AGU%29N2	0	0	0	4.40736	0	1	1
YBR112C	YBR112C	YBR112C	CDS	CYC8	3675.59	3826.73	-0.0578005	0.0432088	-1.3377	0.180994	0.239133
YBL081W	YBL081W	YBL081W	CDS	YBL081W	1052.42	927.754	0.181855	0.0828901	2.19393	0.0282407	0.0427745
YFL040W	YFL040W	YFL040W	CDS	YFL040W	26.7644	17.5752	0.623359	0.423071	1.47341	0.14064	0.190761
YNL326C	YNL326C	YNL326C	CDS	PFA3	541.832	567.164	-0.0658161	0.105208	-0.625582	0.531589	0.616202
tK%28CUU%29D1	tK%28CUU%29D1	tK%28CUU%29D1	noncoding_exon	tK%28CUU%29D1	0.582537	2.09768	-1.74326	1.8035	-0.966596	0.333746	0.411744
YJL061W	YJL061W	YJL061W	CDS	NUP82	1657.63	1948.23	-0.232905	0.0523041	-4.45289	8.47216e-06	1.85485e-05
YPR147C	YPR147C	YPR147C	CDS	YPR147C	1066.36	1322.29	-0.310559	0.0626099	-4.96022	7.04142e-07	1.67156e-06
tK%28CUU%29E2	tK%28CUU%29E2	tK%28CUU%29E2	noncoding_exon	tK%28CUU%29E2	0	0.721153	-1.9668	2.87887	-0.683183	0.494491	0.579157
YDR441C	YDR441C	YDR441C	CDS	APT2	1259.27	1248.78	0.0115281	0.0616203	0.187082	0.851596	0.888755
YPL094C	YPL094C	YPL094C	CDS	SEC62	3010.2	3837.56	-0.350132	0.0496196	-7.05633	1.70957e-12	5.70455e-12
YPL023C	YPL023C	YPL023C	CDS	MET12	4619.16	3503.34	0.398775	0.039556	10.0813	6.68502e-24	3.65608e-23
YER020W	YER020W	YER020W	CDS	GPA2	13617.7	9489.27	0.521588	0.0440187	11.8492	2.17187e-32	1.51381e-31
YDR231C	YDR231C	YDR231C	CDS	COX20	5228.61	6001.25	-0.19809	0.0393617	-5.03257	4.8396e-07	1.1643e-06
YJL112W	YJL112W	YJL112W	CDS	MDV1	3055.77	4631.18	-0.600549	0.0368244	-16.3084	8.5951e-60	1.17014e-58
YFL066C	YFL066C	YFL066C	CDS	YFL066C	2.41034	1.74295	0.462437	1.71241	0.27005	0.787122	0.840946
YNL193W	YNL193W	YNL193W	CDS	YNL193W	2532.17	1438.32	0.814775	0.0590744	13.7924	2.83348e-43	2.63854e-42
tP%28UGG%29O1	tP%28UGG%29O1	tP%28UGG%29O1	noncoding_exon	tP%28UGG%29O1	0	0
YML058W	YML058W	YML058W	CDS	SML1	15576.1	12128.2	0.361081	0.0330496	10.9254	8.71439e-28	5.3528e-27
YBR188C	YBR188C	YBR188C	CDS	NTC20	458.083	719.663	-0.652021	0.0898261	-7.25871	3.90805e-13	1.35319e-12
YLR435W	YLR435W	YLR435W	CDS	TSR2	670.497	453.663	0.566064	0.107751	5.25347	1.49258e-07	3.72558e-07
YJR076C	YJR076C	YJR076C	CDS	CDC11	2241	3003.18	-0.42119	0.0612906	-6.87202	6.32985e-12	2.03722e-11
YKL157W	YKL157W	YKL157W	CDS	APE2	9614.29	12163.3	-0.3393	0.0336141	-10.094	5.87423e-24	3.21518e-23
YBR003W	YBR003W	YBR003W	CDS	COQ1	1849.39	2661.16	-0.526862	0.0462992	-11.3795	5.29071e-30	3.45008e-29
YOL140W	YOL140W	YOL140W	CDS	ARG8	1303.64	1937.29	-0.572168	0.0636872	-8.98404	2.61012e-19	1.193e-18
YPR129W	YPR129W	YPR129W	CDS	SCD6	3287.92	4045.01	-0.298334	0.041524	-7.18462	6.73953e-13	2.30278e-12
YDL113C	YDL113C	YDL113C	CDS	ATG20	3427.72	2970.62	0.207371	0.0456473	4.54289	5.54883e-06	1.23654e-05
YMR135C	YMR135C	YMR135C	CDS	GID8	15791.5	9071.52	0.799811	0.036311	22.0267	1.5991e-107	4.77268e-106
tK%28CUU%29G1	tK%28CUU%29G1	tK%28CUU%29G1	noncoding_exon	tK%28CUU%29G1	0.949717	0.348589	1.38441	2.43384	0.568819	0.569479	0.65297
YPL005W	YPL005W	YPL005W	CDS	AEP3	1364.16	791.229	0.785941	0.0751672	10.4559	1.3767e-25	7.91999e-25
YBR247C	YBR247C	YBR247C	CDS	ENP1	947.25	1376.89	-0.539293	0.0681096	-7.91801	2.41332e-15	9.25063e-15
tK%28CUU%29G3	tK%28CUU%29G3	tK%28CUU%29G3	noncoding_exon	tK%28CUU%29G3	0	1.00397	-2.46912	2.91475	-0.847112	0.396933	0.479367
YJL210W	YJL210W	YJL210W	CDS	PEX2	2194.37	1409.18	0.641136	0.0666465	9.61995	6.58625e-22	3.34048e-21
YAL010C	YAL010C	YAL010C	CDS	MDM10	1128.05	1017.28	0.148565	0.0661459	2.24603	0.0247023	0.0376929
YIL154C	YIL154C	YIL154C	CDS	IMP2%27	4805	4616.64	0.058861	0.0591863	0.994504	0.319978	0.397538
tP%28UGG%29O3	tP%28UGG%29O3	tP%28UGG%29O3	noncoding_exon	tP%28UGG%29O3	0	0
YIL101C	YIL101C	YIL101C	CDS	XBP1	7681.09	7507.11	0.0334457	0.0417903	0.800322	0.423524	0.508142
YKL004W	YKL004W	YKL004W	CDS	AUR1	4282.18	3513.78	0.28607	0.0445449	6.42205	1.34453e-10	4.00263e-10
YOR208W	YOR208W	YOR208W	CDS	PTP2	4903.42	2574.89	0.92884	0.0446806	20.7885	5.50483e-96	1.38294e-94
YPL154C	YPL154C	YPL154C	CDS	PEP4	23501	30952.3	-0.397221	0.039879	-9.96066	2.2656e-23	1.2051e-22
YPL101W	YPL101W	YPL101W	CDS	ELP4	1569.16	1700.57	-0.116171	0.0583335	-1.99149	0.0464266	0.06819
YLR258W	YLR258W	YLR258W	CDS	GSY2	29256.7	18690.4	0.646737	0.0383963	16.8437	1.16625e-63	1.65887e-62
YBR178W	YBR178W	YBR178W	CDS	YBR178W	20.8861	28.9576	-0.467371	0.371197	-1.25909	0.207997	0.270916
YJR098C	YJR098C	YJR098C	CDS	YJR098C	858.848	875.936	-0.0292406	0.0785901	-0.372064	0.709845	0.774376
YHR176W	YHR176W	YHR176W	CDS	FMO1	956.737	870.826	0.138031	0.073693	1.87306	0.0610606	0.0881195
tV%28AAC%29H	tV%28AAC%29H	tV%28AAC%29H	noncoding_exon	tV%28AAC%29H	0.36718	0	0.910977	4.40736	0.206695	0.836248	0.876801
tK%28CUU%29I	tK%28CUU%29I	tK%28CUU%29I	noncoding_exon	tK%28CUU%29I	0	0.348589	-1.01255	3.99309	-0.253575	0.799824	0.85152
tV%28AAC%29L	tV%28AAC%29L	tV%28AAC%29L	noncoding_exon	tV%28AAC%29L	7.91289	6.47444	0.303669	0.809148	0.375295	0.707441	0.772599
tV%28AAC%29O	tV%28AAC%29O	tV%28AAC%29O	noncoding_exon	tV%28AAC%29O	4.69656	4.12959	0.21128	0.98424	0.214663	0.83003	0.873426
YJR018W	YJR018W	YJR018W	CDS	YJR018W	21.3493	14.2658	0.579917	0.472885	1.22634	0.220071	0.284678
YDL211C	YDL211C	YDL211C	CDS	YDL211C	193.821	195.775	-0.0104193	0.154883	-0.0672722	0.946365	0.965505
YDL244W	YDL244W	YDL244W	CDS	THI13	194.372	296.207	-0.604925	0.151557	-3.99139	6.56864e-05	0.000133709
tV%28AAC%29M2	tV%28AAC%29M2	tV%28AAC%29M2	noncoding_exon	tV%28AAC%29M2	10.0119	10.1638	-0.00331868	0.696468	-0.00476502	0.996198	0.998916
tV%28AAC%29M3	tV%28AAC%29M3	tV%28AAC%29M3	noncoding_exon	tV%28AAC%29M3	2.49391	2.45242	0.0582437	1.38271	0.0421228	0.966401	0.979976
tV%28AAC%29M1	tV%28AAC%29M1	tV%28AAC%29M1	noncoding_exon	tV%28AAC%29M1	1.69602	1.68332	-0.00592324	1.75029	-0.00338414	0.9973	0.999877
YDR319C	YDR319C	YDR319C	CDS	YFT2	1846.72	1741.49	0.0849678	0.0677013	1.25504	0.209464	0.272624
YKL095W	YKL095W	YKL095W	CDS	YJU2	733.665	981.684	-0.423352	0.0731868	-5.78453	7.27141e-09	1.96683e-08
YOL099C	YOL099C	YOL099C	CDS	YOL099C	23.3681	14.9869	0.645758	0.471072	1.37083	0.170429	0.226762
YIL094C	YIL094C	YIL094C	CDS	LYS12	2643.72	4198.83	-0.667417	0.0432313	-15.4383	9.04913e-54	1.09911e-52
YLR451W	YLR451W	YLR451W	CDS	LEU3	3002.8	1863.75	0.687425	0.0586212	11.7266	9.31663e-32	6.38541e-31
YFR017C	YFR017C	YFR017C	CDS	IGD1	12082.7	12768.2	-0.0794765	0.0537353	-1.47904	0.13913	0.18895
tK%28CUU%29P	tK%28CUU%29P	tK%28CUU%29P	noncoding_exon	tK%28CUU%29P	0	1.44231	-2.97426	2.67175	-1.11322	0.265612	0.337218
YHR017W	YHR017W	YHR017W	CDS	YSC83	2002.69	2011.28	-0.00609925	0.050309	-0.121236	0.903504	0.931651
YNR077C	YNR077C	YNR077C	CDS	YNR077C	1.00559	1.84073	-0.881951	3.84537	-0.229354	0.818594	0.864345
YOL044W	YOL044W	YOL044W	CDS	PEX15	1162.43	1130	0.040061	0.0667222	0.600414	0.54823	0.632239
tK%28UUU%29K	tK%28UUU%29K	tK%28UUU%29K	noncoding_exon	tK%28UUU%29K	0.582537	5.57743	-3.23738	4.23585	-0.764282	0.444699	0.529997
YOR085W	YOR085W	YOR085W	CDS	OST3	2046.17	2429.56	-0.247132	0.0560843	-4.40644	1.05083e-05	2.28345e-05
YGL067W	YGL067W	YGL067W	CDS	NPY1	938.178	1069.18	-0.188653	0.0753442	-2.50389	0.0122838	0.0196451
YOR050C	YOR050C	YOR050C	CDS	YOR050C	9.87204	5.86275	0.741206	0.836859	0.885699	0.37578	0.456902
YNL087W	YNL087W	YNL087W	CDS	TCB2	1907.64	1563.01	0.287104	0.0697227	4.1178	3.82503e-05	7.94588e-05
YGR114C	YGR114C	YGR114C	CDS	YGR114C	0	0	0	4.40736	0	1	1
YLR318W	YLR318W	YLR318W	CDS	EST2	1067.18	688.354	0.634381	0.07954	7.97563	1.51606e-15	5.87253e-15
YOR341W	YOR341W	YOR341W	CDS	RPA190	3041.33	3148.99	-0.0507956	0.0483105	-1.05144	0.293056	0.367716
YNL024C-A	YNL024C-A	YNL024C-A	CDS	KSH1	1160.29	941.765	0.299609	0.0684008	4.38019	1.18575e-05	2.56387e-05
YDR296W	YDR296W	YDR296W	CDS	MHR1	2681.01	4136.99	-0.626781	0.0420168	-14.9174	2.54017e-50	2.88934e-49
YGL232W	YGL232W	YGL232W	CDS	TAN1	783.884	1198.15	-0.614645	0.0774783	-7.93312	2.13709e-15	8.21884e-15
YPR091C	YPR091C	YPR091C	CDS	NVJ2	2593.35	2622.97	-0.0159808	0.0582393	-0.274399	0.783778	0.837757
YGR141W	YGR141W	YGR141W	CDS	VPS62	3363.54	3417.39	-0.023187	0.0411715	-0.56318	0.573312	0.656719
tL%28CAA%29A	tL%28CAA%29A	tL%28CAA%29A	noncoding_exon	SUP56	0	0.613578	-1.77192	4.37996	-0.404551	0.685808	0.753933
STRG.906					17548.8	23464.1	-0.419099	0.322245	-1.30056	0.193408	0.253712
YJR158W	YJR158W	YJR158W	CDS	HXT16	0	0	0	4.40736	0	1	1
tL%28CAA%29G2	tL%28CAA%29G2	tL%28CAA%29G2	noncoding_exon	SUP54	0	0.613578	-1.77192	4.37996	-0.404551	0.685808	0.753933
YBR116C	YBR116C	YBR116C	CDS	YBR116C	219.371	383.879	-0.809495	0.154006	-5.25625	1.47023e-07	3.6711e-07
YMR198W	YMR198W	YMR198W	CDS	CIK1	604.648	585.874	0.0462783	0.0989009	0.467925	0.639838	0.715667
YCR003W	YCR003W	YCR003W	CDS	MRPL32	802.895	1385.51	-0.786463	0.0742478	-10.5924	3.2318e-26	1.89991e-25
YMR316C-B	YMR316C-B	YMR316C-B	CDS	YMR316C-B	355.516	213.013	0.740312	0.132612	5.58253	2.37051e-08	6.20759e-08
YMR316C-A	YMR316C-A	YMR316C-A	CDS	YMR316C-A	25.0884	19.9631	0.333603	0.375135	0.889287	0.373849	0.454713
YMR163C	YMR163C	YMR163C	CDS	INP2	835.976	567.893	0.558663	0.0792903	7.04579	1.84417e-12	6.13319e-12
YGR294W	YGR294W	YGR294W	CDS	PAU12	44.3421	41.3691	0.105176	0.354598	0.296606	0.766767	0.822976
YEL008W	YEL008W	YEL008W	CDS	YEL008W	96.8671	58.9739	0.709985	0.213558	3.32455	0.000885602	0.00162508
YLL067C	YLL067C	YLL067C	CDS	YLL067C	116.928	70.8832	0.724096	0.212643	3.40521	0.000661129	0.0012303
YHR086W-A	YHR086W-A	YHR086W-A	CDS	YHR086W-A	3.59545	4.02817	-0.16791	1.1376	-0.1476	0.882658	0.914341
YBR020W	YBR020W	YBR020W	CDS	GAL1	467.545	335	0.47932	0.0968302	4.95011	7.41698e-07	1.75832e-06
YLR418C	YLR418C	YLR418C	CDS	CDC73	2142.95	1679.37	0.35071	0.0648221	5.41034	6.29046e-08	1.61398e-07
YDR112W	YDR112W	YDR112W	CDS	IRC2	6.17722	3.93653	0.691934	0.799287	0.865688	0.386661	0.468257
YER059W	YER059W	YER059W	CDS	PCL6	1436.32	1914.08	-0.415266	0.0681612	-6.09241	1.11222e-09	3.14482e-09
YPL153C	YPL153C	YPL153C	CDS	RAD53	539.948	627.221	-0.216277	0.0867465	-2.49321	0.0126596	0.0202136
YBL025W	YBL025W	YBL025W	CDS	RRN10	367.714	352.655	0.0578386	0.115917	0.498966	0.617803	0.695706
YOL066C	YOL066C	YOL066C	CDS	RIB2	1020.13	1189.86	-0.220852	0.0619011	-3.56782	0.000359969	0.000688962
YDR126W	YDR126W	YDR126W	CDS	SWF1	625.011	458.607	0.449373	0.101752	4.41635	1.00384e-05	2.18405e-05
YPL216W	YPL216W	YPL216W	CDS	YPL216W	713.24	635.251	0.164642	0.0769503	2.13959	0.0323876	0.0485709
YOR223W	YOR223W	YOR223W	CDS	DSC3	1856.93	1676.58	0.147366	0.0511625	2.88035	0.00397235	0.00675173
YEL022W	YEL022W	YEL022W	CDS	GEA2	1598.06	1611.93	-0.0147856	0.0710576	-0.208079	0.835167	0.876801
YIL053W	YIL053W	YIL053W	CDS	GPP1	3341.73	2870.96	0.219389	0.0545673	4.02052	5.80697e-05	0.000118723
YDL074C	YDL074C	YDL074C	CDS	BRE1	1653.45	1700.47	-0.0408083	0.0628707	-0.649083	0.516285	0.600855
YLR463C	YLR463C	YLR463C	CDS	YLR463C	38.2293	20.983	0.876737	0.378089	2.31886	0.0204024	0.0314757
YJL190C	YJL190C	YJL190C	CDS	RPS22A	5726.17	3348.33	0.773926	0.0581622	13.3063	2.1266e-40	1.84728e-39
YMR218C	YMR218C	YMR218C	CDS	TRS130	1419.96	1512.61	-0.0925093	0.0603365	-1.53322	0.125221	0.171479
YNL265C	YNL265C	YNL265C	CDS	IST1	2110.43	2766.46	-0.391064	0.059743	-6.54577	5.9188e-11	1.80826e-10
YNL230C	YNL230C	YNL230C	CDS	ELA1	891.884	750.243	0.250023	0.0746302	3.35016	0.000807634	0.0014863
YLL049W	YLL049W	YLL049W	CDS	LDB18	1825.66	1093.72	0.739597	0.0640404	11.5489	7.47545e-31	4.96279e-30
YHR211W	YHR211W	YHR211W	CDS	FLO5	1663.14	887.043	0.907663	0.0723294	12.549	4.02513e-36	3.1235e-35
YPR166C	YPR166C	YPR166C	CDS	MRP2	1104.51	1899.4	-0.783931	0.0621076	-12.6221	1.59429e-36	1.25248e-35
YJL042W	YJL042W	YJL042W	CDS	MHP1	9575.92	7931.07	0.272113	0.0466176	5.83712	5.31093e-09	1.44719e-08
YNL301C	YNL301C	YNL301C	CDS	RPL18B	2238.33	1848.53	0.276588	0.065716	4.20884	2.56685e-05	5.40128e-05
tL%28GAG%29G	tL%28GAG%29G	tL%28GAG%29G	noncoding_exon	tL%28GAG%29G	3.91061	1.73127	1.19151	1.22784	0.970414	0.33184	0.409755
YMR058W	YMR058W	YMR058W	CDS	FET3	5491.46	3838.42	0.517218	0.0475858	10.8692	1.61685e-27	9.84488e-27
YDR061W	YDR061W	YDR061W	CDS	YDR061W	1861.26	2465.76	-0.40493	0.0487837	-8.30052	1.03655e-16	4.2559e-16
YJR112W-A	YJR112W-A	YJR112W-A	CDS	YJR112W-A	597.601	704.111	-0.239089	0.078635	-3.04049	0.00236197	0.00412297
YOR290C	YOR290C	YOR290C	CDS	SNF2	4947.02	5111.23	-0.047401	0.0384793	-1.23186	0.218002	0.282472
YKL114C	YKL114C	YKL114C	CDS	APN1	1618.6	1886.8	-0.22242	0.065996	-3.3702	0.000751136	0.00138598
YML024W	YML024W	YML024W	CDS	RPS17A	10560.6	6367.12	0.730553	0.0451134	16.1937	5.58524e-59	7.5014e-58
YML093W	YML093W	YML093W	CDS	UTP14	2534.82	3416.98	-0.43153	0.0623182	-6.92462	4.37153e-12	1.42334e-11
YHR197W	YHR197W	YHR197W	CDS	RIX1	650.319	1082.91	-0.734712	0.101565	-7.23393	4.69208e-13	1.61745e-12
YDR276C	YDR276C	YDR276C	CDS	PMP3	9472.41	9875.13	-0.0599141	0.0311875	-1.92109	0.0547198	0.0795842
YLR200W	YLR200W	YLR200W	CDS	YKE2	1742.57	1466.16	0.249171	0.0682548	3.6506	0.000261628	0.000507417
YKR003W	YKR003W	YKR003W	CDS	OSH6	1324.52	1251.46	0.0804465	0.0705035	1.14103	0.253858	0.323944
tL%28UAA%29B1	tL%28UAA%29B1	tL%28UAA%29B1	noncoding_exon	tL%28UAA%29B1	0.702376	0	1.87922	3.18629	0.589783	0.555336	0.639378
tI%28AAU%29P2	tI%28AAU%29P2	tI%28AAU%29P2	noncoding_exon	tI%28AAU%29P2	0.291269	0	0.910987	4.40736	0.206697	0.836247	0.876801
YER175C	YER175C	YER175C	CDS	TMT1	1575.7	2167.42	-0.459995	0.0614311	-7.48798	6.99429e-14	2.51147e-13
YIR012W	YIR012W	YIR012W	CDS	SQT1	1249.34	1225.72	0.0296225	0.067902	0.436254	0.662652	0.734947
YDL183C	YDL183C	YDL183C	CDS	YDL183C	1460.19	1518.78	-0.0566993	0.0582607	-0.973201	0.330454	0.408187
YPL278C	YPL278C	YPL278C	CDS	YPL278C	339.663	219.916	0.619904	0.121757	5.09132	3.55578e-07	8.6528e-07
tL%28UAA%29B2	tL%28UAA%29B2	tL%28UAA%29B2	noncoding_exon	tL%28UAA%29B2	0.917732	3.05985	-1.68539	1.52595	-1.10449	0.269382	0.341135
tL%28UAA%29J	tL%28UAA%29J	tL%28UAA%29J	noncoding_exon	SUP51	2.3984	0.613578	1.86673	1.75277	1.06502	0.286867	0.360597
YCL049C	YCL049C	YCL049C	CDS	YCL049C	2154.81	2869.29	-0.412281	0.0484569	-8.50819	1.76662e-17	7.53701e-17
YBL066C	YBL066C	YBL066C	CDS	SEF1	4726.44	5106.23	-0.111682	0.0381653	-2.92626	0.00343063	0.00587674
YGL107C	YGL107C	YGL107C	CDS	RMD9	1336.01	1651.32	-0.303823	0.0606361	-5.0106	5.42603e-07	1.29957e-06
YGR271C-A	YGR271C-A	YGR271C-A	CDS	EFG1	783.953	1284.51	-0.711482	0.0813519	-8.74573	2.21574e-18	9.72641e-18
YDR169C	YDR169C	YDR169C	CDS	STB3	3034.97	3449.47	-0.185292	0.0475176	-3.89944	9.64154e-05	0.000194082
YLR410W-B	YLR410W-B	YLR410W-B	CDS	YLR410W-B	378.361	244.411	0.626966	0.122974	5.09837	3.42591e-07	8.34551e-07
YLR410W-A	YLR410W-A	YLR410W-A	CDS	YLR410W-A	11.8679	21.5548	-0.854385	0.468935	-1.82197	0.0684598	0.0978959
tL%28UAA%29L	tL%28UAA%29L	tL%28UAA%29L	noncoding_exon	tL%28UAA%29L	2.65768	0	3.81603	2.35862	1.61791	0.105683	0.146388
YMR272C	YMR272C	YMR272C	CDS	SCS7	17267.9	13001.5	0.409627	0.0376686	10.8745	1.52506e-27	9.29407e-27
YPR108W	YPR108W	YPR108W	CDS	RPN7	3123.46	3527.87	-0.175818	0.0400366	-4.39143	1.12605e-05	2.44158e-05
YKL054C	YKL054C	YKL054C	CDS	DEF1	6074.82	7993.55	-0.396123	0.0385538	-10.2746	9.17636e-25	5.15589e-24
YGR162W	YGR162W	YGR162W	CDS	TIF4631	3960.28	4486.32	-0.180522	0.0477679	-3.77915	0.000157366	0.000310551
YDL165W	YDL165W	YDL165W	CDS	CDC36	1285.27	1884.53	-0.552046	0.0579846	-9.52057	1.72237e-21	8.59832e-21
YDR520C	YDR520C	YDR520C	CDS	URC2	880.923	828.598	0.0882355	0.0757988	1.16407	0.244394	0.31324
YKL023W	YKL023W	YKL023W	CDS	YKL023W	2770.72	2671.17	0.0524587	0.0556206	0.943153	0.345602	0.424273
YJR051W	YJR051W	YJR051W	CDS	OSM1	2690.59	4622.45	-0.780843	0.0449584	-17.3681	1.43824e-67	2.19315e-66
YNL009W	YNL009W	YNL009W	CDS	IDP3	1288.32	1183.06	0.124395	0.057508	2.16309	0.0305339	0.0460283
YFL034W	YFL034W	YFL034W	CDS	YFL034W	1788.23	1695.99	0.0769828	0.0556293	1.38385	0.166403	0.221913
YKL164C	YKL164C	YKL164C	CDS	PIR1	9786.8	8577.57	0.190521	0.0498074	3.82515	0.000130694	0.000259825
YJR135C	YJR135C	YJR135C	CDS	MCM22	361.95	460.843	-0.352127	0.100911	-3.48948	0.000483965	0.00091253
tL%28UAG%29L1	tL%28UAG%29L1	tL%28UAG%29L1	noncoding_exon	tL%28UAG%29L1	0	1.49025	-3.02183	3.32009	-0.910166	0.362735	0.442737
YOR161W-A	YOR161W-A	YOR161W-A	CDS	YOR161W-A	11.7719	14.706	-0.326914	0.572533	-0.570995	0.568003	0.651599
YMR076C	YMR076C	YMR076C	CDS	PDS5	1907.53	1881.69	0.0199289	0.0762058	0.261514	0.793696	0.846286
YOR161W-B	YOR161W-B	YOR161W-B	CDS	YOR161W-B	43.8483	54.1539	-0.313201	0.295451	-1.06008	0.289109	0.363024
YJR037W	YJR037W	YJR037W	CDS	YJR037W	3.98652	3.91255	0.0395487	1.16019	0.0340882	0.972807	0.984704
YMR183C	YMR183C	YMR183C	CDS	SSO2	2181.65	2867.63	-0.394064	0.0474683	-8.30163	1.02691e-16	4.21878e-16
YNL027W	YNL027W	YNL027W	CDS	CRZ1	2420.89	2461.77	-0.025258	0.0509867	-0.495384	0.620329	0.698207
YJR154W	YJR154W	YJR154W	CDS	YJR154W	378.291	364.063	0.0542888	0.120446	0.450733	0.652182	0.726481
YLR291C	YLR291C	YLR291C	CDS	GCD7	2723.19	2052.48	0.407122	0.0460039	8.84973	8.77342e-19	3.92276e-18
YDR210W	YDR210W	YDR210W	CDS	YDR210W	1210.77	698.369	0.794303	0.0759868	10.4532	1.41688e-25	8.13771e-25
YIL122W	YIL122W	YIL122W	CDS	POG1	1602.13	1365.47	0.230535	0.052602	4.38263	1.17255e-05	2.53767e-05
YDL230W	YDL230W	YDL230W	CDS	PTP1	2594.46	1905.13	0.446932	0.0680809	6.56472	5.21301e-11	1.60034e-10
YJR113C	YJR113C	YJR113C	CDS	RSM7	3620.75	3707	-0.0340055	0.0464803	-0.731612	0.464405	0.549358
YGL075C	YGL075C	YGL075C	CDS	MPS2	546.198	568.399	-0.0582957	0.0906016	-0.643429	0.519946	0.60431
YHR041C	YHR041C	YHR041C	CDS	SRB2	443.552	499.939	-0.17215	0.14322	-1.202	0.229365	0.295932
YIL156W-B	YIL156W-B	YIL156W-B	CDS	YIL156W-B	1670.44	1505	0.151665	0.0672441	2.25544	0.024106	0.0368556
YIL156W-A	YIL156W-A	YIL156W-A	CDS	YIL156W-A	21.0977	16.5608	0.362065	0.449438	0.805595	0.420477	0.504745
tM%28CAU%29J3	tM%28CAU%29J3	tM%28CAU%29J3	noncoding_exon	IMT3	0	0.306789	-1.01256	4.40736	-0.229743	0.818291	0.864202
YGR097W	YGR097W	YGR097W	CDS	ASK10	5130.85	2948.06	0.800125	0.0446482	17.9207	8.13639e-72	1.35944e-70
YIL068C	YIL068C	YIL068C	CDS	SEC6	1253.45	1453.18	-0.212789	0.0613791	-3.46679	0.000526713	0.000989394
YCL025C	YCL025C	YCL025C	CDS	AGP1	17921.2	13898.4	0.367047	0.0520152	7.05653	1.70709e-12	5.69899e-12
YNR034W	YNR034W	YNR034W	CDS	SOL1	3114.9	2309.13	0.431995	0.0559183	7.72547	1.11444e-14	4.16663e-14
tM%28CAU%29O1	tM%28CAU%29O1	tM%28CAU%29O1	noncoding_exon	IMT1	0.582537	0	1.64928	4.38201	0.376376	0.706638	0.771842
YNL282W	YNL282W	YNL282W	CDS	POP3	221.209	206.332	0.0996126	0.140725	0.707851	0.479038	0.563138
YNL253W	YNL253W	YNL253W	CDS	TEX1	706.364	959.965	-0.443121	0.0808226	-5.48263	4.19038e-08	1.08472e-07
YGL144C	YGL144C	YGL144C	CDS	ROG1	466.466	307.683	0.603199	0.111309	5.41912	5.98918e-08	1.54007e-07
YDR190C	YDR190C	YDR190C	CDS	RVB1	3048.68	4329.74	-0.505984	0.0420895	-12.0216	2.73543e-33	1.9534e-32
tM%28CAU%29O2	tM%28CAU%29O2	tM%28CAU%29O2	noncoding_exon	EMT2	1.39281	3.45639	-1.34654	1.35429	-0.994276	0.320088	0.397563
YBL006C	YBL006C	YBL006C	CDS	LDB7	2166.55	1866.15	0.216489	0.0534349	4.05146	5.08998e-05	0.000104739
YGR108W	YGR108W	YGR108W	CDS	CLB1	565.218	1012.83	-0.842603	0.100926	-8.34875	6.89865e-17	2.85766e-16
YBR264C	YBR264C	YBR264C	CDS	YPT10	1222.17	1064.67	0.200628	0.0734348	2.73205	0.00629416	0.0104414
YBR231C	YBR231C	YBR231C	CDS	SWC5	1392.96	1065.46	0.38462	0.0724034	5.31217	1.08325e-07	2.72627e-07
tM%28CAU%29Q1	tM%28CAU%29Q1	tM%28CAU%29Q1	noncoding_exon	tM%28CAU%29Q1	6.29706	18.3634	-1.54471	0.644792	-2.39567	0.0165901	0.0260313
YPL197C	YPL197C	YPL197C	CDS	YPL197C	14.2663	9.31299	0.594632	0.556684	1.06817	0.285445	0.358939
YHR076W	YHR076W	YHR076W	CDS	PTC7	1140.07	1899.11	-0.738757	0.0577902	-12.7834	2.02906e-37	1.64016e-36
YDR462W	YDR462W	YDR462W	CDS	MRPL28	2018.63	2709.97	-0.423811	0.055227	-7.67398	1.66736e-14	6.1613e-14
YJL148W	YJL148W	YJL148W	CDS	RPA34	1507.08	1494.32	0.0119128	0.0751916	0.158433	0.874116	0.907376
YIL057C	YIL057C	YIL057C	CDS	RGI2	5210.71	4706.09	0.146479	0.0435497	3.36349	0.000769641	0.001419
YPL055C	YPL055C	YPL055C	CDS	LGE1	4226.4	2844.48	0.572273	0.0549786	10.409	2.25565e-25	1.29339e-24
YLR353W	YLR353W	YLR353W	CDS	BUD8	1196.44	1097.12	0.126297	0.0692882	1.82278	0.0683374	0.0977448
YIL148W	YIL148W	YIL148W	CDS	RPL40A	11772.1	8612.45	0.451192	0.0584207	7.72316	1.13481e-14	4.23373e-14
YNR016C	YNR016C	YNR016C	CDS	ACC1	26622.6	36071.2	-0.43821	0.0388694	-11.2739	1.76557e-29	1.13543e-28
tS%28AGA%29E	tS%28AGA%29E	tS%28AGA%29E	noncoding_exon	tS%28AGA%29E	3.82275	4.29126	-0.135798	1.12396	-0.120821	0.903833	0.931853
tN%28GUU%29C	tN%28GUU%29C	tN%28GUU%29C	noncoding_exon	tN%28GUU%29C	0	0.348589	-1.01255	4.40736	-0.229741	0.818293	0.864202
tN%28GUU%29F	tN%28GUU%29F	tN%28GUU%29F	noncoding_exon	tN%28GUU%29F	0.582537	2.66946	-2.11775	1.94357	-1.08962	0.275881	0.34823
tS%28AGA%29B	tS%28AGA%29B	tS%28AGA%29B	noncoding_exon	tS%28AGA%29B	1.03757	0.697179	0.563251	2.11965	0.265729	0.790448	0.843725
tS%28AGA%29M	tS%28AGA%29M	tS%28AGA%29M	noncoding_exon	tS%28AGA%29M	2.36641	1.37653	0.777492	1.63458	0.475652	0.634322	0.710864
tN%28GUU%29G	tN%28GUU%29G	tN%28GUU%29G	noncoding_exon	tN%28GUU%29G	0.335195	2.11551	-2.56799	2.04792	-1.25395	0.20986	0.272986
YER023C-A	YER023C-A	YER023C-A	CDS	YER023C-A	12.2832	13.5385	-0.17908	0.424648	-0.421713	0.673234	0.743957
tN%28GUU%29K	tN%28GUU%29K	tN%28GUU%29K	noncoding_exon	tN%28GUU%29K	1.98729	5.61559	-1.51305	1.20941	-1.25107	0.21091	0.27425
tP%28UGG%29F	tP%28UGG%29F	tP%28UGG%29F	noncoding_exon	SUF9	0.582537	0	1.64928	4.38201	0.376376	0.706638	0.771842
YHR114W	YHR114W	YHR114W	CDS	BZZ1	1550.27	1890.79	-0.288801	0.0542903	-5.31957	1.04014e-07	2.62156e-07
YGR028W	YGR028W	YGR028W	CDS	MSP1	2540.34	2401.55	0.0813708	0.050625	1.60732	0.107983	0.149426
YER150W	YER150W	YER150W	CDS	SPI1	43883.3	32735.3	0.422927	0.0514653	8.2177	2.0745e-16	8.41367e-16
YNL279W	YNL279W	YNL279W	CDS	PRM1	135.649	123.993	0.123289	0.147948	0.833324	0.404662	0.487857
YDR400W	YDR400W	YDR400W	CDS	URH1	605.152	483.948	0.324445	0.0872705	3.7177	0.000201047	0.000393861
YLR156C-A	YLR156C-A	YLR156C-A	CDS	YLR156C-A	0	0
YDL068W	YDL068W	YDL068W	CDS	YDL068W	11.2533	11.5361	-0.0411439	0.654944	-0.0628205	0.949909	0.968209
YOL027C	YOL027C	YOL027C	CDS	MDM38	5642.41	7722.18	-0.45265	0.0423571	-10.6865	1.17724e-26	7.01525e-26
YPL257W	YPL257W	YPL257W	CDS	YPL257W	361.153	306.22	0.237973	0.101374	2.34747	0.0189012	0.0293935
YPL120W	YPL120W	YPL120W	CDS	VPS30	973.281	1181.89	-0.280615	0.0708995	-3.95792	7.56042e-05	0.000153316
YOL145C	YOL145C	YOL145C	CDS	CTR9	2561.59	4105.5	-0.68075	0.0534732	-12.7307	3.99329e-37	3.17644e-36
YJL099W	YJL099W	YJL099W	CDS	CHS6	1570.98	1517.38	0.0496276	0.064102	0.774198	0.438814	0.523966
YDR034W-B	YDR034W-B	YDR034W-B	CDS	YDR034W-B	2053.08	1074.37	0.935307	0.076852	12.1702	4.47816e-34	3.28524e-33
YDR395W	YDR395W	YDR395W	CDS	SXM1	2433.3	2492.76	-0.0351135	0.0453714	-0.773913	0.438982	0.524077
YOL110W	YOL110W	YOL110W	CDS	SHR5	1781.82	1245.64	0.518236	0.0809722	6.40017	1.55208e-10	4.60286e-10
YDR005C	YDR005C	YDR005C	CDS	MAF1	1647.01	2078.78	-0.334992	0.0511767	-6.5458	5.91795e-11	1.80826e-10
YMR311C	YMR311C	YMR311C	CDS	GLC8	13504.4	12969.8	0.0582227	0.0441534	1.31865	0.187287	0.246562
tP%28UGG%29N1	tP%28UGG%29N1	tP%28UGG%29N1	noncoding_exon	tP%28UGG%29N1	1.209	0.348589	1.752	2.2285	0.786181	0.431762	0.516694
YBL039C	YBL039C	YBL039C	CDS	URA7	701.718	1110.08	-0.659149	0.0888914	-7.41521	1.21435e-13	4.31603e-13
YGR188C	YGR188C	YGR188C	CDS	BUB1	778.038	576.025	0.432722	0.0816137	5.30207	1.14497e-07	2.87849e-07
YOR362C	YOR362C	YOR362C	CDS	PRE10	5179.38	5232.44	-0.0148304	0.0384266	-0.385941	0.69954	0.766343
YPR106W	YPR106W	YPR106W	CDS	ISR1	1625.8	1168.09	0.475321	0.0607245	7.82749	4.97687e-15	1.88087e-14
YLR126C	YLR126C	YLR126C	CDS	YLR126C	820.381	612.356	0.420551	0.0859706	4.89179	9.99212e-07	2.34099e-06
YDL053C	YDL053C	YDL053C	CDS	PBP4	3145.14	4257.03	-0.436115	0.0514884	-8.47015	2.45083e-17	1.038e-16
YML074C	YML074C	YML074C	CDS	FPR3	24575	21734.9	0.177144	0.0538942	3.28689	0.00101301	0.00184915
YKR062W	YKR062W	YKR062W	CDS	TFA2	2485.25	2317.84	0.0995622	0.055311	1.80004	0.0718536	0.102392
YNL286W	YNL286W	YNL286W	CDS	CUS2	1117.47	1252.85	-0.16596	0.0818499	-2.02761	0.0425999	0.0628287
YER010C	YER010C	YER010C	CDS	YER010C	1817.93	1965.21	-0.111468	0.0666159	-1.6733	0.0942684	0.131885
YML003W	YML003W	YML003W	CDS	YML003W	473.788	421.038	0.173029	0.10617	1.62973	0.10316	0.143234
YMR097C	YMR097C	YMR097C	CDS	MTG1	2304.9	2408.29	-0.0640683	0.0483986	-1.32376	0.185582	0.244502
YDL133W	YDL133W	YDL133W	CDS	SRF1	1902.64	1306.01	0.541032	0.0693786	7.79826	6.27667e-15	2.36569e-14
YDR158W	YDR158W	YDR158W	CDS	HOM2	5801.93	7120.23	-0.295286	0.0399521	-7.391	1.45732e-13	5.16646e-13
YGR228W	YGR228W	YGR228W	CDS	YGR228W	1.3169	0.697179	0.930608	1.82278	0.510543	0.609671	0.688642
YHR096C	YHR096C	YHR096C	CDS	HXT5	17029.4	20586.9	-0.273853	0.0457347	-5.98786	2.12617e-09	5.92072e-09
YGL249W	YGL249W	YGL249W	CDS	ZIP2	143.634	141.095	0.0196205	0.169781	0.115564	0.907998	0.934528
YMR253C	YMR253C	YMR253C	CDS	YMR253C	1086.51	1326.69	-0.286791	0.0683169	-4.19796	2.69329e-05	5.65203e-05
YCR102C	YCR102C	YCR102C	CDS	YCR102C	460.491	241.114	0.932181	0.116889	7.97495	1.52448e-15	5.90189e-15
YJL127C-B	YJL127C-B	YJL127C-B	CDS	YJL127C-B	775.672	1271.7	-0.714365	0.0750988	-9.51233	1.86435e-21	9.29379e-21
YOR257W	YOR257W	YOR257W	CDS	CDC31	4084.61	3284.54	0.313922	0.0547988	5.72862	1.01251e-08	2.7208e-08
YGR002C	YGR002C	YGR002C	CDS	SWC4	1693.26	1645.93	0.0413455	0.052897	0.781623	0.434436	0.51936
YDR042C	YDR042C	YDR042C	CDS	YDR042C	184.591	121.906	0.602467	0.173467	3.47309	0.000514509	0.000968031
YGL042C	YGL042C	YGL042C	CDS	YGL042C	29.4502	38.3007	-0.38799	0.295262	-1.31405	0.188829	0.248358
YGR253C	YGR253C	YGR253C	CDS	PUP2	6427.79	7023.73	-0.127889	0.0344542	-3.71184	0.000205755	0.000402631
YDR510W	YDR510W	YDR510W	CDS	SMT3	4811.26	5579.74	-0.213166	0.0511996	-4.16342	3.1351e-05	6.55752e-05
YEL014C	YEL014C	YEL014C	CDS	YEL014C	1.92332	1.02794	0.92485	1.43297	0.645407	0.518664	0.603121
YDR467C	YDR467C	YDR467C	CDS	YDR467C	30.397	24.8999	0.281162	0.522263	0.538353	0.590334	0.670389
Q0115	Q0115	Q0115	CDS	BI3	0	0	0	4.40736	0
YPR045C	YPR045C	YPR045C	CDS	THP3	1963.45	1887.98	0.0556465	0.0545111	1.02083	0.307336	0.383223
YPR010C	YPR010C	YPR010C	CDS	RPA135	2684.53	3082.88	-0.199729	0.0570695	-3.49975	0.000465693	0.000879026
YPL231W	YPL231W	YPL231W	CDS	FAS2	27213.3	41626.5	-0.613102	0.0419237	-14.6243	1.96726e-48	2.12684e-47
YLR148W	YLR148W	YLR148W	CDS	PEP3	2499.44	2473.38	0.0143859	0.0539195	0.266803	0.789621	0.843228
YMR137C	YMR137C	YMR137C	CDS	PSO2	2100.79	2153.62	-0.0375972	0.0550793	-0.682602	0.494859	0.579395
YDL082W	YDL082W	YDL082W	CDS	RPL13A	5723.97	4447.58	0.364598	0.0558813	6.5245	6.82291e-11	2.0754e-10
YKL155C	YKL155C	YKL155C	CDS	RSM22	1040.63	1504.02	-0.532524	0.0704028	-7.56396	3.90986e-14	1.41705e-13
YBR162W-A	YBR162W-A	YBR162W-A	CDS	YSY6	2552.77	1565.47	0.705898	0.0583189	12.1041	1.00459e-33	7.27055e-33
YFL042C	YFL042C	YFL042C	CDS	YFL042C	3756.1	4208.71	-0.164513	0.0408451	-4.02773	5.63172e-05	0.000115309
YBL083C	YBL083C	YBL083C	CDS	YBL083C	28.4242	19.2105	0.581971	0.415462	1.40078	0.161279	0.215822
tQ%28UUG%29B	tQ%28UUG%29B	tQ%28UUG%29B	noncoding_exon	tQ%28UUG%29B	0.702376	3.13177	-2.20053	1.72308	-1.27709	0.201569	0.26333
YHR052W-A	YHR052W-A	YHR052W-A	CDS	YHR052W-A	2.27856	2.8029	-0.333803	1.3004	-0.256693	0.797416	0.849733
YPL096W	YPL096W	YPL096W	CDS	PNG1	1137.56	1680.59	-0.564591	0.0605994	-9.31678	1.19928e-20	5.78836e-20
tT%28UGU%29G2	tT%28UGU%29G2	tT%28UGU%29G2	noncoding_exon	tT%28UGU%29G2	4.72854	4.41856	0.112465	1.0439	0.107735	0.914206	0.939634
YDR335W	YDR335W	YDR335W	CDS	MSN5	5225.74	4735.95	0.141309	0.0386024	3.66062	0.000251605	0.000488384
tT%28UGU%29G1	tT%28UGU%29G1	tT%28UGU%29G1	noncoding_exon	tT%28UGU%29G1	0.36718	0.306789	-0.0507941	2.90163	-0.0175053	0.986033	0.992466
YJL067W	YJL067W	YJL067W	CDS	YJL067W	6.5444	9.29328	-0.498777	0.681046	-0.732369	0.463943	0.548997
YMR039C	YMR039C	YMR039C	CDS	SUB1	7525.13	7614.1	-0.0169507	0.0551321	-0.307457	0.758496	0.815853
YDR342C	YDR342C	YDR342C	CDS	HXT7	10868.1	8808.23	0.303232	0.046511	6.51959	7.04988e-11	2.14258e-10
YDR443C	YDR443C	YDR443C	CDS	SSN2	2316.45	2003.99	0.209111	0.0536318	3.89902	9.65827e-05	0.000194334
YCR095C	YCR095C	YCR095C	CDS	OCA4	1196.93	1342.28	-0.165504	0.0711018	-2.3277	0.0199281	0.0308119
YLL011W	YLL011W	YLL011W	CDS	SOF1	1730.36	1153.07	0.584289	0.0748717	7.80387	6.00365e-15	2.26524e-14
YCR077C	YCR077C	YCR077C	CDS	PAT1	4602.48	7108.82	-0.627337	0.0506535	-12.3849	3.1558e-35	2.39827e-34
tQ%28UUG%29D3	tQ%28UUG%29D3	tQ%28UUG%29D3	noncoding_exon	tQ%28UUG%29D3	0	0.306789	-1.01255	4.40736	-0.229741	0.818293	0.864202
YFL064C	YFL064C	YFL064C	CDS	YFL064C	1.57618	1.72512	-0.105984	1.60719	-0.0659436	0.947423	0.966379
YNL191W	YNL191W	YNL191W	CDS	DUG3	872.323	904.439	-0.0500442	0.0881625	-0.567636	0.570282	0.653677
YDR237W	YDR237W	YDR237W	CDS	MRPL7	1726.84	2987.48	-0.790265	0.0468924	-16.8527	1.00182e-63	1.4279e-62
YJL110C	YJL110C	YJL110C	CDS	GZF3	1611.53	1821.48	-0.177617	0.0548527	-3.23807	0.00120343	0.00217402
YKR048C	YKR048C	YKR048C	CDS	NAP1	12713.3	11709.6	0.118913	0.040787	2.91547	0.00355158	0.00607352
YBR001C	YBR001C	YBR001C	CDS	NTH2	3773.4	3036.24	0.31261	0.04399	7.10638	1.19123e-12	4.01522e-12
YPL003W	YPL003W	YPL003W	CDS	ULA1	1358.59	1126.34	0.271836	0.0561623	4.84018	1.2972e-06	3.02289e-06
YKL108W	YKL108W	YKL108W	CDS	SLD2	532.501	550.679	-0.0488538	0.105468	-0.46321	0.643214	0.718523
tQ%28UUG%29E1	tQ%28UUG%29E1	tQ%28UUG%29E1	noncoding_exon	tQ%28UUG%29E1	0.658449	5.00816	-2.93719	1.50489	-1.95176	0.0509664	0.0744352
YJR074W	YJR074W	YJR074W	CDS	MOG1	1099.13	1677.61	-0.60866	0.056995	-10.6792	1.27384e-26	7.57794e-26
tR%28ACG%29J	tR%28ACG%29J	tR%28ACG%29J	noncoding_exon	tR%28ACG%29J	2.12673	5.55407	-1.33809	1.23279	-1.08542	0.277734	0.350505
YDL148C	YDL148C	YDL148C	CDS	NOP14	1320.2	2198.27	-0.736913	0.06347	-11.6104	3.6488e-31	2.44326e-30
YAL012W	YAL012W	YAL012W	CDS	CYS3	8032.84	4754.07	0.757504	0.0586113	12.9242	3.28657e-38	2.72282e-37
YMR288W	YMR288W	YMR288W	CDS	HSH155	1426.26	1674.56	-0.230663	0.0593205	-3.88842	0.0001009	0.000202611
YIL156W	YIL156W	YIL156W	CDS	UBP7	2010.93	1760.56	0.193629	0.0544207	3.558	0.000373689	0.000713461
YBR241C	YBR241C	YBR241C	CDS	YBR241C	5183.1	5621.63	-0.116725	0.0659984	-1.7686	0.0769601	0.109201
YHR063W-A	YHR063W-A	YHR063W-A	CDS	YHR063W-A	5.3354	4.37061	0.273363	0.914668	0.298866	0.765042	0.821503
YJL212C	YJL212C	YJL212C	CDS	OPT1	1135.81	839.774	0.436971	0.0722494	6.0481	1.46565e-09	4.10923e-09
YPL156C	YPL156C	YPL156C	CDS	PRM4	3763.55	4142.07	-0.137918	0.043174	-3.19447	0.00140087	0.00251315
tR%28ACG%29L	tR%28ACG%29L	tR%28ACG%29L	noncoding_exon	tR%28ACG%29L	1.98729	0.721153	1.50315	1.73081	0.868468	0.385138	0.466899
tR%28ACG%29O	tR%28ACG%29O	tR%28ACG%29O	noncoding_exon	tR%28ACG%29O	1.32884	0.306789	1.85111	2.02475	0.914238	0.360592	0.44066
YDR099W	YDR099W	YDR099W	CDS	BMH2	15971.9	18817.5	-0.236597	0.0302996	-7.80857	5.78397e-15	2.18353e-14
YKL133C	YKL133C	YKL133C	CDS	YKL133C	3203.38	3145.18	0.0260385	0.0448484	0.580589	0.561518	0.645112
YKL188C	YKL188C	YKL188C	CDS	PXA2	1835.7	1309.03	0.488107	0.06032	8.09196	5.87121e-16	2.33511e-15
YHR170W	YHR170W	YHR170W	CDS	NMD3	2130.51	2739.02	-0.363948	0.0492501	-7.38978	1.47071e-13	5.20863e-13
YDR259C	YDR259C	YDR259C	CDS	YAP6	1665.93	1320.74	0.334543	0.079566	4.20459	2.61553e-05	5.49876e-05
YKL068W	YKL068W	YKL068W	CDS	NUP100	1965.01	1814	0.115827	0.0525718	2.20321	0.0275797	0.041864
YOR032C	YOR032C	YOR032C	CDS	HMS1	260.63	320.084	-0.293682	0.115285	-2.54744	0.0108516	0.0174666
YMR075C-A	YMR075C-A	YMR075C-A	CDS	YMR075C-A	39.1619	24.2876	0.690944	0.465366	1.48473	0.137615	0.18713
YMR002W	YMR002W	YMR002W	CDS	MIX17	12267.3	13103.9	-0.0948982	0.0554079	-1.71272	0.0867642	0.122096
SRG1	SRG1	SRG1	noncoding_exon	SRG1	7019.89	5756.3	0.28606	0.0450109	6.35535	2.0795e-10	6.12793e-10
YLR261C	YLR261C	YLR261C	CDS	VPS63	1017.47	684.898	0.573004	0.0861614	6.65036	2.9238e-11	9.08355e-11
tR%28ACG%29Q2	tR%28ACG%29Q2	tR%28ACG%29Q2	noncoding_exon	tR%28ACG%29Q2	0.702376	2.40447	-1.81748	1.87844	-0.967547	0.333271	0.411375
tI%28UAU%29L	tI%28UAU%29L	tI%28UAU%29L	noncoding_exon	tI%28UAU%29L	0	0
YER081W	YER081W	YER081W	CDS	SER3	5650.57	4884.67	0.210127	1.20615	0.174213	0.861698	0.89726
YPL178W	YPL178W	YPL178W	CDS	CBC2	2752.86	3607.11	-0.389852	0.0475703	-8.1953	2.49976e-16	1.00915e-15
tI%28UAU%29D	tI%28UAU%29D	tI%28UAU%29D	noncoding_exon	tI%28UAU%29D	0	0
tR%28CCG%29L	tR%28CCG%29L	tR%28CCG%29L	noncoding_exon	TRR4	2.53784	0.372564	2.80264	1.77325	1.58051	0.11399	0.157147
tR%28CCU%29J	tR%28CCU%29J	tR%28CCU%29J	noncoding_exon	HSX1	0	0.306789	-1.01256	4.40736	-0.229743	0.818291	0.864202
YNR075W	YNR075W	YNR075W	CDS	COS10	469.147	460.577	0.0242063	0.117366	0.206247	0.836598	0.877034
YOL046C	YOL046C	YOL046C	CDS	YOL046C	25.523	13.7057	0.905185	0.498991	1.81403	0.0696727	0.099428
tR%28UCU%29B	tR%28UCU%29B	tR%28UCU%29B	noncoding_exon	tR%28UCU%29B	0	0.306789	-1.01256	4.40736	-0.229743	0.818291	0.864202
YIL074C	YIL074C	YIL074C	CDS	SER33	1220.42	1452.39	-0.252391	0.0694649	-3.63337	0.000279747	0.000540158
YGL173C	YGL173C	YGL173C	CDS	XRN1	8607.22	9356.57	-0.120668	0.0378334	-3.18945	0.00142541	0.00255521
YHL008C	YHL008C	YHL008C	CDS	YHL008C	3780.68	2672.49	0.500741	0.0428192	11.6943	1.36269e-31	9.30305e-31
tR%28UCU%29D	tR%28UCU%29D	tR%28UCU%29D	noncoding_exon	tR%28UCU%29D	0	1.04577	-2.51945	3.33443	-0.755588	0.449896	0.53473
YNL249C	YNL249C	YNL249C	CDS	MPA43	348.99	348.378	0.00269717	0.108676	0.0248184	0.9802	0.988603
YGR056W	YGR056W	YGR056W	CDS	RSC1	1763.63	1759.87	0.00276091	0.0521733	0.0529181	0.957797	0.9744
YGL065C	YGL065C	YGL065C	CDS	ALG2	1006.74	1442.87	-0.518498	0.0594076	-8.72781	2.59657e-18	1.13624e-17
YOR052C	YOR052C	YOR052C	CDS	TMC1	5905.92	4651.04	0.344689	0.0495732	6.95313	3.57272e-12	1.16926e-11
YPL078C	YPL078C	YPL078C	CDS	ATP4	17240.9	27808.2	-0.68962	0.0442271	-15.5927	8.1626e-55	1.01981e-53
YGR116W	YGR116W	YGR116W	CDS	SPT6	5295.1	5501.48	-0.0555795	0.0568497	-0.977657	0.328244	0.40596
YOR343C	YOR343C	YOR343C	CDS	YOR343C	435.751	486.444	-0.158396	0.109238	-1.45	0.147058	0.198579
YGL230C	YGL230C	YGL230C	CDS	YGL230C	79.6062	48.3005	0.712774	0.255281	2.79212	0.00523641	0.00878268
YOL159C	YOL159C	YOL159C	CDS	YOL159C	1346.36	1101.32	0.289115	0.0616308	4.69107	2.71775e-06	6.19071e-06
tR%28UCU%29G1	tR%28UCU%29G1	tR%28UCU%29G1	noncoding_exon	tR%28UCU%29G1	0.36718	2.18932	-2.64564	2.30513	-1.14772	0.251085	0.320757
YBR129C	YBR129C	YBR129C	CDS	OPY1	987.982	1089.39	-0.143339	0.0753156	-1.90318	0.0570176	0.082685
YDR290W	YDR290W	YDR290W	CDS	YDR290W	0.335195	0	0.910977	4.40736	0.206695	0.836248	0.876801
YDR019C	YDR019C	YDR019C	CDS	GCV1	7596.36	9124.15	-0.264322	0.0377547	-7.00104	2.54077e-12	8.37966e-12
YBR150C	YBR150C	YBR150C	CDS	TBS1	2922.67	1773.7	0.720377	0.0461374	15.6137	5.87069e-55	7.36102e-54
YFL031C-A	YFL031C-A	YFL031C-A	CDS	YFL031C-A	3.93065	2.56189	0.578752	1.04949	0.551459	0.581319	0.663821
YER119C	YER119C	YER119C	CDS	AVT6	3953.86	3637.46	0.121311	0.0565687	2.14449	0.0319939	0.0480424
YMR196W	YMR196W	YMR196W	CDS	YMR196W	8565.31	8651.48	-0.0146687	0.0400834	-0.365956	0.714398	0.778371
tR%28UCU%29J2	tR%28UCU%29J2	tR%28UCU%29J2	noncoding_exon	tR%28UCU%29J2	0.626464	1.31076	-1.05542	2.82194	-0.374004	0.708401	0.773165
YDR499W	YDR499W	YDR499W	CDS	LCD1	920.539	1058.3	-0.200457	0.0753676	-2.65972	0.00782062	0.0127884
YKL068W-A	YKL068W-A	YKL068W-A	CDS	YKL068W-A	315.024	350.612	-0.155419	0.11581	-1.34202	0.179589	0.237412
YJL133C-A	YJL133C-A	YJL133C-A	CDS	YJL133C-A	7215.37	8379.79	-0.215642	0.0437973	-4.92363	8.49528e-07	2.0024e-06
YHL046W-A	YHL046W-A	YHL046W-A	CDS	YHL046W-A	1.97535	3.03588	-0.627819	1.28149	-0.489912	0.624196	0.701656
YMR322C	YMR322C	YMR322C	CDS	SNO4	88.433	53.8017	0.71222	0.278179	2.5603	0.0104583	0.0168607
tR%28UCU%29Q1	tR%28UCU%29Q1	tR%28UCU%29Q1	noncoding_exon	tR%28UCU%29Q1	2.63764	8.91456	-1.75573	1.22027	-1.43881	0.150205	0.202281
YLL061W	YLL061W	YLL061W	CDS	MMP1	834.21	553.846	0.590028	0.0946685	6.23257	4.58856e-10	1.32588e-09
YDR110W	YDR110W	YDR110W	CDS	FOB1	558.924	623.614	-0.156346	0.100096	-1.56196	0.118298	0.162605
YDR419W	YDR419W	YDR419W	CDS	RAD30	904.472	708.833	0.349199	0.0782776	4.46104	8.15632e-06	1.78962e-05
YOR221C	YOR221C	YOR221C	CDS	MCT1	2229.18	2451.25	-0.137265	0.0508103	-2.70153	0.0069022	0.0113771
YPL214C	YPL214C	YPL214C	CDS	THI6	1473.45	1736.61	-0.235774	0.0586355	-4.02102	5.79477e-05	0.000118509
YBL108C-A	YBL108C-A	YBL108C-A	CDS	PAU9	3.96264	3.49819	0.189407	1.08803	0.174082	0.861801	0.89726
YGL165C	YGL165C	YGL165C	CDS	YGL165C	52.0491	46.3091	0.154983	0.262221	0.591041	0.554493	0.638513
YOL064C	YOL064C	YOL064C	CDS	MET22	1124.85	1059.49	0.0872903	0.0725761	1.20274	0.229077	0.29567
YBL023C	YBL023C	YBL023C	CDS	MCM2	961.998	979.913	-0.023371	0.0790721	-0.295566	0.767562	0.823449
YOR274W	YOR274W	YOR274W	CDS	MOD5	1117.79	1114.58	0.00451391	0.0645705	0.0699066	0.944268	0.964006
YHR213W	YHR213W	YHR213W	CDS	YHR213W	0.335195	0	0.910995	3.67635	0.247799	0.80429	0.855109
YOR329C	YOR329C	YOR329C	CDS	SCD5	3584.22	3624.19	-0.0156097	0.0385065	-0.405379	0.685199	0.753933
YLR005W	YLR005W	YLR005W	CDS	SSL1	4201.6	2407.29	0.804015	0.0470833	17.0765	2.22227e-65	3.24016e-64
YDR124W	YDR124W	YDR124W	CDS	YDR124W	236.54	319.302	-0.438489	0.128953	-3.40039	0.000672905	0.00125055
YNL267W	YNL267W	YNL267W	CDS	PIK1	2680.84	3044.25	-0.183613	0.0446318	-4.11394	3.88965e-05	8.0729e-05
YBR134W	YBR134W	YBR134W	CDS	YBR134W	10.0639	5.34318	0.948972	0.711458	1.33384	0.182256	0.240664
YLL047W	YLL047W	YLL047W	CDS	YLL047W	51.7036	47.3352	0.133797	0.318883	0.419579	0.674793	0.744864
tS%28AGA%29A	tS%28AGA%29A	tS%28AGA%29A	noncoding_exon	tS%28AGA%29A	0.582537	1.33473	-1.13102	2.19166	-0.516056	0.605815	0.685184
YLR050C	YLR050C	YLR050C	CDS	YLR050C	1462.94	1014.13	0.527928	0.0664761	7.94162	1.99551e-15	7.68705e-15
YOR124C	YOR124C	YOR124C	CDS	UBP2	3178.37	3865.89	-0.283343	0.043017	-6.58677	4.49505e-11	1.3848e-10
YDR067C	YDR067C	YDR067C	CDS	OCA6	1038.63	1250.02	-0.266551	0.0848309	-3.14215	0.00167715	0.00298806
YOR296W	YOR296W	YOR296W	CDS	YOR296W	1080.43	975.574	0.146401	0.060827	2.40685	0.0160908	0.025299
YHR032W-A	YHR032W-A	YHR032W-A	CDS	YHR032W-A	336.705	207.964	0.697646	0.155464	4.48751	7.20588e-06	1.58907e-05
YJL044C	YJL044C	YJL044C	CDS	GYP6	2396.33	2579.99	-0.10755	0.0479508	-2.24293	0.0249011	0.0379797
YPR164W	YPR164W	YPR164W	CDS	MMS1	1091.73	1589.23	-0.539927	0.0758863	-7.11495	1.11956e-12	3.78278e-12
YNL104C	YNL104C	YNL104C	CDS	LEU4	36110.8	44296.1	-0.294728	0.0352295	-8.36595	5.96343e-17	2.47908e-16
YEL060C	YEL060C	YEL060C	CDS	PRB1	39543.2	32622.7	0.277619	0.0446901	6.21208	5.22885e-10	1.50281e-09
YDR532C	YDR532C	YDR532C	CDS	KRE28	1169.18	1508.07	-0.367038	0.0725025	-5.06242	4.13967e-07	1.00178e-06
YDR274C	YDR274C	YDR274C	CDS	YDR274C	16.6885	9.1021	0.861634	0.559977	1.5387	0.123878	0.169807
YLR101C	YLR101C	YLR101C	CDS	YLR101C	210.647	120.116	0.80485	0.163094	4.93488	8.01987e-07	1.8961e-06
tS%28AGA%29D1	tS%28AGA%29D1	tS%28AGA%29D1	noncoding_exon	tS%28AGA%29D1	0	1.05192	-2.51648	2.18583	-1.15127	0.249622	0.319063
YML026C	YML026C	YML026C	CDS	RPS18B	7572.99	4502.98	0.749992	0.0390434	19.2092	3.10105e-82	6.15277e-81
YPR066W	YPR066W	YPR066W	CDS	UBA3	435.651	484.903	-0.151997	0.100453	-1.51312	0.13025	0.177739
YDR229W	YDR229W	YDR229W	CDS	IVY1	1896.23	2841.27	-0.583904	0.0499778	-11.6833	1.55213e-31	1.05551e-30
YDL181W	YDL181W	YDL181W	CDS	INH1	6665.01	9531.44	-0.516085	0.0590815	-8.73514	2.43344e-18	1.0662e-17
tY%28GUA%29F2	tY%28GUA%29F2	tY%28GUA%29F2	noncoding_exon	SUP6	0	0
tY%28GUA%29F1	tY%28GUA%29F1	tY%28GUA%29F1	noncoding_exon	SUP11	0	0
YBR022W	YBR022W	YBR022W	CDS	POA1	500.693	493.959	0.0218069	0.098568	0.221237	0.824908	0.868972
YER177W	YER177W	YER177W	CDS	BMH1	23849.1	34562.7	-0.535164	0.0380163	-14.0772	5.2411e-45	5.12659e-44
YML048W	YML048W	YML048W	CDS	GSF2	6942.4	5433.7	0.353791	0.0407149	8.68947	3.64132e-18	1.58153e-17
YBL064C	YBL064C	YBL064C	CDS	PRX1	12738.8	18936.3	-0.571767	0.0290134	-19.707	1.87678e-86	3.99616e-85
YIL045W	YIL045W	YIL045W	CDS	PIG2	4504.45	6269.6	-0.478016	0.0391254	-12.2175	2.50557e-34	1.85961e-33
YKL221W	YKL221W	YKL221W	CDS	MCH2	166.217	162.185	0.0376421	0.156148	0.241067	0.809503	0.85944
YGL126W	YGL126W	YGL126W	CDS	SCS3	1833.66	1271.31	0.529316	0.0862546	6.13667	8.427e-10	2.39634e-09
tS%28AGA%29D2	tS%28AGA%29D2	tS%28AGA%29D2	noncoding_exon	tS%28AGA%29D2	2.72165	10.4823	-1.96436	0.905593	-2.16914	0.030072	0.0453809
YMR270C	YMR270C	YMR270C	CDS	RRN9	1340.6	1163.15	0.205787	0.0855155	2.40644	0.0161091	0.025322
YLR293C	YLR293C	YLR293C	CDS	GSP1	13943	9616.88	0.53588	0.0404806	13.2379	5.29783e-40	4.56227e-39
tS%28AGA%29G	tS%28AGA%29G	tS%28AGA%29G	noncoding_exon	tS%28AGA%29G	0	0.348589	-1.01256	4.40736	-0.229743	0.818291	0.864202
YJR053W	YJR053W	YJR053W	CDS	BFA1	272.319	283.801	-0.0569276	0.12506	-0.455201	0.648965	0.724017
YJL171C	YJL171C	YJL171C	CDS	YJL171C	6419.9	4479.29	0.519197	0.0363521	14.2825	2.81446e-46	2.86952e-45
tS%28AGA%29H	tS%28AGA%29H	tS%28AGA%29H	noncoding_exon	tS%28AGA%29H	1.28491	3.01805	-1.2245	1.49232	-0.820535	0.411911	0.49557
YIR002C	YIR002C	YIR002C	CDS	MPH1	2827.06	2538.87	0.154129	0.0688575	2.23837	0.0251969	0.0383639
YDL167C	YDL167C	YDL167C	CDS	NRP1	702.917	1021.95	-0.540455	0.0746813	-7.23682	4.59315e-13	1.58413e-12
tS%28AGA%29J	tS%28AGA%29J	tS%28AGA%29J	noncoding_exon	tS%28AGA%29J	6.93119	3.39061	1.04735	0.850768	1.23106	0.2183	0.282702
YLR373C	YLR373C	YLR373C	CDS	VID22	2892.97	1609.01	0.845965	0.0490623	17.2427	1.27073e-66	1.90855e-65
YJR035W	YJR035W	YJR035W	CDS	RAD26	2123.78	2118.62	0.00166114	0.0608572	0.0272956	0.978224	0.987699
YKR054C	YKR054C	YKR054C	CDS	DYN1	2931.72	3031.02	-0.048509	0.0509041	-0.95295	0.340615	0.418832
YIR034C	YIR034C	YIR034C	CDS	LYS1	3733.33	2733.05	0.451098	0.0489901	9.20794	3.32443e-20	1.5816e-19
YGL013C	YGL013C	YGL013C	CDS	PDR1	2424.65	1852.35	0.388889	0.047991	8.10337	5.34565e-16	2.12729e-15
YMR070W	YMR070W	YMR070W	CDS	MOT3	4164.35	2533.2	0.717281	0.0642948	11.1561	6.68441e-29	4.24013e-28
YGR207C	YGR207C	YGR207C	CDS	CIR1	2484.33	3787.22	-0.608139	0.0500218	-12.1575	5.2359e-34	3.82106e-33
YDR212W	YDR212W	YDR212W	CDS	TCP1	3111.08	4316.79	-0.471928	0.0511501	-9.22634	2.80038e-20	1.33775e-19
YLR456W	YLR456W	YLR456W	CDS	YLR456W	855.037	706.382	0.274719	0.0774171	3.54856	0.000387342	0.000738318
tS%28AGA%29L	tS%28AGA%29L	tS%28AGA%29L	noncoding_exon	tS%28AGA%29L	0	0.348589	-1.01256	4.40736	-0.229743	0.818291	0.864202
YDR514C	YDR514C	YDR514C	CDS	YDR514C	444.067	504.128	-0.183296	0.099829	-1.8361	0.0663425	0.0951018
YNL025C	YNL025C	YNL025C	CDS	SSN8	1167.64	975.454	0.259947	0.063515	4.09269	4.26405e-05	8.82897e-05
YGR121W-A	YGR121W-A	YGR121W-A	CDS	YGR121W-A	35.6671	24.6152	0.544125	0.346281	1.57134	0.116103	0.159808
YGR091W	YGR091W	YGR091W	CDS	PRP31	612.004	761.968	-0.317051	0.084681	-3.74406	0.000181069	0.000355721
YDL232W	YDL232W	YDL232W	CDS	OST4	479.982	566	-0.237809	0.0955938	-2.4877	0.0128571	0.0205102
YPL119C	YPL119C	YPL119C	CDS	DBP1	2385.64	2391.75	-0.00334192	0.0497355	-0.0671937	0.946428	0.965505
YLR242C	YLR242C	YLR242C	CDS	ARV1	706.821	491.078	0.527284	0.0866933	6.08217	1.18565e-09	3.34697e-09
YMR031W-A	YMR031W-A	YMR031W-A	CDS	YMR031W-A	13.7195	7.14764	0.931742	0.598635	1.55644	0.119603	0.164236
YJR148W	YJR148W	YJR148W	CDS	BAT2	23935.3	18016.3	0.410018	0.044487	9.21659	3.06709e-20	1.46116e-19
tS%28UGA%29I	tS%28UGA%29I	tS%28UGA%29I	noncoding_exon	SUP17	2.34253	0	3.63248	2.70507	1.34284	0.179323	0.237195
YMR195W	YMR195W	YMR195W	CDS	ICY1	2611.05	1985.13	0.395875	0.0722587	5.47858	4.28759e-08	1.10906e-07
YOL087C	YOL087C	YOL087C	CDS	DUF1	4011.94	4160.92	-0.0527301	0.0455538	-1.15753	0.247054	0.31607
YNL134C	YNL134C	YNL134C	CDS	YNL134C	11102.3	21447.7	-0.949871	0.031204	-30.4407	1.5914e-203	1.42491e-201
YAL037W	YAL037W	YAL037W	CDS	YAL037W	213.925	123.424	0.794686	0.181524	4.37786	1.19848e-05	2.58978e-05
YGL146C	YGL146C	YGL146C	CDS	RRT6	1413.98	1693.46	-0.260193	0.0576346	-4.51452	6.34593e-06	1.40743e-05
YCR051W	YCR051W	YCR051W	CDS	YCR051W	2446.52	2356.14	0.0548815	0.0623152	0.880709	0.378476	0.45969
YBR262C	YBR262C	YBR262C	CDS	MIC12	1960.92	3479.4	-0.82702	0.0534673	-15.4678	5.72506e-54	6.97797e-53
YPL199C	YPL199C	YPL199C	CDS	YPL199C	1559.35	1891.48	-0.27702	0.057384	-4.82748	1.38271e-06	3.21358e-06
tT%28AGU%29D	tT%28AGU%29D	tT%28AGU%29D	noncoding_exon	tT%28AGU%29D	0.335195	1.40051	-1.97729	2.95599	-0.668909	0.503553	0.588195
YFL036W	YFL036W	YFL036W	CDS	RPO41	4475.79	5024.32	-0.167014	0.0487254	-3.42765	0.000608826	0.00113721
YJR133W	YJR133W	YJR133W	CDS	XPT1	1568.95	2346.23	-0.579308	0.0487847	-11.8748	1.60014e-32	1.11866e-31
YIL051C	YIL051C	YIL051C	CDS	MMF1	14180.5	22153.9	-0.64348	0.0396389	-16.2335	2.92127e-59	3.95391e-58
YPL057C	YPL057C	YPL057C	CDS	SUR1	6943.54	5073.52	0.452263	0.0570403	7.92884	2.2121e-15	8.49798e-15
YNR010W	YNR010W	YNR010W	CDS	CSE2	715.405	563.876	0.344624	0.0914436	3.76871	0.000164094	0.00032319
YDR365C	YDR365C	YDR365C	CDS	ESF1	1807.93	2727.03	-0.59287	0.0663503	-8.93545	4.05514e-19	1.83784e-18
tT%28AGU%29H	tT%28AGU%29H	tT%28AGU%29H	noncoding_exon	tT%28AGU%29H	0.582537	0	1.64929	4.38201	0.376378	0.706636	0.771842
YNL169C	YNL169C	YNL169C	CDS	PSD1	1800.87	2487.48	-0.465424	0.0560456	-8.30438	1.00343e-16	4.13207e-16
YFR034C	YFR034C	YFR034C	CDS	PHO4	2383.65	2167.7	0.137955	0.0733518	1.88073	0.0600085	0.0866982
YHR070W	YHR070W	YHR070W	CDS	TRM5	1162.1	1450.58	-0.318458	0.0735504	-4.3298	1.49245e-05	3.1987e-05
YDR460W	YDR460W	YDR460W	CDS	TFB3	1382.98	1374.35	0.00956057	0.0616895	0.154979	0.876838	0.909391
YNL112W	YNL112W	YNL112W	CDS	DBP2	1466.13	2124.61	-0.534847	0.0557813	-9.5883	8.95488e-22	4.52212e-21
YHL047C	YHL047C	YHL047C	CDS	ARN2	3247.48	2432.47	0.417297	0.0571147	7.30629	2.74627e-13	9.60437e-13
YOR360C	YOR360C	YOR360C	CDS	PDE2	1200	955.77	0.330548	0.066844	4.94506	7.61207e-07	1.80274e-06
YOR335C	YOR335C	YOR335C	CDS	ALA1	5058.28	5300.54	-0.0671355	0.0434426	-1.54538	0.122254	0.167646
YDR354C-A	YDR354C-A	YDR354C-A	CDS	YDR354C-A	3.48799	2.23112	0.596936	1.40395	0.425183	0.670703	0.742109
YKL100W-A	YKL100W-A	YKL100W-A	CDS	YKL100W-A	2.35447	1.37653	0.771167	1.68611	0.457366	0.647408	0.722746
tN%28GUU%29N2	tN%28GUU%29N2	tN%28GUU%29N2	noncoding_exon	tN%28GUU%29N2	0.36718	0.613578	-0.844238	2.59095	-0.325841	0.744544	0.804667
tN%28GUU%29N1	tN%28GUU%29N1	tN%28GUU%29N1	noncoding_exon	tN%28GUU%29N1	1.60817	2.72909	-0.756293	1.72212	-0.439163	0.660544	0.733191
YGL251C	YGL251C	YGL251C	CDS	HFM1	603.152	568.352	0.0876005	0.0889804	0.984492	0.324874	0.402433
YER156C	YER156C	YER156C	CDS	YER156C	1532.74	2048.54	-0.420068	0.0676131	-6.21282	5.20412e-10	1.49632e-09
YPL255W	YPL255W	YPL255W	CDS	BBP1	470.438	810.071	-0.78249	0.0896761	-8.72574	2.64446e-18	1.15647e-17
YOR095C	YOR095C	YOR095C	CDS	RKI1	2017.46	2754.92	-0.449996	0.0538844	-8.35114	6.76089e-17	2.80226e-16
YEL038W	YEL038W	YEL038W	CDS	UTR4	2128.04	1560.2	0.447732	0.0725728	6.16942	6.85408e-10	1.96023e-09
YCL014W	YCL014W	YCL014W	CDS	BUD3	1714.82	1646.31	0.0590937	0.0552406	1.06975	0.284731	0.35817
YOL025W	YOL025W	YOL025W	CDS	LAG2	1392.51	1474.33	-0.0838816	0.0616688	-1.36019	0.173768	0.230634
YPL208W	YPL208W	YPL208W	CDS	RKM1	614.426	639.362	-0.0605354	0.0946913	-0.639291	0.522633	0.606929
YOL147C	YOL147C	YOL147C	CDS	PEX11	1600.51	2182.32	-0.447818	0.0533681	-8.39112	4.81543e-17	2.01142e-16
YNL280C	YNL280C	YNL280C	CDS	ERG24	1921.78	3153.11	-0.714291	0.0650038	-10.9885	4.34287e-28	2.69127e-27
tT%28AGU%29J	tT%28AGU%29J	tT%28AGU%29J	noncoding_exon	tT%28AGU%29J	0.670391	0	1.82852	4.36648	0.418764	0.675389	0.745168
YIL160C	YIL160C	YIL160C	CDS	POT1	2464.42	2220.74	0.150444	0.0455386	3.30366	0.000954332	0.00174524
YPR089W	YPR089W	YPR089W	CDS	YPR089W	1653.58	2038.21	-0.303171	0.0529419	-5.7265	1.02527e-08	2.75296e-08
YBR233W	YBR233W	YBR233W	CDS	PBP2	621.292	724.002	-0.220293	0.0815229	-2.70222	0.00688774	0.0113613
YPL122C	YPL122C	YPL122C	CDS	TFB2	853.597	916.23	-0.102677	0.0661112	-1.5531	0.1204	0.165168
YKL104C	YKL104C	YKL104C	CDS	GFA1	7472.22	5144.34	0.538773	0.0417935	12.8913	5.03729e-38	4.14375e-37
YMR313C	YMR313C	YMR313C	CDS	TGL3	2611.84	1761.13	0.566988	0.0604726	9.37595	6.85535e-21	3.35749e-20
tA%28UGC%29L	tA%28UGC%29L	tA%28UGC%29L	noncoding_exon	tA%28UGC%29L	0.582537	1.11769	-0.898055	3.63849	-0.246821	0.805047	0.855667
YGL179C	YGL179C	YGL179C	CDS	TOS3	695.776	505.948	0.458414	0.0921078	4.97693	6.46014e-07	1.53933e-06
YGR120C	YGR120C	YGR120C	CDS	COG2	530.244	698.647	-0.399891	0.0868246	-4.60573	4.11012e-06	9.24777e-06
YML001W	YML001W	YML001W	CDS	YPT7	2625.95	3181.88	-0.27748	0.0508794	-5.45369	4.93365e-08	1.2724e-07
tT%28AGU%29N1	tT%28AGU%29N1	tT%28AGU%29N1	noncoding_exon	tT%28AGU%29N1	1.91138	4.96447	-1.34571	1.21339	-1.10905	0.26741	0.339007
YER016W	YER016W	YER016W	CDS	BIM1	1013.9	1334.27	-0.39586	0.0624387	-6.33998	2.29789e-10	6.74305e-10
YDR438W	YDR438W	YDR438W	CDS	THI74	672.887	556.501	0.274702	0.0878058	3.12852	0.00175688	0.00311661
YNL211C	YNL211C	YNL211C	CDS	YNL211C	441.966	515.489	-0.223738	0.0913706	-2.44868	0.0143379	0.0227015
YLR124W	YLR124W	YLR124W	CDS	YLR124W	52.1804	26.4615	0.982561	0.342942	2.86509	0.00416884	0.0070668
YML058W-A	YML058W-A	YML058W-A	CDS	HUG1	328.647	192.633	0.767645	0.149663	5.12916	2.91045e-07	7.11714e-07
tT%28AGU%29O2	tT%28AGU%29O2	tT%28AGU%29O2	noncoding_exon	tT%28AGU%29O2	1.36082	0.348589	1.8816	2.63995	0.71274	0.476006	0.560457
YJR065C	YJR065C	YJR065C	CDS	ARP3	8090.02	9011.81	-0.155448	0.0363073	-4.28146	1.85668e-05	3.94735e-05
YHR094C	YHR094C	YHR094C	CDS	HXT1	530.773	335.458	0.66281	0.118705	5.58368	2.35489e-08	6.16899e-08
YMR095C	YMR095C	YMR095C	CDS	SNO1	1064.75	821.517	0.374604	0.0817978	4.57964	4.65785e-06	1.04465e-05
YER138C	YER138C	YER138C	CDS	YER138C	112.815	147.941	-0.38643	0.17974	-2.14994	0.0315602	0.0474319
YDL033C	YDL033C	YDL033C	CDS	SLM3	934.698	1129.1	-0.271935	0.0674683	-4.03056	5.56452e-05	0.000113967
YMR255W	YMR255W	YMR255W	CDS	GFD1	5736.77	4758.14	0.269382	0.0564638	4.77088	1.83421e-06	4.23336e-06
YHR209W	YHR209W	YHR209W	CDS	CRG1	4272.16	3960.13	0.108901	0.0484268	2.24877	0.0245273	0.0374504
YGL247W	YGL247W	YGL247W	CDS	BRR6	486.472	508.708	-0.0625878	0.0957082	-0.653944	0.513148	0.598001
tT%28UAG%29Q2	tT%28UAG%29Q2	tT%28UAG%29Q2	noncoding_exon	tT%28UAG%29Q2	2.01927	0.655378	1.59364	2.12732	0.749131	0.453778	0.538428
YDR516C	YDR516C	YDR516C	CDS	EMI2	11990.4	10634.3	0.173258	0.0517842	3.34577	0.000820557	0.0015085
Q0130	Q0130	Q0130	CDS	OLI1	2106.24	3586.84	-0.767975	0.148509	-5.17123	2.32557e-07	5.72498e-07
YPL233W	YPL233W	YPL233W	CDS	NSL1	628.528	727.531	-0.207717	0.0846113	-2.45496	0.0140901	0.0223496
YOR255W	YOR255W	YOR255W	CDS	OSW1	51.0374	28.2825	0.863477	0.386018	2.23688	0.0252941	0.0385035
YOR063W	YOR063W	YOR063W	CDS	RPL3	33346.6	23726	0.491102	0.0331596	14.8102	1.25794e-49	1.40343e-48
YOR200W	YOR200W	YOR200W	CDS	YOR200W	4.91619	3.21726	0.582053	1.0222	0.569412	0.569076	0.652616
YGR251W	YGR251W	YGR251W	CDS	NOP19	473.744	801.705	-0.761418	0.0898578	-8.47359	2.37954e-17	1.00841e-16
YPR047W	YPR047W	YPR047W	CDS	MSF1	1197.98	1492.09	-0.316536	0.0706572	-4.47988	7.46836e-06	1.64384e-05
YDR246W-A	YDR246W-A	YDR246W-A	CDS	YDR246W-A	78.6894	39.7086	0.974315	0.244034	3.99254	6.53681e-05	0.000133099
YDR044W	YDR044W	YDR044W	CDS	HEM13	1607.87	2422.78	-0.590949	0.0571063	-10.3482	4.26339e-25	2.42472e-24
YDR188W	YDR188W	YDR188W	CDS	CCT6	4902.93	5167.53	-0.0755003	0.0534947	-1.41136	0.158138	0.211902
YEL016C	YEL016C	YEL016C	CDS	NPP2	935.002	1047.14	-0.161997	0.0708406	-2.28678	0.0222084	0.0341112
YAL027W	YAL027W	YAL027W	CDS	SAW1	1696.28	1099.46	0.626135	0.0579987	10.7957	3.60802e-27	2.17603e-26
tT%28UGU%29H	tT%28UGU%29H	tT%28UGU%29H	noncoding_exon	tT%28UGU%29H	1.62011	0.372564	2.14429	2.78598	0.769671	0.441495	0.526537
tT%28UGU%29Q1	tT%28UGU%29Q1	tT%28UGU%29Q1	noncoding_exon	tT%28UGU%29Q1	4.27779	18.4433	-2.10838	0.684576	-3.07984	0.00207114	0.00364721
tV%28AAC%29E1	tV%28AAC%29E1	tV%28AAC%29E1	noncoding_exon	tV%28AAC%29E1	0	0.306789	-1.01256	4.40736	-0.229743	0.818291	0.864202
YFL019C	YFL019C	YFL019C	CDS	YFL019C	45.4394	38.4974	0.244588	0.303037	0.807122	0.419596	0.503862
YMR139W	YMR139W	YMR139W	CDS	RIM11	5220.24	4863.69	0.102442	0.0373961	2.73939	0.00615542	0.0102234
YDL080C	YDL080C	YDL080C	CDS	THI3	1105.42	1304.38	-0.238814	0.0583901	-4.08997	4.3142e-05	8.92753e-05
YOR172W	YOR172W	YOR172W	CDS	YRM1	1586.06	1429.91	0.149026	0.0548865	2.71516	0.0066243	0.0109423
YOR105W	YOR105W	YOR105W	CDS	YOR105W	87.7721	64.439	0.430977	0.231312	1.86318	0.0624364	0.0899826
YJL138C	YJL138C	YJL138C	CDS	TIF2	5008.66	6426	-0.359132	0.0360549	-9.96069	2.26483e-23	1.2051e-22
YPR143W	YPR143W	YPR143W	CDS	RRP15	3047.43	3733.53	-0.293524	0.0727701	-4.03358	5.49341e-05	0.000112708
YDR340W	YDR340W	YDR340W	CDS	YDR340W	4.47354	6.70931	-0.611706	0.941616	-0.649634	0.515929	0.600665
YNL322C	YNL322C	YNL322C	CDS	KRE1	15665.8	12446.3	0.332164	0.0455298	7.29552	2.975e-13	1.03731e-12
YPL090C	YPL090C	YPL090C	CDS	RPS6A	5236.77	4334.46	0.272562	0.0626238	4.35237	1.34676e-05	2.89765e-05
YPR078C	YPR078C	YPR078C	CDS	YPR078C	49.518	42.3305	0.227883	1.00439	0.226888	0.820511	0.865757
YBL058W	YBL058W	YBL058W	CDS	SHP1	6837.2	6127.17	0.15875	0.0349089	4.54756	5.42707e-06	1.21017e-05
YFL062W	YFL062W	YFL062W	CDS	COS4	100.821	108.64	-0.109214	0.214027	-0.510282	0.609854	0.688642
YNL197C	YNL197C	YNL197C	CDS	WHI3	1822.63	1649.2	0.144316	0.0579532	2.49022	0.0127663	0.02037
YLR439W	YLR439W	YLR439W	CDS	MRPL4	4026.76	4478.8	-0.152713	0.0548445	-2.78448	0.00536138	0.0089772
YCR020C	YCR020C	YCR020C	CDS	PET18	428.764	439.028	-0.0380302	0.11666	-0.325993	0.74443	0.804667
YCL051W	YCL051W	YCL051W	CDS	LRE1	1809.11	1518.05	0.252243	0.0508078	4.96465	6.88253e-07	1.63606e-06
YCR097W	YCR097W	YCR097W	CDS	HMRA1	5245.83	6610.54	-0.333624	0.130136	-2.56366	0.0103575	0.0167059
YBL039C-A	YBL039C-A	YBL039C-A	CDS	YBL039C-A	0.993644	1.02794	-0.0508452	1.647	-0.0308714	0.975372	0.986457
YDR235W	YDR235W	YDR235W	CDS	PRP42	883.444	818.833	0.107779	0.0775482	1.38983	0.164579	0.219733
YGL194C-A	YGL194C-A	YGL194C-A	CDS	YGL194C-A	272.626	236.704	0.198758	0.134387	1.47899	0.139142	0.18895
YER038C	YER038C	YER038C	CDS	KRE29	416.76	432.831	-0.0524237	0.117355	-0.446711	0.655084	0.728835
YPR125W	YPR125W	YPR125W	CDS	YLH47	1222.67	1475.91	-0.271488	0.0639782	-4.24345	2.20107e-05	4.64987e-05
tV%28AAC%29G1	tV%28AAC%29G1	tV%28AAC%29G1	noncoding_exon	tV%28AAC%29G1	0.702376	2.18743	-1.65999	2.01955	-0.821964	0.411097	0.494698
YHR049W	YHR049W	YHR049W	CDS	FSH1	2298.48	3013.68	-0.390569	0.0479062	-8.15278	3.5565e-16	1.4275e-15
YBR007C	YBR007C	YBR007C	CDS	DSF2	1345.94	734.026	0.875267	0.084789	10.3229	5.55236e-25	3.14499e-24
YPL001W	YPL001W	YPL001W	CDS	HAT1	387.334	296.023	0.387666	0.119665	3.2396	0.00119696	0.00216289
YJL038C	YJL038C	YJL038C	CDS	LOH1	51.153	63.5155	-0.305622	0.32644	-0.936228	0.349156	0.427883
YOR158W	YOR158W	YOR158W	CDS	PET123	2124.38	3468.46	-0.706742	0.0497739	-14.1991	9.28541e-46	9.34428e-45
YPR178W	YPR178W	YPR178W	CDS	PRP4	1232.89	1287.99	-0.0641907	0.0720149	-0.891354	0.372739	0.4536
YER079C-A	YER079C-A	YER079C-A	CDS	YER079C-A	2.74553	3.45639	-0.346395	1.16179	-0.298156	0.765584	0.821832
TLC1	TLC1	TLC1	noncoding_exon	TLC1	6445.19	3778.37	0.770282	0.063152	12.1973	3.21427e-34	2.37802e-33
YNL159C	YNL159C	YNL159C	CDS	ASI2	1951.97	1735	0.171981	0.0588923	2.92027	0.0034973	0.00598363
YAL014C	YAL014C	YAL014C	CDS	SYN8	3249.63	1671.35	0.961262	0.0533158	18.0296	1.14109e-72	1.92032e-71
YCR020W-B	YCR020W-B	YCR020W-B	CDS	HTL1	191.446	268.21	-0.487491	0.133987	-3.63836	0.000274383	0.000530681
YBR243C	YBR243C	YBR243C	CDS	ALG7	1218.34	1056.45	0.205774	0.0804168	2.55885	0.010502	0.0169234
YLR181C	YLR181C	YLR181C	CDS	VTA1	2359.85	1773.97	0.412276	0.0516333	7.98468	1.40884e-15	5.47543e-15
YCR073C	YCR073C	YCR073C	CDS	SSK22	2395.46	1216.82	0.978085	0.0668084	14.6402	1.55719e-48	1.68611e-47
YNL075W	YNL075W	YNL075W	CDS	IMP4	734.988	884.028	-0.265718	0.0825487	-3.21893	0.00128671	0.00231612
tV%28AAC%29G2	tV%28AAC%29G2	tV%28AAC%29G2	noncoding_exon	tV%28AAC%29G2	0.961659	0.306789	1.39572	3.08601	0.452273	0.651073	0.725793
tV%28AAC%29J	tV%28AAC%29J	tV%28AAC%29J	noncoding_exon	tV%28AAC%29J	0.670391	0	1.82852	4.36648	0.418764	0.675389	0.745168
YPL150W	YPL150W	YPL150W	CDS	YPL150W	2285.2	2101.93	0.120438	0.0486097	2.47766	0.0132247	0.0210582
YJL012C	YJL012C	YJL012C	CDS	VTC4	4634.71	5984.99	-0.369417	0.056824	-6.50107	7.97524e-11	2.41017e-10
YJL065C	YJL065C	YJL065C	CDS	DLS1	1530.7	1615.22	-0.0771575	0.0741692	-1.04029	0.298205	0.373438
YKR020W	YKR020W	YKR020W	CDS	VPS51	746.15	910.2	-0.288035	0.0792114	-3.63629	0.000276596	0.000534665
YMR053C	YMR053C	YMR053C	CDS	STB2	1561.54	1186.58	0.394974	0.0606815	6.50897	7.56684e-11	2.29171e-10
YKL066W	YKL066W	YKL066W	CDS	YKL066W	4231.18	7765.16	-0.875947	0.110767	-7.90805	2.61448e-15	9.98881e-15
YMR004W	YMR004W	YMR004W	CDS	MVP1	3208.11	2392.16	0.424274	0.0481719	8.80749	1.27978e-18	5.67852e-18
YER083C	YER083C	YER083C	CDS	GET2	3211.37	2920.14	0.138111	0.0569504	2.4251	0.0153041	0.0241381
YPL176C	YPL176C	YPL176C	CDS	TRE1	3703.2	3566.94	0.0541802	0.0503336	1.07642	0.281739	0.354982
YHR172W	YHR172W	YHR172W	CDS	SPC97	368.186	590.544	-0.681376	0.110783	-6.15056	7.72087e-10	2.20002e-09
YKL091C	YKL091C	YKL091C	CDS	YKL091C	3014.88	3260.01	-0.112807	0.0406557	-2.77468	0.00552558	0.00923442
YDL240W	YDL240W	YDL240W	CDS	LRG1	592.16	636.435	-0.107764	0.0834574	-1.29125	0.196617	0.257486
YDR401W	YDR401W	YDR401W	CDS	YDR401W	101.888	77.8507	0.39212	0.19177	2.04475	0.0408799	0.0604628
YFR013W	YFR013W	YFR013W	CDS	IOC3	1943.5	2053.72	-0.0795312	0.0591662	-1.3442	0.178884	0.236704
YHR013C	YHR013C	YHR013C	CDS	ARD1	1122.97	1610.94	-0.523217	0.0639544	-8.18109	2.81295e-16	1.13297e-15
YOL040C	YOL040C	YOL040C	CDS	RPS15	14315.4	10016.4	0.515477	0.0534314	9.64744	5.03962e-22	2.57098e-21
tV%28UAC%29Q	tV%28UAC%29Q	tV%28UAC%29Q	noncoding_exon	tV%28UAC%29Q	0.949717	0.372564	1.37682	3.59793	0.382669	0.701965	0.767939
YCL035C	YCL035C	YCL035C	CDS	GRX1	13659.1	18153.7	-0.41061	0.0335301	-12.246	1.7649e-34	1.31971e-33
tW%28CCA%29P	tW%28CCA%29P	tW%28CCA%29P	noncoding_exon	tW%28CCA%29P	1.46872	0	2.95342	4.25942	0.693387	0.488067	0.572403
YNR073C	YNR073C	YNR073C	CDS	YNR073C	2246.55	2799.19	-0.317315	0.0579616	-5.47457	4.38576e-08	1.13319e-07
YPR200C	YPR200C	YPR200C	CDS	ARR2	89.4041	95.1234	-0.0947199	0.208472	-0.454354	0.649574	0.724354
YIL072W	YIL072W	YIL072W	CDS	HOP1	566.64	465.51	0.283759	0.0884085	3.20964	0.00132903	0.00238795
tW%28UCA%29Q	tW%28UCA%29Q	tW%28UCA%29Q	noncoding_exon	tW%28UCA%29Q	0	1.68332	-3.21317	2.22706	-1.44279	0.149081	0.200923
YBR229C	YBR229C	YBR229C	CDS	ROT2	1621.43	2440.22	-0.589331	0.051532	-11.4362	2.75704e-30	1.8063e-29
YMR100W	YMR100W	YMR100W	CDS	MUB1	2917.25	2349.69	0.311785	0.0625383	4.98551	6.17995e-07	1.47457e-06
YML133C	YML133C	YML133C	CDS	YML133C	78.8702	69.9911	0.164248	0.246776	0.665572	0.505684	0.590518
YOR131C	YOR131C	YOR131C	CDS	YOR131C	1692.25	1826.05	-0.110038	0.0705229	-1.56032	0.118684	0.163071
tX%28XXX%29D	tX%28XXX%29D	tX%28XXX%29D	noncoding_exon	tX%28XXX%29D	0.702376	2.2969	-1.79394	1.51838	-1.18148	0.237412	0.305252
YNL247W	YNL247W	YNL247W	CDS	YNL247W	3103.4	4004.46	-0.366916	0.055224	-6.64413	3.05011e-11	9.46754e-11
YOR054C	YOR054C	YOR054C	CDS	VHS3	4355.31	3992.73	0.12552	0.0452649	2.77301	0.00555401	0.00927915
YGL007C-A	YGL007C-A	YGL007C-A	CDS	YGL007C-A	95.2581	51.9154	0.874294	0.217368	4.02219	5.76593e-05	0.000117953
YOR121C	YOR121C	YOR121C	CDS	YOR121C	41.8239	45.9561	-0.12651	0.30434	-0.415685	0.677641	0.747063
YFR028C	YFR028C	YFR028C	CDS	CDC14	1099.22	1752.95	-0.671152	0.0720337	-9.3172	1.19452e-20	5.76938e-20
YOR009W	YOR009W	YOR009W	CDS	TIR4	826.507	530.109	0.640723	0.0970893	6.59932	4.1304e-11	1.2764e-10
tX%28XXX%29L	tX%28XXX%29L	tX%28XXX%29L	noncoding_exon	tX%28XXX%29L	4.51746	0	4.58157	4.26499	1.07423	0.282721	0.356079
YDR292C	YDR292C	YDR292C	CDS	SRP101	2167.17	2667.04	-0.30007	0.047091	-6.37212	1.86433e-10	5.51015e-10
YOR161C-C	YOR161C-C	YOR161C-C	CDS	YOR161C-C	11.3293	7.80302	0.527206	0.599543	0.879346	0.379214	0.460276
YAL016C-A	YAL016C-A	YAL016C-A	CDS	YAL016C-A	63.1826	24.6786	1.342	0.264253	5.07846	3.80509e-07	9.24338e-07
YHR126C	YHR126C	YHR126C	CDS	ANS1	9.86097	6.41481	0.608807	0.914769	0.66553	0.505711	0.590518
YAL020C	YAL020C	YAL020C	CDS	ATS1	3935.36	1444.23	1.448	0.0710054	20.3929	1.93444e-92	4.50338e-91
YMR194W	YMR194W	YMR194W	CDS	RPL36A	3534.9	2343.11	0.5933	0.0603127	9.83706	7.79557e-23	4.05393e-22
YEL063C	YEL063C	YEL063C	CDS	CAN1	3647.81	3859.98	-0.0820634	0.0561161	-1.46238	0.143636	0.194372
tD%28GUC%29M	tD%28GUC%29M	tD%28GUC%29M	noncoding_exon	tD%28GUC%29M	1.80392	2.42845	-0.456522	1.73948	-0.262448	0.792976	0.845776
YAL023C	YAL023C	YAL023C	CDS	PMT2	10355.4	4428.97	1.22617	0.0498079	24.6181	8.08953e-134	3.34303e-132
YOR249C	YOR249C	YOR249C	CDS	APC5	955.175	1220.06	-0.354356	0.0606713	-5.84059	5.20164e-09	1.41852e-08
YAL024C	YAL024C	YAL024C	CDS	LTE1	1267.53	573.594	1.14105	0.0855229	13.3421	1.31715e-40	1.147e-39
YAL026C-A	YAL026C-A	YAL026C-A	CDS	YAL026C-A	281.974	108.898	1.36555	0.2156	6.33369	2.39359e-10	7.0121e-10
YER117W	YER117W	YER117W	CDS	RPL23B	7516.29	5285.56	0.508424	0.0394469	12.8888	5.20198e-38	4.27419e-37
YAL028W	YAL028W	YAL028W	CDS	FRT2	2784.22	1039.74	1.422	0.0571913	24.8639	1.82839e-136	7.78627e-135
YOR301W	YOR301W	YOR301W	CDS	RAX1	482.949	513.987	-0.0865314	0.101849	-0.849604	0.395545	0.478022
YAL031C	YAL031C	YAL031C	CDS	GIP4	3640.88	1714.82	1.08742	0.0480759	22.6188	2.83042e-113	9.19426e-112
YKL218C	YKL218C	YKL218C	CDS	SRY1	3382.26	1890.01	0.839648	0.0462775	18.1438	1.43836e-73	2.44416e-72
YBL107C	YBL107C	YBL107C	CDS	MIX23	1246.62	1554.23	-0.317382	0.0561449	-5.65291	1.57754e-08	4.16858e-08
YDR391C	YDR391C	YDR391C	CDS	YDR391C	3087.31	2873.63	0.104385	0.048092	2.17052	0.0299675	0.0452427
YLL063C	YLL063C	YLL063C	CDS	AYT1	335.777	293.122	0.195144	0.105947	1.84191	0.0654881	0.0939928
YAL031W-A	YAL031W-A	YAL031W-A	CDS	YAL031W-A	12.5263	5.23499	1.26773	0.867656	1.4611	0.143988	0.194811
YOR276W	YOR276W	YOR276W	CDS	CAF20	1821.12	1926.62	-0.0806782	0.0614588	-1.31272	0.189277	0.2489
YMR309C	YMR309C	YMR309C	CDS	NIP1	4096.05	5333.58	-0.381148	0.0481331	-7.91863	2.40144e-15	9.21014e-15
YOR089C	YOR089C	YOR089C	CDS	VPS21	7009.54	5749.84	0.285722	0.0577085	4.95113	7.37849e-07	1.74979e-06
YGR258C	YGR258C	YGR258C	CDS	RAD2	3089	2908.96	0.0858438	0.0458893	1.87067	0.061391	0.0885125
YNL146C-A	YNL146C-A	YNL146C-A	CDS	YNL146C-A	75.3447	127.456	-0.759717	0.169319	-4.48689	7.22714e-06	1.59275e-05
YMR180C	YMR180C	YMR180C	CDS	CTL1	2996.41	2263.56	0.405678	0.0513607	7.8986	2.82052e-15	1.07642e-14
YGL163C	YGL163C	YGL163C	CDS	RAD54	4055.27	2472.59	0.713836	0.0538526	13.2554	4.20097e-40	3.62217e-39
YDR417C	YDR417C	YDR417C	CDS	YDR417C	16.4002	12.3391	0.402472	0.542455	0.741945	0.458121	0.542722
YAL032C	YAL032C	YAL032C	CDS	PRP45	2327.17	1143.05	1.02681	0.0652608	15.7339	8.85799e-56	1.12891e-54
YOR011W-A	YOR011W-A	YOR011W-A	CDS	YOR011W-A	0.335195	0	0.910987	4.40736	0.206697	0.836247	0.876801
YDL056W	YDL056W	YDL056W	CDS	MBP1	1509.94	1815.62	-0.266308	0.0564939	-4.71393	2.42988e-06	5.56037e-06
YBL021C	YBL021C	YBL021C	CDS	HAP3	999.951	1115.73	-0.159357	0.061471	-2.59239	0.00953123	0.0154303
YHR215W	YHR215W	YHR215W	CDS	PHO12	122.835	157.937	-0.361317	0.150283	-2.40424	0.0162061	0.0254517
YAL034C-B	YAL034C-B	YAL034C-B	CDS	YAL034C-B	10.6746	4.97804	1.08463	0.902162	1.20226	0.229262	0.295855
YOR209C	YOR209C	YOR209C	CDS	NPT1	3953.53	4485.8	-0.182489	0.0463913	-3.93368	8.36545e-05	0.00016915
YLR007W	YLR007W	YLR007W	CDS	NSE1	2413.78	1228.52	0.975104	0.0708285	13.7671	4.02007e-43	3.70398e-42
YNL261W	YNL261W	YNL261W	CDS	ORC5	894.997	875.851	0.0308082	0.071782	0.429191	0.667784	0.739465
YAL037C-A	YAL037C-A	YAL037C-A	CDS	YAL037C-A	3.51954	1.35256	1.38284	1.33924	1.03255	0.301813	0.377348
YDR065W	YDR065W	YDR065W	CDS	RRG1	344.471	471.704	-0.452894	0.0963067	-4.70262	2.56838e-06	5.86195e-06
YOR126C	YOR126C	YOR126C	CDS	IAH1	602.521	829.711	-0.461994	0.0770772	-5.99391	2.04857e-09	5.71603e-09
YJL046W	YJL046W	YJL046W	CDS	AIM22	768.859	1017.74	-0.404044	0.0758228	-5.3288	9.88646e-08	2.49808e-07
YKR078W	YKR078W	YKR078W	CDS	YKR078W	872.315	1124.69	-0.366297	0.0609694	-6.00788	1.87966e-09	5.25522e-09
YOR191W	YOR191W	YOR191W	CDS	ULS1	3774.31	3684.83	0.0344484	0.0423098	0.814193	0.415534	0.499585
YOL166W-A	YOL166W-A	YOL166W-A	CDS	YOL166W-A	1.89943	2.44627	-0.344597	1.63031	-0.211369	0.8326	0.875471
YDR272W	YDR272W	YDR272W	CDS	GLO2	6114.57	6404.79	-0.0675993	0.0400104	-1.68954	0.0911152	0.127832
YGR289C	YGR289C	YGR289C	CDS	MAL11	3038.15	1837.64	0.725389	0.0512107	14.1648	1.51301e-45	1.50955e-44
YML020W	YML020W	YML020W	CDS	YML020W	1729.48	1447.94	0.255041	0.0652138	3.91084	9.19768e-05	0.000185494
YLR103C	YLR103C	YLR103C	CDS	CDC45	623.779	478.45	0.381699	0.0981425	3.88923	0.000100561	0.000202071
YOR294W	YOR294W	YOR294W	CDS	RRS1	1047.83	1423.8	-0.442341	0.0638762	-6.92496	4.36085e-12	1.42053e-11
YEL062W	YEL062W	YEL062W	CDS	NPR2	621.445	753.559	-0.276844	0.0869473	-3.18404	0.00145234	0.0026008
YAL041W	YAL041W	YAL041W	CDS	CDC24	2817.2	1347.78	1.06455	0.0516339	20.6173	1.91803e-94	4.68374e-93
YPR031W	YPR031W	YPR031W	CDS	NTO1	992.463	898.036	0.141936	0.0763283	1.85955	0.0629488	0.0906836
YLR038C	YLR038C	YLR038C	CDS	COX12	12887	17097.4	-0.408099	0.0351954	-11.5952	4.35793e-31	2.91252e-30
YNL096C	YNL096C	YNL096C	CDS	RPS7B	3789.09	2731.53	0.472163	0.0492991	9.57753	9.93971e-22	5.00136e-21
YDR038C	YDR038C	YDR038C	CDS	ENA5	361.33	225.202	0.678171	0.119084	5.69489	1.23451e-08	3.29794e-08
YPR160W-A	YPR160W-A	YPR160W-A	CDS	YPR160W-A	0.993644	1.02794	-0.0507956	1.66914	-0.0304322	0.975722	0.986457
YDL187C	YDL187C	YDL187C	CDS	YDL187C	64.9971	38.0432	0.768084	0.298468	2.57342	0.01007	0.0162647
YBR024W	YBR024W	YBR024W	CDS	SCO2	1811.7	3031.77	-0.743197	0.0457411	-16.2479	2.31178e-59	3.13504e-58
YER171W	YER171W	YER171W	CDS	RAD3	1030.94	1164.19	-0.176843	0.0701977	-2.51921	0.0117618	0.0188577
YDL047W	YDL047W	YDL047W	CDS	SIT4	3856.57	3226.26	0.257121	0.0527551	4.87386	1.09438e-06	2.56052e-06
YML046W	YML046W	YML046W	CDS	PRP39	663.989	678.472	-0.0314943	0.0952488	-0.330653	0.740907	0.801998
YGL124C	YGL124C	YGL124C	CDS	MON1	1585.36	1812.76	-0.192407	0.0543137	-3.54251	0.000396334	0.000754428
YDR107C	YDR107C	YDR107C	CDS	TMN2	771.359	1073.89	-0.479928	0.0738478	-6.49888	8.09208e-11	2.44337e-10
YMR276W	YMR276W	YMR276W	CDS	DSK2	16174.8	11237.6	0.52583	0.0592865	8.8693	7.36057e-19	3.30162e-18
YEL059W	YEL059W	YEL059W	CDS	HHY1	76.1421	40.0995	0.936654	0.265978	3.52155	0.000429038	0.000813356
YDL160C-A	YDL160C-A	YDL160C-A	CDS	MHF2	416.374	564.582	-0.442906	0.106197	-4.1706	3.03797e-05	6.35815e-05
YLR165C	YLR165C	YLR165C	CDS	PUS5	1636.04	1020.17	0.680262	0.0626119	10.8647	1.69713e-27	1.03157e-26
YCR069W	YCR069W	YCR069W	CDS	CPR4	3793.57	3798.75	-0.00192306	0.0401411	-0.0479077	0.96179	0.977323
YKL223W	YKL223W	YKL223W	CDS	YKL223W	0	0
YGR146C-A	YGR146C-A	YGR146C-A	CDS	YGR146C-A	26.4932	19.1645	0.466172	0.407925	1.14279	0.253126	0.323128
YKL027W	YKL027W	YKL027W	CDS	TCD2	933.299	827.219	0.174574	0.08785	1.98718	0.0469019	0.0688302
YJL173C	YJL173C	YJL173C	CDS	RFA3	1294.06	1660.07	-0.35813	0.067699	-5.29003	1.22296e-07	3.06905e-07
YDR152W	YDR152W	YDR152W	CDS	GIR2	2720.69	3206.51	-0.238254	0.0478021	-4.98418	6.22254e-07	1.48423e-06
YKL127W	YKL127W	YKL127W	CDS	PGM1	703.315	722.264	-0.0370067	0.102765	-0.360109	0.718766	0.78191
YDR309C	YDR309C	YDR309C	CDS	GIC2	2210.04	3135.59	-0.505041	0.056422	-8.95114	3.51836e-19	1.59871e-18
YLR386W	YLR386W	YLR386W	CDS	VAC14	2644.96	1852.16	0.512723	0.055437	9.24874	2.27156e-20	1.0896e-19
YLR371W	YLR371W	YLR371W	CDS	ROM2	5930.66	3298.36	0.846164	0.0392907	21.536	7.16738e-103	2.00228e-101
YDL169C	YDL169C	YDL169C	CDS	UGX2	3780.83	3543.7	0.0924014	0.0492686	1.87546	0.060729	0.0876849
YAL042C-A	YAL042C-A	YAL042C-A	CDS	YAL042C-A	166.17	40.04	2.04147	0.213263	9.57254	1.04314e-21	5.24497e-21
YLR092W	YLR092W	YLR092W	CDS	SUL2	778.554	538.62	0.531272	0.0896621	5.92526	3.11795e-09	8.61384e-09
YLR423C	YLR423C	YLR423C	CDS	ATG17	1302.62	1151.67	0.176626	0.0672349	2.627	0.00861425	0.0140434
YMR072W	YMR072W	YMR072W	CDS	ABF2	5866.55	10587.5	-0.851882	0.0398115	-21.3979	1.39821e-101	3.79966e-100
YJR033C	YJR033C	YJR033C	CDS	RAV1	1953.29	2009.39	-0.0407802	0.0586389	-0.695446	0.486776	0.57108
YKR056W	YKR056W	YKR056W	CDS	TRM2	1461.62	1705.07	-0.222114	0.060089	-3.69641	0.000218673	0.000426596
YGL011C	YGL011C	YGL011C	CDS	SCL1	7487.27	7540.74	-0.0101872	0.0407332	-0.250096	0.802513	0.853863
YIR036C	YIR036C	YIR036C	CDS	IRC24	3885	5195.44	-0.418806	0.0594683	-7.0425	1.88816e-12	6.27053e-12
YMR123W	YMR123W	YMR123W	CDS	PKR1	1212.07	1159.13	0.0647492	0.0620205	1.044	0.296487	0.371486
YDR406W	YDR406W	YDR406W	CDS	PDR15	6754.05	4180.27	0.692963	0.0463588	14.9478	1.60991e-50	1.8402e-49
YGR073C	YGR073C	YGR073C	CDS	YGR073C	95.2768	74.1754	0.365387	0.196834	1.85632	0.0634077	0.0913259
YGR209C	YGR209C	YGR209C	CDS	TRX2	8424.77	13152.7	-0.642753	0.0454666	-14.1368	2.25224e-45	2.23433e-44
YLR183C	YLR183C	YLR183C	CDS	TOS4	709.779	1015.64	-0.515708	0.0936573	-5.50633	3.66389e-08	9.50541e-08
YNL050C	YNL050C	YNL050C	CDS	YNL050C	1115.26	1400.57	-0.327473	0.0692655	-4.7278	2.2697e-06	5.21263e-06
YMR304C-A	YMR304C-A	YMR304C-A	CDS	YMR304C-A	2217.63	1961.94	0.177216	0.090112	1.96662	0.0492275	0.0720614
YLR240W	YLR240W	YLR240W	CDS	VPS34	3085.72	1616.59	0.932868	0.0487919	19.1193	1.7443e-81	3.39336e-80
YOR039W	YOR039W	YOR039W	CDS	CKB2	1572.53	1955.3	-0.313917	0.0516486	-6.07793	1.21743e-09	3.4326e-09
YDL234C	YDL234C	YDL234C	CDS	GYP7	9592.75	5683.61	0.755083	0.0395754	19.0796	3.72929e-81	7.23483e-80
YGL080W	YGL080W	YGL080W	CDS	MPC1	1301.53	1788.7	-0.460915	0.0622918	-7.39929	1.36916e-13	4.86131e-13
YNL136W	YNL136W	YNL136W	CDS	EAF7	4786.16	5321.06	-0.152859	0.10024	-1.52493	0.127278	0.173954
YKL049C	YKL049C	YKL049C	CDS	CSE4	1366.71	1645.89	-0.268016	0.0722935	-3.70733	0.000209452	0.000409178
YBL002W	YBL002W	YBL002W	CDS	HTB2	2836.6	3753.49	-0.404833	0.0514453	-7.8692	3.56914e-15	1.35546e-14
YNR038W	YNR038W	YNR038W	CDS	DBP6	836.196	1232.24	-0.558439	0.0784969	-7.11415	1.12601e-12	3.80273e-12
YBR037C	YBR037C	YBR037C	CDS	SCO1	1961.89	2908.11	-0.566018	0.0470934	-12.019	2.82204e-33	2.01319e-32
YGL140C	YGL140C	YGL140C	CDS	YGL140C	3235.27	2639.97	0.293639	0.0479564	6.12303	9.18142e-10	2.60345e-09
YCL029C	YCL029C	YCL029C	CDS	BIK1	766.888	1059.77	-0.466326	0.0692916	-6.72991	1.69768e-11	5.3384e-11
YFL038C	YFL038C	YFL038C	CDS	YPT1	10062.9	12133.4	-0.269753	0.0377965	-7.137	9.53899e-13	3.23399e-12
YJR131W	YJR131W	YJR131W	CDS	MNS1	1856.33	1946.98	-0.0691385	0.0546888	-1.26422	0.206152	0.268814
YNR012W	YNR012W	YNR012W	CDS	URK1	928.535	1151.53	-0.310474	0.0754217	-4.1165	3.84668e-05	7.98847e-05
YBR028C	YBR028C	YBR028C	CDS	YPK3	876.96	1174.7	-0.425066	0.0726248	-5.8529	4.83085e-09	1.32049e-08
YNL110C	YNL110C	YNL110C	CDS	NOP15	1128.5	1688.33	-0.581011	0.100578	-5.77674	7.61603e-09	2.05765e-08
YAL045C	YAL045C	YAL045C	CDS	YAL045C	213.329	6.90852	4.94163	1.24033	3.98411
YDR367W	YDR367W	YDR367W	CDS	KEI1	1048.78	1390.68	-0.406618	0.0653926	-6.2181	5.03197e-10	1.44981e-09
YHR072W	YHR072W	YHR072W	CDS	ERG7	2693.94	2351.21	0.195415	0.0476203	4.10362	4.06741e-05	8.42682e-05
YPL059W	YPL059W	YPL059W	CDS	GRX5	2607.65	3436.5	-0.397085	0.0424605	-9.35186	8.61165e-21	4.18829e-20
YGL253W	YGL253W	YGL253W	CDS	HXK2	8875.52	7805.55	0.185711	0.0413498	4.49121	7.08185e-06	1.5627e-05
tL%28UAA%29K	tL%28UAA%29K	tL%28UAA%29K	noncoding_exon	tL%28UAA%29K	0	0	0	4.40736	0	1	1
YAL051W	YAL051W	YAL051W	CDS	OAF1	4044.26	1713.83	1.2382	0.0464496	26.6569	1.48988e-156	8.00412e-155
YJL010C	YJL010C	YJL010C	CDS	NOP9	640.591	840.109	-0.390485	0.0805451	-4.84802	1.24697e-06	2.90877e-06
YHL045W	YHL045W	YHL045W	CDS	YHL045W	21.9753	34.5431	-0.646727	0.400537	-1.61465	0.106387	0.147275
YOR337W	YOR337W	YOR337W	CDS	TEA1	1038.24	1131.52	-0.12352	0.0666116	-1.85434	0.0636911	0.0917151
YMR010W	YMR010W	YMR010W	CDS	YMR010W	1509.56	915.887	0.722489	0.0709799	10.1788	2.46629e-24	1.36378e-23
YOR097C	YOR097C	YOR097C	CDS	YOR097C	1576.28	1503.68	0.0673182	0.0595636	1.13019	0.258396	0.329193
YHR118C	YHR118C	YHR118C	CDS	ORC6	1111.92	1209.69	-0.123426	0.065201	-1.89302	0.0583558	0.0844502
YGR024C	YGR024C	YGR024C	CDS	THG1	1706.57	1679.11	0.0231213	0.0688737	0.335707	0.737092	0.798736
YOL023W	YOL023W	YOL023W	CDS	IFM1	1248.5	2106.18	-0.755305	0.0518892	-14.5561	5.34029e-48	5.71157e-47
YPL253C	YPL253C	YPL253C	CDS	VIK1	265.336	349.382	-0.396409	0.126345	-3.13752	0.00170381	0.00303016
YOR259C	YOR259C	YOR259C	CDS	RPT4	7121.73	7435.08	-0.0620207	0.0323793	-1.91544	0.0554362	0.080547
YER154W	YER154W	YER154W	CDS	OXA1	4366.18	4214.06	0.0522781	0.042394	1.23315	0.21752	0.28211
YBR300C	YBR300C	YBR300C	CDS	YBR300C	2.10713	1.57574	0.345843	1.46852	0.235504	0.813818	0.862934
YEL036C	YEL036C	YEL036C	CDS	ANP1	1715.97	1344.53	0.351578	0.0621402	5.65783	1.53301e-08	4.06013e-08
YBR260C	YBR260C	YBR260C	CDS	RGD1	1349.91	1326.03	0.0263117	0.0601772	0.437237	0.66194	0.734342
YPL124W	YPL124W	YPL124W	CDS	SPC29	394.373	498.071	-0.338874	0.106593	-3.17914	0.00147714	0.00264319
YAL042W	YAL042W	YAL042W	CDS	ERV46	8851.69	6107.74	0.536016	0.0471805	11.361	6.54176e-30	4.25793e-29
YAL035W	YAL035W	YAL035W	CDS	FUN12	34039.6	18302.5	0.895174	0.0905102	9.89031	4.58584e-23	2.40808e-22
YBR235W	YBR235W	YBR235W	CDS	VHC1	2314.75	2197.48	0.0747666	0.0573645	1.30336	0.192452	0.252648
YDR001C	YDR001C	YDR001C	CDS	NTH1	14160.1	12756.3	0.150555	0.0326129	4.61644	3.90383e-06	8.80348e-06
YIL162W	YIL162W	YIL162W	CDS	SUC2	12441.8	8149.57	0.61057	0.046134	13.2347	5.53018e-40	4.7565e-39
YOL141W	YOL141W	YOL141W	CDS	PPM2	217.4	314.299	-0.532044	0.127921	-4.15916	3.19416e-05	6.67705e-05
YHR145C	YHR145C	YHR145C	CDS	YHR145C	5.63477	3.13177	0.852621	1.32613	0.642939	0.520263	0.604579
YBR195C	YBR195C	YBR195C	CDS	MSI1	369.043	324.015	0.190558	0.113173	1.68377	0.0922256	0.129277
YIL039W	YIL039W	YIL039W	CDS	TED1	1950.86	2575.18	-0.401146	0.050294	-7.97602	1.51127e-15	5.85722e-15
YGR122W	YGR122W	YGR122W	CDS	YGR122W	1049.17	986.218	0.0907229	0.0682059	1.33013	0.183474	0.242182
YPL092W	YPL092W	YPL092W	CDS	SSU1	4588.15	6553.26	-0.514738	0.0398142	-12.9285	3.10821e-38	2.58118e-37
YAL053W	YAL053W	YAL053W	CDS	FLC2	16527.8	7079.16	1.22295	0.0333544	36.6652	2.61694e-294	5.71146e-292
YGR161C-D	YGR161C-D	YGR161C-D	CDS	YGR161C-D	726.669	751.366	-0.0483357	1.00703	-0.0479984
YMR315W	YMR315W	YMR315W	CDS	YMR315W	5516.62	5436.9	0.0210994	0.0470592	0.448358	0.653895	0.727893
YPL029W	YPL029W	YPL029W	CDS	SUV3	526.807	682.737	-0.37405	0.0906845	-4.12474	3.71154e-05	7.73311e-05
YDR384C	YDR384C	YDR384C	CDS	ATO3	4579.63	2551.25	0.8444	0.068677	12.2952	9.60718e-35	7.22245e-34
YML007W	YML007W	YML007W	CDS	YAP1	7618.2	7006.91	0.119992	0.0404301	2.9679	0.0029984	0.0051693
YER063W	YER063W	YER063W	CDS	THO1	2343.89	3340.65	-0.509629	0.0455831	-11.1802	5.09703e-29	3.2391e-28
YDR481C	YDR481C	YDR481C	CDS	PHO8	10372.9	8934.18	0.215866	0.0381712	5.6552	1.55666e-08	4.11806e-08
YER014W	YER014W	YER014W	CDS	HEM14	1870.2	2222.09	-0.247811	0.0541966	-4.57244	4.82069e-06	1.07909e-05
YPR041W	YPR041W	YPR041W	CDS	TIF5	3391.43	3951.59	-0.220804	0.0412615	-5.35133	8.73111e-08	2.21336e-07
YNL213C	YNL213C	YNL213C	CDS	RRG9	1465	1944.79	-0.408625	0.0592906	-6.89191	5.50497e-12	1.77829e-11
YKL006C-A	YKL006C-A	YKL006C-A	CDS	SFT1	1220.63	1519.21	-0.316446	0.0728447	-4.34412	1.39837e-05	3.005e-05
YDL159W-A	YDL159W-A	YDL159W-A	CDS	YDL159W-A	1.28491	0.697179	0.920431	1.56783	0.587072	0.557155	0.640938
YBR058C	YBR058C	YBR058C	CDS	UBP14	1871.16	2790.3	-0.577291	0.0511849	-11.2785	1.67494e-29	1.07814e-28
YLR024C	YLR024C	YLR024C	CDS	UBR2	2503.41	1381.69	0.855699	0.0582311	14.6949	6.95196e-49	7.5982e-48
YLR071C	YLR071C	YLR071C	CDS	RGR1	4261.28	2549	0.741397	0.0413985	17.9088	1.00705e-71	1.67458e-70
YHR092C	YHR092C	YHR092C	CDS	HXT4	2782.85	1770.59	0.652628	0.0617296	10.5724	4.00274e-26	2.33934e-25
YDL199C	YDL199C	YDL199C	CDS	YDL199C	2065.06	1886.01	0.129057	0.0542227	2.38014	0.0173061	0.0270757
YDR434W	YDR434W	YDR434W	CDS	GPI17	2120.21	2300.52	-0.117015	0.0463751	-2.52322	0.0116286	0.0186485
YER181C	YER181C	YER181C	CDS	YER181C	29.3133	31.3198	-0.0996793	0.431396	-0.231062	0.817266	0.864202
YNL228W	YNL228W	YNL228W	CDS	YNL228W	84.1557	58.2977	0.523649	0.213578	2.45179	0.0142146	0.0225215
YAL054C	YAL054C	YAL054C	CDS	ACS1	34387.6	16976.9	1.01837	0.0530744	19.1876	4.70019e-82	9.27292e-81
YDL064W	YDL064W	YDL064W	CDS	UBC9	1463.42	1467.3	-0.00171211	0.0652129	-0.0262542	0.979055	0.988066
YDL031W	YDL031W	YDL031W	CDS	DBP10	2654.39	3600.33	-0.439247	0.060928	-7.20929	5.62452e-13	1.92746e-12
YMR257C	YMR257C	YMR257C	CDS	PET111	1141.49	1129.24	0.0129713	0.0631024	0.205559	0.837135	0.877465
YBL108W	YBL108W	YBL108W	CDS	YBL108W	0.702376	0.306789	0.91322	2.89858	0.315058	0.752718	0.811103
YDR046C	YDR046C	YDR046C	CDS	BAP3	3841.54	5438.3	-0.501578	0.0463985	-10.8102	3.07932e-27	1.86038e-26
Q0158	Q0158	Q0158	noncoding_exon	21S_RRNA	34095.9	57035.3	-0.742277	0.103031	-7.2044	5.82989e-13	1.99686e-12
YOR253W	YOR253W	YOR253W	CDS	NAT5	627.208	857.444	-0.451199	0.0723081	-6.23995	4.37705e-10	1.26686e-09
YOR202W	YOR202W	YOR202W	CDS	HIS3	2481.3	2841.89	-0.194511	0.0705965	-2.75525	0.00586471	0.00977078
YDR521W	YDR521W	YDR521W	CDS	YDR521W	3.74684	3.39676	0.154538	1.4384	0.107437	0.914442	0.939739
YGL245W	YGL245W	YGL245W	CDS	GUS1	6743.21	10401.8	-0.625226	0.0414081	-15.0991	1.64083e-51	1.89728e-50
YGR006W	YGR006W	YGR006W	CDS	PRP18	511.124	439.148	0.218344	0.0995544	2.19322	0.0282919	0.0428427
YGR079W	YGR079W	YGR079W	CDS	YGR079W	944.285	871.311	0.117419	0.102805	1.14215	0.25339	0.323406
YDL119C	YDL119C	YDL119C	CDS	YDL119C	868.804	697.775	0.317443	0.0837653	3.78968	0.000150843	0.000298185
YKL151C	YKL151C	YKL151C	CDS	YKL151C	5222.7	8636.98	-0.725388	0.0378542	-19.1627	7.58516e-82	1.48805e-80
YGL198W	YGL198W	YGL198W	CDS	YIP4	3199.69	3111.11	0.0413162	0.0636023	0.649603	0.515949	0.600665
YDL086W	YDL086W	YDL086W	CDS	YDL086W	3904.4	5016.86	-0.361165	0.0493769	-7.31445	2.5843e-13	9.06063e-13
YBL091C-A	YBL091C-A	YBL091C-A	CDS	SCS22	547.13	466.474	0.232289	0.104102	2.23136	0.0256576	0.0390058
YLR361C-A	YLR361C-A	YLR361C-A	CDS	YLR361C-A	2525.33	1805.5	0.484015	0.0630052	7.68215	1.56444e-14	5.7994e-14
YBR141W-A	YBR141W-A	YBR141W-A	CDS	YBR141W-A	19.0703	22.1346	-0.204793	0.389778	-0.525408	0.5993	0.679245
YOR170W	YOR170W	YOR170W	CDS	YOR170W	3.2641	6.19716	-0.919687	1.29075	-0.712523	0.476141	0.560487
YHR038W	YHR038W	YHR038W	CDS	RRF1	730.808	1283.72	-0.81155	0.0688591	-11.7857	4.62757e-32	3.19673e-31
YML069W	YML069W	YML069W	CDS	POB3	3671.05	3633.37	0.0155565	0.0441447	0.352398	0.72454	0.787087
YKR019C	YKR019C	YKR019C	CDS	IRS4	1199.09	836.142	0.519407	0.0645115	8.05139	8.18606e-16	3.22456e-15
tI%28AAU%29I1	tI%28AAU%29I1	tI%28AAU%29I1	noncoding_exon	tI%28AAU%29I1	0	0
YJR073C	YJR073C	YJR073C	CDS	OPI3	11045.9	18822.4	-0.7687	0.0513053	-14.9829	9.50325e-51	1.08804e-49
YGR279C	YGR279C	YGR279C	CDS	SCW4	13594.2	19047	-0.48647	0.0405345	-12.0014	3.49487e-33	2.48303e-32
YBL056W	YBL056W	YBL056W	CDS	PTC3	4782.66	5713.01	-0.256479	0.0495212	-5.17918	2.2286e-07	5.49239e-07
YCR022C	YCR022C	YCR022C	CDS	YCR022C	46.1985	33.5964	0.44714	0.363377	1.23051	0.218505	0.282888
YLL015W	YLL015W	YLL015W	CDS	BPT1	7953.76	4731.6	0.748949	0.0367103	20.4016	1.61839e-92	3.78021e-91
YNL195C	YNL195C	YNL195C	CDS	YNL195C	6387.87	5476.26	0.222416	0.0442153	5.03029	4.8975e-07	1.17742e-06
YFL060C	YFL060C	YFL060C	CDS	SNO3	150.908	222.292	-0.558099	0.16896	-3.30315	0.000956064	0.00174795
YDR173C	YDR173C	YDR173C	CDS	ARG82	1048.36	1127.18	-0.106654	0.0701986	-1.51932	0.128682	0.175736
YBR208C	YBR208C	YBR208C	CDS	DUR1%2C2	3121.1	2375.65	0.393669	0.0533215	7.38293	1.54843e-13	5.4728e-13
YCL057W	YCL057W	YCL057W	CDS	PRD1	5184.55	5719.04	-0.140992	0.0374368	-3.76613	0.0001658	0.000326366
YAL061W	YAL061W	YAL061W	CDS	BDH2	29455	10503.3	1.48796	0.0426912	34.854	3.70453e-266	5.74943e-264
YAL063C	YAL063C	YAL063C	CDS	FLO9	1690.72	612.618	1.46586	0.0743791	19.708	1.84028e-86	3.93044e-85
YAL063C-A	YAL063C-A	YAL063C-A	CDS	YAL063C-A	55.7784	14.2418	1.96891	0.449551	4.37972	1.18832e-05	2.56863e-05
YAL064C-A	YAL064C-A	YAL064C-A	CDS	TDA8	14.653	3.34881	2.12043	0.855978	2.47721	0.0132415	0.0210762
YAL064W	YAL064W	YAL064W	CDS	YAL064W	46.1899	8.57212	2.43596	0.479334	5.08197	3.73542e-07	9.07732e-07
RUF5-2	RUF5-2	RUF5-2	noncoding_exon	RUF5-2	29.4976	15.3472	0.944638	0.403367	2.34188	0.0191867	0.0298043
YDL173W	YDL173W	YDL173W	CDS	PAR32	7732.4	8478.69	-0.13264	0.0433751	-3.05798	0.00222836	0.00390341
YJR047C	YJR047C	YJR047C	CDS	ANB1	409.65	218.993	0.907909	0.13912	6.52609	6.75073e-11	2.05434e-10
YMR006C	YMR006C	YMR006C	CDS	PLB2	2769.43	2562.56	0.112346	0.0797722	1.40833	0.159033	0.212938
YKL145W-A	YKL145W-A	YKL145W-A	CDS	YKL145W-A	0.993644	1.02794	-0.0507956	1.66914	-0.0304322	0.975722	0.986457
YAL016W	YAL016W	YAL016W	CDS	TPD3	9843.52	7004.46	0.491099	0.0385948	12.7245	4.32349e-37	3.43128e-36
YBL068W-A	YBL068W-A	YBL068W-A	CDS	YBL068W-A	3.2722	3.08382	0.0919998	0.959475	0.0958856	0.923611	0.947349
YAL065C	YAL065C	YAL065C	CDS	YAL065C	68.3653	23.2461	1.55924	0.2808	5.55286	2.8103e-08	7.32903e-08
YHR011W	YHR011W	YHR011W	CDS	DIA4	537.863	951.883	-0.820859	0.0793088	-10.3502	4.1778e-25	2.37992e-24
YPL152W	YPL152W	YPL152W	CDS	RRD2	1225.31	1370.62	-0.162584	0.0723677	-2.24664	0.0246629	0.0376411
YJL150W	YJL150W	YJL150W	CDS	YJL150W	13.2044	13.4886	-0.0126516	0.525304	-0.0240843	0.980785	0.988999
tD%28GUC%29I2	tD%28GUC%29I2	tD%28GUC%29I2	noncoding_exon	tD%28GUC%29I2	1.16507	0.962167	0.301472	1.8416	0.163701	0.869966	0.904413
tD%28GUC%29I1	tD%28GUC%29I1	tD%28GUC%29I1	noncoding_exon	tD%28GUC%29I1	2.26662	3.01805	-0.414222	1.13753	-0.364141	0.715753	0.779239
YAL066W	YAL066W	YAL066W	CDS	YAL066W	8.2046	3.21726	1.31527	0.939051	1.40064	0.161322	0.215838
YBR109C	YBR109C	YBR109C	CDS	CMD1	5487.94	7180.68	-0.38821	0.0365488	-10.6217	2.36205e-26	1.39683e-25
tF%28GAA%29M	tF%28GAA%29M	tF%28GAA%29M	noncoding_exon	tF%28GAA%29M	0	0
YDR346C	YDR346C	YDR346C	CDS	SVF1	3628.29	4194.91	-0.209534	0.0428806	-4.88646	1.02667e-06	2.40452e-06
YAR002C-A	YAR002C-A	YAR002C-A	CDS	ERP1	5648.84	3762.31	0.586298	0.047838	12.2559	1.56193e-34	1.17044e-33
YOL077W-A	YOL077W-A	YOL077W-A	CDS	ATP19	5255.51	10164.6	-0.951468	0.0626286	-15.1922	3.98114e-52	4.63405e-51
YAL068C	YAL068C	YAL068C	CDS	PAU8	16.257	6.89495	1.2467	0.735858	1.69422	0.0902241	0.126684
YBR236C	YBR236C	YBR236C	CDS	ABD1	1874.56	1999.19	-0.0922791	0.0547345	-1.68594	0.0918071	0.128751
tF%28GAA%29B	tF%28GAA%29B	tF%28GAA%29B	noncoding_exon	tF%28GAA%29B	0	0
tV%28AAC%29K1	tV%28AAC%29K1	tV%28AAC%29K1	noncoding_exon	tV%28AAC%29K1	2.68966	1.74909	0.62565	1.48025	0.422664	0.67254	0.743435
tV%28AAC%29K2	tV%28AAC%29K2	tV%28AAC%29K2	noncoding_exon	tV%28AAC%29K2	1.24099	2.11551	-0.735986	1.82796	-0.402627	0.687223	0.754767
YDL242W	YDL242W	YDL242W	CDS	YDL242W	16.6437	18.8055	-0.167818	0.419864	-0.399696	0.68938	0.756801
YBR189W	YBR189W	YBR189W	CDS	RPS9B	11137.4	7023.44	0.665152	0.0487157	13.6537	1.91758e-42	1.73927e-41
YER085C	YER085C	YER085C	CDS	YER085C	41.0746	25.4668	0.673785	0.32287	2.08686	0.0369007	0.0549075
YJL225C	YJL225C	YJL225C	CDS	YJL225C	43.7028	33.9713	0.371086	0.333155	1.11385	0.265341	0.336935
YKL064W	YKL064W	YKL064W	CDS	MNR2	7691.18	5620.2	0.451975	0.0365635	12.3614	4.22973e-35	3.21091e-34
YLR265C	YLR265C	YLR265C	CDS	NEJ1	910.337	814.687	0.158088	0.0812107	1.94664	0.0515784	0.075275
YKR022C	YKR022C	YKR022C	CDS	NTR2	1062.51	1318.9	-0.313699	0.0687647	-4.56193	5.06867e-06	1.13279e-05
YLR287C	YLR287C	YLR287C	CDS	YLR287C	1046.61	685.895	0.607648	0.0957955	6.34318	2.25067e-10	6.61839e-10
YPL174C	YPL174C	YPL174C	CDS	NIP100	992.323	1014.7	-0.0338198	0.0756723	-0.446924	0.65493	0.728813
YOR070C	YOR070C	YOR070C	CDS	GYP1	1620.9	1415.29	0.194767	0.0543547	3.58325	0.000339349	0.000650566
YDR403W	YDR403W	YDR403W	CDS	DIT1	569.67	296.717	0.941754	0.13561	6.94457	3.79621e-12	1.23949e-11
YOL093W	YOL093W	YOL093W	CDS	TRM10	754.228	1147.6	-0.603916	0.0955786	-6.31853	2.64067e-10	7.72621e-10
YOL042W	YOL042W	YOL042W	CDS	NGL1	1101.76	1091.53	0.0107179	0.0670984	0.159735	0.87309	0.906715
YAL068W-A	YAL068W-A	YAL068W-A	CDS	YAL068W-A	0.626464	3.89662	-2.61043	1.74195	-1.49856	0.133987	0.182588
YCL037C	YCL037C	YCL037C	CDS	SRO9	356.246	373.893	-0.0695267	0.129767	-0.535779	0.592111	0.672079
YIL025C	YIL025C	YIL025C	CDS	YIL025C	44.441	36.1587	0.307123	0.361258	0.850149	0.395242	0.477738
YDR545C-A	YDR545C-A	YDR545C-A	CDS	YDR545C-A	0	0
YAR003W	YAR003W	YAR003W	CDS	SWD1	1467.75	713.578	1.04004	0.0699919	14.8595	6.04043e-50	6.78237e-49
YML131W	YML131W	YML131W	CDS	YML131W	7476.58	4968.07	0.589409	0.0431214	13.6686	1.56383e-42	1.42211e-41
YNL245C	YNL245C	YNL245C	CDS	CWC25	717.799	720.479	-0.00585664	0.0781399	-0.0749507	0.940254	0.960892
YNR024W	YNR024W	YNR024W	CDS	MPP6	1493.9	1899.14	-0.346359	0.0774972	-4.46931	7.84708e-06	1.72502e-05
YFL013W-A	YFL013W-A	YFL013W-A	CDS	YFL013W-A	36.2535	37.8838	-0.05716	0.351071	-0.162816	0.870663	0.904868
YAR010C	YAR010C	YAR010C	CDS	YAR010C	0.335195	4.22549	-3.56561	1.69333	-2.10568	0.0352325	0.0525777
YPL043W	YPL043W	YPL043W	CDS	NOP4	1655.09	2174.23	-0.393294	0.0718259	-5.47565	4.35912e-08	1.12672e-07
YMR294W-A	YMR294W-A	YMR294W-A	CDS	YMR294W-A	17.7581	25.0807	-0.511223	0.438639	-1.16548	0.243827	0.312628
YBR056C-B	YBR056C-B	YBR056C-B	CDS	YBR056C-B	3.2722	5.17536	-0.651857	0.847427	-0.769218	0.441764	0.526768
YKL002W	YKL002W	YKL002W	CDS	DID4	4287.71	4408.64	-0.0396083	0.0424386	-0.933307	0.350661	0.429653
YDR328C	YDR328C	YDR328C	CDS	SKP1	6898.24	7158.48	-0.053035	0.0420925	-1.25996	0.207683	0.270658
YIR009W	YIR009W	YIR009W	CDS	MSL1	238.217	231.423	0.0379243	0.130191	0.291298	0.770823	0.826313
YBR154C	YBR154C	YBR154C	CDS	RPB5	1969.12	2685.01	-0.447186	0.0590809	-7.56904	3.75997e-14	1.36414e-13
YLR001C	YLR001C	YLR001C	CDS	YLR001C	5752.42	2902.98	0.986571	0.0409488	24.0928	2.97679e-128	1.12988e-126
YAR019C	YAR019C	YAR019C	CDS	CDC15	4275.43	1583.84	1.43245	0.0486471	29.4458	1.42374e-190	1.04667e-188
YKR101W	YKR101W	YKR101W	CDS	SIR1	967.49	948.662	0.0283431	0.0737266	0.384435	0.700656	0.766868
YMR230W-A	YMR230W-A	YMR230W-A	CDS	YMR230W-A	8.9428	14.5186	-0.715166	0.894938	-0.799123	0.424219	0.508801
YER115C	YER115C	YER115C	CDS	SPR6	1597.48	1307.93	0.289964	0.0567812	5.1067	3.27836e-07	7.99444e-07
YAR019W-A	YAR019W-A	YAR019W-A	CDS	YAR019W-A	54.3152	15.5445	1.81245	0.385212	4.70507	2.53784e-06	5.79415e-06
YER148W	YER148W	YER148W	CDS	SPT15	3805.21	3025.16	0.331124	0.0430375	7.69386	1.42763e-14	5.30067e-14
YCR050C	YCR050C	YCR050C	CDS	YCR050C	8.12102	6.51624	0.308056	0.7787	0.395604	0.692398	0.759495
YGL033W	YGL033W	YGL033W	CDS	HOP2	31.1497	59.3737	-0.941671	0.287077	-3.2802	0.00103732	0.00189107
YOR303W	YOR303W	YOR303W	CDS	CPA1	14234.4	10288.6	0.468404	0.0328538	14.2572	4.04236e-46	4.10944e-45
YIL087C	YIL087C	YIL087C	CDS	AIM19	4342.27	4421.07	-0.0255485	0.0497435	-0.513605	0.607528	0.686632
YMR192W	YMR192W	YMR192W	CDS	GYL1	1523.04	1433.78	0.0897647	0.0645449	1.39073	0.164307	0.219438
YJL221C	YJL221C	YJL221C	CDS	IMA4	2.35447	2.39832	-0.0373384	1.2923	-0.028893	0.97695	0.987269
YMR229C	YMR229C	YMR229C	CDS	RRP5	4450.45	4713.94	-0.0831031	0.0575279	-1.44457	0.148579	0.200324
YDL085W	YDL085W	YDL085W	CDS	NDE2	7716.53	10390.3	-0.4294	0.0340698	-12.6036	2.01841e-36	1.5768e-35
YLL038C	YLL038C	YLL038C	CDS	ENT4	724.267	573.049	0.337859	0.0854498	3.95389	7.68914e-05	0.00015579
YOR056C	YOR056C	YOR056C	CDS	NOB1	2650.3	2979.89	-0.168915	0.04824	-3.50155	0.000462561	0.000873587
YOL108C	YOL108C	YOL108C	CDS	INO4	1995.18	1541.29	0.370884	0.058581	6.33113	2.43371e-10	7.12366e-10
YJL123C	YJL123C	YJL123C	CDS	MTC1	5037.14	8347.01	-0.728531	0.0453103	-16.0787	3.5986e-58	4.78716e-57
YOR270C	YOR270C	YOR270C	CDS	VPH1	6435.67	7987.22	-0.311586	0.04894	-6.36669	1.93155e-10	5.704e-10
YPR069C	YPR069C	YPR069C	CDS	SPE3	2581.8	2813.38	-0.123621	0.0530653	-2.3296	0.0198274	0.0306834
YOL068C	YOL068C	YOL068C	CDS	HST1	3835.13	2952.16	0.37704	0.0442061	8.52914	1.47433e-17	6.30542e-17
YMR182C	YMR182C	YMR182C	CDS	RGM1	397.748	447.017	-0.166348	0.102967	-1.61554	0.106193	0.147066
YBR201W	YBR201W	YBR201W	CDS	DER1	789.817	749.703	0.0735613	0.0726893	1.012	0.31154	0.388119
YAR020C	YAR020C	YAR020C	CDS	PAU7	348.728	80.9265	2.11275	0.167489	12.6143	1.7616e-36	1.38081e-35
YDR415C	YDR415C	YDR415C	CDS	YDR415C	1042.39	924.086	0.171707	0.0685895	2.5034	0.0123006	0.019663
YGL161C	YGL161C	YGL161C	CDS	YIP5	3519.04	4046.1	-0.200869	0.0477123	-4.21001	2.55359e-05	5.375e-05
YOL133W	YOL133W	YOL133W	CDS	HRT1	1192.97	982.984	0.278981	0.0653088	4.27173	1.93965e-05	4.11748e-05
YNL263C	YNL263C	YNL263C	CDS	YIF1	1667.21	2060.94	-0.304968	0.0618492	-4.93083	8.18814e-07	1.93353e-06
YHR217C	YHR217C	YHR217C	CDS	YHR217C	5.99341	4.37675	0.467297	0.832096	0.56159	0.574396	0.65742
YDR128W	YDR128W	YDR128W	CDS	MTC5	2864.62	2878.08	-0.00704284	0.0555945	-0.126682	0.899192	0.928027
YOR193W	YOR193W	YOR193W	CDS	PEX27	875.929	859.594	0.0260846	0.0690346	0.377848	0.705544	0.771371
YER028C	YER028C	YER028C	CDS	MIG3	783.736	640.244	0.293515	0.092832	3.16178	0.00156806	0.00279855
YMR052W	YMR052W	YMR052W	CDS	FAR3	1017.92	1080.9	-0.0854813	0.0657917	-1.29927	0.193851	0.254245
YAR023C	YAR023C	YAR023C	CDS	YAR023C	777.546	306.494	1.34444	0.0890983	15.0894	1.90235e-51	2.19604e-50
YMR203W	YMR203W	YMR203W	CDS	TOM40	7309.97	10309	-0.496232	0.0376925	-13.1653	1.39022e-39	1.18987e-38
YKR076W	YKR076W	YKR076W	CDS	ECM4	4722.05	7253.17	-0.619811	0.0450765	-13.7502	5.07923e-43	4.64919e-42
YEL064C	YEL064C	YEL064C	CDS	AVT2	1106.77	1000.12	0.144497	0.0685615	2.10755	0.0350701	0.0523578
YDR270W	YDR270W	YDR270W	CDS	CCC2	1642.81	1385.23	0.247362	0.0549861	4.49863	6.83936e-06	1.51159e-05
YPR033C	YPR033C	YPR033C	CDS	HTS1	3516.12	4481.73	-0.350025	0.0467676	-7.48436	7.18987e-14	2.58037e-13
YGR230W	YGR230W	YGR230W	CDS	BNS1	574.473	846.832	-0.560966	0.0785754	-7.1392	9.38778e-13	3.18428e-12
YPR062W	YPR062W	YPR062W	CDS	FCY1	5808.74	5439.46	0.0950768	0.0431967	2.20102	0.0277347	0.0420719
YDR528W	YDR528W	YDR528W	CDS	HLR1	419.345	294.505	0.510499	0.122729	4.15955	3.18873e-05	6.6677e-05
YER173W	YER173W	YER173W	CDS	RAD24	799.418	960.203	-0.265024	0.0885153	-2.9941	0.00275257	0.00476666
YBR026C	YBR026C	YBR026C	CDS	ETR1	5780.69	10595.2	-0.874774	0.0379961	-23.0227	2.76167e-117	9.40854e-116
Q0060	Q0060	Q0060	CDS	AI3	0	0
YBR091C	YBR091C	YBR091C	CDS	TIM12	431.856	497.619	-0.205278	0.0960013	-2.13829	0.0324933	0.0486981
YNL094W	YNL094W	YNL094W	CDS	APP1	4166.99	3505.22	0.249262	0.0393621	6.33254	2.41154e-10	7.06171e-10
YGL056C	YGL056C	YGL056C	CDS	SDS23	7773.8	9694.79	-0.319013	0.0410411	-7.77302	7.66381e-15	2.87609e-14
YPL227C	YPL227C	YPL227C	CDS	ALG5	556.065	649.383	-0.225371	0.0995195	-2.26459	0.0235376	0.036026
YLR222C-A	YLR222C-A	YLR222C-A	CDS	YLR222C-A	516.032	322.644	0.673949	0.122053	5.52175	3.35634e-08	8.71724e-08
YDL010W	YDL010W	YDL010W	CDS	GRX6	2883.29	2404.71	0.262216	0.0518255	5.0596	4.20145e-07	1.01603e-06
YML019W	YML019W	YML019W	CDS	OST6	714.899	913.085	-0.353085	0.0823443	-4.2879	1.80368e-05	3.84168e-05
YDL045C	YDL045C	YDL045C	CDS	FAD1	1748.41	2073.59	-0.246893	0.0522081	-4.72902	2.25609e-06	5.18306e-06
YLR163C	YLR163C	YLR163C	CDS	MAS1	4676.77	2857.37	0.710757	0.0511826	13.8867	7.62729e-44	7.23764e-43
YPR071W	YPR071W	YPR071W	CDS	YPR071W	365.772	499.584	-0.44811	0.100429	-4.46196	8.12124e-06	1.78249e-05
YAR029W	YAR029W	YAR029W	CDS	YAR029W	563.324	80.9346	2.78935	0.152451	18.2967	8.79107e-75	1.53877e-73
YAR030C	YAR030C	YAR030C	CDS	YAR030C	88.2185	44.1701	1.00459	0.271033	3.70654	0.000210106	0.000410341
YAR031W	YAR031W	YAR031W	CDS	PRM9	571.374	168.788	1.75393	0.12231	14.34	1.23128e-46	1.2646e-45
YBL079W	YBL079W	YBL079W	CDS	NUP170	2875.11	2869.87	0.00171196	0.0467731	0.0366015	0.970803	0.983051
YNL056W	YNL056W	YNL056W	CDS	OCA2	1841.03	1763.23	0.0616367	0.0563919	1.09301	0.274391	0.346725
YFL001W	YFL001W	YFL001W	CDS	DEG1	1314.29	1302.22	0.0138787	0.058058	0.239049	0.811068	0.860735
YDR150W	YDR150W	YDR150W	CDS	NUM1	10140.6	13544.1	-0.417685	0.030359	-13.7582	4.54751e-43	4.17343e-42
YMR167W	YMR167W	YMR167W	CDS	MLH1	1260.38	1303.44	-0.0507417	0.0675358	-0.75133	0.452454	0.537039
YKL125W	YKL125W	YKL125W	CDS	RRN3	1188.11	1116	0.0898179	0.0654995	1.37128	0.170289	0.226619
YKL170W	YKL170W	YKL170W	CDS	MRPL38	1348.82	2585.46	-0.9378	0.0648532	-14.4604	2.15674e-47	2.27877e-46
YPR157W	YPR157W	YPR157W	CDS	TDA6	383.417	405.147	-0.0796628	0.118864	-0.670201	0.50273	0.587429
YAR035C-A	YAR035C-A	YAR035C-A	CDS	YAR035C-A	6.15762	1.42448	2.13762	1.10385	1.93651	0.052805	0.0769435
YPR137C-A	YPR137C-A	YPR137C-A	CDS	YPR137C-A	6.43223	5.90881	0.161223	0.853189	0.188965	0.85012	0.887878
YLR384C	YLR384C	YLR384C	CDS	IKI3	5831.87	4038.56	0.52969	0.038403	13.7929	2.81154e-43	2.6216e-42
YDR307W	YDR307W	YDR307W	CDS	PMT7	891.999	1042.63	-0.226397	0.0656308	-3.44955	0.000561519	0.00105279
YML099C	YML099C	YML099C	CDS	ARG81	3324.5	2163.81	0.618245	0.0468314	13.2015	8.59898e-40	7.3778e-39
YAR035W	YAR035W	YAR035W	CDS	YAT1	41093.3	16598.9	1.3079	0.123166	10.619	2.43125e-26	1.43653e-25
YAR042W	YAR042W	YAR042W	CDS	SWH1	13800.3	5104.67	1.43471	0.0408861	35.0903	9.46284e-270	1.57354e-267
YAR050W	YAR050W	YAR050W	CDS	FLO1	2671.46	427.42	2.6455	0.081123	32.611	2.86139e-233	3.27606e-231
YJR064W	YJR064W	YJR064W	CDS	CCT5	2231.27	2520.66	-0.176371	0.0679078	-2.59721	0.00939834	0.0152292
YML022W	YML022W	YML022W	CDS	APT1	2218.67	2075.41	0.0968098	0.0586779	1.64985	0.0989734	0.13786
YER046W	YER046W	YER046W	CDS	SPO73	1022.86	1153.04	-0.175596	0.067303	-2.60903	0.0090799	0.014744
YMR029C	YMR029C	YMR029C	CDS	FAR8	2518.77	3089.03	-0.295755	0.0520931	-5.67744	1.36727e-08	3.63772e-08
YIR030C	YIR030C	YIR030C	CDS	DCG1	51.5492	69.9371	-0.445323	0.272894	-1.63185	0.10271	0.142667
YKR050W	YKR050W	YKR050W	CDS	TRK2	3808.98	2599.33	0.551616	0.0463819	11.8929	1.28851e-32	9.03512e-32
YMR121C	YMR121C	YMR121C	CDS	RPL15B	1752.38	1806.7	-0.0446832	0.0732033	-0.610399	0.541598	0.625934
YGL017W	YGL017W	YGL017W	CDS	ATE1	725.003	812.457	-0.165247	0.0816105	-2.02483	0.0428851	0.0632143
YDL150W	YDL150W	YDL150W	CDS	RPC53	1115.56	1337.96	-0.262633	0.0687982	-3.81743	0.000134848	0.000267854
YNL038W	YNL038W	YNL038W	CDS	GPI15	606.285	846.768	-0.48045	0.0826947	-5.80993	6.24986e-09	1.69577e-08
YHR001W-A	YHR001W-A	YHR001W-A	CDS	QCR10	11652.9	18531.3	-0.669273	0.0457703	-14.6224	2.02104e-48	2.1816e-47
YAR064W	YAR064W	YAR064W	CDS	YAR064W	6.84849	1.46628	2.24841	1.50179	1.49716	0.134352	0.183014
YIL139C	YIL139C	YIL139C	CDS	REV7	453.198	366.188	0.307006	0.100413	3.05742	0.00223249	0.00390778
YLR246W	YLR246W	YLR246W	CDS	ERF2	2969.81	1540.18	0.948005	0.0550259	17.2283	1.62739e-66	2.42857e-65
YJR119C	YJR119C	YJR119C	CDS	JHD2	439.212	435.704	0.0155042	0.121232	0.127889	0.898237	0.927178
YLR359W	YLR359W	YLR359W	CDS	ADE13	7961.85	7158.01	0.153541	0.0445528	3.44628	0.00056837	0.00106478
YLR199C	YLR199C	YLR199C	CDS	PBA1	2303.6	1746.08	0.400614	0.0650197	6.16143	7.20917e-10	2.05757e-09
YJL206C	YJL206C	YJL206C	CDS	YJL206C	1281.26	1168.77	0.133406	0.055827	2.38963	0.0168656	0.026422
YIL142W	YIL142W	YIL142W	CDS	CCT2	4622.35	4249.83	0.121516	0.0452436	2.68581	0.00723552	0.0118845
YGL082W	YGL082W	YGL082W	CDS	YGL082W	1827.88	1780.09	0.0390653	0.0538217	0.725827	0.467945	0.552982
YNL138W	YNL138W	YNL138W	CDS	SRV2	4899.5	7584.65	-0.630517	0.0406179	-15.5231	2.41929e-54	2.9747e-53
YDL236W	YDL236W	YDL236W	CDS	PHO13	1346.38	1928.71	-0.518716	0.0628904	-8.24794	1.6115e-16	6.57019e-16
YGL142C	YGL142C	YGL142C	CDS	GPI10	1446.51	1103.38	0.391357	0.0686576	5.70012	1.1972e-08	3.20476e-08
YGR179C	YGR179C	YGR179C	CDS	OKP1	661.788	950.466	-0.522556	0.0783553	-6.66906	2.57442e-11	8.02309e-11
YJR086W	YJR086W	YJR086W	CDS	STE18	1139.38	1580.7	-0.473089	0.0788623	-5.99893	1.98628e-09	5.54887e-09
YBR139W	YBR139W	YBR139W	CDS	YBR139W	7719.72	8567.74	-0.150434	0.0365153	-4.11974	3.79294e-05	7.88201e-05
YHR188C	YHR188C	YHR188C	CDS	GPI16	4534.31	4392.26	0.0465309	0.0384263	1.21091	0.225929	0.291931
YKL106C-A	YKL106C-A	YKL106C-A	CDS	YKL106C-A	8.9347	4.87472	0.882073	0.935954	0.942433	0.345971	0.424576
YNL116W	YNL116W	YNL116W	CDS	DMA2	1960.94	2068.33	-0.0750853	0.057526	-1.30524	0.191811	0.251948
YNL139C	YNL139C	YNL139C	CDS	THO2	3097.03	2334.12	0.407207	0.0481445	8.45801	2.71977e-17	1.14842e-16
YDR361C	YDR361C	YDR361C	CDS	BCP1	764.897	1119.55	-0.54949	0.0826509	-6.64832	2.96449e-11	9.20588e-11
YNL005C	YNL005C	YNL005C	CDS	MRP7	4152.04	4971.3	-0.260411	0.0384247	-6.77719	1.22536e-11	3.87938e-11
YAR066W	YAR066W	YAR066W	CDS	YAR066W	6.19727	1.11769	2.52314	1.65131	1.52796	0.126522	0.173023
YGL255W	YGL255W	YGL255W	CDS	ZRT1	2880.08	5377	-0.900422	0.0503132	-17.8963	1.25915e-71	2.08881e-70
YFR007W	YFR007W	YFR007W	CDS	YFH7	699.952	898.65	-0.360404	0.0666252	-5.40943	6.32272e-08	1.62166e-07
YAR068W	YAR068W	YAR068W	CDS	YAR068W	13.4884	3.97407	1.74177	0.911034	1.91186	0.0558944	0.0811573
YHL030W	YHL030W	YHL030W	CDS	ECM29	2079.39	1280.86	0.699143	0.0661268	10.5728	3.98599e-26	2.3315e-25
YBR294W	YBR294W	YBR294W	CDS	SUL1	193.961	348.07	-0.839577	0.114023	-7.36319	1.79564e-13	6.32733e-13
YGL077C	YGL077C	YGL077C	CDS	HNM1	2262.99	4116.68	-0.862434	0.0471797	-18.2798	1.19891e-74	2.09329e-73
YPL204W	YPL204W	YPL204W	CDS	HRR25	5134.45	4763.25	0.107602	0.0393529	2.73428	0.00625177	0.0103736
YLR379W	YLR379W	YLR379W	CDS	YLR379W	24.0633	12.6894	0.91958	0.472897	1.94457	0.0518269	0.0755971
YIL009C-A	YIL009C-A	YIL009C-A	CDS	EST3	604.231	623.184	-0.0409007	0.0836043	-0.489217	0.624688	0.701918
tE%28CUC%29I	tE%28CUC%29I	tE%28CUC%29I	noncoding_exon	tE%28CUC%29I	0.949717	1.00397	-0.0753891	2.46653	-0.0305648	0.975617	0.986457
YBR302C	YBR302C	YBR302C	CDS	COS2	63.7958	83.165	-0.382112	0.235711	-1.6211	0.104996	0.145532
YOR091W	YOR091W	YOR091W	CDS	TMA46	1883.43	2149.98	-0.189405	0.0558426	-3.39177	0.000694439	0.00128612
YGR026W	YGR026W	YGR026W	CDS	YGR026W	2757.03	4172.68	-0.598918	0.0442965	-13.5207	1.18123e-41	1.05092e-40
YAL040C	YAL040C	YAL040C	CDS	CLN3	3598.51	2877.07	0.322595	0.0434279	7.42828	1.10018e-13	3.92225e-13
YDR288W	YDR288W	YDR288W	CDS	NSE3	1081.68	1046.32	0.0489833	0.0703066	0.696709	0.485985	0.570344
YGL208W	YGL208W	YGL208W	CDS	SIP2	5998.38	4942.9	0.279303	0.0397119	7.03322	2.01819e-12	6.69597e-12
YNL284C	YNL284C	YNL284C	CDS	MRPL10	2093.39	3224.24	-0.624292	0.0513332	-12.1616	4.97923e-34	3.64518e-33
YIL164C	YIL164C	YIL164C	CDS	NIT1	713.749	535.49	0.416012	0.0814098	5.11009	3.22003e-07	7.85495e-07
YAR070C	YAR070C	YAR070C	CDS	YAR070C	0	2.10383	-3.52686	2.80057	-1.25934	0.207909	0.270901
YBR237W	YBR237W	YBR237W	CDS	PRP5	2414.94	2058.29	0.2309	0.0482139	4.78907	1.67557e-06	3.87746e-06
YBR197C	YBR197C	YBR197C	CDS	YBR197C	1008.05	924.275	0.126444	0.0794435	1.59163	0.111469	0.154005
YCR076C	YCR076C	YCR076C	CDS	FUB1	1792.68	1822.92	-0.0225965	0.0613119	-0.368551	0.712463	0.776626
YHR147C	YHR147C	YHR147C	CDS	MRPL6	2189.7	3747.05	-0.776564	0.0477438	-16.2652	1.74218e-59	2.3672e-58
YJL093C	YJL093C	YJL093C	CDS	TOK1	2826.83	2170.41	0.381015	0.0544953	6.99171	2.71553e-12	8.93325e-12
YPL126W	YPL126W	YPL126W	CDS	NAN1	1647.8	2284.25	-0.472541	0.0525845	-8.98632	2.55658e-19	1.1693e-18
YAR071W	YAR071W	YAR071W	CDS	PHO11	59.39	131.208	-1.13876	0.199903	-5.69657	1.22243e-08	3.2673e-08
YOR251C	YOR251C	YOR251C	CDS	TUM1	1671.56	2568.06	-0.617908	0.0560696	-11.0204	3.04795e-28	1.90743e-27
YPR181C	YPR181C	YPR181C	CDS	SEC23	5200.86	4697.51	0.147415	0.0497254	2.96457	0.00303103	0.00522041
YCL008C	YCL008C	YCL008C	CDS	STP22	3607.06	3362.61	0.102042	0.0695978	1.46616	0.142605	0.193089
YOR107W	YOR107W	YOR107W	CDS	RGS2	769.736	458.345	0.747339	0.0944331	7.91395	2.49345e-15	9.53159e-15
YML005W	YML005W	YML005W	CDS	TRM12	1326.16	1128.33	0.233148	0.0655365	3.55754	0.000374346	0.000714521
YNL215W	YNL215W	YNL215W	CDS	IES2	3433.91	3410.57	0.00908423	0.0489132	0.185721	0.852663	0.889736
YCR075W-A	YCR075W-A	YCR075W-A	CDS	YCR075W-A	453.708	509.673	-0.16655	0.108316	-1.53763	0.124139	0.170097
YDL059C	YDL059C	YDL059C	CDS	RAD59	581.675	527.326	0.141967	0.0980275	1.44823	0.147552	0.199131
YOR204W	YOR204W	YOR204W	CDS	DED1	2548.74	1638.25	0.637724	0.0570201	11.1842	4.87279e-29	3.09941e-28
YEL012W	YEL012W	YEL012W	CDS	UBC8	8815.79	9507.02	-0.1093	0.0382859	-2.85483	0.00430602	0.00729225
YBL040C	YBL040C	YBL040C	CDS	ERD2	2362.37	2090.52	0.176579	0.0497688	3.54799	0.000388186	0.000739726
YPR043W	YPR043W	YPR043W	CDS	RPL43A	9110.92	6357.33	0.519387	0.0974909	5.32754	9.95499e-08	2.51449e-07
YDR382W	YDR382W	YDR382W	CDS	RPP2B	8436.98	7535.76	0.16313	0.0545845	2.98858	0.00280277	0.00484518
YDR483W	YDR483W	YDR483W	CDS	KRE2	8929.9	9873.46	-0.145225	0.0342698	-4.23771	2.25816e-05	4.76609e-05
YER061C	YER061C	YER061C	CDS	CEM1	2336.56	2226.38	0.0700499	0.0511451	1.36963	0.170803	0.227173
YLR022C	YLR022C	YLR022C	CDS	SDO1	863.746	439.433	0.973889	0.0970072	10.0393	1.0235e-23	5.5541e-23
YLR402W	YLR402W	YLR402W	CDS	YLR402W	97.4125	54.1703	0.855055	0.2545	3.35975	0.000780139	0.0014376
YAR075W	YAR075W	YAR075W	CDS	YAR075W	42.0081	16.9427	1.29901	0.498189	2.60746	0.00912174	0.0148016
YER183C	YER183C	YER183C	CDS	FAU1	943.866	993.888	-0.0751104	0.0687921	-1.09185	0.2749	0.34718
YHR090C	YHR090C	YHR090C	CDS	YNG2	1972.09	2152.98	-0.126705	0.0595424	-2.12799	0.0333381	0.0499107
YOL021C	YOL021C	YOL021C	CDS	DIS3	1719.17	1949.38	-0.181672	0.0551221	-3.2958	0.00098142	0.00179336
YHR030C	YHR030C	YHR030C	CDS	SLT2	4889.95	2912.21	0.747567	0.0490051	15.2549	1.52771e-52	1.79924e-51
YBR295W	YBR295W	YBR295W	CDS	PCA1	2627.84	1387.25	0.920659	0.0530522	17.3538	1.84489e-67	2.80713e-66
YKL018W	YKL018W	YKL018W	CDS	SWD2	781.721	745.013	0.0711447	0.071305	0.997752	0.3184	0.395677
YIL011W	YIL011W	YIL011W	CDS	TIR3	514.71	450.423	0.196334	0.112078	1.75176	0.0798154	0.112977
YEL034W	YEL034W	YEL034W	CDS	HYP2	19312.8	26613.1	-0.46247	0.0279271	-16.5599	1.35865e-61	1.91306e-60
YHL015W	YHL015W	YHL015W	CDS	RPS20	18417.8	11704	0.654089	0.0448269	14.5914	3.18384e-48	3.42619e-47
YNR050C	YNR050C	YNR050C	CDS	LYS9	1228.7	1841.05	-0.583804	0.0599887	-9.73189	2.2045e-22	1.13458e-21
YKL208W	YKL208W	YKL208W	CDS	CBT1	856.695	961.629	-0.165221	0.0756731	-2.18335	0.0290099	0.043854
YGR004W	YGR004W	YGR004W	CDS	PEX31	550.341	526.788	0.0625559	0.0961422	0.65066	0.515266	0.60007
YML110C	YML110C	YML110C	CDS	COQ5	10887.8	16436.8	-0.594508	0.0309249	-19.2242	2.31993e-82	4.61606e-81
YGL048C	YGL048C	YGL048C	CDS	RPT6	7982.24	7386.12	0.111892	0.0388104	2.88304	0.00393859	0.00669924
YGL243W	YGL243W	YGL243W	CDS	TAD1	715.134	841.753	-0.235544	0.0798683	-2.94916	0.00318643	0.00547184
YKL106W	YKL106W	YKL106W	CDS	AAT1	619.993	444.647	0.482216	0.0934753	5.15875	2.486e-07	6.10486e-07
YPR029C	YPR029C	YPR029C	CDS	APL4	2315.73	2396.52	-0.0495744	0.0482281	-1.02792	0.30399	0.379661
YBL005W-A	YBL005W-A	YBL005W-A	CDS	YBL005W-A	168.945	1134.91	-2.7475	1.75441	-1.56606	0.117336	0.16144
YFL048C	YFL048C	YFL048C	CDS	EMP47	1845.62	2459.25	-0.412382	0.0539682	-7.64121	2.15187e-14	7.914e-14
YBL005W-B	YBL005W-B	YBL005W-B	CDS	YBL005W-B	1752.76	4142.97	-1.2416	0.198422	-6.25735	3.91569e-10	1.13899e-09
YOR176W	YOR176W	YOR176W	CDS	HEM15	2497.72	3797.8	-0.603496	0.0480729	-12.5538	3.79094e-36	2.94504e-35
YOR109W	YOR109W	YOR109W	CDS	INP53	2245.09	2389.6	-0.0906752	0.0498687	-1.81828	0.0690214	0.0986383
YBL089W	YBL089W	YBL089W	CDS	AVT5	1014.79	853.072	0.250383	0.0634702	3.94489	7.98355e-05	0.000161615
YDL084W	YDL084W	YDL084W	CDS	SUB2	7252.91	9121.31	-0.331014	0.0415365	-7.96923	1.59669e-15	6.17459e-15
YCL055W	YCL055W	YCL055W	CDS	KAR4	693.403	1077.24	-0.633395	0.0729421	-8.68352	3.83706e-18	1.66447e-17
YBL029W	YBL029W	YBL029W	CDS	YBL029W	1026.4	2578.84	-1.32747	0.0639503	-20.7578	1.04238e-95	2.60931e-94
YBL054W	YBL054W	YBL054W	CDS	TOD6	1604.64	1451.22	0.144379	0.062217	2.32058	0.0203096	0.0313395
YCR024C	YCR024C	YCR024C	CDS	SLM5	918.509	910.355	0.010656	0.068701	0.155107	0.876737	0.909391
tF%28GAA%29P2	tF%28GAA%29P2	tF%28GAA%29P2	noncoding_exon	tF%28GAA%29P2	0	0
YMR102C	YMR102C	YMR102C	CDS	YMR102C	1774.43	975.072	0.862301	0.070702	12.1963	3.25373e-34	2.40466e-33
YCR071C	YCR071C	YCR071C	CDS	IMG2	1624.18	2165.99	-0.415039	0.0591569	-7.0159	2.28479e-12	7.56614e-12
tK%28CUU%29D2	tK%28CUU%29D2	tK%28CUU%29D2	noncoding_exon	tK%28CUU%29D2	0	0
YBL042C	YBL042C	YBL042C	CDS	FUI1	3866.09	1279.77	1.59698	0.0575708	27.7394	2.33971e-169	1.4855e-167
YDR175C	YDR175C	YDR175C	CDS	RSM24	2171.16	3626.3	-0.739907	0.0407095	-18.1753	8.10214e-74	1.3869e-72
YOR189W	YOR189W	YOR189W	CDS	IES4	852.077	1155.26	-0.441036	0.0676184	-6.52243	6.91769e-11	2.10331e-10
YOR154W	YOR154W	YOR154W	CDS	SLP1	855.436	1375.62	-0.68865	0.0792701	-8.68739	3.70847e-18	1.60969e-17
YPR121W	YPR121W	YPR121W	CDS	THI22	480.683	458.759	0.0650571	0.1161	0.560353	0.575239	0.658062
YBR070C	YBR070C	YBR070C	CDS	ALG14	1427.62	1236.88	0.20784	0.0762005	2.72754	0.00638079	0.0105651
YOR396C-A	YOR396C-A	YOR396C-A	CDS	YOR396C-A	0	0
YBL053W	YBL053W	YBL053W	CDS	YBL053W	8.42423	21.2482	-1.35882	0.736825	-1.84416	0.0651596	0.0935406
YNL315C	YNL315C	YNL315C	CDS	ATP11	2272.58	3489.96	-0.618686	0.04437	-13.9438	3.43244e-44	3.29741e-43
YPR174C	YPR174C	YPR174C	CDS	YPR174C	792.125	699.232	0.180667	0.0858221	2.10513	0.0352798	0.052637
YJR045C	YJR045C	YJR045C	CDS	SSC1	23035.8	32184.7	-0.482418	0.0401941	-12.0022	3.45967e-33	2.46053e-32
YMR008C	YMR008C	YMR008C	CDS	PLB1	12022.3	12035.8	-0.00148426	0.0504716	-0.0294078	0.976539	0.98714
YPL026C	YPL026C	YPL026C	CDS	SKS1	3423.47	3358.43	0.0271623	0.0422676	0.642626	0.520467	0.604714
YDL171C	YDL171C	YDL171C	CDS	GLT1	6278.54	10098.5	-0.685494	0.0562089	-12.1955	3.286e-34	2.42595e-33
YKL062W	YKL062W	YKL062W	CDS	MSN4	2277.3	3549.85	-0.639675	0.0453134	-14.1167	2.99783e-45	2.95718e-44
YJR010W	YJR010W	YJR010W	CDS	MET3	781.709	1033.92	-0.401639	0.0732984	-5.47951	4.26508e-08	1.10364e-07
YJL218W	YJL218W	YJL218W	CDS	YJL218W	370.816	396.498	-0.0964381	0.127055	-0.759027	0.447836	0.533098
YIL126W	YIL126W	YIL126W	CDS	STH1	3064.84	3299.19	-0.107197	0.0499963	-2.1441	0.0320248	0.0480666
YDR093W	YDR093W	YDR093W	CDS	DNF2	3493.59	2322.48	0.590929	0.0587353	10.0609	8.22594e-24	4.47778e-23
YMR282C	YMR282C	YMR282C	CDS	AEP2	1446	1611.79	-0.156806	0.0575467	-2.72484	0.00643327	0.0106469
YIL109C	YIL109C	YIL109C	CDS	SEC24	5213.29	4206.7	0.309444	0.0449861	6.87865	6.04213e-12	1.94731e-11
YFL022C	YFL022C	YFL022C	CDS	FRS2	3381.02	3873.77	-0.195865	0.0585233	-3.34679	0.000817538	0.00150374
YPL109C	YPL109C	YPL109C	CDS	YPL109C	1571.66	2460.37	-0.647858	0.0468013	-13.8428	1.40713e-43	1.32445e-42
YJL156C	YJL156C	YJL156C	CDS	SSY5	1497.55	1800.21	-0.266019	0.0562983	-4.72517	2.2992e-06	5.2769e-06
YNL071W	YNL071W	YNL071W	CDS	LAT1	16795.7	22660.1	-0.431778	0.0408364	-10.5734	3.96083e-26	2.31873e-25
YMR088C	YMR088C	YMR088C	CDS	VBA1	2135.72	2505.56	-0.22943	0.0507976	-4.51656	6.28524e-06	1.3953e-05
YBL059C-A	YBL059C-A	YBL059C-A	CDS	CMC2	1536.57	3075.74	-1.00199	0.0603819	-16.5943	7.66666e-62	1.0817e-60
YKL139W	YKL139W	YKL139W	CDS	CTK1	1895.08	1780	0.0924646	0.0540745	1.70995	0.0872753	0.122716
YJL069C	YJL069C	YJL069C	CDS	UTP18	690.344	673.129	0.0339948	0.094778	0.358678	0.719836	0.782952
YDR323C	YDR323C	YDR323C	CDS	PEP7	455.898	529.519	-0.218363	0.108242	-2.01736	0.0436577	0.0642311
YBL065W	YBL065W	YBL065W	CDS	YBL065W	97.4688	24.2961	2.01883	0.266084	7.58719	3.26918e-14	1.19102e-13
YHR042W	YHR042W	YHR042W	CDS	NCP1	8157.68	8149.17	0.00205632	0.0456866	0.0450092	0.9641	0.978674
YJL016W	YJL016W	YJL016W	CDS	YJL016W	3390.88	3134.42	0.11334	0.0471169	2.40552	0.0161496	0.0253767
YDR444W	YDR444W	YDR444W	CDS	YDR444W	1744.3	1669.56	0.0639449	0.0546294	1.17052	0.241791	0.310246
YPL189W	YPL189W	YPL189W	CDS	GUP2	147.198	163.271	-0.152443	0.168031	-0.907229	0.364286	0.444319
YLR285W	YLR285W	YLR285W	CDS	NNT1	1512.58	766.706	0.980754	0.0719039	13.6398	2.32265e-42	2.10121e-41
YLR267W	YLR267W	YLR267W	CDS	BOP2	8052.64	4736.03	0.765413	0.0383975	19.9339	2.06759e-88	4.56964e-87
YDL219W	YDL219W	YDL219W	CDS	DTD1	277.924	410.302	-0.560561	0.129699	-4.32203	1.54602e-05	3.30803e-05
YNL017C	YNL017C	YNL017C	CDS	YNL017C	0.291269	0.348589	-0.0507912	2.51024	-0.0202336	0.983857	0.990949
YCR024C-A	YCR024C-A	YCR024C-A	CDS	PMP1	2618.78	5173.29	-0.981329	0.0447992	-21.905	2.32602e-106	6.79703e-105
YCR024C-B	YCR024C-B	YCR024C-B	CDS	YCR024C-B	7225.16	10583.3	-0.550472	0.0380434	-14.4696	1.88677e-47	1.99655e-46
YKR024C	YKR024C	YKR024C	CDS	DBP7	754.367	872.876	-0.211751	0.081065	-2.61211	0.00899857	0.0146194
YBR156C	YBR156C	YBR156C	CDS	SLI15	847.641	752.149	0.172679	0.0822884	2.09846	0.0358643	0.0534521
YOL013W-A	YOL013W-A	YOL013W-A	CDS	YOL013W-A	21.2333	29.3934	-0.460852	0.425971	-1.08189	0.279303	0.352357
YOR076C	YOR076C	YOR076C	CDS	SKI7	710.465	658.494	0.112103	0.084352	1.32899	0.183852	0.242635
YEL059C-A	YEL059C-A	YEL059C-A	CDS	SOM1	989.253	1016.95	-0.0381925	0.0818476	-0.46663	0.640765	0.716589
YDR405W	YDR405W	YDR405W	CDS	MRP20	4882.44	5463.94	-0.161543	0.0585131	-2.76081	0.00576584	0.00961525
YOL091W	YOL091W	YOL091W	CDS	SPO21	217.602	223.725	-0.0448813	0.138003	-0.325221	0.745014	0.804868
YCL031C	YCL031C	YCL031C	CDS	RRP7	2354.85	2480.61	-0.0746522	0.0630633	-1.18377	0.236505	0.304302
YIL027C	YIL027C	YIL027C	CDS	EMC5	1054.43	1529.53	-0.53794	0.0802669	-6.70189	2.05738e-11	6.43472e-11
YLR459W	YLR459W	YLR459W	CDS	GAB1	2004.01	1096.72	0.870494	0.0681065	12.7814	2.08376e-37	1.68242e-36
YNL144C	YNL144C	YNL144C	CDS	YNL144C	3479.54	2453.67	0.503513	0.0421907	11.9342	7.84903e-33	5.53155e-32
YNR026C	YNR026C	YNR026C	CDS	SEC12	591.882	703.068	-0.251987	0.101054	-2.49358	0.0126463	0.020197
YHL044W	YHL044W	YHL044W	CDS	YHL044W	620.177	538.146	0.203954	0.0806291	2.52953	0.0114215	0.0183206
YPR204W	YPR204W	YPR204W	CDS	YPR204W	233.513	194.543	0.265144	0.143693	1.84521	0.065007	0.0933599
YNL297C	YNL297C	YNL297C	CDS	MON2	2444.48	2433.97	0.00624058	0.0479947	0.130026	0.896545	0.925597
YHR068W	YHR068W	YHR068W	CDS	DYS1	1805.64	1978.29	-0.132699	0.0555351	-2.38947	0.0168729	0.0264259
YGR149W	YGR149W	YGR149W	CDS	YGR149W	2331.88	2249.54	0.0532526	0.0460617	1.15611	0.247635	0.316639
YDR458C	YDR458C	YDR458C	CDS	HEH2	1878.17	2359.39	-0.330017	0.0614915	-5.36687	8.01129e-08	2.0368e-07
YKL193C	YKL193C	YKL193C	CDS	SDS22	3210.76	5039.29	-0.649213	0.0479824	-13.5302	1.03698e-41	9.24937e-41
YPR099C	YPR099C	YPR099C	CDS	YPR099C	189.295	135.228	0.49496	0.137809	3.59163	0.000328621	0.000630691
YLR310C	YLR310C	YLR310C	CDS	CDC25	6875.05	5587.45	0.298838	0.0384265	7.77686	7.43452e-15	2.79154e-14
YNR008W	YNR008W	YNR008W	CDS	LRO1	1277.58	1072.75	0.252969	0.0694721	3.64131	0.000271254	0.000525212
YBL071C-B	YBL071C-B	YBL071C-B	CDS	YBL071C-B	3.91871	1.77307	1.17217	1.24122	0.944367	0.344982	0.423586
YLR003C	YLR003C	YLR003C	CDS	CMS1	1376.49	1029.92	0.417863	0.0740653	5.64181	1.68268e-08	4.43967e-08
YER113C	YER113C	YER113C	CDS	TMN3	811.371	1033.88	-0.351915	0.0678651	-5.1855	2.15438e-07	5.31667e-07
YHR122W	YHR122W	YHR122W	CDS	CIA2	999.235	1584.16	-0.668036	0.0658938	-10.1381	3.74425e-24	2.06392e-23
YHL017W	YHL017W	YHL017W	CDS	YHL017W	1262.49	1278.54	-0.0194607	0.0675932	-0.287909	0.773416	0.828203
YJR010C-A	YJR010C-A	YJR010C-A	CDS	SPC1	399.746	470.028	-0.232748	0.104155	-2.23463	0.0254413	0.0387161
YIL085C	YIL085C	YIL085C	CDS	KTR7	1879.26	1744.58	0.105205	0.0588869	1.78656	0.0740079	0.105291
YMR190C	YMR190C	YMR190C	CDS	SGS1	2417.35	1840.38	0.392673	0.0484025	8.11265	4.95285e-16	1.97548e-15
YCR052W	YCR052W	YCR052W	CDS	RSC6	2065.64	2106.31	-0.0282644	0.0625416	-0.45193	0.651319	0.725952
YOR272W	YOR272W	YOR272W	CDS	YTM1	809.805	1487.37	-0.876106	0.0790872	-11.0777	1.60932e-28	1.01439e-27
YOR058C	YOR058C	YOR058C	CDS	ASE1	1566.8	1624.32	-0.0517151	0.0609182	-0.848927	0.395922	0.478228
YER172C-A	YER172C-A	YER172C-A	CDS	YER172C-A	0.873806	1.11769	-0.256396	2.07909	-0.123321	0.901853	0.93017
YAL064W-B	YAL064W-B	YAL064W-B	CDS	YAL064W-B	136.647	89.2325	0.61088	0.205871	2.96729	0.00300437	0.00517832
YDR413C	YDR413C	YDR413C	CDS	YDR413C	5.86591	4.81509	0.292521	0.987349	0.296269	0.767025	0.823058
YBR203W	YBR203W	YBR203W	CDS	COS111	4150.14	2916.06	0.509671	0.0423119	12.0456	2.04654e-33	1.47047e-32
YBL073W	YBL073W	YBL073W	CDS	YBL073W	5.20406	0.745127	2.87183	1.48741	1.93076	0.0535125	0.0778769
YNL238W	YNL238W	YNL238W	CDS	KEX2	1933.08	1641.26	0.235004	0.0545243	4.31008	1.63195e-05	3.48763e-05
YBR271W	YBR271W	YBR271W	CDS	EFM2	686.686	827.279	-0.267175	0.0806563	-3.31251	0.000924625	0.00169401
YJL198W	YJL198W	YJL198W	CDS	PHO90	1704.5	1236.95	0.463425	0.0636487	7.28098	3.314e-13	1.15149e-12
YOL135C	YOL135C	YOL135C	CDS	MED7	1003.55	1144.34	-0.190084	0.0662118	-2.87084	0.00409384	0.0069464
YOR323C	YOR323C	YOR323C	CDS	PRO2	3323.31	3951.1	-0.24922	0.0518534	-4.80623	1.53801e-06	3.56859e-06
YLL041C	YLL041C	YLL041C	CDS	SDH2	26453.6	35767.7	-0.435184	0.0325818	-13.3567	1.08329e-40	9.45713e-40
YKR074W	YKR074W	YKR074W	CDS	AIM29	2218.51	2869.94	-0.373051	0.0603799	-6.1784	6.47529e-10	1.85494e-09
YMR274C	YMR274C	YMR274C	CDS	RCE1	392.577	360.53	0.124167	0.119575	1.0384	0.299084	0.374404
YER026C	YER026C	YER026C	CDS	CHO1	4007.86	7519.77	-0.907633	0.0408809	-22.2019	3.29193e-109	9.99602e-108
YMR201C	YMR201C	YMR201C	CDS	RAD14	2028.37	1604.04	0.338713	0.0618362	5.47759	4.31159e-08	1.11485e-07
YLR069C	YLR069C	YLR069C	CDS	MEF1	4874.59	5192.42	-0.0903254	0.0519348	-1.73921	0.0819982	0.11595
YML042W	YML042W	YML042W	CDS	CAT2	22512.2	19476.7	0.208856	0.0348419	5.99439	2.04253e-09	5.70145e-09
YBL107W-A	YBL107W-A	YBL107W-A	CDS	YBL107W-A	2.60181	0.348589	2.82697	2.06047	1.372	0.170062	0.226404
YDR069C	YDR069C	YDR069C	CDS	DOA4	1675.83	1662.88	0.011544	0.0530954	0.217419	0.827882	0.871297
YGR232W	YGR232W	YGR232W	CDS	NAS6	2399.57	2995.89	-0.318786	0.0460813	-6.9179	4.58381e-12	1.49038e-11
YBL111C	YBL111C	YBL111C	CDS	YBL111C	3.30419	1.39436	1.25209	1.66718	0.751025	0.452638	0.537166
YPR035W	YPR035W	YPR035W	CDS	GLN1	22838.7	27311.6	-0.257984	0.0305193	-8.45313	2.83607e-17	1.1968e-16
YDR014W	YDR014W	YDR014W	CDS	RAD61	697.657	604.605	0.202424	0.0833902	2.42743	0.015206	0.0239944
YDR227W	YDR227W	YDR227W	CDS	SIR4	2509.7	3085.41	-0.297923	0.0520238	-5.72666	1.02428e-08	2.75138e-08
YPR060C	YPR060C	YPR060C	CDS	ARO7	481.368	448.017	0.101598	0.119214	0.852238	0.394082	0.476584
YKR013W	YKR013W	YKR013W	CDS	PRY2	4205.1	7390.03	-0.813392	0.0583191	-13.9473	3.26915e-44	3.14487e-43
YBL112C	YBL112C	YBL112C	CDS	YBL112C	0.949717	0	2.34677	2.3897	0.982035	0.326082	0.403644
YOR157C	YOR157C	YOR157C	CDS	PUP1	3000.36	3241.89	-0.111318	0.0482044	-2.30929	0.0209276	0.0322361
YNL257C	YNL257C	YNL257C	CDS	SIP3	1217.25	2050.26	-0.753226	0.0621867	-12.1123	9.08706e-34	6.59024e-33
YCR072C	YCR072C	YCR072C	CDS	RSA4	490.94	604.071	-0.29815	0.0999308	-2.98357	0.00284909	0.0049216
YBL113W-A	YBL113W-A	YBL113W-A	CDS	YBL113W-A	3.89867	1.7909	1.15268	1.35705	0.849404	0.395657	0.478024
YBR004C	YBR004C	YBR004C	CDS	GPI18	3008.1	1493.43	1.00975	0.0498373	20.261	2.83899e-91	6.56539e-90
YNL092W	YNL092W	YNL092W	CDS	YNL092W	653.753	540.817	0.269933	0.0882896	3.05736	0.00223297	0.00390778
YGR045C	YGR045C	YGR045C	CDS	YGR045C	90.0966	111.076	-0.290765	0.184022	-1.58006	0.114094	0.157259
YML007C-A	YML007C-A	YML007C-A	CDS	YML007C-A	85.1493	70.2136	0.280738	0.239835	1.17055	0.241781	0.310246
YLR134W	YLR134W	YLR134W	CDS	PDC5	971.184	652.727	0.577447	0.0844187	6.84028	7.90386e-12	2.53214e-11
YBR005W	YBR005W	YBR005W	CDS	RCR1	3177.75	1473.35	1.10942	0.0604201	18.3618	2.65552e-75	4.69523e-74
YKL096C-B	YKL096C-B	YKL096C-B	CDS	YKL096C-B	31.9672	16.7557	0.928786	0.338155	2.74663	0.00602118	0.0100124
YPL225W	YPL225W	YPL225W	CDS	YPL225W	5465.53	7651.88	-0.485439	0.045786	-10.6024	2.90566e-26	1.70961e-25
YPL270W	YPL270W	YPL270W	CDS	MDL2	3833.1	5175.36	-0.432886	0.0461243	-9.3852	6.27971e-21	3.08205e-20
YDL012C	YDL012C	YDL012C	CDS	YDL012C	2125.27	1554.36	0.452538	0.0653058	6.92953	4.22252e-12	1.37675e-11
YBR006W	YBR006W	YBR006W	CDS	UGA2	3182.17	6511.87	-1.03227	0.048219	-21.4079	1.1283e-101	3.07813e-100
YBR038W	YBR038W	YBR038W	CDS	CHS2	828.972	2225.17	-1.42297	0.0658764	-21.6006	1.77224e-103	4.99084e-102
YJL177W	YJL177W	YJL177W	CDS	RPL17B	7427.54	4793.8	0.632154	0.0621471	10.1719	2.64703e-24	1.46257e-23
YEL049W	YEL049W	YEL049W	CDS	PAU2	457.194	442.68	0.0475079	0.0952666	0.498684	0.618002	0.695813
YGL139W	YGL139W	YGL139W	CDS	FLC3	1507.11	1568.45	-0.0556737	0.0587829	-0.947108	0.343584	0.422049
YNL054W	YNL054W	YNL054W	CDS	VAC7	1739.41	1632.66	0.0923188	0.0707567	1.30474	0.191983	0.252126
YDR156W	YDR156W	YDR156W	CDS	RPA14	1978.26	1407.75	0.492254	0.0825409	5.96376	2.46495e-09	6.83957e-09
YBR051W	YBR051W	YBR051W	CDS	YBR051W	26.9435	11.399	1.23581	0.52632	2.34802	0.0188734	0.0293568
YPR155C	YPR155C	YPR155C	CDS	NCA2	1347.77	2231.8	-0.730079	0.0540033	-13.5191	1.20568e-41	1.06995e-40
YOR137C	YOR137C	YOR137C	CDS	SIA1	1107.06	781.732	0.501173	0.0680552	7.36422	1.78192e-13	6.28532e-13
YKL123W	YKL123W	YKL123W	CDS	YKL123W	168.121	153.731	0.125195	0.154559	0.810015	0.417932	0.502208
YKL172W	YKL172W	YKL172W	CDS	EBP2	5435.98	7786.07	-0.518289	0.0674851	-7.68006	1.59013e-14	5.88525e-14
YNL336W	YNL336W	YNL336W	CDS	COS1	1307.04	1794.43	-0.458097	0.0617031	-7.42421	1.13457e-13	4.03866e-13
YDR305C	YDR305C	YDR305C	CDS	HNT2	764.978	1085.13	-0.505588	0.0841388	-6.00897	1.86703e-09	5.222e-09
YJL057C	YJL057C	YJL057C	CDS	IKS1	2483.77	2156.02	0.206353	0.045358	4.54943	5.37909e-06	1.19986e-05
YPR100W	YPR100W	YPR100W	CDS	MRPL51	2286.74	3745.71	-0.712172	0.0508513	-14.005	1.45266e-44	1.40908e-43
YDR358W	YDR358W	YDR358W	CDS	GGA1	2679.14	3601.97	-0.426429	0.0445168	-9.57906	9.7932e-22	4.9312e-21
YJL152W	YJL152W	YJL152W	CDS	YJL152W	58.7649	40.4924	0.536963	0.295903	1.81466	0.0695758	0.0993289
YLR096W	YLR096W	YLR096W	CDS	KIN2	3665.18	1866.42	0.973645	0.0564988	17.233	1.50116e-66	2.24499e-65
YIL104C	YIL104C	YIL104C	CDS	SHQ1	618.081	547.236	0.172593	0.0937592	1.84081	0.06565	0.0942057
YKR052C	YKR052C	YKR052C	CDS	MRS4	1206.27	1372.55	-0.186223	0.059383	-3.13597	0.00171289	0.00304398
YER040W	YER040W	YER040W	CDS	GLN3	1541.18	1371.15	0.168884	0.0559326	3.01942	0.00253262	0.00440105
YDL152W	YDL152W	YDL152W	CDS	YDL152W	4.40529	4.47818	-0.00544145	1.13628	-0.00478882	0.996179	0.998916
YGL015C	YGL015C	YGL015C	CDS	YGL015C	46.8727	27.286	0.782219	0.282371	2.77018	0.00560255	0.00935634
YDR225W	YDR225W	YDR225W	CDS	HTA1	13678.7	17406.5	-0.34766	0.0380221	-9.14364	6.03863e-20	2.82666e-19
YMR127C	YMR127C	YMR127C	CDS	SAS2	553.708	429.248	0.367179	0.100819	3.64197	0.000270556	0.00052415
YIL140W	YIL140W	YIL140W	CDS	AXL2	1373.99	1419.54	-0.0470921	1.38412	-0.034023
YOL163W	YOL163W	YOL163W	CDS	YOL163W	164.889	164.785	-0.00617903	0.160849	-0.0384151	0.969357	0.982154
YLR197W	YLR197W	YLR197W	CDS	NOP56	11663.7	6746.77	0.789492	0.0573206	13.7733	3.6912e-43	3.41177e-42
YBR213W	YBR213W	YBR213W	CDS	MET8	426.316	329.508	0.374525	0.109023	3.43529	0.000591915	0.00110681
YBR054W	YBR054W	YBR054W	CDS	YRO2	4645.96	16523.8	-1.83076	0.0469458	-38.9973	0	0
YJL204C	YJL204C	YJL204C	CDS	RCY1	883.606	828.355	0.093098	0.0812819	1.14537	0.252055	0.321879
YLR244C	YLR244C	YLR244C	CDS	MAP1	8576.92	5238.34	0.71165	0.0457857	15.5431	1.77319e-54	2.19185e-53
YBR056W-A	YBR056W-A	YBR056W-A	CDS	YBR056W-A	1961.05	428.382	2.19674	0.0974816	22.5349	1.88933e-112	6.05279e-111
YJR084W	YJR084W	YJR084W	CDS	YJR084W	1021.39	1268.54	-0.310638	0.0676226	-4.5937	4.3546e-06	9.78209e-06
YLR233C	YLR233C	YLR233C	CDS	EST1	1278.18	808.722	0.658981	0.0737505	8.93527	4.06177e-19	1.83965e-18
YDL238C	YDL238C	YDL238C	CDS	GUD1	1182.64	1167.54	0.018351	0.0586647	0.312812	0.754424	0.812725
YGL084C	YGL084C	YGL084C	CDS	GUP1	1682.53	2136.7	-0.344116	0.0552413	-6.22932	4.68457e-10	1.35194e-09
YML084W	YML084W	YML084W	CDS	YML084W	19.0511	13.6104	0.476241	0.481938	0.988179	0.323065	0.40069
YLR382C	YLR382C	YLR382C	CDS	NAM2	3045.45	2022.89	0.589179	0.0497056	11.8534	2.06719e-32	1.44228e-31
YBR064W	YBR064W	YBR064W	CDS	YBR064W	2.93744	7.23928	-1.38937	0.944943	-1.47032	0.141474	0.191744
YLR154C-G	YLR154C-G	YLR154C-G	CDS	YLR154C-G	1.98729	2.05588	-0.0507317	1.20143	-0.0422262	0.966318	0.979976
YBR072C-A	YBR072C-A	YBR072C-A	CDS	YBR072C-A	10.7668	4.3829	1.28381	0.826542	1.55323	0.120368	0.165157
YDR261W-A	YDR261W-A	YDR261W-A	CDS	YDR261W-A	18.8353	18.6063	0.00970239	0.424336	0.0228649	0.981758	0.989694
YDR363W	YDR363W	YDR363W	CDS	ESC2	1017.55	1187.31	-0.223205	0.0776667	-2.87388	0.00405466	0.0068816
YNL114C	YNL114C	YNL114C	CDS	YNL114C	45.1643	41.5222	0.122926	0.27608	0.445256	0.656135	0.729573
YNL163C	YNL163C	YNL163C	CDS	RIA1	1421.2	2213.2	-0.638885	0.0500843	-12.7562	2.87968e-37	2.30374e-36
YBR072W	YBR072W	YBR072W	CDS	HSP26	74279.1	202011	-1.44338	0.0330095	-43.7262	0	0
snR54	snR54	snR54	noncoding_exon	SNR54	16.4484	10.7534	0.631647	0.546291	1.15625	0.24758	0.316627
YFR005C	YFR005C	YFR005C	CDS	SAD1	485.349	492.162	-0.0159272	0.0968856	-0.164392	0.869423	0.904117
YBR092C	YBR092C	YBR092C	CDS	PHO3	1572.33	4941.11	-1.65161	0.0539684	-30.6033	1.10592e-205	1.00308e-203
snR51	snR51	snR51	noncoding_exon	SNR51	172.978	108.943	0.667371	0.183816	3.63064	0.000282716	0.000545438
snR50	snR50	snR50	noncoding_exon	SNR50	24.5771	17.3895	0.527265	0.356691	1.47821	0.139351	0.189197
snR53	snR53	snR53	noncoding_exon	SNR53	3.15236	2.44627	0.39508	1.24749	0.3167	0.751472	0.810169
snR52	snR52	snR52	noncoding_exon	SNR52	13.7673	12.6881	0.134077	0.580795	0.230851	0.817431	0.864202
snR59	snR59	snR59	noncoding_exon	SNR59	11.6922	9.74944	0.283486	0.531663	0.533207	0.59389	0.67377
snR58	snR58	snR58	noncoding_exon	SNR58	1.3169	2.16346	-0.69726	1.60642	-0.434046	0.664255	0.736258
YLR331C	YLR331C	YLR331C	CDS	JIP3	41.3505	32.1208	0.355544	0.376023	0.945537	0.344385	0.422927
YNR069C	YNR069C	YNR069C	CDS	BSC5	492.752	786.897	-0.676918	0.083739	-8.08366	6.28505e-16	2.48978e-15
YGR126W	YGR126W	YGR126W	CDS	YGR126W	272.853	349.448	-0.363759	0.110049	-3.30542	0.000948327	0.00173471
YBR093C	YBR093C	YBR093C	CDS	PHO5	1048.68	9838.81	-3.22755	0.0549549	-58.7308	0	0
YBR101C	YBR101C	YBR101C	CDS	FES1	8174.48	4027.03	1.02085	0.040858	24.9853	8.82337e-138	3.80385e-136
YGL071W	YGL071W	YGL071W	CDS	AFT1	2334.58	1739.83	0.424791	0.0507458	8.37097	5.71482e-17	2.37857e-16
YGL257C	YGL257C	YGL257C	CDS	MNT2	1063.53	1425.43	-0.422271	0.0625002	-6.7563	1.41556e-11	4.47139e-11
YGR020C	YGR020C	YGR020C	CDS	VMA7	3033.3	3677.03	-0.277347	0.0559133	-4.96031	7.0382e-07	1.67136e-06
YOR093C	YOR093C	YOR093C	CDS	YOR093C	1008.21	1383.54	-0.455725	0.0590025	-7.72383	1.12884e-14	4.21367e-14
YAL046C	YAL046C	YAL046C	CDS	AIM1	1183.78	1239.1	-0.0660043	0.077711	-0.849355	0.395684	0.478024
YDR198C	YDR198C	YDR198C	CDS	RKM2	623.291	837.846	-0.426932	0.0750856	-5.68594	1.30097e-08	3.46793e-08
YAL039C	YAL039C	YAL039C	CDS	CYC3	13009.3	8579.89	0.601066	0.0636255	9.44695	3.48862e-21	1.72921e-20
YDL185W	YDL185W	YDL185W	CDS	VMA1	16235.3	20613.3	-0.344341	0.0420113	-8.19639	2.47712e-16	1.00117e-15
YIL166C	YIL166C	YIL166C	CDS	YIL166C	532.949	271.668	0.971925	0.114882	8.46018	2.66957e-17	1.12791e-16
YLR403W	YLR403W	YLR403W	CDS	SFP1	2383.27	1287.42	0.888612	0.065267	13.615	3.25963e-42	2.93367e-41
YOL118C	YOL118C	YOL118C	CDS	YOL118C	42.128	26.5052	0.662394	0.324359	2.04217	0.0411351	0.0608145
YDR286C	YDR286C	YDR286C	CDS	YDR286C	354.237	435.411	-0.304866	0.118677	-2.56887	0.0102031	0.0164646
YHR141C	YHR141C	YHR141C	CDS	RPL42B	7007.43	5365.05	0.384885	0.0606838	6.34247	2.26105e-10	6.64052e-10
YPL128C	YPL128C	YPL128C	CDS	TBF1	665.659	639.406	0.0570132	0.0800946	0.711823	0.476575	0.560714
YGR136W	YGR136W	YGR136W	CDS	LSB1	6997.24	4860.97	0.526397	0.049315	10.6742	1.34437e-26	7.99068e-26
YJL091C	YJL091C	YJL091C	CDS	GWT1	862.71	969.378	-0.167975	0.0828912	-2.02645	0.0427185	0.0629821
YBR191W	YBR191W	YBR191W	CDS	RPL21A	7142.97	5021.09	0.508727	0.0615854	8.26051	1.4505e-16	5.9276e-16
tS%28GCU%29F	tS%28GCU%29F	tS%28GCU%29F	noncoding_exon	tS%28GCU%29F	0	0
YDR380W	YDR380W	YDR380W	CDS	ARO10	6127.24	4044.76	0.599033	0.0372764	16.07	4.13795e-58	5.48377e-57
YGL100W	YGL100W	YGL100W	CDS	SEH1	2479.03	2862.32	-0.207622	0.0532249	-3.90083	9.58622e-05	0.000193051
tS%28GCU%29O	tS%28GCU%29O	tS%28GCU%29O	noncoding_exon	tS%28GCU%29O	0	0
YGR047C	YGR047C	YGR047C	CDS	TFC4	1008.08	1239.58	-0.297308	0.0765776	-3.88245	0.000103411	0.000207058
YDR485C	YDR485C	YDR485C	CDS	VPS72	5122.62	4839.69	0.0820025	0.0568486	1.44247	0.149169	0.201003
YPL239W	YPL239W	YPL239W	CDS	YAR1	1276.53	1183.98	0.108161	0.0684917	1.57918	0.114295	0.157474
YPR183W	YPR183W	YPR183W	CDS	DPM1	5021.06	6152.43	-0.292869	0.0557878	-5.24969	1.52357e-07	3.79994e-07
YOR206W	YOR206W	YOR206W	CDS	NOC2	1918.81	3143.71	-0.712287	0.0628192	-11.3387	8.44074e-30	5.47864e-29
YBR103C-A	YBR103C-A	YBR103C-A	CDS	YBR103C-A	3.24022	1.49025	1.17549	1.48625	0.790909	0.428997	0.513913
YOR391C	YOR391C	YOR391C	CDS	HSP33	112.173	124.63	-0.150079	0.188814	-0.794853	0.426699	0.511511
YDR525W-A	YDR525W-A	YDR525W-A	CDS	SNA2	5692.33	4324.07	0.396367	0.0564297	7.02408	2.15488e-12	7.1461e-12
YBR089W	YBR089W	YBR089W	CDS	YBR089W	19.086	11.7678	0.721703	0.669187	1.07848	0.28082	0.353952
YLR075W	YLR075W	YLR075W	CDS	RPL10	33471.1	19600.9	0.77204	0.0375568	20.5566	6.71447e-94	1.61703e-92
YBR105C	YBR105C	YBR105C	CDS	VID24	3674.42	1562.32	1.23485	0.0469757	26.2869	2.706e-152	1.34991e-150
YBR114W	YBR114W	YBR114W	CDS	RAD16	3771.25	1724	1.12829	0.0459061	24.5782	2.16092e-133	8.82565e-132
YNL217W	YNL217W	YNL217W	CDS	YNL217W	1983.86	2944.47	-0.568491	0.0487591	-11.6592	2.0603e-31	1.39429e-30
YER067W	YER067W	YER067W	CDS	RGI1	29031.2	34827.6	-0.262508	0.0423312	-6.20127	5.60077e-10	1.60904e-09
YLR154W-A	YLR154W-A	YLR154W-A	CDS	YLR154W-A	7.7257	6.88454	0.142559	0.834125	0.170909	0.864296	0.899455
YIL013C	YIL013C	YIL013C	CDS	PDR11	1101.47	656.643	0.746832	0.082868	9.01231	2.01763e-19	9.30722e-19
YPL206C	YPL206C	YPL206C	CDS	PGC1	3869.05	5372.15	-0.472819	0.0426147	-11.0952	1.3232e-28	8.36311e-28
YDL060W	YDL060W	YDL060W	CDS	TSR1	1113.03	1628.1	-0.548617	0.061125	-8.97532	2.82517e-19	1.28876e-18
YBR293W	YBR293W	YBR293W	CDS	VBA2	857.802	988.164	-0.204436	0.0759652	-2.69118	0.00712001	0.0117003
YNR052C	YNR052C	YNR052C	CDS	POP2	1571.58	1787.67	-0.185221	0.0645895	-2.86767	0.00413511	0.00701301
YHR032W	YHR032W	YHR032W	CDS	ERC1	1893.28	1508.57	0.328785	0.0886406	3.7092	0.000207916	0.000406405
YEL032W	YEL032W	YEL032W	CDS	MCM3	1626.43	1687.84	-0.0528413	0.0642145	-0.822887	0.410572	0.494215
YOL076W	YOL076W	YOL076W	CDS	MDM20	480.053	644.57	-0.427092	0.0995948	-4.2883	1.80046e-05	3.83601e-05
YDR136C	YDR136C	YDR136C	CDS	VPS61	13.5758	7.1415	0.920945	0.590668	1.55916	0.118959	0.163416
YHR203C	YHR203C	YHR203C	CDS	RPS4B	7581.19	5718.22	0.407011	0.0498516	8.16446	3.22886e-16	1.29674e-15
YJL136W-A	YJL136W-A	YJL136W-A	CDS	YJL136W-A	2.03122	1.76692	0.205274	1.50581	0.136322	0.891567	0.921928
YML112W	YML112W	YML112W	CDS	CTK3	1658.1	1614.01	0.0385551	0.0561846	0.686221	0.492574	0.577107
YLR154W-C	YLR154W-C	YLR154W-C	CDS	TAR1	13.8036	8.68159	0.6474	0.614384	1.05374	0.292002	0.366459
YGL241W	YGL241W	YGL241W	CDS	KAP114	530.045	651.106	-0.299182	0.0887953	-3.36934	0.000753476	0.00138993
YDL071C	YDL071C	YDL071C	CDS	YDL071C	34.7294	36.2627	-0.0693157	0.302901	-0.228839	0.818994	0.864548
YPR176C	YPR176C	YPR176C	CDS	BET2	903.429	1319.22	-0.546844	0.0732483	-7.46563	8.29029e-14	2.96616e-13
YKL100C	YKL100C	YKL100C	CDS	YPF1	4909.37	5159.23	-0.0717112	0.0430354	-1.66633	0.0956478	0.133638
YJL036W	YJL036W	YJL036W	CDS	SNX4	3783.94	2894.7	0.385307	0.0518745	7.42768	1.10515e-13	3.93795e-13
YER009W	YER009W	YER009W	CDS	NTF2	3899.57	4891.6	-0.326363	0.0485698	-6.71946	1.82402e-11	5.7151e-11
YLR115W	YLR115W	YLR115W	CDS	CFT2	2044.89	1575.22	0.377349	0.0563027	6.70216	2.05367e-11	6.42601e-11
YLR140W	YLR140W	YLR140W	CDS	YLR140W	16.9683	9.51835	0.807382	0.652072	1.23818	0.21565	0.279996
YGL114W	YGL114W	YGL114W	CDS	YGL114W	2383	2770.18	-0.216692	0.0510304	-4.24633	2.17301e-05	4.59471e-05
YER167W	YER167W	YER167W	CDS	BCK2	4072.33	3012.57	0.434662	0.0433407	10.029	1.1371e-23	6.15622e-23
YMR104C	YMR104C	YMR104C	CDS	YPK2	10893.1	7518.36	0.534961	0.0393871	13.5821	5.11067e-42	4.58778e-41
YER185W	YER185W	YER185W	CDS	PUG1	188.545	101.553	0.890825	0.190174	4.68426	2.80975e-06	6.39195e-06
YDL195W	YDL195W	YDL195W	CDS	SEC31	7346.64	8788.58	-0.258111	0.0419429	-6.15388	7.56119e-10	2.15628e-09
YNL199C	YNL199C	YNL199C	CDS	GCR2	2408.53	2152.17	0.163588	0.0540221	3.02816	0.00246045	0.00428095
YCR026C	YCR026C	YCR026C	CDS	NPP1	2770.23	3259.35	-0.23473	0.0454271	-5.16719	2.3764e-07	5.83981e-07
YBL052C	YBL052C	YBL052C	CDS	SAS3	1400.94	1228.35	0.188523	0.0663314	2.84215	0.00448109	0.00756672
YJL125C	YJL125C	YJL125C	CDS	GCD14	1016.35	1436.71	-0.498084	0.0666531	-7.47278	7.85199e-14	2.81222e-13
YBR076W	YBR076W	YBR076W	CDS	ECM8	187.304	137.179	0.450601	0.179743	2.50692	0.0121789	0.0194952
YNL317W	YNL317W	YNL317W	CDS	PFS2	1387.94	1486.79	-0.0989696	0.0694463	-1.42512	0.154121	0.207156
YBR117C	YBR117C	YBR117C	CDS	TKL2	3149.39	8093.93	-1.36206	0.0491851	-27.6925	8.59897e-169	5.41038e-167
YOR156C	YOR156C	YOR156C	CDS	NFI1	912.838	735.613	0.310448	0.072634	4.27414	1.9188e-05	4.07445e-05
YHR052W	YHR052W	YHR052W	CDS	CIC1	956.688	1687.44	-0.817446	0.0664428	-12.303	8.72634e-35	6.58151e-34
YKR026C	YKR026C	YKR026C	CDS	GCN3	995.948	1209.31	-0.278505	0.068338	-4.07541	4.59338e-05	9.47156e-05
YJR043C	YJR043C	YJR043C	CDS	POL32	339.291	433.766	-0.355006	0.121037	-2.93303	0.00335669	0.00575715
YJR012C	YJR012C	YJR012C	CDS	YJR012C	596.976	725.786	-0.284114	0.107934	-2.63228	0.00848128	0.0138356
YBR124W	YBR124W	YBR124W	CDS	YBR124W	10.22	4.74932	1.08742	0.71882	1.51278	0.130336	0.177821
YCR044C	YCR044C	YCR044C	CDS	PER1	834.995	961.149	-0.203912	0.0773244	-2.6371	0.00836185	0.0136479
YDL177C	YDL177C	YDL177C	CDS	YDL177C	501.951	588.108	-0.224696	0.0965971	-2.32611	0.0200126	0.0309222
YBR131C-A	YBR131C-A	YBR131C-A	CDS	YBR131C-A	0.335195	0.745127	-1.05887	4.33965	-0.244	0.807231	0.857706
YNL073W	YNL073W	YNL073W	CDS	MSK1	2457.33	2381.55	0.0471044	0.048119	0.978915	0.327622	0.405263
YMR280C	YMR280C	YMR280C	CDS	CAT8	7538.69	6999.03	0.106686	0.0334557	3.18887	0.00142832	0.00255911
YBR172C	YBR172C	YBR172C	CDS	SMY2	5206.07	6477.53	-0.315255	0.0545325	-5.78104	7.42386e-09	2.00651e-08
YFL020C	YFL020C	YFL020C	CDS	PAU5	268.987	164.191	0.71503	0.14374	4.97448	6.54244e-07	1.55787e-06
YNL328C	YNL328C	YNL328C	CDS	MDJ2	135.636	160.944	-0.244812	0.16737	-1.4627	0.14355	0.194293
YJL014W	YJL014W	YJL014W	CDS	CCT3	3467.48	3860.01	-0.154671	0.0447649	-3.45518	0.000549917	0.00103159
YGR217W	YGR217W	YGR217W	CDS	CCH1	1663.73	1376.14	0.273839	0.0546419	5.01152	5.40007e-07	1.29379e-06
YOR174W	YOR174W	YOR174W	CDS	MED4	1009.55	1079.24	-0.0971947	0.0701794	-1.38495	0.166069	0.22151
YPR149W	YPR149W	YPR149W	CDS	NCE102	33295.9	29065.4	0.196129	0.0432795	4.53168	5.85158e-06	1.30234e-05
YBR138C	YBR138C	YBR138C	CDS	YBR138C	528.261	1185.18	-1.16381	0.0858383	-13.5581	7.09268e-42	6.35068e-41
YCR084C	YCR084C	YCR084C	CDS	TUP1	3630.19	4063.06	-0.161872	0.0469304	-3.44919	0.000562273	0.00105392
YHR178W	YHR178W	YHR178W	CDS	STB5	914.078	816.43	0.165447	0.0723234	2.2876	0.0221607	0.0340529
YBR182C	YBR182C	YBR182C	CDS	SMP1	1443.09	500.363	1.53091	0.0842395	18.1733	8.39458e-74	1.43344e-72
YJL127W-A	YJL127W-A	YJL127W-A	CDS	YJL127W-A	2.24657	2.42845	-0.0904092	1.28877	-0.0701514	0.944073	0.963948
YLR283W	YLR283W	YLR283W	CDS	YLR283W	1078.38	859.54	0.324355	0.0787167	4.12053	3.77996e-05	7.86605e-05
YPL170W	YPL170W	YPL170W	CDS	DAP1	2630.08	3255.49	-0.306093	0.0555932	-5.50593	3.67217e-08	9.52338e-08
YPR001W	YPR001W	YPR001W	CDS	CIT3	2764.54	2052.99	0.429114	0.0508659	8.43619	3.27843e-17	1.38014e-16
YDR204W	YDR204W	YDR204W	CDS	COQ4	3954.76	4337.07	-0.13212	0.0410447	-3.21892	0.00128673	0.00231612
YBR085C-A	YBR085C-A	YBR085C-A	CDS	YBR085C-A	12895.7	15738.7	-0.287338	0.0393501	-7.3021	2.83302e-13	9.8929e-13
YDR251W	YDR251W	YDR251W	CDS	PAM1	5383.89	3801.41	0.502064	0.0365946	13.7196	7.74663e-43	7.07222e-42
YNL048W	YNL048W	YNL048W	CDS	ALG11	1428.1	1923.72	-0.430179	0.0678193	-6.34302	2.25303e-10	6.62049e-10
YBR182C-A	YBR182C-A	YBR182C-A	CDS	YBR182C-A	9.20975	4.67551	1.01786	0.851454	1.19544	0.231914	0.298946
YOR074C	YOR074C	YOR074C	CDS	CDC21	616.465	1186.71	-0.941824	0.09197	-10.2406	1.30477e-24	7.28417e-24
YPL028W	YPL028W	YPL028W	CDS	ERG10	4700.48	6526.77	-0.473595	0.0534574	-8.85929	8.05255e-19	3.60507e-18
YJR152W	YJR152W	YJR152W	CDS	DAL5	995.691	980.356	0.021583	0.0701881	0.307502	0.758462	0.815853
YKL025C	YKL025C	YKL025C	CDS	PAN3	1732.52	1883.92	-0.120372	0.0482354	-2.49552	0.0125774	0.0200916
YAR008W	YAR008W	YAR008W	CDS	SEN34	489.328	397.042	0.300313	0.117304	2.56012	0.0104636	0.0168654
YBR158W	YBR158W	YBR158W	CDS	AMN1	2928.75	2697.99	0.116647	0.0438559	2.65978	0.0078192	0.0127884
YOL097C	YOL097C	YOL097C	CDS	WRS1	1557.17	1484.75	0.0705144	0.070909	0.994435	0.320011	0.397538
YNL122C	YNL122C	YNL122C	CDS	YNL122C	743.432	1086.91	-0.549936	0.0744781	-7.38387	1.53754e-13	5.4398e-13
YCL033C	YCL033C	YCL033C	CDS	MXR2	1986.96	2896.23	-0.542717	0.0756653	-7.17261	7.35826e-13	2.50806e-12
YNR020C	YNR020C	YNR020C	CDS	ATP23	576.66	909.928	-0.657675	0.0809837	-8.12107	4.62087e-16	1.84729e-15
YBR258C	YBR258C	YBR258C	CDS	SHG1	562.442	673.374	-0.263485	0.0865933	-3.04278	0.002344	0.00409262
YNL146W	YNL146W	YNL146W	CDS	YNL146W	159.839	192.095	-0.27098	0.146224	-1.85318	0.063856	0.0919148
YAL007C	YAL007C	YAL007C	CDS	ERP2	2236.54	1500.2	0.5759	0.0545034	10.5663	4.26946e-26	2.48897e-25
YLR262C-A	YLR262C-A	YLR262C-A	CDS	TMA7	4507.92	3769.25	0.258168	0.0529575	4.87501	1.08801e-06	2.54647e-06
YBR185C	YBR185C	YBR185C	CDS	MBA1	1106.95	2480.77	-1.16297	0.0605932	-19.1931	4.22567e-82	8.36035e-81
YBR223C	YBR223C	YBR223C	CDS	TDP1	1032.86	914.542	0.178493	0.0763769	2.337	0.0194391	0.0301093
YNL241C	YNL241C	YNL241C	CDS	ZWF1	15839.4	13483.5	0.232508	0.0400221	5.80949	6.26652e-09	1.69963e-08
YJL154C	YJL154C	YJL154C	CDS	VPS35	3505.64	3307.02	0.08353	0.0484768	1.72309	0.0848719	0.119654
YDR091C	YDR091C	YDR091C	CDS	RLI1	1182.56	1918.22	-0.697796	0.0606774	-11.5001	1.31777e-30	8.69876e-30
YNL182C	YNL182C	YNL182C	CDS	IPI3	745.559	842.206	-0.174623	0.102227	-1.70819	0.0876012	0.123125
YHR066W	YHR066W	YHR066W	CDS	SSF1	559.371	873.621	-0.643913	0.0856906	-7.5144	5.71738e-14	2.05932e-13
YPL047W	YPL047W	YPL047W	CDS	SGF11	348.006	368.757	-0.0876217	0.118142	-0.741663	0.458291	0.542769
YER086W	YER086W	YER086W	CDS	ILV1	2420.56	2737.23	-0.176957	0.0550013	-3.21732	0.00129395	0.00232792
YLR287C-A	YLR287C-A	YLR287C-A	CDS	RPS30A	21243.6	12126.6	0.808798	0.0526409	15.3645	2.8341e-53	3.40655e-52
RPR1	RPR1	RPR1	noncoding_exon	RPR1	1805.32	1342.33	0.428604	0.0887838	4.8275	1.38254e-06	3.21358e-06
YBR176W	YBR176W	YBR176W	CDS	ECM31	509.614	731.807	-0.521069	0.0794843	-6.55562	5.54099e-11	1.69804e-10
YBR191W-A	YBR191W-A	YBR191W-A	CDS	YBR191W-A	359.643	176.114	1.02485	0.140669	7.28552	3.20421e-13	1.1139e-12
YER147C-A	YER147C-A	YER147C-A	CDS	YER147C-A	3.59545	4.82677	-0.418039	0.976084	-0.428282	0.668446	0.739963
YPL036W	YPL036W	YPL036W	CDS	PMA2	624.477	1024.42	-0.712409	0.0831172	-8.57114	1.02469e-17	4.40667e-17
YGL238W	YGL238W	YGL238W	CDS	CSE1	2702.67	2336.47	0.209125	0.0498298	4.19678	2.70736e-05	5.67985e-05
YLR190W	YLR190W	YLR190W	CDS	MMR1	2806.25	3784.07	-0.432202	0.0508261	-8.50356	1.83864e-17	7.83947e-17
YNL128W	YNL128W	YNL128W	CDS	TEP1	234.383	156.934	0.579241	0.14188	4.08261	4.45326e-05	9.19348e-05
YDR322W	YDR322W	YDR322W	CDS	MRPL35	1987.56	3629.48	-0.869878	0.0434571	-20.0169	3.92143e-89	8.77798e-88
YKL191W	YKL191W	YKL191W	CDS	DPH2	1614.5	2096.67	-0.377461	0.0751491	-5.02282	5.09179e-07	1.22287e-06
YNR006W	YNR006W	YNR006W	CDS	VPS27	4296.24	3624.58	0.245994	0.0451245	5.45145	4.99605e-08	1.28802e-07
tP%28UGG%29N2	tP%28UGG%29N2	tP%28UGG%29N2	noncoding_exon	tP%28UGG%29N2	0	0
YHR120W	YHR120W	YHR120W	CDS	MSH1	452.466	487.455	-0.107666	0.0977517	-1.10143	0.270711	0.342571
YBR196C	YBR196C	YBR196C	CDS	PGI1	16599.7	33883.1	-1.02928	0.0495947	-20.7538	1.13291e-95	2.82579e-94
YOL137W	YOL137W	YOL137W	CDS	BSC6	929.217	1125.71	-0.27435	0.067114	-4.08782	4.35438e-05	9.00267e-05
YDR530C	YDR530C	YDR530C	CDS	APA2	5314.04	4391.3	0.275171	0.0440574	6.24574	4.21791e-10	1.22283e-09
YER111C	YER111C	YER111C	CDS	SWI4	1133.91	1330.18	-0.233024	0.0627037	-3.71627	0.000202184	0.000395977
YER144C	YER144C	YER144C	CDS	UBP5	3924.36	2660.31	0.562202	0.045623	12.3228	6.83077e-35	5.163e-34
YOL039W	YOL039W	YOL039W	CDS	RPP2A	8315.84	4840.24	0.781137	0.0639124	12.222	2.372e-34	1.76422e-33
YIL083C	YIL083C	YIL083C	CDS	CAB2	1602.69	3156.24	-0.978721	0.0510102	-19.1868	4.77234e-82	9.38874e-81
YHL011C	YHL011C	YHL011C	CDS	PRS3	2862.34	3138.93	-0.134481	0.0519345	-2.58944	0.00961308	0.0155556
YFR010W-A	YFR010W-A	YFR010W-A	CDS	YFR010W-A	4.78869	4.21934	0.181988	1.01307	0.179641	0.857435	0.893513
YOR008W-B	YOR008W-B	YOR008W-B	CDS	YOR008W-B	26.8924	29.3363	-0.130081	0.386644	-0.336436	0.736542	0.798512
YBR200W-A	YBR200W-A	YBR200W-A	CDS	YBR200W-A	1.62011	0.348589	2.1454	2.37799	0.902191	0.366955	0.447185
YPL060W	YPL060W	YPL060W	CDS	MFM1	765.589	909.878	-0.246879	0.0849523	-2.90608	0.00365983	0.00624792
YDR411C	YDR411C	YDR411C	CDS	DFM1	3070.11	2958.03	0.054517	0.0486174	1.12135	0.262139	0.333476
YBR223W-A	YBR223W-A	YBR223W-A	CDS	YBR223W-A	2.56983	0.920366	1.43538	1.99363	0.719985	0.471534	0.556387
YBR205W	YBR205W	YBR205W	CDS	KTR3	2100.59	2260.34	-0.106877	0.0565553	-1.88978	0.0587879	0.0850228
YOR321W	YOR321W	YOR321W	CDS	PMT3	1318.27	1502.13	-0.186835	0.0604056	-3.093	0.00198143	0.00349363
YMR186W	YMR186W	YMR186W	CDS	HSC82	23912.6	20009.1	0.257043	0.0548641	4.68508	2.79845e-06	6.36833e-06
YMR278W	YMR278W	YMR278W	CDS	PRM15	2736.38	2557.66	0.0980322	0.0558546	1.75513	0.0792367	0.112204
YML133W-B	YML133W-B	YML133W-B	CDS	YML133W-B	0	0	0	4.40736	0	1	1
YBR225W	YBR225W	YBR225W	CDS	YBR225W	810.651	40.311	4.33023	1.16898	3.70429
YML133W-A	YML133W-A	YML133W-A	CDS	YML133W-A	0	0
YBR296C	YBR296C	YBR296C	CDS	PHO89	10117	1639.48	2.62481	0.0541678	48.4571	0	0
YMR207C	YMR207C	YMR207C	CDS	HFA1	1950.93	1871.71	0.0599414	0.0536345	1.11759	0.263742	0.335149
YML015C	YML015C	YML015C	CDS	TAF11	1680.87	2405.77	-0.517325	0.0591705	-8.74295	2.27099e-18	9.95643e-18
YOR197W	YOR197W	YOR197W	CDS	MCA1	6309.68	7115.26	-0.173015	0.0427424	-4.04786	5.16891e-05	0.000106332
YKR089C	YKR089C	YKR089C	CDS	TGL4	5480.75	4702.37	0.220666	0.036298	6.0793	1.20707e-09	3.40476e-09
YDL041W	YDL041W	YDL041W	CDS	YDL041W	18.6681	12.2634	0.598344	0.499037	1.199	0.230529	0.297325
YKR072C	YKR072C	YKR072C	CDS	SIS2	5029.35	3718.59	0.435741	0.0400643	10.876	1.49931e-27	9.14513e-27
YDL014W	YDL014W	YDL014W	CDS	NOP1	4274.62	4464.82	-0.0622989	0.048431	-1.28634	0.198323	0.259429
YBR298C-A	YBR298C-A	YBR298C-A	CDS	YBR298C-A	2.98093	1.00397	1.55714	1.76503	0.88222	0.377658	0.458866
YDR260C	YDR260C	YDR260C	CDS	SWM1	566.139	552.078	0.0385519	0.0981746	0.392687	0.694551	0.761259
YER079W	YER079W	YER079W	CDS	YER079W	10456.5	8434.22	0.310094	0.0450325	6.88599	5.73873e-12	1.85124e-11
YER024W	YER024W	YER024W	CDS	YAT2	19879.3	18840.9	0.0774533	0.041153	1.88208	0.0598247	0.0864684
YCL023C	YCL023C	YCL023C	CDS	YCL023C	13.2163	4.70563	1.54198	0.702055	2.19638	0.0280647	0.0425171
YCL036W	YCL036W	YCL036W	CDS	GFD2	531.018	1452.64	-1.45351	0.0735996	-19.7489	8.20652e-87	1.76352e-85
YMR178W	YMR178W	YMR178W	CDS	YMR178W	2237.59	2344.6	-0.0686335	0.0536804	-1.27856	0.201053	0.262704
YPR037C	YPR037C	YPR037C	CDS	ERV2	2233.21	2930.32	-0.390949	0.060371	-6.47579	9.432e-11	2.82838e-10
YEL068C	YEL068C	YEL068C	CDS	YEL068C	432.117	662.128	-0.615468	0.102328	-6.01468	1.80247e-09	5.04546e-09
YNL090W	YNL090W	YNL090W	CDS	RHO2	451.74	554.911	-0.298154	0.102348	-2.91313	0.00357822	0.00611458
YOR307C	YOR307C	YOR307C	CDS	SLY41	2257.79	2087.41	0.113678	0.0473493	2.40084	0.0163573	0.0256717
YGL052W	YGL052W	YGL052W	CDS	YGL052W	0	0
YBR095C	YBR095C	YBR095C	CDS	RXT2	1355.59	1510.42	-0.156995	0.0615595	-2.5503	0.0107629	0.0173359
YDR524C	YDR524C	YDR524C	CDS	AGE1	1598.09	1558.84	0.0362953	0.0547246	0.663236	0.507179	0.591737
YGR043C	YGR043C	YGR043C	CDS	NQM1	9338.38	14000.9	-0.5842	0.0301521	-19.3751	1.25241e-83	2.55009e-82
YCL065W	YCL065W	YCL065W	CDS	YCL065W	1.73995	0	3.19252	2.32284	1.37441	0.169315	0.225538
YPL272C	YPL272C	YPL272C	CDS	PBI1	762.149	581.338	0.388836	0.0889802	4.36991	1.24296e-05	2.68115e-05
YPR002C-A	YPR002C-A	YPR002C-A	CDS	YPR002C-A	17.0677	10.3335	0.723363	0.529642	1.36576	0.172014	0.228567
YOL002C	YOL002C	YOL002C	CDS	IZH2	1917.41	2545.3	-0.409544	0.0556022	-7.36561	1.76336e-13	6.223e-13
Q0032	Q0032	Q0032	CDS	Q0032	39.0822	50.6625	-0.371132	0.388851	-0.954433	0.339865	0.418111
YCL068C	YCL068C	YCL068C	CDS	YCL068C	5.07568	1.49025	1.86334	1.11764	1.6672	0.0954743	0.133439
YFL005W	YFL005W	YFL005W	CDS	SEC4	3086.35	4804.42	-0.63912	0.0454461	-14.0632	6.38846e-45	6.23142e-44
YCL076W	YCL076W	YCL076W	CDS	YCL076W	2.61375	1.04577	1.34124	1.4083	0.95238	0.340904	0.419095
YMR152W	YMR152W	YMR152W	CDS	YIM1	3436.64	4668.16	-0.442121	0.0447765	-9.87395	5.39963e-23	2.82691e-22
YDR154C	YDR154C	YDR154C	CDS	YDR154C	4626.75	7777.94	-0.749506	0.136181	-5.50376	3.71771e-08	9.63791e-08
YMR125W	YMR125W	YMR125W	CDS	STO1	2337.35	3197.78	-0.452799	0.0566898	-7.98731	1.3791e-15	5.36583e-15
YJR031C	YJR031C	YJR031C	CDS	GEA1	979.098	968.823	0.0129843	0.0716699	0.181168	0.856235	0.892663
YCL026C-A	YCL026C-A	YCL026C-A	CDS	FRM2	31.5331	32.6512	-0.0417952	0.370497	-0.112809	0.910182	0.936463
[truncated: 5,115 more rows]

## Sheet: ulp2D 500G (Uba2C162S)  vs WT 
genes	GeneVer	GeneID	GeneType	GeneName	mean_ulp2D500G.6	mean_WT	log2FoldChange	lfcSE	stat	pvalue	padj
YIL130W	YIL130W	YIL130W	CDS	ASG1	2439.55	1953.86	0.319138	0.0497635	6.4131	1.42587e-10	3.84638e-10
YAL008W	YAL008W	YAL008W	CDS	FUN14	5767.23	4897.87	0.2352	0.0430401	5.46468	4.63749e-08	1.10052e-07
YBR255W	YBR255W	YBR255W	CDS	MTC4	2274.82	2055.12	0.146482	0.0489604	2.99184	0.00277299	0.00465208
YGR164W	YGR164W	YGR164W	CDS	YGR164W	44.8922	44.3128	0.0130015	0.275996	0.0471076	0.962427	0.978969
YGR131W	YGR131W	YGR131W	CDS	FHN1	99.673	186.371	-0.893813	0.190011	-4.70401	2.55105e-06	5.43519e-06
YNL003C	YNL003C	YNL003C	CDS	PET8	1328.75	1082.52	0.294467	0.0631229	4.66498	3.08643e-06	6.52805e-06
YBR135W	YBR135W	YBR135W	CDS	CKS1	545.795	978.02	-0.843034	0.083274	-10.1236	4.34106e-24	1.91643e-23
HRA1	HRA1	HRA1	noncoding_exon	HRA1	31.9331	4.70137	2.75065	0.538933	5.10388	3.32755e-07	7.48698e-07
YJL082W	YJL082W	YJL082W	CDS	IML2	4659.78	2502.69	0.898099	0.0534172	16.8129	1.96337e-63	1.95889e-62
YJL142C	YJL142C	YJL142C	CDS	IRC9	486.81	286.055	0.763886	0.114024	6.69933	2.09374e-11	5.89388e-11
YPL191C	YPL191C	YPL191C	CDS	YPL191C	731.234	616.791	0.244895	0.0763658	3.20687	0.00134189	0.0023163
YGL215W	YGL215W	YGL215W	CDS	CLG1	10260.2	18048.3	-0.815072	0.040855	-19.9503	1.48852e-88	2.1303e-87
YKL074C	YKL074C	YKL074C	CDS	MUD2	1194.93	1345.78	-0.17071	0.0684522	-2.49386	0.0126361	0.0197297
Q0010	Q0010	Q0010	CDS	Q0010	1.52263	15.1647	-3.28136	2.04163	-1.60723	0.108004	0.147266
YJL077C	YJL077C	YJL077C	CDS	ICS3	16.054	8.80084	0.855603	0.546146	1.56662	0.117204	0.158757
Q0017	Q0017	Q0017	CDS	Q0017	1.11788	3.46807	-1.6902	1.37953	-1.2252	0.220501	0.280149
YIL124W	YIL124W	YIL124W	CDS	AYR1	5922.86	5429.89	0.125696	0.0431326	2.91417	0.00356639	0.00591491
Q0020	Q0020	Q0020	noncoding_exon	15S_RRNA	5255.79	15931.6	-1.6001	0.120051	-13.3285	1.58091e-40	1.03672e-39
YPL039W	YPL039W	YPL039W	CDS	YPL039W	1309.76	990.979	0.402033	0.0689955	5.82695	5.64505e-09	1.40353e-08
YNL170W	YNL170W	YNL170W	CDS	YNL170W	152.128	110.976	0.456774	0.156939	2.91051	0.00360838	0.00597602
YKL048C	YKL048C	YKL048C	CDS	ELM1	1020.56	1063.23	-0.0599242	0.065304	-0.917618	0.358819	0.433337
YJL179W	YJL179W	YJL179W	CDS	PFD1	369.883	591.025	-0.678981	0.103113	-6.58484	4.55391e-11	1.26158e-10
Q0032	Q0032	Q0032	CDS	Q0032	3.07307	50.6625	-4.0363	0.604797	-6.67381	2.49242e-11	6.98238e-11
YDR316W-B	YDR316W-B	YDR316W-B	CDS	YDR316W-B	19.6119	25.9801	-0.413201	0.527858	-0.782788	0.433752	0.511969
YKL083W	YKL083W	YKL083W	CDS	YKL083W	50.6072	53.5784	-0.0836526	0.346552	-0.241386	0.809256	0.855174
YBR152W	YBR152W	YBR152W	CDS	SPP381	378.183	374.174	0.0145558	0.115689	0.125818	0.899876	0.927773
YKL029C	YKL029C	YKL029C	CDS	MAE1	2337.09	4536.98	-0.956737	0.0662427	-14.4429	2.77866e-47	2.10024e-46
YPL166W	YPL166W	YPL166W	CDS	ATG29	1208.22	732.908	0.722527	0.0660521	10.9387	7.52392e-28	3.7162e-27
YLR220W	YLR220W	YLR220W	CDS	CCC1	4707.09	3626.68	0.375924	0.0472275	7.95987	1.72224e-15	5.73859e-15
YHR025W	YHR025W	YHR025W	CDS	THR1	2344.27	3943.37	-0.749436	0.0585873	-12.7918	1.82258e-37	1.1205e-36
YOL034W	YOL034W	YOL034W	CDS	SMC5	1015.39	997.118	0.0260399	0.0665451	0.391312	0.695567	0.760463
YBL008W	YBL008W	YBL008W	CDS	HIR1	799.127	851.286	-0.0915446	0.072112	-1.26948	0.204271	0.261479
YIL062C	YIL062C	YIL062C	CDS	ARC15	6009.97	4980.44	0.271509	0.0583904	4.64989	3.32119e-06	7.01184e-06
Q0045	Q0045	Q0045	CDS	COX1	377.252	825.441	-1.13144	0.0967085	-11.6995	1.28268e-31	6.89094e-31
YOL116W	YOL116W	YOL116W	CDS	MSN1	2327.58	1369.89	0.763152	0.0503663	15.152	7.3445e-52	6.02042e-51
YDR196C	YDR196C	YDR196C	CDS	CAB5	3878.86	3150.26	0.300444	0.0498782	6.02354	1.70639e-09	4.36855e-09
YNL255C	YNL255C	YNL255C	CDS	GIS2	4690.91	7161.25	-0.610707	0.0425377	-14.3568	9.65451e-47	7.15786e-46
YNR032W	YNR032W	YNR032W	CDS	PPG1	1145.87	846.28	0.438943	0.0769702	5.70276	1.17883e-08	2.87965e-08
YNR045W	YNR045W	YNR045W	CDS	PET494	3448.01	3019.64	0.191486	0.0492294	3.88966	0.000100384	0.000189635
YML105C	YML105C	YML105C	CDS	SEC65	1905.87	2722.04	-0.513344	0.0559824	-9.16975	4.74139e-20	1.83456e-19
YNL288W	YNL288W	YNL288W	CDS	CAF40	1388.71	1186.6	0.229608	0.0709004	3.23845	0.00120179	0.00208374
YIL059C	YIL059C	YIL059C	CDS	YIL059C	3119.89	3238.84	-0.0530663	0.0684697	-0.775033	0.43832	0.516663
YIL004C	YIL004C	YIL004C	CDS	BET1	850.969	907.168	-0.0954922	0.082953	-1.15116	0.249666	0.313103
YNR018W	YNR018W	YNR018W	CDS	RCF2	4372.68	5689.78	-0.37907	0.0605537	-6.26006	3.84834e-10	1.01614e-09
Q0075	Q0075	Q0075	CDS	AI5_BETA	91.9666	0	26.1743	4.24807	6.16146
YFR047C	YFR047C	YFR047C	CDS	BNA6	7402.12	5096.58	0.53896	0.0423402	12.7293	4.06711e-37	2.4786e-36
YER087C-B	YER087C-B	YER087C-B	CDS	SBH1	1111.39	1844.76	-0.729362	0.0608249	-11.9912	3.95198e-33	2.20628e-32
YHR078W	YHR078W	YHR078W	CDS	YHR078W	2434.5	2098.08	0.215039	0.048999	4.38863	1.14067e-05	2.32394e-05
YIR023C-A	YIR023C-A	YIR023C-A	CDS	YIR023C-A	5.25651	5.74714	-0.119561	1.2683	-0.0942689	0.924896	0.948633
YJR115W	YJR115W	YJR115W	CDS	YJR115W	1543.7	839.008	0.882795	0.0674536	13.0874	3.88508e-39	2.47342e-38
YLR355C	YLR355C	YLR355C	CDS	ILV5	10396.2	18054.3	-0.796103	0.0395889	-20.1092	6.12468e-90	8.89288e-89
YGR099W	YGR099W	YGR099W	CDS	TEL2	747.425	970.197	-0.375847	0.0732832	-5.12869	2.91764e-07	6.5859e-07
Q0080	Q0080	Q0080	CDS	ATP8	115.591	283.915	-1.30187	0.200417	-6.49584	8.2573e-11	2.25357e-10
YBL003C	YBL003C	YBL003C	CDS	HTA2	1983.85	2479.78	-0.322709	0.0606896	-5.31737	1.05279e-07	2.44518e-07
YJR140C	YJR140C	YJR140C	CDS	HIR3	1392.1	1159.37	0.264879	0.0585279	4.52569	6.0198e-06	1.25051e-05
YOR033C	YOR033C	YOR033C	CDS	EXO1	988.131	1093.33	-0.144796	0.0644858	-2.2454	0.0247424	0.0373543
YOR062C	YOR062C	YOR062C	CDS	YOR062C	758.936	680.207	0.154427	0.0794034	1.94484	0.0517938	0.0746138
YBR043C	YBR043C	YBR043C	CDS	QDR3	1675.55	1933.37	-0.205838	0.0569987	-3.61127	0.000304706	0.000554329
YHR112C	YHR112C	YHR112C	CDS	YHR112C	4236.81	3423.36	0.30771	0.0394681	7.79644	6.36806e-15	2.07147e-14
YLR011W	YLR011W	YLR011W	CDS	LOT6	458.046	561.749	-0.292581	0.0924788	-3.16376	0.00155745	0.0026778
YIL044C	YIL044C	YIL044C	CDS	AGE2	1408.46	1268.38	0.150658	0.0675548	2.23016	0.025737	0.0387136
YKR103W	YKR103W	YKR103W	CDS	NFT1	474.319	346.075	0.457088	0.100003	4.57076	4.85957e-06	1.01675e-05
YLR133W	YLR133W	YLR133W	CDS	CKI1	3094.4	2697.48	0.198138	0.0499315	3.96821	7.24158e-05	0.000139019
YER121W	YER121W	YER121W	CDS	YER121W	1127.74	1117.08	0.0130569	0.0714394	0.182769	0.854979	0.89029
YCR046C	YCR046C	YCR046C	CDS	IMG1	3676.78	3365.82	0.128401	0.0612584	2.09605	0.0360773	0.0532807
YKL204W	YKL204W	YKL204W	CDS	EAP1	5016.39	4736.61	0.0832991	0.0522993	1.59274	0.111219	0.151385
YOR266W	YOR266W	YOR266W	CDS	PNT1	908.793	897.989	0.0142479	0.093935	0.151678	0.879441	0.910607
YDR421W	YDR421W	YDR421W	CDS	ARO80	2619.36	2061.26	0.345807	0.0601221	5.75174	8.83296e-09	2.17523e-08
Q0085	Q0085	Q0085	CDS	ATP6	572.235	1471.22	-1.36285	0.155813	-8.74672	2.19644e-18	8.03137e-18
YPR194C	YPR194C	YPR194C	CDS	OPT2	947.219	1549.84	-0.711236	0.0679225	-10.4713	1.1703e-25	5.45986e-25
YGR019W	YGR019W	YGR019W	CDS	UGA1	13101.7	7421.3	0.820444	0.039675	20.6791	5.33837e-95	8.21215e-94
YNL208W	YNL208W	YNL208W	CDS	YNL208W	26604.3	26994.5	-0.0208506	0.0572398	-0.364267	0.715659	0.777077
YJL188C	YJL188C	YJL188C	CDS	BUD19	7.09028	13.3811	-0.934539	0.573724	-1.6289	0.103334	0.141479
Q0092	Q0092	Q0092	CDS	Q0092	1.70243	9.17955	-2.41955	0.848419	-2.85183	0.00434679	0.00714306
YLL057C	YLL057C	YLL057C	CDS	JLP1	362.855	340.283	0.097418	0.0988941	0.985074	0.324588	0.396801
YPL060C-A	YPL060C-A	YPL060C-A	CDS	YPL060C-A	32.5449	30.2591	0.116897	0.384428	0.304079	0.761067	0.81448
YNL229C	YNL229C	YNL229C	CDS	URE2	3890.73	3762.09	0.0481434	0.0407106	1.18258	0.236977	0.299015
YNL277W	YNL277W	YNL277W	CDS	MET2	1492.77	1304.55	0.197013	0.076048	2.59064	0.00957977	0.0151609
YMR040W	YMR040W	YMR040W	CDS	YET2	854.014	1315.23	-0.62645	0.0693074	-9.03872	1.58523e-19	6.03008e-19
YDR077W	YDR077W	YDR077W	CDS	SED1	227102	253846	-0.160604	0.0443575	-3.62067	0.000293841	0.00053526
YMR266W	YMR266W	YMR266W	CDS	RSN1	5516.69	4260.24	0.37274	0.0442459	8.42428	3.62964e-17	1.27769e-16
YKR064W	YKR064W	YKR064W	CDS	OAF3	2212.93	1608.41	0.458742	0.0615598	7.45198	9.19524e-14	2.86694e-13
YPL089C	YPL089C	YPL089C	CDS	RLM1	6610.18	5158.24	0.358488	0.0419733	8.54085	1.33234e-17	4.76937e-17
YGR277C	YGR277C	YGR277C	CDS	CAB4	639.097	719.607	-0.170602	0.0915229	-1.86404	0.0623163	0.0886931
YDL139C	YDL139C	YDL139C	CDS	SCM3	509.122	586.201	-0.205097	0.0811412	-2.52766	0.0114827	0.0180011
YDR246W	YDR246W	YDR246W	CDS	TRS23	3074.81	2698.67	0.189052	0.0571791	3.30631	0.000945328	0.00165344
YOR288C	YOR288C	YOR288C	CDS	MPD1	741.743	921.925	-0.3159	0.0798334	-3.95699	7.58987e-05	0.000145426
YDL240C-A	YDL240C-A	YDL240C-A	CDS	YDL240C-A	0.761589	0.745127	0.0267934	2.39295	0.0111968	0.991066	1
YCR028C	YCR028C	YCR028C	CDS	FEN2	1194.63	1322.11	-0.145587	0.0638572	-2.27988	0.0226148	0.0343053
Q0105	Q0105	Q0105	CDS	COB	129.017	429.616	-1.736	0.147898	-11.7378	8.15432e-32	4.39767e-31
YPR070W	YPR070W	YPR070W	CDS	MED1	1281.62	1202.38	0.0916752	0.0616929	1.48599	0.137281	0.183146
YOR141C	YOR141C	YOR141C	CDS	ARP8	2769.92	2493.16	0.151135	0.044078	3.42881	0.000606235	0.00107352
YPL280W	YPL280W	YPL280W	CDS	HSP32	37.9438	60.0799	-0.665194	0.292647	-2.27303	0.0230243	0.0349114
YBL106C	YBL106C	YBL106C	CDS	SRO77	983.822	1092.92	-0.15214	0.0741338	-2.05223	0.0401473	0.0589423
YGL044C	YGL044C	YGL044C	CDS	RNA15	1741.85	1271.15	0.455236	0.0600769	7.57755	3.52131e-14	1.11583e-13
YER107C	YER107C	YER107C	CDS	GLE2	933.811	1526.94	-0.707093	0.0643901	-10.9814	4.69574e-28	2.33417e-27
Q0120	Q0120	Q0120	CDS	BI4	555.842	2378.46	-2.09806	0.0873085	-24.0304	1.33736e-127	2.82178e-126
YER076W-A	YER076W-A	YER076W-A	CDS	YER076W-A	160.243	103.776	0.630845	0.186785	3.37739	0.000731761	0.00129024
YGR259C	YGR259C	YGR259C	CDS	YGR259C	276.549	232.573	0.249997	0.126395	1.97791	0.0479389	0.0695049
YEL047C	YEL047C	YEL047C	CDS	FRD1	2983.48	4120.09	-0.465018	0.0564672	-8.23518	1.79281e-16	6.17102e-16
YKL093W	YKL093W	YKL093W	CDS	MBR1	12143.3	9018.8	0.429119	0.0384919	11.1483	7.29924e-29	3.69138e-28
YPR016C	YPR016C	YPR016C	CDS	TIF6	2640.49	4057.78	-0.619026	0.0470819	-13.1478	1.75103e-39	1.12194e-38
YLR157C	YLR157C	YLR157C	CDS	ASP3-2	0	0
Q0130	Q0130	Q0130	CDS	OLI1	1172.05	3586.84	-1.61433	0.14948	-10.7997	3.45495e-27	1.67798e-26
YML009C	YML009C	YML009C	CDS	MRPL39	1631.02	1720.71	-0.0765459	0.0776497	-0.985785	0.324239	0.396443
YML072C	YML072C	YML072C	CDS	TCB3	9908.63	9405.47	0.0753342	0.0434432	1.73409	0.0829026	0.115613
YDR142C	YDR142C	YDR142C	CDS	PEX7	1527.08	1131.61	0.432204	0.0571188	7.56676	3.82663e-14	1.21038e-13
Q0140	Q0140	Q0140	CDS	VAR1	249.068	578.639	-1.21745	0.341317	-3.56693	0.000361188	0.000653664
RDN37-2	RDN37-2	RDN37-2	noncoding_exon	RDN37-2	0	0
YBL113W-A	YBL113W-A	YBL113W-A	CDS	YBL113W-A	1.98245	1.7909	0.195679	1.42247	0.137562	0.890586	0.920369
YKL019W	YKL019W	YKL019W	CDS	RAM2	4094.33	2652.64	0.627566	0.0648045	9.68399	3.52666e-22	1.45827e-21
RDN37-1	RDN37-1	RDN37-1	noncoding_exon	RDN37-1	0	0
YBL085W	YBL085W	YBL085W	CDS	BOI1	2822.56	2143	0.396945	0.0563271	7.04714	1.82635e-12	5.37968e-12
YFL011W	YFL011W	YFL011W	CDS	HXT10	75.5543	106.558	-0.495079	0.190931	-2.59297	0.00951505	0.0150653
YDR166C	YDR166C	YDR166C	CDS	SEC5	2930.84	2107.71	0.473712	0.0484037	9.7867	1.28423e-22	5.40307e-22
YHR212W-A	YHR212W-A	YHR212W-A	CDS	YHR212W-A	0	0
YDR082W	YDR082W	YDR082W	CDS	STN1	1331.05	1292	0.0421799	0.0684226	0.616461	0.53759	0.6158
YDR348C	YDR348C	YDR348C	CDS	PAL1	2014.63	3144.68	-0.644171	0.0467898	-13.7673	4.00652e-43	2.77045e-42
YKL182W	YKL182W	YKL182W	CDS	FAS1	16118.9	28648.5	-0.829503	0.037729	-21.9858	3.93927e-107	6.79305e-106
YDR333C	YDR333C	YDR333C	CDS	RQC1	1750.62	1485.74	0.234958	0.0594847	3.9499	7.8184e-05	0.000149599
YKL018C-A	YKL018C-A	YKL018C-A	CDS	YKL018C-A	816.413	999.067	-0.290379	0.0830737	-3.49544	0.00047329	0.000847552
YPL027W	YPL027W	YPL027W	CDS	SMA1	15.6024	20.0524	-0.374638	0.598204	-0.626271	0.531137	0.609908
YKL135C	YKL135C	YKL135C	CDS	APL2	4273.47	3409.95	0.325348	0.0484368	6.71696	1.85551e-11	5.2338e-11
YLR363C	YLR363C	YLR363C	CDS	NMD4	557.721	529.724	0.0740369	0.0911307	0.812426	0.416547	0.49484
YEL077W-A	YEL077W-A	YEL077W-A	CDS	YEL077W-A	0	0	0	2.54814	0	1	1
YDR179C	YDR179C	YDR179C	CDS	CSN9	481.699	607.302	-0.337255	0.116288	-2.90018	0.00372946	0.0061707
YML089C	YML089C	YML089C	CDS	YML089C	408.286	220.32	0.888611	0.11082	8.01848	1.07059e-15	3.59124e-15
YLR431C	YLR431C	YLR431C	CDS	ATG23	1125.31	1119.19	0.00752637	0.0618471	0.121693	0.903142	0.930316
YKR046C	YKR046C	YKR046C	CDS	PET10	11825.1	12884.1	-0.123555	0.0541368	-2.28228	0.0224727	0.0341046
YJR005W	YJR005W	YJR005W	CDS	APL1	3056.5	2110.59	0.533455	0.045624	11.6924	1.39358e-31	7.481e-31
Q0142	Q0142	Q0142	CDS	Q0142	1.32163	12.7337	-3.22791	0.937255	-3.444	0.000573169	0.00101832
YER030W	YER030W	YER030W	CDS	CHZ1	6195.02	4532.78	0.45021	0.0550853	8.17297	3.00885e-16	1.02807e-15
Q0143	Q0143	Q0143	CDS	Q0143	1.8277	11.1955	-2.6885	0.907512	-2.9625	0.00305157	0.00509738
YJR072C	YJR072C	YJR072C	CDS	NPA3	3945.57	4468.2	-0.178876	0.0440804	-4.05795	4.95057e-05	9.66856e-05
YEL030C-A	YEL030C-A	YEL030C-A	CDS	YEL030C-A	16.5611	9.56015	0.789793	0.524012	1.5072	0.131758	0.17652
YKR039W	YKR039W	YKR039W	CDS	GAP1	4517.72	6806.97	-0.590469	0.0472633	-12.4932	8.13264e-36	4.80528e-35
YGL003C	YGL003C	YGL003C	CDS	CDH1	2649.41	1729.42	0.615414	0.0558842	11.0123	3.33367e-28	1.66779e-27
YPL009C	YPL009C	YPL009C	CDS	RQC2	9607.25	10671.4	-0.151352	0.0549192	-2.7559	0.00585306	0.0094822
YDR268W	YDR268W	YDR268W	CDS	MSW1	989.284	1054.54	-0.0924321	0.0712544	-1.29721	0.194558	0.250483
YGL192W	YGL192W	YGL192W	CDS	IME4	18.2179	34.4465	-0.902843	0.365859	-2.46774	0.0135971	0.0211638
YDL117W	YDL117W	YDL117W	CDS	CYK3	1645.47	1142.15	0.528896	0.0713396	7.41377	1.22759e-13	3.80874e-13
Q0144	Q0144	Q0144	CDS	Q0144	0	2.05588	-3.42767	1.98363	-1.72798	0.0839924	0.11697
YMR293C	YMR293C	YMR293C	CDS	HER2	865.458	957.678	-0.145473	0.0681376	-2.13499	0.0327622	0.0486315
YJL214W	YJL214W	YJL214W	CDS	HXT8	34.1967	53.3271	-0.659135	0.275321	-2.39406	0.0166631	0.0256446
YIL105C	YIL105C	YIL105C	CDS	SLM1	4561.92	2919.79	0.644732	0.0507945	12.6929	6.47151e-37	3.9064e-36
YML126C	YML126C	YML126C	CDS	ERG13	5014.74	6871.31	-0.453847	0.0412491	-11.0026	3.71336e-28	1.85244e-27
YLR189C	YLR189C	YLR189C	CDS	ATG26	5260.12	3724.03	0.497616	0.0394895	12.6012	2.07888e-36	1.24305e-35
YIL150C	YIL150C	YIL150C	CDS	MCM10	603.385	804.829	-0.414756	0.0857981	-4.83409	1.33753e-06	2.90193e-06
YLR349W	YLR349W	YLR349W	CDS	YLR349W	20.1458	27.9734	-0.460774	0.344295	-1.33831	0.180794	0.234522
YGL250W	YGL250W	YGL250W	CDS	RMR1	1425.61	993.256	0.520836	0.0743854	7.00186	2.5259e-12	7.39351e-12
YBR212W	YBR212W	YBR212W	CDS	NGR1	14729.3	7507.58	0.972472	0.0371348	26.1876	3.67473e-151	9.75829e-150
YJR109C	YJR109C	YJR109C	CDS	CPA2	7168.52	5108.58	0.488629	0.0382546	12.7731	2.31735e-37	1.42093e-36
YLR254C	YLR254C	YLR254C	CDS	NDL1	2009.89	2487.83	-0.308575	0.0667778	-4.62092	3.82037e-06	8.03418e-06
Q0182	Q0182	Q0182	CDS	Q0182	102.829	249.991	-1.28346	0.187757	-6.83575	8.15755e-12	2.3455e-11
YPL105C	YPL105C	YPL105C	CDS	SYH1	9124.25	5592.7	0.70681	0.0580021	12.1859	3.69412e-34	2.10782e-33
Q0250	Q0250	Q0250	CDS	COX2	490.592	1434.06	-1.54864	0.095328	-16.2454	2.40943e-59	2.24067e-58
YGR110W	YGR110W	YGR110W	CDS	CLD1	3406.59	1896.06	0.846291	0.0493565	17.1465	6.67839e-66	6.89969e-65
YKL177W	YKL177W	YKL177W	CDS	YKL177W	16.5127	18.8195	-0.158415	0.410488	-0.385918	0.699557	0.763273
YGL154C	YGL154C	YGL154C	CDS	LYS5	1332.68	857.898	0.638895	0.0747023	8.55255	1.20402e-17	4.32557e-17
Q0255	Q0255	Q0255	CDS	Q0255	102.041	627.613	-2.61196	0.173198	-15.0808	2.16531e-51	1.76459e-50
YDL215C	YDL215C	YDL215C	CDS	GDH2	66909.8	34532.2	0.954296	0.0362367	26.3351	7.60528e-153	2.03507e-151
Q0275	Q0275	Q0275	CDS	COX3	144.275	393.691	-1.44714	0.153839	-9.40685	5.1124e-21	2.04613e-20
YDR315C	YDR315C	YDR315C	CDS	IPK1	711.1	946.377	-0.411113	0.0877892	-4.68295	2.82772e-06	6.00085e-06
YLR394W	YLR394W	YLR394W	CDS	CST9	1829.5	1632.61	0.163914	0.0593504	2.7618	0.00574829	0.0093168
tS%28CGA%29C	tS%28CGA%29C	tS%28CGA%29C	noncoding_exon	SUP61	0	0
RDN5-4	RDN5-4	RDN5-4	noncoding_exon	RDN5-4	0.68532	0	1.86261	4.36938	0.426287	0.669899	0.736435
YNR066C	YNR066C	YNR066C	CDS	YNR066C	1046.7	887.366	0.239377	0.0806201	2.9692	0.00298581	0.0049935
YKL052C	YKL052C	YKL052C	CDS	ASK1	761.797	1140.44	-0.581919	0.0671092	-8.67123	4.27465e-18	1.55248e-17
YHR006W	YHR006W	YHR006W	CDS	STP2	4232.44	3444.56	0.297477	0.0434145	6.85202	7.28161e-12	2.09883e-11
RUF22	RUF22	RUF22	noncoding_exon	RUF22	1.11788	2.60794	-1.23972	1.56574	-0.791781	0.428488	0.506699
YNL083W	YNL083W	YNL083W	CDS	SAL1	1265.06	1086.75	0.220875	0.072337	3.05342	0.00226248	0.00382966
YGR038C-A	YGR038C-A	YGR038C-A	CDS	YGR038C-A	12.7036	6.8052	0.889155	0.632151	1.40655	0.15956	0.209388
YGR038C-B	YGR038C-B	YGR038C-B	CDS	YGR038C-B	176.002	113.887	0.632899	0.209698	3.01815	0.00254327	0.00428728
YER168C	YER168C	YER168C	CDS	CCA1	1677.12	1608.53	0.0608351	0.0599957	1.01399	0.310587	0.381689
YPL265W	YPL265W	YPL265W	CDS	DIP5	27967.9	20967	0.41563	0.0569643	7.29632	2.95734e-13	9.00745e-13
YOR227W	YOR227W	YOR227W	CDS	HER1	9063.46	6550.28	0.468063	0.0368042	12.7177	4.71725e-37	2.85983e-36
YOR081C	YOR081C	YOR081C	CDS	TGL5	3233.02	2365.53	0.451311	0.0474926	9.50277	2.04385e-21	8.29417e-21
snR10	snR10	snR10	noncoding_exon	SNR10	180.941	525.195	-1.53659	1.27658	-1.20367	0.228716	0.289427
YGR050C	YGR050C	YGR050C	CDS	YGR050C	252.46	198.907	0.340839	0.151945	2.24318	0.0248854	0.0375296
snR161	snR161	snR161	noncoding_exon	SNR161	6.68222	19.5309	-1.56288	0.531996	-2.93777	0.00330582	0.00549711
YGL063W	YGL063W	YGL063W	CDS	PUS2	296.825	403.17	-0.438253	0.10256	-4.27312	1.92753e-05	3.85285e-05
snR17b	snR17b	snR17b	noncoding_exon	SNR17B	458.715	225.36	1.02484	0.139124	7.36637	1.75333e-13	5.39438e-13
YOL157C	YOL157C	YOL157C	CDS	IMA2	931.691	497.33	0.909078	0.0927699	9.79927	1.134e-22	4.77673e-22
snR3	snR3	snR3	noncoding_exon	SNR3	135.613	53.6296	1.32711	0.280146	4.73723	2.16662e-06	4.64162e-06
YPR095C	YPR095C	YPR095C	CDS	SYT1	2057.4	1720.75	0.257973	0.057893	4.45603	8.34896e-06	1.71851e-05
snR36	snR36	snR36	noncoding_exon	SNR36	118.656	40.3394	1.55262	0.255124	6.08576	1.1594e-09	2.99123e-09
YMR056C	YMR056C	YMR056C	CDS	AAC1	3843.12	3085.73	0.317178	0.0648651	4.8898	1.00936e-06	2.20569e-06
YOL128C	YOL128C	YOL128C	CDS	YGK3	346.626	303.56	0.189449	0.106963	1.77116	0.0765345	0.107204
YGL236C	YGL236C	YGL236C	CDS	MTO1	1301.2	1497.53	-0.200551	0.0707076	-2.83634	0.00456339	0.00748666
YHR133C	YHR133C	YHR133C	CDS	NSG1	739.927	1016.15	-0.456605	0.0792233	-5.76351	8.23802e-09	2.03158e-08
YDR017C	YDR017C	YDR017C	CDS	KCS1	3203.84	2625.52	0.286739	0.0435994	6.57668	4.81071e-11	1.32904e-10
YIL090W	YIL090W	YIL090W	CDS	ICE2	1719.53	2477.58	-0.528993	0.0562649	-9.40184	5.36166e-21	2.14286e-20
snR43	snR43	snR43	noncoding_exon	SNR43	259.844	74.3752	1.802	0.163918	10.9933	4.11566e-28	2.0502e-27
snR50	snR50	snR50	noncoding_exon	SNR50	77.3292	17.3895	2.16814	0.329911	6.57189	4.96819e-11	1.372e-10
snR59	snR59	snR59	noncoding_exon	SNR59	23.5457	9.74944	1.29095	0.504693	2.55789	0.0105308	0.0165759
YCR007C	YCR007C	YCR007C	CDS	YCR007C	995.621	777.004	0.356009	0.0785136	4.53436	5.77773e-06	1.20166e-05
snR60	snR60	snR60	noncoding_exon	SNR60	4.19095	12.6722	-1.6067	0.638746	-2.5154	0.0118897	0.0186267
YEL004W	YEL004W	YEL004W	CDS	YEA4	933.85	782.661	0.254241	0.0741124	3.43048	0.000602513	0.00106719
YPR057W	YPR057W	YPR057W	CDS	BRR1	702.033	805.308	-0.199286	0.0744168	-2.67797	0.00740692	0.011881
YLL032C	YLL032C	YLL032C	CDS	YLL032C	1375.89	1404.3	-0.0312862	0.0673839	-0.464299	0.642434	0.712375
YDR116C	YDR116C	YDR116C	CDS	MRPL1	2646.95	2960.2	-0.160442	0.0565699	-2.83616	0.00456591	0.00748903
snR72	snR72	snR72	noncoding_exon	SNR72	7.56854	32.002	-2.07127	0.478383	-4.32972	1.49296e-05	3.00832e-05
YHR130C	YHR130C	YHR130C	CDS	YHR130C	167.447	90.5543	0.884685	0.164008	5.39415	6.88472e-08	1.61515e-07
YLR030W	YLR030W	YLR030W	CDS	YLR030W	360.68	374.125	-0.0527855	0.0924277	-0.5711	0.567932	0.644425
YDR122W	YDR122W	YDR122W	CDS	KIN1	4462.28	3743.62	0.252985	0.0423385	5.97531	2.29657e-09	5.83882e-09
YOL062C	YOL062C	YOL062C	CDS	APM4	3329.53	2652.04	0.327774	0.0575984	5.69069	1.2653e-08	3.08548e-08
YNL234W	YNL234W	YNL234W	CDS	YNL234W	1272.68	902.651	0.495507	0.0594992	8.32795	8.22539e-17	2.86372e-16
YLR467W	YLR467W	YLR467W	CDS	YRF1-5	216.828	146.711	0.559087	0.174788	3.19865	0.0013807	0.00238036
snR82	snR82	snR82	noncoding_exon	SNR82	2506.34	769.573	1.70425	0.0897396	18.9911	2.02079e-80	2.58011e-79
YOL015W	YOL015W	YOL015W	CDS	IRC10	270.723	303.559	-0.169061	0.117112	-1.44359	0.148855	0.197044
YDL070W	YDL070W	YDL070W	CDS	BDF2	8930.73	5302.53	0.751888	0.0559862	13.4299	4.03994e-41	2.68714e-40
YOR241W	YOR241W	YOR241W	CDS	MET7	1007.99	1087.13	-0.108459	0.0632621	-1.71443	0.0864492	0.120056
SRG1	SRG1	SRG1	noncoding_exon	SRG1	18851.6	5756.3	1.71097	0.0443418	38.5858	0	0
tA%28AGC%29D	tA%28AGC%29D	tA%28AGC%29D	noncoding_exon	tA%28AGC%29D	0	0.679352	-1.83228	4.3689	-0.419393	0.674929	0.741109
YMR054W	YMR054W	YMR054W	CDS	STV1	2350.74	2582.23	-0.13535	0.049329	-2.74383	0.00607279	0.00981768
YNL165W	YNL165W	YNL165W	CDS	YNL165W	1241.97	1114.07	0.153821	0.0714217	2.1537	0.031264	0.0464866
YKL110C	YKL110C	YKL110C	CDS	KTI12	1590.71	1452.29	0.132075	0.0701239	1.88345	0.05964	0.0850573
YML100W-A	YML100W-A	YML100W-A	CDS	YML100W-A	43.1408	24.2562	0.831981	0.314562	2.64489	0.00817176	0.01303
YBR280C	YBR280C	YBR280C	CDS	SAF1	5363.26	2968.37	0.8545	0.0489341	17.4622	2.77798e-68	2.98025e-67
YLR204W	YLR204W	YLR204W	CDS	QRI5	2178.85	2618.16	-0.265052	0.0509358	-5.20366	1.95405e-07	4.46129e-07
YML097C	YML097C	YML097C	CDS	VPS9	726	998.084	-0.460695	0.071219	-6.46872	9.8838e-11	2.69327e-10
YKR007W	YKR007W	YKR007W	CDS	MEH1	1693.42	1602.58	0.0790374	0.0643978	1.22733	0.219699	0.279231
tA%28AGC%29J	tA%28AGC%29J	tA%28AGC%29J	noncoding_exon	tA%28AGC%29J	0.304525	1.40051	-1.90911	2.97423	-0.641881	0.52095	0.599788
YHR193C	YHR193C	YHR193C	CDS	EGD2	8129.55	13121.9	-0.691022	0.0447587	-15.4388	8.973e-54	7.57768e-53
YBL099W	YBL099W	YBL099W	CDS	ATP1	121295	117906	0.0409339	0.0377066	1.08559	0.277661	0.34456
YNL305C	YNL305C	YNL305C	CDS	BXI1	12516.2	9432.79	0.408236	0.0563275	7.24755	4.24371e-13	1.28248e-12
YMR023C	YMR023C	YMR023C	CDS	MSS1	832.7	828.122	0.00496635	0.0785715	0.063208	0.949601	0.968318
YOR119C	YOR119C	YOR119C	CDS	RIO1	2758.24	2162.42	0.351138	0.0659298	5.32594	1.0043e-07	2.33722e-07
YNL196C	YNL196C	YNL196C	CDS	SLZ1	117.547	182.122	-0.622314	0.154411	-4.03024	5.57199e-05	0.000108398
YNL187W	YNL187W	YNL187W	CDS	SWT21	585.566	550.466	0.0888219	0.0889547	0.998506	0.318034	0.38947
tA%28AGC%29L	tA%28AGC%29L	tA%28AGC%29L	noncoding_exon	tA%28AGC%29L	0.68532	2.05588	-1.57831	1.57678	-1.00097	0.316842	0.388351
YMR101C	YMR101C	YMR101C	CDS	SRT1	155.507	272.349	-0.813688	0.149095	-5.45753	4.82815e-08	1.14498e-07
YBL062W	YBL062W	YBL062W	CDS	YBL062W	17.875	16.5491	0.124318	0.539061	0.230619	0.817611	0.860877
YCR061W	YCR061W	YCR061W	CDS	YCR061W	4278.86	2949.99	0.536565	0.0611185	8.77909	1.64797e-18	6.05441e-18
tA%28UGC%29L	tA%28UGC%29L	tA%28UGC%29L	noncoding_exon	tA%28UGC%29L	0	1.11769	-2.53785	3.66998	-0.691515	0.489242	0.568847
YPR115W	YPR115W	YPR115W	CDS	RGC1	10576.6	6566.29	0.688222	0.041781	16.4721	5.81886e-61	5.54419e-60
tA%28UGC%29Q	tA%28UGC%29Q	tA%28UGC%29Q	noncoding_exon	tA%28UGC%29Q	0.660816	3.34881	-2.30883	1.56522	-1.47508	0.140191	0.186707
YBR017C	YBR017C	YBR017C	CDS	KAP104	4057.75	2655.75	0.612113	0.04663	13.127	2.30504e-39	1.47556e-38
YPR162C	YPR162C	YPR162C	CDS	ORC4	1158.65	1043.56	0.149239	0.0732348	2.03782	0.0415684	0.0608624
YGR166W	YGR166W	YGR166W	CDS	TRS65	1142.46	1058.9	0.110684	0.0684833	1.61622	0.106046	0.144908
YDL161W	YDL161W	YDL161W	CDS	ENT1	4443.4	3558.4	0.320169	0.0497031	6.44164	1.18187e-10	3.20301e-10
YKL050C	YKL050C	YKL050C	CDS	YKL050C	1368.31	1033.77	0.403633	0.0731968	5.51435	3.50067e-08	8.35852e-08
tC%28GCA%29P1	tC%28GCA%29P1	tC%28GCA%29P1	noncoding_exon	tC%28GCA%29P1	0	2.47025	-3.68487	1.99982	-1.8426	0.0653868	0.0926855
tS%28AGA%29D3	tS%28AGA%29D3	tS%28AGA%29D3	noncoding_exon	tS%28AGA%29D3	0.737085	0.306789	0.972228	2.44327	0.39792	0.690689	0.756077
tS%28AGA%29D1	tS%28AGA%29D1	tS%28AGA%29D1	noncoding_exon	tS%28AGA%29D1	2.08322	1.05192	0.998195	1.9332	0.516344	0.605614	0.67891
YJR055W	YJR055W	YJR055W	CDS	HIT1	227.52	423.747	-0.896125	0.123363	-7.26411	3.75497e-13	1.13872e-12
YGL099W	YGL099W	YGL099W	CDS	LSG1	1082.71	1651.27	-0.608167	0.0630234	-9.64985	4.92269e-22	2.02713e-21
YFL030W	YFL030W	YFL030W	CDS	AGX1	24019.6	32669.9	-0.443663	0.0397239	-11.1687	5.80477e-29	2.94198e-28
YIL119C	YIL119C	YIL119C	CDS	RPI1	3360.86	2571.38	0.384735	0.053817	7.14895	8.74469e-13	2.61107e-12
YPL193W	YPL193W	YPL193W	CDS	RSA1	1876.06	1793.75	0.0655264	0.0557206	1.17598	0.239602	0.302055
tC%28GCA%29Q	tC%28GCA%29Q	tC%28GCA%29Q	noncoding_exon	tC%28GCA%29Q	2.84481	10.0685	-1.83992	0.943435	-1.95023	0.0511486	0.0737909
YGL217C	YGL217C	YGL217C	CDS	YGL217C	7.89757	3.91444	0.992025	0.986797	1.0053	0.314753	0.386401
YJL144W	YJL144W	YJL144W	CDS	YJL144W	2353.53	2016.25	0.222066	0.0559303	3.9704	7.17513e-05	0.000137895
YBR012W-B	YBR012W-B	YBR012W-B	CDS	YBR012W-B	866.07	685.294	0.336835	0.27662	1.21768	0.223346	0.283403
YBR012W-A	YBR012W-A	YBR012W-A	CDS	YBR012W-A	203.325	192.889	0.0760913	0.907266	0.0838688	0.933161	0.95476
YJR139C	YJR139C	YJR139C	CDS	HOM6	6122.95	7237.65	-0.241146	0.0386358	-6.24153	4.33319e-10	1.14071e-09
YBR133C	YBR133C	YBR133C	CDS	HSL7	1751.89	1932.74	-0.141268	0.0598151	-2.36174	0.0181896	0.0278711
tD%28GUC%29B	tD%28GUC%29B	tD%28GUC%29B	noncoding_exon	tD%28GUC%29B	0.356291	1.33473	-1.84971	2.64417	-0.699542	0.484214	0.563719
YFL002W-B	YFL002W-B	YFL002W-B	CDS	YFL002W-B	2.08322	1.83884	0.214531	1.47957	0.144996	0.884714	0.915249
YJL079C	YJL079C	YJL079C	CDS	PRY1	15601.2	28065.3	-0.84704	0.0582987	-14.5293	7.9016e-48	6.01141e-47
YGL019W	YGL019W	YGL019W	CDS	CKB1	4725.19	3602.34	0.392326	0.0394071	9.95572	2.38104e-23	1.02967e-22
YGR201C	YGR201C	YGR201C	CDS	YGR201C	10248.9	7604.72	0.431109	0.0508185	8.48332	2.18862e-17	7.7709e-17
YNL172W	YNL172W	YNL172W	CDS	APC1	2279.2	1417.47	0.684733	0.0571151	11.9886	4.07504e-33	2.27136e-32
YNL058C	YNL058C	YNL058C	CDS	YNL058C	2473.65	4272.58	-0.789093	0.0581085	-13.5796	5.28797e-42	3.56823e-41
YPL160W	YPL160W	YPL160W	CDS	CDC60	1704.52	3205.72	-0.909258	0.051596	-17.6226	1.6512e-69	1.80752e-68
tD%28GUC%29G2	tD%28GUC%29G2	tD%28GUC%29G2	noncoding_exon	tD%28GUC%29G2	2.43951	8.30713	-1.77117	0.974071	-1.81831	0.069016	0.0974935
YNL023C	YNL023C	YNL023C	CDS	FAP1	1158.83	1320.62	-0.186879	0.0638482	-2.92693	0.00342325	0.00568291
YDR214W	YDR214W	YDR214W	CDS	AHA1	6361.19	5466.01	0.218991	0.0350092	6.25525	3.96888e-10	1.04717e-09
tD%28GUC%29I2	tD%28GUC%29I2	tD%28GUC%29I2	noncoding_exon	tD%28GUC%29I2	2.33874	0.962167	1.25632	1.7698	0.709869	0.477786	0.557164
YLR295C	YLR295C	YLR295C	CDS	ATP14	18418.7	18760.2	-0.026511	0.0399668	-0.663325	0.507122	0.587159
YER175W-A	YER175W-A	YER175W-A	CDS	YER175W-A	63.8796	62.1426	0.0393081	0.231144	0.170059	0.864964	0.899079
YHR168W	YHR168W	YHR168W	CDS	MTG2	788.561	719.561	0.132391	0.0966995	1.3691	0.170968	0.222852
YOR064C	YOR064C	YOR064C	CDS	YNG1	2739.49	2717.4	0.0103217	0.0524468	0.196804	0.843981	0.880808
YOR159C	YOR159C	YOR159C	CDS	SME1	485.581	546.627	-0.166464	0.0891784	-1.86664	0.0619514	0.0882097
YOL081W	YOL081W	YOL081W	CDS	IRA2	21060.1	10638	0.985328	0.0351792	28.0088	1.26833e-172	3.9722e-171
tD%28GUC%29J1	tD%28GUC%29J1	tD%28GUC%29J1	noncoding_exon	tD%28GUC%29J1	1.09338	0	2.52369	2.93005	0.861312	0.389066	0.46552
YGL148W	YGL148W	YGL148W	CDS	ARO2	2553.22	4603.6	-0.850207	0.0465438	-18.2668	1.52062e-74	1.75828e-73
YPR204C-A	YPR204C-A	YPR204C-A	CDS	YPR204C-A	0	0
YBR282W	YBR282W	YBR282W	CDS	MRPL27	1153.95	1601.6	-0.472247	0.0691702	-6.82732	8.65127e-12	2.4793e-11
tD%28GUC%29J3	tD%28GUC%29J3	tD%28GUC%29J3	noncoding_exon	tD%28GUC%29J3	0.380795	1.37653	-1.88702	2.62552	-0.718722	0.472312	0.55161
tL%28CAA%29G3	tL%28CAA%29G3	tL%28CAA%29G3	noncoding_exon	tL%28CAA%29G3	0	0
tL%28CAA%29G1	tL%28CAA%29G1	tL%28CAA%29G1	noncoding_exon	tL%28CAA%29G1	0	0
YDR194C	YDR194C	YDR194C	CDS	MSS116	2220.07	2861.65	-0.366298	0.0612131	-5.98398	2.17745e-09	5.54608e-09
YOL114C	YOL114C	YOL114C	CDS	YOL114C	372.686	277.98	0.420475	0.116231	3.61758	0.000297368	0.000541543
YGR084C	YGR084C	YGR084C	CDS	MRP13	2161.79	2356.54	-0.125767	0.0613106	-2.05131	0.0402367	0.0590612
YNR030W	YNR030W	YNR030W	CDS	ALG12	1036.78	1300.72	-0.325692	0.0612317	-5.31901	1.04331e-07	2.4256e-07
YAL037C-A	YAL037C-A	YAL037C-A	CDS	YAL037C-A	1.04161	1.35256	-0.389963	1.51433	-0.257515	0.796781	0.845959
tD%28GUC%29K	tD%28GUC%29K	tD%28GUC%29K	noncoding_exon	tD%28GUC%29K	0	1.05192	-2.45972	4.32637	-0.568542	0.569667	0.646184
YKL076C	YKL076C	YKL076C	CDS	PSY1	133.714	118.095	0.180156	0.183017	0.984368	0.324935	0.397085
YDR466W	YDR466W	YDR466W	CDS	PKH3	3373.96	2728.59	0.305904	0.048957	6.24841	4.14652e-10	1.09239e-09
YNL331C	YNL331C	YNL331C	CDS	AAD14	921.322	772.884	0.252847	0.0726486	3.48041	0.000500639	0.000894693
YFR045W	YFR045W	YFR045W	CDS	YFR045W	2568.41	1822.63	0.494707	0.0535973	9.23006	2.70468e-20	1.05469e-19
YIL002C	YIL002C	YIL002C	CDS	INP51	1631.79	1597.91	0.0312425	0.0586284	0.53289	0.59411	0.668912
tD%28GUC%29M	tD%28GUC%29M	tD%28GUC%29M	noncoding_exon	tD%28GUC%29M	0.712581	2.42845	-1.78371	1.91312	-0.93236	0.351151	0.42518
tD%28GUC%29O	tD%28GUC%29O	tD%28GUC%29O	noncoding_exon	tD%28GUC%29O	2.15949	4.50216	-1.0843	1.07876	-1.00513	0.314833	0.386432
YFR032C	YFR032C	YFR032C	CDS	RRT5	14.7285	26.2482	-0.820298	0.417869	-1.96305	0.0496403	0.0717928
YNL118C	YNL118C	YNL118C	CDS	DCP2	5219.54	4091.95	0.351089	0.0414976	8.46045	2.66348e-17	9.42336e-17
YGL228W	YGL228W	YGL228W	CDS	SHE10	7561.03	7152.35	0.0798869	0.0532916	1.49905	0.133861	0.178993
YJR117W	YJR117W	YJR117W	CDS	STE24	6522.83	4500.05	0.536028	0.0425055	12.6108	1.84113e-36	1.10278e-35
YBR196C-A	YBR196C-A	YBR196C-A	CDS	YBR196C-A	9.02041	14.2836	-0.642596	0.544163	-1.18089	0.237647	0.299752
YBR196C-B	YBR196C-B	YBR196C-B	CDS	YBR196C-B	8.63741	11.9689	-0.470452	0.541232	-0.869224	0.384725	0.460957
YIL030W-A	YIL030W-A	YIL030W-A	CDS	YIL030W-A	16.8935	28.818	-0.753128	0.386232	-1.94993	0.0511839	0.0738114
YLR357W	YLR357W	YLR357W	CDS	RSC2	2578.65	2424.48	0.0878781	0.0430093	2.04324	0.0410291	0.0601484
tE%28CUC%29I	tE%28CUC%29I	tE%28CUC%29I	noncoding_exon	tE%28CUC%29I	0.380795	1.00397	-1.4405	2.5986	-0.554337	0.579348	0.655462
YJR093C	YJR093C	YJR093C	CDS	FIP1	2556.14	2042.63	0.322633	0.0673837	4.78799	1.68458e-06	3.63346e-06
YLR017W	YLR017W	YLR017W	CDS	MEU1	1523.69	2387.83	-0.647853	0.0487305	-13.2946	2.48737e-40	1.62201e-39
YHR110W	YHR110W	YHR110W	CDS	ERP5	1963.8	2618.26	-0.415245	0.0511292	-8.12147	4.60552e-16	1.56597e-15
YBR041W	YBR041W	YBR041W	CDS	FAT1	1749.61	1389.52	0.33418	0.0550397	6.07162	1.26628e-09	3.26337e-09
YNL212W	YNL212W	YNL212W	CDS	VID27	2747.25	3557.65	-0.372283	0.051399	-7.243	4.38866e-13	1.32571e-12
YDR119W-A	YDR119W-A	YDR119W-A	CDS	COX26	9764.41	7615.88	0.358414	0.0398237	9	2.25711e-19	8.54398e-19
YDL039C	YDL039C	YDL039C	CDS	PRM7	1831.82	952.919	0.944208	0.0618691	15.2614	1.38271e-52	1.14418e-51
YKL202W	YKL202W	YKL202W	CDS	YKL202W	450.762	278.515	0.693767	0.486036	1.4274	0.153465	0.202074
YGR122C-A	YGR122C-A	YGR122C-A	CDS	YGR122C-A	122.157	79.9515	0.601857	0.206564	2.91366	0.00357222	0.00592316
YOR264W	YOR264W	YOR264W	CDS	DSE3	4010.11	2124.34	0.915897	0.0455835	20.0927	8.54353e-90	1.23793e-88
YNL042W-B	YNL042W-B	YNL042W-B	CDS	YNL042W-B	11.3897	7.9106	0.529958	0.732179	0.723808	0.469183	0.548506
YBL029C-A	YBL029C-A	YBL029C-A	CDS	YBL029C-A	4887.11	3206.84	0.608648	0.0648339	9.3878	6.12664e-21	2.44505e-20
YGR184C	YGR184C	YGR184C	CDS	UBR1	6299.04	5039.64	0.321642	0.0434235	7.40708	1.29109e-13	3.99864e-13
YOR366W	YOR366W	YOR366W	CDS	YOR366W	185.828	93.0381	0.997009	0.173615	5.74264	9.32095e-09	2.29136e-08
YNL275W	YNL275W	YNL275W	CDS	BOR1	647.738	545.494	0.249934	0.0886781	2.81844	0.00482571	0.00788738
YAR015W	YAR015W	YAR015W	CDS	ADE1	4822.88	4638.89	0.0566673	0.0399979	1.41676	0.156554	0.205831
YPR046W	YPR046W	YPR046W	CDS	MCM16	112.829	169.768	-0.584677	0.168444	-3.47105	0.000518429	0.000925538
YLL051C	YLL051C	YLL051C	CDS	FRE6	2151.21	1862.93	0.20886	0.0462581	4.51511	6.32845e-06	1.31307e-05
YDR427W	YDR427W	YDR427W	CDS	RPN9	4649.32	4029.93	0.205792	0.0444376	4.63103	3.63848e-06	7.66088e-06
YLR079W	YLR079W	YLR079W	CDS	SIC1	4949.69	3996	0.308098	0.039856	7.73026	1.07325e-14	3.46696e-14
YLR408C	YLR408C	YLR408C	CDS	BLS1	337.065	359.474	-0.0988901	0.118425	-0.835043	0.403694	0.48129
YMR093W	YMR093W	YMR093W	CDS	UTP15	433.887	774.189	-0.835217	0.0961442	-8.68713	3.71726e-18	1.35215e-17
tE%28UUC%29B	tE%28UUC%29B	tE%28UUC%29B	noncoding_exon	tE%28UUC%29B	0	1.06974	-2.47767	3.02974	-0.817781	0.413482	0.491617
YDR079W	YDR079W	YDR079W	CDS	PET100	2851.68	2311.06	0.302963	0.0773189	3.91836	8.91544e-05	0.00016943
YMR268C	YMR268C	YMR268C	CDS	PRP24	869.857	1121.78	-0.366292	0.0827967	-4.42399	9.68935e-06	1.9868e-05
YOR169C	YOR169C	YOR169C	CDS	YOR169C	19.8669	39.3364	-0.98204	0.517318	-1.89833	0.0576527	0.0824757
YML070W	YML070W	YML070W	CDS	DAK1	5476.66	5706.69	-0.058845	0.0533943	-1.10208	0.270425	0.336478
YHR175W-A	YHR175W-A	YHR175W-A	CDS	YHR175W-A	132.694	195.361	-0.563797	0.158065	-3.56687	0.000361275	0.000653664
YPR072W	YPR072W	YPR072W	CDS	NOT5	3935.19	2884.65	0.447681	0.0525644	8.5168	1.64028e-17	5.85071e-17
tE%28UUC%29C	tE%28UUC%29C	tE%28UUC%29C	noncoding_exon	tE%28UUC%29C	0.68532	1.74295	-1.3434	2.9125	-0.461254	0.644616	0.714069
tE%28UUC%29G1	tE%28UUC%29G1	tE%28UUC%29G1	noncoding_exon	SOE1	6.63046	26.8303	-2.01639	0.582234	-3.46319	0.000533812	0.000950572
YER062C	YER062C	YER062C	CDS	GPP2	1327.53	1324.9	0.00395512	0.0665301	0.0594486	0.952595	0.970663
YDR244W	YDR244W	YDR244W	CDS	PEX5	2227.95	2023.34	0.139329	0.0538743	2.58618	0.00970458	0.0153411
tE%28UUC%29G2	tE%28UUC%29G2	tE%28UUC%29G2	noncoding_exon	tE%28UUC%29G2	0.737085	0	1.95022	3.30989	0.58921	0.55572	0.63345
YJL009W	YJL009W	YJL009W	CDS	YJL009W	0	0.348589	-0.944338	2.52665	-0.37375	0.70859	0.771681
YDL137W	YDL137W	YDL137W	CDS	ARF2	9988.23	10073.9	-0.0123832	0.035533	-0.348497	0.727467	0.787084
YGR271W	YGR271W	YGR271W	CDS	SLH1	2462.55	2202.46	0.161131	0.0513335	3.13891	0.00169575	0.00290915
YDR233C	YDR233C	YDR233C	CDS	RTN1	7183.8	12227.6	-0.767078	0.0436676	-17.5663	4.46165e-69	4.85361e-68
YGR071C	YGR071C	YGR071C	CDS	ENV11	1128.87	887.282	0.345558	0.0882921	3.9138	9.08531e-05	0.000172611
YCR106W	YCR106W	YCR106W	CDS	RDS1	281.026	334.27	-0.246721	0.146887	-1.67967	0.0930216	0.128672
YBL100C	YBL100C	YBL100C	CDS	YBL100C	7.44105	12.947	-0.804902	0.710913	-1.13221	0.257547	0.321771
YDR489W	YDR489W	YDR489W	CDS	SLD5	263.802	410.95	-0.639291	0.127279	-5.02276	5.0934e-07	1.13468e-06
YPL282C	YPL282C	YPL282C	CDS	PAU22	0	0
YPR049C	YPR049C	YPR049C	CDS	ATG11	2805.9	2160.67	0.37683	0.0531457	7.09051	1.33622e-12	3.95429e-12
YDL057W	YDL057W	YDL057W	CDS	YDL057W	2513.6	1420.77	0.82227	0.050037	16.4332	1.10592e-60	1.05085e-59
YPR014C	YPR014C	YPR014C	CDS	YPR014C	1.67516	1.90651	-0.201539	1.7168	-0.117392	0.906549	0.93306
YGR257C	YGR257C	YGR257C	CDS	MTM1	1837.26	1833.57	0.0038457	0.0569744	0.0674986	0.946185	0.965779
YEL045C	YEL045C	YEL045C	CDS	YEL045C	159.046	214.517	-0.43481	0.197594	-2.20052	0.0277701	0.0415747
YPL235W	YPL235W	YPL235W	CDS	RVB2	2738.36	2582.63	0.0837578	0.0550193	1.52233	0.127925	0.171847
YLR122C	YLR122C	YLR122C	CDS	YLR122C	248.034	170.162	0.534938	0.154482	3.4628	0.000534594	0.000951722
YLR155C	YLR155C	YLR155C	CDS	ASP3-1	59.0725	37.9282	0.632342	0.307274	2.05791	0.0395992	0.0581744
tE%28UUC%29G3	tE%28UUC%29G3	tE%28UUC%29G3	noncoding_exon	tE%28UUC%29G3	0	1.73127	-3.17497	2.04297	-1.55409	0.120162	0.162386
YJL132W	YJL132W	YJL132W	CDS	YJL132W	1548.69	1032.46	0.584198	0.0646633	9.03446	1.64818e-19	6.26614e-19
YGL190C	YGL190C	YGL190C	CDS	CDC55	4570.94	2998.63	0.607105	0.0517988	11.7204	1.00147e-31	5.38847e-31
YBR110W	YBR110W	YBR110W	CDS	ALG1	2392.13	2391.47	0.000177703	0.0520251	0.00341572	0.997275	1
tE%28UUC%29I	tE%28UUC%29I	tE%28UUC%29I	noncoding_exon	tE%28UUC%29I	0	1.3587	-2.83229	3.01617	-0.939034	0.347713	0.421749
YFL046W	YFL046W	YFL046W	CDS	FMP32	1396.34	1361.86	0.0344751	0.0713692	0.483054	0.629058	0.700468
YOR103C	YOR103C	YOR103C	CDS	OST2	1034.86	1578.53	-0.609142	0.0775508	-7.85474	4.00601e-15	1.3129e-14
YKL137W	YKL137W	YKL137W	CDS	CMC1	1712.51	1409.96	0.278705	0.0661042	4.21614	2.48515e-05	4.94763e-05
tE%28UUC%29J	tE%28UUC%29J	tE%28UUC%29J	noncoding_exon	tE%28UUC%29J	3.96214	9.36709	-1.21853	0.772255	-1.57789	0.114591	0.15555
YGL009C	YGL009C	YGL009C	CDS	LEU1	4708.05	8302.78	-0.818169	0.0392355	-20.8527	1.43956e-96	2.23419e-95
YNL324W	YNL324W	YNL324W	CDS	YNL324W	14.3221	7.30506	0.94428	0.686601	1.3753	0.169039	0.220668
YPR145W	YPR145W	YPR145W	CDS	ASN1	5895.25	6230.2	-0.0794516	0.0363702	-2.18453	0.0289236	0.0432091
YJL063C	YJL063C	YJL063C	CDS	MRPL8	2941.67	2948.57	-0.00202297	0.0484106	-0.0417877	0.966668	0.982423
YMR149W	YMR149W	YMR149W	CDS	SWP1	3006.27	3507.82	-0.222252	0.0560482	-3.96537	7.32812e-05	0.000140642
YPL021W	YPL021W	YPL021W	CDS	ECM23	8.33288	8.22906	0.0160837	0.621412	0.0258825	0.979351	0.991755
YIR010W	YIR010W	YIR010W	CDS	DSN1	1534.68	1584.02	-0.0469742	0.0607988	-0.772618	0.439749	0.517823
YDR331W	YDR331W	YDR331W	CDS	GPI8	929.247	905.393	0.036913	0.0683852	0.53978	0.589349	0.664409
tE%28UUC%29L	tE%28UUC%29L	tE%28UUC%29L	noncoding_exon	tE%28UUC%29L	0.380795	1.11769	-1.56388	2.70728	-0.577659	0.563495	0.640639
YKR044W	YKR044W	YKR044W	CDS	UIP5	977.278	1191.8	-0.28774	0.0732967	-3.92568	8.64842e-05	0.000164669
YLR433C	YLR433C	YLR433C	CDS	CNA1	1979.98	1997.66	-0.0116176	0.0621043	-0.187065	0.851609	0.88731
YMR068W	YMR068W	YMR068W	CDS	AVO2	1227.38	1353.58	-0.141682	0.0645242	-2.19579	0.0281067	0.0420517
tE%28UUC%29M	tE%28UUC%29M	tE%28UUC%29M	noncoding_exon	tE%28UUC%29M	0.380795	2.62766	-2.83392	1.83866	-1.5413	0.123244	0.166082
YLR157C-C	YLR157C-C	YLR157C-C	CDS	YLR157C-C	0	0
tE%28UUC%29P	tE%28UUC%29P	tE%28UUC%29P	noncoding_exon	tE%28UUC%29P	1.67792	3.40844	-1.00237	1.18761	-0.844026	0.398655	0.476177
YFL068W	YFL068W	YFL068W	CDS	YFL068W	0	0
YER032W	YER032W	YER032W	CDS	FIR1	868.7	1436.58	-0.726808	0.0667141	-10.8944	1.22603e-27	6.01728e-27
tF%28GAA%29D	tF%28GAA%29D	tF%28GAA%29D	noncoding_exon	tF%28GAA%29D	0	0.920366	-2.29642	3.07268	-0.747367	0.454842	0.533348
tF%28GAA%29Q	tF%28GAA%29Q	tF%28GAA%29Q	noncoding_exon	tF%28GAA%29Q	1.67792	4.70137	-1.47274	1.21376	-1.21337	0.224989	0.285177
YGL005C	YGL005C	YGL005C	CDS	COG7	4652.92	4431.67	0.0698459	0.0594349	1.17517	0.239928	0.302356
tP%28UGG%29L	tP%28UGG%29L	tP%28UGG%29L	noncoding_exon	tP%28UGG%29L	0	0
tP%28UGG%29M	tP%28UGG%29M	tP%28UGG%29M	noncoding_exon	SUF7	0	0
YHR043C	YHR043C	YHR043C	CDS	DOG2	3306.36	2616.41	0.338186	0.0491489	6.88084	5.94989e-12	1.72352e-11
YDL111C	YDL111C	YDL111C	CDS	RRP42	1016.51	1076.49	-0.0831278	0.0627504	-1.32474	0.185258	0.239734
YMR133W	YMR133W	YMR133W	CDS	REC114	81.9706	73.7001	0.154167	0.199238	0.773783	0.439059	0.517272
YPL007C	YPL007C	YPL007C	CDS	TFC8	783.138	903.544	-0.206764	0.0840138	-2.46107	0.0138524	0.0215325
tP%28UGG%29F	tP%28UGG%29F	tP%28UGG%29F	noncoding_exon	SUF9	0	0	0	4.40746	0	1	1
tG%28CCC%29O	tG%28CCC%29O	tG%28CCC%29O	noncoding_exon	SUF5	0.356291	2.69344	-2.86106	1.83199	-1.56172	0.118353	0.160128
YKL159C	YKL159C	YKL159C	CDS	RCN1	971.311	1091.7	-0.166665	0.0784091	-2.12558	0.0335382	0.0496883
YDR507C	YDR507C	YDR507C	CDS	GIN4	1782.23	1874.11	-0.0707205	0.0607223	-1.16466	0.244159	0.307023
tP%28UGG%29Q	tP%28UGG%29Q	tP%28UGG%29Q	noncoding_exon	tP%28UGG%29Q	3.15209	3.67958	-0.242571	1.00244	-0.241981	0.808795	0.855135
YKR075W-A	YKR075W-A	YKR075W-A	CDS	YKR075W-A	5.4118	7.89277	-0.527897	0.709382	-0.744165	0.456777	0.535526
YLR138W	YLR138W	YLR138W	CDS	NHA1	2963.09	3181.85	-0.102742	0.0468605	-2.1925	0.0283434	0.0423786
tG%28GCC%29E	tG%28GCC%29E	tG%28GCC%29E	noncoding_exon	tG%28GCC%29E	1.57439	0.372564	2.11796	2.7634	0.766432	0.443419	0.521793
YLR396C	YLR396C	YLR396C	CDS	VPS33	836.862	768.319	0.121865	0.0795292	1.53234	0.125439	0.168734
YBR245C	YBR245C	YBR245C	CDS	ISW1	1639.2	1909.95	-0.222392	0.0663882	-3.34988	0.00080848	0.0014212
YJL216C	YJL216C	YJL216C	CDS	IMA5	315.603	216.692	0.543471	0.124314	4.37174	1.23258e-05	2.5017e-05
YBR210W	YBR210W	YBR210W	CDS	ERV15	1472	1187.2	0.311733	0.0829374	3.75865	0.000170835	0.000316895
YPL103C	YPL103C	YPL103C	CDS	FMP30	1095.88	847.369	0.369616	0.0754458	4.8991	9.62789e-07	2.10787e-06
tG%28GCC%29G1	tG%28GCC%29G1	tG%28GCC%29G1	noncoding_exon	tG%28GCC%29G1	1.06611	8.06612	-2.94253	1.21914	-2.41361	0.0157952	0.0244111
YIL152W	YIL152W	YIL152W	CDS	YIL152W	2213.42	2036.57	0.120078	0.0552737	2.17242	0.0298239	0.044459
tG%28GCC%29G2	tG%28GCC%29G2	tG%28GCC%29G2	noncoding_exon	tG%28GCC%29G2	0.913575	4.55199	-2.24244	1.58383	-1.41584	0.156824	0.206147
YJR096W	YJR096W	YJR096W	CDS	YJR096W	10947.7	7350.1	0.574905	0.0402394	14.2871	2.63307e-46	1.93165e-45
YGR143W	YGR143W	YGR143W	CDS	SKN1	4573.62	3300.6	0.470126	0.0405741	11.5869	4.8047e-31	2.54405e-30
YGR112W	YGR112W	YGR112W	CDS	SHY1	2178.94	2200.58	-0.0144365	0.0567302	-0.254475	0.799128	0.847807
YLR256W	YLR256W	YLR256W	CDS	HAP1	5864.75	4860.51	0.271499	0.0480738	5.64756	1.62744e-08	3.9397e-08
YHR174W	YHR174W	YHR174W	CDS	ENO2	22823.5	23425.4	-0.0374265	0.0627143	-0.596778	0.550655	0.6286
YOR012W	YOR012W	YOR012W	CDS	YOR012W	20.7733	13.7413	0.620557	0.479249	1.29485	0.195371	0.251343
YKL140W	YKL140W	YKL140W	CDS	TGL1	2536.63	2116.05	0.262623	0.0575352	4.56455	5.00556e-06	1.04667e-05
tG%28GCC%29J1	tG%28GCC%29J1	tG%28GCC%29J1	noncoding_exon	tG%28GCC%29J1	0	0.697179	-1.86685	4.36606	-0.427583	0.668954	0.735758
tG%28GCC%29J2	tG%28GCC%29J2	tG%28GCC%29J2	noncoding_exon	SUF23	0.660816	3.47421	-2.35702	1.75815	-1.34063	0.180041	0.233762
YDR478W	YDR478W	YDR478W	CDS	SNM1	346.72	431.15	-0.314592	0.109569	-2.87116	0.00408963	0.00673314
YKL097C	YKL097C	YKL097C	CDS	YKL097C	18.9216	14.9808	0.357134	0.447653	0.797793	0.424991	0.503074
tG%28GCC%29O2	tG%28GCC%29O2	tG%28GCC%29O2	noncoding_exon	SUF17	0.380795	2.47025	-2.72181	1.91741	-1.41953	0.155745	0.204844
YNL106C	YNL106C	YNL106C	CDS	INP52	1036.26	885.065	0.225515	0.0665994	3.38613	0.000708848	0.00125173
YOR378W	YOR378W	YOR378W	CDS	AMF1	109.014	93.1523	0.235781	0.204816	1.15119	0.249656	0.313103
tG%28GCC%29P1	tG%28GCC%29P1	tG%28GCC%29P1	noncoding_exon	tG%28GCC%29P1	6.45341	19.529	-1.57814	0.586889	-2.68899	0.0071668	0.0115091
tG%28UCC%29G	tG%28UCC%29G	tG%28UCC%29G	noncoding_exon	SUF4	0.761589	2.40447	-1.72844	1.79274	-0.964131	0.33498	0.408219
YIL092W	YIL092W	YIL092W	CDS	YIL092W	684.801	781.473	-0.191799	0.0710064	-2.70115	0.00691006	0.0111172
tG%28UCC%29N	tG%28UCC%29N	tG%28UCC%29N	noncoding_exon	SUF6	0.761589	2.01408	-1.47453	1.89078	-0.779852	0.435478	0.513833
YLR453C	YLR453C	YLR453C	CDS	RIF2	418.626	399.042	0.0646958	0.0935629	0.691469	0.489271	0.568847
YBR004C	YBR004C	YBR004C	CDS	GPI18	1480.85	1493.43	-0.0118102	0.0523561	-0.225575	0.821532	0.863963
YGR052W	YGR052W	YGR052W	CDS	FMP48	1323.9	1345.42	-0.023854	0.0756504	-0.315319	0.75252	0.806939
YJR161C	YJR161C	YJR161C	CDS	COS5	852.533	778.101	0.130742	0.075199	1.73862	0.0821022	0.114543
YOR278W	YOR278W	YOR278W	CDS	HEM4	1228.95	1235.16	-0.0092824	0.0746387	-0.124364	0.901027	0.928519
YNL085W	YNL085W	YNL085W	CDS	MKT1	4277.06	4082.96	0.0671498	0.0412595	1.6275	0.103632	0.141831
YGL061C	YGL061C	YGL061C	CDS	DUO1	226.307	409.798	-0.852088	0.124418	-6.84862	7.45666e-12	2.14752e-11
YPL210C	YPL210C	YPL210C	CDS	SRP72	2128.7	2364.15	-0.151179	0.055653	-2.71646	0.0065985	0.0106307
YOR087W	YOR087W	YOR087W	CDS	YVC1	1344.64	1109.43	0.275514	0.0665746	4.13842	3.49702e-05	6.88754e-05
YGL234W	YGL234W	YGL234W	CDS	ADE5%2C7	4054.05	4925.62	-0.280636	0.0638052	-4.39833	1.09089e-05	2.22707e-05
tG%28UCC%29O	tG%28UCC%29O	tG%28UCC%29O	noncoding_exon	SUF1	0	2.10383	-3.45424	2.11493	-1.63326	0.102413	0.140356
YPR093C	YPR093C	YPR093C	CDS	ASR1	2242.9	1485.97	0.594782	0.0583429	10.1946	2.09641e-24	9.34353e-24
YAL029C	YAL029C	YAL029C	CDS	MYO4	2683.06	2830.93	-0.0778249	0.0477142	-1.63106	0.102877	0.140909
YOL155C	YOL155C	YOL155C	CDS	HPF1	3323.19	6562.92	-0.981642	0.0538693	-18.2227	3.41082e-74	3.91796e-73
YDR393W	YDR393W	YDR393W	CDS	SHE9	1333.76	1178.65	0.178904	0.0636426	2.81107	0.00493763	0.00806654
YLR316C	YLR316C	YLR316C	CDS	TAD3	559.985	675.877	-0.27298	0.0776153	-3.51709	0.000436312	0.000784579
YGR186W	YGR186W	YGR186W	CDS	TFG1	9215.5	6445.73	0.515457	0.0425407	12.1168	8.60639e-34	4.88278e-33
YDR294C	YDR294C	YDR294C	CDS	DPL1	7316.81	5873.66	0.317755	0.0428363	7.41789	1.19005e-13	3.69391e-13
YHR135C	YHR135C	YHR135C	CDS	YCK1	6889.91	5043.84	0.450492	0.0433063	10.4025	2.4158e-25	1.11809e-24
tG%28UCC%29Q	tG%28UCC%29Q	tG%28UCC%29Q	noncoding_exon	tG%28UCC%29Q	1.09338	3.98022	-1.91819	1.37514	-1.3949	0.163045	0.213481
tH%28GUG%29E1	tH%28GUG%29E1	tH%28GUG%29E1	noncoding_exon	tH%28GUG%29E1	2.26026	1.11769	1.03371	1.89359	0.545902	0.585133	0.660189
tH%28GUG%29E2	tH%28GUG%29E2	tH%28GUG%29E2	noncoding_exon	tH%28GUG%29E2	2.616	7.98441	-1.58018	0.919221	-1.71905	0.0856062	0.118956
tH%28GUG%29G1	tH%28GUG%29G1	tH%28GUG%29G1	noncoding_exon	tH%28GUG%29G1	0.965341	1.99011	-1.01235	1.74897	-0.578825	0.562707	0.639848
tH%28GUG%29M	tH%28GUG%29M	tH%28GUG%29M	noncoding_exon	tH%28GUG%29M	0.304525	1.61755	-2.14066	2.11139	-1.01386	0.310648	0.381697
tG%28GCC%29O1	tG%28GCC%29O1	tG%28GCC%29O1	noncoding_exon	tG%28GCC%29O1	0	0	0	4.40746	0	1	1
tH%28GUG%29Q	tH%28GUG%29Q	tH%28GUG%29Q	noncoding_exon	tH%28GUG%29Q	2.13499	7.72557	-1.8835	1.02978	-1.82902	0.067396	0.0953401
tI%28AAU%29D	tI%28AAU%29D	tI%28AAU%29D	noncoding_exon	tI%28AAU%29D	0.304525	1.06974	-1.51073	2.51228	-0.60134	0.547614	0.62564
tI%28AAU%29G	tI%28AAU%29G	tI%28AAU%29G	noncoding_exon	tI%28AAU%29G	0	3.1914	-4.05482	1.95218	-2.07707	0.0377948	0.0556758
YOR243C	YOR243C	YOR243C	CDS	PUS7	737.105	1311.31	-0.832522	0.0855187	-9.73497	2.13879e-22	8.93381e-22
tI%28AAU%29I2	tI%28AAU%29I2	tI%28AAU%29I2	noncoding_exon	tI%28AAU%29I2	0.304525	1.65935	-2.16453	2.64679	-0.817793	0.413475	0.491617
tI%28AAU%29P2	tI%28AAU%29P2	tI%28AAU%29P2	noncoding_exon	tI%28AAU%29P2	0.712581	0	1.91443	4.36513	0.438574	0.66097	0.728799
tK%28CUU%29E1	tK%28CUU%29E1	tK%28CUU%29E1	noncoding_exon	tK%28CUU%29E1	1.67516	3.81113	-1.16085	1.23852	-0.937285	0.348612	0.422447
YLR163W-A	YLR163W-A	YLR163W-A	CDS	YLR163W-A	0.304525	0.655378	-0.840736	2.40898	-0.349001	0.727089	0.786797
YPR055W	YPR055W	YPR055W	CDS	SEC8	1888.15	1305.54	0.531801	0.0603501	8.81193	1.23007e-18	4.5358e-18
YHR037W	YHR037W	YHR037W	CDS	PUT2	9496	7061.07	0.427442	0.0462163	9.24872	2.2719e-20	8.89402e-20
YLR032W	YLR032W	YLR032W	CDS	RAD5	898.668	1171.56	-0.38453	0.0733428	-5.24291	1.58063e-07	3.63249e-07
YDR114C	YDR114C	YDR114C	CDS	YDR114C	7.74778	11.7796	-0.608488	0.680768	-0.893826	0.371415	0.44685
tK%28CUU%29I	tK%28CUU%29I	tK%28CUU%29I	noncoding_exon	tK%28CUU%29I	1.06887	0.348589	1.53823	3.90322	0.394093	0.693512	0.758573
tK%28CUU%29J	tK%28CUU%29J	tK%28CUU%29J	noncoding_exon	tK%28CUU%29J	0.913575	0	2.29433	4.09002	0.56096	0.574825	0.650872
YLR089C	YLR089C	YLR089C	CDS	ALT1	12291.7	7106.63	0.790568	0.0350463	22.5578	1.12461e-112	2.0561e-111
YBR099C	YBR099C	YBR099C	CDS	YBR099C	84.0838	73.9558	0.19051	0.211568	0.900466	0.367872	0.443045
YEL020C	YEL020C	YEL020C	CDS	YEL020C	2302.97	1890.38	0.286626	0.054178	5.29045	1.22017e-07	2.82268e-07
YOL060C	YOL060C	YOL060C	CDS	MAM3	5294.66	3864.58	0.454877	0.0439892	10.3406	4.61446e-25	2.11466e-24
tK%28UUU%29L	tK%28UUU%29L	tK%28UUU%29L	noncoding_exon	tK%28UUU%29L	0	1.66549	-3.13197	2.23553	-1.401	0.161214	0.211361
YOR382W	YOR382W	YOR382W	CDS	FIT2	4097.25	2218.06	0.885489	0.0556968	15.8984	6.50133e-57	5.81374e-56
YNL232W	YNL232W	YNL232W	CDS	CSL4	1329.04	1990.14	-0.583634	0.0532691	-10.9563	6.19569e-28	3.07102e-27
YDL076C	YDL076C	YDL076C	CDS	RXT3	997.03	964.453	0.0472167	0.0678939	0.695448	0.486775	0.566323
tL%28CAA%29A	tL%28CAA%29A	tL%28CAA%29A	noncoding_exon	SUP56	0	0.613578	-1.7037	4.38007	-0.388965	0.697302	0.761525
tL%28CAA%29G2	tL%28CAA%29G2	tL%28CAA%29G2	noncoding_exon	SUP54	0	0.613578	-1.7037	4.38007	-0.388965	0.697302	0.761525
tL%28CAA%29L	tL%28CAA%29L	tL%28CAA%29L	noncoding_exon	tL%28CAA%29L	2.5915	6.49841	-1.27898	0.943505	-1.35556	0.175239	0.227909
YJL192C	YJL192C	YJL192C	CDS	SOP4	1427.01	1998.04	-0.485971	0.0555162	-8.75368	2.06506e-18	7.55892e-18
YEL020C-B	YEL020C-B	YEL020C-B	CDS	YEL020C-B	4.94978	4.6774	0.0569686	0.910447	0.0625722	0.950107	0.968552
tL%28UAA%29B1	tL%28UAA%29B1	tL%28UAA%29B1	noncoding_exon	tL%28UAA%29B1	1.42516	0	2.91416	3.10941	0.937208	0.348651	0.422447
tL%28UAA%29D	tL%28UAA%29D	tL%28UAA%29D	noncoding_exon	tL%28UAA%29D	0	2.80101	-3.86815	1.93288	-2.00124	0.045367	0.0660641
YKL116C	YKL116C	YKL116C	CDS	PRR1	897.681	864.752	0.0517075	0.0690876	0.748434	0.454199	0.532951
tL%28UAA%29K	tL%28UAA%29K	tL%28UAA%29K	noncoding_exon	tL%28UAA%29K	0.761589	0	2.00018	4.35842	0.458923	0.646289	0.715663
YGR238C	YGR238C	YGR238C	CDS	KEL2	2035.03	1531.34	0.409338	0.0549325	7.45165	9.21778e-14	2.87269e-13
YER044C	YER044C	YER044C	CDS	ERG28	3034.72	2347.31	0.369296	0.0568914	6.49125	8.51278e-11	2.32149e-10
YDR534C	YDR534C	YDR534C	CDS	FIT1	408.273	247.985	0.725461	0.120206	6.03516	1.58809e-09	4.07018e-09
YDR278C	YDR278C	YDR278C	CDS	YDR278C	0	0.306789	-0.944337	2.71503	-0.347819	0.727976	0.787353
YLR105C	YLR105C	YLR105C	CDS	SEN2	1136.71	1144.72	-0.0101786	0.065455	-0.155506	0.876422	0.90869
YML091C	YML091C	YML091C	CDS	RPM2	32921.2	19426.7	0.760984	0.0359491	21.1684	1.86889e-99	2.97999e-98
tL%28UAA%29N	tL%28UAA%29N	tL%28UAA%29N	noncoding_exon	tL%28UAA%29N	0	1.83884	-3.24697	2.20412	-1.47313	0.140715	0.187298
tC%28GCA%29P2	tC%28GCA%29P2	tC%28GCA%29P2	noncoding_exon	tC%28GCA%29P2	0	0	0	4.40746	0	1	1
YDL098C	YDL098C	YDL098C	CDS	SNU23	311.098	358.496	-0.205268	0.117122	-1.7526	0.0796704	0.111328
YLR202C	YLR202C	YLR202C	CDS	YLR202C	409.198	373.348	0.132348	0.0984819	1.34388	0.178988	0.232524
YLR299C-A	YLR299C-A	YLR299C-A	CDS	YLR299C-A	1.3734	1.06974	0.404271	1.42216	0.284266	0.776206	0.827385
YKR005C	YKR005C	YKR005C	CDS	YKR005C	348.61	334.694	0.0570897	0.107683	0.530162	0.595999	0.670715
tL%28UAG%29L1	tL%28UAG%29L1	tL%28UAG%29L1	noncoding_exon	tL%28UAG%29L1	0	1.49025	-2.95362	3.32014	-0.889606	0.373677	0.449185
tM%28CAU%29J1	tM%28CAU%29J1	tM%28CAU%29J1	noncoding_exon	EMT5	0	0.745127	-1.94205	3.29367	-0.589631	0.555438	0.633232
YNL189W	YNL189W	YNL189W	CDS	SRP1	4003.91	3798.85	0.0760606	0.0494369	1.53854	0.123917	0.166879
YCL047C	YCL047C	YCL047C	CDS	POF1	365.251	347.994	0.0722992	0.112143	0.644708	0.519117	0.598236
YGL122C	YGL122C	YGL122C	CDS	NAB2	6671.46	6231.14	0.0991549	0.0401114	2.47199	0.0134363	0.0209323
YDL018C	YDL018C	YDL018C	CDS	ERP3	907.564	1089.79	-0.264193	0.0680355	-3.88317	0.000103104	0.000194615
YNL303W	YNL303W	YNL303W	CDS	YNL303W	29.1841	56.3918	-0.958671	0.333717	-2.87271	0.00406971	0.00670667
YPR160W	YPR160W	YPR160W	CDS	GPH1	58376	32436.9	0.847819	0.030638	27.6721	1.51233e-168	4.61226e-167
YBL060W	YBL060W	YBL060W	CDS	YEL1	1150.99	985.631	0.22301	0.0740548	3.01142	0.0026003	0.00437919
YBR019C	YBR019C	YBR019C	CDS	GAL10	111.657	95.9871	0.215953	0.250636	0.861619	0.388897	0.465397
YKL056C	YKL056C	YKL056C	CDS	TMA19	10171	14397.8	-0.500994	0.0413846	-12.1058	9.83728e-34	5.57659e-33
YKL065W-A	YKL065W-A	YKL065W-A	CDS	YKL065W-A	5575.6	4577.63	0.283947	0.0737297	3.85119	0.000117544	0.000221036
tM%28CAU%29O2	tM%28CAU%29O2	tM%28CAU%29O2	noncoding_exon	EMT2	1.42241	3.45639	-1.29741	1.35679	-0.95624	0.338951	0.412267
tM%28CAU%29P	tM%28CAU%29P	tM%28CAU%29P	noncoding_exon	IMT2	0.356291	2.73524	-2.87769	1.63392	-1.76122	0.0782012	0.10945
tM%28CAU%29Q1	tM%28CAU%29Q1	tM%28CAU%29Q1	noncoding_exon	tM%28CAU%29Q1	6.88653	18.3634	-1.44144	0.642758	-2.24258	0.0249239	0.0375796
YJR057W	YJR057W	YJR057W	CDS	CDC8	923.776	1014.69	-0.135966	0.0684695	-1.98579	0.0470566	0.068325
YGL211W	YGL211W	YGL211W	CDS	NCS6	1347.15	1454.76	-0.108066	0.0656883	-1.64513	0.0999422	0.137536
YFL032W	YFL032W	YFL032W	CDS	YFL032W	1009.89	1032.32	-0.0314813	0.100588	-0.312971	0.754302	0.808231
YPL195W	YPL195W	YPL195W	CDS	APL5	4013.85	3511.35	0.192895	0.0697033	2.76737	0.00565113	0.0091657
YCL044C	YCL044C	YCL044C	CDS	MGR1	2250.2	1675.58	0.426046	0.0608328	7.00355	2.4955e-12	7.30756e-12
tM%28CAU%29Q2	tM%28CAU%29Q2	tM%28CAU%29Q2	noncoding_exon	tM%28CAU%29Q2	0.304525	1.02794	-1.46444	2.05146	-0.713853	0.475318	0.554842
YNL007C	YNL007C	YNL007C	CDS	SIS1	6049.99	3974.13	0.605551	0.0374297	16.1784	7.16716e-59	6.60362e-58
YPL148C	YPL148C	YPL148C	CDS	PPT2	349.693	484.951	-0.467034	0.106166	-4.39908	1.0871e-05	2.22062e-05
YJR137C	YJR137C	YJR137C	CDS	MET5	1826.66	1890.25	-0.0503734	0.0615644	-0.818222	0.413231	0.491486
YMR021C	YMR021C	YMR021C	CDS	MAC1	1267.75	1336.42	-0.0734448	0.0735034	-0.999203	0.317697	0.38916
YGR025W	YGR025W	YGR025W	CDS	YGR025W	258.557	271.121	-0.0734231	0.141059	-0.520513	0.602706	0.676084
YMR074C	YMR074C	YMR074C	CDS	YMR074C	3340.08	2483.74	0.426639	0.0503371	8.47564	2.33787e-17	8.29237e-17
YGR203W	YGR203W	YGR203W	CDS	YCH1	476.416	418.881	0.189047	0.105919	1.78482	0.0742899	0.104311
tN%28GUU%29F	tN%28GUU%29F	tN%28GUU%29F	noncoding_exon	tN%28GUU%29F	0.60905	2.66946	-2.05165	1.94401	-1.05537	0.291257	0.360152
YDL158C	YDL158C	YDL158C	CDS	YDL158C	148.578	266.1	-0.839673	0.333529	-2.51754	0.0118176	0.0185179
YOR104W	YOR104W	YOR104W	CDS	PIN2	1520.37	1236.67	0.29637	0.0678375	4.36883	1.24916e-05	2.53461e-05
YFL009W	YFL009W	YFL009W	CDS	CDC4	1953.06	2385.68	-0.287784	0.0531289	-5.41672	6.0702e-08	1.43175e-07
YLR297W	YLR297W	YLR297W	CDS	YLR297W	757.096	771.679	-0.0255913	0.0742196	-0.344805	0.730241	0.78923
YLR279W	YLR279W	YLR279W	CDS	YLR279W	7.64701	7.17162	0.115206	0.671762	0.171499	0.863832	0.898436
YDR216W	YDR216W	YDR216W	CDS	ADR1	15951.6	8302.26	0.941679	0.0417173	22.5729	8.00604e-113	1.46756e-111
YIL120W	YIL120W	YIL120W	CDS	QDR1	717.598	940.338	-0.389697	0.0733135	-5.31549	1.06368e-07	2.46885e-07
YNL021W	YNL021W	YNL021W	CDS	HDA1	1570.82	1456.99	0.107611	0.0628002	1.71354	0.0866126	0.120259
YGR095C	YGR095C	YGR095C	CDS	RRP46	804.376	1175.12	-0.545598	0.0777996	-7.01286	2.33497e-12	6.8461e-12
tN%28GUU%29G	tN%28GUU%29G	tN%28GUU%29G	noncoding_exon	tN%28GUU%29G	0.356291	2.11551	-2.49974	2.04793	-1.22062	0.222231	0.282039
tN%28GUU%29K	tN%28GUU%29K	tN%28GUU%29K	noncoding_exon	tN%28GUU%29K	2.2085	5.61559	-1.39438	1.20449	-1.15766	0.247004	0.310154
snR5	snR5	snR5	noncoding_exon	SNR5	489.02	303.793	0.685947	0.120008	5.71584	1.09162e-08	2.67035e-08
snR4	snR4	snR4	noncoding_exon	SNR4	713.121	867.89	-0.283266	0.0951004	-2.9786	0.00289569	0.0048486
snR6	snR6	snR6	noncoding_exon	SNR6	23.6536	45.7454	-0.980309	0.360071	-2.72254	0.00647812	0.0104512
snR9	snR9	snR9	noncoding_exon	SNR9	236.004	170.753	0.463443	0.161169	2.87551	0.00403377	0.0066553
snR8	snR8	snR8	noncoding_exon	SNR8	170.312	157.78	0.107537	0.188106	0.571683	0.567537	0.64434
YHR029C	YHR029C	YHR029C	CDS	YHI9	756.496	1396.36	-0.883592	0.0749514	-11.7889	4.45498e-32	2.41753e-31
YIR021W-A	YIR021W-A	YIR021W-A	CDS	YIR021W-A	27.5411	39.4682	-0.52363	0.330276	-1.58543	0.112869	0.15342
YAL033W	YAL033W	YAL033W	CDS	POP5	347.996	572.863	-0.724369	0.0979056	-7.39865	1.37579e-13	4.25342e-13
YBR284W	YBR284W	YBR284W	CDS	YBR284W	1099.03	968.56	0.181093	0.0724101	2.50093	0.0123868	0.0193793
YNR036C	YNR036C	YNR036C	CDS	MRPS12	7576.72	5779.36	0.391215	0.0573375	6.82303	8.9143e-12	2.55363e-11
YNR049C	YNR049C	YNR049C	CDS	MSO1	1301.66	1290.79	0.012767	0.0635257	0.200974	0.840719	0.877965
YDR192C	YDR192C	YDR192C	CDS	NUP42	1008.96	932.609	0.113636	0.0744174	1.52701	0.126759	0.170378
YOL112W	YOL112W	YOL112W	CDS	MSB4	1049.62	1620.91	-0.627623	0.0691043	-9.08226	1.06348e-19	4.06976e-19
tN%28GUU%29N1	tN%28GUU%29N1	tN%28GUU%29N1	noncoding_exon	tN%28GUU%29N1	0.356291	2.72909	-2.87675	1.98183	-1.45156	0.146624	0.194312
YOL083W	YOL083W	YOL083W	CDS	ATG34	3586.04	3566.09	0.00833143	0.044257	0.188251	0.85068	0.886474
YNL251C	YNL251C	YNL251C	CDS	NRD1	7183.13	4419.06	0.701598	0.0432389	16.2261	3.29864e-59	3.0554e-58
YBR266C	YBR266C	YBR266C	CDS	SLM6	3.86467	4.87472	-0.334786	0.942677	-0.355144	0.722482	0.783348
YBL004W	YBL004W	YBL004W	CDS	UTP20	1746.53	2819.89	-0.691433	0.0511207	-13.5255	1.10594e-41	7.44827e-41
YER145C-A	YER145C-A	YER145C-A	CDS	YER145C-A	9.39238	12.1079	-0.345365	0.69576	-0.496385	0.619623	0.691948
YBR164C	YBR164C	YBR164C	CDS	ARL1	1153.74	1469.3	-0.349881	0.0685467	-5.10427	3.32081e-07	7.47424e-07
YHR074W	YHR074W	YHR074W	CDS	QNS1	5079	4511.58	0.171234	0.0426881	4.01129	6.03879e-05	0.000117185
YDR464W	YDR464W	YDR464W	CDS	SPP41	3729.55	4949.54	-0.407252	0.0554763	-7.34102	2.1198e-13	6.49898e-13
YFR030W	YFR030W	YFR030W	CDS	MET10	2743.66	2720.71	0.0125194	0.0508238	0.24633	0.805426	0.853061
YJL146W	YJL146W	YJL146W	CDS	IDS2	1276.78	1199.93	0.0905551	0.0586902	1.54293	0.122847	0.16563
tN%28GUU%29N2	tN%28GUU%29N2	tN%28GUU%29N2	noncoding_exon	tN%28GUU%29N2	1.44691	0.613578	1.17125	2.41435	0.485122	0.62759	0.699349
YIL055C	YIL055C	YIL055C	CDS	YIL055C	4385.06	2559.78	0.775439	0.0493473	15.7139	1.2145e-55	1.06425e-54
YPL053C	YPL053C	YPL053C	CDS	KTR6	3033.01	2826.47	0.101194	0.0450704	2.24525	0.0247523	0.0373611
YLR351C	YLR351C	YLR351C	CDS	NIT3	4262.7	4225.89	0.0128988	0.0387445	0.33292	0.739194	0.795705
YJR111C	YJR111C	YJR111C	CDS	YJR111C	1077.4	1016.64	0.0827242	0.071978	1.1493	0.250433	0.313839
tN%28GUU%29O2	tN%28GUU%29O2	tN%28GUU%29O2	noncoding_exon	tN%28GUU%29O2	0	1.02794	-2.42779	2.60963	-0.93032	0.352205	0.426235
YKL032C	YKL032C	YKL032C	CDS	IXR1	6265	4271.48	0.55316	0.0493071	11.2187	3.30242e-29	1.67983e-28
YER125W	YER125W	YER125W	CDS	RSP5	7401.19	6134.37	0.270966	0.0453459	5.97554	2.2933e-09	5.83263e-09
YER152C	YER152C	YER152C	CDS	YER152C	5618.49	4499.12	0.321545	0.0504037	6.37941	1.77777e-10	4.76802e-10
YLR015W	YLR015W	YLR015W	CDS	BRE2	1282.66	1288.44	-0.00801253	0.0620485	-0.129133	0.897252	0.92566
YHR116W	YHR116W	YHR116W	CDS	COX23	784.024	582.154	0.4276	0.0764444	5.5936	2.22407e-08	5.35803e-08
YPL259C	YPL259C	YPL259C	CDS	APM1	2145.24	2020.85	0.0862509	0.0551108	1.56505	0.117572	0.159194
YOL100W	YOL100W	YOL100W	CDS	PKH2	4937.1	2960.88	0.737421	0.0428494	17.2096	2.24952e-66	2.34487e-65
YGR093W	YGR093W	YGR093W	CDS	DRN1	1560.12	1252.96	0.315248	0.0675726	4.66533	3.08124e-06	6.52102e-06
tP%28UGG%29H	tP%28UGG%29H	tP%28UGG%29H	noncoding_exon	SUF8	1.44691	0	2.93519	3.81608	0.769163	0.441796	0.520058
YLR334C	YLR334C	YLR334C	CDS	YLR334C	5.61335	5.65186	-0.028342	0.90437	-0.0313389	0.974999	0.988732
YHL043W	YHL043W	YHL043W	CDS	ECM34	15.0157	17.7756	-0.261292	0.504452	-0.517973	0.604477	0.677744
YOR364W	YOR364W	YOR364W	CDS	YOR364W	74.6347	42.1691	0.807642	0.268075	3.01274	0.00258898	0.00436118
YOR386W	YOR386W	YOR386W	CDS	PHR1	3523.39	1773.26	0.991706	0.0526639	18.8308	4.21974e-79	5.29096e-78
YCL011C	YCL011C	YCL011C	CDS	GBP2	6051.66	5437.64	0.154687	0.0372811	4.14921	3.33629e-05	6.58768e-05
YPR198W	YPR198W	YPR198W	CDS	SGE1	2273.34	1906.78	0.254565	0.0547846	4.64666	3.3736e-06	7.12034e-06
YHL038C	YHL038C	YHL038C	CDS	CBP2	1230.39	1233.22	-0.00490595	0.066549	-0.0737193	0.941234	0.961573
tQ%28CUG%29M	tQ%28CUG%29M	tQ%28CUG%29M	noncoding_exon	CDC65	0	2.05588	-3.42754	1.94153	-1.76538	0.0774999	0.108512
YDR425W	YDR425W	YDR425W	CDS	SNX41	3959.21	2414.23	0.713375	0.0487378	14.637	1.63141e-48	1.26037e-47
YOR331C	YOR331C	YOR331C	CDS	YOR331C	11.5612	12.564	-0.13077	0.576019	-0.227024	0.820405	0.863168
YML076C	YML076C	YML076C	CDS	WAR1	2108.77	2057.29	0.0353301	0.0558389	0.632715	0.52692	0.605862
YKR060W	YKR060W	YKR060W	CDS	UTP30	466.117	561.531	-0.271161	0.10245	-2.64677	0.00812654	0.0129609
tQ%28UUG%29B	tQ%28UUG%29B	tQ%28UUG%29B	noncoding_exon	tQ%28UUG%29B	0.380795	3.13177	-3.0684	1.82889	-1.67773	0.0933994	0.129092
YMR091C	YMR091C	YMR091C	CDS	NPL6	1206.62	1626.02	-0.430091	0.0658259	-6.53376	6.41374e-11	1.76075e-10
YER012W	YER012W	YER012W	CDS	PRE1	4887.28	4247.92	0.200934	0.0418969	4.79591	1.61941e-06	3.49828e-06
YHR098C	YHR098C	YHR098C	CDS	SFB3	2923.21	3282.34	-0.166227	0.0565031	-2.94192	0.00326186	0.00542788
YDL135C	YDL135C	YDL135C	CDS	RDI1	2560.23	2269.62	0.173007	0.0565631	3.05866	0.00222331	0.0037661
YCR093W	YCR093W	YCR093W	CDS	CDC39	7441.07	5410.28	0.459937	0.038305	12.0072	3.25577e-33	1.82052e-32
YGR273C	YGR273C	YGR273C	CDS	YGR273C	4.34293	6.64968	-0.607076	0.787744	-0.770651	0.440914	0.519107
YPR108W-A	YPR108W-A	YPR108W-A	CDS	YPR108W-A	1.83046	1.86282	-0.017086	2.0296	-0.00841841	0.993283	1
YBR069C	YBR069C	YBR069C	CDS	TAT1	4025.62	5795.25	-0.524988	0.0449251	-11.6859	1.50545e-31	8.06912e-31
YMR251W	YMR251W	YMR251W	CDS	GTO3	152.418	155.83	-0.0295038	0.153769	-0.191871	0.847843	0.884046
YCR104W	YCR104W	YCR104W	CDS	PAU3	37.0872	24.5452	0.592322	0.321008	1.8452	0.0650091	0.0921875
YDR512C	YDR512C	YDR512C	CDS	EMI1	2042.17	2122.86	-0.0566019	0.0806351	-0.701952	0.482709	0.562342
YPR012W	YPR012W	YPR012W	CDS	YPR012W	41.2613	47.6819	-0.203584	0.279277	-0.728969	0.466021	0.545174
YGR255C	YGR255C	YGR255C	CDS	COQ6	2949.92	2467.55	0.256101	0.0521513	4.91074	9.07338e-07	1.98897e-06
tQ%28UUG%29E1	tQ%28UUG%29E1	tQ%28UUG%29E1	noncoding_exon	tQ%28UUG%29E1	0.304525	5.00816	-3.75841	1.61507	-2.32709	0.0199603	0.0304771
YBL102W	YBL102W	YBL102W	CDS	SFT2	5546.46	3328.33	0.737003	0.0539779	13.6538	1.91604e-42	1.30425e-41
YPL237W	YPL237W	YPL237W	CDS	SUI3	5819.68	6899.94	-0.245009	0.0452478	-5.41483	6.13462e-08	1.44597e-07
YLR120C	YLR120C	YLR120C	CDS	YPS1	3580.62	3479.83	0.0421477	0.05301	0.79509	0.426561	0.504676
YCL001W-B	YCL001W-B	YCL001W-B	CDS	YCL001W-B	35.3619	29.4157	0.268007	0.333455	0.803726	0.421555	0.499515
YEL043W	YEL043W	YEL043W	CDS	YEL043W	4291.15	3939.3	0.124043	0.0542998	2.28441	0.0223475	0.0339293
YNL068C	YNL068C	YNL068C	CDS	FKH2	2017.81	2490.99	-0.30433	0.0487899	-6.23756	4.44448e-10	1.16957e-09
tQ%28UUG%29H	tQ%28UUG%29H	tQ%28UUG%29H	noncoding_exon	tQ%28UUG%29H	0	1.37653	-2.84836	2.43835	-1.16815	0.242746	0.305411
YJR080C	YJR080C	YJR080C	CDS	AIM24	6489.32	7106.2	-0.131096	0.0365383	-3.5879	0.000333347	0.000605015
tQ%28UUG%29Q	tQ%28UUG%29Q	tQ%28UUG%29Q	noncoding_exon	tQ%28UUG%29Q	2.13499	6.82303	-1.7052	0.907598	-1.8788	0.0602715	0.0859186
tR%28ACG%29D	tR%28ACG%29D	tR%28ACG%29D	noncoding_exon	tR%28ACG%29D	2.89658	10.604	-1.91178	0.833526	-2.29361	0.0218129	0.033161
tT%28AGU%29N2	tT%28AGU%29N2	tT%28AGU%29N2	noncoding_exon	tT%28AGU%29N2	0.356291	0	0.979243	4.40746	0.222178	0.824175	0.865439
YBR112C	YBR112C	YBR112C	CDS	CYC8	4308.94	3826.73	0.171497	0.0429795	3.99021	6.60137e-05	0.000127465
tR%28ACG%29E	tR%28ACG%29E	tR%28ACG%29E	noncoding_exon	tR%28ACG%29E	0.380795	1.94831	-2.40992	1.87681	-1.28405	0.199124	0.255876
YFL040W	YFL040W	YFL040W	CDS	YFL040W	21.8248	17.5752	0.328607	0.431666	0.761253	0.446506	0.524894
YNL326C	YNL326C	YNL326C	CDS	PFA3	529.325	567.164	-0.101058	0.105654	-0.956501	0.338819	0.412192
YDR337W	YDR337W	YDR337W	CDS	MRPS28	2890.93	3388.12	-0.228612	0.0461937	-4.94899	7.45979e-07	1.64195e-06
YJL061W	YJL061W	YJL061W	CDS	NUP82	1774.2	1948.23	-0.133486	0.0522193	-2.55627	0.0105802	0.0166424
YPR147C	YPR147C	YPR147C	CDS	YPR147C	1382.62	1322.29	0.0625282	0.061623	1.01469	0.310253	0.381413
YKL131W	YKL131W	YKL131W	CDS	YKL131W	26.0463	13.742	0.918396	0.424342	2.16428	0.0304427	0.0453234
YDR441C	YDR441C	YDR441C	CDS	APT2	760.749	1248.78	-0.715938	0.06479	-11.0501	2.1892e-28	1.09837e-27
YPL094C	YPL094C	YPL094C	CDS	SEC62	3343.15	3837.56	-0.199271	0.0494912	-4.0264	5.6637e-05	0.00011012
YPL023C	YPL023C	YPL023C	CDS	MET12	4678.94	3503.34	0.41801	0.0396208	10.5503	5.06444e-26	2.38343e-25
YER020W	YER020W	YER020W	CDS	GPA2	11242.1	9489.27	0.24498	0.0441735	5.54586	2.92516e-08	7.01074e-08
YDR231C	YDR231C	YDR231C	CDS	COX20	8583.85	6001.25	0.516867	0.0387533	13.3374	1.40336e-40	9.22888e-40
YJL112W	YJL112W	YJL112W	CDS	MDV1	5384.39	4631.18	0.216974	0.0355667	6.10047	1.05756e-09	2.73656e-09
YFL066C	YFL066C	YFL066C	CDS	YFL066C	1.29437	1.74295	-0.393711	1.78616	-0.220424	0.825541	0.866744
YNL193W	YNL193W	YNL193W	CDS	YNL193W	1752.37	1438.32	0.283531	0.0602461	4.70621	2.52363e-06	5.38005e-06
tP%28UGG%29O1	tP%28UGG%29O1	tP%28UGG%29O1	noncoding_exon	tP%28UGG%29O1	0	0
YML058W	YML058W	YML058W	CDS	SML1	14570.5	12128.2	0.26491	0.0331302	7.99605	1.28475e-15	4.30346e-15
YBR188C	YBR188C	YBR188C	CDS	NTC20	533.368	719.663	-0.434613	0.0890043	-4.88306	1.04454e-06	2.28161e-06
tR%28ACG%29J	tR%28ACG%29J	tR%28ACG%29J	noncoding_exon	tR%28ACG%29J	0.304525	5.55407	-3.89665	1.61042	-2.41965	0.0155353	0.024036
YJR076C	YJR076C	YJR076C	CDS	CDC11	1944.52	3003.18	-0.62591	0.0618091	-10.1265	4.21448e-24	1.86173e-23
YKL157W	YKL157W	YKL157W	CDS	APE2	15206.5	12163.3	0.32208	0.0332532	9.68569	3.46875e-22	1.43517e-21
YBR003W	YBR003W	YBR003W	CDS	COQ1	3280.6	2661.16	0.300998	0.0446267	6.74479	1.53249e-11	4.33316e-11
YOL140W	YOL140W	YOL140W	CDS	ARG8	2123.12	1937.29	0.13251	0.0621922	2.13066	0.0331172	0.0490854
YPR129W	YPR129W	YPR129W	CDS	SCD6	4173.17	4045.01	0.0455822	0.0410839	1.10949	0.267219	0.332725
YDL113C	YDL113C	YDL113C	CDS	ATG20	3587.54	2970.62	0.273297	0.0456507	5.9867	2.14138e-09	5.45818e-09
YMR135C	YMR135C	YMR135C	CDS	GID8	13227.6	9071.52	0.544121	0.0364618	14.9231	2.33343e-50	1.85611e-49
tR%28ACG%29L	tR%28ACG%29L	tR%28ACG%29L	noncoding_exon	tR%28ACG%29L	2.00695	0.721153	1.53364	1.73346	0.884728	0.376304	0.452108
YPL005W	YPL005W	YPL005W	CDS	AEP3	875.981	791.229	0.145659	0.0772601	1.88531	0.0593877	0.0847321
YBR247C	YBR247C	YBR247C	CDS	ENP1	695.005	1376.89	-0.984863	0.0703485	-13.9998	1.56364e-44	1.10755e-43
tR%28ACG%29O	tR%28ACG%29O	tR%28ACG%29O	noncoding_exon	tR%28ACG%29O	1.3979	0.306789	1.9227	2.02446	0.949736	0.342247	0.415617
YJL210W	YJL210W	YJL210W	CDS	PEX2	2022.34	1409.18	0.522945	0.0669698	7.80867	5.77924e-15	1.88345e-14
YAL010C	YAL010C	YAL010C	CDS	MDM10	1091.57	1017.28	0.102353	0.0665245	1.53857	0.12391	0.166879
YIL154C	YIL154C	YIL154C	CDS	IMP2%27	4811.49	4616.64	0.0605239	0.0592433	1.02162	0.306962	0.3779
tP%28UGG%29O3	tP%28UGG%29O3	tP%28UGG%29O3	noncoding_exon	tP%28UGG%29O3	0	0
YIL101C	YIL101C	YIL101C	CDS	XBP1	6691.54	7507.11	-0.165627	0.0420078	-3.94277	8.05475e-05	0.000153827
YKL004W	YKL004W	YKL004W	CDS	AUR1	3565.09	3513.78	0.0210149	0.0450104	0.46689	0.640578	0.710691
YOR208W	YOR208W	YOR208W	CDS	PTP2	3186.96	2574.89	0.307535	0.0456314	6.73956	1.58869e-11	4.48843e-11
YPL154C	YPL154C	YPL154C	CDS	PEP4	46668.6	30952.3	0.592589	0.0397051	14.9248	2.27446e-50	1.81127e-49
YPL101W	YPL101W	YPL101W	CDS	ELP4	1568.05	1700.57	-0.117006	0.0585169	-1.99953	0.0455515	0.0663051
tR%28ACG%29Q2	tR%28ACG%29Q2	tR%28ACG%29Q2	noncoding_exon	tR%28ACG%29Q2	0.304525	2.40447	-2.69157	1.97691	-1.3615	0.173355	0.225626
YBR178W	YBR178W	YBR178W	CDS	YBR178W	38.6861	28.9576	0.41649	0.351636	1.18443	0.236241	0.29814
YJR098C	YJR098C	YJR098C	CDS	YJR098C	733.771	875.936	-0.253699	0.0797256	-3.18216	0.00146183	0.00251526
YHR176W	YHR176W	YHR176W	CDS	FMO1	653.025	870.826	-0.414091	0.0762613	-5.4299	5.63855e-08	1.33219e-07
tV%28AAC%29H	tV%28AAC%29H	tV%28AAC%29H	noncoding_exon	tV%28AAC%29H	0	0	0	4.40746	0	1	1
tV%28AAC%29J	tV%28AAC%29J	tV%28AAC%29J	noncoding_exon	tV%28AAC%29J	0	0	0	4.40746	0	1	1
tR%28CCG%29L	tR%28CCG%29L	tR%28CCG%29L	noncoding_exon	TRR4	1.3979	0.372564	1.9208	1.84228	1.04262	0.297124	0.366628
tV%28AAC%29O	tV%28AAC%29O	tV%28AAC%29O	noncoding_exon	tV%28AAC%29O	3.0213	4.12959	-0.431782	1.02978	-0.419296	0.675	0.741109
YJR018W	YJR018W	YJR018W	CDS	YJR018W	7.33973	14.2658	-0.934476	0.536345	-1.7423	0.0814552	0.113686
tR%28UCU%29D	tR%28UCU%29D	tR%28UCU%29D	noncoding_exon	tR%28UCU%29D	0.304525	1.04577	-1.48944	3.33448	-0.446679	0.655107	0.723362
YDL244W	YDL244W	YDL244W	CDS	THI13	226.651	296.207	-0.391357	0.150438	-2.60145	0.00928311	0.0147181
tR%28UCU%29E	tR%28UCU%29E	tR%28UCU%29E	noncoding_exon	tR%28UCU%29E	0	1.02794	-2.42744	2.43433	-0.997171	0.318681	0.390126
tR%28UCU%29G1	tR%28UCU%29G1	tR%28UCU%29G1	noncoding_exon	tR%28UCU%29G1	0.761589	2.18932	-1.59193	2.21484	-0.718757	0.47229	0.55161
tR%28UCU%29G2	tR%28UCU%29G2	tR%28UCU%29G2	noncoding_exon	tR%28UCU%29G2	1.42241	4.06382	-1.54702	1.14344	-1.35295	0.176071	0.228906
YDR319C	YDR319C	YDR319C	CDS	YFT2	1836.94	1741.49	0.0753672	0.0678533	1.11074	0.266681	0.332174
YKL095W	YKL095W	YKL095W	CDS	YJU2	814.513	981.684	-0.271047	0.0728236	-3.72196	0.00019768	0.000364852
YOL099C	YOL099C	YOL099C	CDS	YOL099C	9.77704	14.9869	-0.626696	0.516456	-1.21345	0.224956	0.285177
YIL094C	YIL094C	YIL094C	CDS	LYS12	3680.1	4198.83	-0.191238	0.0424847	-4.50134	6.75251e-06	1.39649e-05
YLR451W	YLR451W	YLR451W	CDS	LEU3	1578.76	1863.75	-0.240659	0.0605313	-3.97578	7.01495e-05	0.000134965
YFR017C	YFR017C	YFR017C	CDS	IGD1	22239	12768.2	0.800753	0.0535064	14.9655	1.23305e-50	9.8531e-50
YLR342W-A	YLR342W-A	YLR342W-A	CDS	YLR342W-A	77.8281	140.349	-0.85027	0.159786	-5.32132	1.03017e-07	2.39664e-07
YHR017W	YHR017W	YHR017W	CDS	YSC83	2453.51	2011.28	0.286439	0.0498157	5.74997	8.92569e-09	2.19651e-08
YNR077C	YNR077C	YNR077C	CDS	YNR077C	1.47417	1.84073	-0.334483	3.82017	-0.0875571	0.930229	0.952598
YOL044W	YOL044W	YOL044W	CDS	PEX15	1211.96	1130	0.0989617	0.0667508	1.48255	0.138193	0.184222
YLR323C	YLR323C	YLR323C	CDS	CWC24	653.233	798.286	-0.285913	0.0769757	-3.71433	0.000203741	0.000375641
YOR085W	YOR085W	YOR085W	CDS	OST3	2314.69	2429.56	-0.069135	0.0558644	-1.23755	0.215883	0.274882
YGL067W	YGL067W	YGL067W	CDS	NPY1	942.114	1069.18	-0.183383	0.0755602	-2.42698	0.0152252	0.023598
YOR050C	YOR050C	YOR050C	CDS	YOR050C	4.51997	5.86275	-0.4017	0.889461	-0.451622	0.651541	0.720451
YNL087W	YNL087W	YNL087W	CDS	TCB2	1137.05	1563.01	-0.45667	0.071648	-6.3738	1.84396e-10	4.93796e-10
YGR114C	YGR114C	YGR114C	CDS	YGR114C	0	0	0	4.40746	0	1	1
YLR318W	YLR318W	YLR318W	CDS	EST2	609.395	688.354	-0.176587	0.0828635	-2.13106	0.0330843	0.0490471
tR%28UCU%29J1	tR%28UCU%29J1	tR%28UCU%29J1	noncoding_exon	tR%28UCU%29J1	0	0.655378	-1.79301	3.18011	-0.563819	0.572877	0.648959
YNL024C-A	YNL024C-A	YNL024C-A	CDS	KSH1	1086.16	941.765	0.206855	0.0689093	3.00185	0.00268346	0.00450729
YDR296W	YDR296W	YDR296W	CDS	MHR1	4426.95	4136.99	0.0973272	0.0408876	2.38036	0.0172957	0.0265771
YGL232W	YGL232W	YGL232W	CDS	TAN1	1090.03	1198.15	-0.137245	0.0760683	-1.80424	0.0711941	0.100256
YPR091C	YPR091C	YPR091C	CDS	NVJ2	3933.71	2622.97	0.584716	0.0575326	10.1632	2.89405e-24	1.28575e-23
YGR141W	YGR141W	YGR141W	CDS	VPS62	3638.93	3417.39	0.0906638	0.0410942	2.20625	0.0273668	0.0410062
YAR030C	YAR030C	YAR030C	CDS	YAR030C	38.9187	44.1701	-0.164603	0.28987	-0.567853	0.570135	0.64644
STRG.906					18187.9	23464.1	-0.367452	0.322245	-1.14029	0.254167	0.318061
YJR158W	YJR158W	YJR158W	CDS	HXT16	0	0	0	4.40746	0	1	1
tR%28UCU%29J2	tR%28UCU%29J2	tR%28UCU%29J2	noncoding_exon	tR%28UCU%29J2	0	1.31076	-2.78881	2.8752	-0.969957	0.332068	0.405023
YBR116C	YBR116C	YBR116C	CDS	YBR116C	216.268	383.879	-0.831427	0.15466	-5.37584	7.62274e-08	1.78409e-07
tR%28UCU%29K	tR%28UCU%29K	tR%28UCU%29K	noncoding_exon	tR%28UCU%29K	0.737085	3.67343	-2.39188	1.45855	-1.6399	0.101026	0.138781
YCR003W	YCR003W	YCR003W	CDS	MRPL32	1082.18	1385.51	-0.357993	0.0729656	-4.90633	9.27968e-07	2.03291e-06
YMR316C-B	YMR316C-B	YMR316C-B	CDS	YMR316C-B	310.459	213.013	0.546597	0.134056	4.07739	4.55444e-05	8.91486e-05
YMR316C-A	YMR316C-A	YMR316C-A	CDS	YMR316C-A	20.3234	19.9631	0.0325904	0.385631	0.0845118	0.932649	0.954377
YMR163C	YMR163C	YMR163C	CDS	INP2	547.218	567.893	-0.0523768	0.0823428	-0.636082	0.524723	0.603634
YGR294W	YGR294W	YGR294W	CDS	PAU12	24.4408	41.3691	-0.754336	0.373762	-2.01822	0.0435681	0.0635637
tR%28UCU%29Q1	tR%28UCU%29Q1	tR%28UCU%29Q1	noncoding_exon	tR%28UCU%29Q1	1.14238	8.91456	-3.03981	1.37568	-2.20967	0.0271281	0.040666
YLL067C	YLL067C	YLL067C	CDS	YLL067C	64.5581	70.8832	-0.142255	0.224824	-0.632741	0.526903	0.605862
tS%28AGA%29A	tS%28AGA%29A	tS%28AGA%29A	noncoding_exon	tS%28AGA%29A	0	1.33473	-2.81372	2.25156	-1.24968	0.211417	0.269785
YBR020W	YBR020W	YBR020W	CDS	GAL1	517.991	335	0.628768	0.0964139	6.52155	6.95846e-11	1.90505e-10
YLR418C	YLR418C	YLR418C	CDS	CDC73	1725.55	1679.37	0.0406957	0.0655597	0.620742	0.534769	0.613474
tS%28AGA%29B	tS%28AGA%29B	tS%28AGA%29B	noncoding_exon	tS%28AGA%29B	2.23576	0.697179	1.67279	2.03651	0.821403	0.411417	0.489519
YER059W	YER059W	YER059W	CDS	PCL6	2026.37	1914.08	0.0807094	0.0672543	1.20006	0.230115	0.290987
YPL153C	YPL153C	YPL153C	CDS	RAD53	334.673	627.221	-0.905441	0.0916635	-9.87787	5.19228e-23	2.22199e-22
YBL025W	YBL025W	YBL025W	CDS	RRN10	364.715	352.655	0.0486405	0.11636	0.418016	0.675935	0.741903
YOL066C	YOL066C	YOL066C	CDS	RIB2	1474.45	1189.86	0.309584	0.0603944	5.12604	2.95895e-07	6.677e-07
YDR126W	YDR126W	YDR126W	CDS	SWF1	602.14	458.607	0.39361	0.102235	3.85004	0.000118098	0.000222018
YPL216W	YPL216W	YPL216W	CDS	YPL216W	912.507	635.251	0.52001	0.0758142	6.85901	6.93412e-12	2.00115e-11
YOR223W	YOR223W	YOR223W	CDS	DSC3	2295.67	1676.58	0.453658	0.0506097	8.96386	3.13512e-19	1.181e-18
YEL022W	YEL022W	YEL022W	CDS	GEA2	1088.97	1611.93	-0.567596	0.0726676	-7.81085	5.68032e-15	1.85207e-14
tS%28AGA%29D2	tS%28AGA%29D2	tS%28AGA%29D2	noncoding_exon	tS%28AGA%29D2	3.48112	10.4823	-1.59004	0.878132	-1.81071	0.0701863	0.0990264
YDL074C	YDL074C	YDL074C	CDS	BRE1	1774.92	1700.47	0.0622015	0.0627918	0.9906	0.321881	0.393836
YLR463C	YLR463C	YLR463C	CDS	YLR463C	40.0683	20.983	0.944539	0.378095	2.49815	0.0124844	0.0195189
tS%28AGA%29E	tS%28AGA%29E	tS%28AGA%29E	noncoding_exon	tS%28AGA%29E	1.11788	4.29126	-1.98816	1.32602	-1.49934	0.133785	0.178926
YMR218C	YMR218C	YMR218C	CDS	TRS130	1328	1512.61	-0.188364	0.0608174	-3.0972	0.00195355	0.00333015
YNL265C	YNL265C	YNL265C	CDS	IST1	3155.28	2766.46	0.189806	0.0589216	3.22134	0.00127594	0.00220846
YNL230C	YNL230C	YNL230C	CDS	ELA1	865.997	750.243	0.207743	0.0750393	2.76846	0.00563227	0.00913935
YLL049W	YLL049W	YLL049W	CDS	LDB18	1087.71	1093.72	-0.00829955	0.0662361	-0.125302	0.900284	0.928057
YHR211W	YHR211W	YHR211W	CDS	FLO5	1384.49	887.043	0.644723	0.0730631	8.82419	1.10252e-18	4.06763e-18
YPR166C	YPR166C	YPR166C	CDS	MRP2	1699.8	1899.4	-0.161712	0.0604903	-2.67335	0.00750983	0.0120295
YJL042W	YJL042W	YJL042W	CDS	MHP1	12144.5	7931.07	0.614946	0.0464837	13.2293	5.94392e-40	3.85444e-39
tS%28AGA%29H	tS%28AGA%29H	tS%28AGA%29H	noncoding_exon	tS%28AGA%29H	0	3.01805	-3.989	1.75636	-2.27118	0.0231363	0.0350583
YDR445C	YDR445C	YDR445C	CDS	YDR445C	0	0	0	4.40746	0	1	1
YMR058W	YMR058W	YMR058W	CDS	FET3	2726.08	3838.42	-0.4931	0.0490268	-10.0578	8.49006e-24	3.73156e-23
YDR061W	YDR061W	YDR061W	CDS	YDR061W	2656.84	2465.76	0.107761	0.0477714	2.25577	0.0240848	0.0364402
YJR112W-A	YJR112W-A	YJR112W-A	CDS	YJR112W-A	675.131	704.111	-0.0597001	0.0780911	-0.764493	0.444574	0.522975
YOR290C	YOR290C	YOR290C	CDS	SNF2	5357	5111.23	0.0681663	0.0384208	1.7742	0.0760296	0.10656
YKL114C	YKL114C	YKL114C	CDS	APN1	1738.79	1886.8	-0.118948	0.0659181	-1.80447	0.071157	0.100234
tS%28AGA%29M	tS%28AGA%29M	tS%28AGA%29M	noncoding_exon	tS%28AGA%29M	0	1.37653	-2.84613	1.94085	-1.46644	0.142529	0.189388
tS%28UGA%29Q2	tS%28UGA%29Q2	tS%28UGA%29Q2	noncoding_exon	tS%28UGA%29Q2	4.16368	20.6763	-2.32664	0.659095	-3.53005	0.000415474	0.000748239
tT%28AGU%29B	tT%28AGU%29B	tT%28AGU%29B	noncoding_exon	tT%28AGU%29B	0	2.39832	-3.6517	2.39182	-1.52675	0.126824	0.170433
YDR276C	YDR276C	YDR276C	CDS	PMP3	17033.3	9875.13	0.786393	0.0306983	25.6169	9.89867e-145	2.49575e-143
YLR200W	YLR200W	YLR200W	CDS	YKE2	1296.39	1466.16	-0.17876	0.0694298	-2.57468	0.0100332	0.0158318
YKR003W	YKR003W	YKR003W	CDS	OSH6	1931.19	1251.46	0.623854	0.069463	8.9811	2.68076e-19	1.01257e-18
YLR107W	YLR107W	YLR107W	CDS	REX3	2338.93	1309.76	0.835296	0.0511525	16.3295	6.08434e-60	5.73455e-59
tT%28AGU%29C	tT%28AGU%29C	tT%28AGU%29C	noncoding_exon	tT%28AGU%29C	0	5.81906	-4.92905	1.52821	-3.22537	0.00125808	0.0021781
YER175C	YER175C	YER175C	CDS	TMT1	3452.16	2167.42	0.670891	0.0595524	11.2655	1.94139e-29	9.94035e-29
tT%28AGU%29D	tT%28AGU%29D	tT%28AGU%29D	noncoding_exon	tT%28AGU%29D	0	1.40051	-2.87083	2.95603	-0.971177	0.33146	0.404423
YDL183C	YDL183C	YDL183C	CDS	YDL183C	1579.94	1518.78	0.0580896	0.0581322	0.999268	0.317665	0.38916
YPL278C	YPL278C	YPL278C	CDS	YPL278C	389.09	219.916	0.82083	0.121023	6.78241	1.1819e-11	3.36227e-11
YMR105W-A	YMR105W-A	YMR105W-A	CDS	YMR105W-A	51.0356	37.9583	0.422568	0.257463	1.64128	0.10074	0.138432
YMR118C	YMR118C	YMR118C	CDS	SHH3	3123.65	3808.31	-0.286941	0.0455616	-6.29786	3.01788e-10	8.02012e-10
YCL049C	YCL049C	YCL049C	CDS	YCL049C	4914.65	2869.29	0.777337	0.0466451	16.6649	2.35851e-62	2.30698e-61
YBL066C	YBL066C	YBL066C	CDS	SEF1	7602.24	5106.23	0.574735	0.0374949	15.3284	4.94323e-53	4.13951e-52
YGL107C	YGL107C	YGL107C	CDS	RMD9	1727.18	1651.32	0.065386	0.0598335	1.0928	0.274482	0.341039
tT%28AGU%29I1	tT%28AGU%29I1	tT%28AGU%29I1	noncoding_exon	tT%28AGU%29I1	0.761589	4.10562	-2.52758	1.45561	-1.73644	0.0824858	0.115055
YDR169C	YDR169C	YDR169C	CDS	STB3	4348.55	3449.47	0.333357	0.0468739	7.11177	1.14565e-12	3.40269e-12
YLR410W-B	YLR410W-B	YLR410W-B	CDS	YLR410W-B	356.395	244.411	0.541444	0.123801	4.37349	1.22274e-05	2.48245e-05
YLR410W-A	YLR410W-A	YLR410W-A	CDS	YLR410W-A	18.4662	21.5548	-0.220012	0.44846	-0.490595	0.623713	0.695913
YLR169W	YLR169W	YLR169W	CDS	YLR169W	1.78145	0.920366	0.892689	2.01381	0.443284	0.657561	0.725727
YMR272C	YMR272C	YMR272C	CDS	SCS7	14081.3	13001.5	0.115362	0.0378195	3.05033	0.00228588	0.00386738
YPR108W	YPR108W	YPR108W	CDS	RPN7	4459.68	3527.87	0.338397	0.0392995	8.61073	7.25949e-18	2.61882e-17
YKL054C	YKL054C	YKL054C	CDS	DEF1	9392.83	7993.55	0.233132	0.0380775	6.12255	9.20879e-10	2.39086e-09
YGR162W	YGR162W	YGR162W	CDS	TIF4631	4018.74	4486.32	-0.158852	0.0478273	-3.32137	0.000895775	0.00156991
YDL165W	YDL165W	YDL165W	CDS	CDC36	1859.96	1884.53	-0.0190839	0.0567013	-0.336569	0.736442	0.793966
YDR520C	YDR520C	YDR520C	CDS	URC2	1009.59	828.598	0.283003	0.0753659	3.75505	0.000173308	0.000321312
YKL023W	YKL023W	YKL023W	CDS	YKL023W	3621.34	2671.17	0.438688	0.0551773	7.9505	1.8576e-15	6.17196e-15
YJR051W	YJR051W	YJR051W	CDS	OSM1	4826.5	4622.45	0.0626112	0.0437614	1.43074	0.152505	0.201075
tT%28AGU%29N1	tT%28AGU%29N1	tT%28AGU%29N1	noncoding_exon	tT%28AGU%29N1	1.09338	4.96447	-2.21563	1.3403	-1.65309	0.0983131	0.135428
YFL034W	YFL034W	YFL034W	CDS	YFL034W	1968.5	1695.99	0.216263	0.0554631	3.89923	9.64979e-05	0.00018259
YKL164C	YKL164C	YKL164C	CDS	PIR1	4486.87	8577.57	-0.934122	0.0507072	-18.4219	8.76953e-76	1.02762e-74
YJR135C	YJR135C	YJR135C	CDS	MCM22	485.624	460.843	0.0701023	0.0988461	0.709207	0.478196	0.55755
YLR375W	YLR375W	YLR375W	CDS	STP3	6083.69	4527.12	0.42702	0.0558656	7.6437	2.11062e-14	6.74009e-14
tT%28UAG%29Q2	tT%28UAG%29Q2	tT%28UAG%29Q2	noncoding_exon	tT%28UAG%29Q2	0	0.655378	-1.80347	2.36021	-0.764115	0.444799	0.523152
tT%28UGU%29G2	tT%28UGU%29G2	tT%28UGU%29G2	noncoding_exon	tT%28UGU%29G2	0.60905	4.41856	-2.72981	1.42247	-1.91906	0.0549769	0.0788903
tT%28UGU%29P	tT%28UGU%29P	tT%28UGU%29P	noncoding_exon	tT%28UGU%29P	2.43951	6.25125	-1.35863	1.06671	-1.27367	0.202781	0.259953
tT%28UGU%29Q1	tT%28UGU%29Q1	tT%28UGU%29Q1	noncoding_exon	tT%28UGU%29Q1	3.25287	18.4433	-2.5453	0.731974	-3.4773	0.000506486	0.00090468
YMR183C	YMR183C	YMR183C	CDS	SSO2	2348.74	2867.63	-0.286778	0.0473795	-6.05279	1.42359e-09	3.66201e-09
YNL027W	YNL027W	YNL027W	CDS	CRZ1	2630.52	2461.77	0.0940652	0.0508896	1.84842	0.064542	0.0916181
YJR154W	YJR154W	YJR154W	CDS	YJR154W	192.167	364.063	-0.921668	0.128189	-7.18992	6.48302e-13	1.94742e-12
YLR291C	YLR291C	YLR291C	CDS	GCD7	2040.04	2052.48	-0.00861913	0.0470832	-0.183062	0.85475	0.890184
YDR210W	YDR210W	YDR210W	CDS	YDR210W	1117.26	698.369	0.677629	0.0764954	8.85843	8.11499e-19	3.01303e-18
YIL122W	YIL122W	YIL122W	CDS	POG1	1443.64	1365.47	0.0802536	0.0532635	1.50673	0.13188	0.17665
YDL230W	YDL230W	YDL230W	CDS	PTP1	2905.69	1905.13	0.610084	0.0679566	8.97756	2.76832e-19	1.04451e-18
YJR113C	YJR113C	YJR113C	CDS	RSM7	4546.56	3707	0.294744	0.0461413	6.38786	1.68225e-10	4.51704e-10
YGL075C	YGL075C	YGL075C	CDS	MPS2	494.481	568.399	-0.203767	0.0917014	-2.22207	0.0262787	0.0394747
tV%28AAC%29G1	tV%28AAC%29G1	tV%28AAC%29G1	noncoding_exon	tV%28AAC%29G1	0	2.18743	-3.50098	2.11218	-1.65752	0.0974138	0.134295
YIL156W-B	YIL156W-B	YIL156W-B	CDS	YIL156W-B	1839.79	1505	0.289846	0.0670989	4.31968	1.56255e-05	3.14401e-05
YIL156W-A	YIL156W-A	YIL156W-A	CDS	YIL156W-A	17.8806	16.5608	0.129235	0.457724	0.282342	0.777681	0.828577
YLR416C	YLR416C	YLR416C	CDS	YLR416C	49.5948	37.9577	0.378849	0.28429	1.33261	0.182659	0.236721
YGR097W	YGR097W	YGR097W	CDS	ASK10	3995.56	2948.06	0.439714	0.0451643	9.73588	2.11969e-22	8.85929e-22
YIL068C	YIL068C	YIL068C	CDS	SEC6	1927.24	1453.18	0.406386	0.0599467	6.77912	1.2091e-11	3.43546e-11
YCL025C	YCL025C	YCL025C	CDS	AGP1	22140.8	13898.4	0.6721	0.0519592	12.9352	2.85054e-38	1.78549e-37
YNR034W	YNR034W	YNR034W	CDS	SOL1	3654.28	2309.13	0.661826	0.0557085	11.8801	1.50106e-32	8.25463e-32
tV%28AAC%29G3	tV%28AAC%29G3	tV%28AAC%29G3	noncoding_exon	tV%28AAC%29G3	0	1.09372	-2.48637	2.13959	-1.16207	0.245205	0.308172
YNL282W	YNL282W	YNL282W	CDS	POP3	109.876	206.332	-0.908986	0.152444	-5.96277	2.48e-09	6.28687e-09
YNL253W	YNL253W	YNL253W	CDS	TEX1	1014.84	959.965	0.0807046	0.0791781	1.01928	0.30807	0.379197
YGL144C	YGL144C	YGL144C	CDS	ROG1	218.396	307.683	-0.495411	0.119237	-4.15483	3.25525e-05	6.43495e-05
YDR190C	YDR190C	YDR190C	CDS	RVB1	3384.78	4329.74	-0.355336	0.0419405	-8.47237	2.40447e-17	8.51993e-17
YAL031C	YAL031C	YAL031C	CDS	GIP4	3045.56	1714.82	0.829289	0.0485713	17.0736	2.33218e-65	2.38826e-64
YBL006C	YBL006C	YBL006C	CDS	LDB7	2118.76	1866.15	0.183917	0.053649	3.42815	0.000607701	0.00107584
tV%28AAC%29K1	tV%28AAC%29K1	tV%28AAC%29K1	noncoding_exon	tV%28AAC%29K1	0.660816	1.74909	-1.35609	1.7309	-0.783461	0.433356	0.511589
YBR264C	YBR264C	YBR264C	CDS	YPT10	1461.9	1064.67	0.457795	0.0729632	6.27432	3.51161e-10	9.29332e-10
YBR231C	YBR231C	YBR231C	CDS	SWC5	920.014	1065.46	-0.210193	0.0743649	-2.82651	0.00470586	0.0077005
YLR162W-A	YLR162W-A	YLR162W-A	CDS	RRT15	60.6224	44.3043	0.450194	0.323793	1.39038	0.164414	0.215031
YPL197C	YPL197C	YPL197C	CDS	YPL197C	11.643	9.31299	0.293799	0.569176	0.516183	0.605727	0.678927
YHR076W	YHR076W	YHR076W	CDS	PTC7	1644.47	1899.11	-0.208051	0.056342	-3.69265	0.000221932	0.000408426
YDR462W	YDR462W	YDR462W	CDS	MRPL28	3343.78	2709.97	0.302977	0.0540856	5.60181	2.12125e-08	5.11384e-08
tV%28AAC%29K2	tV%28AAC%29K2	tV%28AAC%29K2	noncoding_exon	tV%28AAC%29K2	0.761589	2.11551	-1.52778	1.94535	-0.785354	0.432246	0.510537
tV%28AAC%29L	tV%28AAC%29L	tV%28AAC%29L	noncoding_exon	tV%28AAC%29L	2.7958	6.47444	-1.22188	0.90988	-1.3429	0.179305	0.232893
YPL055C	YPL055C	YPL055C	CDS	LGE1	3503.09	2844.48	0.300993	0.0553699	5.43604	5.44771e-08	1.28754e-07
YLR353W	YLR353W	YLR353W	CDS	BUD8	810.944	1097.12	-0.432307	0.0715049	-6.04584	1.48637e-09	3.81646e-09
tV%28AAC%29M1	tV%28AAC%29M1	tV%28AAC%29M1	noncoding_exon	tV%28AAC%29M1	0.304525	1.68332	-2.18417	2.01052	-1.08637	0.277313	0.344251
tV%28AAC%29M2	tV%28AAC%29M2	tV%28AAC%29M2	noncoding_exon	tV%28AAC%29M2	2.87207	10.1638	-1.84675	0.820481	-2.25081	0.0243974	0.0368893
tV%28AAC%29M3	tV%28AAC%29M3	tV%28AAC%29M3	noncoding_exon	tV%28AAC%29M3	1.01711	2.45242	-1.24468	1.53023	-0.813392	0.415993	0.494266
tS%28AGA%29G	tS%28AGA%29G	tS%28AGA%29G	noncoding_exon	tS%28AGA%29G	0	0.348589	-0.944331	4.40746	-0.214257	0.830346	0.869176
tV%28UAC%29D	tV%28UAC%29D	tV%28UAC%29D	noncoding_exon	tV%28UAC%29D	2.9968	8.44672	-1.4745	0.897928	-1.64211	0.100567	0.13826
tW%28UCA%29Q	tW%28UCA%29Q	tW%28UCA%29Q	noncoding_exon	tW%28UCA%29Q	0.356291	1.68332	-2.18314	2.22708	-0.980272	0.326952	0.399201
YAL003W	YAL003W	YAL003W	CDS	EFB1	5518.7	12464.7	-1.17475	0.0409339	-28.6986	3.96836e-181	1.34539e-179
tS%28AGA%29L	tS%28AGA%29L	tS%28AGA%29L	noncoding_exon	tS%28AGA%29L	0	0.348589	-0.944331	4.40746	-0.214257	0.830346	0.869176
YAL004W	YAL004W	YAL004W	CDS	YAL004W	2.51302	5.4883	-1.15636	0.968604	-1.19384	0.232542	0.29379
YAL016C-A	YAL016C-A	YAL016C-A	CDS	YAL016C-A	146.448	24.6786	2.55971	0.252655	10.1312	4.01591e-24	1.77738e-23
tS%28AGA%29J	tS%28AGA%29J	tS%28AGA%29J	noncoding_exon	tS%28AGA%29J	3.53013	3.39061	0.0370216	0.912331	0.0405791	0.967631	0.983092
YHR114W	YHR114W	YHR114W	CDS	BZZ1	1984.31	1890.79	0.0684723	0.0535439	1.27881	0.200966	0.257957
YGR028W	YGR028W	YGR028W	CDS	MSP1	3281.99	2401.55	0.450021	0.0501204	8.9788	2.73727e-19	1.03336e-18
YER150W	YER150W	YER150W	CDS	SPI1	49810.5	32735.3	0.605652	0.0514537	11.7708	5.51807e-32	2.98283e-31
YAL018C	YAL018C	YAL018C	CDS	LDS1	58.0686	147.557	-1.35069	0.190991	-7.072	1.52721e-12	4.50805e-12
YDR400W	YDR400W	YDR400W	CDS	URH1	420.456	483.948	-0.202083	0.0905185	-2.23251	0.0255816	0.0384881
YLR156C-A	YLR156C-A	YLR156C-A	CDS	YLR156C-A	0	0
YDL068W	YDL068W	YDL068W	CDS	YDL068W	6.19845	11.5361	-0.933423	0.697666	-1.33792	0.180922	0.2346
YOL027C	YOL027C	YOL027C	CDS	MDM38	7603.55	7722.18	-0.0222356	0.0420363	-0.528961	0.596832	0.671328
YPL257W	YPL257W	YPL257W	CDS	YPL257W	461.876	306.22	0.590356	0.0996844	5.92225	3.17563e-09	7.99229e-09
YPL120W	YPL120W	YPL120W	CDS	VPS30	1373.23	1181.89	0.218029	0.0696041	3.13241	0.00173376	0.00296997
YOL145C	YOL145C	YOL145C	CDS	CTR9	3641.08	4105.5	-0.173174	0.05281	-3.27918	0.00104108	0.00181365
YJL099W	YJL099W	YJL099W	CDS	CHS6	1942.24	1517.38	0.35539	0.0635816	5.5895	2.27718e-08	5.48408e-08
YAL025C	YAL025C	YAL025C	CDS	MAK16	393.957	1601.92	-2.01792	0.0739011	-27.3057	3.63122e-164	1.06556e-162
YDR395W	YDR395W	YDR395W	CDS	SXM1	2046.25	2492.76	-0.284002	0.0461292	-6.15666	7.42945e-10	1.93754e-09
YOL110W	YOL110W	YOL110W	CDS	SHR5	1721.05	1245.64	0.468004	0.0811757	5.76532	8.15053e-09	2.01071e-08
YDR005C	YDR005C	YDR005C	CDS	MAF1	1782.2	2078.78	-0.220838	0.051049	-4.326	1.51841e-05	3.05785e-05
YMR311C	YMR311C	YMR311C	CDS	GLC8	18328.4	12969.8	0.498713	0.0440218	11.3288	9.45174e-30	4.88247e-29
YAL037C-B	YAL037C-B	YAL037C-B	CDS	YAL037C-B	36.5293	97.7713	-1.42091	0.334611	-4.24644	2.1719e-05	4.3314e-05
YAL042C-A	YAL042C-A	YAL042C-A	CDS	YAL042C-A	111.476	40.04	1.46445	0.218662	6.69733	2.12256e-11	5.97053e-11
YGR188C	YGR188C	YGR188C	CDS	BUB1	528.739	576.025	-0.12141	0.0844768	-1.4372	0.150662	0.19902
YOR362C	YOR362C	YOR362C	CDS	PRE10	6044.31	5232.44	0.208725	0.0382497	5.4569	4.84515e-08	1.14863e-07
YPR106W	YPR106W	YPR106W	CDS	ISR1	2050.2	1168.09	0.810134	0.0601344	13.4721	2.28371e-41	1.53066e-40
YLR126C	YLR126C	YLR126C	CDS	YLR126C	327.334	612.356	-0.902127	0.093532	-9.64512	5.15526e-22	2.12165e-21
YDL053C	YDL053C	YDL053C	CDS	PBP4	3565.47	4257.03	-0.254394	0.0513274	-4.95629	7.18519e-07	1.58501e-06
YML074C	YML074C	YML074C	CDS	FPR3	15384.7	21734.9	-0.498419	0.0540693	-9.21815	3.02259e-20	1.17734e-19
YKR062W	YKR062W	YKR062W	CDS	TFA2	2869.81	2317.84	0.307185	0.0550801	5.57706	2.44623e-08	5.88106e-08
YNL286W	YNL286W	YNL286W	CDS	CUS2	1125.09	1252.85	-0.157964	0.0820097	-1.92616	0.0540838	0.0776725
YER010C	YER010C	YER010C	CDS	YER010C	1768.57	1965.21	-0.153247	0.0668401	-2.29275	0.0218627	0.0332294
YML003W	YML003W	YML003W	CDS	YML003W	468.839	421.038	0.15689	0.10658	1.47204	0.14101	0.187655
YMR097C	YMR097C	YMR097C	CDS	MTG1	2756.24	2408.29	0.193721	0.0480178	4.03436	5.47509e-05	0.000106631
YDL133W	YDL133W	YDL133W	CDS	SRF1	1381.49	1306.01	0.0803459	0.0705219	1.1393	0.254576	0.318517
YAL059W	YAL059W	YAL059W	CDS	ECM1	311.981	789.687	-1.33479	0.0857239	-15.5708	1.15007e-54	9.91612e-54
YAL062W	YAL062W	YAL062W	CDS	GDH3	19415.2	41477.7	-1.09506	0.0468641	-23.3667	9.31887e-121	1.8702e-119
YHR096C	YHR096C	YHR096C	CDS	HXT5	22677.2	20586.9	0.139604	0.0456404	3.05879	0.00222235	0.0037661
YGL249W	YGL249W	YGL249W	CDS	ZIP2	237.479	141.095	0.741508	0.164575	4.50559	6.61895e-06	1.37009e-05
YMR253C	YMR253C	YMR253C	CDS	YMR253C	921.772	1326.69	-0.524712	0.0694002	-7.56066	4.01024e-14	1.26674e-13
YCR102C	YCR102C	YCR102C	CDS	YCR102C	406.319	241.114	0.749849	0.11809	6.34981	2.15574e-10	5.76185e-10
YJL127C-B	YJL127C-B	YJL127C-B	CDS	YJL127C-B	2183.5	1271.7	0.778468	0.0713016	10.918	9.45952e-28	4.65249e-27
YOR257W	YOR257W	YOR257W	CDS	CDC31	5130.58	3284.54	0.642727	0.054544	11.7836	4.74065e-32	2.56855e-31
YGR002C	YGR002C	YGR002C	CDS	SWC4	2212.34	1645.93	0.425864	0.0521373	8.16813	3.13199e-16	1.06962e-15
YAL067C	YAL067C	YAL067C	CDS	SEO1	88.4995	613.085	-2.80297	0.142595	-19.6568	5.05443e-86	7.06002e-85
YAL068C	YAL068C	YAL068C	CDS	PAU8	2.08322	6.89495	-1.72815	0.919849	-1.87873	0.0602808	0.0859186
YGR253C	YGR253C	YGR253C	CDS	PUP2	10449.6	7023.73	0.57319	0.0338984	16.9091	3.85728e-64	3.87615e-63
YDR510W	YDR510W	YDR510W	CDS	SMT3	5768.67	5579.74	0.0478609	0.0510245	0.938	0.348244	0.422168
YAL068W-A	YAL068W-A	YAL068W-A	CDS	YAL068W-A	0.304525	3.89662	-3.40182	1.83173	-1.85717	0.0632876	0.0899656
YDR467C	YDR467C	YDR467C	CDS	YDR467C	28.8091	24.8999	0.209665	0.52447	0.399765	0.689329	0.754944
Q0115	Q0115	Q0115	CDS	BI3	0	0	0	4.40746	0
YPR045C	YPR045C	YPR045C	CDS	THP3	2313.63	1887.98	0.292667	0.0541553	5.40422	6.50913e-08	1.53115e-07
YAR008W	YAR008W	YAR008W	CDS	SEN34	104.001	397.042	-1.94156	0.138953	-13.9728	2.28523e-44	1.61213e-43
YPL231W	YPL231W	YPL231W	CDS	FAS2	20930.1	41626.5	-0.991724	0.0420331	-23.5939	4.45511e-123	9.01869e-122
YLR148W	YLR148W	YLR148W	CDS	PEP3	3438.52	2473.38	0.474699	0.0533091	8.90464	5.35579e-19	1.99812e-18
YMR137C	YMR137C	YMR137C	CDS	PSO2	1685.15	2153.62	-0.35545	0.0559827	-6.34928	2.16321e-10	5.77959e-10
YAR009C	YAR009C	YAR009C	CDS	YAR009C	1354.75	624.945	1.116	0.16215	6.88251	5.88067e-12	1.70417e-11
YKL155C	YKL155C	YKL155C	CDS	RSM22	1345.39	1504.02	-0.161445	0.0695093	-2.32263	0.0201988	0.0308346
YBR162W-A	YBR162W-A	YBR162W-A	CDS	YSY6	816.949	1565.47	-0.938805	0.0633523	-14.8188	1.1075e-49	8.72018e-49
YFL042C	YFL042C	YFL042C	CDS	YFL042C	6647.46	4208.71	0.659517	0.0399209	16.5206	2.60828e-61	2.49196e-60
YBL083C	YBL083C	YBL083C	CDS	YBL083C	13.6684	19.2105	-0.471159	0.448239	-1.05113	0.293198	0.362103
YDR148C	YDR148C	YDR148C	CDS	KGD2	37746.8	36583.2	0.045249	0.0355696	1.27213	0.203328	0.26051
YAR010C	YAR010C	YAR010C	CDS	YAR010C	1.72693	4.22549	-1.28322	1.37753	-0.931538	0.351575	0.42562
YPL096W	YPL096W	YPL096W	CDS	PNG1	2031.77	1680.59	0.27367	0.0585013	4.67802	2.89665e-06	6.14339e-06
YAR018C	YAR018C	YAR018C	CDS	KIN3	905.456	1885.78	-1.05709	0.0776388	-13.6154	3.24266e-42	2.19871e-41
YDR335W	YDR335W	YDR335W	CDS	MSN5	7734.49	4735.95	0.706873	0.0381021	18.5521	7.84863e-77	9.41835e-76
tT%28UGU%29G1	tT%28UGU%29G1	tT%28UGU%29G1	noncoding_exon	tT%28UGU%29G1	0	0.306789	-0.944337	2.90166	-0.325447	0.744843	0.800777
YJL067W	YJL067W	YJL067W	CDS	YJL067W	9.34779	9.29328	-0.00815473	0.661264	-0.012332	0.990161	1
YMR039C	YMR039C	YMR039C	CDS	SUB1	6711.87	7614.1	-0.182337	0.0552776	-3.29856	0.000971822	0.0016985
YAR023C	YAR023C	YAR023C	CDS	YAR023C	733.278	306.494	1.25836	0.0896557	14.0355	9.45319e-45	6.72313e-44
YDR443C	YDR443C	YDR443C	CDS	SSN2	3225.83	2003.99	0.687939	0.0529418	12.9942	1.3191e-38	8.32215e-38
YCR095C	YCR095C	YCR095C	CDS	OCA4	1359.94	1342.28	0.0173278	0.0707928	0.244768	0.806636	0.853438
YAR035C-A	YAR035C-A	YAR035C-A	CDS	YAR035C-A	3.81291	1.42448	1.4589	1.13793	1.28207	0.19982	0.256581
YCR077C	YCR077C	YCR077C	CDS	PAT1	5355.86	7108.82	-0.408676	0.050507	-8.09148	5.89462e-16	1.99845e-15
YLR437C	YLR437C	YLR437C	CDS	DIF1	332.135	363.391	-0.128498	0.105783	-1.21474	0.224466	0.284669
YAR035W	YAR035W	YAR035W	CDS	YAT1	52245.8	16598.9	1.65432	0.123154	13.4329	3.878e-41	2.58434e-40
YNL191W	YNL191W	YNL191W	CDS	DUG3	870.237	904.439	-0.0545051	0.0883927	-0.616624	0.537483	0.6158
YDR237W	YDR237W	YDR237W	CDS	MRPL7	2959.95	2987.48	-0.0133832	0.0452183	-0.295969	0.767254	0.819593
YJL110C	YJL110C	YJL110C	CDS	GZF3	1336.9	1821.48	-0.446245	0.0558648	-7.98794	1.37213e-15	4.58953e-15
YKR048C	YKR048C	YKR048C	CDS	NAP1	14826.8	11709.6	0.340894	0.0407197	8.37172	5.67838e-17	1.98786e-16
YAR064W	YAR064W	YAR064W	CDS	YAR064W	0.712581	1.46628	-1.02663	1.78339	-0.575662	0.564843	0.641755
YPL003W	YPL003W	YPL003W	CDS	ULA1	1671.68	1126.34	0.569674	0.0554973	10.2649	1.01438e-24	4.59135e-24
YAR066W	YAR066W	YAR066W	CDS	YAR066W	0	1.11769	-2.49921	2.00083	-1.24908	0.211634	0.269964
YJR094C	YJR094C	YJR094C	CDS	IME1	597.998	932.764	-0.644598	0.0730187	-8.82784	1.06713e-18	3.93911e-18
YJR074W	YJR074W	YJR074W	CDS	MOG1	1283.2	1677.61	-0.385397	0.0564347	-6.82908	8.54618e-12	2.45019e-11
YPR127W	YPR127W	YPR127W	CDS	YPR127W	5373.58	7592.97	-0.498565	0.0453488	-10.994	4.08395e-28	2.03585e-27
YAR068W	YAR068W	YAR068W	CDS	YAR068W	1.90342	3.97407	-1.01409	1.06788	-0.949629	0.342301	0.415617
YAL012W	YAL012W	YAL012W	CDS	CYS3	2505.79	4754.07	-0.923229	0.060312	-15.3076	6.80657e-53	5.69306e-52
YMR288W	YMR288W	YMR288W	CDS	HSH155	1960.09	1674.56	0.227839	0.0583511	3.90463	9.43691e-05	0.000178902
YIL156W	YIL156W	YIL156W	CDS	UBP7	2031.23	1760.56	0.207752	0.0545402	3.80916	0.000139439	0.000260456
YAR070C	YAR070C	YAR070C	CDS	YAR070C	0	2.10383	-3.45863	2.8006	-1.23496	0.216846	0.275906
YHR063W-A	YHR063W-A	YHR063W-A	CDS	YHR063W-A	2.74128	4.37061	-0.678222	0.984533	-0.688877	0.490901	0.570553
YJL212C	YJL212C	YJL212C	CDS	OPT1	1347.58	839.774	0.684571	0.071758	9.54	1.42833e-21	5.82e-21
YPL156C	YPL156C	YPL156C	CDS	PRM4	7960.06	4142.07	0.942782	0.0420931	22.3975	4.16017e-111	7.50766e-110
YAR075W	YAR075W	YAR075W	CDS	YAR075W	5.36335	16.9427	-1.70151	0.607276	-2.80187	0.00508072	0.00828092
YLR187W	YLR187W	YLR187W	CDS	SKG3	767.207	948.935	-0.309464	0.0702132	-4.40749	1.04577e-05	2.1387e-05
YDR099W	YDR099W	YDR099W	CDS	BMH2	28978.9	18817.5	0.622784	0.0299978	20.761	9.75755e-96	1.50767e-94
YBL009W	YBL009W	YBL009W	CDS	ALK2	353.233	1015.91	-1.52218	0.0799495	-19.0392	8.07299e-81	1.03834e-79
YKL188C	YKL188C	YKL188C	CDS	PXA2	1827.43	1309.03	0.482464	0.0604825	7.97692	1.5003e-15	5.01346e-15
YBL012C	YBL012C	YBL012C	CDS	YBL012C	0.712581	2.3387	-1.75143	1.61483	-1.08459	0.278104	0.344988
YDR259C	YDR259C	YDR259C	CDS	YAP6	2477.78	1320.74	0.906124	0.0787982	11.4993	1.32981e-30	6.97251e-30
YKL068W	YKL068W	YKL068W	CDS	NUP100	2453.21	1814	0.436555	0.0520351	8.38961	4.87745e-17	1.7109e-16
YOR032C	YOR032C	YOR032C	CDS	HMS1	301.417	320.084	-0.0870092	0.114238	-0.761651	0.446268	0.524703
YBL018C	YBL018C	YBL018C	CDS	POP8	163.453	402.337	-1.29389	0.133141	-9.71818	2.52243e-22	1.04736e-21
YMR002W	YMR002W	YMR002W	CDS	MIX17	9357.01	13103.9	-0.485678	0.0555973	-8.73564	2.42272e-18	8.84952e-18
YBL027W	YBL027W	YBL027W	CDS	RPL19B	2964.73	8679.33	-1.54889	0.0421892	-36.713	4.53706e-295	3.72786e-293
YLR261C	YLR261C	YLR261C	CDS	VPS63	514.603	684.898	-0.408404	0.0902521	-4.52515	6.0354e-06	1.25338e-05
YDL246C	YDL246C	YDL246C	CDS	SOR2	17.9166	14.8653	0.242339	0.501606	0.483125	0.629007	0.700468
tI%28UAU%29L	tI%28UAU%29L	tI%28UAU%29L	noncoding_exon	tI%28UAU%29L	0	0
YER081W	YER081W	YER081W	CDS	SER3	5862.98	4884.67	0.263377	1.20615	0.218361	0.827148	0.868269
YPL178W	YPL178W	YPL178W	CDS	CBC2	2924.33	3607.11	-0.302798	0.0475361	-6.36985	1.89215e-10	5.06509e-10
tI%28UAU%29D	tI%28UAU%29D	tI%28UAU%29D	noncoding_exon	tI%28UAU%29D	0	0
YBL028C	YBL028C	YBL028C	CDS	YBL028C	196.003	645.681	-1.71885	0.125475	-13.6988	1.03275e-42	7.08519e-42
YBL031W	YBL031W	YBL031W	CDS	SHE1	149.723	346.492	-1.21354	0.145026	-8.36777	5.87204e-17	2.0536e-16
YNR075W	YNR075W	YNR075W	CDS	COS10	250.254	460.577	-0.881947	0.123243	-7.15615	8.29771e-13	2.48079e-12
YOL046C	YOL046C	YOL046C	CDS	YOL046C	16.9268	13.7057	0.306573	0.514527	0.595835	0.551286	0.629012
YFR011C	YFR011C	YFR011C	CDS	MIC19	4550.55	4695.36	-0.0459474	0.0426597	-1.07707	0.281449	0.348766
YIL074C	YIL074C	YIL074C	CDS	SER33	1167.09	1452.39	-0.315355	0.0698496	-4.51476	6.33875e-06	1.31409e-05
YGL173C	YGL173C	YGL173C	CDS	XRN1	10367.1	9356.57	0.148134	0.0376959	3.92973	8.50427e-05	0.000162013
YHL008C	YHL008C	YHL008C	CDS	YHL008C	2558.84	2672.49	-0.0628047	0.0439688	-1.42839	0.153179	0.201812
YLR457C	YLR457C	YLR457C	CDS	NBP1	676.472	853.114	-0.337663	0.0771974	-4.37401	1.21983e-05	2.47727e-05
YNL249C	YNL249C	YNL249C	CDS	MPA43	396.822	348.378	0.190797	0.107952	1.76742	0.0771574	0.108054
YGR056W	YGR056W	YGR056W	CDS	RSC1	1490.13	1759.87	-0.241578	0.0530674	-4.55228	5.30676e-06	1.10634e-05
YGL065C	YGL065C	YGL065C	CDS	ALG2	976.702	1442.87	-0.564329	0.059877	-9.42481	4.30889e-21	1.73049e-20
YOR052C	YOR052C	YOR052C	CDS	TMC1	5685.67	4651.04	0.289978	0.0496775	5.83722	5.30798e-09	1.3216e-08
YPL078C	YPL078C	YPL078C	CDS	ATP4	27217	27808.2	-0.0308967	0.0440751	-0.701002	0.483302	0.562845
YGR116W	YGR116W	YGR116W	CDS	SPT6	6506.42	5501.48	0.242121	0.0566812	4.27164	1.94043e-05	3.87642e-05
YOR343C	YOR343C	YOR343C	CDS	YOR343C	931.351	486.444	0.940813	0.105479	8.91942	4.68723e-19	1.7515e-18
YGL230C	YGL230C	YGL230C	CDS	YGL230C	48.6696	48.3005	0.00024664	0.267115	0.000923347	0.999263	1
YOL159C	YOL159C	YOL159C	CDS	YOL159C	1492.78	1101.32	0.438435	0.0614043	7.14014	9.3236e-13	2.77917e-12
YBR185C	YBR185C	YBR185C	CDS	MBA1	1856.14	2480.77	-0.419257	0.058651	-7.14832	8.78445e-13	2.62182e-12
YBR129C	YBR129C	YBR129C	CDS	OPY1	1478.35	1089.39	0.437658	0.0739216	5.92057	3.20821e-09	8.07137e-09
YDR290W	YDR290W	YDR290W	CDS	YDR290W	0	0	0	4.40746	0	1	1
YDR019C	YDR019C	YDR019C	CDS	GCV1	16549	9124.15	0.859383	0.0371267	23.1473	1.54705e-118	3.00127e-117
YBR150C	YBR150C	YBR150C	CDS	TBS1	2331.37	1773.7	0.394513	0.0469303	8.40637	4.22889e-17	1.48564e-16
YFL031C-A	YFL031C-A	YFL031C-A	CDS	YFL031C-A	2.18399	2.56189	-0.310312	1.12495	-0.275844	0.782668	0.833001
YER119C	YER119C	YER119C	CDS	AVT6	4212.57	3637.46	0.212829	0.0565439	3.76396	0.000167242	0.000310808
YMR196W	YMR196W	YMR196W	CDS	YMR196W	11341.4	8651.48	0.390617	0.0398739	9.79632	1.16767e-22	4.91561e-22
YMR161W	YMR161W	YMR161W	CDS	HLJ1	1096.51	1274.35	-0.217678	0.0621774	-3.50091	0.000463666	0.000832026
YDR499W	YDR499W	YDR499W	CDS	LCD1	878.083	1058.3	-0.268558	0.0758557	-3.54038	0.000399552	0.000720493
YKL068W-A	YKL068W-A	YKL068W-A	CDS	YKL068W-A	177.898	350.612	-0.981331	0.123604	-7.93933	2.03275e-15	6.7411e-15
YJL133C-A	YJL133C-A	YJL133C-A	CDS	YJL133C-A	14468.4	8379.79	0.787992	0.0432744	18.2092	4.3626e-74	4.99482e-73
YHL046W-A	YHL046W-A	YHL046W-A	CDS	YHL046W-A	2.15949	3.03588	-0.520477	1.27786	-0.407303	0.683786	0.749578
YBL039C	YBL039C	YBL039C	CDS	URA7	162.529	1110.08	-2.77697	0.106604	-26.0494	1.36501e-149	3.58392e-148
YJR120W	YJR120W	YJR120W	CDS	YJR120W	2667.67	2045.56	0.383061	0.563565	0.67971	0.496688	0.576703
YLL061W	YLL061W	YLL061W	CDS	MMP1	666.845	553.846	0.26735	0.0960113	2.78456	0.00535999	0.00871575
YDR110W	YDR110W	YDR110W	CDS	FOB1	570.583	623.614	-0.128352	0.100269	-1.28007	0.200519	0.257431
YDR419W	YDR419W	YDR419W	CDS	RAD30	851.526	708.833	0.262773	0.0788239	3.33368	0.000857063	0.00150395
YOR221C	YOR221C	YOR221C	CDS	MCT1	2803.88	2451.25	0.19343	0.050303	3.8453	0.000120407	0.000226298
YPL214C	YPL214C	YPL214C	CDS	THI6	1891.37	1736.61	0.12464	0.0579022	2.15259	0.0313511	0.0466063
YBL108C-A	YBL108C-A	YBL108C-A	CDS	PAU9	2.18675	3.49819	-0.700357	1.16072	-0.603381	0.546255	0.624394
YGL165C	YGL165C	YGL165C	CDS	YGL165C	51.7482	46.3091	0.154508	0.263451	0.58648	0.557553	0.635125
YOL064C	YOL064C	YOL064C	CDS	MET22	772.998	1059.49	-0.451938	0.0747443	-6.04645	1.48071e-09	3.80473e-09
YBL023C	YBL023C	YBL023C	CDS	MCM2	617.32	979.913	-0.664463	0.0818838	-8.1147	4.86967e-16	1.65498e-15
YOR274W	YOR274W	YOR274W	CDS	MOD5	1115.2	1114.58	-0.000934116	0.0648188	-0.0144112	0.988502	0.998943
YBL042C	YBL042C	YBL042C	CDS	FUI1	6902.84	1279.77	2.43374	0.0569286	42.7507	0	0
YOR329C	YOR329C	YOR329C	CDS	SCD5	5572.68	3624.19	0.621093	0.0376872	16.4802	5.09055e-61	4.85688e-60
YLR005W	YLR005W	YLR005W	CDS	SSL1	3295.82	2407.29	0.452754	0.0476657	9.49853	2.12876e-21	8.62869e-21
YDR124W	YDR124W	YDR124W	CDS	YDR124W	179.351	319.302	-0.834927	0.13317	-6.26963	3.61914e-10	9.57065e-10
YNL267W	YNL267W	YNL267W	CDS	PIK1	3662.65	3044.25	0.267109	0.0439583	6.07642	1.22892e-09	3.1694e-09
YBL053W	YBL053W	YBL053W	CDS	YBL053W	4.95198	21.2482	-2.09126	0.777019	-2.69138	0.00711567	0.0114296
YLL047W	YLL047W	YLL047W	CDS	YLL047W	52.7653	47.3352	0.168531	0.319369	0.527699	0.597708	0.671989
YLR461W	YLR461W	YLR461W	CDS	PAU4	18.4423	14.315	0.332731	0.44977	0.73978	0.459433	0.538279
YLR050C	YLR050C	YLR050C	CDS	YLR050C	777.744	1014.13	-0.380195	0.0698082	-5.44628	5.14353e-08	1.21771e-07
YOR124C	YOR124C	YOR124C	CDS	UBP2	5167.69	3865.89	0.418781	0.0421136	9.94408	2.67636e-23	1.15168e-22
YDR067C	YDR067C	YDR067C	CDS	OCA6	1794.26	1250.02	0.519404	0.0832897	6.23612	4.48549e-10	1.17991e-09
YOR296W	YOR296W	YOR296W	CDS	YOR296W	1414.56	975.574	0.535385	0.0597772	8.95635	3.35614e-19	1.26221e-18
YHR032W-A	YHR032W-A	YHR032W-A	CDS	YHR032W-A	203.122	207.964	-0.0305501	0.160228	-0.190666	0.848787	0.884765
YJL044C	YJL044C	YJL044C	CDS	GYP6	2990.12	2579.99	0.212077	0.0474702	4.46759	7.9107e-06	1.63312e-05
YPR164W	YPR164W	YPR164W	CDS	MMS1	1026.49	1589.23	-0.630535	0.0763664	-8.2567	1.49749e-16	5.17234e-16
YNL104C	YNL104C	YNL104C	CDS	LEU4	45212.6	44296.1	0.0296667	0.0351854	0.843153	0.399143	0.476678
YEL060C	YEL060C	YEL060C	CDS	PRB1	52235.7	32622.7	0.679257	0.0446499	15.213	2.90115e-52	2.38653e-51
YDR532C	YDR532C	YDR532C	CDS	KRE28	1723.85	1508.07	0.191327	0.0713264	2.68241	0.00730943	0.0117273
YBL065W	YBL065W	YBL065W	CDS	YBL065W	98.3335	24.2961	2.03627	0.266559	7.6391	2.18745e-14	6.98226e-14
YLR101C	YLR101C	YLR101C	CDS	YLR101C	158.99	120.116	0.404432	0.166888	2.42337	0.0153775	0.0238182
YBL107W-A	YBL107W-A	YBL107W-A	CDS	YBL107W-A	0.761589	0.348589	0.991345	2.22887	0.444775	0.656482	0.724676
YBL071C	YBL071C	YBL071C	CDS	YBL071C	2.89602	10.3132	-1.76761	0.869266	-2.03346	0.0420064	0.0614908
YPR066W	YPR066W	YPR066W	CDS	UBA3	829.264	484.903	0.77701	0.0968633	8.02172	1.04272e-15	3.5028e-15
YDR229W	YDR229W	YDR229W	CDS	IVY1	2913.36	2841.27	0.0351338	0.048814	0.719749	0.47168	0.551056
YDL181W	YDL181W	YDL181W	CDS	INH1	10789.9	9531.44	0.178685	0.0587725	3.04028	0.00236356	0.0039959
tY%28GUA%29F2	tY%28GUA%29F2	tY%28GUA%29F2	noncoding_exon	SUP6	0	0
tY%28GUA%29F1	tY%28GUA%29F1	tY%28GUA%29F1	noncoding_exon	SUP11	0	0
YBR022W	YBR022W	YBR022W	CDS	POA1	423.364	493.959	-0.22194	0.10023	-2.21431	0.0268076	0.0402286
YER177W	YER177W	YER177W	CDS	BMH1	27746.1	34562.7	-0.317021	0.0379787	-8.34734	6.9816e-17	2.43554e-16
YML048W	YML048W	YML048W	CDS	GSF2	5679.09	5433.7	0.0646614	0.0410554	1.57498	0.115261	0.156338
YBL064C	YBL064C	YBL064C	CDS	PRX1	24364	18936.3	0.363658	0.0285896	12.7199	4.58241e-37	2.78534e-36
YIL045W	YIL045W	YIL045W	CDS	PIG2	11993.9	6269.6	0.935187	0.0379235	24.6598	2.88712e-134	6.52544e-133
YKL221W	YKL221W	YKL221W	CDS	MCH2	191.775	162.185	0.242833	0.154945	1.56722	0.117063	0.158628
YGL126W	YGL126W	YGL126W	CDS	SCS3	823.614	1271.31	-0.625217	0.0891078	-7.01641	2.27636e-12	6.67708e-12
YBL072C	YBL072C	YBL072C	CDS	RPS8A	2673.8	6000.07	-1.16541	0.0526724	-22.1257	1.78979e-108	3.12497e-107
YMR270C	YMR270C	YMR270C	CDS	RRN9	969.346	1163.15	-0.263969	0.0868582	-3.03908	0.002373	0.00400993
YLR293C	YLR293C	YLR293C	CDS	GSP1	4953.55	9616.88	-0.957009	0.0416525	-22.976	8.10009e-117	1.55843e-115
YLR228C	YLR228C	YLR228C	CDS	ECM22	3012.87	1738.13	0.793249	0.0455317	17.4219	5.62697e-68	5.99982e-67
YJR053W	YJR053W	YJR053W	CDS	BFA1	236.924	283.801	-0.262913	0.127149	-2.06776	0.0386631	0.0569188
YJL171C	YJL171C	YJL171C	CDS	YJL171C	4285.32	4479.29	-0.0640284	0.0371826	-1.722	0.0850698	0.118281
YDR374C	YDR374C	YDR374C	CDS	PHO92	180.327	190.975	-0.0836189	0.163532	-0.511332	0.609119	0.682291
YIR002C	YIR002C	YIR002C	CDS	MPH1	3221.45	2538.87	0.343384	0.0687149	4.99722	5.81625e-07	1.28914e-06
YDL167C	YDL167C	YDL167C	CDS	NRP1	556.561	1021.95	-0.88019	0.076785	-11.463	2.02269e-30	1.055e-29
YBL073W	YBL073W	YBL073W	CDS	YBL073W	6.83697	0.745127	3.28397	1.47785	2.22213	0.0262748	0.0394747
YLR373C	YLR373C	YLR373C	CDS	VID22	1357.53	1609.01	-0.244723	0.051957	-4.71012	2.47575e-06	5.2812e-06
YJR035W	YJR035W	YJR035W	CDS	RAD26	3212.64	2118.62	0.599465	0.0600337	9.98548	1.76448e-23	7.68275e-23
YKR054C	YKR054C	YKR054C	CDS	DYN1	3660.34	3031.02	0.271892	0.0505332	5.38047	7.42936e-08	1.74058e-07
YIR034C	YIR034C	YIR034C	CDS	LYS1	4858.73	2733.05	0.831335	0.0486229	17.0976	1.54603e-65	1.58786e-64
YGL013C	YGL013C	YGL013C	CDS	PDR1	1930.22	1852.35	0.0597951	0.0489171	1.22238	0.221565	0.281245
YMR070W	YMR070W	YMR070W	CDS	MOT3	2136.74	2533.2	-0.24564	0.0656219	-3.74326	0.000181651	0.000336155
YGR207C	YGR207C	YGR207C	CDS	CIR1	3479.79	3787.22	-0.122954	0.0493232	-2.49282	0.0126735	0.0197791
YDR212W	YDR212W	YDR212W	CDS	TCP1	3907.72	4316.79	-0.143174	0.0507918	-2.81884	0.00481983	0.00787961
YLR456W	YLR456W	YLR456W	CDS	YLR456W	616.921	706.382	-0.198984	0.0797428	-2.49532	0.0125844	0.0196576
YNL052W	YNL052W	YNL052W	CDS	COX5A	32242.3	35601.8	-0.14299	0.03711	-3.85314	0.000116614	0.000219405
YDR514C	YDR514C	YDR514C	CDS	YDR514C	318.359	504.128	-0.664645	0.103353	-6.4308	1.26934e-10	3.4334e-10
YNL025C	YNL025C	YNL025C	CDS	SSN8	1293.83	975.454	0.40669	0.0632695	6.42789	1.29388e-10	3.49845e-10
YGR121W-A	YGR121W-A	YGR121W-A	CDS	YGR121W-A	35.2611	24.6152	0.538124	0.347746	1.54746	0.121752	0.164248
YGR091W	YGR091W	YGR091W	CDS	PRP31	745.823	761.968	-0.0278955	0.0837346	-0.333142	0.739027	0.795647
YDL232W	YDL232W	YDL232W	CDS	OST4	508.065	566	-0.15422	0.0955143	-1.61463	0.106392	0.145324
YPL119C	YPL119C	YPL119C	CDS	DBP1	3885.9	2391.75	0.700393	0.0486928	14.3839	6.52886e-47	4.87153e-46
YLR242C	YLR242C	YLR242C	CDS	ARV1	459.571	491.078	-0.0943645	0.0900561	-1.04784	0.294712	0.363844
YMR031W-A	YMR031W-A	YMR031W-A	CDS	YMR031W-A	13.468	7.14764	0.8998	0.601647	1.49556	0.134768	0.180104
YBL075C	YBL075C	YBL075C	CDS	SSA3	96245.6	20538.9	2.22826	0.0357683	62.2971	0	0
YBL077W	YBL077W	YBL077W	CDS	YBL077W	0.761589	2.81884	-1.97051	1.47211	-1.33856	0.180713	0.23447
YMR195W	YMR195W	YMR195W	CDS	ICY1	1998.09	1985.13	0.00933772	0.0729313	0.128034	0.898122	0.926375
YOL087C	YOL087C	YOL087C	CDS	DUF1	5767.65	4160.92	0.471221	0.0450412	10.462	1.29079e-25	6.01795e-25
YBL081W	YBL081W	YBL081W	CDS	YBL081W	393.305	927.754	-1.23269	0.0896784	-13.7457	5.4059e-43	3.73072e-42
YAL037W	YAL037W	YAL037W	CDS	YAL037W	113.362	123.424	-0.118459	0.189951	-0.62363	0.532871	0.611597
YGL146C	YGL146C	YGL146C	CDS	RRT6	2346.43	1693.46	0.468752	0.056066	8.36072	6.23357e-17	2.17785e-16
YCR051W	YCR051W	YCR051W	CDS	YCR051W	2082.91	2356.14	-0.177305	0.0628351	-2.82175	0.00477621	0.00781378
YBR262C	YBR262C	YBR262C	CDS	MIC12	3633.68	3479.4	0.062337	0.0520249	1.19821	0.230833	0.29179
YPL199C	YPL199C	YPL199C	CDS	YPL199C	1616.54	1891.48	-0.225807	0.0574293	-3.93192	8.42698e-05	0.000160628
YML101C-A	YML101C-A	YML101C-A	CDS	YML101C-A	34.6342	26.6287	0.38643	0.323395	1.19492	0.23212	0.29331
YFL036W	YFL036W	YFL036W	CDS	RPO41	6188.6	5024.32	0.30065	0.0483423	6.21919	4.99718e-10	1.31253e-09
YJR133W	YJR133W	YJR133W	CDS	XPT1	2167.13	2346.23	-0.11431	0.0476956	-2.39665	0.0165456	0.0254806
YIL051C	YIL051C	YIL051C	CDS	MMF1	27261.1	22153.9	0.299305	0.0393594	7.6044	2.86228e-14	9.09058e-14
YPL057C	YPL057C	YPL057C	CDS	SUR1	5558.1	5073.52	0.131178	0.0573088	2.28897	0.0220809	0.0335464
YNR010W	YNR010W	YNR010W	CDS	CSE2	447.302	563.876	-0.334095	0.094932	-3.51931	0.000432669	0.000778549
YBL087C	YBL087C	YBL087C	CDS	RPL23A	1570.97	3688.98	-1.23071	0.0583246	-21.101	7.78145e-99	1.23233e-97
YBL092W	YBL092W	YBL092W	CDS	RPL32	1988.44	7127.78	-1.83935	0.0542962	-33.8762	1.4922e-251	8.61282e-250
YNL169C	YNL169C	YNL169C	CDS	PSD1	2859.07	2487.48	0.200783	0.054879	3.65865	0.000253544	0.000464277
YFR034C	YFR034C	YFR034C	CDS	PHO4	2530.25	2167.7	0.224286	0.073327	3.05871	0.00222295	0.0037661
YHR070W	YHR070W	YHR070W	CDS	TRM5	1081.61	1450.58	-0.423325	0.0740606	-5.71592	1.09113e-08	2.67009e-08
YDR460W	YDR460W	YDR460W	CDS	TFB3	1268.13	1374.35	-0.114354	0.0622596	-1.83673	0.0662494	0.0938701
YBL097W	YBL097W	YBL097W	CDS	BRN1	132.808	349.038	-1.39617	0.13827	-10.0975	5.66922e-24	2.49803e-23
YHL047C	YHL047C	YHL047C	CDS	ARN2	4059.94	2432.47	0.740177	0.0568136	13.0282	8.4626e-39	5.35837e-38
YOR360C	YOR360C	YOR360C	CDS	PDE2	1133.64	955.77	0.246643	0.0673177	3.66386	0.000248438	0.000455404
YOR335C	YOR335C	YOR335C	CDS	ALA1	4223.78	5300.54	-0.326806	0.0438399	-7.45453	9.01886e-14	2.81321e-13
YBL100W-C	YBL100W-C	YBL100W-C	CDS	YBL100W-C	60.4563	28.0945	1.09147	0.30214	3.61247	0.0003033	0.000551914
YBL112C	YBL112C	YBL112C	CDS	YBL112C	2.03146	0	3.43357	2.31255	1.48475	0.137609	0.183549
YBR001C	YBR001C	YBR001C	CDS	NTH2	6351.37	3036.24	1.06402	0.0432016	24.6292	6.1536e-134	1.38189e-132
YBR032W	YBR032W	YBR032W	CDS	YBR032W	12.3278	4.98418	1.29404	0.776457	1.6666	0.0955938	0.131942
YGL251C	YGL251C	YGL251C	CDS	HFM1	820.307	568.352	0.527587	0.0875174	6.02837	1.65619e-09	4.2416e-09
YER156C	YER156C	YER156C	CDS	YER156C	1310.97	2048.54	-0.643876	0.0683531	-9.41986	4.5171e-21	1.81203e-20
YBR038W	YBR038W	YBR038W	CDS	CHS2	951.283	2225.17	-1.22757	0.0653446	-18.7861	9.81458e-79	1.22184e-77
YOR095C	YOR095C	YOR095C	CDS	RKI1	1866.81	2754.92	-0.561226	0.054301	-10.3355	4.87046e-25	2.22905e-24
YBR048W	YBR048W	YBR048W	CDS	RPS11B	1655.83	4640.49	-1.48658	0.0495776	-29.985	1.54121e-197	6.18612e-196
YCL014W	YCL014W	YCL014W	CDS	BUD3	1066.28	1646.31	-0.627676	0.0576765	-10.8827	1.39363e-27	6.83028e-27
YOL025W	YOL025W	YOL025W	CDS	LAG2	1710.77	1474.33	0.213295	0.0610787	3.49214	0.000479163	0.000857411
YPL208W	YPL208W	YPL208W	CDS	RKM1	400.904	639.362	-0.674147	0.098191	-6.86566	6.61824e-12	1.91157e-11
YOL147C	YOL147C	YOL147C	CDS	PEX11	2360.1	2182.32	0.113691	0.0521904	2.1784	0.0293765	0.0438387
YNL280C	YNL280C	YNL280C	CDS	ERG24	2191.25	3153.11	-0.524965	0.0647817	-8.10361	5.33531e-16	1.81235e-15
YBR050C	YBR050C	YBR050C	CDS	REG2	24151	11109.9	1.12053	0.0356245	31.454	3.70204e-217	1.70099e-215
YBR066C	YBR066C	YBR066C	CDS	NRG2	320.066	1195.8	-1.90554	0.0839356	-22.7024	4.24563e-114	7.88603e-113
YPR089W	YPR089W	YPR089W	CDS	YPR089W	2551.07	2038.21	0.323915	0.0516656	6.26944	3.62339e-10	9.57825e-10
YBR233W	YBR233W	YBR233W	CDS	PBP2	523.196	724.002	-0.470053	0.0831753	-5.65135	1.59192e-08	3.8564e-08
YPL122C	YPL122C	YPL122C	CDS	TFB2	988.2	916.23	0.107803	0.0655384	1.64489	0.0999924	0.137578
YKL104C	YKL104C	YKL104C	CDS	GFA1	6371.08	5144.34	0.309418	0.0420449	7.35923	1.84981e-13	5.6837e-13
YMR313C	YMR313C	YMR313C	CDS	TGL3	1632.97	1761.13	-0.109054	0.0619243	-1.76109	0.078223	0.109459
YBR070C	YBR070C	YBR070C	CDS	ALG14	323.737	1236.88	-1.93166	0.0868607	-22.2385	1.45653e-109	2.60164e-108
YGL179C	YGL179C	YGL179C	CDS	TOS3	291.934	505.948	-0.793527	0.0997954	-7.95154	1.8421e-15	6.12339e-15
YGR120C	YGR120C	YGR120C	CDS	COG2	531.329	698.647	-0.395737	0.0871625	-4.54022	5.61965e-06	1.16983e-05
YML001W	YML001W	YML001W	CDS	YPT7	3156.5	3181.88	-0.0117594	0.0505491	-0.232633	0.816047	0.859771
YLL028W	YLL028W	YLL028W	CDS	TPO1	2737.46	1761.56	0.636133	0.0565125	11.2565	2.15143e-29	1.10077e-28
YER016W	YER016W	YER016W	CDS	BIM1	1017.38	1334.27	-0.392509	0.0626873	-6.26137	3.81601e-10	1.00798e-09
YDR438W	YDR438W	YDR438W	CDS	THI74	630.722	556.501	0.18274	0.0884856	2.0652	0.0389045	0.0572351
YNL211C	YNL211C	YNL211C	CDS	YNL211C	501.977	515.489	-0.0387903	0.090707	-0.427644	0.66891	0.735758
YLR124W	YLR124W	YLR124W	CDS	YLR124W	31.1798	26.4615	0.24492	0.357021	0.68601	0.492707	0.572556
YML058W-A	YML058W-A	YML058W-A	CDS	HUG1	116.53	192.633	-0.725161	0.162703	-4.45695	8.3135e-06	1.71172e-05
YLR026C	YLR026C	YLR026C	CDS	SED5	947.488	1093.13	-0.206729	0.0759637	-2.72142	0.00650028	0.0104797
YJR065C	YJR065C	YJR065C	CDS	ARP3	10169.1	9011.81	0.17476	0.0361122	4.83937	1.30249e-06	2.83031e-06
YBR071W	YBR071W	YBR071W	CDS	YBR071W	1534.56	3482.99	-1.18418	0.0522332	-22.6709	8.67109e-114	1.60209e-112
YMR095C	YMR095C	YMR095C	CDS	SNO1	821.735	821.517	0.00239832	0.0831942	0.028828	0.977002	0.9899
YER138C	YER138C	YER138C	CDS	YER138C	167.749	147.941	0.186823	0.174679	1.06953	0.284833	0.352583
YDL033C	YDL033C	YDL033C	CDS	SLM3	1162.35	1129.1	0.0438697	0.0666038	0.658666	0.51011	0.589836
YMR255W	YMR255W	YMR255W	CDS	GFD1	3655.17	4758.14	-0.381316	0.0571458	-6.67269	2.5116e-11	7.03328e-11
YHR209W	YHR209W	YHR209W	CDS	CRG1	5011.46	3960.13	0.339105	0.0482497	7.02812	2.09331e-12	6.15306e-12
YGL247W	YGL247W	YGL247W	CDS	BRR6	569.19	508.708	0.160111	0.0949573	1.68614	0.0917697	0.127066
YBR083W	YBR083W	YBR083W	CDS	TEC1	8206.19	3426.92	1.26018	0.0536754	23.4778	6.87796e-122	1.38431e-120
YDR516C	YDR516C	YDR516C	CDS	EMI2	20595.8	10634.3	0.953717	0.0515675	18.4945	2.28545e-76	2.71456e-75
YBR084C-A	YBR084C-A	YBR084C-A	CDS	RPL19A	2921.5	7965.2	-1.44715	0.0432487	-33.4612	1.77048e-245	9.66016e-244
YPL233W	YPL233W	YPL233W	CDS	NSL1	458.266	727.531	-0.666652	0.0874061	-7.62707	2.40145e-14	7.65831e-14
YBR084W	YBR084W	YBR084W	CDS	MIS1	924.529	2416.87	-1.386	0.0632462	-21.9144	1.89423e-106	3.23455e-105
YBR087W	YBR087W	YBR087W	CDS	RFC5	464.727	957.445	-1.04294	0.0812109	-12.8424	9.48836e-38	5.8695e-37
YOR200W	YOR200W	YOR200W	CDS	YOR200W	3.4021	3.21726	0.0547454	1.05646	0.0518195	0.958673	0.976286
YGR251W	YGR251W	YGR251W	CDS	NOP19	561.136	801.705	-0.515549	0.0889183	-5.79801	6.71067e-09	1.65961e-08
YPR047W	YPR047W	YPR047W	CDS	MSF1	1949.61	1492.09	0.38494	0.0692012	5.56262	2.65748e-08	6.37356e-08
YDR246W-A	YDR246W-A	YDR246W-A	CDS	YDR246W-A	71.28	39.7086	0.834946	0.246788	3.38325	0.000716342	0.00126464
YDR044W	YDR044W	YDR044W	CDS	HEM13	1776.04	2422.78	-0.448291	0.0569178	-7.87611	3.37727e-15	1.11049e-14
YDR188W	YDR188W	YDR188W	CDS	CCT6	4839.1	5167.53	-0.0943403	0.0535761	-1.76087	0.0782611	0.10949
YEL016C	YEL016C	YEL016C	CDS	NPP2	653.412	1047.14	-0.677361	0.0733774	-9.2312	2.67624e-20	1.04418e-19
YAL027W	YAL027W	YAL027W	CDS	SAW1	1291.57	1099.46	0.231283	0.0593039	3.89996	9.62073e-05	0.000182118
tL%28UAA%29B2	tL%28UAA%29B2	tL%28UAA%29B2	noncoding_exon	tL%28UAA%29B2	1.80596	3.05985	-0.784834	1.4188	-0.553166	0.58015	0.656157
YBR088C	YBR088C	YBR088C	CDS	POL30	382.933	2026.89	-2.40557	0.0764819	-31.4528	3.84665e-217	1.75588e-215
YBR092C	YBR092C	YBR092C	CDS	PHO3	1350.13	4941.11	-1.87214	0.0548573	-34.1275	2.88919e-255	1.73949e-253
YFL019C	YFL019C	YFL019C	CDS	YFL019C	33.5287	38.4974	-0.189651	0.313201	-0.605523	0.544831	0.622876
YMR139W	YMR139W	YMR139W	CDS	RIM11	6847.81	4863.69	0.493609	0.0370412	13.3259	1.63562e-40	1.07159e-39
YDL080C	YDL080C	YDL080C	CDS	THI3	1209.83	1304.38	-0.108257	0.0581649	-1.86121	0.0627152	0.0891882
YOR172W	YOR172W	YOR172W	CDS	YRM1	1572.49	1429.91	0.138542	0.055107	2.51406	0.0119351	0.0186935
YOR105W	YOR105W	YOR105W	CDS	YOR105W	72.2541	64.439	0.152161	0.235874	0.645094	0.518866	0.598079
YJL138C	YJL138C	YJL138C	CDS	TIF2	4840.45	6426	-0.408943	0.0362166	-11.2916	1.44399e-29	7.4153e-29
YPR143W	YPR143W	YPR143W	CDS	RRP15	2215.01	3733.53	-0.754026	0.0734535	-10.2654	1.00948e-24	4.57212e-24
YBR093C	YBR093C	YBR093C	CDS	PHO5	2748.6	9838.81	-1.83953	0.0512664	-35.8818	5.87269e-282	4.36328e-280
YNL322C	YNL322C	YNL322C	CDS	KRE1	13308.9	12446.3	0.0969181	0.0456426	2.12341	0.0337194	0.0499461
YBR105C	YBR105C	YBR105C	CDS	VID24	3255.62	1562.32	1.06026	0.047339	22.3971	4.19799e-111	7.55638e-110
YBR113W	YBR113W	YBR113W	CDS	YBR113W	3.25287	6.63611	-1.04872	0.931279	-1.12611	0.260121	0.324524
YBL058W	YBL058W	YBL058W	CDS	SHP1	8670.47	6127.17	0.500856	0.0346589	14.451	2.46974e-47	1.86876e-46
YBR121C	YBR121C	YBR121C	CDS	GRS1	4448.89	9116.6	-1.03406	0.0442543	-23.3664	9.38453e-121	1.87798e-119
YNL197C	YNL197C	YNL197C	CDS	WHI3	1931.08	1649.2	0.228371	0.0579175	3.94303	8.04582e-05	0.000153698
YLR439W	YLR439W	YLR439W	CDS	MRPL4	3506.63	4478.8	-0.352899	0.0551619	-6.39752	1.57923e-10	4.24858e-10
YCR020C	YCR020C	YCR020C	CDS	PET18	403.895	439.028	-0.12	0.117411	-1.02205	0.306756	0.377712
YCL051W	YCL051W	YCL051W	CDS	LRE1	2148.59	1518.05	0.501358	0.0503655	9.9544	2.41281e-23	1.04212e-22
YCR097W	YCR097W	YCR097W	CDS	HMRA1	6998.09	6610.54	0.0819291	0.130028	0.630089	0.528636	0.607436
YBL039C-A	YBL039C-A	YBL039C-A	CDS	YBL039C-A	1.42241	1.02794	0.452923	1.59129	0.284626	0.775931	0.827217
YDR235W	YDR235W	YDR235W	CDS	PRP42	940.138	818.833	0.197058	0.0774754	2.5435	0.0109749	0.01724
YGL194C-A	YGL194C-A	YGL194C-A	CDS	YGL194C-A	317.537	236.704	0.416355	0.133463	3.11963	0.00181078	0.0030966
YER038C	YER038C	YER038C	CDS	KRE29	408.198	432.831	-0.082197	0.117846	-0.697495	0.485493	0.56502
YPR125W	YPR125W	YPR125W	CDS	YLH47	921.614	1475.91	-0.679439	0.0656701	-10.3462	4.35272e-25	1.99602e-24
YBR124W	YBR124W	YBR124W	CDS	YBR124W	15.4477	4.74932	1.69288	0.703978	2.40473	0.0161843	0.0249572
YHR049W	YHR049W	YHR049W	CDS	FSH1	2286.69	3013.68	-0.398256	0.0480742	-8.28418	1.18926e-16	4.12812e-16
YBR007C	YBR007C	YBR007C	CDS	DSF2	693.62	734.026	-0.0799556	0.0878406	-0.910236	0.362698	0.437644
YPL001W	YPL001W	YPL001W	CDS	HAT1	209.386	296.023	-0.500378	0.126434	-3.95762	7.57005e-05	0.000145086
YBR126W-A	YBR126W-A	YBR126W-A	CDS	YBR126W-A	6365.45	2545.52	1.32241	0.504996	2.61866	0.00882771	0.0140311
YOR158W	YOR158W	YOR158W	CDS	PET123	3436.01	3468.46	-0.0145207	0.0486202	-0.298655	0.765203	0.818153
YPR178W	YPR178W	YPR178W	CDS	PRP4	1546.48	1287.99	0.264226	0.0713729	3.70205	0.000213865	0.000393995
YER079C-A	YER079C-A	YER079C-A	CDS	YER079C-A	2.05596	3.45639	-0.740998	1.20232	-0.616305	0.537694	0.615817
TLC1	TLC1	TLC1	noncoding_exon	TLC1	4756	3778.37	0.33176	0.0635069	5.22401	1.75093e-07	4.01067e-07
YNL159C	YNL159C	YNL159C	CDS	ASI2	2344.58	1735	0.436788	0.0585103	7.46516	8.31977e-14	2.59863e-13
YAL014C	YAL014C	YAL014C	CDS	SYN8	2322.89	1671.35	0.476305	0.0542344	8.78234	1.60115e-18	5.88547e-18
YCR020W-B	YCR020W-B	YCR020W-B	CDS	HTL1	200.659	268.21	-0.41842	0.133979	-3.12303	0.00178998	0.00306327
YBR126W-B	YBR126W-B	YBR126W-B	CDS	YBR126W-B	267.708	716.78	-1.42103	1.19579	-1.18836
YLR181C	YLR181C	YLR181C	CDS	VTA1	1976.82	1773.97	0.157345	0.052336	3.00645	0.00264319	0.004445
YCR073C	YCR073C	YCR073C	CDS	SSK22	2287.32	1216.82	0.912271	0.0670172	13.6125	3.3753e-42	2.28643e-41
YBR131C-A	YBR131C-A	YBR131C-A	CDS	YBR131C-A	0	0.745127	-1.9524	4.33975	-0.449888	0.652791	0.721604
tD%28GUC%29G1	tD%28GUC%29G1	tD%28GUC%29G1	noncoding_exon	tD%28GUC%29G1	0	0	0	3.48005	0	1	1
YBR132C	YBR132C	YBR132C	CDS	AGP2	12371	5879.2	1.07345	0.0364199	29.4743	6.14416e-191	2.2947e-189
YBR134W	YBR134W	YBR134W	CDS	YBR134W	11.5029	5.34318	1.15596	0.707063	1.63488	0.102075	0.139947
YJL012C	YJL012C	YJL012C	CDS	VTC4	4522.25	5984.99	-0.404377	0.0569207	-7.10421	1.2101e-12	3.58867e-12
YJL065C	YJL065C	YJL065C	CDS	DLS1	1588.26	1615.22	-0.0246366	0.0742021	-0.33202	0.739874	0.796191
YKR020W	YKR020W	YKR020W	CDS	VPS51	899.006	910.2	-0.0190427	0.0784525	-0.24273	0.808215	0.85485
YMR053C	YMR053C	YMR053C	CDS	STB2	1497.37	1186.58	0.335595	0.0610154	5.50017	3.79429e-08	9.04724e-08
YKL066W	YKL066W	YKL066W	CDS	YKL066W	6560.99	7765.16	-0.243309	0.110528	-2.20133	0.0277129	0.0414981
YMR004W	YMR004W	YMR004W	CDS	MVP1	3194.91	2392.16	0.418373	0.0482888	8.66397	4.55602e-18	1.65209e-17
YER083C	YER083C	YER083C	CDS	GET2	4305.87	2920.14	0.560948	0.0565389	9.92146	3.35811e-23	1.44238e-22
YPL176C	YPL176C	YPL176C	CDS	TRE1	4302.65	3566.94	0.271095	0.0501524	5.40542	6.46556e-08	1.52141e-07
YBR158W	YBR158W	YBR158W	CDS	AMN1	6189.59	2697.99	1.19726	0.0424843	28.1813	9.91411e-175	3.14728e-173
YKL091C	YKL091C	YKL091C	CDS	YKL091C	5030.22	3260.01	0.62605	0.0396003	15.8092	2.68749e-56	2.36987e-55
YDL240W	YDL240W	YDL240W	CDS	LRG1	799.476	636.435	0.326731	0.0818848	3.99013	6.60374e-05	0.000127475
YDR401W	YDR401W	YDR401W	CDS	YDR401W	153.93	77.8507	0.98439	0.186365	5.28204	1.27752e-07	2.94948e-07
YFR013W	YFR013W	YFR013W	CDS	IOC3	3254.37	2053.72	0.663667	0.0580387	11.4349	2.79801e-30	1.45613e-29
YHR013C	YHR013C	YHR013C	CDS	ARD1	1184.64	1610.94	-0.443254	0.0639155	-6.935	4.06235e-12	1.18412e-11
YBR160W	YBR160W	YBR160W	CDS	CDC28	1014.17	2366.27	-1.22197	0.065772	-18.5789	4.76255e-77	5.73477e-76
YGL045W	YGL045W	YGL045W	CDS	RIM8	4516.49	2521.29	0.840475	0.0427542	19.6583	4.90766e-86	6.86875e-85
YCL035C	YCL035C	YCL035C	CDS	GRX1	22518.7	18153.7	0.310661	0.0332553	9.34169	9.48058e-21	3.76421e-20
YIL023C	YIL023C	YIL023C	CDS	YKE4	2776.54	1952.52	0.508643	0.0535272	9.50253	2.04861e-21	8.30864e-21
YBR162C	YBR162C	YBR162C	CDS	TOS1	7502.22	23244	-1.63158	0.0350654	-46.5297	0	0
YPR200C	YPR200C	YPR200C	CDS	ARR2	84.7876	95.1234	-0.165521	0.21033	-0.786958	0.431306	0.509686
YIL072W	YIL072W	YIL072W	CDS	HOP1	677.401	465.51	0.540866	0.0875636	6.17683	6.54006e-10	1.70814e-09
YLR327C	YLR327C	YLR327C	CDS	TMA10	78911.2	42332.4	0.898489	0.0463015	19.4052	6.97994e-84	9.4108e-83
YBR229C	YBR229C	YBR229C	CDS	ROT2	2005.53	2440.22	-0.284282	0.0509064	-5.58441	2.34493e-08	5.6453e-08
YMR100W	YMR100W	YMR100W	CDS	MUB1	2364.59	2349.69	0.00761051	0.0630906	0.120628	0.903986	0.930773
YBR181C	YBR181C	YBR181C	CDS	RPS6B	873.705	3298.92	-1.91442	0.0643925	-29.7305	3.10138e-194	1.19669e-192
YOR131C	YOR131C	YOR131C	CDS	YOR131C	1793.98	1826.05	-0.0261482	0.0704915	-0.37094	0.710682	0.773264
YLR455W	YLR455W	YLR455W	CDS	PDP3	1259.54	1126.31	0.161738	0.0669104	2.41723	0.0156392	0.0241861
YNL247W	YNL247W	YNL247W	CDS	YNL247W	2435.77	4004.46	-0.715928	0.0558922	-12.8091	1.45845e-37	8.9901e-37
YOR054C	YOR054C	YOR054C	CDS	VHS3	5521.19	3992.73	0.467605	0.0449622	10.4	2.48044e-25	1.14725e-24
YGL007C-A	YGL007C-A	YGL007C-A	CDS	YGL007C-A	95.7637	51.9154	0.887109	0.218017	4.06899	4.7217e-05	9.2319e-05
YBR183W	YBR183W	YBR183W	CDS	YPC1	4490.99	1539.9	1.54347	0.0534691	28.8665	3.14289e-183	1.10858e-181
YFR028C	YFR028C	YFR028C	CDS	CDC14	920.711	1752.95	-0.929386	0.073125	-12.7096	5.233e-37	3.16975e-36
YOR009W	YOR009W	YOR009W	CDS	TIR4	559.591	530.109	0.0785319	0.0994101	0.789979	0.42954	0.50777
YOR072W	YOR072W	YOR072W	CDS	YOR072W	49.2836	31.7703	0.639091	0.281338	2.27161	0.0231101	0.0350338
YDR292C	YDR292C	YDR292C	CDS	SRP101	1948.28	2667.04	-0.452418	0.0476432	-9.49596	2.18195e-21	8.83405e-21
YOR161C-C	YOR161C-C	YOR161C-C	CDS	YOR161C-C	7.00794	7.80302	-0.136488	0.632178	-0.215901	0.829065	0.869176
YBR189W	YBR189W	YBR189W	CDS	RPS9B	1641.34	7023.44	-2.09757	0.0524463	-39.9947	0	0
YBR190W	YBR190W	YBR190W	CDS	YBR190W	12.1403	40.7088	-1.75028	0.422452	-4.14314	3.42589e-05	6.75697e-05
tD%28GUC%29Q	tD%28GUC%29Q	tD%28GUC%29Q	noncoding_exon	tD%28GUC%29Q	0.913575	1.04577	-0.168639	3.4287	-0.0491846	0.960772	0.977687
YBR191W	YBR191W	YBR191W	CDS	RPL21A	1153.45	5021.09	-2.12257	0.0657405	-32.2871	1.06272e-228	5.15422e-227
YEL063C	YEL063C	YEL063C	CDS	CAN1	3740.3	3859.98	-0.0454358	0.0561532	-0.80914	0.418434	0.4964
YBR191W-A	YBR191W-A	YBR191W-A	CDS	YBR191W-A	47.8373	176.114	-1.88292	0.18135	-10.3828	2.96942e-25	1.37068e-24
tD%28GUC%29N	tD%28GUC%29N	tD%28GUC%29N	noncoding_exon	tD%28GUC%29N	13.4157	24.7425	-0.877579	0.431651	-2.03308	0.0420448	0.0615212
YOR249C	YOR249C	YOR249C	CDS	APC5	1688.65	1220.06	0.467133	0.0582149	8.0243	1.0211e-15	3.43349e-15
YBR209W	YBR209W	YBR209W	CDS	YBR209W	3.35033	7.91674	-1.21077	0.740285	-1.63555	0.101934	0.139781
tD%28GUC%29D	tD%28GUC%29D	tD%28GUC%29D	noncoding_exon	tD%28GUC%29D	0.913575	1.35256	-0.519764	2.29315	-0.22666	0.820688	0.863336
YBR221W-A	YBR221W-A	YBR221W-A	CDS	YBR221W-A	4.75099	2.32087	1.02118	0.986471	1.03518	0.300584	0.370636
YBR223W-A	YBR223W-A	YBR223W-A	CDS	YBR223W-A	0	0.920366	-2.32094	2.25723	-1.02823	0.303844	0.374258
YBR230W-A	YBR230W-A	YBR230W-A	CDS	YBR230W-A	5126.31	1770.28	1.53502	0.0705336	21.763	5.20137e-105	8.7323e-104
YBR238C	YBR238C	YBR238C	CDS	YBR238C	254.195	523.667	-1.03939	0.113789	-9.13436	6.57951e-20	2.53036e-19
YKL218C	YKL218C	YKL218C	CDS	SRY1	3141.78	1890.01	0.733907	0.0465579	15.7633	5.56298e-56	4.89318e-55
YBL107C	YBL107C	YBL107C	CDS	MIX23	1372.22	1554.23	-0.178993	0.0559119	-3.20133	0.00136793	0.00235892
YDR391C	YDR391C	YDR391C	CDS	YDR391C	3781.4	2873.63	0.395434	0.0477597	8.27965	1.23535e-16	4.28384e-16
YLL063C	YLL063C	YLL063C	CDS	AYT1	285.813	293.122	-0.0360847	0.108148	-0.333659	0.738637	0.795473
YBR240C	YBR240C	YBR240C	CDS	THI2	171.036	348.034	-1.01702	0.137838	-7.37836	1.60255e-13	4.94575e-13
YOR276W	YOR276W	YOR276W	CDS	CAF20	1197.57	1926.62	-0.686771	0.0632594	-10.8564	1.85879e-27	9.08454e-27
YBR241C	YBR241C	YBR241C	CDS	YBR241C	11269.6	5621.63	1.00395	0.0654748	15.3333	4.57827e-53	3.83849e-52
YOR089C	YOR089C	YOR089C	CDS	VPS21	8509.8	5749.84	0.565203	0.0575923	9.81387	9.81316e-23	4.14861e-22
YGR258C	YGR258C	YGR258C	CDS	RAD2	3764.09	2908.96	0.371675	0.0455486	8.15997	3.35102e-16	1.14275e-15
YBR243C	YBR243C	YBR243C	CDS	ALG7	413.623	1056.45	-1.35063	0.0874131	-15.4511	7.41947e-54	6.28092e-53
YMR180C	YMR180C	YMR180C	CDS	CTL1	3669.18	2263.56	0.697579	0.0510388	13.6676	1.58491e-42	1.08201e-41
YGL163C	YGL163C	YGL163C	CDS	RAD54	3456.34	2472.59	0.483158	0.0542137	8.91211	5.00682e-19	1.86993e-18
YDR417C	YDR417C	YDR417C	CDS	YDR417C	24.7486	12.3391	0.975295	0.531079	1.83644	0.0662925	0.0938975
YOL131W	YOL131W	YOL131W	CDS	YOL131W	63.5338	43.045	0.579996	0.248687	2.33224	0.0196882	0.0300876
YBR249C	YBR249C	YBR249C	CDS	ARO4	1702.45	6743.21	-1.9867	0.045436	-43.7252	0	0
YDL056W	YDL056W	YDL056W	CDS	MBP1	2245.91	1815.62	0.306178	0.0552936	5.53732	3.07131e-08	7.34842e-08
YBL021C	YBL021C	YBL021C	CDS	HAP3	1201.5	1115.73	0.105125	0.060757	1.73025	0.0835848	0.116449
YHR215W	YHR215W	YHR215W	CDS	PHO12	213.578	157.937	0.432567	0.142764	3.02994	0.00244604	0.00412636
YBR277C	YBR277C	YBR277C	CDS	YBR277C	1.52263	3.70908	-1.1986	1.21241	-0.98861	0.322854	0.394889
YOR209C	YOR209C	YOR209C	CDS	NPT1	2638.07	4485.8	-0.765512	0.0474482	-16.1336	1.48094e-58	1.35556e-57
YLR007W	YLR007W	YLR007W	CDS	NSE1	1111.38	1228.52	-0.145744	0.0733555	-1.98682	0.046942	0.068187
YNL261W	YNL261W	YNL261W	CDS	ORC5	784.836	875.851	-0.160424	0.0728268	-2.20281	0.0276079	0.0413497
YBR296C	YBR296C	YBR296C	CDS	PHO89	3368.58	1639.48	1.03857	0.0554999	18.7129	3.88339e-78	4.78335e-77
YDR065W	YDR065W	YDR065W	CDS	RRG1	568.62	471.704	0.268234	0.0924717	2.90071	0.00372314	0.00616171
YOR126C	YOR126C	YOR126C	CDS	IAH1	710.376	829.711	-0.225128	0.0762582	-2.95218	0.0031554	0.00526076
YJL046W	YJL046W	YJL046W	CDS	AIM22	1043.14	1017.74	0.0345412	0.0744787	0.463773	0.642811	0.712375
YKR078W	YKR078W	YKR078W	CDS	YKR078W	1576.23	1124.69	0.486892	0.0582006	8.36576	5.9727e-17	2.08775e-16
YOR191W	YOR191W	YOR191W	CDS	ULS1	4272.52	3684.83	0.213952	0.0421497	5.07601	3.85447e-07	8.64193e-07
YBR296C-A	YBR296C-A	YBR296C-A	CDS	YBR296C-A	12.6268	4.06997	1.6345	0.679128	2.40676	0.0160947	0.02483
YDR272W	YDR272W	YDR272W	CDS	GLO2	10214.2	6404.79	0.673001	0.0394829	17.0454	3.78205e-65	3.85604e-64
YBR298C	YBR298C	YBR298C	CDS	MAL31	5072	2426.31	1.06436	0.0512999	20.7478	1.28273e-95	1.97761e-94
YML020W	YML020W	YML020W	CDS	YML020W	1416.98	1447.94	-0.0334144	0.0660622	-0.505802	0.612995	0.685434
YBR298C-A	YBR298C-A	YBR298C-A	CDS	YBR298C-A	0	1.00397	-2.40648	2.0668	-1.16435	0.244282	0.307123
YCL018W	YCL018W	YCL018W	CDS	LEU2	1219.35	2458.38	-1.01142	0.0525821	-19.235	1.88538e-82	2.46582e-81
YEL062W	YEL062W	YEL062W	CDS	NPR2	894.369	753.559	0.246964	0.0852088	2.89835	0.00375138	0.0062055
YPR064W	YPR064W	YPR064W	CDS	YPR064W	41.263	29.669	0.479015	0.329433	1.45406	0.14593	0.193465
YPR031W	YPR031W	YPR031W	CDS	NTO1	962.759	898.036	0.097463	0.0766954	1.27078	0.203807	0.260932
YLR038C	YLR038C	YLR038C	CDS	COX12	14545.2	17097.4	-0.233652	0.0351415	-6.6489	2.95295e-11	8.24605e-11
YNL096C	YNL096C	YNL096C	CDS	RPS7B	1438.48	2731.53	-0.925036	0.052436	-17.6412	1.18848e-69	1.30509e-68
YDR038C	YDR038C	YDR038C	CDS	ENA5	264.988	225.202	0.232206	0.122456	1.89625	0.0579274	0.0828505
YPR160W-A	YPR160W-A	YPR160W-A	CDS	YPR160W-A	1.04161	1.02794	0.0174841	1.66915	0.0104749	0.991642	1
YDL187C	YDL187C	YDL187C	CDS	YDL187C	42.9604	38.0432	0.173955	0.308589	0.563712	0.57295	0.648959
YBR024W	YBR024W	YBR024W	CDS	SCO2	3769.21	3031.77	0.313778	0.0436374	7.19057	6.45213e-13	1.93897e-12
YER171W	YER171W	YER171W	CDS	RAD3	1076.45	1164.19	-0.11359	0.0702139	-1.61777	0.105713	0.144509
YDL047W	YDL047W	YDL047W	CDS	SIT4	4013.16	3226.26	0.315511	0.0527665	5.97938	2.23984e-09	5.7029e-09
YML046W	YML046W	YML046W	CDS	PRP39	662.893	678.472	-0.0363054	0.09553	-0.380041	0.703915	0.767188
YGL124C	YGL124C	YGL124C	CDS	MON1	1986.63	1812.76	0.132196	0.0536613	2.46353	0.0137576	0.0213947
YDR107C	YDR107C	YDR107C	CDS	TMN2	681.929	1073.89	-0.656446	0.0749542	-8.75795	1.98832e-18	7.2933e-18
YMR276W	YMR276W	YMR276W	CDS	DSK2	15019.6	11237.6	0.418909	0.0593328	7.06032	1.66118e-12	4.89729e-12
YCL020W	YCL020W	YCL020W	CDS	YCL020W	265.482	128.479	1.04775	0.432588	2.42204	0.0154336	0.0238997
YDL160C-A	YDL160C-A	YDL160C-A	CDS	MHF2	346.036	564.582	-0.706304	0.108186	-6.52859	6.63917e-11	1.81907e-10
YLR165C	YLR165C	YLR165C	CDS	PUS5	1393.51	1020.17	0.447701	0.0633838	7.06333	1.62554e-12	4.79627e-12
YCR069W	YCR069W	YCR069W	CDS	CPR4	4439.24	3798.75	0.224879	0.0399054	5.63531	1.74742e-08	4.22723e-08
YKL223W	YKL223W	YKL223W	CDS	YKL223W	0	0
YGR146C-A	YGR146C-A	YGR146C-A	CDS	YGR146C-A	12.3958	19.1645	-0.625835	0.445462	-1.40491	0.160048	0.20995
YKL027W	YKL027W	YKL027W	CDS	TCD2	568.587	827.219	-0.537898	0.0908054	-5.92363	3.14905e-09	7.93682e-09
YJL173C	YJL173C	YJL173C	CDS	RFA3	907.954	1660.07	-0.870039	0.0696109	-12.4986	7.59809e-36	4.49704e-35
YDR152W	YDR152W	YDR152W	CDS	GIR2	2980.27	3206.51	-0.105403	0.047686	-2.21035	0.0270807	0.0406037
YKL127W	YKL127W	YKL127W	CDS	PGM1	499.313	722.264	-0.528463	0.104993	-5.0333	4.82103e-07	1.07572e-06
YDR309C	YDR309C	YDR309C	CDS	GIC2	1602.64	3135.59	-0.968976	0.0576375	-16.8116	2.00766e-63	2.00022e-62
YLR386W	YLR386W	YLR386W	CDS	VAC14	2117.81	1852.16	0.192003	0.0561571	3.41903	0.000628457	0.00111202
YLR371W	YLR371W	YLR371W	CDS	ROM2	4415.66	3298.36	0.421009	0.0398875	10.5549	4.82118e-26	2.27354e-25
YDL169C	YDL169C	YDL169C	CDS	UGX2	6020.45	3543.7	0.763833	0.0486332	15.706	1.37573e-55	1.20402e-54
snR32	snR32	snR32	noncoding_exon	SNR32	79.2926	70.4904	0.157879	0.285746	0.552515	0.580595	0.656448
YLR092W	YLR092W	YLR092W	CDS	SUL2	647.424	538.62	0.268429	0.0909227	2.95228	0.00315439	0.00526033
YLR423C	YLR423C	YLR423C	CDS	ATG17	1404.36	1151.67	0.28517	0.0671266	4.24823	2.15462e-05	4.29929e-05
YMR072W	YMR072W	YMR072W	CDS	ABF2	6918.43	10587.5	-0.614215	0.0396479	-15.4917	3.94531e-54	3.36847e-53
YJR033C	YJR033C	YJR033C	CDS	RAV1	3103.49	2009.39	0.626872	0.0576098	10.8813	1.41469e-27	6.92863e-27
YKR056W	YKR056W	YKR056W	CDS	TRM2	1220.35	1705.07	-0.480145	0.061073	-7.86183	3.78574e-15	1.24188e-14
YGL011C	YGL011C	YGL011C	CDS	SCL1	9463.3	7540.74	0.327494	0.0405404	8.07821	6.57236e-16	2.2239e-15
YIR036C	YIR036C	YIR036C	CDS	IRC24	7578.08	5195.44	0.545036	0.0587751	9.27325	1.80567e-20	7.11268e-20
YMR123W	YMR123W	YMR123W	CDS	PKR1	642.015	1159.13	-0.853163	0.066341	-12.8603	7.53148e-38	4.6797e-37
YCL021W-A	YCL021W-A	YCL021W-A	CDS	YCL021W-A	402.54	180.759	1.15933	0.122156	9.49053	2.29864e-21	9.29034e-21
YGR073C	YGR073C	YGR073C	CDS	YGR073C	126.197	74.1754	0.768693	0.193011	3.98263	6.81554e-05	0.000131273
YGR209C	YGR209C	YGR209C	CDS	TRX2	19543.3	13152.7	0.571262	0.044971	12.7029	5.69835e-37	3.44565e-36
YCL023C	YCL023C	YCL023C	CDS	YCL023C	9.782	4.70563	1.11118	0.717104	1.54954	0.121251	0.163604
YNL050C	YNL050C	YNL050C	CDS	YNL050C	1106.98	1400.57	-0.340109	0.0695209	-4.89219	9.97188e-07	2.18113e-06
YCL026C-A	YCL026C-A	YCL026C-A	CDS	FRM2	13.87	32.6512	-1.23181	0.409305	-3.00952	0.00261657	0.00440234
YLR240W	YLR240W	YLR240W	CDS	VPS34	2625.31	1616.59	0.699538	0.049319	14.1839	1.15206e-45	8.38124e-45
YOR039W	YOR039W	YOR039W	CDS	CKB2	1607.58	1955.3	-0.283291	0.0517599	-5.47318	4.42022e-08	1.04967e-07
YDL234C	YDL234C	YDL234C	CDS	GYP7	8234.77	5683.61	0.53485	0.0397753	13.4468	3.21514e-41	2.1467e-40
YGL080W	YGL080W	YGL080W	CDS	MPC1	1578.32	1788.7	-0.181992	0.0617128	-2.94901	0.00318795	0.0053125
YNL136W	YNL136W	YNL136W	CDS	EAF7	8673.72	5321.06	0.704907	0.099937	7.05352	1.74449e-12	5.14072e-12
YKL049C	YKL049C	YKL049C	CDS	CSE4	989.642	1645.89	-0.736238	0.0738414	-9.97053	2.05127e-23	8.90926e-23
YBL002W	YBL002W	YBL002W	CDS	HTB2	1964.89	3753.49	-0.934135	0.0526399	-17.7458	1.85879e-70	2.05734e-69
YNR038W	YNR038W	YNR038W	CDS	DBP6	677.972	1232.24	-0.860985	0.0800144	-10.7604	5.29521e-27	2.55222e-26
YBR037C	YBR037C	YBR037C	CDS	SCO1	3447.67	2908.11	0.24609	0.0455729	5.39992	6.66706e-08	1.56619e-07
YGL140C	YGL140C	YGL140C	CDS	YGL140C	3757.74	2639.97	0.510159	0.0477394	10.6863	1.17931e-26	5.64906e-26
YCL029C	YCL029C	YCL029C	CDS	BIK1	972.137	1059.77	-0.121813	0.0681564	-1.78726	0.0738955	0.103819
YFL038C	YFL038C	YFL038C	CDS	YPT1	12256	12133.4	0.0145733	0.0376703	0.386864	0.698857	0.762746
YJR131W	YJR131W	YJR131W	CDS	MNS1	2385.39	1946.98	0.292848	0.0540618	5.41691	6.06395e-08	1.43077e-07
YNR012W	YNR012W	YNR012W	CDS	URK1	649.973	1151.53	-0.827417	0.0778327	-10.6307	2.14454e-26	1.02165e-25
YBR028C	YBR028C	YBR028C	CDS	YPK3	729.23	1174.7	-0.688865	0.0740075	-9.30805	1.30203e-20	5.15497e-20
YCL027W	YCL027W	YCL027W	CDS	FUS1	1890.64	438.534	2.10949	0.0703546	29.9837	1.59951e-197	6.3834e-196
YCL036W	YCL036W	YCL036W	CDS	GFD2	530.025	1452.64	-1.4547	0.0740311	-19.6499	5.79524e-86	8.07864e-85
YDR367W	YDR367W	YDR367W	CDS	KEI1	1389.84	1390.68	-0.00190687	0.064344	-0.0296356	0.976358	0.989597
YHR072W	YHR072W	YHR072W	CDS	ERG7	3107.82	2351.21	0.402356	0.0473739	8.49321	2.01008e-17	7.14787e-17
YPL059W	YPL059W	YPL059W	CDS	GRX5	3365.91	3436.5	-0.0297715	0.0418762	-0.710942	0.47712	0.556667
YGL253W	YGL253W	YGL253W	CDS	HXK2	7418.55	7805.55	-0.072975	0.0415874	-1.75474	0.0793043	0.110839
YCL041C	YCL041C	YCL041C	CDS	YCL041C	813.156	188.1	2.11278	0.334625	6.31386	2.72161e-10	7.24379e-10
YHL032C	YHL032C	YHL032C	CDS	GUT1	28955.3	33436.3	-0.207419	0.0475221	-4.36468	1.27311e-05	2.58171e-05
YJL010C	YJL010C	YJL010C	CDS	NOP9	455.664	840.109	-0.885574	0.0836549	-10.586	3.45914e-26	1.6401e-25
YCL048W-A	YCL048W-A	YCL048W-A	CDS	YCL048W-A	1292.18	415.897	1.63509	0.0858861	19.0379	8.27256e-81	1.06205e-79
YOR337W	YOR337W	YOR337W	CDS	TEA1	941.748	1131.52	-0.264425	0.0673809	-3.92433	8.69731e-05	0.000165555
YMR010W	YMR010W	YMR010W	CDS	YMR010W	610.171	915.887	-0.585059	0.0759154	-7.70673	1.29086e-14	4.15647e-14
YOR097C	YOR097C	YOR097C	CDS	YOR097C	1770.38	1503.68	0.23448	0.0593205	3.95276	7.72554e-05	0.000147903
YHR118C	YHR118C	YHR118C	CDS	ORC6	1165.62	1209.69	-0.054131	0.0651973	-0.830264	0.406389	0.484173
YGR024C	YGR024C	YGR024C	CDS	THG1	1734.86	1679.11	0.0465219	0.0689656	0.674567	0.499951	0.579913
YOL023W	YOL023W	YOL023W	CDS	IFM1	2082.83	2106.18	-0.0157827	0.0498798	-0.316415	0.751688	0.806419
YPL253C	YPL253C	YPL253C	CDS	VIK1	218.307	349.382	-0.684238	0.129176	-5.29696	1.17745e-07	2.72747e-07
YOR259C	YOR259C	YOR259C	CDS	RPT4	10523	7435.08	0.501182	0.0319434	15.6897	1.77899e-55	1.55305e-54
YER154W	YER154W	YER154W	CDS	OXA1	4064.35	4214.06	-0.051566	0.0426284	-1.20966	0.226408	0.286819
YBR300C	YBR300C	YBR300C	CDS	YBR300C	1.47417	1.57574	-0.178905	1.52495	-0.117319	0.906608	0.93306
YEL036C	YEL036C	YEL036C	CDS	ANP1	1178.13	1344.53	-0.191111	0.0638146	-2.99479	0.00274633	0.00460956
YBR260C	YBR260C	YBR260C	CDS	RGD1	1519.4	1326.03	0.198564	0.0598823	3.31591	0.000913445	0.00159887
YCL054W	YCL054W	YCL054W	CDS	SPB1	778.617	2302.77	-1.5648	0.0695762	-22.4905	5.14403e-112	9.38012e-111
YAL042W	YAL042W	YAL042W	CDS	ERV46	5281.48	6107.74	-0.209482	0.0478007	-4.38241	1.17373e-05	2.3892e-05
YAL035W	YAL035W	YAL035W	CDS	FUN12	17806.5	18302.5	-0.0395232	0.0906224	-0.43613	0.662742	0.730292
YBR235W	YBR235W	YBR235W	CDS	VHC1	2292.84	2197.48	0.0615137	0.0575145	1.06953	0.284829	0.352583
YDR001C	YDR001C	YDR001C	CDS	NTH1	24661.7	12756.3	0.951021	0.0323148	29.4299	2.27565e-190	8.40906e-189
YCL054W-A	YCL054W-A	YCL054W-A	CDS	RDT1	26.366	96.6267	-1.8712	0.273076	-6.8523	7.2674e-12	2.09647e-11
YOL141W	YOL141W	YOL141W	CDS	PPM2	203.303	314.299	-0.628749	0.129408	-4.85865	1.18186e-06	2.57378e-06
YCL059C	YCL059C	YCL059C	CDS	KRR1	855.281	2471.5	-1.53083	0.061478	-24.9005	7.34729e-137	1.71045e-135
YBR195C	YBR195C	YBR195C	CDS	MSI1	254.938	324.015	-0.341717	0.117328	-2.91249	0.00358563	0.00594257
YIL039W	YIL039W	YIL039W	CDS	TED1	2383.67	2575.18	-0.112012	0.0497948	-2.24947	0.0244826	0.0369861
YGR122W	YGR122W	YGR122W	CDS	YGR122W	1297.06	986.218	0.394551	0.0674794	5.84699	5.00545e-09	1.24939e-08
YPL092W	YPL092W	YPL092W	CDS	SSU1	5438.34	6553.26	-0.268653	0.0395951	-6.78499	1.16091e-11	3.3093e-11
YCL064C	YCL064C	YCL064C	CDS	CHA1	86443.9	36166.5	1.25717	0.0305016	41.2164	0	0
YCL068C	YCL068C	YCL068C	CDS	YCL068C	7.46832	1.49025	2.39411	1.1011	2.1743	0.0296829	0.0442632
YMR315W	YMR315W	YMR315W	CDS	YMR315W	4375.91	5436.9	-0.312406	0.0474826	-6.57937	4.72448e-11	1.30673e-10
YPL029W	YPL029W	YPL029W	CDS	SUV3	614.426	682.737	-0.152956	0.0899588	-1.70029	0.0890756	0.123531
YDR384C	YDR384C	YDR384C	CDS	ATO3	1458.1	2551.25	-0.80589	0.0711384	-11.3285	9.48326e-30	4.89513e-29
YML007W	YML007W	YML007W	CDS	YAP1	7369.57	7006.91	0.0722363	0.0405234	1.78258	0.074654	0.104716
YER063W	YER063W	YER063W	CDS	THO1	2909.54	3340.65	-0.198638	0.0450829	-4.40606	1.05268e-05	2.15221e-05
YDR481C	YDR481C	YDR481C	CDS	PHO8	9944.93	8934.18	0.155075	0.0382523	4.054	5.03495e-05	9.82786e-05
YER014W	YER014W	YER014W	CDS	HEM14	2230.22	2222.09	0.00583741	0.0537865	0.108529	0.913576	0.93871
YCL069W	YCL069W	YCL069W	CDS	VBA3	0.356291	1.65935	-2.16689	2.27775	-0.951325	0.341439	0.414859
YNL213C	YNL213C	YNL213C	CDS	RRG9	2290.53	1944.79	0.234716	0.057976	4.04851	5.1545e-05	0.000100556
YKL006C-A	YKL006C-A	YKL006C-A	CDS	SFT1	1021.45	1519.21	-0.573844	0.0738165	-7.77393	7.60885e-15	2.46934e-14
YCL073C	YCL073C	YCL073C	CDS	GEX1	0	3.30512	-4.08991	1.74077	-2.34948	0.0187996	0.0287867
YBR058C	YBR058C	YBR058C	CDS	UBP14	2615.48	2790.3	-0.0940228	0.0502802	-1.86998	0.0614872	0.0875844
YLR024C	YLR024C	YLR024C	CDS	UBR2	1637.37	1381.69	0.242813	0.059636	4.07159	4.66931e-05	9.13203e-05
YLR071C	YLR071C	YLR071C	CDS	RGR1	2618.36	2549	0.0386208	0.0427511	0.903387	0.36632	0.441328
YHR092C	YHR092C	YHR092C	CDS	HXT4	3317.26	1770.59	0.906842	0.0614869	14.7486	3.14337e-49	2.44741e-48
YDL199C	YDL199C	YDL199C	CDS	YDL199C	3472.35	1886.01	0.880649	0.0530507	16.6001	6.95498e-62	6.74633e-61
YDR434W	YDR434W	YDR434W	CDS	GPI17	2413.81	2300.52	0.070026	0.0460984	1.51906	0.128748	0.17277
YER181C	YER181C	YER181C	CDS	YER181C	27.0585	31.3198	-0.235279	0.435475	-0.540281	0.589003	0.664126
YNL228W	YNL228W	YNL228W	CDS	YNL228W	114.133	58.2977	0.959749	0.209244	4.58676	4.50185e-06	9.43322e-06
YCL076W	YCL076W	YCL076W	CDS	YCL076W	4.67251	1.04577	2.16246	1.36993	1.57851	0.114448	0.155385
YDL064W	YDL064W	YDL064W	CDS	UBC9	1287.48	1467.3	-0.187698	0.0659017	-2.84815	0.00439749	0.00722126
YDL031W	YDL031W	YDL031W	CDS	DBP10	1973.88	3600.33	-0.866274	0.0617919	-14.0192	1.18919e-44	8.43176e-44
YMR257C	YMR257C	YMR257C	CDS	PET111	1170.26	1129.24	0.050097	0.0632061	0.792598	0.428012	0.506221
YBL108W	YBL108W	YBL108W	CDS	YBL108W	0.660816	0.306789	0.864124	2.91308	0.296636	0.766745	0.819425
YDR046C	YDR046C	YDR046C	CDS	BAP3	4663.05	5438.3	-0.221715	0.0461344	-4.80586	1.54089e-06	3.33382e-06
Q0158	Q0158	Q0158	noncoding_exon	21S_RRNA	29386.4	57035.3	-0.956751	0.103052	-9.28413	1.63033e-20	6.44018e-20
YOR253W	YOR253W	YOR253W	CDS	NAT5	829.158	857.444	-0.0475066	0.0707216	-0.671742	0.501748	0.581708
YOR202W	YOR202W	YOR202W	CDS	HIS3	2309.81	2841.89	-0.297969	0.0708441	-4.20598	2.59951e-05	5.16942e-05
YCR005C	YCR005C	YCR005C	CDS	CIT2	86069.8	37525.5	1.19762	0.0316344	37.8581	0	0
YGL245W	YGL245W	YGL245W	CDS	GUS1	6310	10401.8	-0.720372	0.0415554	-17.3352	2.54988e-67	2.69416e-66
YGR006W	YGR006W	YGR006W	CDS	PRP18	560.903	439.148	0.355859	0.0992366	3.58597	0.00033583	0.000609362
YGR079W	YGR079W	YGR079W	CDS	YGR079W	516.865	871.311	-0.755279	0.106009	-7.12468	1.04326e-12	3.10578e-12
YDL119C	YDL119C	YDL119C	CDS	YDL119C	799.316	697.775	0.194606	0.08443	2.30494	0.0211697	0.0322534
YKL151C	YKL151C	YKL151C	CDS	YKL151C	12116.7	8636.98	0.48803	0.0368891	13.2297	5.91473e-40	3.83908e-39
YGL198W	YGL198W	YGL198W	CDS	YIP4	4766.25	3111.11	0.616581	0.0630989	9.77166	1.4899e-22	6.26081e-22
YDL086W	YDL086W	YDL086W	CDS	YDL086W	7076.99	5016.86	0.497008	0.0486186	10.2226	1.57066e-24	7.03173e-24
YBL091C-A	YBL091C-A	YBL091C-A	CDS	SCS22	655.677	466.474	0.4958	0.103336	4.79795	1.60301e-06	3.46499e-06
YLR361C-A	YLR361C-A	YLR361C-A	CDS	YLR361C-A	2258.63	1805.5	0.321926	0.0633777	5.07948	3.78466e-07	8.49086e-07
YBR141W-A	YBR141W-A	YBR141W-A	CDS	YBR141W-A	26.372	22.1346	0.248441	0.378905	0.655681	0.512029	0.591663
YCR006C	YCR006C	YCR006C	CDS	YCR006C	494.178	159.715	1.62873	0.131643	12.3723	3.68979e-35	2.13678e-34
YHR038W	YHR038W	YHR038W	CDS	RRF1	942.875	1283.72	-0.447029	0.0675839	-6.61443	3.72996e-11	1.03744e-10
YML069W	YML069W	YML069W	CDS	POB3	2651.96	3633.37	-0.453618	0.0450906	-10.0602	8.28707e-24	3.64464e-23
YKR019C	YKR019C	YKR019C	CDS	IRS4	1449.69	836.142	0.793648	0.0639179	12.4167	2.12162e-35	1.23995e-34
tI%28AAU%29I1	tI%28AAU%29I1	tI%28AAU%29I1	noncoding_exon	tI%28AAU%29I1	0	0
YJR073C	YJR073C	YJR073C	CDS	OPI3	34784	18822.4	0.886183	0.0508982	17.4109	6.82037e-68	7.2612e-67
YGR279C	YGR279C	YGR279C	CDS	SCW4	14390.3	19047	-0.404243	0.0405284	-9.97431	1.97462e-23	8.58167e-23
YBL056W	YBL056W	YBL056W	CDS	PTC3	6060.89	5713.01	0.0853191	0.0492695	1.73168	0.0833304	0.116117
YCR022C	YCR022C	YCR022C	CDS	YCR022C	30.4562	33.5964	-0.149405	0.375168	-0.398235	0.690457	0.75606
YLL015W	YLL015W	YLL015W	CDS	BPT1	6624.62	4731.6	0.485078	0.0370137	13.1054	3.06786e-39	1.9567e-38
YCR010C	YCR010C	YCR010C	CDS	ADY2	25681.7	6938.09	1.88817	0.0444499	42.4787	0	0
YCR013C	YCR013C	YCR013C	CDS	YCR013C	20.9112	69.7335	-1.7454	0.368731	-4.73352	2.20656e-06	4.71994e-06
YDR173C	YDR173C	YDR173C	CDS	ARG82	1587.69	1127.18	0.492197	0.0687474	7.15951	8.09661e-13	2.4217e-12
YBR208C	YBR208C	YBR208C	CDS	DUR1%2C2	3887.89	2375.65	0.710869	0.052993	13.4144	4.97864e-41	3.30521e-40
YCL057W	YCL057W	YCL057W	CDS	PRD1	6670.53	5719.04	0.222116	0.037108	5.98568	2.15492e-09	5.49068e-09
YCR016W	YCR016W	YCR016W	CDS	YCR016W	548.882	1271.89	-1.21086	0.0857683	-14.1178	2.94944e-45	2.1127e-44
YBR072W	YBR072W	YBR072W	CDS	HSP26	182184	202011	-0.149033	0.0329289	-4.5259	6.01381e-06	1.24964e-05
YBR005W	YBR005W	YBR005W	CDS	RCR1	2322.08	1473.35	0.657476	0.0611927	10.7444	6.29991e-27	3.02812e-26
YPR123C	YPR123C	YPR123C	CDS	YPR123C	18.2046	14.5505	0.308943	0.51634	0.598332	0.549619	0.627622
RUF5-1	RUF5-1	RUF5-1	noncoding_exon	RUF5-1	14.017	11.6437	0.258784	0.48156	0.537386	0.591001	0.666032
RUF5-2	RUF5-2	RUF5-2	noncoding_exon	RUF5-2	16.5595	15.3472	0.10876	0.427713	0.254282	0.799278	0.847837
YDL173W	YDL173W	YDL173W	CDS	PAR32	8083.76	8478.69	-0.0692061	0.0433784	-1.59541	0.110622	0.15063
YJR047C	YJR047C	YJR047C	CDS	ANB1	167.179	218.993	-0.38215	0.148241	-2.5779	0.00994027	0.0156959
YCR021C	YCR021C	YCR021C	CDS	HSP30	100021	40942.3	1.28866	0.0450248	28.6212	3.65951e-180	1.23469e-178
YKL145W-A	YKL145W-A	YKL145W-A	CDS	YKL145W-A	1.04161	1.02794	0.0174841	1.66915	0.0104749	0.991642	1
YAL016W	YAL016W	YAL016W	CDS	TPD3	9072.01	7004.46	0.373398	0.0387191	9.64376	5.22367e-22	2.14727e-21
YBL068W-A	YBL068W-A	YBL068W-A	CDS	YBL068W-A	3.78565	3.08382	0.300544	0.949327	0.316587	0.751557	0.806403
YCR031C	YCR031C	YCR031C	CDS	RPS14A	4798.95	10360.4	-1.10997	0.057594	-19.2724	9.16345e-83	1.21668e-81
YHR011W	YHR011W	YHR011W	CDS	DIA4	956.154	951.883	0.00759183	0.0759457	0.099964	0.920373	0.944721
YPL152W	YPL152W	YPL152W	CDS	RRD2	1711.15	1370.62	0.318749	0.0713964	4.46449	8.02583e-06	1.65591e-05
YCR034W	YCR034W	YCR034W	CDS	ELO2	401.162	1170.86	-1.54839	0.0757318	-20.4456	6.56975e-93	9.86734e-92
YCR041W	YCR041W	YCR041W	CDS	YCR041W	0.913575	3.45639	-1.809	1.39982	-1.29231	0.196249	0.252366
tD%28GUC%29I1	tD%28GUC%29I1	tD%28GUC%29I1	noncoding_exon	tD%28GUC%29I1	4.9798	3.01805	0.701464	1.06705	0.657387	0.510932	0.590493
YNL077W	YNL077W	YNL077W	CDS	APJ1	2771.6	1720.77	0.685873	0.0502057	13.6613	1.72958e-42	1.17963e-41
YBR109C	YBR109C	YBR109C	CDS	CMD1	6551.42	7180.68	-0.131801	0.0363384	-3.62704	0.000286684	0.000522905
tF%28GAA%29M	tF%28GAA%29M	tF%28GAA%29M	noncoding_exon	tF%28GAA%29M	0	0
YDR346C	YDR346C	YDR346C	CDS	SVF1	3687.7	4194.91	-0.185745	0.0429495	-4.32473	1.52719e-05	3.07462e-05
YAR002C-A	YAR002C-A	YAR002C-A	CDS	ERP1	2878.11	3762.31	-0.385709	0.0491637	-7.84541	4.31538e-15	1.41363e-14
YOL077W-A	YOL077W-A	YOL077W-A	CDS	ATP19	9998.52	10164.6	-0.0241402	0.0621573	-0.388373	0.69774	0.761885
YGR213C	YGR213C	YGR213C	CDS	RTA1	142.563	178.504	-0.322052	0.150893	-2.1343	0.0328179	0.0486832
YBR236C	YBR236C	YBR236C	CDS	ABD1	2255.73	1999.19	0.174785	0.0543018	3.21877	0.00128742	0.00222614
tF%28GAA%29B	tF%28GAA%29B	tF%28GAA%29B	noncoding_exon	tF%28GAA%29B	0	0
YCR045C	YCR045C	YCR045C	CDS	RRT12	425.681	136.235	1.6488	0.134698	12.2407	1.88456e-34	1.07972e-33
YCR050C	YCR050C	YCR050C	CDS	YCR050C	3.17384	6.51624	-1.05327	0.866372	-1.21572	0.224092	0.284246
YCR057C	YCR057C	YCR057C	CDS	PWP2	877.419	1945.63	-1.14952	0.0575984	-19.9574	1.29247e-88	1.85352e-87
YCR063W	YCR063W	YCR063W	CDS	BUD31	73.3164	190.76	-1.37244	0.189662	-7.23622	4.61374e-13	1.3931e-12
YCR072C	YCR072C	YCR072C	CDS	RSA4	189.994	604.071	-1.67366	0.111286	-15.0393	4.0599e-51	3.28555e-50
YJL225C	YJL225C	YJL225C	CDS	YJL225C	44.2826	33.9713	0.38231	0.334096	1.14431	0.252496	0.31614
YKL064W	YKL064W	YKL064W	CDS	MNR2	8912.76	5620.2	0.665032	0.0364464	18.2468	2.19207e-74	2.52631e-73
YLR265C	YLR265C	YLR265C	CDS	NEJ1	493.976	814.687	-0.722815	0.0854223	-8.46167	2.63581e-17	9.33021e-17
YKR022C	YKR022C	YKR022C	CDS	NTR2	1249.01	1318.9	-0.0805496	0.0682548	-1.18013	0.237948	0.300078
YCR081C-A	YCR081C-A	YCR081C-A	CDS	YCR081C-A	1.32163	5.92853	-2.1401	1.0769	-1.98727	0.0468925	0.0681292
YPL174C	YPL174C	YPL174C	CDS	NIP100	1220.71	1014.7	0.265814	0.0749914	3.54459	0.000393219	0.000709256
YOR070C	YOR070C	YOR070C	CDS	GYP1	1559.55	1415.29	0.139947	0.0547003	2.55844	0.0105144	0.0165538
YDR403W	YDR403W	YDR403W	CDS	DIT1	277.983	296.717	-0.0931739	0.14063	-0.662546	0.507622	0.587542
YCR087C-A	YCR087C-A	YCR087C-A	CDS	YCR087C-A	404.782	1200.78	-1.5694	0.0810484	-19.3637	1.56266e-83	2.09877e-82
YOL042W	YOL042W	YOL042W	CDS	NGL1	1723.57	1091.53	0.657048	0.0655454	10.0243	1.19184e-23	5.21217e-23
YIL070C	YIL070C	YIL070C	CDS	MAM33	3317.85	5780.43	-0.801961	0.0524131	-15.3008	7.55721e-53	6.31334e-52
YCL037C	YCL037C	YCL037C	CDS	SRO9	192.986	373.893	-0.952855	0.136527	-6.97923	2.9681e-12	8.66605e-12
YCR089W	YCR089W	YCR089W	CDS	FIG2	3594.84	1594.56	1.17435	0.0557835	21.0519	2.19773e-98	3.45698e-97
YDR545C-A	YDR545C-A	YDR545C-A	CDS	YDR545C-A	0	0
YNR071C	YNR071C	YNR071C	CDS	YNR071C	768.251	777.707	-0.0179008	0.0871188	-0.205476	0.8372	0.874777
YML131W	YML131W	YML131W	CDS	YML131W	7355.5	4968.07	0.566531	0.0431908	13.1169	2.63419e-39	1.68164e-38
YNL245C	YNL245C	YNL245C	CDS	CWC25	829.893	720.479	0.203511	0.0775673	2.62367	0.00869873	0.0138356
YNR024W	YNR024W	YNR024W	CDS	MPP6	1419.63	1899.14	-0.420383	0.0778039	-5.40312	6.5493e-08	1.53956e-07
YFL013W-A	YFL013W-A	YFL013W-A	CDS	YFL013W-A	37.4757	37.8838	-0.0141515	0.351543	-0.0402555	0.967889	0.983092
YLR329W	YLR329W	YLR329W	CDS	REC102	66.7159	62.4297	0.101122	0.221099	0.457358	0.647413	0.71668
YCR091W	YCR091W	YCR091W	CDS	KIN82	7005.07	3386.63	1.04882	0.0444578	23.5913	4.73099e-123	9.54948e-122
YMR294W-A	YMR294W-A	YMR294W-A	CDS	YMR294W-A	14.0192	25.0807	-0.837447	0.452364	-1.85127	0.0641311	0.0910719
YBR056C-B	YBR056C-B	YBR056C-B	CDS	YBR056C-B	5.48807	5.17536	0.0941642	0.799869	0.117725	0.906286	0.933004
YKL002W	YKL002W	YKL002W	CDS	DID4	6432.06	4408.64	0.54511	0.0418662	13.0203	9.37918e-39	5.93335e-38
YDR328C	YDR328C	YDR328C	CDS	SKP1	7532.38	7158.48	0.0739003	0.0420451	1.75764	0.0788081	0.110214
YIR009W	YIR009W	YIR009W	CDS	MSL1	217.482	231.423	-0.0936223	0.131823	-0.710212	0.477573	0.557009
YBR154C	YBR154C	YBR154C	CDS	RPB5	1370.3	2685.01	-0.970968	0.0605593	-16.0333	7.4751e-58	6.77122e-57
YLR001C	YLR001C	YLR001C	CDS	YLR001C	3827.28	2902.98	0.398378	0.0417808	9.53495	1.49963e-21	6.10338e-21
YCR097W-A	YCR097W-A	YCR097W-A	CDS	YCR097W-A	41.646	16.4078	1.33895	0.976709	1.37088	0.170412	0.222293
YKR101W	YKR101W	YKR101W	CDS	SIR1	774.012	948.662	-0.29723	0.0752208	-3.95143	7.76847e-05	0.000148684
YCR098C	YCR098C	YCR098C	CDS	GIT1	350.576	818.76	-1.22634	0.0855804	-14.3297	1.42742e-46	1.0516e-45
YER115C	YER115C	YER115C	CDS	SPR6	1970.42	1307.93	0.591	0.0562147	10.5133	7.50543e-26	3.51562e-25
YHR124W	YHR124W	YHR124W	CDS	NDT80	1194.29	1003.53	0.250767	0.0670983	3.73731	0.000186001	0.000344023
YER148W	YER148W	YER148W	CDS	SPT15	3050.25	3025.16	0.0123078	0.0436778	0.281786	0.778108	0.828905
YCR099C	YCR099C	YCR099C	CDS	YCR099C	515.283	208.049	1.30573	0.13752	9.49488	2.20463e-21	8.9207e-21
YCR100C	YCR100C	YCR100C	CDS	YCR100C	646.811	200.264	1.69415	0.131921	12.8421	9.52466e-38	5.88675e-37
YOR303W	YOR303W	YOR303W	CDS	CPA1	18043.6	10288.6	0.810474	0.0327263	24.7652	2.12408e-135	4.86379e-134
YIL087C	YIL087C	YIL087C	CDS	AIM19	8545.08	4421.07	0.951035	0.0489933	19.4115	6.1659e-84	8.34547e-83
YMR192W	YMR192W	YMR192W	CDS	GYL1	1364.66	1433.78	-0.0697005	0.0651389	-1.07003	0.284607	0.352428
YJL221C	YJL221C	YJL221C	CDS	IMA4	1.87892	2.39832	-0.294901	1.32078	-0.223278	0.823319	0.865321
YCR101C	YCR101C	YCR101C	CDS	YCR101C	348.387	116.632	1.57693	0.132232	11.9255	8.71972e-33	4.81411e-32
YDL085W	YDL085W	YDL085W	CDS	NDE2	18699.1	10390.3	0.848068	0.0333185	25.4533	6.48436e-143	1.5946e-141
YLL038C	YLL038C	YLL038C	CDS	ENT4	469.652	573.049	-0.289945	0.0888158	-3.26457	0.00109632	0.0019056
YOR056C	YOR056C	YOR056C	CDS	NOB1	2017.13	2979.89	-0.562385	0.0492423	-11.4208	3.29301e-30	1.71247e-29
YOL108C	YOL108C	YOL108C	CDS	INO4	2020.01	1541.29	0.388917	0.0586848	6.62722	3.42064e-11	9.53302e-11
YJL123C	YJL123C	YJL123C	CDS	MTC1	8819.83	8347.01	0.0797866	0.0447013	1.78488	0.0742801	0.104311
YOR270C	YOR270C	YOR270C	CDS	VPH1	6799.56	7987.22	-0.231677	0.0489311	-4.73476	2.1931e-06	4.6969e-06
YPR069C	YPR069C	YPR069C	CDS	SPE3	2046.49	2813.38	-0.46043	0.0538716	-8.5468	1.26546e-17	4.53463e-17
YOL068C	YOL068C	YOL068C	CDS	HST1	3875.81	2952.16	0.392292	0.0442817	8.85902	8.07193e-19	2.99864e-18
YMR182C	YMR182C	YMR182C	CDS	RGM1	225.722	447.017	-0.990019	0.109893	-9.00896	2.08012e-19	7.88257e-19
YBR201W	YBR201W	YBR201W	CDS	DER1	889.912	749.703	0.248201	0.0722628	3.43469	0.000593224	0.00105208
YLL043W	YLL043W	YLL043W	CDS	FPS1	2891.37	2810.48	0.0418642	0.0413442	1.01258	0.311262	0.382337
YDR415C	YDR415C	YDR415C	CDS	YDR415C	1294.11	924.086	0.486053	0.0678316	7.16559	7.7453e-13	2.31861e-12
YGL161C	YGL161C	YGL161C	CDS	YIP5	4757.71	4046.1	0.234072	0.0472502	4.95388	7.27486e-07	1.60428e-06
YOL133W	YOL133W	YOL133W	CDS	HRT1	1275.16	982.984	0.373503	0.065229	5.72602	1.02812e-08	2.5212e-08
YNL263C	YNL263C	YNL263C	CDS	YIF1	1329.06	2060.94	-0.63339	0.0628938	-10.0708	7.43867e-24	3.27358e-23
YHR217C	YHR217C	YHR217C	CDS	YHR217C	3.91037	4.37675	-0.1333	0.87114	-0.153018	0.878384	0.910048
YDR128W	YDR128W	YDR128W	CDS	MTC5	3732.47	2878.08	0.375905	0.0551695	6.81363	9.5166e-12	2.72505e-11
YOR193W	YOR193W	YOR193W	CDS	PEX27	1026.69	859.594	0.254393	0.0684363	3.71722	0.000201424	0.000371565
YER028C	YER028C	YER028C	CDS	MIG3	703.835	640.244	0.134548	0.0936331	1.43697	0.150727	0.199069
YMR052W	YMR052W	YMR052W	CDS	FAR3	688.605	1080.9	-0.651164	0.0685571	-9.49813	2.137e-21	8.65708e-21
YDL003W	YDL003W	YDL003W	CDS	MCD1	249.716	1199.84	-2.25968	0.108323	-20.8606	1.22116e-96	1.89946e-95
YMR203W	YMR203W	YMR203W	CDS	TOM40	8985.59	10309	-0.198299	0.0375081	-5.28682	1.24461e-07	2.87636e-07
YKR076W	YKR076W	YKR076W	CDS	ECM4	8436.97	7253.17	0.218006	0.044403	4.90971	9.1213e-07	1.99884e-06
YEL064C	YEL064C	YEL064C	CDS	AVT2	1988.8	1000.12	0.988929	0.0666514	14.8373	8.40262e-50	6.63845e-49
YDR270W	YDR270W	YDR270W	CDS	CCC2	1976.23	1385.23	0.514209	0.0544952	9.43587	3.87772e-21	1.55823e-20
YPR033C	YPR033C	YPR033C	CDS	HTS1	3970.81	4481.73	-0.174043	0.0466168	-3.73348	0.000188855	0.000348932
YGR230W	YGR230W	YGR230W	CDS	BNS1	469.151	846.832	-0.852902	0.0807017	-10.5686	4.16782e-26	1.96809e-25
YPR062W	YPR062W	YPR062W	CDS	FCY1	5505.5	5439.46	0.0176114	0.043342	0.406336	0.684496	0.750238
YDR528W	YDR528W	YDR528W	CDS	HLR1	211.655	294.505	-0.477289	0.12971	-3.67967	0.000233534	0.000429211
YER173W	YER173W	YER173W	CDS	RAD24	1008.36	960.203	0.0703206	0.0876894	0.801929	0.422594	0.500576
YBR026C	YBR026C	YBR026C	CDS	ETR1	9579.52	10595.2	-0.145548	0.0374159	-3.89001	0.000100241	0.000189417
Q0060	Q0060	Q0060	CDS	AI3	0	0
YBR091C	YBR091C	YBR091C	CDS	TIM12	301.6	497.619	-0.722861	0.100059	-7.22437	5.03426e-13	1.51614e-12
YNL094W	YNL094W	YNL094W	CDS	APP1	4224.85	3505.22	0.269475	0.0394328	6.83378	8.27071e-12	2.37609e-11
YGL056C	YGL056C	YGL056C	CDS	SDS23	9998	9694.79	0.0443552	0.0408409	1.08605	0.277457	0.344369
YDL007C-A	YDL007C-A	YDL007C-A	CDS	YDL007C-A	0	3.04202	-3.99706	1.84397	-2.16763	0.0301866	0.0449804
YLR222C-A	YLR222C-A	YLR222C-A	CDS	YLR222C-A	256.41	322.644	-0.330022	0.127922	-2.57986	0.0098839	0.0156175
YDL010W	YDL010W	YDL010W	CDS	GRX6	2488.08	2404.71	0.0484056	0.0523191	0.925199	0.354862	0.429153
YML019W	YML019W	YML019W	CDS	OST6	633.07	913.085	-0.526622	0.0834012	-6.31432	2.71345e-10	7.22484e-10
YDL045C	YDL045C	YDL045C	CDS	FAD1	2991.79	2073.59	0.52834	0.0507285	10.4151	2.11678e-25	9.82301e-25
YLR163C	YLR163C	YLR163C	CDS	MAS1	3687.1	2857.37	0.367901	0.0516541	7.12239	1.06073e-12	3.15642e-12
YPR071W	YPR071W	YPR071W	CDS	YPR071W	396.774	499.584	-0.331413	0.10012	-3.31014	0.000932477	0.00163178
YKL225W	YKL225W	YKL225W	CDS	YKL225W	1.67516	2.7611	-0.725897	3.18572	-0.22786	0.819755	0.862614
YHL002C-A	YHL002C-A	YHL002C-A	CDS	YHL002C-A	6.71224	6.19162	0.108091	0.699968	0.154422	0.877277	0.909247
YJL175W	YJL175W	YJL175W	CDS	YJL175W	5.03101	4.52613	0.190827	0.736119	0.259234	0.795454	0.844936
YBL079W	YBL079W	YBL079W	CDS	NUP170	3740.36	2869.87	0.382029	0.0462732	8.25595	1.50705e-16	5.20277e-16
YNL056W	YNL056W	YNL056W	CDS	OCA2	1267.44	1763.23	-0.477388	0.0580968	-8.21711	2.08459e-16	7.16474e-16
YFL001W	YFL001W	YFL001W	CDS	DEG1	997.862	1302.22	-0.385571	0.0597532	-6.45273	1.09856e-10	2.98885e-10
YDR150W	YDR150W	YDR150W	CDS	NUM1	17496.8	13544.1	0.3693	0.0299173	12.344	5.24597e-35	3.03042e-34
YMR167W	YMR167W	YMR167W	CDS	MLH1	1336.13	1303.44	0.0355752	0.0674852	0.527156	0.598085	0.672139
YKL125W	YKL125W	YKL125W	CDS	RRN3	1246.54	1116	0.157382	0.0655013	2.40273	0.0162733	0.0250834
YKL170W	YKL170W	YKL170W	CDS	MRPL38	2329.12	2585.46	-0.15183	0.0632956	-2.39875	0.0164512	0.0253519
YPR157W	YPR157W	YPR157W	CDS	TDA6	227.733	405.147	-0.823231	0.124417	-6.61672	3.67255e-11	1.02188e-10
YDL009C	YDL009C	YDL009C	CDS	YDL009C	5.28156	14.1385	-1.43438	0.59127	-2.42593	0.015269	0.0236555
YPR137C-A	YPR137C-A	YPR137C-A	CDS	YPR137C-A	5.3873	5.90881	-0.112221	0.869406	-0.129078	0.897296	0.92566
YLR384C	YLR384C	YLR384C	CDS	IKI3	3282.84	4038.56	-0.298774	0.0397026	-7.52532	5.25923e-14	1.65676e-13
YDR307W	YDR307W	YDR307W	CDS	PMT7	977.454	1042.63	-0.0951887	0.06538	-1.45593	0.145412	0.192852
YML099C	YML099C	YML099C	CDS	ARG81	2345.34	2163.81	0.114375	0.0478929	2.38814	0.0169339	0.0260441
YLR421C	YLR421C	YLR421C	CDS	RPN13	4428.9	3120.16	0.504472	0.0523055	9.64473	5.17468e-22	2.12838e-21
YLR090W	YLR090W	YLR090W	CDS	XDJ1	3518.84	2584.09	0.44654	0.0442948	10.0811	6.69765e-24	2.94933e-23
YMR325W	YMR325W	YMR325W	CDS	PAU19	4.54999	5.35675	-0.260371	0.737698	-0.352951	0.724125	0.784441
YJR064W	YJR064W	YJR064W	CDS	CCT5	2095.41	2520.66	-0.266235	0.0681698	-3.90547	9.40411e-05	0.000178377
YDL014W	YDL014W	YDL014W	CDS	NOP1	1211.88	4464.82	-1.8822	0.0527207	-35.7012	3.78112e-279	2.75076e-277
YER046W	YER046W	YER046W	CDS	SPO73	1482.98	1153.04	0.360794	0.0659051	5.47444	4.38886e-08	1.04329e-07
YMR029C	YMR029C	YMR029C	CDS	FAR8	3248.08	3089.03	0.0721848	0.051599	1.39896	0.161826	0.212083
YDL026W	YDL026W	YDL026W	CDS	YDL026W	60.9244	23.2941	1.38916	0.348053	3.99122	6.57331e-05	0.000126958
YKR050W	YKR050W	YKR050W	CDS	TRK2	4651.73	2599.33	0.840037	0.0461056	18.2199	3.5905e-74	4.11758e-73
YMR121C	YMR121C	YMR121C	CDS	RPL15B	1239.94	1806.7	-0.545466	0.0744874	-7.32293	2.42609e-13	7.40874e-13
YGL017W	YGL017W	YGL017W	CDS	ATE1	1075.29	812.457	0.404963	0.0798861	5.06926	3.99374e-07	8.93982e-07
YDL032W	YDL032W	YDL032W	CDS	YDL032W	32.1608	8.74736	1.87498	0.466662	4.01786	5.87286e-05	0.00011406
YNL038W	YNL038W	YNL038W	CDS	GPI15	649.889	846.768	-0.382467	0.0825549	-4.63289	3.60604e-06	7.59486e-06
YHR001W-A	YHR001W-A	YHR001W-A	CDS	QCR10	20373.1	18531.3	0.136536	0.0455111	3.00005	0.00269932	0.00453284
YDL034W	YDL034W	YDL034W	CDS	YDL034W	0	3.39061	-4.15312	1.66201	-2.49885	0.0124598	0.0194849
YIL139C	YIL139C	YIL139C	CDS	REV7	316.604	366.188	-0.212648	0.104135	-2.04204	0.0411479	0.0603016
YLR246W	YLR246W	YLR246W	CDS	ERF2	1486.72	1540.18	-0.0518324	0.057284	-0.904831	0.365555	0.440634
YJR119C	YJR119C	YJR119C	CDS	JHD2	526.134	435.704	0.27258	0.120438	2.26324	0.0236212	0.0357776
YLR359W	YLR359W	YLR359W	CDS	ADE13	6583.16	7158.01	-0.120713	0.0448118	-2.69377	0.00706496	0.0113586
YLR199C	YLR199C	YLR199C	CDS	PBA1	1777.29	1746.08	0.025235	0.0658401	0.383277	0.701515	0.764933
YJL206C	YJL206C	YJL206C	CDS	YJL206C	2173.28	1168.77	0.895085	0.0539665	16.5859	8.80805e-62	8.52014e-61
YIL142W	YIL142W	YIL142W	CDS	CCT2	3943.74	4249.83	-0.107842	0.0456185	-2.36399	0.0180792	0.0277141
YGL082W	YGL082W	YGL082W	CDS	YGL082W	2686.19	1780.09	0.594264	0.0528126	11.2523	2.25565e-29	1.15241e-28
YNL138W	YNL138W	YNL138W	CDS	SRV2	7965.48	7584.65	0.0711989	0.0399988	1.78003	0.0750718	0.105239
YDL236W	YDL236W	YDL236W	CDS	PHO13	975.232	1928.71	-0.986024	0.0646857	-15.2433	1.82435e-52	1.50784e-51
YGL142C	YGL142C	YGL142C	CDS	GPI10	1585.8	1103.38	0.52188	0.0685111	7.61745	2.58736e-14	8.2324e-14
YGR179C	YGR179C	YGR179C	CDS	OKP1	604.382	950.466	-0.654066	0.0793313	-8.24475	1.65511e-16	5.70265e-16
YJR086W	YJR086W	YJR086W	CDS	STE18	1572.4	1580.7	-0.00943243	0.0779398	-0.121022	0.903674	0.930589
YBR139W	YBR139W	YBR139W	CDS	YBR139W	15581.5	8567.74	0.863088	0.0359237	24.0256	1.50204e-127	3.15972e-126
YHR188C	YHR188C	YHR188C	CDS	GPI16	5665.43	4392.26	0.367912	0.0381075	9.65461	4.69963e-22	1.93641e-21
YKL106C-A	YKL106C-A	YKL106C-A	CDS	YKL106C-A	4.72317	4.87472	0.00435182	0.973288	0.00447126	0.996432	1
YNL116W	YNL116W	YNL116W	CDS	DMA2	2219.33	2068.33	0.103383	0.0573015	1.80419	0.0712012	0.100256
YNL139C	YNL139C	YNL139C	CDS	THO2	3244.87	2334.12	0.475467	0.0481443	9.87587	5.29722e-23	2.26413e-22
YDL037C	YDL037C	YDL037C	CDS	BSC1	609.779	269.771	1.17383	0.094897	12.3695	3.82306e-35	2.21212e-34
YNL005C	YNL005C	YNL005C	CDS	MRP7	5264.17	4971.3	0.0823726	0.0380495	2.16488	0.030397	0.0452728
YDL050C	YDL050C	YDL050C	CDS	YDL050C	3.48112	7.1415	-1.04554	0.8549	-1.22299	0.221333	0.281065
YGL255W	YGL255W	YGL255W	CDS	ZRT1	8656.98	5377	0.687242	0.0487434	14.0992	3.84288e-45	2.74424e-44
YFR007W	YFR007W	YFR007W	CDS	YFH7	1261.86	898.65	0.489359	0.0634756	7.70941	1.26405e-14	4.07391e-14
YLR333C	YLR333C	YLR333C	CDS	RPS25B	1614.36	2285.87	-0.502455	0.0533715	-9.41428	4.76319e-21	1.90965e-20
YHL030W	YHL030W	YHL030W	CDS	ECM29	1870.74	1280.86	0.546109	0.0665394	8.20731	2.26204e-16	7.76318e-16
YBR294W	YBR294W	YBR294W	CDS	SUL1	463.565	348.07	0.410994	0.105036	3.91289	9.11968e-05	0.00017317
YGL077C	YGL077C	YGL077C	CDS	HNM1	3194.51	4116.68	-0.36474	0.046344	-7.87028	3.53846e-15	1.1624e-14
YPL204W	YPL204W	YPL204W	CDS	HRR25	5151.31	4763.25	0.112422	0.0394292	2.85123	0.00435503	0.00715492
YLR379W	YLR379W	YLR379W	CDS	YLR379W	19.024	12.6894	0.576227	0.482797	1.19352	0.232667	0.293895
YIL009C-A	YIL009C-A	YIL009C-A	CDS	EST3	1127.83	623.184	0.856717	0.0805817	10.6317	2.12287e-26	1.01202e-25
YDL051W	YDL051W	YDL051W	CDS	LHP1	1153.04	2976.21	-1.36774	0.0503246	-27.1784	1.16989e-162	3.40438e-161
YBR302C	YBR302C	YBR302C	CDS	COS2	49.4194	83.165	-0.745845	0.243527	-3.06268	0.00219366	0.00372038
YOR091W	YOR091W	YOR091W	CDS	TMA46	1231.51	2149.98	-0.803213	0.0577798	-13.9013	6.22139e-44	4.35372e-43
YGR026W	YGR026W	YGR026W	CDS	YGR026W	4538.63	4172.68	0.121394	0.043261	2.80608	0.00501476	0.00818296
YAL040C	YAL040C	YAL040C	CDS	CLN3	2519.44	2877.07	-0.19084	0.0445057	-4.28799	1.80301e-05	3.61016e-05
YDR288W	YDR288W	YDR288W	CDS	NSE3	1525.09	1046.32	0.544667	0.0691386	7.8779	3.32925e-15	1.09522e-14
YGL208W	YGL208W	YGL208W	CDS	SIP2	7118.55	4942.9	0.526509	0.039543	13.3149	1.89734e-40	1.24073e-39
YNL284C	YNL284C	YNL284C	CDS	MRPL10	3600.95	3224.24	0.15951	0.0500666	3.18596	0.00144277	0.00248306
YIL164C	YIL164C	YIL164C	CDS	NIT1	848.29	535.49	0.666642	0.0807051	8.26022	1.45401e-16	5.02961e-16
YDL055C	YDL055C	YDL055C	CDS	PSA1	6256.28	20011.6	-1.6778	0.0324132	-51.7629	0	0
YBR237W	YBR237W	YBR237W	CDS	PRP5	2761.32	2058.29	0.424288	0.0479682	8.84519	9.13696e-19	3.3799e-18
YBR197C	YBR197C	YBR197C	CDS	YBR197C	828.34	924.275	-0.158932	0.0806255	-1.97124	0.0486962	0.0705443
YCR076C	YCR076C	YCR076C	CDS	FUB1	2040.33	1822.92	0.162874	0.0610672	2.66712	0.00765032	0.0122433
YHR147C	YHR147C	YHR147C	CDS	MRPL6	3810.63	3747.05	0.0234233	0.0464172	0.504627	0.613821	0.686128
YJL093C	YJL093C	YJL093C	CDS	TOK1	3011.82	2170.41	0.473669	0.0544576	8.69793	3.3799e-18	1.23072e-17
YDL061C	YDL061C	YDL061C	CDS	RPS29B	1283.78	3417.44	-1.41138	0.050362	-28.0247	8.13193e-173	2.55826e-171
YMR317W	YMR317W	YMR317W	CDS	YMR317W	313.883	159.684	0.975583	0.127524	7.65021	2.00658e-14	6.41076e-14
YOR251C	YOR251C	YOR251C	CDS	TUM1	2105.23	2568.06	-0.285344	0.0554531	-5.14569	2.66544e-07	6.0381e-07
YPR181C	YPR181C	YPR181C	CDS	SEC23	5900.65	4697.51	0.329827	0.049624	6.64652	3.00095e-11	8.37674e-11
YCL008C	YCL008C	YCL008C	CDS	STP22	3965.49	3362.61	0.239084	0.0695337	3.43839	0.000585193	0.00103862
YDL062W	YDL062W	YDL062W	CDS	YDL062W	59.1218	14.6224	1.99497	0.387182	5.15253	2.56998e-07	5.83131e-07
YML005W	YML005W	YML005W	CDS	TRM12	895.767	1128.33	-0.330914	0.0676738	-4.88984	1.00917e-06	2.20569e-06
YNL215W	YNL215W	YNL215W	CDS	IES2	4866.59	3410.57	0.512239	0.0483773	10.5884	3.37213e-26	1.59993e-25
YCR075W-A	YCR075W-A	YCR075W-A	CDS	YCR075W-A	464.315	509.673	-0.134893	0.108495	-1.24331	0.213752	0.272417
YDL059C	YDL059C	YDL059C	CDS	RAD59	559.323	527.326	0.0842575	0.0985749	0.854756	0.392686	0.469449
YOR204W	YOR204W	YOR204W	CDS	DED1	2097.18	1638.25	0.357203	0.0576633	6.19463	5.84206e-10	1.52927e-09
YEL012W	YEL012W	YEL012W	CDS	UBC8	12415.4	9507.02	0.384615	0.0380243	10.115	4.74079e-24	2.09026e-23
YBL040C	YBL040C	YBL040C	CDS	ERD2	2275.65	2090.52	0.12295	0.0500253	2.45775	0.0139809	0.0217274
YDL063C	YDL063C	YDL063C	CDS	SYO1	146.477	506.361	-1.7946	0.130117	-13.7921	2.84196e-43	1.96907e-42
YDL071C	YDL071C	YDL071C	CDS	YDL071C	81.8976	36.2627	1.17107	0.284133	4.12155	3.76331e-05	7.40157e-05
YDR483W	YDR483W	YDR483W	CDS	KRE2	7675.28	9873.46	-0.36378	0.0345159	-10.5395	5.67994e-26	2.66949e-25
YER061C	YER061C	YER061C	CDS	CEM1	3452.82	2226.38	0.633911	0.0503019	12.6021	2.05543e-36	1.23008e-35
YLR022C	YLR022C	YLR022C	CDS	SDO1	366.969	439.433	-0.260582	0.102838	-2.53391	0.0112797	0.0176988
YLR402W	YLR402W	YLR402W	CDS	YLR402W	74.1848	54.1703	0.463016	0.259657	1.78318	0.0745565	0.104603
YLR073C	YLR073C	YLR073C	CDS	RFU1	215.56	398.427	-0.884305	0.128664	-6.87295	6.28872e-12	1.81865e-11
YER183C	YER183C	YER183C	CDS	FAU1	657.22	993.888	-0.593817	0.0713955	-8.3173	8.99907e-17	3.12995e-16
YHR090C	YHR090C	YHR090C	CDS	YNG2	2111.37	2152.98	-0.027823	0.0594806	-0.467766	0.639952	0.710335
YOL021C	YOL021C	YOL021C	CDS	DIS3	1682.75	1949.38	-0.213509	0.0553814	-3.85524	0.000115616	0.000217704
YHR030C	YHR030C	YHR030C	CDS	SLT2	3408.03	2912.21	0.226234	0.0497241	4.54979	5.36996e-06	1.11851e-05
YBR295W	YBR295W	YBR295W	CDS	PCA1	2203.15	1387.25	0.666926	0.0536647	12.4277	1.84986e-35	1.08293e-34
YKL018W	YKL018W	YKL018W	CDS	SWD2	693.594	745.013	-0.103728	0.0724243	-1.43223	0.152078	0.200626
YIL011W	YIL011W	YIL011W	CDS	TIR3	297.681	450.423	-0.594314	0.116816	-5.08759	3.62636e-07	8.14357e-07
YEL034W	YEL034W	YEL034W	CDS	HYP2	15657.5	26613.1	-0.765299	0.0281136	-27.2217	3.59483e-163	1.05047e-161
YDL075W	YDL075W	YDL075W	CDS	RPL31A	1755.9	6359.43	-1.85609	0.0452369	-41.0304	0	0
YNR050C	YNR050C	YNR050C	CDS	LYS9	1949.13	1841.05	0.0824034	0.0583867	1.41134	0.158145	0.207766
YKL208W	YKL208W	YKL208W	CDS	CBT1	1157.23	961.629	0.268905	0.0744772	3.61056	0.000305536	0.000555693
YGR004W	YGR004W	YGR004W	CDS	PEX31	373.866	526.788	-0.495121	0.099603	-4.97094	6.66294e-07	1.47399e-06
YML110C	YML110C	YML110C	CDS	COQ5	13924.3	16436.8	-0.239477	0.0307401	-7.79037	6.68125e-15	2.17234e-14
YGL048C	YGL048C	YGL048C	CDS	RPT6	9971.9	7386.12	0.433546	0.0386309	11.2228	3.1521e-29	1.60454e-28
YGL243W	YGL243W	YGL243W	CDS	TAD1	614.853	841.753	-0.455674	0.0811853	-5.61276	1.99121e-08	4.80532e-08
YKL106W	YKL106W	YKL106W	CDS	AAT1	377.612	444.647	-0.234189	0.0976546	-2.39813	0.0164788	0.0253889
YPR029C	YPR029C	YPR029C	CDS	APL4	2362.84	2396.52	-0.0211656	0.0483139	-0.438085	0.661325	0.729076
YJL034W	YJL034W	YJL034W	CDS	KAR2	9886.46	8388.5	0.237317	0.0437607	5.42306	5.85876e-08	1.38328e-07
YFL048C	YFL048C	YFL048C	CDS	EMP47	2079.27	2459.25	-0.242603	0.0537335	-4.51494	6.33361e-06	1.31375e-05
YLR117C	YLR117C	YLR117C	CDS	CLF1	2866.63	1972.42	0.538393	0.0624167	8.62579	6.36543e-18	2.29866e-17
YOR176W	YOR176W	YOR176W	CDS	HEM15	2701.48	3797.8	-0.490518	0.0479854	-10.2222	1.57649e-24	7.05112e-24
YOR109W	YOR109W	YOR109W	CDS	INP53	3239.12	2389.6	0.43988	0.0490193	8.9736	2.86977e-19	1.08221e-18
YBL089W	YBL089W	YBL089W	CDS	AVT5	1157.96	853.072	0.441872	0.0630325	7.01023	2.3792e-12	6.96993e-12
YDL084W	YDL084W	YDL084W	CDS	SUB2	5563.3	9121.31	-0.713418	0.0419529	-17.0052	7.51343e-65	7.59389e-64
YCL055W	YCL055W	YCL055W	CDS	KAR4	1668.13	1077.24	0.631265	0.0690144	9.14686	5.8611e-20	2.25905e-19
YDL079C	YDL079C	YDL079C	CDS	MRK1	5571.08	2709.77	1.03989	0.0431846	24.0802	4.03446e-128	8.59045e-127
YBL054W	YBL054W	YBL054W	CDS	TOD6	910.857	1451.22	-0.671932	0.0650603	-10.3278	5.27348e-25	2.41192e-24
YCR024C	YCR024C	YCR024C	CDS	SLM5	980.462	910.355	0.106511	0.0685976	1.5527	0.120495	0.162805
tF%28GAA%29P2	tF%28GAA%29P2	tF%28GAA%29P2	noncoding_exon	tF%28GAA%29P2	0	0
YMR102C	YMR102C	YMR102C	CDS	YMR102C	961.483	975.072	-0.0209818	0.0732129	-0.286586	0.774429	0.825742
YCR071C	YCR071C	YCR071C	CDS	IMG2	2316.44	2165.99	0.0956687	0.0582051	1.64365	0.100249	0.137877
tK%28CUU%29D2	tK%28CUU%29D2	tK%28CUU%29D2	noncoding_exon	tK%28CUU%29D2	0	0
tK%28CUU%29D1	tK%28CUU%29D1	tK%28CUU%29D1	noncoding_exon	tK%28CUU%29D1	1.37064	2.09768	-0.602916	1.63568	-0.368601	0.712425	0.774409
YDR175C	YDR175C	YDR175C	CDS	RSM24	3774.34	3626.3	0.0578774	0.0391387	1.47877	0.139201	0.185424
YOR189W	YOR189W	YOR189W	CDS	IES4	1053.65	1155.26	-0.135393	0.0667081	-2.02963	0.0423941	0.0619934
YOR154W	YOR154W	YOR154W	CDS	SLP1	891.982	1375.62	-0.626711	0.079292	-7.90384	2.7045e-15	8.92675e-15
YPR121W	YPR121W	YPR121W	CDS	THI22	564.439	458.759	0.29592	0.115441	2.56339	0.0103655	0.0163304
YDL081C	YDL081C	YDL081C	CDS	RPP1A	4142.72	8496.88	-1.0361	0.0689314	-15.0309	4.60502e-51	3.71809e-50
YOR396C-A	YOR396C-A	YOR396C-A	CDS	YOR396C-A	0	0
YDL082W	YDL082W	YDL082W	CDS	RPL13A	1429.28	4447.58	-1.63557	0.059214	-27.6214	6.15265e-168	1.86827e-166
YNL315C	YNL315C	YNL315C	CDS	ATP11	3593.57	3489.96	0.0423597	0.0432076	0.980377	0.3269	0.399201
YPR174C	YPR174C	YPR174C	CDS	YPR174C	539.399	699.232	-0.369582	0.0884852	-4.17677	2.9568e-05	5.85824e-05
YJR045C	YJR045C	YJR045C	CDS	SSC1	52380.4	32184.7	0.702707	0.0399931	17.5707	4.12973e-69	4.49954e-68
YMR008C	YMR008C	YMR008C	CDS	PLB1	13702.1	12035.8	0.187367	0.0504259	3.71568	0.000202659	0.000373745
YPL026C	YPL026C	YPL026C	CDS	SKS1	3338.23	3358.43	-0.00970108	0.0424465	-0.228549	0.81922	0.862181
YDL171C	YDL171C	YDL171C	CDS	GLT1	6568.14	10098.5	-0.620408	0.0562109	-11.0371	2.5296e-28	1.26825e-27
YKL062W	YKL062W	YKL062W	CDS	MSN4	4581.97	3549.85	0.368205	0.0436917	8.42736	3.53562e-17	1.24585e-16
YJR010W	YJR010W	YJR010W	CDS	MET3	756.107	1033.92	-0.450547	0.0738021	-6.1048	1.02931e-09	2.66446e-09
YJL218W	YJL218W	YJL218W	CDS	YJL218W	349.727	396.498	-0.177863	0.12785	-1.39118	0.16417	0.214752
YIL126W	YIL126W	YIL126W	CDS	STH1	2204.95	3299.19	-0.58246	0.0510115	-11.4182	3.39128e-30	1.76226e-29
YDR093W	YDR093W	YDR093W	CDS	DNF2	2005.04	2322.48	-0.210194	0.060104	-3.49717	0.000470221	0.000843355
YMR282C	YMR282C	YMR282C	CDS	AEP2	1453.9	1611.79	-0.148615	0.0577216	-2.57469	0.0100329	0.0158318
YIL109C	YIL109C	YIL109C	CDS	SEC24	5600.22	4206.7	0.413076	0.0449504	9.1896	3.94297e-20	1.53243e-19
YFL022C	YFL022C	YFL022C	CDS	FRS2	2648.06	3873.77	-0.547172	0.0591069	-9.25733	2.09599e-20	8.23308e-20
YPL109C	YPL109C	YPL109C	CDS	YPL109C	2878.79	2460.37	0.22602	0.0447599	5.0496	4.42742e-07	9.88842e-07
YJL156C	YJL156C	YJL156C	CDS	SSY5	2127.42	1800.21	0.239722	0.055223	4.34099	1.41844e-05	2.86725e-05
YNL071W	YNL071W	YNL071W	CDS	LAT1	21682.4	22660.1	-0.0635404	0.040742	-1.55958	0.118859	0.16075
YMR088C	YMR088C	YMR088C	CDS	VBA1	1594.86	2505.56	-0.651684	0.0520617	-12.5175	5.98567e-36	3.55174e-35
YGR211W	YGR211W	YGR211W	CDS	ZPR1	1365.11	1861.55	-0.448038	0.0568477	-7.88136	3.23836e-15	1.06582e-14
YKL139W	YKL139W	YKL139W	CDS	CTK1	2045.73	1780	0.202303	0.0539791	3.7478	0.000178391	0.000330472
YJL069C	YJL069C	YJL069C	CDS	UTP18	342.414	673.129	-0.976963	0.100448	-9.72605	2.33489e-22	9.72383e-22
YDR323C	YDR323C	YDR323C	CDS	PEP7	454.838	529.519	-0.215575	0.108564	-1.98569	0.0470677	0.068327
YDL083C	YDL083C	YDL083C	CDS	RPS16B	1080.37	3750.67	-1.79669	0.0637476	-28.1845	9.05519e-175	2.88774e-173
YHR042W	YHR042W	YHR042W	CDS	NCP1	7104.24	8149.17	-0.19737	0.0458743	-4.3024	1.68955e-05	3.38881e-05
YJL016W	YJL016W	YJL016W	CDS	YJL016W	5186.37	3134.42	0.726497	0.046435	15.6455	3.56657e-55	3.10198e-54
YDR444W	YDR444W	YDR444W	CDS	YDR444W	2157.95	1669.56	0.37179	0.0540751	6.87543	6.18031e-12	1.78878e-11
YPL189W	YPL189W	YPL189W	CDS	GUP2	98.3373	163.271	-0.735393	0.175763	-4.18401	2.86413e-05	5.67624e-05
YLR285W	YLR285W	YLR285W	CDS	NNT1	756.039	766.706	-0.0200315	0.0752898	-0.266059	0.790194	0.839859
YDL089W	YDL089W	YDL089W	CDS	NUR1	2983.87	1404.97	1.08477	0.0591495	18.3395	4.00373e-75	4.66034e-74
YDL094C	YDL094C	YDL094C	CDS	YDL094C	45.4674	22.3516	1.02783	0.31511	3.2618	0.00110705	0.00192378
YDL096C	YDL096C	YDL096C	CDS	OPI6	22.8152	2.97625	2.8989	0.644664	4.49677	6.89951e-06	1.42605e-05
YCR024C-A	YCR024C-A	YCR024C-A	CDS	PMP1	4613.01	5173.29	-0.165556	0.0435994	-3.79721	0.000146336	0.000272972
YCR024C-B	YCR024C-B	YCR024C-B	CDS	YCR024C-B	10423.5	10583.3	-0.0220406	0.0377	-0.584632	0.558795	0.63615
YKR024C	YKR024C	YKR024C	CDS	DBP7	455.787	872.876	-0.936852	0.085079	-11.0116	3.36149e-28	1.6805e-27
YBR156C	YBR156C	YBR156C	CDS	SLI15	857.205	752.149	0.189953	0.0824651	2.30343	0.0212547	0.0323687
YOL013W-A	YOL013W-A	YOL013W-A	CDS	YOL013W-A	16.948	29.3934	-0.779427	0.437451	-1.78175	0.0747907	0.104887
YOR076C	YOR076C	YOR076C	CDS	SKI7	789.82	658.494	0.265011	0.0840248	3.15396	0.00161073	0.00276736
YEL059C-A	YEL059C-A	YEL059C-A	CDS	SOM1	1017.12	1016.95	0.00105431	0.0819334	0.0128679	0.989733	0.999898
YDR405W	YDR405W	YDR405W	CDS	MRP20	4902.39	5463.94	-0.156021	0.0585664	-2.66399	0.00772188	0.0123465
YOL091W	YOL091W	YOL091W	CDS	SPO21	153.38	223.725	-0.547071	0.143434	-3.81408	0.000136692	0.000255528
YCL031C	YCL031C	YCL031C	CDS	RRP7	2451.16	2480.61	-0.0178559	0.0630815	-0.28306	0.777131	0.828244
YIL027C	YIL027C	YIL027C	CDS	EMC5	1589.48	1529.53	0.053153	0.0790222	0.672634	0.50118	0.581146
YLR459W	YLR459W	YLR459W	CDS	GAB1	1071.66	1096.72	-0.0321568	0.0704809	-0.456248	0.648211	0.717341
YDL101C	YDL101C	YDL101C	CDS	DUN1	612.194	1260.54	-1.04261	0.0723151	-14.4175	4.01445e-47	3.01797e-46
YNR026C	YNR026C	YNR026C	CDS	SEC12	580.541	703.068	-0.277964	0.101441	-2.74016	0.00614095	0.00992099
YHL044W	YHL044W	YHL044W	CDS	YHL044W	802.204	538.146	0.575423	0.0793173	7.2547	4.02563e-13	1.21868e-12
YPR204W	YPR204W	YPR204W	CDS	YPR204W	153.843	194.543	-0.332149	0.149572	-2.22067	0.0263735	0.0396028
YNL297C	YNL297C	YNL297C	CDS	MON2	2891.15	2433.97	0.249448	0.047659	5.23402	1.65866e-07	3.80429e-07
YHR068W	YHR068W	YHR068W	CDS	DYS1	1334.22	1978.29	-0.566765	0.0569433	-9.95314	2.44341e-23	1.05468e-22
YGR149W	YGR149W	YGR149W	CDS	YGR149W	3339.8	2249.54	0.571028	0.045198	12.6339	1.37251e-36	8.24215e-36
YDR458C	YDR458C	YDR458C	CDS	HEH2	3180.79	2359.39	0.430984	0.0603454	7.14195	9.20157e-13	2.74397e-12
YKL193C	YKL193C	YKL193C	CDS	SDS22	6088	5039.29	0.272882	0.0469754	5.80905	6.28294e-09	1.55714e-08
YDL114W	YDL114W	YDL114W	CDS	YDL114W	9.52041	37.0299	-1.92114	0.466544	-4.1178	3.82504e-05	7.51451e-05
YLR310C	YLR310C	YLR310C	CDS	CDC25	5195.85	5587.45	-0.105339	0.0389273	-2.70605	0.00680892	0.0109596
YNR008W	YNR008W	YNR008W	CDS	LRO1	1079.84	1072.75	0.00935327	0.0703985	0.132862	0.894303	0.92339
YJR150C	YJR150C	YJR150C	CDS	DAN1	12.7576	19.3754	-0.604628	0.447153	-1.35217	0.17632	0.229144
YLR003C	YLR003C	YLR003C	CDS	CMS1	547.644	1029.92	-0.913628	0.0793882	-11.5084	1.19727e-30	6.28703e-30
YER113C	YER113C	YER113C	CDS	TMN3	1101.94	1033.88	0.0924153	0.0664182	1.39141	0.1641	0.214701
YHR122W	YHR122W	YHR122W	CDS	CIA2	1406.14	1584.16	-0.173271	0.0645434	-2.68456	0.00726248	0.0116547
YHL017W	YHL017W	YHL017W	CDS	YHL017W	1619.4	1278.54	0.341116	0.0668498	5.10272	3.34814e-07	7.53088e-07
YJR010C-A	YJR010C-A	YJR010C-A	CDS	SPC1	310.371	470.028	-0.596568	0.106994	-5.57571	2.46518e-08	5.92458e-08
YIL085C	YIL085C	YIL085C	CDS	KTR7	1603.32	1744.58	-0.123078	0.0595907	-2.06538	0.038887	0.0572243
YMR190C	YMR190C	YMR190C	CDS	SGS1	1959.5	1840.38	0.0899529	0.049255	1.82627	0.0678098	0.0958478
YCR052W	YCR052W	YCR052W	CDS	RSC6	1794.28	2106.31	-0.230358	0.0630873	-3.65141	0.000260803	0.000476944
YDL121C	YDL121C	YDL121C	CDS	YDL121C	627.454	1581.2	-1.3332	0.0772183	-17.2654	8.57807e-67	9.02248e-66
YOR058C	YOR058C	YOR058C	CDS	ASE1	1534.23	1624.32	-0.0839387	0.0611767	-1.37207	0.170042	0.221893
YER172C-A	YER172C-A	YER172C-A	CDS	YER172C-A	1.37064	1.11769	0.334482	2.02326	0.165318	0.868694	0.902153
YAL064W-B	YAL064W-B	YAL064W-B	CDS	YAL064W-B	133.473	89.2325	0.579538	0.206741	2.80321	0.00505974	0.0082525
YDR413C	YDR413C	YDR413C	CDS	YDR413C	4.77494	4.81509	0.0257111	1.00269	0.0256421	0.979543	0.991755
YBR203W	YBR203W	YBR203W	CDS	COS111	4456.35	2916.06	0.612477	0.0422654	14.4912	1.37667e-47	1.0428e-46
YAR029W	YAR029W	YAR029W	CDS	YAR029W	104.083	80.9346	0.353455	0.170076	2.07821	0.0376896	0.0555325
YNL238W	YNL238W	YNL238W	CDS	KEX2	1628.5	1641.26	-0.0107779	0.0553108	-0.194861	0.845502	0.882263
YBR271W	YBR271W	YBR271W	CDS	EFM2	679.062	827.279	-0.284468	0.0810332	-3.51051	0.000447254	0.000803815
YJL198W	YJL198W	YJL198W	CDS	PHO90	1130.56	1236.95	-0.127114	0.0654551	-1.942	0.0521367	0.0749995
YOL135C	YOL135C	YOL135C	CDS	MED7	886.016	1144.34	-0.369713	0.0671734	-5.50386	3.71571e-08	8.86592e-08
YOR323C	YOR323C	YOR323C	CDS	PRO2	3028.99	3951.1	-0.382175	0.052151	-7.32825	2.33178e-13	7.127e-13
YLL041C	YLL041C	YLL041C	CDS	SDH2	37665.3	35767.7	0.0745617	0.0324762	2.29589	0.0216824	0.0329841
YKR074W	YKR074W	YKR074W	CDS	AIM29	2966.34	2869.94	0.0472809	0.0598208	0.790377	0.429308	0.507582
YMR274C	YMR274C	YMR274C	CDS	RCE1	227.243	360.53	-0.666704	0.12538	-5.31744	1.05235e-07	2.44499e-07
YER026C	YER026C	YER026C	CDS	CHO1	7479.49	7519.77	-0.00763659	0.039951	-0.191149	0.848409	0.884503
YMR201C	YMR201C	YMR201C	CDS	RAD14	2416.7	1604.04	0.591089	0.0615069	9.61012	7.24674e-22	2.97189e-21
YLR069C	YLR069C	YLR069C	CDS	MEF1	4309.13	5192.42	-0.268447	0.052187	-5.14396	2.69013e-07	6.09204e-07
YDL127W	YDL127W	YDL127W	CDS	PCL2	483.236	1157.9	-1.26493	0.0789353	-16.0249	8.55646e-58	7.74072e-57
YMR050C	YMR050C	YMR050C	CDS	YMR050C	952.966	818.216	0.220126	0.858947	0.256275	0.797739	0.84659
YDR069C	YDR069C	YDR069C	CDS	DOA4	2566.97	1662.88	0.626121	0.0518657	12.072	1.48557e-33	8.36038e-33
YGR232W	YGR232W	YGR232W	CDS	NAS6	3921.6	2995.89	0.388954	0.044956	8.6519	5.06498e-18	1.83189e-17
YEL066W	YEL066W	YEL066W	CDS	HPA3	3380.75	3452.5	-0.0294182	0.0491805	-0.598169	0.549727	0.627643
YPR035W	YPR035W	YPR035W	CDS	GLN1	25839.5	27311.6	-0.0799362	0.030483	-2.62232	0.00873336	0.0138875
YDR014W	YDR014W	YDR014W	CDS	RAD61	828.828	604.605	0.451304	0.0826921	5.45764	4.82499e-08	1.14462e-07
YDR227W	YDR227W	YDR227W	CDS	SIR4	3437.35	3085.41	0.156014	0.0514027	3.03513	0.00240429	0.00406084
YPR060C	YPR060C	YPR060C	CDS	ARO7	315.921	448.017	-0.508628	0.122755	-4.14343	3.42153e-05	6.75027e-05
YDL133C-A	YDL133C-A	YDL133C-A	CDS	RPL41B	1152.04	2360.17	-1.03494	0.169872	-6.09248	1.11174e-09	2.87251e-09
YCR038C	YCR038C	YCR038C	CDS	BUD5	572.641	680.317	-0.248483	2.44988	-0.101427
YOR157C	YOR157C	YOR157C	CDS	PUP1	4040.79	3241.89	0.318387	0.0476747	6.67831	2.41705e-11	6.77667e-11
YNL257C	YNL257C	YNL257C	CDS	SIP3	2561.05	2050.26	0.319768	0.059867	5.34131	9.22798e-08	2.1533e-07
YDL148C	YDL148C	YDL148C	CDS	NOP14	641.506	2198.27	-1.7742	0.0680248	-26.0816	5.8909e-150	1.55253e-148
YDL150W	YDL150W	YDL150W	CDS	RPC53	625.861	1337.96	-1.09903	0.0725898	-15.1402	8.78893e-52	7.196e-51
YDL151C	YDL151C	YDL151C	CDS	BUD30	2.49403	0	3.71686	1.91323	1.94272	0.0520504	0.0749175
YNL092W	YNL092W	YNL092W	CDS	YNL092W	495.541	540.817	-0.127501	0.0905268	-1.40844	0.159002	0.208775
YGR045C	YGR045C	YGR045C	CDS	YGR045C	161.465	111.076	0.548019	0.175291	3.12633	0.00177003	0.00302987
YDL154W	YDL154W	YDL154W	CDS	MSH5	1144.12	497.295	1.20328	0.0777355	15.4791	4.80008e-54	4.09326e-53
YLR134W	YLR134W	YLR134W	CDS	PDC5	503.495	652.727	-0.370679	0.0885936	-4.18404	2.86372e-05	5.67624e-05
YLR161W	YLR161W	YLR161W	CDS	YLR161W	20.6028	12.2235	0.744225	0.539473	1.37954	0.167728	0.21912
YDL157C	YDL157C	YDL157C	CDS	YDL157C	790.829	1608.07	-1.02656	0.0712383	-14.4102	4.46375e-47	3.35213e-46
YPL225W	YPL225W	YPL225W	CDS	YPL225W	5782.32	7651.88	-0.404455	0.0457737	-8.83596	9.92403e-19	3.66716e-18
YPL270W	YPL270W	YPL270W	CDS	MDL2	6020.29	5175.36	0.218154	0.0454733	4.79741	1.60728e-06	3.47315e-06
YDL012C	YDL012C	YDL012C	CDS	YDL012C	1392.19	1554.36	-0.159382	0.0667803	-2.38666	0.0170022	0.0261434
YDR218C	YDR218C	YDR218C	CDS	SPR28	57.0377	44.4701	0.36317	0.285624	1.2715	0.203551	0.260653
YLR299W	YLR299W	YLR299W	CDS	ECM38	6397.61	4331.03	0.563026	0.0399833	14.0815	4.93221e-45	3.51855e-44
YDL159C-B	YDL159C-B	YDL159C-B	CDS	YDL159C-B	0.761589	2.86064	-1.98475	1.47296	-1.34746	0.177832	0.231065
YEL049W	YEL049W	YEL049W	CDS	PAU2	472.294	442.68	0.0944214	0.0953837	0.989911	0.322218	0.394179
YGL139W	YGL139W	YGL139W	CDS	FLC3	1798.26	1568.45	0.198254	0.0583131	3.39982	0.000674291	0.00119191
YNL054W	YNL054W	YNL054W	CDS	VAC7	1423.81	1632.66	-0.194843	0.0715322	-2.72384	0.00645271	0.0104126
YDR156W	YDR156W	YDR156W	CDS	RPA14	1005.99	1407.75	-0.485415	0.0847526	-5.72744	1.01956e-08	2.5011e-08
YDL159W-A	YDL159W-A	YDL159W-A	CDS	YDL159W-A	5.03156	0.697179	2.85888	1.44049	1.98465	0.047183	0.0684658
YPR155C	YPR155C	YPR155C	CDS	NCA2	2276.36	2231.8	0.0280339	0.0521776	0.537279	0.591075	0.666032
YOR137C	YOR137C	YOR137C	CDS	SIA1	904.433	781.732	0.208741	0.0693363	3.01057	0.00260762	0.00438939
YKL123W	YKL123W	YKL123W	CDS	YKL123W	114.281	153.731	-0.427767	0.161512	-2.64852	0.00808459	0.0128999
YDL163W	YDL163W	YDL163W	CDS	YDL163W	1.06887	3.43241	-1.70225	1.51224	-1.12565	0.260313	0.324705
YNL336W	YNL336W	YNL336W	CDS	COS1	901.803	1794.43	-0.991968	0.0638683	-15.5315	2.12462e-54	1.82289e-53
YDR305C	YDR305C	YDR305C	CDS	HNT2	1151.23	1085.13	0.0832766	0.0825044	1.00936	0.312803	0.384074
YDL166C	YDL166C	YDL166C	CDS	FAP7	516.161	1144.88	-1.14942	0.0709309	-16.2047	4.66873e-59	4.31301e-58
YPR100W	YPR100W	YPR100W	CDS	MRPL51	3515.01	3745.71	-0.0919741	0.0499028	-1.84306	0.0653195	0.0926089
YDR358W	YDR358W	YDR358W	CDS	GGA1	4894.58	3601.97	0.441723	0.0432741	10.2076	1.83423e-24	8.19068e-24
YJL152W	YJL152W	YJL152W	CDS	YJL152W	49.6471	40.4924	0.291187	0.300677	0.968439	0.332825	0.405805
YLR096W	YLR096W	YLR096W	CDS	KIN2	1870.21	1866.42	0.00297519	0.0582224	0.0511005	0.959245	0.976727
YIL104C	YIL104C	YIL104C	CDS	SHQ1	405.024	547.236	-0.439661	0.0972626	-4.52035	6.17364e-06	1.28133e-05
YKR052C	YKR052C	YKR052C	CDS	MRS4	1504	1372.55	0.134188	0.0586094	2.28954	0.0220481	0.0335039
YER040W	YER040W	YER040W	CDS	GLN3	1475.4	1371.15	0.10759	0.0563054	1.91083	0.0560266	0.0803304
YDL152W	YDL152W	YDL152W	CDS	YDL152W	3.15485	4.47818	-0.508096	1.16877	-0.434729	0.663759	0.731297
YDL185C-A	YDL185C-A	YDL185C-A	CDS	YDL185C-A	32.188	1.96613	3.99287	0.730102	5.46892	4.52794e-08	1.07489e-07
YDR225W	YDR225W	YDR225W	CDS	HTA1	15977.8	17406.5	-0.123506	0.0379542	-3.25409	0.00113757	0.00197485
YMR127C	YMR127C	YMR127C	CDS	SAS2	252.691	429.248	-0.762285	0.108483	-7.0268	2.11329e-12	6.20919e-12
YDL191W	YDL191W	YDL191W	CDS	RPL35A	491.077	1507.58	-1.61777	0.0705853	-22.9194	2.97882e-116	5.65328e-115
YOL163W	YOL163W	YOL163W	CDS	YOL163W	146.303	164.785	-0.171941	0.163115	-1.05411	0.291833	0.360737
YDL208W	YDL208W	YDL208W	CDS	NHP2	1603.9	3491.29	-1.12123	0.0524495	-21.3774	2.17021e-101	3.5413e-100
YBR213W	YBR213W	YBR213W	CDS	MET8	338.826	329.508	0.0411208	0.111367	0.369237	0.711951	0.774135
YAL064W	YAL064W	YAL064W	CDS	YAL064W	5.86887	8.57212	-0.54368	0.580984	-0.935792	0.34938	0.423183
YJL204C	YJL204C	YJL204C	CDS	RCY1	1101.71	828.355	0.410659	0.0805201	5.10009	3.395e-07	7.63137e-07
YLR244C	YLR244C	YLR244C	CDS	MAP1	3559.49	5238.34	-0.55758	0.047104	-11.8372	2.5064e-32	1.36969e-31
YLR255C	YLR255C	YLR255C	CDS	YLR255C	60.5538	55.8649	0.116569	0.221121	0.527171	0.598075	0.672139
YJR084W	YJR084W	YJR084W	CDS	YJR084W	1437.55	1268.54	0.180579	0.0663479	2.7217	0.00649465	0.0104754
YLR233C	YLR233C	YLR233C	CDS	EST1	588.219	808.722	-0.458129	0.0782539	-5.8544	4.78737e-09	1.19582e-08
YDL238C	YDL238C	YDL238C	CDS	GUD1	2147.35	1167.54	0.880251	0.0565322	15.5708	1.14953e-54	9.91612e-54
YGL084C	YGL084C	YGL084C	CDS	GUP1	2608.54	2136.7	0.288216	0.0540324	5.33413	9.60039e-08	2.23721e-07
YML084W	YML084W	YML084W	CDS	YML084W	10.4651	13.6104	-0.388787	0.514963	-0.75498	0.450261	0.529041
YLR382C	YLR382C	YLR382C	CDS	NAM2	1905.92	2022.89	-0.0876074	0.0512159	-1.71055	0.0871642	0.120977
YLR154C-H	YLR154C-H	YLR154C-H	CDS	YLR154C-H	0.356291	0.679352	-0.871172	2.10044	-0.414756	0.67832	0.743937
YLR154C-G	YLR154C-G	YLR154C-G	CDS	YLR154C-G	2.08322	2.05588	0.0175413	1.20143	0.0146004	0.988351	0.998935
YLR219W	YLR219W	YLR219W	CDS	MSC3	7049.35	4558.1	0.629456	0.0450091	13.9851	1.92263e-44	1.3577e-43
YDR261W-A	YDR261W-A	YDR261W-A	CDS	YDR261W-A	21.4413	18.6063	0.197998	0.420888	0.470428	0.638049	0.708786
YDR363W	YDR363W	YDR363W	CDS	ESC2	1068	1187.31	-0.153937	0.0776633	-1.9821	0.0474678	0.0688647
YNL114C	YNL114C	YNL114C	CDS	YNL114C	33.7368	41.5222	-0.306975	0.287174	-1.06895	0.285091	0.352778
YNL163C	YNL163C	YNL163C	CDS	RIA1	1306.18	2213.2	-0.760243	0.0507563	-14.9783	1.01804e-50	8.16303e-50
snR55	snR55	snR55	noncoding_exon	SNR55	19.5323	20.5071	-0.0566689	0.414411	-0.136746	0.891232	0.920764
snR54	snR54	snR54	noncoding_exon	SNR54	8.76269	10.7534	-0.297071	0.582847	-0.50969	0.610269	0.68336
YFR005C	YFR005C	YFR005C	CDS	SAD1	542.71	492.162	0.145135	0.0964304	1.50508	0.132304	0.177116
snR56	snR56	snR56	noncoding_exon	SNR56	32.864	27.5011	0.253722	0.344773	0.735911	0.461785	0.54049
snR51	snR51	snR51	noncoding_exon	SNR51	143.077	108.943	0.395401	0.18667	2.11818	0.0341595	0.0505445
YDL211C	YDL211C	YDL211C	CDS	YDL211C	76.5084	195.775	-1.36148	0.172914	-7.8737	3.44291e-15	1.13154e-14
snR53	snR53	snR53	noncoding_exon	SNR53	1.47417	2.44627	-0.764371	1.3582	-0.562784	0.573582	0.64957
snR52	snR52	snR52	noncoding_exon	SNR52	8.96919	12.6881	-0.485365	0.606415	-0.800383	0.423489	0.501466
YDL213C	YDL213C	YDL213C	CDS	NOP6	1211.71	2865.92	-1.24162	0.0611308	-20.3109	1.03061e-91	1.52495e-90
snR58	snR58	snR58	noncoding_exon	SNR58	1.32163	2.16346	-0.665822	1.61062	-0.413396	0.679317	0.744912
YDL214C	YDL214C	YDL214C	CDS	PRR2	4789.36	1827.37	1.38939	0.0477512	29.0965	3.97437e-186	1.43819e-184
YNR069C	YNR069C	YNR069C	CDS	BSC5	1184.95	786.897	0.591672	0.0788969	7.49931	6.41561e-14	2.01469e-13
YGR126W	YGR126W	YGR126W	CDS	YGR126W	311.099	349.448	-0.170146	0.109092	-1.55965	0.118843	0.16075
YAR019C	YAR019C	YAR019C	CDS	CDC15	2132.17	1583.84	0.427907	0.0504364	8.48411	2.17383e-17	7.72228e-17
YDL219W	YDL219W	YDL219W	CDS	DTD1	139.498	410.302	-1.55227	0.139617	-11.118	1.02491e-28	5.16448e-28
YGL071W	YGL071W	YGL071W	CDS	AFT1	2170.63	1739.83	0.319679	0.0511142	6.25422	3.99519e-10	1.05372e-09
YGL257C	YGL257C	YGL257C	CDS	MNT2	1083.53	1425.43	-0.392886	0.0626408	-6.27205	3.56334e-10	9.42666e-10
YGR020C	YGR020C	YGR020C	CDS	VMA7	2500.25	3677.03	-0.557536	0.0564641	-9.87417	5.38784e-23	2.30145e-22
YOR093C	YOR093C	YOR093C	CDS	YOR093C	1616.1	1383.54	0.224181	0.056976	3.93465	8.3317e-05	0.000158898
YAL046C	YAL046C	YAL046C	CDS	AIM1	1199.5	1239.1	-0.0453036	0.0778359	-0.58204	0.56054	0.637903
YDR198C	YDR198C	YDR198C	CDS	RKM2	878.612	837.846	0.0669309	0.0731908	0.914472	0.360469	0.435029
YAL039C	YAL039C	YAL039C	CDS	CYC3	10967.3	8579.89	0.354709	0.0637267	5.5661	2.60499e-08	6.24983e-08
YDL185W	YDL185W	YDL185W	CDS	VMA1	25142.5	20613.3	0.286726	0.0418478	6.85165	7.30025e-12	2.10334e-11
YIL166C	YIL166C	YIL166C	CDS	YIL166C	324.134	271.668	0.251625	0.118892	2.11642	0.0343095	0.0507449
YLR403W	YLR403W	YLR403W	CDS	SFP1	1518.31	1287.42	0.238605	0.0666777	3.57849	0.00034559	0.000626746
YOL118C	YOL118C	YOL118C	CDS	YOL118C	38.0057	26.5052	0.521501	0.328262	1.58867	0.112135	0.152542
YDR286C	YDR286C	YDR286C	CDS	YDR286C	495.738	435.411	0.183828	0.116588	1.57673	0.114858	0.155851
YDL222C	YDL222C	YDL222C	CDS	FMP45	13607.2	6766.08	1.00839	0.0646018	15.6093	6.28914e-55	5.43606e-54
YPL128C	YPL128C	YPL128C	CDS	TBF1	543.418	639.406	-0.237328	0.0819113	-2.89737	0.00376303	0.0062233
YGR136W	YGR136W	YGR136W	CDS	LSB1	5517.1	4860.97	0.183522	0.0496426	3.69687	0.00021827	0.000401898
YJL091C	YJL091C	YJL091C	CDS	GWT1	803.622	969.378	-0.269757	0.0834898	-3.23102	0.0012335	0.0021366
YDL229W	YDL229W	YDL229W	CDS	SSB1	3678.02	13470.9	-1.87235	0.0365459	-51.2328	0	0
tS%28GCU%29F	tS%28GCU%29F	tS%28GCU%29F	noncoding_exon	tS%28GCU%29F	0	0
YDL242W	YDL242W	YDL242W	CDS	YDL242W	40.7552	18.8055	1.10927	0.391386	2.8342	0.00459406	0.0075299
YGL100W	YGL100W	YGL100W	CDS	SEH1	3253.32	2862.32	0.184257	0.0526986	3.49644	0.00047151	0.000845233
tS%28GCU%29O	tS%28GCU%29O	tS%28GCU%29O	noncoding_exon	tS%28GCU%29O	0	0
YGR047C	YGR047C	YGR047C	CDS	TFC4	1092.88	1239.58	-0.182047	0.0764347	-2.38174	0.0172313	0.026484
YDR485C	YDR485C	YDR485C	CDS	VPS72	5869.43	4839.69	0.27876	0.0567476	4.91228	9.00249e-07	1.97467e-06
YDR007W	YDR007W	YDR007W	CDS	TRP1	0	714.635	-11.8716	1.1847	-10.0207	1.23612e-23	5.40242e-23
YPR183W	YPR183W	YPR183W	CDS	DPM1	3861.72	6152.43	-0.671112	0.0562315	-11.9348	7.79305e-33	4.31615e-32
YDR008C	YDR008C	YDR008C	CDS	YDR008C	0	133.566	-9.45057	1.21387	-7.78551	6.94301e-15	2.25535e-14
YDR012W	YDR012W	YDR012W	CDS	RPL4B	2199.42	5019.25	-1.18947	0.0635885	-18.7058	4.43942e-78	5.45861e-77
YOR391C	YOR391C	YOR391C	CDS	HSP33	77.373	124.63	-0.691086	0.197132	-3.50571	0.000455398	0.000817399
YDR525W-A	YDR525W-A	YDR525W-A	CDS	SNA2	7547.68	4324.07	0.803804	0.0562046	14.3014	2.14428e-46	1.57639e-45
YBR089W	YBR089W	YBR089W	CDS	YBR089W	11.2473	11.7678	-0.0339615	0.689487	-0.0492562	0.960715	0.977687
YDR021W	YDR021W	YDR021W	CDS	FAL1	226.526	497.557	-1.13781	0.124122	-9.16686	4.87012e-20	1.88229e-19
YBR054W	YBR054W	YBR054W	CDS	YRO2	22485.7	16523.8	0.444545	0.0456924	9.72907	2.26653e-22	9.44476e-22
YLR020C	YLR020C	YLR020C	CDS	YEH2	1057.53	1218.96	-0.203025	0.0581175	-3.49336	0.000476989	0.000853957
YNL217W	YNL217W	YNL217W	CDS	YNL217W	2105.79	2944.47	-0.482677	0.048716	-9.90797	3.84383e-23	1.64999e-22
YER067W	YER067W	YER067W	CDS	RGI1	61842.2	34827.6	0.828351	0.0421886	19.6345	7.84734e-86	1.09175e-84
YLR154W-A	YLR154W-A	YLR154W-A	CDS	YLR154W-A	5.03101	6.88454	-0.454916	0.864939	-0.525952	0.598922	0.672487
YDR023W	YDR023W	YDR023W	CDS	SES1	4291.79	8743.66	-1.02683	0.0381882	-26.8886	2.9865e-159	8.44443e-158
YPL206C	YPL206C	YPL206C	CDS	PGC1	5548.89	5372.15	0.0478049	0.0420496	1.13687	0.255593	0.319731
YDL060W	YDL060W	YDL060W	CDS	TSR1	845.506	1628.1	-0.943436	0.0630029	-14.9745	1.07802e-50	8.63405e-50
YBR293W	YBR293W	YBR293W	CDS	VBA2	1341.48	988.164	0.441168	0.0742045	5.9453	2.75956e-09	6.97531e-09
YNR052C	YNR052C	YNR052C	CDS	POP2	1834.08	1787.67	0.0382538	0.0642429	0.595456	0.551539	0.629197
YHR032W	YHR032W	YHR032W	CDS	ERC1	1064.99	1508.57	-0.500111	0.0903905	-5.53278	3.15197e-08	7.53625e-08
YEL032W	YEL032W	YEL032W	CDS	MCM3	1197.95	1687.84	-0.49278	0.0655887	-7.51319	5.77044e-14	1.81535e-13
YOL076W	YOL076W	YOL076W	CDS	MDM20	470.599	644.57	-0.456757	0.100097	-4.56314	5.03949e-06	1.05314e-05
YDR136C	YDR136C	YDR136C	CDS	VPS61	8.76544	7.1415	0.282277	0.617179	0.457367	0.647407	0.71668
YDR024W	YDR024W	YDR024W	CDS	FYV1	14.0988	30.1171	-1.10981	0.419125	-2.64792	0.00809879	0.0129196
YJL136W-A	YJL136W-A	YJL136W-A	CDS	YJL136W-A	1.83046	1.76692	0.0392788	1.52562	0.025746	0.97946	0.991755
YML112W	YML112W	YML112W	CDS	CTK3	1595.82	1614.01	-0.017807	0.056516	-0.315079	0.752701	0.807011
YLR154W-C	YLR154W-C	YLR154W-C	CDS	TAR1	12.6213	8.68159	0.532273	0.619881	0.85867	0.390523	0.467182
YGL241W	YGL241W	YGL241W	CDS	KAP114	558.362	651.106	-0.225851	0.0887694	-2.54425	0.0109514	0.0172069
YDR025W	YDR025W	YDR025W	CDS	RPS11A	1820.37	6201.77	-1.7664	0.047013	-37.5727	0	0
YPR176C	YPR176C	YPR176C	CDS	BET2	1146.14	1319.22	-0.203032	0.0723395	-2.80665	0.00500593	0.00817047
YKL100C	YKL100C	YKL100C	CDS	YPF1	7335.62	5159.23	0.507535	0.0425469	11.9288	8.37539e-33	4.62767e-32
YJL036W	YJL036W	YJL036W	CDS	SNX4	4393.72	2894.7	0.60064	0.0517042	11.6168	3.38429e-31	1.80289e-30
YER009W	YER009W	YER009W	CDS	NTF2	2723.6	4891.6	-0.844882	0.0494716	-17.0781	2.15958e-65	2.21475e-64
YLR115W	YLR115W	YLR115W	CDS	CFT2	1893.71	1575.22	0.26735	0.0566933	4.71572	2.4086e-06	5.14267e-06
YLR140W	YLR140W	YLR140W	CDS	YLR140W	8.25606	9.51835	-0.20086	0.685828	-0.292872	0.76962	0.821116
YGL114W	YGL114W	YGL114W	CDS	YGL114W	3250.52	2770.18	0.230765	0.0503729	4.58113	4.62476e-06	9.68496e-06
YER167W	YER167W	YER167W	CDS	BCK2	4235.8	3012.57	0.49183	0.0433555	11.3441	7.93286e-30	4.10393e-29
YMR104C	YMR104C	YMR104C	CDS	YPK2	6531.29	7518.36	-0.202887	0.0399826	-5.07439	3.88741e-07	8.71299e-07
YDR034W-B	YDR034W-B	YDR034W-B	CDS	YDR034W-B	2720.43	1074.37	1.34069	0.076396	17.5492	6.03558e-69	6.55559e-68
YDL195W	YDL195W	YDL195W	CDS	SEC31	7048.08	8788.58	-0.318039	0.0420463	-7.564	3.9085e-14	1.23572e-13
YNL199C	YNL199C	YNL199C	CDS	GCR2	2154.22	2152.17	0.00182393	0.054476	0.0334813	0.973291	0.987573
YCR026C	YCR026C	YCR026C	CDS	NPP1	4470.19	3259.35	0.45652	0.0444588	10.2684	9.7835e-25	4.43688e-24
YBL052C	YBL052C	YBL052C	CDS	SAS3	1271.75	1228.35	0.0485203	0.0669021	0.725243	0.468303	0.547568
YJL125C	YJL125C	YJL125C	CDS	GCD14	989.135	1436.71	-0.53671	0.067041	-8.00569	1.18801e-15	3.98132e-15
YBR076W	YBR076W	YBR076W	CDS	ECM8	127.149	137.179	-0.112344	0.185244	-0.606467	0.544205	0.622356
YNL317W	YNL317W	YNL317W	CDS	PFS2	1330.22	1486.79	-0.159198	0.0697775	-2.28152	0.0225179	0.0341657
YLL019C	YLL019C	YLL019C	CDS	KNS1	12203.4	8407.82	0.537841	0.0463862	11.5948	4.37634e-31	2.32429e-30
YOR156C	YOR156C	YOR156C	CDS	NFI1	928.614	735.613	0.333515	0.0727983	4.58135	4.61973e-06	9.67733e-06
YDR037W	YDR037W	YDR037W	CDS	KRS1	2216.24	5513.49	-1.31298	0.0521489	-25.1776	7.05737e-140	1.68797e-138
YKR026C	YKR026C	YKR026C	CDS	GCN3	652.7	1209.31	-0.88721	0.0712909	-12.4449	1.49035e-35	8.73206e-35
YDR040C	YDR040C	YDR040C	CDS	ENA1	661.189	279.145	1.24762	0.115279	10.8226	2.69005e-27	1.31013e-26
YJR012C	YJR012C	YJR012C	CDS	YJR012C	811.917	725.786	0.1595	0.106703	1.4948	0.134967	0.180335
YDR042C	YDR042C	YDR042C	CDS	YDR042C	54.7422	121.906	-1.15387	0.198776	-5.80487	6.44163e-09	1.5959e-08
YCR044C	YCR044C	YCR044C	CDS	PER1	1574.8	961.149	0.71225	0.0749204	9.50676	1.96699e-21	7.9869e-21
YDL177C	YDL177C	YDL177C	CDS	YDL177C	469.958	588.108	-0.319371	0.0974385	-3.27767	0.00104668	0.00182249
YDR064W	YDR064W	YDR064W	CDS	RPS13	1649.37	6539.44	-1.98711	0.0456877	-43.4933	0	0
YNL073W	YNL073W	YNL073W	CDS	MSK1	3508.76	2381.55	0.559409	0.0473436	11.8159	3.22966e-32	1.75943e-31
YMR280C	YMR280C	YMR280C	CDS	CAT8	10728.9	6999.03	0.616381	0.0330941	18.6251	2.01157e-77	2.44327e-76
YBR172C	YBR172C	YBR172C	CDS	SMY2	5508.54	6477.53	-0.233518	0.0545211	-4.28308	1.84324e-05	3.68859e-05
YFL020C	YFL020C	YFL020C	CDS	PAU5	166.334	164.191	0.021047	0.149782	0.140518	0.888251	0.918227
YNL328C	YNL328C	YNL328C	CDS	MDJ2	121.927	160.944	-0.403893	0.169922	-2.37693	0.0174574	0.026802
YJL014W	YJL014W	YJL014W	CDS	CCT3	3065.93	3860.01	-0.331581	0.045173	-7.34025	2.13191e-13	6.53324e-13
YGR217W	YGR217W	YGR217W	CDS	CCH1	1533.07	1376.14	0.154447	0.0551633	2.79982	0.00511307	0.00832977
YOR174W	YOR174W	YOR174W	CDS	MED4	787.104	1079.24	-0.455829	0.0718266	-6.34624	2.20635e-10	5.89261e-10
YDR083W	YDR083W	YDR083W	CDS	RRP8	932.758	1899.18	-1.02471	0.0815306	-12.5684	3.1494e-36	1.87514e-35
YNL015W	YNL015W	YNL015W	CDS	PBI2	31802.5	32386.4	-0.0264105	0.0346441	-0.762338	0.445858	0.52431
YCR084C	YCR084C	YCR084C	CDS	TUP1	2161.97	4063.06	-0.908686	0.0484371	-18.7601	1.60048e-78	1.98539e-77
YHR178W	YHR178W	YHR178W	CDS	STB5	1173.37	816.43	0.523403	0.0713737	7.33327	2.24598e-13	6.86775e-13
YHL050W-A	YHL050W-A	YHL050W-A	CDS	YHL050W-A	0	0	0	4.40746	0	1	1
YDR087C	YDR087C	YDR087C	CDS	RRP1	159.605	751.958	-2.23354	0.117104	-19.0731	4.22191e-81	5.44018e-80
YLR283W	YLR283W	YLR283W	CDS	YLR283W	762.491	859.54	-0.172041	0.0806327	-2.13363	0.0328729	0.0487543
YPL170W	YPL170W	YPL170W	CDS	DAP1	2914.74	3255.49	-0.159333	0.0554684	-2.8725	0.00407238	0.00670948
YPR001W	YPR001W	YPR001W	CDS	CIT3	3629.26	2052.99	0.821404	0.0503716	16.3069	8.81918e-60	8.25646e-59
YDR204W	YDR204W	YDR204W	CDS	COQ4	6610.42	4337.07	0.607927	0.0402489	15.1042	1.51975e-51	1.24285e-50
YBR085C-A	YBR085C-A	YBR085C-A	CDS	YBR085C-A	12300.6	15738.7	-0.356058	0.0394175	-9.033	1.6703e-19	6.34332e-19
YDR251W	YDR251W	YDR251W	CDS	PAM1	5158.14	3801.41	0.440693	0.036758	11.989	4.05683e-33	2.26301e-32
YNL048W	YNL048W	YNL048W	CDS	ALG11	1798.94	1923.72	-0.0969481	0.0672215	-1.44222	0.149241	0.197442
YDR091C	YDR091C	YDR091C	CDS	RLI1	887.737	1918.22	-1.11148	0.0625436	-17.7713	1.17974e-70	1.31408e-69
YDR095C	YDR095C	YDR095C	CDS	YDR095C	0.380795	1.26896	-1.83105	1.64617	-1.11231	0.266005	0.331509
YPL028W	YPL028W	YPL028W	CDS	ERG10	4062.03	6526.77	-0.683613	0.0537478	-12.7189	4.64328e-37	2.81988e-36
YJR152W	YJR152W	YJR152W	CDS	DAL5	1274.65	980.356	0.377404	0.0692946	5.44636	5.14105e-08	1.21753e-07
YKL025C	YKL025C	YKL025C	CDS	PAN3	2523.04	1883.92	0.421781	0.0470719	8.96036	3.23612e-19	1.21773e-18
YDR097C	YDR097C	YDR097C	CDS	MSH6	857.53	1895.24	-1.1467	0.0700231	-16.3759	2.84041e-60	2.688e-59
YDR101C	YDR101C	YDR101C	CDS	ARX1	527.505	1793.39	-1.76982	0.0737179	-24.0079	2.29777e-127	4.80467e-126
YOL097C	YOL097C	YOL097C	CDS	WRS1	1033.18	1484.75	-0.520488	0.0726877	-7.16061	8.03188e-13	2.40337e-12
YNL122C	YNL122C	YNL122C	CDS	YNL122C	888.489	1086.91	-0.290557	0.0737042	-3.9422	8.07379e-05	0.000154148
YCL033C	YCL033C	YCL033C	CDS	MXR2	3112.06	2896.23	0.104549	0.0749045	1.39577	0.162785	0.21322
YNR020C	YNR020C	YNR020C	CDS	ATP23	538.008	909.928	-0.759936	0.0818997	-9.27886	1.71303e-20	6.75541e-20
YBR258C	YBR258C	YBR258C	CDS	SHG1	938.174	673.374	0.475744	0.0839297	5.66837	1.44164e-08	3.5045e-08
YNL146W	YNL146W	YNL146W	CDS	YNL146W	243.463	192.095	0.334505	0.141589	2.36251	0.0181518	0.0278192
YAL007C	YAL007C	YAL007C	CDS	ERP2	809.281	1500.2	-0.889803	0.059599	-14.9298	2.10785e-50	1.68051e-49
YLR262C-A	YLR262C-A	YLR262C-A	CDS	TMA7	3081.03	3769.25	-0.290941	0.0537209	-5.4158	6.10163e-08	1.43868e-07
YDR112W	YDR112W	YDR112W	CDS	IRC2	7.87306	3.93653	1.0389	0.787039	1.32001	0.186833	0.241324
YBR223C	YBR223C	YBR223C	CDS	TDP1	1108.3	914.542	0.27894	0.0762805	3.65676	0.000255422	0.000467593
YNL241C	YNL241C	YNL241C	CDS	ZWF1	25278.5	13483.5	0.907055	0.0398352	22.7702	9.05598e-115	1.6911e-113
YJL154C	YJL154C	YJL154C	CDS	VPS35	3957.68	3307.02	0.259034	0.0483315	5.35953	8.3437e-08	1.94956e-07
YDR113C	YDR113C	YDR113C	CDS	PDS1	505.545	1031.77	-1.03028	0.077448	-13.3028	2.22874e-40	1.45472e-39
YNL182C	YNL182C	YNL182C	CDS	IPI3	434.401	842.206	-0.95539	0.105774	-9.03239	1.67966e-19	6.3754e-19
YDR120C	YDR120C	YDR120C	CDS	TRM1	843.047	1735.71	-1.03961	0.0645064	-16.1164	1.95774e-58	1.7873e-57
YPL047W	YPL047W	YPL047W	CDS	SGF11	328.723	368.757	-0.169308	0.119054	-1.42211	0.154995	0.203942
YDR123C	YDR123C	YDR123C	CDS	INO2	423.104	937.938	-1.14964	0.0850838	-13.5119	1.33095e-41	8.94642e-41
YLR287C-A	YLR287C-A	YLR287C-A	CDS	RPS30A	10878.6	12126.6	-0.156958	0.0529625	-2.96357	0.00304097	0.0050821
RPR1	RPR1	RPR1	noncoding_exon	RPR1	2140.43	1342.33	0.674487	0.0885345	7.61835	2.56941e-14	8.179e-14
YBR176W	YBR176W	YBR176W	CDS	ECM31	602.501	731.807	-0.28261	0.0785373	-3.59842	0.000320159	0.000581684
YBL071C-B	YBL071C-B	YBL071C-B	CDS	YBL071C-B	0.989845	1.77307	-0.77888	1.44018	-0.540822	0.58863	0.663813
YER147C-A	YER147C-A	YER147C-A	CDS	YER147C-A	5.28653	4.82677	0.154935	0.946831	0.163635	0.870019	0.903257
YPL036W	YPL036W	YPL036W	CDS	PMA2	1604.89	1024.42	0.649459	0.0791025	8.21035	2.20552e-16	7.57665e-16
YGL238W	YGL238W	YGL238W	CDS	CSE1	2974.33	2336.47	0.347989	0.0497076	7.00072	2.5465e-12	7.44754e-12
YLR190W	YLR190W	YLR190W	CDS	MMR1	2191.04	3784.07	-0.788901	0.0516445	-15.2756	1.11195e-52	9.24508e-52
YNL128W	YNL128W	YNL128W	CDS	TEP1	119.053	156.934	-0.399795	0.15249	-2.62177	0.00874741	0.0139066
YDR322W	YDR322W	YDR322W	CDS	MRPL35	3845.13	3629.48	0.0829474	0.041595	1.99417	0.0461338	0.0671247
YKL191W	YKL191W	YKL191W	CDS	DPH2	1552.79	2096.67	-0.432467	0.0754014	-5.73553	9.72057e-09	2.38792e-08
[truncated: 5,175 more rows]

## Sheet: ulp2D 500G (Uba2C162S A414P) vs
genes	GeneVer	GeneID	GeneType	GeneName	mean_ulp2D500G.9	mean_WT	log2FoldChange	lfcSE	stat	pvalue	padj
[truncated: 7,114 more rows]

[truncated: 2 more sheets: Down-regulation, Up-regulation]
