# Supplementary material for: Auto-sumoylation of the Ubc9 E2 SUMO-conjugating Enzyme Extends Cellular Lifespan
Source: Research Square preprint supplement (doi:10.21203/rs.3.rs-4016606/v1), 2024-03-21
Supplement: Supplementary file 3 [file 8c3b8602d95ef1eb48d81e48.xlsx]

## Sheet: SMT3 peaks in WT
chr	start	end	width	length	abs_summit	pileup	(-)log10(pvalue)	fold_enrichment	(-)log10(qvalue)	annotation	geneStart	geneEnd	geneLength	geneStrand	geneId	transcriptId	distanceToTSS	Gene_Symbol	Description	gene_biotype	Protein_ID	locus_tag
chrXII	403791	404502	712	713	404170	275	11.2544	1.54412	9.97272	Promoter (<=1kb)	402794	404062	1269	2	850821	NM_001182017	0	ZRT2	low-affinity Zn(2+) transporter ZRT2	protein_coding	NP_013231.1	YLR130C
chrVII	20665	22266	1602	1603	20981	244	15.8877	1.76419	14.5568	Promoter (<=1kb)	20978	22108	1131	1	852637	NM_001181121	0	ZRT1	high-affinity Zn(2+) transporter ZRT1	protein_coding	NP_011259.1	YGL255W
chrXV	32872	33710	839	840	33072	120	4.22089	1.43687	2.99416	Promoter (<=1kb)	34658	35407	750	1	854011	NM_001183407	-948	ZPS1	Zps1p	protein_coding	NP_014488.1	YOL154W
chrXV	109788	111539	1752	1753	110151	348	50.5297	2.51307	48.9988	Promoter (<=1kb)	110297	110638	342	1	854040	NM_001183363	0	ZEO1	Zeo1p	protein_coding	NP_014532.1	YOL109W
chrXIV	6676	7321	646	647	7018	466	106.078	3.36277	104.384	Promoter (<=1kb)	371	6098	5728	2	855377	NM_001183177	-578	YRF1-6	Y' element ATP-dependent helicase protein 1 copy 6	protein_coding	NP_014060.1	YNL339C
chrIV	1236072	1238210	2139	2140	1236357	368	58.8677	2.65709	57.3078	Promoter (<=1kb)	1236558	1238004	1447	1	851988	NM_001180689	0	YRA1	RNA-binding protein YRA1	protein_coding	NP_010669.1	YDR381W
chrXIII	267406	268905	1500	1501	268133	926	378.202	5.79635	376.133	Promoter (<=1kb)	267174	267800	627	1	855012	NM_001182356	232	YPT7	Rab family GTPase YPT7	protein_coding	NP_013713.1	YML001W
chrXII	388374	388754	381	382	388541	256	13.2367	1.64336	11.9326	Promoter (<=1kb)	386511	388220	1710	2	850811	NM_001182007	-154	YPS1	aspartyl protease	protein_coding	NP_013221.1	YLR120C
chrXIII	872624	873080	457	458	872828	340	47.3314	2.45547	45.8135	Promoter (<=1kb)	870073	872625	2553	2	855348	NM_001182811	0	YME2	Yme2p	protein_coding	NP_014031.1	YMR302C
chrVII	959398	961573	2176	2177	959521	192	5.26694	1.38975	4.07434	Promoter (<=1kb)	959904	961103	1200	1	853149	NM_001181363	0	YHB1	flavohemoglobin	protein_coding	NP_011750.1	YGR234W
chrXV	79462	81586	2125	2126	79960	1492	958.047	10.7508	955.479	Promoter (<=1kb)	78352	79479	1128	2	853992	NM_001183382	0	YGK3	serine/threonine protein kinase YGK3	protein_coding	NP_014513.1	YOL128C
chrXII	636580	640346	3767	3768	637445	598	145.674	3.55362	143.901	Promoter (<=1kb)	636780	639914	3135	1	850951	NM_001182136	0	YEF3	translation elongation factor EF-3	protein_coding	NP_013350.1	YLR249W
chrVII	905005	906116	1112	1113	905678	398	72.2458	2.87311	70.642	Promoter (<=1kb)	905237	905683	447	1	853117	NM_001181332	0	YCH1	phosphatase YCH1	protein_coding	NP_011719.1	YGR203W
chrV	302352	307266	4915	4916	302867	161	13.851	1.92374	12.4579	Promoter (<=1kb)	302806	303195	390	1	856803	NM_001178963	0	VTC1	Vtc1p	protein_coding	NP_010995.1	YER072W
chrXII	804999	807132	2134	2135	805642	1452	810.42	8.67701	807.945	Promoter (<=1kb)	802653	805106	2454	2	851051	NM_001182226	0	VRP1	Vrp1p	protein_coding	NP_013441.1	YLR337C
chrVII	309917	312288	2372	2373	310736	2158	1703.79	15.5465	1700.81	Promoter (<=1kb)	308713	310173	1461	2	852774	NM_001180969	0	VPS73	putative sugar transporter	protein_coding	NP_011411.3	YGL104C
chrXIII	195650	196514	865	866	196161	1175	645.798	8.46812	643.449	Promoter (<=1kb)	194913	195755	843	2	854966	NM_001182399	0	VPS71	Vps71p	protein_coding	NP_013671.1	YML041C
chrX	390724	392083	1360	1361	391115	926	426.284	6.67513	424.161	Promoter (<=1kb)	388385	390853	2469	2	853423	NM_001181463	0	VPS53	Vps53p	protein_coding	NP_012505.1	YJL029C
chrXIV	34320	34764	445	446	34548	194	24.8775	2.31561	23.3851	Promoter (<=1kb)	34696	37422	2727	1	855395	NM_001183159	0	VNX1	Vnx1p	protein_coding	NP_014078.1	YNL321W
chrXII	1027827	1030147	2321	2322	1028441	1219	687.121	8.78496	684.736	Promoter (<=1kb)	1026856	1027893	1038	2	851168	NM_001182335	0	VMA6	H(+)-transporting V0 sector ATPase subunit d	protein_coding	NP_013552.3	YLR447C
chrM	49964	50623	660	661	50126	1087	104.35	2.09295	102.661	Promoter (1-2kb)	48901	50097	1197	1	854586	gene-Q0140	1063	VAR1	mitochondrial 37S ribosomal protein VAR1	protein_coding	NP_009320.1	Q0140
chrM	52133	53671	1539	1540	52340	1097	230.308	3.20753	228.414	Distal Intergenic	48901	50097	1197	1	854586	gene-Q0140	3232	VAR1	mitochondrial 37S ribosomal protein VAR1	protein_coding	NP_009320.1	Q0140
chrXIV	523384	524065	682	683	523620	523	49.5777	2.06478	48.0515	Promoter (2-3kb)	526086	529583	3498	1	855673	NM_001182893	-2021	VAC7	Vac7p	protein_coding	NP_014344.3	YNL054W
chrV	84917	87172	2256	2257	85393	529	141.274	3.81642	139.508	Promoter (<=1kb)	85045	85545	501	2	856676	NM_001178850	0	UTR5	Utr5p	protein_coding	NP_010879.1	YEL035C
chrV	77670	79419	1750	1751	78024	321	40.0637	2.31865	38.5785	Promoter (<=1kb)	78053	79456	1404	1	856671	NM_001178855	0	UTR2	Utr2p	protein_coding	NP_010874.3	YEL040W
chrIV	1358869	1361072	2204	2205	1359625	2453	1976.64	16.1962	1973.52	Promoter (<=1kb)	1357580	1358902	1323	2	852060	NM_001180757	0	UTP6	snoRNA-binding rRNA-processing protein UTP6	protein_coding	NP_010737.1	YDR449C
chrXI	518978	519548	571	572	519105	123	4.74978	1.47249	3.50925	Promoter (<=1kb)	519527	520624	1098	1	853916	NM_001179832	0	UTH1	SUN family protein UTH1	protein_coding	NP_012968.4	YKR042W
chrX	620353	620796	444	445	620603	305	34.3172	2.20344	32.8591	Promoter (<=1kb)	620754	622490	1737	1	853567	NM_001181761	0	URA8	CTP synthase URA8	protein_coding	NP_012637.4	YJR103W
chrX	165423	173694	8272	8273	165875	318	38.1902	2.27486	36.7149	Promoter (<=1kb)	165723	172367	6645	2	853311	NM_001181563	0	URA2	bifunctional carbamoylphosphate synthetase/aspartate transcarbamylase	protein_coding	NP_012405.2	YJL130C
chrXI	24792	26252	1461	1462	25046	345	49.321	2.49147	47.7949	Promoter (<=1kb)	25215	26159	945	1	853664	NM_001179781	0	URA1	dihydroorotate dehydrogenase	protein_coding	NP_012706.1	YKL216W
chrIV	1400673	1403412	2740	2741	1401457	2298	1873	16.5546	1869.93	Promoter (<=1kb)	1399706	1401214	1509	2	852081	NM_001180778	0	UGO1	Ugo1p	protein_coding	NP_010758.3	YDR470C
chrIV	155746	156273	528	529	156018	226	11.6268	1.63458	10.3401	Promoter (<=1kb)	156318	157904	1587	1	851384	NM_001180230	-45	UGA3	Uga3p	protein_coding	NP_010111.1	YDL170W
chrIV	1256544	1257652	1109	1110	1257078	1313	777.682	9.46183	775.23	Promoter (<=1kb)	1254937	1256847	1911	2	851998	NM_001180698	0	UBA2	E1 ubiquitin-activating protein UBA2	protein_coding	NP_010678.3	YDR390C
chrXIII	23629	26263	2635	2636	23901	370	50.917	2.445	49.3858	Promoter (<=1kb)	22048	23683	1636	2	854915	NM_001182487	0	TUB3	alpha-tubulin TUB3	protein_coding	NP_013582.1	YML124C
chrXII	231924	234968	3045	3046	232356	386	51.2605	2.40211	49.7278	Promoter (<=1kb)	231702	232013	312	2	850732	NM_001181930	0	TRX1	thioredoxin TRX1	protein_coding	NP_013144.1	YLR043C
chrXII	817948	820443	2496	2497	818669	2396	1931.07	16.1986	1927.97	Promoter (<=1kb)	818609	818680	72	1	851057	rna-tR(CCG)L	0	TRR4	tRNA-Arg	tRNA	.	tR(CCG)L
chrIV	1183008	1183466	459	460	1183116	171	2.5543	1.23854	1.42871	Promoter (<=1kb)	1183299	1184258	960	1	851955	NM_001180661	0	TRR1	thioredoxin-disulfide reductase TRR1	protein_coding	NP_010640.1	YDR353W
chrIV	1183757	1184199	443	444	1184066	190	4.96673	1.37535	3.78016	Promoter (<=1kb)	1183299	1184258	960	1	851955	NM_001180661	458	TRR1	thioredoxin-disulfide reductase TRR1	protein_coding	NP_010640.1	YDR353W
chrXI	38038	39164	1127	1128	38610	629	203.676	4.5365	201.816	Promoter (<=1kb)	36699	38153	1455	2	853669	NM_001179776	0	TRP3	bifunctional anthranilate synthase/indole-3-glycerol-phosphate synthase	protein_coding	NP_012711.1	YKL211C
chrI	138761	139574	814	815	139162	830	349.039	5.98385	347.005	Promoter (<=1kb)	139152	139254	103	1	851227	rna-tP(UGG)A	0	TRN1	tRNA-Pro	tRNA	.	tP(UGG)A
chrIV	555280	556955	1676	1677	555872	371	60.1595	2.67869	58.5951	Promoter (<=1kb)	555726	556472	747	2	851620	NM_001180358	0	TPI1	triose-phosphate isomerase TPI1	protein_coding	NP_010335.1	YDR050C
chrXII	521454	523738	2285	2286	522375	2270	1682.65	13.8176	1679.68	Promoter (<=1kb)	520543	522012	1470	2	850880	NM_001182070	0	TOS4	Tos4p	protein_coding	NP_013284.1	YLR183C
chrXI	334124	335236	1113	1114	334602	288	28.6065	2.08103	27.1792	Promoter (<=1kb)	334412	334915	504	2	853809	NM_001179622	0	TMA19	Tma19p	protein_coding	NP_012867.1	YKL056C
chrXVI	693864	695671	1808	1809	693951	170	2.4499	1.23133	1.3278	Promoter (<=1kb)	692796	694838	2043	2	856188	NM_001184171	0	TKL1	transketolase TKL1	protein_coding	NP_015399.1	YPR074C
chrV	116996	118761	1766	1767	118065	2653	2318.2	19.1109	2314.91	Promoter (<=1kb)	117211	117474	264	1	856693	NM_001184349	0	TIM9	protein transporter TIM9	protein_coding	NP_010894.1	YEL020W-A
chrXIV	661901	662679	779	780	662020	182	3.85288	1.31774	2.69103	Promoter (<=1kb)	662913	663581	669	1	855751	NM_001183194	-234	TIM23	protein transporter TIM23	protein_coding	NP_014414.3	YNR017W
chrVII	554728	556929	2202	2203	555492	1198	667.311	8.63374	664.943	Promoter (<=1kb)	554248	554967	720	2	852921	NM_001181162	0	TIM21	Tim21p	protein_coding	NP_011547.3	YGR033C
chrVIII	115407	116592	1186	1187	116163	1012	499.164	7.2944	496.96	Promoter (<=1kb)	115620	115901	282	2	856395	NM_001181427	0	TIM10	protein transporter TIM10	protein_coding	NP_011869.1	YHR005C-A
chrX	154584	154987	404	405	154744	281	26.3788	2.03062	24.9654	Promoter (<=1kb)	153504	154691	1188	2	853303	NM_001181571	0	TIF2	translation initiation factor eIF4A	protein_coding	NP_012397.1	YJL138C
chrIV	568382	569485	1104	1105	568932	1410	874.193	10.1603	871.679	Promoter (<=1kb)	567723	568703	981	2	851628	NM_001180366	0	TGL2	triglyceride lipase	protein_coding	NP_010343.1	YDR058C
chrI	165948	166802	855	856	166275	1156	628.172	8.33131	625.839	Promoter (<=1kb)	166267	166339	73	1	851270	rna-tA(UGC)A	0	TGA1	tRNA-Ala	tRNA	.	tA(UGC)A
chrI	151248	151951	704	705	151552	468	81.671	2.81192	80.0406	Promoter (<=1kb)	147594	151166	3573	2	851262	NM_001178148	-82	TFC3	transcription factor TFIIIC subunit TFC3	protein_coding	NP_009400.1	YAL001C
chrXI	558890	559705	816	817	559358	379	63.655	2.7363	62.0787	Promoter (<=1kb)	559666	560652	987	1	853936	NM_001179852	0	TFA2	transcription factor TFIIE subunit TFA2	protein_coding	NP_012988.1	YKR062W
chrXI	384897	385799	903	904	385399	387	128.657	4.60747	126.784	Promoter (<=1kb)	385758	387206	1449	1	853840	NM_001179594	0	TFA1	transcription factor TFIIE subunit TFA1	protein_coding	NP_012897.3	YKL028W
chrXII	167319	168431	1113	1114	168022	1295	728.829	8.77134	726.41	Promoter (<=1kb)	167320	167802	483	2	850696	NM_001181897	0	TEN1	Ten1p	protein_coding	NP_013110.1	YLR010C
chrXIII	145388	147478	2091	2092	146120	3305	3187.93	23.8058	3184.22	Promoter (<=1kb)	145139	145876	738	2	854938	NM_001182423	0	TEM1	Ras family GTPase TEM1	protein_coding	NP_013647.1	YML064C
chrXI	282460	284844	2385	2386	282884	284	27.3246	2.05222	25.9051	Promoter (<=1kb)	282891	284455	1565	1	853781	NM_001179647	0	TEF4	translation elongation factor EF1B gamma	protein_coding	NP_012842.1	YKL081W
chrII	476549	477878	1330	1331	477269	2402	2001.11	17.3035	1997.98	Promoter (<=1kb)	477671	479047	1377	1	852415	NM_001178466	0	TEF2	translation elongation factor EF-1 alpha	protein_coding	NP_009676.1	YBR118W
chrXVI	701829	702401	573	574	702052	375	61.898	2.7075	60.3276	Promoter (1-2kb)	700594	701970	1377	1	856195	NM_001184177	1235	TEF1	translation elongation factor EF-1 alpha	protein_coding	NP_015405.1	YPR080W
chrXVI	699601	700784	1184	1185	700210	887	393.772	6.38291	391.685	Promoter (<=1kb)	700594	701970	1377	1	856195	NM_001184177	0	TEF1	translation elongation factor EF-1 alpha	protein_coding	NP_015405.1	YPR080W
chrII	408596	408933	338	339	408747	219	10.1309	1.58417	8.86244	Promoter (<=1kb)	409169	410629	1461	1	852377	NM_001178431	-236	TEC1	Tec1p	protein_coding	NP_009639.3	YBR083W
chrVII	882179	884541	2363	2364	882788	506	128.027	3.6508	126.286	Promoter (<=1kb)	882812	883810	999	2	853106	NM_001181321	0	TDH3	glyceraldehyde-3-phosphate dehydrogenase (phosphorylating) TDH3	protein_coding	NP_011708.3	YGR192C
chrX	454269	455175	907	908	454734	417	74.4547	2.84608	72.8449	Promoter (<=1kb)	453683	454681	999	2	853465	NM_001181666	0	TDH2	glyceraldehyde-3-phosphate dehydrogenase (phosphorylating) TDH2	protein_coding	NP_012542.1	YJR009C
chrVIII	125476	127663	2188	2189	126139	1846	1341.28	13.2998	1338.48	Promoter (<=1kb)	124109	125680	1572	2	856400	NM_001179139	0	TDA3	Tda3p	protein_coding	NP_011873.1	YHR009C
chrV	302240	307398	5159	5160	302506	278	22.7831	1.92292	21.3947	Promoter (<=1kb)	301947	302327	381	2	856802	NM_001178962	0	TDA2	Tda2p	protein_coding	NP_010994.3	YER071C
chrXVI	308228	308639	412	413	308441	294	30.5742	2.12423	29.1357	Promoter (<=1kb)	306533	308221	1689	2	855975	NM_001183942	-7	TBF1	Tbf1p	protein_coding	NP_015197.1	YPL128C
chrXII	837101	840017	2917	2918	837261	216	6.58249	1.42801	5.36593	Promoter (<=1kb)	836350	837357	1008	2	851068	NM_001182243	0	TAL1	sedoheptulose-7-phosphate:D-glyceraldehyde-3-phosphate transaldolase TAL1	protein_coding	NP_013458.1	YLR354C
chrIV	1135458	1136333	876	877	1135888	410	77.8742	2.95952	76.2534	Promoter (<=1kb)	1135932	1140476	4545	1	851934	NM_001180642	0	SWR1	chromatin-remodeling protein SWR1	protein_coding	NP_010621.1	YDR334W
chrIV	750939	751293	355	356	751028	174	2.88128	1.26014	1.74537	Promoter (<=1kb)	748613	750742	2130	2	851724	NM_001180453	-197	SWI5	DNA-binding transcription factor SWI5	protein_coding	NP_010430.1	YDR146C
chrXIII	170276	170720	445	446	170378	194	5.57574	1.40415	4.37734	Promoter (<=1kb)	170402	171310	909	1	854953	NM_001182410	0	SUR7	Sur7p	protein_coding	NP_013660.1	YML052W
chrXIII	837449	838384	936	937	837933	1094	571.613	7.88486	569.337	Promoter (<=1kb)	837928	838016	89	1	855327	rna-tY(GUA)M2	0	SUP8	tRNA-Tyr	tRNA	.	tY(GUA)M2
chrX	354047	354515	469	470	354239	540	147.763	3.89563	145.986	Promoter (<=1kb)	354244	354332	89	1	853402	rna-tY(GUA)J1	0	SUP7	tRNA-Tyr	tRNA	.	tY(GUA)J1
chrIII	227557	228692	1136	1137	227971	1087	565.321	7.83446	563.052	Promoter (<=1kb)	227942	228042	101	1	850426	rna-tS(CGA)C	0	SUP61	tRNA-Ser	tRNA	.	tS(CGA)C
chrVI	210201	211066	866	867	210679	803	328.158	5.78943	326.149	Promoter (<=1kb)	210619	210707	89	2	850586	rna-tY(GUA)F2	0	SUP6	tRNA-Tyr	tRNA	.	tY(GUA)F2
chrI	180766	181613	848	849	181160	771	303.921	5.55901	301.94	Promoter (<=1kb)	181141	181254	114	1	851277	rna-tL(CAA)A	0	SUP56	tRNA-Leu	tRNA	.	tL(CAA)A
chrVII	422643	423606	964	965	423127	975	467.404	7.02797	465.235	Promoter (<=1kb)	423092	423205	114	1	852843	rna-tL(CAA)G2	0	SUP54	tRNA-Leu	tRNA	.	tL(CAA)G2
chrIII	90558	92660	2103	2104	90883	1527	994.44	11.0028	991.849	Promoter (<=1kb)	90859	90972	114	1	850341	rna-tL(CAA)C	0	SUP53	tRNA-Leu	tRNA	.	tL(CAA)C
chrXIII	168490	169269	780	781	168816	953	448.806	6.86955	446.659	Promoter (<=1kb)	168795	168883	89	1	854951	rna-tY(GUA)M1	0	SUP5	tRNA-Tyr	tRNA	.	tY(GUA)M1
chrX	542531	543413	883	884	543020	932	431.26	6.71833	429.131	Promoter (<=1kb)	542956	543044	89	2	853519	rna-tY(GUA)J2	0	SUP4	tRNA-Tyr	tRNA	.	tY(GUA)J2
chrIV	945820	946840	1021	1022	946352	1001	489.66	7.21519	487.467	Promoter (<=1kb)	946312	946400	89	1	851828	rna-tY(GUA)D	0	SUP2	tRNA-Tyr	tRNA	.	tY(GUA)D
chrV	287086	289056	1971	1972	287544	642	212.319	4.63011	210.448	Promoter (<=1kb)	288443	288524	82	2	856795	rna-tS(UGA)E	0	SUP19	tRNA-Ser	tRNA	.	tS(UGA)E
chrXVI	689159	690076	918	919	689588	1090	568.016	7.85606	565.743	Promoter (<=1kb)	689565	689646	82	1	856185	rna-tS(UGA)P	0	SUP16	tRNA-Ser	tRNA	.	tS(UGA)P
chrXIV	501922	502310	389	390	501995	109	2.5453	1.30624	1.37656	Promoter (<=1kb)	501515	502777	1263	1	855659	NM_001182904	407	SUN4	putative glucosidase SUN4	protein_coding	NP_014333.1	YNL066W
chrVI	101014	101815	802	803	101409	769	302.425	5.54461	300.446	Promoter (<=1kb)	101376	101478	103	1	850526	rna-tP(UGG)F	0	SUF9	tRNA-Pro	tRNA	.	tP(UGG)F
chrXIV	95834	96533	700	701	96329	659	223.792	4.75252	221.907	Promoter (<=1kb)	96241	96312	72	2	855432	rna-tG(UCC)N	0	SUF6	tRNA-Gly	tRNA	.	tG(UCC)N
chrXV	593648	594972	1325	1326	594409	2970	2733.3	21.3935	2729.81	Promoter (<=1kb)	594354	594425	72	2	854311	rna-tG(CCC)O	0	SUF5	tRNA-Gly	tRNA	.	tG(CCC)O
chrVII	779154	780160	1007	1008	779630	1143	616.191	8.2377	613.869	Promoter (<=1kb)	779616	779687	72	1	853046	rna-tG(UCC)G	0	SUF4	tRNA-Gly	tRNA	.	tG(UCC)G
chrX	531424	532252	829	830	531845	996	485.357	7.17918	483.169	Promoter (<=1kb)	531828	531898	71	1	853511	rna-tG(GCC)J2	0	SUF23	tRNA-Gly	tRNA	.	tG(GCC)J2
chrVI	161819	162655	837	838	162238	1117	592.422	8.05048	590.123	Promoter (<=1kb)	162228	162298	71	1	850560	rna-tG(GCC)F1	0	SUF20	tRNA-Gly	tRNA	.	tG(GCC)F1
chrIII	124869	125456	588	589	124973	182	3.85288	1.31774	2.69103	Promoter (1-2kb)	123577	123648	72	2	850363	rna-tP(AGG)C	-1221	SUF2	tRNA-Pro	tRNA	.	tP(AGG)C
chrIII	123039	124209	1171	1172	123656	1524	991.307	10.9812	988.718	Promoter (<=1kb)	123577	123648	72	2	850363	rna-tP(AGG)C	0	SUF2	tRNA-Pro	tRNA	.	tP(AGG)C
chrXV	281655	282758	1104	1105	282172	1031	515.704	7.43121	513.483	Promoter (<=1kb)	282164	282234	71	1	854137	rna-tG(GCC)O2	0	SUF17	tRNA-Gly	tRNA	.	tG(GCC)O2
chrIII	142175	143193	1019	1020	142761	973	465.704	7.01357	463.538	Promoter (<=1kb)	142701	142771	71	2	850374	rna-tG(GCC)C	0	SUF16	tRNA-Gly	tRNA	.	tG(GCC)C
chrXIV	631278	633208	1931	1932	631899	1490	955.978	10.7364	953.411	Promoter (<=1kb)	631846	631917	72	2	855734	rna-tP(AGG)N	0	SUF10	tRNA-Pro	tRNA	.	tP(AGG)N
chrXII	439962	441526	1565	1566	440127	253	7.3114	1.41928	6.08334	Promoter (<=1kb)	440467	441288	822	1	850843	NM_001182037	0	STM1	Stm1p	protein_coding	NP_013251.1	YLR150W
chrIV	228735	230989	2255	2256	229673	1571	1040.68	11.3196	1038.07	Promoter (<=1kb)	229171	229431	261	1	851426	NM_001184325	0	STF1	ATPase-binding protein	protein_coding	NP_010152.1	YDL130W-A
chrXI	46112	47219	1108	1109	46798	1007	494.837	7.25839	492.639	Promoter (<=1kb)	42423	46295	3873	2	853671	NM_001179774	0	STE6	ATP-binding cassette a-factor transporter STE6	protein_coding	NP_012713.1	YKL209C
chrVI	82112	84334	2223	2224	82538	436	90.5835	3.14674	88.9279	Promoter (<=1kb)	82580	83875	1296	1	850518	NM_001179940	0	STE2	alpha-factor pheromone receptor STE2	protein_coding	NP_116627.2	YFL026W
chrVIII	273609	273956	348	349	273745	117	3.72237	1.40124	2.51036	Promoter (<=1kb)	274174	276240	2067	1	856484	NM_001179214	-218	STE12	homeodomain family transcription factor STE12	protein_coding	NP_011952.1	YHR084W
chrVIII	227160	227591	432	433	227365	273	23.9242	1.97302	22.5275	Promoter (<=1kb)	225525	227141	1617	2	856461	NM_001179194	-19	SSZ1	Ssz1p	protein_coding	NP_011931.2	YHR064C
chrIX	299856	300684	829	830	300267	924	424.629	6.66073	422.508	Promoter (<=1kb)	296050	300009	3960	2	854781	NM_001179380	0	SSM4	E3 ubiquitin-protein ligase SSM4	protein_coding	NP_012234.3	YIL030C
chrIV	1086600	1087932	1333	1334	1087216	1387	851.04	9.99469	848.54	Promoter (<=1kb)	1087581	1088942	1362	1	851907	NM_001180620	0	SSF2	rRNA-binding ribosome biosynthesis protein	protein_coding	NP_010598.3	YDR312W
chrXIV	252014	252568	555	556	252309	257	19.3184	1.8578	17.9567	Promoter (<=1kb)	252059	253900	1842	1	855512	NM_001183047	0	SSB2	Hsp70 family ATPase SSB2	protein_coding	NP_014190.1	YNL209W
chrIV	45269	46181	913	914	45399	223	10.9743	1.61298	9.69532	Promoter (1-2kb)	44065	45906	1842	1	851369	NM_001180289	1204	SSB1	Hsp70 family ATPase SSB1	protein_coding	NP_010052.1	YDL229W
chrIV	43749	44548	800	801	44267	311	36.4308	2.24665	34.9626	Promoter (<=1kb)	44065	45906	1842	1	851369	NM_001180289	0	SSB1	Hsp70 family ATPase SSB1	protein_coding	NP_010052.1	YDL229W
chrXII	252965	253772	808	809	253421	380	63.2328	2.7213	61.6579	Promoter (<=1kb)	251272	253080	1809	2	850744	NM_001181942	0	SPT8	SAGA complex subunit SPT8	protein_coding	NP_013156.1	YLR055C
chrVII	185274	186245	972	973	185758	1078	557.261	7.76965	555	Promoter (<=1kb)	184153	185394	1242	2	852705	NM_001181035	0	SPO74	Spo74p	protein_coding	NP_011345.3	YGL170C
chrXVI	644685	645174	490	491	644774	170	2.4499	1.23133	1.3278	Promoter (<=1kb)	645950	646153	204	1	856149	NM_001184516	-776	SPO24	Spo24p	protein_coding	NP_690847.1	YPR036W-A
chrXVI	645577	646170	594	595	645934	235	13.6843	1.69939	12.3753	Promoter (<=1kb)	645950	646153	204	1	856149	NM_001184516	0	SPO24	Spo24p	protein_coding	NP_690847.1	YPR036W-A
chrVIII	401035	401359	325	326	401196	270	23.0294	1.95141	21.6389	Promoter (<=1kb)	401434	401955	522	1	856557	NM_001179283	-75	SPO12	Spo12p	protein_coding	NP_012022.1	YHR152W
chrX	72910	76789	3880	3881	73599	2135	1665.12	15.1844	1662.16	Promoter (<=1kb)	72710	73414	705	2	853247	NM_001181625	0	SOP4	Sop4p	protein_coding	NP_012343.1	YJL192C
chrVII	328349	329096	748	749	328621	990	480.207	7.13598	478.025	Promoter (<=1kb)	328583	328654	72	1	852784	rna-tE(UUC)G1	0	SOE1	tRNA-Glu	tRNA	.	tE(UUC)G1
chrV	101139	102517	1379	1380	101231	174	2.88128	1.26014	1.74537	Promoter (<=1kb)	101943	102323	381	1	856687	NM_001178841	0	SNU13	RNA binding protein SNU13	protein_coding	NP_010888.1	YEL026W
chrIX	245655	245945	291	292	245806	226	11.6268	1.63458	10.3401	Promoter (<=1kb)	244657	245559	903	2	854749	NM_001179411	-96	SNP1	U1 snRNP complex subunit SNP1	protein_coding	NP_012203.1	YIL061C
chrXII	194093	194532	440	441	194348	166	15.3503	1.98311	13.9409	Promoter (<=1kb)	194452	195174	723	1	850712	NM_001181912	0	SNF7	ESCRT-III subunit protein SNF7	protein_coding	NP_013125.1	YLR025W
chrXVI	899896	900188	293	294	900029	196	5.89299	1.41855	4.68865	Promoter (<=1kb)	900194	900454	261	1	856312	NM_001184279	-6	SMX3	mRNA splicing protein SMX3	protein_coding	NP_015508.1	YPR182W
chrXIV	654387	658352	3966	3967	654564	255	18.7721	1.8434	17.4149	Promoter (<=1kb)	653387	654541	1155	1	855749	NM_001183192	1000	SMM1	tRNA-dihydrouridine(20) synthase (NAD(+))	protein_coding	NP_014412.1	YNR015W
chrXIII	158893	159842	950	951	159407	322	40.4344	2.32585	38.9475	Promoter (<=1kb)	159383	159697	315	1	854945	NM_001182417	0	SML1	ribonucleotide reductase inhibiting protein SML1	protein_coding	NP_013653.1	YML058W
chrV	395408	397887	2480	2481	396431	3456	3397.77	24.8931	3393.99	Promoter (<=1kb)	395348	396172	825	2	856852	NM_001179006	0	SLX8	SUMO-targeted ubiquitin ligase complex subunit SLX8	protein_coding	NP_011041.3	YER116C
chrIV	619572	620476	905	906	620026	1052	534.159	7.58243	531.92	Promoter (<=1kb)	618497	619645	1149	2	851661	NM_001180396	0	SLU7	mRNA splicing protein SLU7	protein_coding	NP_010373.3	YDR088C
chrV	550874	551725	852	853	551337	825	345.143	5.94785	343.114	Promoter (<=1kb)	550865	551122	258	2	856928	NM_001184517	0	SLO1	Slo1p	protein_coding	NP_796378.3	YER180C-A
chrXI	642620	642891	272	273	642767	138	7.83014	1.65061	6.52434	Promoter (2-3kb)	640540	642504	1965	1	853976	NM_001179891	2080	SIR1	Sir1p	protein_coding	NP_013027.4	YKR101W
chrIV	601655	602046	392	393	601736	182	3.85288	1.31774	2.69103	Promoter (<=1kb)	602198	602869	672	2	851650	NM_001180386	823	SHU2	Shu2p	protein_coding	NP_010363.1	YDR078C
chrXI	520488	521023	536	537	520640	127	5.50118	1.51999	4.24257	Promoter (<=1kb)	520897	521712	816	2	853917	NM_001179833	689	SHB17	sedoheptulose-bisphosphatase	protein_coding	NP_012969.1	YKR043C
chrXV	339835	340802	968	969	340351	973	465.704	7.01357	463.538	Promoter (<=1kb)	338938	339978	1041	2	854168	NM_001183426	0	SGT2	Sgt2p	protein_coding	NP_014649.1	YOR007C
chrIX	355488	356076	589	590	355798	284	27.3246	2.05222	25.9051	Promoter (<=1kb)	356143	356895	753	2	854817	NM_001179523	819	SGN1	Sgn1p	protein_coding	NP_012266.1	YIR001C
chrXV	903942	904292	351	352	904084	218	9.92485	1.57697	8.65893	Promoter (<=1kb)	904760	905800	1041	1	854493	NM_001183735	-468	SFG1	Sfg1p	protein_coding	NP_014960.1	YOR315W
chrV	321893	323206	1314	1315	322281	224	11.1899	1.62018	9.9084	Promoter (<=1kb)	322686	324095	1410	1	856814	NM_001178972	0	SER3	phosphoglycerate dehydrogenase SER3	protein_coding	NP_011004.3	YER081W
chrXII	348176	352229	4054	4055	348590	412	60.3234	2.53332	58.7588	Promoter (<=1kb)	347047	348180	1134	2	850795	NM_001181992	0	SEN2	tRNA splicing endonuclease subunit SEN2	protein_coding	NP_013206.1	YLR105C
chrIV	600507	600919	413	414	600746	237	14.1615	1.71379	12.8476	Promoter (<=1kb)	600793	601809	1017	1	851649	NM_001180385	0	SED1	Sed1p	protein_coding	NP_010362.3	YDR077W
chrIV	802209	803186	978	979	802783	1258	724.326	9.06579	721.911	Promoter (<=1kb)	796193	802222	6030	2	851748	NM_001180477	0	SEC7	Arf family guanine nucleotide exchange factor SEC7	protein_coding	NP_010454.3	YDR170C
chrXIII	296640	298955	2316	2317	297091	647	215.673	4.66611	213.798	Promoter (<=1kb)	295179	296738	1560	2	855026	NM_001182509	0	SEC59	dolichol kinase	protein_coding	NP_013726.1	YMR013C
chrIV	1446900	1447848	949	950	1447411	511	130.869	3.6868	129.122	Promoter (<=1kb)	1445843	1446994	1152	2	852109	NM_001180806	0	SEC20	Sec20p	protein_coding	NP_010786.3	YDR498C
chrXII	497867	500199	2333	2334	498684	2823	2294.63	16.496	2291.35	Promoter (<=1kb)	495429	498044	2616	2	850863	NM_001182053	0	SEC10	exocyst subunit SEC10	protein_coding	NP_013267.1	YLR166C
chrIV	212343	212836	494	495	212688	213	8.92346	1.54097	7.67064	Promoter (<=1kb)	211375	212046	672	2	851416	NM_001180199	-297	SCM3	Scm3p	protein_coding	NP_010142.2	YDL139C
chrIV	1452984	1454780	1797	1798	1453122	183	3.98443	1.32494	2.81943	Promoter (<=1kb)	1453310	1454464	1155	2	852113	NM_001180810	0	SAM2	methionine adenosyltransferase SAM2	protein_coding	NP_010790.3	YDR502C
chrV	235993	237349	1357	1358	236237	210	8.34621	1.51937	7.1016	Promoter (<=1kb)	235770	237119	1350	2	856766	NM_001178934	0	SAH1	adenosylhomocysteinase	protein_coding	NP_010961.3	YER043C
chrIV	321068	323785	2718	2719	321869	1964	1475.88	14.1495	1473.01	Promoter (<=1kb)	320668	321552	885	2	851483	NM_001180135	0	RXT3	Rxt3p	protein_coding	NP_010207.1	YDL076C
chrIV	841947	842216	270	271	842155	126	5.10569	1.49277	3.85985	Promoter (<=1kb)	840604	841995	1392	2	851771	NM_001180498	0	RVB1	RuvB family ATP-dependent DNA helicase pontin	protein_coding	NP_010476.1	YDR190C
chrIV	929269	931128	1860	1861	929573	200	6.55277	1.44736	5.33629	Promoter (<=1kb)	929470	930357	888	2	851819	NM_001180541	0	RTN1	Rtn1p	protein_coding	NP_010519.3	YDR233C
chrVII	921455	921849	395	396	921532	110	2.68009	1.31812	1.50556	Promoter (<=1kb)	922175	922507	333	1	853129	NM_001181344	-326	RSM27	mitochondrial 37S ribosomal protein RSM27	protein_coding	NP_011731.3	YGR215W
chrXII	490486	490757	272	273	490620	207	6.64155	1.44232	5.42484	Promoter (<=1kb)	490406	490594	189	1	1466416	NM_001184566	80	RRT15	Rrt15p	protein_coding	NP_878128.1	YLR162W-A
chrXV	326329	326928	600	601	326593	340	39.4363	2.24075	37.9544	Promoter (<=1kb)	326832	329033	2202	1	854162	NM_001183420	0	RRP6	exosome nuclease subunit RRP6	protein_coding	NP_014643.1	YOR001W
chrXII	423817	424791	975	976	423943	228	3.02716	1.23234	1.88775	Promoter (<=1kb)	423683	424774	1092	1	850832	NM_001182028	134	RRN5	Rrn5p	protein_coding	NP_013242.1	YLR141W
chrIV	1135408	1136468	1061	1062	1135838	320	80.3634	3.59377	78.6131	Promoter (<=1kb)	1133260	1135431	2172	2	851933	NM_001180641	0	RQC1	Rqc1p	protein_coding	NP_010620.3	YDR333C
chrXVI	404194	407729	3536	3537	404749	508	129.161	3.6652	127.418	Promoter (<=1kb)	404950	406044	1095	1	856024	NM_001183895	0	RPS9A	ribosomal 40S subunit protein S9A	protein_coding	NP_015244.1	YPL081W
chrV	363593	363930	338	339	363731	218	9.92485	1.57697	8.65893	Promoter (<=1kb)	363100	363702	603	1	856839	NM_001178993	493	RPS8B	ribosomal 40S subunit protein S8B	protein_coding	NP_011028.1	YER102W
chrII	591116	591840	725	726	591632	313	37.1465	2.26105	35.6749	Promoter (<=1kb)	591712	592774	1063	2	852479	NM_001178529	934	RPS6B	ribosomal 40S subunit protein S6B	protein_coding	NP_009740.3	YBR181C
chrII	592327	593763	1437	1438	593071	1929	1431.74	13.8288	1428.9	Promoter (<=1kb)	591712	592774	1063	2	852479	NM_001178529	0	RPS6B	ribosomal 40S subunit protein S6B	protein_coding	NP_009740.3	YBR181C
chrXVI	376974	377376	403	404	377234	190	4.96673	1.37535	3.78016	Promoter (1-2kb)	377291	378395	1105	2	856015	NM_001183904	1019	RPS6A	ribosomal 40S subunit protein S6A	protein_coding	NP_015235.1	YPL090C
chrXVI	377904	379598	1695	1696	378814	1805	1295.26	13.0046	1292.49	Promoter (<=1kb)	377291	378395	1105	2	856015	NM_001183904	0	RPS6A	ribosomal 40S subunit protein S6A	protein_coding	NP_015235.1	YPL090C
chrX	650805	652888	2084	2085	651482	1675	1152.09	12.0685	1149.4	Promoter (<=1kb)	651901	652578	678	1	853587	NM_001181781	0	RPS5	ribosomal 40S subunit protein S5	protein_coding	NP_012657.1	YJR123W
chrVIII	504230	504533	304	305	504392	220	10.3389	1.59137	9.0678	Promoter (<=1kb)	504476	505530	1055	2	856610	NM_001179334	997	RPS4B	ribosomal 40S subunit protein S4B	protein_coding	NP_012073.1	YHR203C
chrVIII	504875	506718	1844	1845	505984	2307	1884.01	16.6194	1880.93	Promoter (<=1kb)	504476	505530	1055	2	856610	NM_001179334	0	RPS4B	ribosomal 40S subunit protein S4B	protein_coding	NP_012073.1	YHR203C
chrX	702404	704279	1876	1877	703413	2859	2586.19	20.5942	2582.77	Promoter (<=1kb)	702027	703068	1042	2	853610	NM_001181803	0	RPS4A	ribosomal 40S subunit protein S4A	protein_coding	NP_012679.3	YJR145C
chrXV	678030	679728	1699	1700	679001	2007	1525.7	14.4592	1522.81	Promoter (<=1kb)	678191	678793	603	2	854354	NM_001183601	0	RPS30B	ribosomal 40S subunit protein S30B	protein_coding	NP_014825.3	YOR182C
chrXII	712291	714191	1901	1902	713357	2230	1790.33	16.0649	1787.31	Promoter (<=1kb)	712537	713158	622	2	850994	NM_001182175	0	RPS30A	ribosomal 40S subunit protein S30A	protein_coding	NP_013390.1	YLR287C-A
chrXIV	301630	303729	2100	2101	302449	1165	636.505	8.39612	634.164	Promoter (<=1kb)	302680	303402	723	1	855543	NM_001183016	0	RPS3	ribosomal 40S subunit protein S3	protein_coding	NP_014221.3	YNL178W
chrIV	340319	342163	1845	1846	341424	2294	1868.11	16.5258	1865.05	Promoter (<=1kb)	340628	340798	171	2	851498	NM_001180120	0	RPS29B	ribosomal 40S subunit protein S29B	protein_coding	NP_010222.1	YDL061C
chrXV	648818	649152	335	336	648963	205	7.4241	1.48336	6.19346	Promoter (<=1kb)	648804	649007	204	2	854338	NM_001183586	0	RPS28A	ribosomal 40S subunit protein S28A	protein_coding	NP_014810.1	YOR167C
chrVIII	147725	149446	1722	1723	147976	281	26.3788	2.03062	24.9654	Promoter (<=1kb)	147871	148669	799	2	856415	NM_001179151	0	RPS27B	ribosomal 40S subunit protein S27B	protein_coding	NP_011885.1	YHR021C
chrXI	157922	159435	1514	1515	158430	931	424.335	6.59427	422.215	Promoter (<=1kb)	158613	159212	600	1	853700	NM_001179722	0	RPS27A	ribosomal 40S subunit protein S27A	protein_coding	NP_012766.1	YKL156W
chrV	422552	425510	2959	2960	423304	2393	1989.95	17.2387	1986.82	Promoter (<=1kb)	423952	424311	360	1	856868	NM_001179021	0	RPS26B	ribosomal 40S subunit protein S26B	protein_coding	NP_011057.1	YER131W
chrVII	534056	535818	1763	1764	534992	1599	1070.39	11.5213	1067.76	Promoter (<=1kb)	534132	534458	327	2	852911	NM_001181156	0	RPS25A	ribosomal 40S subunit protein S25A	protein_coding	NP_011541.1	YGR027C
chrIX	231330	233532	2203	2204	231497	199	6.3847	1.44016	5.17132	Promoter (<=1kb)	231553	232369	817	2	854741	NM_001179419	0	RPS24B	ribosomal 40S subunit protein S24B	protein_coding	NP_012195.1	YIL069C
chrVII	727454	728031	578	579	727815	253	18.2324	1.829	16.8799	Promoter (<=1kb)	726974	727730	757	1	853015	NM_001181247	480	RPS23A	ribosomal 40S subunit protein S23A	protein_coding	NP_011633.3	YGR118W
chrXII	855495	857439	1945	1946	855854	297	31.5778	2.14583	30.1336	Promoter (<=1kb)	856442	857317	876	1	851082	NM_001182256	0	RPS22B	ribosomal 40S subunit protein S22B	protein_coding	NP_013471.1	YLR367W
chrX	156305	158431	2127	2128	157607	2064	1592.37	14.8696	1589.44	Promoter (<=1kb)	156550	157273	724	2	853305	NM_001181569	0	RPS21B	ribosomal 40S subunit protein S21B	protein_coding	NP_012399.1	YJL136C
chrXI	551240	551562	323	324	551448	225	11.4075	1.62738	10.1234	Promoter (<=1kb)	551657	552242	586	1	853931	NM_001179847	-95	RPS21A	ribosomal 40S subunit protein S21A	protein_coding	NP_012983.3	YKR057W
chrVIII	74981	75848	868	869	75272	950	446.287	6.84795	444.142	Promoter (<=1kb)	75412	75777	366	1	856371	NM_001179095	0	RPS20	ribosomal 40S subunit protein S20	protein_coding	NP_011848.1	YHL015W
chrXII	1017795	1019895	2101	2102	1019162	1926	1432.19	13.8759	1429.34	Promoter (<=1kb)	1018141	1018908	768	2	851162	NM_001182329	0	RPS1A	ribosomal 40S subunit protein S1A	protein_coding	NP_013546.1	YLR441C
chrXIV	61693	62404	712	713	62161	236	13.922	1.70659	12.6107	Promoter (<=1kb)	61958	62943	986	2	855414	NM_001183140	539	RPS19B	ribosomal 40S subunit protein S19B	protein_coding	NP_014097.1	YNL302C
chrXIV	62839	64464	1626	1627	63209	1648	1122.89	11.8741	1120.22	Promoter (<=1kb)	61958	62943	986	2	855414	NM_001183140	0	RPS19B	ribosomal 40S subunit protein S19B	protein_coding	NP_014097.1	YNL302C
chrXV	91844	95361	3518	3519	93097	2644	2306.64	19.0461	2303.37	Promoter (<=1kb)	92026	92850	825	2	854028	NM_001183375	0	RPS19A	ribosomal 40S subunit protein S19A	protein_coding	NP_014520.1	YOL121C
chrXIII	222604	226935	4332	4333	224172	1716	1196.79	12.3637	1194.08	Promoter (<=1kb)	222987	223828	842	2	854982	NM_001182384	0	RPS18B	ribosomal 40S subunit protein S18B	protein_coding	NP_013686.1	YML026C
chrIV	1354678	1356493	1816	1817	1355827	922	422.976	6.64633	420.857	Promoter (<=1kb)	1354829	1355553	725	2	852058	NM_001180755	0	RPS17B	ribosomal 40S subunit protein S17B	protein_coding	NP_010735.3	YDR447C
chrIV	306613	310201	3589	3590	306777	229	12.2961	1.65618	11.0017	Promoter (<=1kb)	306926	307789	864	2	851476	NM_001180142	0	RPS16B	ribosomal 40S subunit protein S16B	protein_coding	NP_010200.1	YDL083C
chrXV	252845	254894	2050	2051	253944	1602	1073.59	11.5429	1070.95	Promoter (<=1kb)	253149	253577	429	2	854117	NM_001183294	0	RPS15	ribosomal 40S subunit protein S15	protein_coding	NP_014602.1	YOL040C
chrIII	177039	179430	2392	2393	177269	206	7.60447	1.49056	6.37107	Promoter (<=1kb)	177500	178220	721	2	850397	NM_001178745	0	RPS14A	ribosomal 40S subunit protein S14A	protein_coding	NP_009960.2	YCR031C
chrIV	578707	580678	1972	1973	579267	896	399.487	6.41698	397.395	Promoter (<=1kb)	579458	580452	995	1	851636	NM_001180372	0	RPS13	ribosomal 40S subunit protein S13	protein_coding	NP_010349.3	YDR064W
chrXV	1027850	1029759	1910	1911	1028882	2472	2088.45	17.8075	2085.27	Promoter (<=1kb)	1028194	1028625	432	2	854551	NM_001183789	0	RPS12	ribosomal 40S subunit protein S12	protein_coding	NP_015014.3	YOR369C
chrIV	490296	492676	2381	2382	491179	1337	801.28	9.63465	798.811	Promoter (<=1kb)	491515	492324	810	1	851589	NM_001180333	0	RPS11A	ribosomal 40S subunit protein S11A	protein_coding	NP_010308.3	YDR025W
chrXIII	731579	733236	1658	1659	732219	748	427.408	8.89432	424.994	Promoter (<=1kb)	732414	733141	728	1	855270	NM_001182737	0	RPS10B	ribosomal 40S subunit protein S10B	protein_coding	NP_013957.1	YMR230W
chrVII	919603	921813	2211	2212	920143	1084	559.266	7.74962	557.003	Promoter (<=1kb)	920575	921788	1214	1	853128	NM_001181343	0	RPS0A	ribosomal 40S subunit protein S0A	protein_coding	NP_011730.1	YGR214W
chrIV	1239272	1240195	924	925	1239755	318	36.961	2.23951	35.491	Promoter (<=1kb)	1239492	1239824	333	1	851990	NM_001180690	0	RPP2B	ribosomal protein P2B	protein_coding	NP_010670.3	YDR382W
chrIV	416920	417211	292	293	417062	230	12.5229	1.66338	11.2261	Promoter (<=1kb)	415113	416708	1596	2	851542	NM_001180079	-212	RPN4	stress-regulated transcription factor RPN4	protein_coding	NP_010264.3	YDL020C
chrVII	227442	229394	1953	1954	227872	263	20.9972	1.90101	19.622	Promoter (<=1kb)	227754	228329	576	2	852730	NM_001181012	0	RPL9A	ribosomal 60S subunit protein L9A	protein_coding	NP_011368.3	YGL147C
chrXII	47628	49652	2025	2026	48923	2003	1521.05	14.4304	1518.16	Promoter (<=1kb)	47859	48629	771	2	850682	NM_001181865	0	RPL8B	ribosomal 60S subunit protein L8B	protein_coding	NP_013055.1	YLL045C
chrVIII	34760	36815	2056	2057	35602	422	83.6543	3.04593	82.0174	Promoter (<=1kb)	35255	36025	771	2	856352	NM_001179113	0	RPL8A	ribosomal 60S subunit protein L8A	protein_coding	NP_011830.1	YHL033C
chrVII	364870	366901	2032	2033	365218	300	32.5944	2.16744	31.1449	Promoter (<=1kb)	364335	365996	1662	2	852804	NM_001180941	0	RPL7A	ribosomal 60S subunit protein L7A	protein_coding	NP_011439.1	YGL076C
chrXIII	123082	125312	2231	2232	124477	3437	3371.21	24.7563	3367.44	Promoter (<=1kb)	123227	124172	946	2	854902	NM_001182432	0	RPL6A	ribosomal 60S subunit protein L6A	protein_coding	NP_013638.1	YML073C
chrXVI	302337	304201	1865	1866	302841	760	295.722	5.4798	293.751	Promoter (<=1kb)	303121	304014	894	1	855972	NM_001183945	0	RPL5	ribosomal 60S subunit protein L5	protein_coding	NP_015194.1	YPL131W
chrVIII	381261	383974	2714	2715	381587	360	55.4749	2.59948	53.9265	Promoter (<=1kb)	381990	382751	762	2	856544	NM_001179271	0	RPL42B	ribosomal 60S subunit protein L42B	protein_coding	NP_012010.1	YHR141C
chrXIV	330349	332463	2115	2116	331024	839	513.885	9.89411	511.369	Promoter (<=1kb)	331322	332154	833	1	855560	NM_001183000	0	RPL42A	ribosomal 60S subunit protein L42A	protein_coding	NP_014237.2	YNL162W
chrIV	221187	222744	1558	1559	222113	1985	1500.16	14.3008	1497.28	Promoter (<=1kb)	221724	221801	78	2	851422	NM_001180194	0	RPL41B	ribosomal 60S subunit protein L41B	protein_coding	NP_010148.1	YDL133C-A
chrIV	129753	133608	3856	3857	130758	2652	2316.91	19.1037	2313.63	Promoter (<=1kb)	130407	130484	78	2	851344	NM_001180244	0	RPL41A	ribosomal 60S subunit protein L41A	protein_coding	NP_010097.1	YDL184C
chrXI	617905	619646	1742	1743	618986	1439	903.618	10.3691	901.086	Promoter (<=1kb)	617996	618750	755	2	853969	NM_001179884	0	RPL40B	ubiquitin-ribosomal 60S subunit protein L40B fusion protein	protein_coding	NP_013020.3	YKR094C
chrXII	780608	782432	1825	1826	781649	2521	2123.66	17.7055	2120.46	Promoter (<=1kb)	781143	781379	237	2	851035	NM_001182214	0	RPL38	ribosomal 60S subunit protein L38	protein_coding	NP_013429.1	YLR325C
chrIV	1450061	1451637	1577	1578	1451042	784	313.699	5.65262	311.707	Promoter (<=1kb)	1450198	1450853	656	2	852111	NM_001180808	0	RPL37B	ribosomal 60S subunit protein L37B	protein_coding	NP_010788.1	YDR500C
chrXVI	75200	77205	2006	2007	75456	203	28.3185	2.42248	26.8008	Promoter (<=1kb)	75699	76239	541	2	855826	NM_001184312	0	RPL36B	ribosomal 60S subunit protein L36B	protein_coding	NP_015074.1	YPL249C-A
chrIV	216591	218084	1494	1495	217275	665	227.888	4.79572	225.997	Promoter (<=1kb)	217600	218367	768	1	851419	NM_001180251	0	RPL35B	ribosomal 60S subunit protein L35B	protein_coding	NP_010090.1	YDL136W
chrIX	257063	258283	1221	1222	257343	638	209.647	4.6013	207.779	Promoter (<=1kb)	256226	257063	838	2	854759	NM_001179402	0	RPL34B	ribosomal 60S subunit protein L34B	protein_coding	NP_012212.1	YIL052C
chrV	269170	271146	1977	1978	269399	236	13.922	1.70659	12.6107	Promoter (<=1kb)	269423	270185	763	2	856784	NM_001180036	0	RPL34A	ribosomal 60S subunit protein L34A	protein_coding	NP_010977.2	YER056C-A
chrXV	778310	781151	2842	2843	778511	223	10.9743	1.61298	9.69532	Promoter (<=1kb)	778555	779405	851	2	854409	NM_001183653	0	RPL33B	ribosomal 60S subunit protein L33B	protein_coding	NP_014877.3	YOR234C
chrXVI	280589	283287	2699	2700	280837	265	21.5697	1.91541	20.1902	Promoter (<=1kb)	282122	282970	849	1	855960	NM_001183957	0	RPL33A	ribosomal 60S subunit protein L33A	protein_coding	NP_015182.1	YPL143W
chrXV	444246	446274	2029	2030	444917	474	110.353	3.42037	108.65	Promoter (<=1kb)	444686	445849	1164	1	854229	NM_001183482	0	RPL3	ribosomal 60S subunit protein L3	protein_coding	NP_014706.1	YOR063W
chrIX	315541	318127	2587	2588	316396	3958	4115.33	28.5079	4111.36	Promoter (<=1kb)	316768	317932	1165	1	854794	NM_001179368	0	RPL2B	ribosomal 60S subunit protein L2B	protein_coding	NP_012246.1	YIL018W
chrVII	437116	441367	4252	4253	437592	294	30.5742	2.12423	29.1357	Promoter (<=1kb)	437467	437934	468	2	852852	NM_001180896	0	RPL24A	ribosomal 60S subunit protein L24A	protein_coding	NP_011484.1	YGL031C
chrII	59919	61786	1868	1869	60202	256	19.0444	1.8506	17.6849	Promoter (<=1kb)	59822	60739	918	2	852191	NM_001178327	0	RPL23A	ribosomal 60S subunit protein L23A	protein_coding	NP_009466.1	YBL087C
chrVI	64081	66055	1975	1976	65165	3006	2781.4	21.6528	2777.89	Promoter (<=1kb)	64243	64932	690	2	850509	NM_001184310	0	RPL22B	ribosomal 60S subunit protein L22B	protein_coding	NP_116619.1	YFL034C-A
chrXII	261849	264152	2304	2305	262988	1242	682.224	8.46661	679.843	Promoter (<=1kb)	263194	263948	755	1	850750	NM_001181948	0	RPL22A	ribosomal 60S subunit protein L22A	protein_coding	NP_013162.1	YLR061W
chrXV	900019	902342	2324	2325	900273	252	16.8479	1.7817	15.509	Promoter (<=1kb)	900250	901194	945	2	854489	NM_001183732	0	RPL20B	ribosomal 60S subunit protein L20B	protein_coding	NP_014957.2	YOR312C
chrXVI	135500	135832	333	334	135693	205	7.4241	1.48336	6.19346	Promoter (<=1kb)	135790	136443	654	1	855881	NM_001184034	0	RPL1A	ribosomal 60S subunit protein L1A	protein_coding	NP_015104.1	YPL220W
chrII	413794	416462	2669	2670	414371	264	21.2827	1.90821	19.9053	Promoter (<=1kb)	414186	415261	1076	2	852379	NM_001180057	0	RPL19A	ribosomal 60S subunit protein L19A	protein_coding	NP_009641.1	YBR084C-A
chrXI	108031	110452	2422	2423	108944	2515	2080.62	17.0686	2077.45	Promoter (<=1kb)	109269	110129	861	1	853674	NM_001179746	0	RPL17A	ribosomal 60S subunit protein L17A	protein_coding	NP_012741.1	YKL180W
chrXIV	493579	496138	2560	2561	493846	228	12.0711	1.64898	10.7794	Promoter (<=1kb)	493956	495001	1046	2	855655	NM_001182907	0	RPL16B	ribosomal 60S subunit protein L16B	protein_coding	NP_014330.1	YNL069C
chrIX	98253	100542	2290	2291	98564	243	15.6359	1.75699	14.3074	Promoter (<=1kb)	98527	99416	890	2	854673	NM_001179481	0	RPL16A	ribosomal 60S subunit protein L16A	protein_coding	NP_012133.1	YIL133C
chrXII	201559	203251	1693	1694	202211	405	75.5104	2.92352	73.8967	Promoter (<=1kb)	201976	202590	615	2	850716	NM_001181916	0	RPL15A	ribosomal 60S subunit protein L15A	protein_coding	NP_013129.1	YLR029C
chrVIII	103309	105948	2640	2641	104092	1331	795.363	9.59145	792.898	Promoter (<=1kb)	104277	105091	815	1	856388	NM_001179081	0	RPL14B	ribosomal 60S subunit protein L14B	protein_coding	NP_011862.1	YHL001W
chrXI	430912	432285	1374	1375	431059	229	12.2961	1.65618	11.0017	Promoter (<=1kb)	431906	432720	815	1	853864	NM_001179572	0	RPL14A	ribosomal 60S subunit protein L14A	protein_coding	NP_012920.1	YKL006W
chrIV	1300417	1302427	2011	2012	1301144	1351	815.132	9.73546	812.654	Promoter (<=1kb)	1301616	1302113	498	1	852026	NM_001180726	0	RPL12B	ribosomal 60S subunit protein L12B	protein_coding	NP_010706.3	YDR418W
chrV	51657	54386	2730	2731	52031	224	11.1899	1.62018	9.9084	Promoter (<=1kb)	52721	53218	498	2	856656	NM_001178869	0	RPL12A	ribosomal 60S subunit protein L12A	protein_coding	NP_010860.1	YEL054C
chrXVI	731054	732848	1795	1796	731198	196	5.89299	1.41855	4.68865	Promoter (<=1kb)	731224	731748	525	2	856217	NM_001184199	0	RPL11A	ribosomal 60S subunit protein L11A	protein_coding	NP_015427.1	YPR102C
chrIX	138125	138668	544	545	138398	250	17.4355	1.8074	16.0899	Promoter (<=1kb)	136654	137877	1224	2	854687	NM_001179467	-248	RPI1	Rpi1p	protein_coding	NP_012147.3	YIL119C
chrX	414455	416433	1979	1980	414987	954	449.647	6.87675	447.498	Promoter (<=1kb)	414285	414770	486	2	853442	NM_001181445	0	RPC17	DNA-directed RNA polymerase III subunit RPC17	protein_coding	NP_012523.2	YJL011C
chrII	548939	549540	602	603	549220	267	22.1488	1.92981	20.7648	Promoter (<=1kb)	548362	549009	648	2	852451	NM_001178502	0	RPB5	DNA-directed RNA polymerase core subunit RPB5	protein_coding	NP_009712.1	YBR154C
chrX	139257	140708	1452	1453	140116	929	428.77	6.69673	426.644	Promoter (<=1kb)	140437	141138	702	1	853293	NM_001181581	0	RPA34	DNA-directed RNA polymerase I subunit RPA34	protein_coding	NP_012387.1	YJL148W
chrII	44404	46635	2232	2233	45211	1895	1396.79	13.6527	1393.96	Promoter (<=1kb)	44256	44918	663	2	852184	NM_001178333	0	ROX3	Rox3p	protein_coding	NP_009459.1	YBL093C
chrXII	447789	449953	2165	2166	448704	1735	949.974	8.45573	947.412	Promoter (<=1kb)	447982	448314	333	2	850847	NM_001182041	0	RNH203	Rnh203p	protein_coding	NP_013255.1	YLR154C
chrIV	449193	450286	1094	1095	449815	1260	703.28	8.66425	700.881	Promoter (1-2kb)	447984	449276	1293	1	851563	NM_001180060	1209	RMD1	Rmd1p	protein_coding	NP_010283.3	YDL001W
chrXIII	767928	768771	844	845	768424	822	342.812	5.92625	340.786	Promoter (<=1kb)	763351	768039	4689	2	855289	NM_001182755	0	RKR1	ubiquitin-protein ligase RKR1	protein_coding	NP_013975.1	YMR247C
chrXV	504245	507020	2776	2777	505317	3292	3170.01	23.7122	3166.31	Promoter (<=1kb)	503552	504328	777	2	854262	NM_001183514	0	RKI1	ribose-5-phosphate isomerase RKI1	protein_coding	NP_014738.1	YOR095C
chrXII	73058	73593	536	537	73325	283	27.0078	2.04502	25.5902	Promoter (<=1kb)	70633	73146	2514	2	850625	NM_001181854	0	RIX7	putative AAA family ATPase RIX7	protein_coding	NP_013066.1	YLL034C
chrIII	167912	169635	1724	1725	168382	1142	615.272	8.2305	612.951	Promoter (<=1kb)	167370	167999	630	2	850392	NM_001178742	0	RHB1	putative GTPase RHB1	protein_coding	NP_009956.2	YCR027C
chrIX	247578	249456	1879	1880	247736	213	8.92346	1.54097	7.67064	Promoter (<=1kb)	247902	248396	495	2	854753	NM_001179407	0	RGI2	Rgi2p	protein_coding	NP_012207.3	YIL057C
chrXII	281325	284017	2693	2694	282684	1653	1066.92	10.8529	1064.28	Promoter (<=1kb)	281019	281621	603	2	850762	NM_001181960	0	RFU1	Rfu1p	protein_coding	NP_013174.1	YLR073C
chrXII	897147	899581	2435	2436	897924	1495	948.904	10.5523	946.342	Promoter (<=1kb)	896374	897672	1299	2	851103	NM_001182276	0	REH1	Reh1p	protein_coding	NP_013491.1	YLR387C
chrIII	30302	31306	1005	1006	30674	466	106.078	3.36277	104.384	Promoter (<=1kb)	30910	30996	87	1	23547378	NM_001305014	0	RDT1	Rdt1p	protein_coding	NP_001291943.1	YCL054W-A
chrVII	859492	859819	328	329	859627	130	6.09871	1.55561	4.82697	Promoter (<=1kb)	859063	859476	414	2	853095	NM_001181312	-16	QCR9	ubiquinol--cytochrome-c reductase subunit 9	protein_coding	NP_011699.1	YGR183C
chrXV	989012	989463	452	453	989225	260	20.1504	1.87941	18.7818	Promoter (<=1kb)	986899	988782	1884	2	854530	NM_001183768	-230	PUT4	proline permease PUT4	protein_coding	NP_014993.1	YOR348C
chrXVI	653205	654974	1770	1771	653973	1673	1149.92	12.0541	1147.23	Promoter (<=1kb)	650435	653662	3228	2	856155	NM_001184139	0	PUF2	Puf2p	protein_coding	NP_015367.1	YPR042C
chrVII	799929	800365	437	438	800190	205	7.4241	1.48336	6.19346	Promoter (<=1kb)	800546	801823	1278	1	853060	NM_001181285	-181	PTI1	cleavage polyadenylation factor subunit PTI1	protein_coding	NP_011672.1	YGR156W
chrXIV	317645	317972	328	329	317825	211	8.53666	1.52657	7.2893	Promoter (<=1kb)	316169	317671	1503	2	855552	NM_001183007	0	PSD1	phosphatidylserine decarboxylase 1	protein_coding	NP_014230.1	YNL169C
chrIV	355562	356994	1433	1434	355896	194	5.57574	1.40415	4.37734	Promoter (<=1kb)	355674	356759	1086	2	851504	NM_001180114	0	PSA1	mannose-1-phosphate guanylyltransferase	protein_coding	NP_010228.1	YDL055C
chrXI	101688	107099	5412	5413	102068	228	10.8109	1.59725	9.53433	Promoter (<=1kb)	107316	108599	1284	1	853654	NM_001179747	-217	PRS1	ribose phosphate diphosphokinase subunit PRS1	protein_coding	NP_012740.1	YKL181W
chrXI	107426	107716	291	292	107497	194	2.60707	1.22609	1.48121	Promoter (<=1kb)	107316	108599	1284	1	853654	NM_001179747	110	PRS1	ribose phosphate diphosphokinase subunit PRS1	protein_coding	NP_012740.1	YKL181W
chrII	347164	348093	930	931	347598	1118	593.331	8.05768	591.031	Promoter (<=1kb)	344602	347301	2700	2	852344	NM_001178403	0	PRP6	U4/U6-U5 snRNP complex subunit PRP6	protein_coding	NP_009611.1	YBR055C
chrXIV	110546	110972	427	428	110758	129	5.89634	1.54374	4.62887	Promoter (<=1kb)	110917	112902	1986	1	855442	NM_001183117	0	PRM1	pheromone-regulated protein PRM1	protein_coding	NP_014120.1	YNL279W
chrXIV	518806	519242	437	438	519139	237	14.1615	1.71379	12.8476	Promoter (<=1kb)	517994	518845	852	2	855669	NM_001182894	0	POR1	porin POR1	protein_coding	NP_014343.1	YNL055C
chrX	517451	518307	857	858	517864	962	456.388	6.93436	454.232	Promoter (<=1kb)	516461	517513	1053	2	853500	NM_001181701	0	POL32	DNA polymerase delta subunit POL32	protein_coding	NP_012577.1	YJR043C
chrXV	605474	606448	975	976	605760	181	3.72355	1.31054	2.56493	Promoter (<=1kb)	605347	606171	825	2	854317	NM_001183564	0	PNO1	Pno1p	protein_coding	NP_014788.1	YOR145C
chrIV	1013020	1013841	822	823	1013265	183	3.98443	1.32494	2.81943	Promoter (<=1kb)	1013476	1013643	168	2	851869	NM_001180584	0	PMP3	Pmp3p	protein_coding	NP_010562.1	YDR276C
chrV	122489	123078	590	591	122583	199	6.3847	1.44016	5.17132	Promoter (<=1kb)	122798	122929	132	2	856697	NM_001180029	0	PMP2	proteolipid ATPase	protein_coding	NP_010898.1	YEL017C-A
chrIII	163064	163696	633	634	163382	216	9.51845	1.56257	8.25762	Promoter (<=1kb)	162945	163067	123	2	850389	NM_001178739	0	PMP1	proteolipid ATPase	protein_coding	NP_058137.1	YCR024C-A
chrII	430863	431142	280	281	430976	170	2.4499	1.23133	1.3278	Promoter (<=1kb)	429548	430951	1404	2	852390	NM_001178441	0	PHO5	acid phosphatase PHO5	protein_coding	NP_009651.3	YBR093C
chrIII	137331	139387	2057	2058	137705	385	66.3244	2.7795	64.7397	Promoter (<=1kb)	137746	138996	1251	1	850370	NM_001178725	0	PGK1	phosphoglycerate kinase	protein_coding	NP_009938.2	YCR012W
chrIV	1075016	1076052	1037	1038	1075520	1254	720.486	9.03699	718.074	Promoter (<=1kb)	1073735	1075171	1437	2	851900	NM_001180614	0	PFU1	Pfu1p	protein_coding	NP_010592.1	YDR306C
chrVIII	475263	476211	949	950	475746	958	453.014	6.90555	450.861	Promoter (<=1kb)	474627	475340	714	2	856591	NM_001179316	0	PFS1	Pfs1p	protein_coding	NP_012055.3	YHR185C
chrXIII	671460	674699	3240	3241	671552	180	3.59651	1.30334	2.44112	Promoter (<=1kb)	671887	674766	2880	2	855245	NM_001182712	67	PFK2	6-phosphofructokinase subunit beta	protein_coding	NP_013932.1	YMR205C
chrXIII	675005	675508	504	505	675217	231	12.7515	1.67058	11.4523	Promoter (<=1kb)	671887	674766	2880	2	855245	NM_001182712	-239	PFK2	6-phosphofructokinase subunit beta	protein_coding	NP_013932.1	YMR205C
chrVII	972956	973273	318	319	973108	192	5.26694	1.38975	4.07434	Promoter (<=1kb)	970771	973734	2964	2	853155	NM_001181369	461	PFK1	6-phosphofructokinase subunit alpha	protein_coding	NP_011756.1	YGR240C
chrVII	973741	974131	391	392	973926	195	5.73332	1.41135	4.53196	Promoter (<=1kb)	970771	973734	2964	2	853155	NM_001181369	-7	PFK1	6-phosphofructokinase subunit alpha	protein_coding	NP_011756.1	YGR240C
chrXIII	308614	309247	634	635	308930	420	82.6807	3.03153	81.0465	Promoter (<=1kb)	310208	311752	1545	1	855032	NM_001182514	-961	PEX9	Pex9p	protein_coding	NP_013731.1	YMR018W
chrIII	27402	27885	484	485	27823	127	5.50118	1.51999	4.24257	Promoter (<=1kb)	26925	27359	435	2	850302	NM_001178700	-43	PEX34	Pex34p	protein_coding	NP_009875.1	YCL056C
chrXVI	338460	339482	1023	1024	338914	1219	687.121	8.78496	684.736	Promoter (<=1kb)	337436	338620	1185	2	855991	NM_001183926	0	PEX25	Pex25p	protein_coding	NP_015213.1	YPL112C
chrVII	970447	971038	592	593	970578	170	2.4499	1.23133	1.3278	Promoter (<=1kb)	969187	970053	867	2	853154	NM_001181368	-394	PEX21	Pex21p	protein_coding	NP_011755.3	YGR239C
chrVII	939141	940056	916	917	939654	417	81.2278	3.00993	79.5977	Promoter (<=1kb)	939923	940804	882	1	853137	NM_001181351	0	PET54	Pet54p	protein_coding	NP_011738.3	YGR222W
chrVII	472279	472920	642	643	472616	348	50.5297	2.51307	48.9988	Promoter (<=1kb)	469092	472298	3207	2	852871	NM_001180878	0	PDR1	drug-responsive transcription factor PDR1	protein_coding	NP_011502.1	YGL013C
chrIV	234130	234513	384	385	234390	120	4.22089	1.43687	2.99416	Promoter (<=1kb)	234927	235853	927	1	851430	NM_001180186	-414	PCL2	cyclin PCL2	protein_coding	NP_010156.2	YDL127W
chrVII	255186	255581	396	397	255338	275	24.5286	1.98742	23.1276	Promoter (<=1kb)	255663	256964	1302	1	852743	NM_001180999	-82	PCL10	Pcl10p	protein_coding	NP_011381.1	YGL134W
chrII	6002	7180	1179	1180	6523	396	71.3227	2.85871	69.7217	Promoter (<=1kb)	7605	7733	129	2	852163	NM_001184458	553	PAU9	seripauperin PAU9	protein_coding	NP_076873.1	YBL108C-A
chrI	117	1334	1218	1219	588	362	56.316	2.61389	54.7647	Promoter (<=1kb)	1807	2169	363	2	851229	NM_001180043	835	PAU8	seripauperin PAU8	protein_coding	NP_009332.1	YAL068C
chrXI	114	1089	976	977	288	372	60.5924	2.68589	59.0265	Promoter (1-2kb)	1810	2181	372	2	853656	NM_001179789	1092	PAU16	seripauperin PAU16	protein_coding	NP_012698.1	YKL224C
chrIV	1523873	1525246	1374	1375	1524796	476	111.431	3.43477	109.725	Promoter (<=1kb)	1523249	1523611	363	1	852155	NM_001180850	624	PAU10	seripauperin PAU10	protein_coding	NP_010831.3	YDR542W
chrM	46211	47019	809	810	46357	1214	157.39	2.40716	155.597	Promoter (<=1kb)	46723	46953	231	1	854584	gene-Q0130	0	OLI1	F0 ATP synthase subunit c	protein_coding	NP_009319.1	Q0130
chrVII	398076	398898	823	824	398170	175	2.99481	1.26734	1.85552	Promoter (<=1kb)	398628	400160	1533	1	852825	NM_001180920	0	OLE1	stearoyl-CoA 9-desaturase	protein_coding	NP_011460.3	YGL055W
chrVIII	48069	48419	351	352	48229	144	9.25587	1.72186	7.92594	Promoter (<=1kb)	45929	47968	2040	2	856356	NM_001179109	-101	OCA5	Oca5p	protein_coding	NP_011834.1	YHL029C
chrXI	216484	218745	2262	2263	216903	307	35.0161	2.21784	33.5547	Promoter (<=1kb)	217344	218318	975	1	853739	NM_001179686	0	OAC1	Oac1p	protein_coding	NP_012802.1	YKL120W
chrII	603431	607421	3991	3992	604307	2259	1825.48	16.2738	1822.44	Promoter (<=1kb)	603685	604107	423	2	852486	NM_001178536	0	NTC20	Ntc20p	protein_coding	NP_009747.3	YBR188C
chrVII	806672	807196	525	526	806801	125	5.11895	1.49624	3.86917	Promoter (<=1kb)	806412	807656	1245	2	853064	NM_001181288	460	NSR1	Nsr1p	protein_coding	NP_011675.1	YGR159C
chrXIV	173937	174960	1024	1025	174586	494	121.294	3.56439	119.566	Promoter (<=1kb)	172588	174315	1728	2	855470	NM_001183089	0	NRD1	Nrd1 complex RNA-binding subunit	protein_coding	NP_014148.1	YNL251C
chrVIII	62373	63193	821	822	62766	915	417.205	6.59592	415.093	Promoter (<=1kb)	59123	62563	3441	2	856362	NM_001179103	0	NPR3	Npr3p	protein_coding	NP_011840.1	YHL023C
chrIV	1329054	1329536	483	484	1329128	178	3.34909	1.28894	2.20009	Promoter (<=1kb)	1328783	1330027	1245	1	852042	NM_001180740	271	NPL3	mRNA-binding protein NPL3	protein_coding	NP_010720.3	YDR432W
chrXV	897993	898311	319	320	898083	198	4.03573	1.31338	2.8705	Promoter (<=1kb)	896825	898360	1536	2	854487	NM_001183730	49	NOP58	RNA-processing protein NOP58	protein_coding	NP_014955.1	YOR310C
chrXII	545959	547648	1690	1691	546046	178	2.95004	1.26166	1.81382	Promoter (<=1kb)	546097	547611	1515	1	850894	NM_001182084	0	NOP56	snoRNP complex protein NOP56	protein_coding	NP_013298.1	YLR197W
chrIV	427744	428277	534	535	427873	198	6.21871	1.43296	5.00841	Promoter (<=1kb)	427364	428347	984	1	851548	NM_001180073	380	NOP1	rRNA methyltransferase NOP1	protein_coding	NP_010270.1	YDL014W
chrXVI	821119	824534	3416	3417	821748	1107	547.227	7.32341	544.976	Promoter (<=1kb)	819765	821423	1659	2	856267	NM_001184241	0	NOC4	ribosome biosynthesis protein NOC4	protein_coding	NP_015470.1	YPR144C
chrXIII	556700	557349	650	651	557039	299	32.254	2.16024	30.8064	Promoter (<=1kb)	554793	556475	1683	2	855176	NM_001182647	-225	NDE1	NADH-ubiquinone reductase (H(+)-translocating) NDE1	protein_coding	NP_013865.1	YMR145C
chrXIV	559172	561268	2097	2098	559432	307	35.0161	2.21784	33.5547	Promoter (<=1kb)	559814	560479	666	1	855692	NM_001182875	0	NCE103	carbonate dehydratase NCE103	protein_coding	NP_014362.3	YNL036W
chrXVI	793988	796069	2082	2083	794703	1488	953.91	10.722	951.345	Promoter (<=1kb)	793911	794498	588	2	856249	NM_001184228	0	NAT3	peptide alpha-N-acetyltransferase complex B subunit NAT3	protein_coding	NP_015456.2	YPR131C
chrVII	786861	789199	2339	2340	787164	443	94.1212	3.19715	92.4565	Promoter (<=1kb)	786054	786920	867	2	853050	NM_001181276	0	NAT2	Nat2p	protein_coding	NP_011663.3	YGR147C
chrIV	1245668	1246138	471	472	1245824	254	18.5014	1.8362	17.1466	Promoter (<=1kb)	1246084	1247982	1899	1	851994	NM_001180694	0	MUS81	Mus81p	protein_coding	NP_010674.3	YDR386W
chrVII	599139	599633	495	496	599426	205	7.4241	1.48336	6.19346	Promoter (<=1kb)	599417	601141	1725	1	852946	NM_001181184	0	MUP1	Mup1p	protein_coding	NP_011569.1	YGR055W
chrII	478925	479471	547	548	479106	340	47.3314	2.45547	45.8135	Promoter (<=1kb)	479338	480323	986	1	852416	NM_001178467	0	MUD1	Mud1p	protein_coding	NP_009677.1	YBR119W
chrVII	806179	807325	1147	1148	806254	173	2.77001	1.25294	1.63746	Promoter (<=1kb)	805269	806021	753	2	853062	NM_001181287	-158	MTR3	exosome non-catalytic core subunit MTR3	protein_coding	NP_011674.3	YGR158C
chrXIII	320745	321709	965	966	321178	797	323.571	5.74623	321.567	Promoter (<=1kb)	319437	321017	1581	2	855037	NM_001182519	0	MSS1	Mss1p	protein_coding	NP_013736.1	YMR023C
chrVI	137082	137978	897	898	137560	961	455.544	6.92716	453.389	Promoter (<=1kb)	134521	137157	2637	2	850545	NM_001179963	0	MSH4	MutS family protein MSH4	protein_coding	NP_116652.1	YFL003C
chrX	440484	441209	726	727	440849	212	8.72905	1.53377	7.4789	Promoter (1-2kb)	440994	442553	1560	2	853459	NM_001181660	1344	MRX12	Mrx12p	protein_coding	NP_012536.2	YJR003C
chrXIV	57680	58120	441	442	57945	137	7.60297	1.63874	6.3013	Promoter (<=1kb)	58155	58808	654	1	855410	NM_001183144	-35	MRPS18	mitochondrial 37S ribosomal protein YmS18	protein_coding	NP_014093.1	YNL306W
chrXIII	637004	637398	395	396	637211	138	7.83014	1.65061	6.52434	Promoter (<=1kb)	636291	637004	714	2	855226	NM_001182694	0	MRPS17	mitochondrial 37S ribosomal protein MRPS17	protein_coding	NP_013913.1	YMR188C
chrVII	648030	649807	1778	1779	648363	299	32.254	2.16024	30.8064	Promoter (<=1kb)	647123	648142	1020	2	852975	NM_001181213	0	MRP13	mitochondrial 37S ribosomal protein YmS-A	protein_coding	NP_011598.3	YGR084C
chrVII	253484	254857	1374	1375	254350	2939	2692.03	21.1703	2688.55	Promoter (<=1kb)	252897	253859	963	2	852741	NM_001181001	0	MRM2	21S rRNA (uridine2791-2'-O) methyltransferase	protein_coding	NP_011379.1	YGL136C
chrIV	507471	509778	2308	2309	507776	355	53.3932	2.56348	51.8519	Promoter (<=1kb)	508147	509109	963	1	851597	NM_001180341	0	MRH1	Mrh1p	protein_coding	NP_010316.1	YDR033W
chrVIII	422539	423565	1027	1028	422874	257	19.3184	1.8578	17.9567	Promoter (<=1kb)	423072	423461	390	1	856567	NM_001179293	0	MPC2	mitochondrial pyruvate carrier	protein_coding	NP_012032.1	YHR162W
chrVII	276457	278773	2317	2318	277211	1889	1389.96	13.6095	1387.14	Promoter (<=1kb)	274780	276714	1935	2	852753	NM_001180989	0	MON1	Mon1p	protein_coding	NP_011391.2	YGL124C
chrIX	325961	326245	285	286	326083	117	3.72237	1.40124	2.51036	Promoter (<=1kb)	326103	327995	1893	1	854801	NM_001179364	0	MNT3	alpha-1,3-mannosyltransferase MNT3	protein_coding	NP_012251.3	YIL014W
chrII	350422	351354	933	934	350838	854	367.92	6.15667	365.863	Promoter (<=1kb)	351255	351455	201	1	1466443	NM_001270739	0	MNC1	Mnc1p	protein_coding	NP_001257668.1	YBR056W-A
chrIX	257088	258428	1341	1342	257326	342	99.7055	4.0731	97.8991	Promoter (<=1kb)	257843	258280	438	2	854760	NM_001179401	0	MMF1	isoleucine biosynthesis protein MMF1	protein_coding	NP_012213.3	YIL051C
chrIX	67691	69707	2017	2018	68386	2135	1676.36	15.3809	1673.39	Promoter (<=1kb)	63028	68067	5040	2	854657	NM_001179497	0	MLP2	Mlp2p	protein_coding	NP_012117.3	YIL149C
chrXII	214333	215287	955	956	214965	1707	1185.71	12.277	1183.01	Promoter (<=1kb)	212369	214456	2088	2	850722	NM_001181922	0	MLH2	mismatch repair protein MLH2	protein_coding	NP_013135.1	YLR035C
chrXIII	253175	253617	443	444	253451	228	12.0711	1.64898	10.7794	Promoter (<=1kb)	253162	253272	111	2	855004	NM_001184487	0	MIN4	Min4p	protein_coding	NP_076904.1	YML007C-A
chrXIII	625811	626888	1078	1079	626179	560	159.809	4.03964	158.013	Promoter (<=1kb)	625811	625897	87	1	1466502	NM_001184615	0	MIN3	Min3p	protein_coding	NP_878144.1	YMR182W-A
chrVI	220252	225445	5194	5195	220338	188	4.67516	1.36095	3.4946	Promoter (<=1kb)	223710	223973	264	2	1466402	NM_001184591	0	MIN10	Min10p	protein_coding	NP_878072.1	YFR032C-B
chrXV	274235	275165	931	932	274677	932	431.26	6.71833	429.131	Promoter (<=1kb)	274012	274353	342	2	854131	NM_001183280	0	MIM1	Mim1p	protein_coding	NP_014616.1	YOL026C
chrVI	167037	167848	812	813	167474	847	362.382	6.10627	360.332	Promoter (<=1kb)	166746	167258	513	2	850563	NM_001179976	0	MIC19	Mic19p	protein_coding	NP_116666.1	YFR011C
chrX	453163	453940	778	779	453686	284	27.3246	2.05222	25.9051	Promoter (<=1kb)	452430	453446	1017	1	853464	NM_001181665	733	MHO1	Mho1p	protein_coding	NP_012541.1	YJR008W
chrXV	159061	161387	2327	2328	159461	421	83.1669	3.03873	81.5314	Promoter (<=1kb)	159173	159445	273	1	854067	NM_001184492	0	MHF1	Mhf1p	protein_coding	NP_076910.1	YOL086W-A
chrXIV	351875	352782	908	909	352375	410	77.8742	2.95952	76.2534	Promoter (<=1kb)	352414	352530	117	1	855577	NM_001182983	0	MFA2	mating pheromone a	protein_coding	NP_014254.1	YNL145W
chrIV	1384918	1385217	300	301	1385061	196	5.89299	1.41855	4.68865	Promoter (<=1kb)	1385176	1385286	111	1	852072	NM_001180769	0	MFA1	mating pheromone a	protein_coding	NP_010749.3	YDR461W
chrV	339401	342793	3393	3394	339672	260	15.1566	1.70514	13.833	Promoter (<=1kb)	339864	342167	2304	2	856825	NM_001178982	0	MET6	5-methyltetrahydropteroyltriglutamate-homocysteine S-methyltransferase	protein_coding	NP_011015.3	YER091C
chrX	683600	683936	337	338	683724	188	4.67516	1.36095	3.4946	Promoter (<=1kb)	678957	683285	4329	2	853602	NM_001181795	-315	MET5	sulfite reductase (NADPH) subunit beta	protein_coding	NP_116579.1	YJR137C
chrXI	439835	440660	826	827	440160	329	38.4418	2.24691	36.9649	Promoter (<=1kb)	438777	439385	609	2	853869	NM_001179567	-450	MET14	adenylyl-sulfate kinase	protein_coding	NP_012925.3	YKL001C
chrXVI	812624	813165	542	543	812838	135	7.15774	1.61499	5.86451	Promoter (<=1kb)	810984	812453	1470	2	856260	NM_001184235	-171	MEP3	ammonium permease MEP3	protein_coding	NP_015464.1	YPR138C
chrXIV	357226	357578	353	354	357373	224	11.1899	1.62018	9.9084	Promoter (<=1kb)	357453	358952	1500	1	855580	NM_001182980	0	MEP2	ammonium permease MEP2	protein_coding	NP_014257.1	YNL142W
chrXV	82864	83456	593	594	83235	203	7.06941	1.46896	5.84433	Promoter (<=1kb)	81787	82920	1134	2	853994	NM_001183380	0	MDH2	malate dehydrogenase MDH2	protein_coding	NP_014515.2	YOL126C
chrXV	767935	768246	312	313	768083	244	15.8877	1.76419	14.5568	Promoter (<=1kb)	766869	767777	909	2	854403	NM_001183647	-158	MCP1	Mcp1p	protein_coding	NP_014871.3	YOR228C
chrXI	140502	141528	1027	1028	140963	582	173.417	4.19806	171.599	Promoter (<=1kb)	137932	140691	2760	2	853690	NM_001179731	0	MCD4	mannose-ethanolamine phosphotransferase MCD4	protein_coding	NP_012756.1	YKL165C
chrXV	216309	216719	411	412	216455	140	8.29352	1.67436	6.97964	Promoter (<=1kb)	214017	216137	2121	2	854094	NM_001183315	-172	MAM3	Mam3p	protein_coding	NP_014581.1	YOL060C
chrXI	384097	385796	1700	1701	384371	181	3.72355	1.31054	2.56493	Promoter (<=1kb)	382716	384725	2010	2	853839	NM_001179595	0	MAE1	malate dehydrogenase (oxaloacetate-decarboxylating)	protein_coding	NP_012896.1	YKL029C
chrXIV	715359	716625	1267	1268	716067	561	160.42	4.04684	158.622	Promoter (<=1kb)	714048	715388	1341	2	855786	NM_001183227	0	LYS9	saccharopine dehydrogenase (NADP+, L-glutamate-forming)	protein_coding	NP_014448.1	YNR050C
chrII	473895	474373	479	480	474131	320	39.6943	2.31145	38.2108	Promoter (<=1kb)	469748	473926	4179	2	852412	NM_001178463	0	LYS2	L-aminoadipate-semialdehyde dehydrogenase	protein_coding	NP_009673.1	YBR115C
chrIX	187423	188145	723	724	187908	241	15.1373	1.74259	13.8137	Promoter (<=1kb)	186517	187632	1116	2	854714	NM_001179442	0	LYS12	homoisocitrate dehydrogenase	protein_coding	NP_012172.1	YIL094C
chrIX	420575	421227	653	654	420882	265	21.5697	1.91541	20.1902	Promoter (<=1kb)	419615	420736	1122	2	854852	NM_001179556	0	LYS1	saccharopine dehydrogenase (NAD+, L-lysine-forming)	protein_coding	NP_012300.3	YIR034C
chrXVI	692818	693366	549	550	693002	174	2.88128	1.26014	1.74537	Promoter (<=1kb)	691933	692418	486	2	856187	NM_001184170	-400	LTP1	tyrosine protein phosphatase LTP1	protein_coding	NP_015398.1	YPR073C
chrVI	148305	148791	487	488	148617	251	17.6994	1.8146	16.3514	Promoter (<=1kb)	149110	149724	615	1	850551	NM_001179966	-319	LOC1	Loc1p	protein_coding	NP_116656.1	YFR001W
chrXV	521997	522680	684	685	522472	214	9.11983	1.54817	7.86427	Promoter (<=1kb)	523027	524841	1815	1	854275	NM_001183527	-347	LEU9	2-isopropylmalate synthase LEU9	protein_coding	NP_014751.1	YOR108W
chrXIV	426775	427329	555	556	427152	196	5.89299	1.41855	4.68865	Promoter (<=1kb)	424895	426754	1860	2	855619	NM_001182942	-21	LEU4	2-isopropylmalate synthase LEU4	protein_coding	NP_014295.1	YNL104C
chrXIII	861059	861534	476	477	861281	337	46.1528	2.43387	44.6399	Promoter (<=1kb)	859215	860891	1677	2	855342	NM_001182805	-168	LCB1	serine C-palmitoyltransferase LCB1	protein_coding	NP_014025.1	YMR296C
chrIV	525009	526046	1038	1039	525163	206	7.60447	1.49056	6.37107	Promoter (<=1kb)	525440	527215	1776	1	851607	NM_001180345	0	KRS1	lysine--tRNA ligase KRS1	protein_coding	NP_010322.1	YDR037W
chrXII	826714	827034	321	322	826806	170	2.4499	1.23133	1.3278	Promoter (<=1kb)	823828	826413	2586	2	851061	NM_001182236	-301	KAP95	karyopherin beta	protein_coding	NP_013451.1	YLR347C
chrXI	513081	513697	617	618	513465	359	55.0561	2.59228	53.5091	Promoter (<=1kb)	511999	513159	1161	2	853910	NM_001179828	0	KAE1	tRNA N6-adenosine threonylcarbamoyltransferase	protein_coding	NP_012964.2	YKR038C
chrX	115375	116675	1301	1302	116005	1759	1244.12	12.6734	1241.38	Promoter (<=1kb)	113878	115629	1752	2	853277	NM_001181595	0	JJJ2	Jjj2p	protein_coding	NP_012373.2	YJL162C
chrIV	1443409	1445952	2544	2545	1443939	257	19.3184	1.8578	17.9567	Promoter (<=1kb)	1443713	1445467	1755	2	852108	NM_001180805	0	ITR1	myo-inositol transporter ITR1	protein_coding	NP_010785.1	YDR497C
chrXII	86856	87266	411	412	87046	292	29.9125	2.10983	28.4778	Promoter (<=1kb)	87403	88155	753	1	850632	NM_001181847	-137	ISA1	Fe-binding Fe/S cluster assembly protein ISA1	protein_coding	NP_013073.1	YLL027W
chrV	151666	152591	926	927	152084	421	66.3916	2.64234	64.8068	Promoter (<=1kb)	150301	150978	678	2	856717	NM_001178816	-688	IRC22	Irc22p	protein_coding	NP_010915.1	YEL001C
chrXIII	586187	587206	1020	1021	586621	605	188.027	4.36368	186.189	Promoter (<=1kb)	584271	586388	2118	2	855198	NM_001182667	0	INP2	Inp2p	protein_coding	NP_013886.1	YMR163C
chrXIII	671599	671955	357	358	671719	130	5.59698	1.51938	4.33804	Promoter (<=1kb)	670063	671325	1263	2	855244	NM_001182711	-274	INP1	Inp1p	protein_coding	NP_013931.1	YMR204C
chrXII	950869	953602	2734	2735	951113	323	40.8064	2.33305	39.3178	Promoter (<=1kb)	951156	953183	2028	1	851131	NM_001182301	0	INA1	Ina1p	protein_coding	NP_013517.1	YLR413W
chrV	99644	100799	1156	1157	100169	1089	567.117	7.84886	564.846	Promoter (<=1kb)	100133	100204	72	1	856685	rna-tM(CAU)E	0	IMT4	tRNA-Met	tRNA	.	tM(CAU)E
chrXV	709766	710785	1020	1021	710185	1734	1216.55	12.4934	1213.82	Promoter (<=1kb)	710201	710272	72	1	854367	rna-tM(CAU)O1	0	IMT1	tRNA-Met	tRNA	.	tM(CAU)O1
chrXIII	161898	164522	2625	2626	162111	214	9.11983	1.54817	7.86427	Promoter (<=1kb)	162194	164176	1983	2	854948	NM_001182414	0	IMD4	IMP dehydrogenase IMD4	protein_coding	NP_013656.1	YML056C
chrXII	1004043	1004428	386	387	1004147	171	2.5543	1.23854	1.42871	Promoter (1-2kb)	1002557	1004128	1572	1	851152	NM_001182320	1486	IMD3	IMP dehydrogenase IMD3	protein_coding	NP_013536.3	YLR432W
chrXII	1001874	1002935	1062	1063	1002374	447	96.1643	3.22595	94.4945	Promoter (<=1kb)	1002557	1004128	1572	1	851152	NM_001182320	0	IMD3	IMP dehydrogenase IMD3	protein_coding	NP_013536.3	YLR432W
chrVIII	553669	554709	1041	1042	554183	749	287.591	5.40059	285.629	Promoter (<=1kb)	554396	555967	1572	1	856626	NM_001179347	0	IMD2	IMP dehydrogenase IMD2	protein_coding	NP_012088.3	YHR216W
chrXII	837463	839910	2448	2449	838114	234	41.4337	2.79061	39.8378	Promoter (<=1kb)	838066	839253	1188	2	851069	NM_001182244	0	ILV5	ketol-acid reductoisomerase	protein_coding	NP_013459.1	YLR355C
chrX	464333	466935	2603	2604	464593	180	3.59651	1.30334	2.44112	Promoter (<=1kb)	464451	466208	1758	2	853473	NM_001181674	0	ILV3	dihydroxy-acid dehydratase ILV3	protein_coding	NP_012550.1	YJR016C
chrXIII	483885	486436	2552	2553	484086	193	5.42027	1.39695	4.22472	Promoter (<=1kb)	484084	486147	2064	1	855135	NM_001182608	0	ILV2	acetolactate synthase catalytic subunit	protein_coding	NP_013826.1	YMR108W
chrXV	579690	580079	390	391	579875	259	19.8715	1.8722	18.505	Promoter (<=1kb)	580250	581359	1110	1	854303	NM_001183555	-171	IDH2	isocitrate dehydrogenase (NAD(+)) IDH2	protein_coding	NP_014779.1	YOR136W
chrIV	1162515	1164966	2452	2453	1162715	222	8.27374	1.49804	7.03162	Promoter (<=1kb)	1162957	1164660	1704	2	851946	NM_001180653	0	HXT3	hexose transporter HXT3	protein_coding	NP_010632.1	YDR345C
chrVII	23797	24133	337	338	23928	223	10.9743	1.61298	9.69532	Promoter (<=1kb)	23935	25395	1461	1	852639	NM_001181119	0	HXK2	hexokinase 2	protein_coding	NP_011261.1	YGL253W
chrIV	914024	916336	2313	2314	914837	443	92.1924	3.15135	90.5329	Promoter (<=1kb)	914317	914712	396	2	851810	NM_001180532	0	HTB1	histone H2B	protein_coding	NP_010510.3	YDR224C
chrII	234460	237357	2898	2899	234873	179	3.47167	1.29614	2.3195	Promoter (<=1kb)	235394	235792	399	2	852283	NM_001178243	0	HTA2	histone H2A	protein_coding	NP_009552.1	YBL003C
chrX	538227	539009	783	784	538557	941	438.755	6.78314	436.619	Promoter (<=1kb)	538555	538626	72	1	853515	rna-tR(CCU)J	0	HSX1	tRNA-Arg	tRNA	.	tR(CCU)J
chrX	119949	124064	4116	4117	120373	426	85.614	3.07474	83.9717	Promoter (<=1kb)	120449	121690	1242	1	853281	NM_001181592	0	HSP150	heat shock protein HSP150	protein_coding	NP_012376.3	YJL159W
chrXV	87139	88053	915	916	87430	396	71.3227	2.85871	69.7217	Promoter (<=1kb)	87844	89448	1605	1	853997	NM_001183377	0	HRP1	Hrp1p	protein_coding	NP_014518.1	YOL123W
chrIV	1269764	1270436	673	674	1269951	233	13.2142	1.68498	11.9102	Promoter (<=1kb)	1270068	1270733	666	1	852008	NM_001180707	0	HPT1	hypoxanthine phosphoribosyltransferase	protein_coding	NP_010687.3	YDR399W
chrXV	30596	33725	3130	3131	30789	174	2.88128	1.26014	1.74537	Promoter (<=1kb)	28703	31606	2904	2	854010	NM_001183408	0	HPF1	mannoprotein	protein_coding	NP_014487.1	YOL155C
chrVII	363787	364476	690	691	364297	285	27.6428	2.05942	26.2214	Promoter (<=1kb)	362225	363916	1692	2	852803	NM_001180942	0	HNM1	Hnm1p	protein_coding	NP_011438.1	YGL077C
chrIII	292625	293117	493	494	292920	311	36.4308	2.24665	34.9626	Promoter (<=1kb)	293179	293538	360	2	850458	NM_001178802	421	HMRA2	homeodomain mating type protein a2	protein_coding	NP_010020.1	YCR096C
chrIII	293646	294980	1335	1336	293808	281	8.08775	1.42265	6.84844	Promoter (<=1kb)	293835	294321	487	1	850459	NM_001178804	0	HMRA1	Hmra1p	protein_coding	NP_010021.1	YCR097W
chrIII	13910	15652	1743	1744	14625	319	85.8755	3.79997	84.1073	Promoter (<=1kb)	13282	13809	528	1	850293	NM_001178707	628	HMLALPHA1	transcriptional co-activator mating type protein alpha	protein_coding	NP_009867.1	YCL066W
chrVI	204638	205396	759	760	205009	781	311.434	5.63101	309.445	Promoter (<=1kb)	203743	204750	1008	2	850581	NM_001179990	0	HIS2	histidinol-phosphatase	protein_coding	NP_116681.1	YFR025C
chrV	265537	265939	403	404	265837	189	4.81986	1.36815	3.63622	Promoter (<=1kb)	264892	265785	894	2	856782	NM_001178946	0	HIS1	ATP phosphoribosyltransferase	protein_coding	NP_010975.3	YER055C
chrXIV	575277	577115	1839	1840	575959	276	24.8331	1.99462	23.43	Promoter (<=1kb)	575640	576050	411	2	855700	NM_001182870	0	HHT2	histone H3	protein_coding	NP_014367.1	YNL031C
chrII	256027	256783	757	758	256332	337	46.1528	2.43387	44.6399	Promoter (<=1kb)	256331	256741	411	1	852295	NM_001178358	0	HHT1	histone H3	protein_coding	NP_009564.1	YBR010W
chrXVI	309760	310050	291	292	309895	122	4.57014	1.46062	3.33419	Promoter (<=1kb)	308828	309604	777	2	855976	NM_001183941	-156	HHO1	histone H1	protein_coding	NP_015198.1	YPL127C
chrII	255052	255506	455	456	255405	192	5.26694	1.38975	4.07434	Promoter (<=1kb)	255373	255684	312	2	852294	NM_001178357	178	HHF1	histone H4	protein_coding	NP_009563.1	YBR009C
chrXII	721188	721766	579	580	721355	186	3.51907	1.29273	2.36671	Promoter (<=1kb)	720771	721430	660	2	851000	NM_001182181	0	GSP1	Ran GTPase GSP1	protein_coding	NP_013396.1	YLR293C
chrIV	644653	645400	748	749	645191	987	477.639	7.11438	475.459	Promoter (<=1kb)	644178	644930	753	2	851672	NM_001180406	0	GRX3	monothiol glutaredoxin GRX3	protein_coding	NP_010383.4	YDR098C
chrIV	392513	392793	281	282	392655	223	10.9743	1.61298	9.69532	Promoter (<=1kb)	389172	392057	2886	2	851527	NM_001180094	-456	GPR1	Gpr1p	protein_coding	NP_010249.1	YDL035C
chrIX	254789	256443	1655	1656	255152	338	46.5444	2.44107	45.0298	Promoter (<=1kb)	255115	255867	753	1	854758	NM_001179403	0	GPP1	glycerol-1-phosphatase RHR2	protein_coding	NP_012211.2	YIL053W
chrXI	163572	165147	1576	1577	163972	342	48.1235	2.46987	46.6024	Promoter (<=1kb)	163642	164385	744	2	853705	NM_001179718	0	GPM1	phosphoglycerate mutase GPM1	protein_coding	NP_012770.1	YKL152C
chrIV	1468619	1469079	461	462	1468873	230	12.5229	1.66338	11.2261	Promoter (<=1kb)	1466453	1468444	1992	2	852121	NM_001180816	-175	GNP1	glutamine permease GNP1	protein_coding	NP_010796.1	YDR508C
chrIV	1461308	1462361	1054	1055	1461811	936	434.586	6.74714	432.454	Promoter (<=1kb)	1459728	1461554	1827	2	852117	NM_001180814	0	GMC1	putative oxidoreductase	protein_coding	NP_010794.3	YDR506C
chrV	67032	69616	2585	2586	67299	223	10.9743	1.61298	9.69532	Promoter (<=1kb)	67629	68792	1164	2	856665	NM_001178861	0	GLY1	threonine aldolase GLY1	protein_coding	NP_010868.1	YEL046C
chrXVI	641285	643668	2384	2385	641548	276	24.8331	1.99462	23.43	Promoter (<=1kb)	642208	643320	1113	1	856147	NM_001184132	0	GLN1	glutamate--ammonia ligase	protein_coding	NP_015360.2	YPR035W
chrXII	329287	329593	307	308	329455	128	5.69715	1.53186	4.43414	Promoter (<=1kb)	327730	329238	1509	2	850783	NM_001181981	-49	GIS3	Gis3p	protein_coding	NP_013195.1	YLR094C
chrXIV	167021	167710	690	691	167359	109	2.5453	1.30624	1.37656	Promoter (<=1kb)	167329	167790	462	2	855466	NM_001183093	80	GIS2	mRNA-binding translational activator GIS2	protein_coding	NP_014144.1	YNL255C
chrXI	665581	666452	872	873	666186	401	73.6385	2.89472	72.0303	Distal Intergenic	661442	663289	1848	1	853981	NM_001179896	4139	GEX2	glutathione exchanger	protein_coding	NP_013032.1	YKR106W
chrXV	1003817	1004817	1001	1002	1004224	323	40.8064	2.33305	39.3178	Promoter (<=1kb)	1005137	1006705	1569	1	854537	NM_001183775	-320	GDS1	Gds1p	protein_coding	NP_015000.3	YOR355W
chrXV	1041508	1043433	1926	1927	1041805	212	8.72905	1.53377	7.4789	Promoter (<=1kb)	1041678	1043042	1365	2	854557	NM_001183795	0	GDH1	glutamate dehydrogenase (NADP(+)) GDH1	protein_coding	NP_015020.3	YOR375C
chrXIII	886933	889159	2227	2228	887117	226	11.6268	1.63458	10.3401	Promoter (<=1kb)	887003	888682	1680	1	855355	NM_001182818	0	GAS1	1,3-beta-glucanosyltransferase GAS1	protein_coding	NP_014038.1	YMR307W
chrXI	514682	517334	2653	2654	514955	446	95.6521	3.21875	93.9834	Promoter (<=1kb)	515063	516871	1809	1	853912	NM_001179829	0	GAP1	amino acid permease GAP1	protein_coding	NP_012965.3	YKR039W
chrXIV	374018	375626	1609	1610	374858	3108	2918.69	22.3872	2915.12	Promoter (<=1kb)	374171	374692	522	2	855589	NM_001182971	0	FYV6	Fyv6p	protein_coding	NP_014266.3	YNL133C
chrVIII	362000	362347	348	349	362277	185	4.25415	1.33935	3.08288	Promoter (<=1kb)	362115	362765	651	1	856529	NM_001179258	0	FUR1	uracil phosphoribosyltransferase	protein_coding	NP_011996.2	YHR128W
chrXV	845894	846223	330	331	846062	248	16.9127	1.793	15.5718	Promoter (<=1kb)	844992	845792	801	2	854454	NM_001183699	-102	FSH3	putative serine hydrolase	protein_coding	NP_014923.1	YOR280C
chrXV	831842	833084	1243	1244	832312	768	301.678	5.5374	299.7	Promoter (<=1kb)	831059	832042	984	2	854445	NM_001183690	0	FSF1	Fsf1p	protein_coding	NP_014914.1	YOR271C
chrXV	925123	925599	477	478	925330	314	37.5064	2.26825	36.0331	Promoter (<=1kb)	923232	925040	1809	2	854503	NM_001183744	-83	FRT1	Frt1p	protein_coding	NP_014969.3	YOR324C
chrIII	76258	76749	492	493	76607	185	4.25415	1.33935	3.08288	Promoter (<=1kb)	74704	75285	582	2	850332	NM_001178713	-973	FRM2	type II nitroreductase	protein_coding	NP_009904.2	YCL026C-A
chrXII	240931	243995	3065	3066	241852	4334	4402.63	26.9567	4398.62	Promoter (<=1kb)	239347	241407	2061	2	850736	NM_001181934	0	FRE8	putative ferric-chelate reductase	protein_coding	NP_013148.1	YLR047C
chrII	331793	334055	2263	2264	332552	3164	2994.69	22.7905	2991.09	Promoter (<=1kb)	331833	332360	528	1	852336	NM_001178395	0	FMP23	Fmp23p	protein_coding	NP_009603.1	YBR047W
chrV	266229	268279	2051	2052	266303	174	2.88128	1.26014	1.74537	Promoter (<=1kb)	266512	268113	1602	2	856783	NM_001178947	0	FCY2	purine-cytosine permease	protein_coding	NP_010976.1	YER056C
chrIV	1150117	1151603	1487	1488	1150795	759	294.979	5.4726	293.009	Promoter (<=1kb)	1149951	1150520	570	2	851939	NM_001180647	0	FCF1	rRNA-processing protein FCF1	protein_coding	NP_010626.1	YDR339C
chrXI	325966	328177	2212	2213	326483	389	68.1265	2.80831	66.5362	Promoter (<=1kb)	326408	327487	1080	2	853805	NM_001179626	0	FBA1	fructose-bisphosphate aldolase FBA1	protein_coding	NP_012863.1	YKL060C
chrXVI	108376	114620	6245	6246	108675	255	14.8049	1.70201	13.4858	Promoter (<=1kb)	108652	114315	5664	1	855845	NM_001184045	0	FAS2	trifunctional fatty acid synthase subunit FAS2	protein_coding	NP_015093.1	YPL231W
chrXI	99599	101316	1718	1719	100020	229	10.2058	1.57044	8.93712	Promoter (<=1kb)	100671	106826	6156	1	853653	NM_001179748	0	FAS1	tetrafunctional fatty acid synthase subunit FAS1	protein_coding	NP_012739.1	YKL182W
chrXIII	759234	763178	3945	3946	759563	267	22.031	1.92585	20.6489	Promoter (<=1kb)	759807	761891	2085	1	855288	NM_001182754	0	FAA4	long-chain fatty acid-CoA ligase FAA4	protein_coding	NP_013974.1	YMR246W
chrXII	728534	730596	2063	2064	728795	234	10.2048	1.56239	8.93613	Promoter (<=1kb)	728955	730301	1347	1	851007	NM_001182188	0	EXG1	glucan 1,3-beta-glucosidase	protein_coding	NP_013403.1	YLR300W
chrIX	335936	336791	856	857	336397	838	355.3	6.04146	353.258	Promoter (<=1kb)	335666	336212	547	2	854806	NM_001184306	0	EST3	telomerase subunit EST3	protein_coding	NP_012256.1	YIL009C-A
chrVII	400909	402102	1194	1195	401583	1671	1147.75	12.0397	1145.07	Promoter (<=1kb)	400871	401287	417	2	852826	NM_001180919	0	ERV14	cornichon family protein	protein_coding	NP_011461.1	YGL054C
chrXIII	302739	303060	322	323	302905	194	5.57574	1.40415	4.37734	Promoter (<=1kb)	300869	302485	1617	2	855029	NM_001182511	-254	ERG5	C-22 sterol desaturase	protein_coding	NP_013728.1	YMR015C
chrVII	496484	497426	943	944	496982	373	53.3994	2.49756	51.8582	Promoter (<=1kb)	495453	496502	1050	2	852883	NM_001180866	0	ERG26	sterol-4-alpha-carboxylate 3-dehydrogenase (decarboxylating)	protein_coding	NP_011514.1	YGL001C
chrXIII	667122	667747	626	627	667363	299	32.254	2.16024	30.8064	Promoter (<=1kb)	667537	668205	669	1	855242	NM_001182709	0	ERG2	C-8 sterol isomerase ERG2	protein_coding	NP_013929.1	YMR202W
chrXV	796745	797530	786	787	797138	255	18.7721	1.8434	17.4149	Promoter (<=1kb)	795801	796793	993	2	854420	NM_001183665	0	ENV9	Env9p	protein_coding	NP_014889.3	YOR246C
chrVII	1000533	1002306	1774	1775	1000906	330	39.6644	2.27775	38.1823	Promoter (<=1kb)	1000927	1002240	1314	1	853169	NM_001181383	0	ENO1	phosphopyruvate hydratase ENO1	protein_coding	NP_011770.3	YGR254W
chrXIII	572512	573332	821	822	572708	218	9.92485	1.57697	8.65893	Promoter (<=1kb)	572883	572955	73	2	855191	rna-tM(CAU)M	0	EMT4	tRNA-Met	tRNA	.	tM(CAU)M
chrX	422549	423538	990	991	422963	934	432.922	6.73273	430.792	Promoter (<=1kb)	422937	423009	73	1	853448	rna-tM(CAU)J2	0	EMT3	tRNA-Met	tRNA	.	tM(CAU)J2
chrXV	976328	978600	2273	2274	976525	1407	871.163	10.1387	868.652	Promoter (<=1kb)	976421	976493	73	1	854524	rna-tM(CAU)O2	0	EMT2	tRNA-Met	tRNA	.	tM(CAU)O2
chrIV	1175436	1176342	907	908	1175842	1220	688.069	8.79216	685.682	Promoter (<=1kb)	1175829	1175901	73	1	851951	rna-tM(CAU)D	0	EMT1	tRNA-Met	tRNA	.	tM(CAU)D
chrXVI	481446	482321	876	877	481591	197	6.05479	1.42576	4.84746	Promoter (<=1kb)	481428	481901	474	2	856070	NM_001183851	0	EGD1	Egd1p	protein_coding	NP_015288.1	YPL037C
chrIV	1242715	1243392	678	679	1243198	349	50.9351	2.52028	49.4026	Promoter (<=1kb)	1243230	1245758	2529	1	851993	NM_001180693	0	EFT2	elongation factor 2	protein_coding	NP_010673.1	YDR385W
chrI	141868	143541	1674	1675	142202	337	46.1528	2.43387	44.6399	Promoter (<=1kb)	142174	143160	987	1	851260	NM_001178150	0	EFB1	translation elongation factor 1 subunit beta	protein_coding	NP_009398.1	YAL003W
chrXI	448006	448273	268	269	448121	116	3.56302	1.38937	2.35606	Promoter (<=1kb)	446799	448036	1238	2	853873	NM_001179794	0	ECM9	Ecm9p	protein_coding	NP_012929.4	YKR004C
chrII	392658	395493	2836	2837	392928	296	27.9261	2.03757	26.5043	Promoter (<=1kb)	393123	394742	1620	1	852370	NM_001178426	0	ECM33	Ecm33p	protein_coding	NP_009634.2	YBR078W
chrX	53998	54406	409	410	54251	144	9.25587	1.72186	7.92594	Promoter (<=1kb)	54379	56178	1800	1	853229	NM_001181634	0	ECM25	Ecm25p	protein_coding	NP_012334.1	YJL201W
chrIV	702555	703330	776	777	702901	409	77.3993	2.95232	75.7798	Promoter (<=1kb)	701397	702758	1362	2	851703	NM_001180433	0	ECM18	alpha/beta hydrolase family protein	protein_coding	NP_010410.3	YDR125C
chrII	237666	239012	1347	1348	238338	1042	461.141	6.37176	458.98	Promoter (<=1kb)	237153	237467	315	2	852285	NM_001178241	-199	ECM15	Ecm15p	protein_coding	NP_009554.1	YBL001C
chrV	408906	409340	435	436	409115	264	21.2827	1.90821	19.9053	Promoter (<=1kb)	407342	409063	1722	2	856861	NM_001179014	0	DSE1	Dse1p	protein_coding	NP_011050.3	YER124C
chrXV	759047	759847	801	802	759585	329	43.0664	2.37626	41.567	Promoter (<=1kb)	759782	760660	879	1	854398	NM_001183642	0	DSC3	Dsc3p	protein_coding	NP_014866.3	YOR223W
chrV	335388	335756	369	370	335611	191	5.11576	1.38255	3.92609	Promoter (<=1kb)	333176	335188	2013	2	856822	NM_001178979	-200	DOT6	Dot6p	protein_coding	NP_011012.3	YER088C
chrXIV	628291	629408	1118	1119	628864	513	106.021	3.14431	104.328	Promoter (<=1kb)	627456	628616	1161	1	855731	NM_001182840	835	DOM34	ribosome dissociation factor DOM34	protein_coding	NP_014397.1	YNL001W
chrXV	285459	286015	557	558	285703	297	31.5778	2.14583	30.1336	Promoter (<=1kb)	282421	285426	3006	2	854138	NM_001183275	-33	DIS3	exosome catalytic subunit DIS3	protein_coding	NP_014621.1	YOL021C
chrXVI	40223	40780	558	559	40480	260	20.1504	1.87941	18.7818	Promoter (<=1kb)	41043	42869	1827	1	855863	NM_001184079	-263	DIP5	Dip5p	protein_coding	NP_015058.1	YPL265W
chrXV	724326	725502	1177	1178	724554	201	6.72293	1.45456	5.50353	Promoter (1-2kb)	722911	724725	1815	1	854379	NM_001183623	1415	DED1	DEAD-box ATP-dependent RNA helicase DED1	protein_coding	NP_014847.3	YOR204W
chrXV	722616	723994	1379	1380	722722	186	4.39231	1.34655	3.21792	Promoter (<=1kb)	722911	724725	1815	1	854379	NM_001183623	0	DED1	DEAD-box ATP-dependent RNA helicase DED1	protein_coding	NP_014847.3	YOR204W
chrVIII	388539	389337	799	800	388969	1129	603.36	8.13689	601.05	Promoter (<=1kb)	387788	388726	939	2	856548	NM_001179275	0	DCD1	deoxycytidine monophosphate deaminase	protein_coding	NP_012014.1	YHR144C
chrVII	362171	362680	510	511	362260	179	3.47167	1.29614	2.3195	Promoter (<=1kb)	360288	361859	1572	2	852802	NM_001180943	-312	DBP3	RNA-dependent ATPase DBP3	protein_coding	NP_011437.3	YGL078C
chrXIV	413566	414928	1363	1364	414099	207	7.78689	1.49776	6.55074	Promoter (<=1kb)	413639	416281	2643	1	855611	NM_001182950	0	DBP2	DEAD-box ATP-dependent RNA helicase DBP2	protein_coding	NP_014287.3	YNL112W
chrVII	798404	799119	716	717	798550	202	6.89515	1.46176	5.67288	Promoter (<=1kb)	798543	800066	1524	1	853059	NM_001181284	0	CYS4	cystathionine beta-synthase CYS4	protein_coding	NP_011671.3	YGR155W
chrXIV	415241	416577	1337	1338	415485	222	10.7607	1.60578	9.48427	Promoter (<=1kb)	416940	417302	363	2	855612	NM_001182949	725	CYB5	Cyb5p	protein_coding	NP_014288.3	YNL111C
chrXIV	417467	417929	463	464	417666	233	13.2142	1.68498	11.9102	Promoter (<=1kb)	416940	417302	363	2	855612	NM_001182949	-165	CYB5	Cyb5p	protein_coding	NP_014288.3	YNL111C
chrXII	710269	710948	680	681	710517	227	11.8481	1.64178	10.5588	Promoter (<=1kb)	708448	710136	1689	2	850992	NM_001182173	-133	CTS1	chitinase	protein_coding	NP_013388.1	YLR286C
chrXVI	785722	786214	493	494	785996	166	15.3503	1.98311	13.9409	Promoter (<=1kb)	786208	787428	1221	1	856241	NM_001184221	0	CTR1	high-affinity Cu transporter CTR1	protein_coding	NP_015449.1	YPR124W
chrX	423935	424918	984	985	424517	1147	619.871	8.2665	617.546	Promoter (<=1kb)	423138	424109	972	2	853450	NM_001181440	0	CTK2	Ctk2p	protein_coding	NP_012528.1	YJL006C
chrIX	23679	25292	1614	1615	23797	177	3.22873	1.28174	2.08298	Promoter (<=1kb)	23119	26106	2988	2	854637	NM_001179517	814	CSS1	Css1p	protein_coding	NP_012097.1	YIL169C
chrIX	25807	28770	2964	2965	26293	289	28.9309	2.08823	27.5017	Promoter (<=1kb)	23119	26106	2988	2	854637	NM_001179517	0	CSS1	Css1p	protein_coding	NP_012097.1	YIL169C
chrVII	878043	879331	1289	1290	878786	1271	697.46	8.45687	695.066	Promoter (<=1kb)	876669	878192	1524	2	853102	NM_001181318	0	CRH1	transglycosylase	protein_coding	NP_011705.1	YGR189C
chrXV	882882	883470	589	590	883062	207	7.78689	1.49776	6.55074	Promoter (<=1kb)	882899	884134	1236	1	854479	NM_001183722	0	CPA1	carbamoyl-phosphate synthase (glutamine-hydrolyzing) CPA1	protein_coding	NP_014947.3	YOR303W
chrM	81241	81926	686	687	81371	556	28.8102	1.6723	27.3826	Promoter (2-3kb)	79213	80022	810	1	854627	gene-Q0275	2028	COX3	cytochrome c oxidase subunit 3	protein_coding	NP_009328.1	Q0275
chrVII	1083263	1084147	885	886	1083751	295	30.9073	2.13143	29.4668	Promoter (<=1kb)	1081584	1082729	1146	2	853212	NM_001181424	-534	COS6	Cos6p	protein_coding	NP_011811.1	YGR295C
chrX	744921	745605	685	686	745213	697	250.119	5.02615	248.2	Promoter (<=1kb)	742848	743999	1152	2	853626	NM_001181819	-922	COS5	Cos5p	protein_coding	NP_012695.3	YJR161C
chrVI	4840	5911	1072	1073	5119	385	66.3244	2.7795	64.7397	Promoter (<=1kb)	6426	7565	1140	1	850482	NM_001179905	-515	COS4	Cos4p	protein_coding	NP_116593.1	YFL062W
chrVII	1003797	1004602	806	807	1004226	905	409.002	6.52391	406.898	Promoter (<=1kb)	1002523	1003962	1440	2	853170	NM_001181384	0	COQ6	putative N,N-dimethylaniline monooxygenase COQ6	protein_coding	NP_011771.1	YGR255C
chrXIII	131444	132343	900	901	131859	1000	488.798	7.20799	486.607	Promoter (<=1kb)	129749	131572	1824	2	854904	NM_001182430	0	COG8	Golgi transport complex subunit COG8	protein_coding	NP_013640.1	YML071C
chrXVI	188537	189040	504	505	188801	364	57.1618	2.62829	55.6077	Promoter (<=1kb)	188307	188513	207	2	1466518	NM_001184537	-24	COA2	Coa2p	protein_coding	NP_878179.1	YPL189C-A
chrXIII	650140	652953	2814	2815	650999	1582	1035.33	11.0961	1032.72	Promoter (<=1kb)	652594	652887	294	2	1466503	NM_001184524	0	CMC4	Cmc4p	protein_coding	NP_878145.1	YMR194C-B
chrIV	176307	176693	387	388	176512	142	8.76882	1.69811	7.44686	Promoter (<=1kb)	176773	178056	1284	1	851400	NM_001180215	-80	CLB3	B-type cyclin CLB3	protein_coding	NP_010126.1	YDL155W
chrVII	702948	703392	445	446	703330	186	4.39231	1.34655	3.21792	Promoter (<=1kb)	703636	705051	1416	1	853002	NM_001181237	-244	CLB1	B-type cyclin CLB1	protein_coding	NP_011622.1	YGR108W
chrII	504444	504748	305	306	504593	266	21.8585	1.92261	20.4768	Promoter (<=1kb)	504854	505306	453	1	852432	NM_001178483	-106	CKS1	cyclin-dependent protein kinase regulatory subunit CKS1	protein_coding	NP_009693.3	YBR135W
chrXVI	555611	556489	879	880	556063	531	127.652	3.51116	125.912	Promoter (<=1kb)	556377	557837	1461	1	856107	NM_001184098	0	CIT3	citrate (Si)-synthase CIT3	protein_coding	NP_015325.1	YPR001W
chrVII	801398	801804	407	408	801607	227	11.8481	1.64178	10.5588	Promoter (<=1kb)	802440	805049	2610	1	853061	NM_001181286	-636	CHO2	phosphatidylethanolamine N-methyltransferase	protein_coding	NP_011673.1	YGR157W
chrIII	13915	17368	3454	3455	14648	672	232.695	4.84613	230.798	Promoter (<=1kb)	15798	16880	1083	2	850295	NM_001178706	0	CHA1	L-serine/L-threonine ammonia-lyase CHA1	protein_coding	NP_001018030.1	YCL064C
chrXIII	807872	808639	768	769	808305	852	366.335	6.14227	364.28	Promoter (<=1kb)	808246	808317	72	2	855314	rna-tQ(CUG)M	0	CDC65	tRNA-Gln	tRNA	.	tQ(CUG)M
chrXV	60649	61252	604	605	60829	191	5.11576	1.38255	3.92609	Promoter (<=1kb)	60383	61024	642	2	854026	NM_001183393	0	CDC33	translation initiation factor eIF4E	protein_coding	NP_014502.1	YOL139C
chrIV	720604	721756	1153	1154	721134	261	20.4311	1.88661	19.0603	Promoter (<=1kb)	721071	721481	411	2	851712	gene-YDR134C	0	CCW22	.	pseudogene	.	YDR134C
chrXII	903415	904463	1049	1050	903645	218	9.92485	1.57697	8.65893	Promoter (<=1kb)	903724	904440	717	1	851107	NM_001184303	0	CCW14	Ccw14p	protein_coding	NP_013495.1	YLR390W-A
chrXII	369140	371730	2591	2592	369775	831	297.558	5.02707	295.585	Promoter (<=1kb)	369697	370098	402	2	850800	NM_001181997	0	CCW12	Ccw12p	protein_coding	NP_013211.1	YLR110C
chrXII	576277	576823	547	548	576581	290	21.8681	1.86606	20.4863	Promoter (<=1kb)	576825	577793	969	1	850917	NM_001182107	-2	CCC1	Ccc1p	protein_coding	NP_013321.1	YLR220W
chrXII	506030	507570	1541	1542	506403	239	8.30469	1.47663	7.06249	Promoter (<=1kb)	506134	507585	1452	1	850872	NM_001182062	0	CBF5	pseudouridine synthase CBF5	protein_coding	NP_013276.1	YLR175W
chrXIV	89593	90109	517	518	89702	188	4.67516	1.36095	3.4946	Promoter (<=1kb)	90303	91424	1122	1	855428	NM_001183126	-194	CAF40	CCR4-NOT core subunit CAF40	protein_coding	NP_014111.1	YNL288W
chrV	491883	492832	950	951	492413	1486	951.843	10.7076	949.279	Promoter (<=1kb)	491530	491958	429	2	856904	NM_001179049	0	BUR6	negative cofactor 2 transcription regulator complex subunit BUR6	protein_coding	NP_011086.3	YER159C
chrX	598423	598776	354	355	598577	157	12.6987	1.87624	11.3193	Promoter (<=1kb)	598735	603078	4344	1	853554	NM_001181749	0	BUD4	Bud4p	protein_coding	NP_012625.5	YJR092W
chrII	63085	63660	576	577	63398	324	41.1798	2.34026	39.6893	Promoter (<=1kb)	63876	66818	2943	1	852193	NM_001178325	-216	BOI1	Boi1p	protein_coding	NP_009468.1	YBL085W
chrIX	183127	183870	744	745	183508	803	328.158	5.78943	326.149	Promoter (<=1kb)	182117	183127	1011	2	854711	NM_001179444	0	BMT5	25S rRNA (uracil2634-N3)-methyltransferase	protein_coding	NP_012170.1	YIL096C
chrM	35818	36691	874	875	35892	147	4.07109	1.37588	2.84908	Promoter (<=1kb)	36540	42251	5712	1	854582	gene-Q0120	0	BI4	intron-encoded RNA maturase bI4	protein_coding	NP_009316.1	Q0120
chrXII	921428	922476	1049	1050	921725	233	13.2142	1.68498	11.9102	Promoter (<=1kb)	919536	921596	2061	2	851115	NM_001182287	0	BDF1	chromatin-binding protein BDF1	protein_coding	NP_013503.1	YLR399C
chrVIII	516942	519003	2062	2063	517560	360	55.4749	2.59948	53.9265	Promoter (<=1kb)	517532	518713	1182	1	856615	NM_001179339	0	BAT1	branched-chain-amino-acid transaminase BAT1	protein_coding	NP_012078.3	YHR208W
chrIV	550899	551402	504	505	551009	179	3.47167	1.29614	2.3195	Promoter (<=1kb)	548762	550576	1815	2	851616	NM_001180354	-323	BAP3	amino acid transporter BAP3	protein_coding	NP_010331.3	YDR046C
chrII	373244	376627	3384	3385	373702	277	25.1392	2.00182	23.734	Promoter (<=1kb)	373861	375690	1830	2	852360	NM_001178416	0	BAP2	branched-chain amino acid permease BAP2	protein_coding	NP_009624.4	YBR068C
chrX	435953	436746	794	795	436282	477	100.074	3.17331	98.3947	Promoter (<=1kb)	436802	438610	1809	1	853457	NM_001181658	-56	AVT1	Avt1p	protein_coding	NP_012534.1	YJR001W
chrM	28059	28334	276	277	28209	173	7.579	1.54702	6.28098	Promoter (<=1kb)	28487	29266	780	1	854601	gene-Q0085	-153	ATP6	F1F0 ATP synthase subunit a	protein_coding	NP_009313.1	Q0085
chrXVI	74287	77204	2918	2919	74614	224	11.1899	1.62018	9.9084	Promoter (<=1kb)	74309	74719	411	2	855825	NM_001184064	0	ATG41	Atg41p	protein_coding	NP_015073.1	YPL250C
chrIV	488372	489413	1042	1043	488860	1116	591.512	8.04328	589.215	Promoter (<=1kb)	488072	488662	591	2	851585	NM_001180330	0	ATG31	Atg31p	protein_coding	NP_010305.1	YDR022C
chrX	89556	91818	2263	2264	90264	2293	1866.89	16.5186	1863.83	Promoter (<=1kb)	89282	90097	816	2	853261	NM_001181611	0	ATG27	Atg27p	protein_coding	NP_012357.2	YJL178C
chrXV	167699	168622	924	925	168078	473	108.621	3.38555	106.922	Promoter (<=1kb)	168727	169974	1248	1	854072	NM_001183336	-105	ATG19	Atg19p	protein_coding	NP_014559.1	YOL082W
chrV	361581	363304	1724	1725	362396	2279	1849.81	16.4178	1846.76	Promoter (<=1kb)	360502	361794	1293	2	856838	NM_001178992	0	AST2	Ast2p	protein_coding	NP_011027.1	YER101C
chrXIII	499122	501353	2232	2233	499562	311	36.4308	2.24665	34.9626	Promoter (<=1kb)	499456	500688	1233	2	855143	NM_001182616	0	ASC1	guanine nucleotide-binding protein subunit beta	protein_coding	NP_013834.1	YMR116C
chrVIII	375383	375911	529	530	375566	234	13.4484	1.69218	12.1419	Promoter (<=1kb)	375709	377250	1542	1	856539	NM_001179267	0	ARO9	aromatic-amino-acid:2-oxoglutarate transaminase	protein_coding	NP_012005.1	YHR137W
chrII	717852	718224	373	374	717947	177	3.22873	1.28174	2.08298	Promoter (<=1kb)	716882	717994	1113	2	852551	NM_001178597	0	ARO4	3-deoxy-7-phosphoheptulonate synthase ARO4	protein_coding	NP_009808.1	YBR249C
chrIV	703813	704404	592	593	703905	181	3.72355	1.31054	2.56493	Promoter (<=1kb)	704484	709250	4767	1	851705	NM_001180435	-80	ARO1	pentafunctional protein ARO1p	protein_coding	NP_010412.1	YDR127W
chrXV	58343	58720	378	379	58506	214	9.11983	1.54817	7.86427	Promoter (<=1kb)	58759	60030	1272	1	854025	NM_001183394	-39	ARG8	acetylornithine transaminase	protein_coding	NP_014501.1	YOL140W
chrVIII	139876	140284	409	410	139966	179	3.47167	1.29614	2.3195	Promoter (1-2kb)	140011	141402	1392	2	856411	NM_001179148	1118	ARG4	argininosuccinate lyase ARG4	protein_coding	NP_011882.1	YHR018C
chrVIII	140582	141834	1253	1254	140775	204	7.24572	1.47616	6.01785	Promoter (<=1kb)	140011	141402	1392	2	856411	NM_001179148	0	ARG4	argininosuccinate lyase ARG4	protein_coding	NP_011882.1	YHR018C
chrXV	218705	219340	636	637	218782	171	2.5543	1.23854	1.42871	Promoter (<=1kb)	219211	220473	1263	1	854096	NM_001183313	0	ARG1	argininosuccinate synthase	protein_coding	NP_014583.2	YOL058W
chrIV	215699	215991	293	294	215830	202	6.89515	1.46176	5.67288	Promoter (<=1kb)	216529	217074	546	1	851418	NM_001180197	-538	ARF2	Arf family GTPase ARF2	protein_coding	NP_010144.1	YDL137W
chrIV	116071	118768	2698	2699	116326	271	23.3261	1.95861	21.9335	Promoter (<=1kb)	116321	116866	546	1	851335	NM_001180252	0	ARF1	Arf family GTPase ARF1	protein_coding	NP_010089.1	YDL192W
chrV	225148	225843	696	697	225544	499	124.084	3.60039	122.35	Promoter (<=1kb)	223367	225199	1833	2	856758	NM_001178927	0	ARB1	ATP-binding cassette family ATPase ARB1	protein_coding	NP_010953.1	YER036C
chrXIII	351901	352905	1005	1006	352289	882	390.316	6.35829	388.233	Promoter (<=1kb)	350966	351973	1008	2	855057	NM_001182538	0	ARA2	D-arabinose 1-dehydrogenase (NAD(P)(+)) ARA2	protein_coding	NP_013755.1	YMR041C
chrXIV	503262	503609	348	349	503373	181	3.72355	1.31054	2.56493	Promoter (<=1kb)	503724	505484	1761	1	855660	NM_001182903	-115	AQR1	Aqr1p	protein_coding	NP_014334.3	YNL065W
chrX	396320	397257	938	939	396784	996	485.357	7.17918	483.169	Promoter (<=1kb)	395931	396592	662	2	853429	NM_001181458	0	APS3	Aps3p	protein_coding	NP_012510.3	YJL024C
chrII	556045	556477	433	434	556244	184	4.11821	1.33215	2.95001	Promoter (<=1kb)	556549	558198	1650	1	852455	NM_001178506	-72	AMN1	Amn1p	protein_coding	NP_009716.1	YBR158W
chrVI	180497	181530	1034	1035	181033	1452	916.891	10.4627	914.351	Promoter (<=1kb)	177042	180743	3702	2	850570	NM_001179981	0	AIP5	Aip5p	protein_coding	NP_116671.1	YFR016C
chrX	165632	166329	698	699	165787	118	3.88513	1.41312	2.66814	Promoter (<=1kb)	164278	165348	1071	2	853310	NM_001181564	-284	AIM23	Aim23p	protein_coding	NP_012404.1	YJL131C
chrM	12266	12799	534	535	12377	746	5.92961	1.19328	4.72517	Promoter (1-2kb)	13818	16322	2505	1	854593	gene-Q0050	-1019	AI1	intron-encoded reverse transcriptase aI1	protein_coding	NP_009310.1	Q0050
chrIII	77520	78812	1293	1294	78443	559	159.199	4.03244	157.404	Promoter (<=1kb)	76018	77919	1902	2	850333	NM_001178671	0	AGP1	amino acid transporter AGP1	protein_coding	NP_009905.3	YCL025C
chrVII	371118	371494	377	378	371330	306	34.6659	2.21064	33.2062	Promoter (<=1kb)	372012	374084	2073	1	852809	NM_001180936	-518	AFT1	DNA-binding transcription factor AFT1	protein_coding	NP_011444.1	YGL071W
chrVI	54715	55139	425	426	54977	177	3.22873	1.28174	2.08298	Promoter (<=1kb)	53260	54696	1437	2	850504	NM_001179927	-19	ACT1	actin	protein_coding	NP_116614.1	YFL039C
chrX	58631	59592	962	963	59191	864	375.873	6.22868	373.807	Promoter (<=1kb)	56444	58813	2370	2	853230	NM_001181633	0	ACO2	aconitate hydratase ACO2	protein_coding	NP_012335.1	YJL200C
chrXII	737709	738077	369	370	737883	293	26.7912	2.01088	25.3756	Promoter (<=1kb)	735212	737548	2337	2	851013	NM_001182192	-161	ACO1	aconitate hydratase ACO1	protein_coding	NP_013407.1	YLR304C
chrXII	198031	199801	1771	1772	198765	671	232.006	4.83893	230.11	Promoter (<=1kb)	196829	198085	1257	2	850714	NM_001181914	0	AAT2	aspartate transaminase AAT2	protein_coding	NP_013127.2	YLR027C
chrII	87668	88441	774	775	88039	544	150.147	3.92443	148.366	Promoter (<=1kb)	86722	87789	1068	2	852205	NM_001178314	0	AAR2	U5 snRNP complex subunit AAR2	protein_coding	NP_009479.1	YBL074C
chrM	56630	56922	293	294	56767	930	53.3179	1.73482	51.7778	Promoter (1-2kb)	58009	62447	4439	1	9164988	rna-Q0158	-1087	21S_RRNA	21S ribosomal RNA	rRNA	.	Q0158
chrM	57664	57965	302	303	57833	1375	119.051	2.01016	117.329	Promoter (<=1kb)	58009	62447	4439	1	9164988	rna-Q0158	-44	21S_RRNA	21S ribosomal RNA	rRNA	.	Q0158
chrM	54466	54964	499	500	54723	533	9.51846	1.3212	8.25763	Distal Intergenic	58009	62447	4439	1	9164988	rna-Q0158	-3045	21S_RRNA	21S ribosomal RNA	rRNA	.	Q0158
chrM	4050	4706	657	658	4159	608	12.327	1.35298	11.0326	Promoter (1-2kb)	6546	8194	1649	1	9164990	rna-Q0020	-1840	15S_RRNA	15S ribosomal RNA	rRNA	.	Q0020
chrM	6018	6727	710	711	6184	1131	150.079	2.43469	148.299	Promoter (<=1kb)	6546	8194	1649	1	9164990	rna-Q0020	0	15S_RRNA	15S ribosomal RNA	rRNA	.	Q0020
chrXVI	859880	860854	975	976	860391	995	484.497	7.17198	482.31	Promoter (<=1kb)	860314	860415	102	2	1466523	NM_001184628	0	.	uncharacterized protein	protein_coding	NP_878184.1	YPR159C-A
chrXVI	743817	744808	992	993	744283	1218	686.175	8.77776	683.79	Promoter (<=1kb)	744175	744387	213	1	1466522	NM_001184581	0	.	uncharacterized protein	protein_coding	NP_878183.1	YPR108W-A
chrXV	908032	908824	793	794	908273	223	10.9743	1.61298	9.69532	Promoter (<=1kb)	907726	907935	210	2	1466487	NM_001184577	-97	.	uncharacterized protein	protein_coding	NP_878175.1	YOR316C-A
chrXV	866023	868156	2134	2135	866771	2404	2003.59	17.3179	2000.46	Promoter (<=1kb)	867998	868147	150	2	1466486	NM_001184669	0	.	uncharacterized protein	protein_coding	NP_878174.3	YOR293C-A
chrXV	638968	639617	650	651	639302	283	27.0078	2.04502	25.5902	Promoter (<=1kb)	639121	639267	147	2	1466484	NM_001184625	0	.	uncharacterized protein	protein_coding	NP_878172.1	YOR161C-C
chrXV	463994	464964	971	972	464455	1226	693.76	8.83536	691.368	Promoter (<=1kb)	464469	464630	162	1	1466483	NM_001184526	0	.	uncharacterized protein	protein_coding	NP_878171.1	YOR072W-B
chrXV	300636	301529	894	895	301115	965	458.923	6.95596	456.764	Promoter (<=1kb)	301047	301238	192	1	854147	NM_001184640	0	.	uncharacterized protein	protein_coding	NP_878166.1	YOL013W-A
chrXV	287585	288716	1132	1133	288211	1127	601.533	8.12249	599.225	Promoter (<=1kb)	288420	288572	153	1	1466477	NM_001184622	0	.	uncharacterized protein	protein_coding	NP_878165.1	YOL019W-A
chrXV	28661	29153	493	494	28866	350	27.3882	1.90018	25.9687	Promoter (1-2kb)	27084	27218	135	1	1466474	NM_001184666	1577	.	uncharacterized protein	protein_coding	NP_878162.1	YOL155W-A
chrXV	128	1073	946	947	524	484	115.779	3.49238	114.063	Promoter (<=1kb)	585	740	156	1	1466472	NM_001184623	0	.	uncharacterized protein	protein_coding	NP_878160.1	YOL166W-A
chrXIV	546525	547664	1140	1141	547112	1258	724.326	9.06579	721.911	Promoter (<=1kb)	547113	547370	258	1	1466515	NM_001184662	0	.	uncharacterized protein	protein_coding	NP_878157.3	YNL042W-B
chrXIV	498844	502803	3960	3961	499670	690	245.2	4.97574	243.288	Promoter (<=1kb)	499417	499557	141	1	1466514	NM_001184639	0	.	uncharacterized protein	protein_coding	NP_878156.3	YNL067W-B
chrXIII	753018	755463	2446	2447	753183	192	5.26694	1.38975	4.07434	Promoter (<=1kb)	754297	754386	90	1	1466505	NM_001184616	0	.	uncharacterized protein	protein_coding	NP_878147.1	YMR242W-A
chrXIII	731615	733317	1703	1704	732228	1206	671.78	8.63466	669.408	Promoter (<=1kb)	733268	733456	189	1	1466504	NM_001184573	0	.	uncharacterized protein	protein_coding	NP_878146.1	YMR230W-A
chrXII	930601	933079	2479	2480	931213	286	27.9626	2.06663	26.5392	Promoter (<=1kb)	932206	932355	150	2	1466423	NM_001184610	0	.	uncharacterized protein	protein_coding	NP_878135.1	YLR406C-A
chrXII	809677	816162	6486	6487	809829	213	4.65973	1.33441	3.48177	Promoter (<=1kb)	815810	815983	174	1	1466421	NM_001184569	0	.	uncharacterized protein	protein_coding	NP_878133.1	YLR342W-A
chrXII	673576	674463	888	889	673764	240	14.8907	1.73539	13.5695	Promoter (<=1kb)	673828	673944	117	2	1466417	NM_001184638	0	.	uncharacterized protein	protein_coding	NP_878129.1	YLR264C-A
chrXII	468650	469093	444	445	468868	856	369.506	6.17107	367.447	Promoter (<=1kb)	468827	468958	132	2	1466410	NM_001184564	0	.	uncharacterized protein	protein_coding	NP_878126.1	YLR154C-H
chrXII	5547	6017	471	472	5769	522	137.196	3.76601	135.437	Promoter (<=1kb)	5605	5775	171	1	1466404	NM_001184605	0	.	uncharacterized protein	protein_coding	NP_878115.1	YLL066W-B
chrXI	309136	309579	444	445	309500	186	4.39231	1.34655	3.21792	Promoter (<=1kb)	309206	309442	237	1	1500487	NM_001184534	0	.	uncharacterized protein	protein_coding	NP_878111.1	YKL068W-A
chrXI	258923	259875	953	954	259204	266	21.8585	1.92261	20.4768	Promoter (<=1kb)	259073	259222	150	2	1500486	NM_001184604	0	.	uncharacterized protein	protein_coding	NP_878110.1	YKL096C-B
chrX	348920	349580	661	662	349343	317	38.5943	2.28985	37.1158	Promoter (<=1kb)	349044	349178	135	2	1466468	NM_001184635	0	.	uncharacterized protein	protein_coding	NP_878105.1	YJL047C-A
chrIX	96542	97469	928	929	96842	318	38.9596	2.29705	37.4794	Promoter (<=1kb)	96522	96725	204	2	1466491	NM_001184555	0	.	uncharacterized protein	protein_coding	NP_878096.1	YIL134C-A
chrVIII	122114	122622	509	510	122409	205	7.4241	1.48336	6.19346	Promoter (<=1kb)	122550	122765	216	2	1466526	NM_001184651	143	.	uncharacterized protein	protein_coding	NP_878086.1	YHR007C-A
chrVIII	5212	5609	398	399	5293	188	4.67516	1.36095	3.4946	Promoter (<=1kb)	5663	5797	135	2	1466524	NM_001184650	188	.	uncharacterized protein	protein_coding	NP_878084.1	YHL048C-A
chrVII	484813	485447	635	636	485129	281	25.5039	2.00263	24.0966	Promoter (<=1kb)	485423	485533	111	1	1466456	NM_001184634	0	.	uncharacterized protein	protein_coding	NP_878076.1	YGL006W-A
chrVII	475768	483767	8000	8001	476146	479	87.4379	2.89323	85.7911	Promoter (<=1kb)	482941	483027	87	2	1466455	NM_001184592	0	.	uncharacterized protein	protein_coding	NP_878075.3	YGL007C-A
chrVII	147946	150203	2258	2259	149298	3262	3128.72	23.4962	3125.04	Promoter (<=1kb)	148824	148964	141	2	1466453	NM_001184593	0	.	uncharacterized protein	protein_coding	NP_878073.3	YGL188C-A
chrV	569362	570032	671	672	569651	270	23.0294	1.95141	21.6389	Promoter (<=1kb)	569608	569907	300	2	1466538	NM_001184633	0	.	uncharacterized protein	protein_coding	NP_878070.1	YER188C-A
chrIV	1489050	1490390	1341	1342	1489670	509	129.73	3.6724	127.985	Promoter (<=1kb)	1489403	1489492	90	1	1466437	NM_001184632	0	.	uncharacterized protein	protein_coding	NP_878066.3	YDR524W-C
chrIII	315641	316004	364	365	315823	295	30.9073	2.13143	29.4668	Promoter (<=1kb)	315997	316188	192	2	1466400	NM_001184543	184	.	uncharacterized protein	protein_coding	NP_878059.1	YCR108C
chrII	612021	614980	2960	2961	612354	206	7.60447	1.49056	6.37107	Promoter (<=1kb)	614024	614173	150	2	1466447	NM_001184541	0	.	uncharacterized protein	protein_coding	NP_878051.3	YBR196C-A
chrII	88905	90523	1619	1620	89745	1474	939.469	10.6212	936.913	Promoter (<=1kb)	89458	89556	99	2	1466440	NM_001184584	0	.	uncharacterized protein	protein_coding	NP_878044.1	YBL071C-B
chrI	70945	73787	2843	2844	71708	803	328.158	5.78943	326.149	Promoter (<=1kb)	73426	73518	93	2	1466428	NM_001184629	0	.	uncharacterized protein	protein_coding	NP_878040.1	YAL037C-A
chrVI	269495	270072	578	579	269885	308	35.3677	2.22504	33.9046	Promoter (<=1kb)	269061	269516	456	1	850618	NM_001180022	434	.	uncharacterized protein	protein_coding	NP_116715.3	YFR057W
chrVI	226329	227119	791	792	226745	790	318.244	5.69582	316.247	Promoter (<=1kb)	226121	226465	345	2	850595	NM_001180000	0	.	uncharacterized protein	protein_coding	NP_116693.3	YFR035C
chrXIV	330261	332535	2275	2276	331006	1671	1088.56	11.019	1085.91	Promoter (<=1kb)	330329	330547	219	1	855559	NM_001184490	0	.	uncharacterized protein	protein_coding	NP_076906.1	YNL162W-A
chrIII	114133	114764	632	633	114456	403	56.2678	2.46806	54.7176	Promoter (<=1kb)	113770	114024	255	1	850356	NM_001184462	363	.	uncharacterized protein	protein_coding	NP_076878.1	YCL001W-B
chrXVI	942264	942653	390	391	942457	227	11.8481	1.64178	10.5588	Promoter (<=1kb)	943032	943896	865	1	856332	NM_001184299	-379	.	uncharacterized protein	protein_coding	NP_015528.1	YPR202W
chrXVI	172506	173918	1413	1414	172976	679	237.534	4.89653	235.63	Promoter (<=1kb)	172033	172755	723	2	855902	NM_001184013	0	.	uncharacterized protein	protein_coding	NP_015125.1	YPL199C
chrXV	882249	882587	339	340	882538	199	6.3847	1.44016	5.17132	Promoter (<=1kb)	882765	882842	78	1	854478	NM_001183721	-178	.	uncharacterized protein	protein_coding	NP_014946.1	YOR302W
chrXIV	569510	570260	751	752	569948	807	331.227	5.81823	329.214	Promoter (<=1kb)	568522	569691	1170	2	855695	NM_001182874	0	.	uncharacterized protein	protein_coding	NP_014363.1	YNL035C
chrXIV	282829	283381	553	554	283174	203	7.06941	1.46896	5.84433	Promoter (<=1kb)	282395	283009	615	1	855531	NM_001183028	434	.	uncharacterized protein	protein_coding	NP_014209.1	YNL190W
chrXIV	253324	254163	840	841	253398	170	2.4499	1.23133	1.3278	Promoter (<=1kb)	254418	255017	600	1	855513	NM_001183046	-255	.	uncharacterized protein	protein_coding	NP_014191.2	YNL208W
chrXII	1063961	1065386	1426	1427	1064499	449	97.1915	3.24035	95.5192	Promoter (<=1kb)	1065956	1066564	609	1	851184	NM_001182350	-570	.	uncharacterized protein	protein_coding	NP_013567.3	YLR462W
chrXII	489185	489963	779	780	489456	1114	589.695	8.02888	587.399	Promoter (<=1kb)	489573	489929	357	1	850859	NM_001182049	0	.	uncharacterized protein	protein_coding	NP_013263.1	YLR162W
chrXII	150720	151974	1255	1256	150812	207	7.78689	1.49776	6.55074	Promoter (2-3kb)	151389	153977	2589	2	850687	NM_001181888	2003	.	uncharacterized protein	protein_coding	NP_013101.1	YLR001C
chrXII	11089	12093	1005	1006	11829	579	171.54	4.17646	169.725	Promoter (1-2kb)	6120	9836	3717	2	850660	NM_001181886	-1253	.	Y' element ATP-dependent helicase	protein_coding	NP_013034.1	YLL066C
chrXII	23	402	380	381	179	952	447.966	6.86235	445.819	Downstream (<1kb)	585	4301	3717	2	850659	NM_001181887	3899	.	Y' element ATP-dependent helicase	protein_coding	NP_013033.1	YLL067C
chrIX	174661	175505	845	846	175051	872	382.272	6.28629	380.199	Promoter (<=1kb)	174582	174887	306	2	854704	NM_001179450	0	.	uncharacterized protein	protein_coding	NP_012164.1	YIL102C
chrVIII	556008	557006	999	1000	556789	373	61.0265	2.69309	59.459	Promoter (1-2kb)	558014	559924	1911	1	856628	NM_001179349	-1008	.	uncharacterized protein	protein_coding	NP_012090.1	YHR218W
chrVII	725887	727183	1297	1298	726417	510	130.299	3.6796	128.553	Promoter (<=1kb)	725049	726479	1431	2	853014	NM_001181246	0	.	uncharacterized protein	protein_coding	NP_011632.3	YGR117C
chrV	441477	443649	2173	2174	442100	1740	1223.15	12.5366	1220.42	Promoter (<=1kb)	441373	441819	447	2	856877	NM_001179027	0	.	uncharacterized protein	protein_coding	NP_011063.3	YER137C
chrIV	125239	125651	413	414	125429	229	12.2961	1.65618	11.0017	Promoter (<=1kb)	125616	126449	834	1	851340	NM_001180246	0	.	uncharacterized protein	protein_coding	NP_010095.1	YDL186W
chrIII	10969	11676	708	709	11268	611	170.562	3.96956	168.75	Promoter (<=1kb)	11503	12285	783	2	850291	NM_001178709	609	.	uncharacterized protein	protein_coding	NP_009865.2	YCL068C
chrII	167533	169607	2075	2076	168132	1134	607.934	8.17289	605.62	Promoter (<=1kb)	167518	167838	321	2	852253	NM_001178268	0	.	uncharacterized protein	protein_coding	NP_009525.1	YBL028C
chrXIII	549996	553307	3312	3313	550402	245	16.1414	1.77139	14.808	Promoter (<=1kb)	549736	550044	309	2	855172	NM_001348868	0	.	uncharacterized protein	protein_coding	NP_001335808.1	YMR141C
chrVII	828294	829245	952	953	828784	889	395.976	6.4087	393.887	Promoter (<=1kb)	828625	828960	336	1	853073	NM_001348843	0	.	uncharacterized protein	protein_coding	NP_001335783.1	YGR164W
chrVII	345410	346557	1148	1149	345978	717	264.339	5.17016	262.404	Promoter (<=1kb)	345836	346201	366	1	852792	NM_001348836	0	.	uncharacterized protein	protein_coding	NP_001335777.1	YGL088W
chrV	438241	439309	1069	1070	438711	1167	638.36	8.41052	636.018	Promoter (<=1kb)	437952	438344	393	2	856874	NM_001348826	0	.	uncharacterized protein	protein_coding	NP_001335768.1	YER135C
chrIV	769783	770603	821	822	769980	189	4.81986	1.36815	3.63622	Promoter (<=1kb)	769931	770332	402	1	851735	NM_001348811	0	.	uncharacterized protein	protein_coding	NP_001335757.1	YDR157W
chrII	642427	643223	797	798	643021	441	93.1057	3.18275	91.4436	Promoter (<=1kb)	642583	642900	318	1	852508	NM_001348891	0	.	uncharacterized protein	protein_coding	NP_001335746.1	YBR209W
chrII	301150	301463	314	315	301282	235	13.6843	1.69939	12.3753	Promoter (<=1kb)	301519	301821	303	1	852320	NM_001346796	-56	.	uncharacterized protein	protein_coding	NP_001333725.1	YBR032W
chrIX	394718	395063	346	347	394909	209	8.15779	1.51216	6.91598	Promoter (<=1kb)	394255	394557	303	2	854837	NM_001270752	-161	.	uncharacterized protein	protein_coding	NP_001257681.1	YIR020C
chrIV	409966	410736	771	772	410394	879	387.898	6.33669	385.818	Promoter (<=1kb)	409808	410056	249	2	13393611	NM_001270741	0	.	uncharacterized protein	protein_coding	NP_001257670.1	YDL022C-A
chrVIII	450701	453141	2441	2442	451342	642	212.319	4.63011	210.448	Promoter (<=1kb)	450815	451153	339	2	856578	NM_001270738	0	.	uncharacterized protein	protein_coding	NP_001257667.1	YHR173C
chrM	32917	33185	269	270	33063	678	76.6858	2.2401	75.0691	Promoter (2-3kb)	35373	35444	72	1	854603	rna-tE(UUC)Q	-2188	.	tRNA-Glu	tRNA	.	tE(UUC)Q
chrM	2487	3217	731	732	2717	951	69.9433	1.88511	68.3481	Promoter (1-2kb)	731	802	72	1	854578	rna-tP(UGG)Q	1756	.	tRNA-Pro	tRNA	.	tP(UGG)Q
chrM	82356	83454	1099	1100	82428	335	2.44122	1.15925	1.32205	Promoter (1-2kb)	85035	85112	78	1	854628	rna-tM(CAU)Q2	-1581	.	tRNA-Met	tRNA	.	tM(CAU)Q2
chrI	182169	183032	864	865	182630	637	208.981	4.5941	207.114	Promoter (<=1kb)	182522	182603	82	2	851278	rna-tS(AGA)A	0	.	tRNA-Ser	tRNA	.	tS(AGA)A
chrII	9052	10222	1171	1172	9576	1850	1345.79	13.3286	1342.99	Promoter (<=1kb)	9583	9666	84	1	852166	rna-tL(UAA)B1	0	.	tRNA-Leu	tRNA	.	tL(UAA)B1
chrII	36041	36936	896	897	36412	1220	688.069	8.79216	685.682	Promoter (<=1kb)	36398	36488	91	1	852176	rna-tF(GAA)B	0	.	tRNA-Phe	tRNA	.	tF(GAA)B
chrII	197061	198336	1276	1277	197642	1770	1256.3	12.7526	1253.56	Promoter (<=1kb)	197494	197567	74	1	852267	rna-tI(AAU)B	0	.	tRNA-Ile	tRNA	.	tI(AAU)B
chrII	226771	227701	931	932	227079	1366	830.044	9.84347	827.557	Promoter (<=1kb)	227075	227156	82	1	852281	rna-tS(AGA)B	0	.	tRNA-Ser	tRNA	.	tS(AGA)B
chrII	326370	327260	891	892	326857	1015	501.765	7.316	499.559	Promoter (<=1kb)	326792	326865	74	2	852333	rna-tV(UAC)B	0	.	tRNA-Val	tRNA	.	tV(UAC)B
chrII	405399	406422	1024	1025	405915	1150	622.635	8.2881	620.307	Promoter (<=1kb)	405878	405949	72	1	852374	rna-tR(UCU)B	0	.	tRNA-Arg	tRNA	.	tR(UCU)B
chrII	644616	645686	1071	1072	645194	1049	531.511	7.56082	529.275	Promoter (<=1kb)	645167	645238	72	1	852510	rna-tE(UUC)B	0	.	tRNA-Glu	tRNA	.	tE(UUC)B
chrII	680489	681832	1344	1345	680981	279	25.7559	2.01622	24.3465	Promoter (<=1kb)	680688	681862	1175	2	9164871	NR_132154	30	.	LSR1	snRNA	.	LSR1
chrIII	327	2777	2451	2452	621	689	244.5	4.96854	242.589	Promoter (<=1kb)	2126	2566	441	1	850287	rna-YCL075W	0	.	.	pseudogene	.	YCL075W
chrIII	3700	4090	391	392	3945	207	7.78088	1.49748	6.547	Promoter (<=1kb)	2824	3750	927	1	850288	rna-YCL074W	876	.	.	pseudogene	.	YCL074W
chrIII	81977	82936	960	961	82556	1808	1298.62	13.0262	1295.85	Promoter (<=1kb)	82462	82533	72	2	850337	rna-tE(UUC)C	0	.	tRNA-Glu	tRNA	.	tE(UUC)C
chrIII	107201	107929	729	730	107689	257	19.3184	1.8578	17.9567	Promoter (<=1kb)	107504	107712	209	2	9164875	NR_132155	0	.	SNR43	snoRNA	.	snR43
chrIII	127322	128106	785	786	127705	853	367.127	6.14947	365.071	Promoter (<=1kb)	127716	127789	74	1	850365	rna-tN(GUU)C	0	.	tRNA-Asn	tRNA	.	tN(GUU)C
chrIII	295290	295939	650	651	295542	660	224.473	4.75972	222.587	Promoter (<=1kb)	295484	295556	73	1	850461	rna-tT(AGU)C	0	.	tRNA-Thr	tRNA	.	tT(AGU)C
chrIV	83103	84052	950	951	83551	1080	559.05	7.78405	556.787	Promoter (<=1kb)	83548	83618	71	1	851316	rna-tG(GCC)D1	0	.	tRNA-Gly	tRNA	.	tG(GCC)D1
chrIV	359168	360053	886	887	359599	1061	542.125	7.64723	539.878	Promoter (<=1kb)	359577	359672	96	1	851505	rna-tK(UUU)D	0	.	tRNA-Lys	tRNA	.	tK(UUU)D
chrIV	433780	434761	982	983	434304	975	467.404	7.02797	465.235	Promoter (<=1kb)	434264	434336	73	2	851555	rna-tT(AGU)D	0	.	tRNA-Thr	tRNA	.	tT(AGU)D
chrIV	437569	438271	703	704	437817	1017	503.501	7.3304	501.293	Promoter (<=1kb)	437772	437853	82	1	851556	rna-tS(AGA)D1	0	.	tRNA-Ser	tRNA	.	tS(AGA)D1
chrIV	519441	521489	2049	2050	519751	1070	550.124	7.71204	547.87	Promoter (<=1kb)	519743	519826	84	1	851601	rna-tL(UAA)D	0	.	tRNA-Leu	tRNA	.	tL(UAA)D
chrIV	541279	542284	1006	1007	541825	601	185.458	4.33487	183.624	Promoter (<=1kb)	541602	541700	99	2	9164877	NR_132160	0	.	SNR47	snoRNA	.	snR47
chrIV	667524	668690	1167	1168	667871	408	76.9255	2.94512	75.3075	Promoter (<=1kb)	668007	668080	74	2	851684	rna-tI(AAU)D	0	.	tRNA-Ile	tRNA	.	tI(AAU)D
chrIV	884041	884948	908	909	884411	1212	680.5	8.73455	678.121	Promoter (<=1kb)	884361	884493	133	1	851796	rna-tI(UAU)D	0	.	tRNA-Ile	tRNA	.	tI(UAU)D
chrIV	980494	981369	876	877	981034	1234	701.368	8.89297	698.97	Promoter (<=1kb)	980974	981055	82	2	851849	rna-tS(AGA)D2	0	.	tRNA-Ser	tRNA	.	tS(AGA)D2
chrIV	992444	993415	972	973	992815	1370	834.032	9.87228	831.543	Promoter (<=1kb)	992832	992902	71	1	851854	rna-tG(GCC)D2	0	.	tRNA-Gly	tRNA	.	tG(GCC)D2
chrIV	1016813	1017701	889	890	1017259	1021	506.979	7.3592	504.768	Promoter (<=1kb)	1017207	1017278	72	2	851871	rna-tE(CUC)D	0	.	tRNA-Glu	tRNA	.	tE(CUC)D
chrIV	1094878	1095447	570	571	1095273	515	133.158	3.71561	131.406	Promoter (<=1kb)	1095370	1095461	92	2	851912	rna-tF(GAA)D	14	.	tRNA-Phe	tRNA	.	tF(GAA)D
chrIV	1201273	1202391	1119	1120	1201777	1226	693.76	8.83536	691.368	Promoter (<=1kb)	1201750	1201822	73	1	851966	rna-tK(CUU)D1	0	.	tRNA-Lys	tRNA	.	tK(CUU)D1
chrIV	1305119	1306146	1028	1029	1305576	654	220.398	4.71651	218.517	Promoter (<=1kb)	1305630	1305712	83	1	852029	rna-tS(AGA)D3	0	.	tRNA-Ser	tRNA	.	tS(AGA)D3
chrIV	1352056	1352852	797	798	1352525	922	422.976	6.64633	420.857	Promoter (<=1kb)	1352466	1352538	73	2	852055	rna-tK(CUU)D2	0	.	tRNA-Lys	tRNA	.	tK(CUU)D2
chrIX	197221	198021	801	802	197590	859	371.89	6.19268	369.828	Promoter (<=1kb)	197592	197663	72	1	854720	rna-tE(CUC)I	0	.	tRNA-Glu	tRNA	.	tE(CUC)I
chrIX	210414	211145	732	733	210680	1027	512.209	7.40241	509.991	Promoter (<=1kb)	210665	210738	74	1	854730	rna-tI(AAU)I2	0	.	tRNA-Ile	tRNA	.	tI(AAU)I2
chrIX	369989	370888	900	901	370435	988	478.494	7.12158	476.314	Promoter (<=1kb)	370417	370488	72	1	854823	rna-tE(UUC)I	0	.	tRNA-Glu	tRNA	.	tE(UUC)I
chrIX	438625	439790	1166	1167	439315	377	62.7742	2.7219	61.2008	Promoter (<=1kb)	437043	438179	1137	2	854861	gene-YIR043C	-446	.	.	pseudogene	.	YIR043C
chrM	64	1014	951	952	171	361	24.9936	1.81961	23.5902	Promoter (<=1kb)	731	802	72	1	854578	rna-tP(UGG)Q	0	.	tRNA-Pro	tRNA	.	tP(UGG)Q
chrM	7995	8432	438	439	8249	1652	301.298	2.9286	299.32	Promoter (<=1kb)	9374	9447	74	1	854581	rna-tW(UCA)Q	-942	.	tRNA-Trp	tRNA	.	tW(UCA)Q
chrM	8920	9676	757	758	9052	1165	94.9811	1.96153	93.3149	Promoter (<=1kb)	9374	9447	74	1	854581	rna-tW(UCA)Q	0	.	tRNA-Trp	tRNA	.	tW(UCA)Q
chrM	10268	11638	1371	1372	10417	1087	108.44	2.12749	106.742	Promoter (<=1kb)	9374	9447	74	1	854581	rna-tW(UCA)Q	894	.	tRNA-Trp	tRNA	.	tW(UCA)Q
chrM	47357	48441	1085	1086	47479	951	105.62	2.22914	103.928	Promoter (<=1kb)	48201	48290	90	1	854585	rna-tS(UGA)Q2	0	.	tRNA-Ser	tRNA	.	tS(UGA)Q2
chrM	62430	63035	606	607	62602	1484	121.084	1.96539	119.357	Promoter (<=1kb)	63862	63937	76	1	854591	rna-tT(UGU)Q1	-827	.	tRNA-Thr	tRNA	.	tT(UGU)Q1
chrM	63688	64003	316	317	63880	1112	67.9126	1.7725	66.3236	Promoter (<=1kb)	63862	63937	76	1	854591	rna-tT(UGU)Q1	0	.	tRNA-Thr	tRNA	.	tT(UGU)Q1
chrM	64414	64680	267	268	64546	969	33.9551	1.52028	32.5001	Promoter (<=1kb)	64415	64490	76	1	854606	rna-tC(GCA)Q	0	.	tRNA-Cys	tRNA	.	tC(GCA)Q
chrM	65638	66227	590	591	65943	1168	44.598	1.55445	43.0931	Promoter (<=1kb)	66095	66179	85	1	854609	rna-tL(UAA)Q	0	.	tRNA-Leu	tRNA	.	tL(UAA)Q
chrM	66752	71528	4777	4778	67455	1416	238.813	2.78756	236.909	Promoter (<=1kb)	67061	67134	74	1	854611	rna-tK(UUU)Q	0	.	tRNA-Lys	tRNA	.	tK(UUU)Q
chrM	72665	73561	897	898	72826	752	32.2037	1.593	30.7575	Promoter (<=1kb)	72630	72705	76	1	854621	rna-tM(CAU)Q1	35	.	tRNA-Met	tRNA	.	tM(CAU)Q1
chrM	76287	78077	1791	1792	77010	1267	206.566	2.7298	204.703	Promoter (<=1kb)	77431	77505	75	1	854624	rna-tF(GAA)Q	0	.	tRNA-Phe	tRNA	.	tF(GAA)Q
chrM	83727	84133	407	408	83931	778	84.9216	2.20715	83.2817	Promoter (<=1kb)	85035	85112	78	1	854628	rna-tM(CAU)Q2	-902	.	tRNA-Met	tRNA	.	tM(CAU)Q2
chrV	60919	62279	1361	1362	61147	279	25.7559	2.01622	24.3465	Promoter (<=1kb)	61890	61960	71	2	856661	rna-tG(GCC)E	0	.	tRNA-Gly	tRNA	.	tG(GCC)E
chrV	130761	131570	810	811	131152	763	297.951	5.5014	295.977	Promoter (<=1kb)	131082	131153	72	2	856703	rna-tQ(UUG)E2	0	.	tRNA-Gln	tRNA	.	tQ(UUG)E2
chrV	135018	135793	776	777	135479	1095	572.513	7.89206	570.236	Promoter (<=1kb)	135425	135497	73	2	856706	rna-tK(CUU)E1	0	.	tRNA-Lys	tRNA	.	tK(CUU)E1
chrV	138175	141531	3357	3358	138688	1217	685.228	8.77056	682.844	Promoter (<=1kb)	138666	138737	72	1	856708	rna-tR(UCU)E	0	.	tRNA-Arg	tRNA	.	tR(UCU)E
chrV	167234	167782	549	550	167564	292	29.9125	2.10983	28.4778	Promoter (<=1kb)	167427	167586	160	2	9164888	NR_132167	0	.	SNR14	snRNA	.	snR14
chrV	176451	177802	1352	1353	177110	1821	1313.17	13.1198	1310.39	Promoter (<=1kb)	177099	177170	72	1	856730	rna-tE(UUC)E1	0	.	tRNA-Glu	tRNA	.	tE(UUC)E1
chrV	206779	208050	1272	1273	207354	1393	857.064	10.0379	854.56	Promoter (<=1kb)	207357	207428	72	1	856747	rna-tH(GUG)E1	0	.	tRNA-His	tRNA	.	tH(GUG)E1
chrV	249836	250766	931	932	250312	956	451.33	6.89115	449.179	Promoter (<=1kb)	250286	250357	72	1	856773	rna-tQ(UUG)E1	0	.	tRNA-Gln	tRNA	.	tQ(UUG)E1
chrV	311555	312527	973	974	312085	966	459.769	6.96316	457.609	Promoter (<=1kb)	312023	312095	73	2	856808	rna-tA(UGC)E	0	.	tRNA-Ala	tRNA	.	tA(UGC)E
chrV	354549	355574	1026	1027	354956	1182	652.325	8.51853	649.971	Promoter (<=1kb)	354934	355005	72	1	856833	rna-tE(UUC)E2	0	.	tRNA-Glu	tRNA	.	tE(UUC)E2
chrV	430607	432211	1605	1606	431335	3222	3073.86	23.2081	3070.21	Promoter (<=1kb)	431129	431220	92	2	9164886	NR_132170	0	.	SNR52	snoRNA	.	snR52
chrV	433928	436235	2308	2309	434612	1878	1377.46	13.5303	1374.65	Promoter (<=1kb)	434541	434612	72	2	856871	rna-tH(GUG)E2	0	.	tRNA-His	tRNA	.	tH(GUG)E2
chrV	469008	469948	941	942	469467	957	452.171	6.89835	450.02	Promoter (<=1kb)	469457	469530	74	1	856894	rna-tV(AAC)E2	0	.	tRNA-Val	tRNA	.	tV(AAC)E2
chrV	486842	487912	1071	1072	487378	1785	1272.97	12.8606	1270.21	Promoter (<=1kb)	487331	487402	72	2	856902	rna-tE(UUC)E3	0	.	tRNA-Glu	tRNA	.	tE(UUC)E3
chrVI	157561	158403	843	844	157991	986	476.783	7.10718	474.605	Promoter (<=1kb)	157916	158007	92	2	850557	rna-tF(GAA)F	0	.	tRNA-Phe	tRNA	.	tF(GAA)F
chrVI	191172	192047	876	877	191589	1111	586.973	8.00727	584.68	Promoter (<=1kb)	191513	191613	101	2	850575	rna-tS(GCU)F	0	.	tRNA-Ser	tRNA	.	tS(GCU)F
chrVII	73443	74397	955	956	73904	1026	511.336	7.39521	509.12	Promoter (<=1kb)	73829	73902	74	2	852627	rna-tV(AAC)G3	0	.	tRNA-Val	tRNA	.	tV(AAC)G3
chrVII	110175	111017	843	844	110677	894	400.033	6.4447	397.94	Promoter (<=1kb)	110625	110696	72	2	852668	rna-tH(GUG)G1	0	.	tRNA-His	tRNA	.	tH(GUG)G1
chrVII	115000	116048	1049	1050	115506	888	395.166	6.4015	393.078	Promoter (<=1kb)	115488	115583	96	1	852671	rna-tK(UUU)G1	0	.	tRNA-Lys	tRNA	.	tK(UUU)G1
chrVII	121914	122742	829	830	122277	805	329.692	5.80383	327.68	Promoter (<=1kb)	122269	122341	73	1	852674	rna-tK(CUU)G1	0	.	tRNA-Lys	tRNA	.	tK(CUU)G1
chrVII	205180	205995	816	817	205550	828	347.479	5.96945	345.448	Promoter (<=1kb)	205521	205634	114	1	852718	rna-tL(CAA)G1	0	.	tRNA-Leu	tRNA	.	tL(CAA)G1
chrVII	286906	287981	1076	1077	287428	1118	593.331	8.05768	591.031	Promoter (<=1kb)	287350	287455	106	2	852759	rna-tW(CCA)G1	0	.	tRNA-Trp	tRNA	.	tW(CCA)G1
chrVII	316674	316947	274	275	316869	181	3.72355	1.31054	2.56493	Promoter (<=1kb)	316788	317055	268	1	9164893	NR_132178	0	.	SNR82	snoRNA	.	snR82
chrVII	319317	320286	970	971	319784	1097	574.316	7.90646	572.036	Promoter (<=1kb)	319781	319852	72	1	852781	rna-tH(GUG)G2	0	.	tRNA-His	tRNA	.	tH(GUG)G2
chrVII	405160	405981	822	823	405495	866	377.47	6.24308	375.402	Promoter (<=1kb)	405470	405541	72	1	852831	rna-tR(UCU)G1	0	.	tRNA-Arg	tRNA	.	tR(UCU)G1
chrVII	411865	412789	925	926	412366	1078	557.261	7.76965	555	Promoter (<=1kb)	412294	412367	74	2	852836	rna-tV(AAC)G1	0	.	tRNA-Val	tRNA	.	tV(AAC)G1
chrVII	531099	532066	968	969	531614	910	413.098	6.55992	410.99	Promoter (<=1kb)	531610	531681	72	1	852907	rna-tD(GUC)G1	0	.	tRNA-Asp	tRNA	.	tD(GUC)G1
chrVII	541489	542500	1012	1013	541861	1925	1431.04	13.8687	1428.2	Promoter (<=1kb)	541850	541921	72	1	852914	rna-tE(UUC)G3	0	.	tRNA-Glu	tRNA	.	tE(UUC)G3
chrVII	544071	545721	1651	1652	544633	1206	674.839	8.69135	672.465	Promoter (<=1kb)	544577	544648	72	2	852917	rna-tD(GUC)G2	0	.	tRNA-Asp	tRNA	.	tD(GUC)G2
chrVII	561175	562049	875	876	561729	1646	1120.73	11.8597	1118.06	Promoter (<=1kb)	561662	561743	82	2	852927	rna-tS(AGA)G	0	.	tRNA-Ser	tRNA	.	tS(AGA)G
chrVII	609120	610302	1183	1184	609431	487	117.424	3.51398	115.704	Promoter (<=1kb)	609584	609696	113	1	9164898	NR_132183	0	.	SNR48	snoRNA	.	snR48
chrVII	661242	662288	1047	1048	661754	1414	878.236	10.1891	875.72	Promoter (<=1kb)	661749	661820	72	1	852981	rna-tT(UGU)G1	0	.	tRNA-Thr	tRNA	.	tT(UGU)G1
chrVII	700158	701138	981	982	700710	1094	571.613	7.88486	569.337	Promoter (<=1kb)	700675	700756	82	1	852999	rna-tL(GAG)G	0	.	tRNA-Leu	tRNA	.	tL(GAG)G
chrVII	731106	731765	660	661	731269	473	109.815	3.41317	108.113	Promoter (<=1kb)	731137	731210	74	1	853018	rna-tN(GUU)G	0	.	tRNA-Asn	tRNA	.	tN(GUU)G
chrVII	738640	739742	1103	1104	739141	1126	600.62	8.11529	598.313	Promoter (<=1kb)	739122	739195	74	1	853024	rna-tI(AAU)G	0	.	tRNA-Ile	tRNA	.	tI(AAU)G
chrVII	773887	775004	1118	1119	774359	1302	766.93	9.38262	764.485	Promoter (<=1kb)	774349	774421	73	1	853044	rna-tA(AGC)G	0	.	tRNA-Ala	tRNA	.	tA(AGC)G
chrVII	793914	794865	952	953	794434	1313	777.682	9.46183	775.23	Promoter (<=1kb)	794417	794489	73	1	853054	rna-tA(UGC)G	0	.	tRNA-Ala	tRNA	.	tA(UGC)G
chrVII	845116	846242	1127	1128	845657	1263	729.134	9.10179	726.715	Promoter (<=1kb)	845649	845719	71	1	853084	rna-tG(GCC)G1	0	.	tRNA-Gly	tRNA	.	tG(GCC)G1
chrVII	856856	857897	1042	1043	857452	819	340.486	5.90464	338.462	Promoter (<=1kb)	857378	857491	114	2	853092	rna-tL(CAA)G3	0	.	tRNA-Leu	tRNA	.	tL(CAA)G3
chrVII	875896	877032	1137	1138	876412	1208	658.379	8.37062	656.019	Promoter (<=1kb)	876394	876466	73	1	853101	rna-tK(CUU)G3	0	.	tRNA-Lys	tRNA	.	tK(CUU)G3
chrVII	930576	931419	844	845	931021	1080	559.05	7.78405	556.787	Promoter (<=1kb)	930953	931023	71	2	853132	rna-tG(GCC)G2	0	.	tRNA-Gly	tRNA	.	tG(GCC)G2
chrVIII	133949	134779	831	832	134333	1108	584.254	7.98567	581.965	Promoter (<=1kb)	134321	134392	72	1	856407	rna-tQ(UUG)H	0	.	tRNA-Gln	tRNA	.	tQ(UUG)H
chrVIII	145897	146815	919	920	146293	1094	571.613	7.88486	569.337	Promoter (<=1kb)	146242	146314	73	2	856414	rna-tA(AGC)H	0	.	tRNA-Ala	tRNA	.	tA(AGC)H
chrVIII	237366	238346	981	982	237926	866	377.47	6.24308	375.402	Promoter (<=1kb)	237848	237939	92	2	856469	rna-tF(GAA)H1	0	.	tRNA-Phe	tRNA	.	tF(GAA)H1
chrVIII	358085	358931	847	848	358558	943	440.426	6.79754	438.287	Promoter (<=1kb)	358478	358569	92	2	856525	rna-tF(GAA)H2	0	.	tRNA-Phe	tRNA	.	tF(GAA)H2
chrVIII	410743	411630	888	889	411099	381	64.5403	2.7507	62.9611	Promoter (<=1kb)	411228	411317	90	1	9164902	NR_132189	0	.	SNR71	snoRNA	.	snR71
chrVIII	466091	467785	1695	1696	466985	3833	3933.92	27.6078	3930	Promoter (<=1kb)	466990	467061	72	1	856586	rna-tT(UGU)H	0	.	tRNA-Thr	tRNA	.	tT(UGU)H
chrX	196994	197684	691	692	197378	872	382.272	6.28629	380.199	Promoter (<=1kb)	197313	197385	73	2	853328	rna-tA(AGC)J	0	.	tRNA-Ala	tRNA	.	tA(AGC)J
chrX	204267	205209	943	944	204731	1086	564.424	7.82725	562.155	Promoter (<=1kb)	204735	204806	72	1	853331	rna-tD(GUC)J1	0	.	tRNA-Asp	tRNA	.	tD(GUC)J1
chrX	227725	228945	1221	1222	228495	798	324.334	5.75343	322.329	Promoter (<=1kb)	228094	228479	386	2	9164908	NR_132195	0	.	SNR37	snoRNA	.	snR37
chrX	233076	234763	1688	1689	233934	3427	3357.25	24.6843	3353.48	Promoter (<=1kb)	233939	234011	73	1	853343	rna-tR(ACG)J	0	.	tRNA-Arg	tRNA	.	tR(ACG)J
chrX	355244	355988	745	746	355467	1213	681.445	8.74175	679.064	Promoter (<=1kb)	355374	355445	72	1	853403	rna-tR(UCU)J1	0	.	tRNA-Arg	tRNA	.	tR(UCU)J1
chrX	374058	374999	942	943	374548	1099	576.119	7.92086	573.838	Promoter (<=1kb)	374424	374495	72	2	853411	rna-tD(GUC)J3	0	.	tRNA-Asp	tRNA	.	tD(GUC)J3
chrX	377953	378771	819	820	378368	824	344.366	5.94065	342.338	Promoter (<=1kb)	378360	378433	74	1	853415	rna-tV(AAC)J	0	.	tRNA-Val	tRNA	.	tV(AAC)J
chrX	523693	524573	881	882	524086	979	470.808	7.05677	468.636	Promoter (<=1kb)	524012	524093	82	2	853505	rna-tS(AGA)J	0	.	tRNA-Ser	tRNA	.	tS(AGA)J
chrX	541162	541979	818	819	541524	892	398.409	6.4303	396.317	Promoter (<=1kb)	541508	541579	72	1	853517	rna-tD(GUC)J4	0	.	tRNA-Asp	tRNA	.	tD(GUC)J4
chrX	607357	609113	1757	1758	608007	657	222.433	4.73812	220.549	Promoter (<=1kb)	605936	607424	1489	2	23547381	NR_132197	0	.	IRT1	ncRNA	.	IRT1
chrX	617500	618408	909	910	617932	919	420.5	6.62472	418.384	Promoter (<=1kb)	617919	618019	101	1	853564	rna-tL(UAG)J	0	.	tRNA-Leu	tRNA	.	tL(UAG)J
chrX	663900	664177	278	279	664048	220	10.3389	1.59137	9.0678	Promoter (<=1kb)	663749	663942	194	1	9164912	NR_132198	151	.	SNR3	snoRNA	.	snR3
chrXI	74189	75101	913	914	74638	879	387.898	6.33669	385.818	Promoter (<=1kb)	74624	74697	74	1	853637	rna-tN(GUU)K	0	.	tRNA-Asn	tRNA	.	tN(GUU)K
chrXI	83789	84641	853	854	84206	920	421.325	6.63192	419.208	Promoter (<=1kb)	84208	84291	84	1	853645	rna-tL(UAA)K	0	.	tRNA-Leu	tRNA	.	tL(UAA)K
chrXI	162085	162982	898	899	162530	997	486.216	7.18638	484.028	Promoter (<=1kb)	162487	162558	72	2	853703	rna-tR(UCU)K	0	.	tRNA-Arg	tRNA	.	tR(UCU)K
chrXI	202947	203514	568	569	203121	615	194.498	4.43568	192.651	Promoter (<=1kb)	202999	203071	73	1	853731	rna-tK(CUU)K	0	.	tRNA-Lys	tRNA	.	tK(CUU)K
chrXI	219420	220393	974	975	219901	973	465.704	7.01357	463.538	Promoter (<=1kb)	219895	219967	73	1	853742	rna-tA(AGC)K1	0	.	tRNA-Ala	tRNA	.	tA(AGC)K1
chrXI	302507	303395	889	890	302939	1016	502.633	7.3232	500.426	Promoter (<=1kb)	302918	303023	106	1	853791	rna-tW(CCA)K	0	.	tRNA-Trp	tRNA	.	tW(CCA)K
chrXI	307682	308835	1154	1155	308223	927	427.112	6.68233	424.988	Promoter (<=1kb)	308144	308217	74	2	853795	rna-tV(AAC)K1	0	.	tRNA-Val	tRNA	.	tV(AAC)K1
chrXI	312964	313972	1009	1010	313462	1167	638.36	8.41052	636.018	Promoter (<=1kb)	313401	313472	72	2	853797	rna-tH(GUG)K	0	.	tRNA-His	tRNA	.	tH(GUG)K
chrXI	364444	364928	485	486	364640	220	10.3389	1.59137	9.0678	Promoter (<=1kb)	364776	364876	101	1	9164914	NR_132201	0	.	SNR69	snoRNA	.	snR69
chrXI	379902	380175	274	275	380032	219	10.1309	1.58417	8.86244	Promoter (<=1kb)	379680	379753	74	1	853835	rna-tV(AAC)K2	222	.	tRNA-Val	tRNA	.	tV(AAC)K2
chrXI	458214	459007	794	795	458589	826	345.922	5.95505	343.892	Promoter (<=1kb)	458557	458670	114	1	853879	rna-tL(CAA)K	0	.	tRNA-Leu	tRNA	.	tL(CAA)K
chrXI	490652	491400	749	750	490982	803	328.158	5.78943	326.149	Promoter (<=1kb)	490968	491040	73	1	853897	rna-tR(ACG)K	0	.	tRNA-Arg	tRNA	.	tR(ACG)K
chrXI	517845	520964	3120	3121	518008	533	143.622	3.84522	141.852	Promoter (<=1kb)	517988	518060	73	1	853913	rna-tA(AGC)K2	0	.	tRNA-Ala	tRNA	.	tA(AGC)K2
chrXI	578800	579431	632	633	579022	866	377.47	6.24308	375.402	Promoter (<=1kb)	578965	579060	96	1	853948	rna-tK(UUU)K	0	.	tRNA-Lys	tRNA	.	tK(UUU)K
chrXII	92114	93049	936	937	92576	1042	525.348	7.51042	523.118	Promoter (<=1kb)	92548	92650	103	1	850634	rna-tP(UGG)L	0	.	tRNA-Pro	tRNA	.	tP(UGG)L
chrXII	365668	366971	1304	1305	366264	2042	1318.25	10.8775	1315.47	Promoter (<=1kb)	366235	366346	112	1	9164922	NR_132206	0	.	SNR6	snRNA	.	snR6
chrXII	373845	374916	1072	1073	374365	1520	869.652	8.99982	867.141	Promoter (<=1kb)	374355	374427	73	1	850804	rna-tR(ACG)L	0	.	tRNA-Arg	tRNA	.	tR(ACG)L
chrXII	425921	428040	2120	2121	427124	4477	4375.07	24.5959	4371.07	Promoter (<=1kb)	427132	427203	72	1	850834	rna-tD(GUC)L1	0	.	tRNA-Asp	tRNA	.	tD(GUC)L1
chrXII	451170	451534	365	366	451382	290	15.8904	1.67791	14.5594	Promoter (<=1kb)	451575	451785	211	2	9164936	NR_132208	251	.	external transcribed spacer	misc_RNA	.	ETS2-1
chrXII	459458	460899	1442	1443	459829	48345	10564.2	3.32852	10559.9	Promoter (<=1kb)	459676	459796	121	1	9164945	NR_132215	0	.	5S ribosomal RNA	rRNA	.	RDN5-1
chrXII	592165	593015	851	852	592598	1306	770.738	9.40964	768.291	Promoter (<=1kb)	592519	592619	101	2	850925	rna-tL(UAG)L1	0	.	tRNA-Leu	tRNA	.	tL(UAG)L1
chrXII	605132	605664	533	534	605448	713	261.475	5.14136	259.543	Promoter (<=1kb)	605300	605432	133	2	850931	rna-tI(UAU)L	0	.	tRNA-Ile	tRNA	.	tI(UAU)L
chrXII	627741	629079	1339	1340	628139	351	51.7496	2.53468	50.2141	Promoter (<=1kb)	628383	628497	115	1	850948	rna-tL(CAA)L	0	.	tRNA-Leu	tRNA	.	tL(CAA)L
chrXII	656831	657233	403	404	656965	349	50.9351	2.52028	49.4026	Promoter (<=1kb)	656934	657006	73	2	850960	rna-tA(AGC)L	0	.	tRNA-Ala	tRNA	.	tA(AGC)L
chrXII	687528	688402	875	876	687921	919	420.5	6.62472	418.384	Promoter (<=1kb)	687859	687932	74	2	850978	rna-tV(AAC)L	0	.	tRNA-Val	tRNA	.	tV(AAC)L
chrXII	731598	732995	1398	1399	732129	1322	735.632	8.63083	733.208	Promoter (<=1kb)	732090	732190	101	1	851009	rna-tL(UAG)L2	0	.	tRNA-Leu	tRNA	.	tL(UAG)L2
chrXII	734091	735306	1216	1217	734221	200	4.53842	1.34029	3.3609	Promoter (<=1kb)	734802	734875	74	1	851012	rna-tI(AAU)L1	0	.	tRNA-Ile	tRNA	.	tI(AAU)L1
chrXII	783751	784856	1106	1107	784480	666	228.572	4.80292	226.681	Promoter (<=1kb)	784354	784453	100	1	851038	rna-tX(XXX)L	0	.	tRNA-OTHER	tRNA	.	tX(XXX)L
chrXII	793357	797864	4508	4509	793911	1328	780.799	9.3587	778.345	Promoter (<=1kb)	793918	793989	72	1	851044	rna-tD(GUC)L2	0	.	tRNA-Asp	tRNA	.	tD(GUC)L2
chrXII	874861	875957	1097	1098	875382	1315	779.641	9.47623	777.188	Promoter (<=1kb)	875376	875471	96	1	851093	rna-tK(UUU)L	0	.	tRNA-Lys	tRNA	.	tK(UUU)L
chrXII	962504	963665	1162	1163	963048	1198	667.311	8.63374	664.943	Promoter (<=1kb)	962972	963055	84	2	851138	rna-tL(UAA)L	0	.	tRNA-Leu	tRNA	.	tL(UAA)L
chrXII	975653	976361	709	710	976048	802	327.392	5.78223	325.384	Promoter (<=1kb)	975983	976056	74	2	851144	rna-tN(GUU)L	0	.	tRNA-Asn	tRNA	.	tN(GUU)L
chrXII	1051664	1052697	1034	1035	1052146	1223	690.913	8.81376	688.523	Promoter (<=1kb)	1052071	1052144	74	2	851176	rna-tI(AAU)L2	0	.	tRNA-Ile	tRNA	.	tI(AAU)L2
chrXIII	67670	68113	444	445	67899	247	16.6538	1.78579	15.3153	Promoter (<=1kb)	67768	67938	171	2	9164957	NR_132234	0	.	SNR85	snoRNA	.	snR85
chrXIII	91368	92571	1204	1205	91965	1581	1051.27	11.3916	1048.65	Promoter (<=1kb)	91970	92027	58	1	23547382	NR_132235	0	.	ZOD1	ncRNA	.	ZOD1
chrXIII	183527	184319	793	794	183965	1149	621.713	8.2809	619.386	Promoter (<=1kb)	183898	183968	71	2	854961	rna-tG(GCC)M	0	.	tRNA-Gly	tRNA	.	tG(GCC)M
chrXIII	258681	259669	989	990	259218	1144	617.11	8.2449	614.788	Promoter (<=1kb)	259158	259239	82	2	855007	rna-tS(AGA)M	0	.	tRNA-Ser	tRNA	.	tS(AGA)M
chrXIII	290279	291347	1069	1070	290819	1074	553.689	7.74084	551.432	Promoter (<=1kb)	290801	290872	72	1	855024	rna-tE(UUC)M	0	.	tRNA-Glu	tRNA	.	tE(UUC)M
chrXIII	362638	363690	1053	1054	363050	1599	1070.39	11.5213	1067.76	Promoter (<=1kb)	363064	363135	72	1	855065	rna-tH(GUG)M	0	.	tRNA-His	tRNA	.	tH(GUG)M
chrXIII	372062	372840	779	780	372517	1129	603.36	8.13689	601.05	Promoter (<=1kb)	372445	372518	74	2	855069	rna-tV(AAC)M1	0	.	tRNA-Val	tRNA	.	tV(AAC)M1
chrXIII	378876	379890	1015	1016	379395	1206	674.839	8.69135	672.465	Promoter (<=1kb)	379303	379408	106	2	855072	rna-tW(CCA)M	0	.	tRNA-Trp	tRNA	.	tW(CCA)M
chrXIII	420170	421055	886	887	420628	843	359.229	6.07746	357.183	Promoter (<=1kb)	420588	420661	74	2	855100	rna-tV(AAC)M2	0	.	tRNA-Val	tRNA	.	tV(AAC)M2
chrXIII	463128	464022	895	896	463570	1155	627.248	8.32411	624.916	Promoter (<=1kb)	463554	463625	72	1	855124	rna-tD(GUC)M	0	.	tRNA-Asp	tRNA	.	tD(GUC)M
chrXIII	480294	481131	838	839	480685	931	430.429	6.71113	428.302	Promoter (<=1kb)	480621	480693	73	2	855133	rna-tK(CUU)M	0	.	tRNA-Lys	tRNA	.	tK(CUU)M
chrXIII	504505	505320	816	817	504913	1000	488.798	7.20799	486.607	Promoter (<=1kb)	504895	505008	114	1	855146	rna-tL(CAA)M	0	.	tRNA-Leu	tRNA	.	tL(CAA)M
chrXIII	747426	748186	761	762	747940	1173	643.936	8.45372	641.589	Promoter (<=1kb)	747892	747963	72	2	855279	rna-tR(UCU)M1	0	.	tRNA-Arg	tRNA	.	tR(UCU)M1
chrXIV	88391	89310	920	921	89021	822	342.812	5.92625	340.786	Promoter (<=1kb)	89210	89306	97	1	9164969	NR_132249	0	.	SNR40	snoRNA	.	snR40
chrXIV	102692	103237	546	547	102981	252	17.9651	1.8218	16.6149	Promoter (<=1kb)	102716	102789	74	1	855435	rna-tN(GUU)N1	0	.	tRNA-Asn	tRNA	.	tN(GUU)N1
chrXIV	104603	105007	405	406	104880	336	45.7625	2.42666	44.2513	Promoter (<=1kb)	104805	104877	73	1	855437	rna-tT(AGU)N1	0	.	tRNA-Thr	tRNA	.	tT(AGU)N1
chrXIV	229773	230933	1161	1162	230082	211	8.53666	1.52657	7.2893	Promoter (<=1kb)	230105	230672	568	2	9164965	NR_132250	0	.	SNR19	snRNA	.	snR19
chrXIV	442735	445115	2381	2382	442990	490	119.077	3.53559	117.354	Promoter (<=1kb)	443006	443119	114	1	855627	rna-tL(CAA)N	0	.	tRNA-Leu	tRNA	.	tL(CAA)N
chrXIV	567636	568605	970	971	568128	1132	606.103	8.15849	603.791	Promoter (<=1kb)	568115	568217	103	1	855694	rna-tP(UGG)N2	0	.	tRNA-Pro	tRNA	.	tP(UGG)N2
chrXIV	585315	586403	1089	1090	585563	342	48.1235	2.46987	46.6024	Promoter (<=1kb)	585587	585926	340	1	9164967	NR_132251	0	.	NME1	RNase_MRP_RNA	.	NME1
chrXIV	602011	602753	743	744	602333	739	280.26	5.32858	278.306	Promoter (<=1kb)	602312	602385	74	1	855714	rna-tI(AAU)N2	0	.	tRNA-Ile	tRNA	.	tI(AAU)N2
chrXIV	721301	721746	446	447	721445	184	4.11821	1.33215	2.95001	Promoter (<=1kb)	721938	722211	274	2	9164970	NR_132254	465	.	SNR191	snoRNA	.	snR191
chrXIV	725828	726661	834	835	726207	904	408.184	6.51671	406.082	Promoter (<=1kb)	726134	726217	84	2	855791	rna-tL(UAA)N	0	.	tRNA-Leu	tRNA	.	tL(UAA)N
chrXV	113362	114255	894	895	113803	1038	520.507	7.45643	518.281	Promoter (<=1kb)	113802	113874	73	1	854045	rna-tT(AGU)O1	0	.	tRNA-Thr	tRNA	.	tT(AGU)O1
chrXV	226244	227093	850	851	226667	874	383.877	6.30069	381.802	Promoter (<=1kb)	226611	226681	71	2	854100	rna-tG(GCC)O1	0	.	tRNA-Gly	tRNA	.	tG(GCC)O1
chrXV	227966	228756	791	792	228344	918	419.676	6.61752	417.56	Promoter (<=1kb)	228331	228404	74	1	854101	rna-tN(GUU)O1	0	.	tRNA-Asn	tRNA	.	tN(GUU)O1
chrXV	233733	234634	902	903	233835	183	3.98443	1.32494	2.81943	Promoter (<=1kb)	234346	234546	201	1	9164973	NR_132256	0	.	SNR81	snoRNA	.	snR81
chrXV	353655	354610	956	957	354095	963	457.233	6.94156	455.075	Promoter (<=1kb)	354041	354113	73	2	854176	rna-tT(AGU)O2	0	.	tRNA-Thr	tRNA	.	tT(AGU)O2
chrXV	407768	408383	616	617	408107	317	38.5943	2.28985	37.1158	Promoter (<=1kb)	407948	408134	187	2	9164974	NR_132258	0	.	SNR9	snoRNA	.	snR9
chrXV	409739	410138	400	401	409969	184	4.11821	1.33215	2.95001	Promoter (<=1kb)	409765	409864	100	2	9164978	NR_132259	0	.	SNR62	snoRNA	.	snR62
chrXV	438267	439115	849	850	438654	1005	493.11	7.24399	490.913	Promoter (<=1kb)	438643	438738	96	1	854224	rna-tK(UUU)O	0	.	tRNA-Lys	tRNA	.	tK(UUU)O
chrXV	486929	487901	973	974	487460	1084	562.631	7.81285	560.364	Promoter (<=1kb)	487439	487512	74	1	854254	rna-tN(GUU)O2	0	.	tRNA-Asn	tRNA	.	tN(GUU)O2
chrXV	571513	572422	910	911	571979	1159	630.946	8.35291	628.61	Promoter (<=1kb)	571958	572029	72	1	854298	rna-tD(GUC)O	0	.	tRNA-Asp	tRNA	.	tD(GUC)O
chrXV	663414	664288	875	876	663860	964	458.078	6.94876	455.92	Promoter (<=1kb)	663812	663885	74	2	854348	rna-tV(AAC)O	0	.	tRNA-Val	tRNA	.	tV(AAC)O
chrXV	841719	842800	1082	1083	842381	369	59.2971	2.66429	57.7357	Promoter (<=1kb)	841958	842182	225	2	9164979	NR_132264	0	.	SNR31	snoRNA	.	snR31
chrXV	853641	854838	1198	1199	854241	1155	627.248	8.32411	624.916	Promoter (<=1kb)	854187	854259	73	2	854464	rna-tA(UGC)O	0	.	tRNA-Ala	tRNA	.	tA(UGC)O
chrXV	979387	979850	464	465	979576	221	10.5488	1.59857	9.27505	Promoter (<=1kb)	980683	980787	105	1	854526	rna-tP(UGG)O3	-833	.	tRNA-Pro	tRNA	.	tP(UGG)O3
chrXV	980139	981193	1055	1056	980709	1176	646.729	8.47532	644.379	Promoter (<=1kb)	980683	980787	105	1	854526	rna-tP(UGG)O3	0	.	tRNA-Pro	tRNA	.	tP(UGG)O3
chrXVI	55747	56618	872	873	56263	1019	505.24	7.3448	503.03	Promoter (<=1kb)	56169	56274	106	2	855815	rna-tW(CCA)P	0	.	tRNA-Trp	tRNA	.	tW(CCA)P
chrXVI	209700	210792	1093	1094	210252	1205	673.897	8.68415	671.523	Promoter (<=1kb)	210192	210263	72	2	855924	rna-tE(UUC)P	0	.	tRNA-Glu	tRNA	.	tE(UUC)P
chrXVI	435420	436343	924	925	435953	1126	600.62	8.11529	598.313	Promoter (<=1kb)	435893	435964	72	2	856046	rna-tC(GCA)P1	0	.	tRNA-Cys	tRNA	.	tC(GCA)P1
chrXVI	559647	560837	1191	1192	560272	1255	721.445	9.04419	719.032	Promoter (<=1kb)	560198	560289	92	2	856109	rna-tF(GAA)P1	0	.	tRNA-Phe	tRNA	.	tF(GAA)P1
chrXVI	571770	572904	1135	1136	572318	1474	939.469	10.6212	936.913	Promoter (<=1kb)	572269	572339	71	1	856116	rna-tG(GCC)P1	0	.	tRNA-Gly	tRNA	.	tG(GCC)P1
chrXVI	581678	582517	840	841	582082	920	421.325	6.63192	419.208	Promoter (<=1kb)	582062	582134	73	1	856120	rna-tK(CUU)P	0	.	tRNA-Lys	tRNA	.	tK(CUU)P
chrXVI	622118	623143	1026	1027	622637	1202	671.072	8.66255	668.701	Promoter (<=1kb)	622540	622631	92	2	856139	rna-tF(GAA)P2	0	.	tRNA-Phe	tRNA	.	tF(GAA)P2
chrXVI	718526	719543	1018	1019	719318	293	30.2426	2.11703	28.806	Promoter (<=1kb)	718700	718806	107	2	9164983	NR_132268	0	.	SNR51	snoRNA	.	snR51
chrXVI	768791	769865	1075	1076	769279	1242	708.998	8.95058	706.594	Promoter (<=1kb)	769207	769302	96	2	856235	rna-tK(UUU)P	0	.	tRNA-Lys	tRNA	.	tK(UUU)P
chrXVI	775369	776261	893	894	775827	873	383.075	6.29349	381	Promoter (<=1kb)	775765	775836	72	2	856238	rna-tC(GCA)P2	0	.	tRNA-Cys	tRNA	.	tC(GCA)P2
chrXVI	810364	811140	777	778	810661	1330	794.378	9.58425	791.914	Promoter (<=1kb)	810676	810749	74	1	856259	rna-tN(GUU)P	0	.	tRNA-Asn	tRNA	.	tN(GUU)P
chrXVI	819022	820213	1192	1193	819532	983	474.22	7.08557	472.044	Promoter (<=1kb)	819529	819602	74	1	856266	rna-tI(AAU)P1	0	.	tRNA-Ile	tRNA	.	tI(AAU)P1
chrXVI	856647	857475	829	830	856920	1337	801.28	9.63465	798.811	Promoter (<=1kb)	856902	856974	73	1	856286	rna-tA(AGC)P	0	.	tRNA-Ala	tRNA	.	tA(AGC)P
chrXVI	879916	880939	1024	1025	880345	917	418.852	6.61032	416.737	Promoter (<=1kb)	880296	880369	74	2	856299	rna-tI(AAU)P2	0	.	tRNA-Ile	tRNA	.	tI(AAU)P2

## Sheet: SMT3 peaks in ubc9-2KR
chr	start	end	width	length	abs_summit	pileup	(-)log10(pvalue)	fold_enrichment	(-)log10(qvalue)	MACS_peakID	annotation	geneChr	geneStart	geneEnd	geneLength	geneStrand	geneId	transcriptId	distanceToTSS	Gene_Symbol	Description	gene_biotype	Protein_ID	locus_tag
chrXVI	859777	860932	1156	1157	860385	1157	488.398	6.03366	486.278	ubc92KR_IP_1_peak_671	Promoter (<=1kb)	16	860314	860415	102	2	1466523	NM_001184628	0	.	uncharacterized protein	protein_coding	NP_878184.1	YPR159C-A
chrXVI	743658	744845	1188	1189	744284	1623	889.451	8.46172	887.044	ubc92KR_IP_1_peak_663	Promoter (<=1kb)	16	744175	744387	213	1	1466522	NM_001184581	0	.	uncharacterized protein	protein_coding	NP_878183.1	YPR108W-A
chrXVI	188578	188998	421	422	188794	377	32.2656	1.96954	30.8372	ubc92KR_IP_1_peak_636	Promoter (<=1kb)	16	188307	188513	207	2	1466518	NM_001184537	-65	COA2	Coa2p	protein_coding	NP_878179.1	YPL189C-A
chrXV	639020	639441	422	423	639268	324	18.1292	1.69339	16.79	ubc92KR_IP_1_peak_610	Promoter (<=1kb)	15	639121	639267	147	2	1466484	NM_001184625	0	.	uncharacterized protein	protein_coding	NP_878172.1	YOR161C-C
chrXV	463782	465014	1233	1234	464447	1867	1123.93	9.73306	1121.4	ubc92KR_IP_1_peak_605	Promoter (<=1kb)	15	464469	464630	162	1	1466483	NM_001184526	0	.	uncharacterized protein	protein_coding	NP_878171.1	YOR072W-B
chrXV	300571	301644	1074	1075	301098	1228	544.924	6.4036	542.759	ubc92KR_IP_1_peak_596	Promoter (<=1kb)	15	301047	301238	192	1	854147	NM_001184640	0	.	uncharacterized protein	protein_coding	NP_878166.1	YOL013W-A
chrXV	287243	288798	1556	1557	288197	1480	759.293	7.71663	756.964	ubc92KR_IP_1_peak_595	Promoter (<=1kb)	15	288420	288572	153	1	1466477	NM_001184622	0	.	uncharacterized protein	protein_coding	NP_878165.1	YOL019W-A
chrXV	252804	255046	2243	2244	253943	1970	1227.18	10.2697	1224.59	ubc92KR_IP_1_peak_592	Promoter (<=1kb)	15	254926	255021	96	2	1466476	NM_001184641	0	.	uncharacterized protein	protein_coding	NP_878164.1	YOL038C-A
chrXV	28675	29169	495	496	28923	422	20.694	1.63811	19.338	ubc92KR_IP_1_peak_580	Promoter (1-2kb)	15	27084	27218	135	1	1466474	NM_001184666	1591	.	uncharacterized protein	protein_coding	NP_878162.1	YOL155W-A
chrXV	240	989	750	751	560	328	19.0738	1.71423	17.7276	ubc92KR_IP_1_peak_579	Promoter (<=1kb)	15	585	740	156	1	1466472	NM_001184623	0	.	uncharacterized protein	protein_coding	NP_878160.1	YOL166W-A
chrXIV	546350	547661	1312	1313	547093	1917	1173.75	9.99358	1171.19	ubc92KR_IP_1_peak_564	Promoter (<=1kb)	14	547113	547370	258	1	1466515	NM_001184662	0	.	uncharacterized protein	protein_coding	NP_878157.3	YNL042W-B
chrXIV	498957	502040	3084	3085	499782	520	85.3549	2.71463	83.7337	ubc92KR_IP_1_peak_562a	Promoter (<=1kb)	14	499417	499557	141	1	1466514	NM_001184639	0	.	uncharacterized protein	protein_coding	NP_878156.3	YNL067W-B
chrXIII	753012	755836	2825	2826	753301	287	10.4226	1.5006	9.15438	ubc92KR_IP_1_peak_534a	Promoter (<=1kb)	13	754297	754386	90	1	1466505	NM_001184616	0	.	uncharacterized protein	protein_coding	NP_878147.1	YMR242W-A
chrXIII	731669	733334	1666	1667	732224	1201	523.213	6.26292	521.065	ubc92KR_IP_1_peak_532a	Promoter (<=1kb)	13	733268	733456	189	1	1466504	NM_001184573	0	.	uncharacterized protein	protein_coding	NP_878146.1	YMR230W-A
chrXIII	650091	653137	3047	3048	650995	1988	1241.73	10.3143	1239.14	ubc92KR_IP_1_peak_528a	Promoter (<=1kb)	13	652594	652887	294	2	1466503	NM_001184524	0	CMC4	Cmc4p	protein_coding	NP_878145.1	YMR194C-B
chrXII	930679	933076	2398	2399	931042	300	12.9124	1.56834	11.6182	ubc92KR_IP_1_peak_486a	Promoter (<=1kb)	12	932206	932355	150	2	1466423	NM_001184610	0	.	uncharacterized protein	protein_coding	NP_878135.1	YLR406C-A
chrXII	812547	815992	3446	3447	812837	236	2.48081	1.19509	1.34796	ubc92KR_IP_1_peak_480a	Promoter (<=1kb)	12	815810	815983	174	1	1466421	NM_001184569	0	.	uncharacterized protein	protein_coding	NP_878133.1	YLR342W-A
chrXII	673597	673982	386	387	673742	293	11.5415	1.53186	10.2613	ubc92KR_IP_1_peak_468	Promoter (<=1kb)	12	673828	673944	117	2	1466417	NM_001184638	0	.	uncharacterized protein	protein_coding	NP_878129.1	YLR264C-A
chrXII	490450	490813	364	365	490601	161	10.7109	1.75064	9.3489	ubc92KR_IP_2_peak_452	Promoter (<=1kb)	12	490406	490594	189	1	1466416	NM_001184566	44	RRT15	Rrt15p	protein_coding	NP_878128.1	YLR162W-A
chrXII	468684	469046	363	364	468868	696	173.871	3.63166	172.083	ubc92KR_IP_1_peak_456	Promoter (<=1kb)	12	468827	468958	132	2	1466410	NM_001184564	0	.	uncharacterized protein	protein_coding	NP_878126.1	YLR154C-H
chrXII	5612	5937	326	327	5767	441	53.5734	2.303	52.0525	ubc92KR_IP_1_peak_428	Promoter (<=1kb)	12	5605	5775	171	1	1466404	NM_001184605	7	.	uncharacterized protein	protein_coding	NP_878115.1	YLL066W-B
chrXI	307543	309773	2231	2232	308262	1682	944.775	8.76913	942.338	ubc92KR_IP_1_peak_407a	Promoter (<=1kb)	11	309206	309442	237	1	1500487	NM_001184534	0	.	uncharacterized protein	protein_coding	NP_878111.1	YKL068W-A
chrXI	259084	259879	796	797	259538	388	35.6157	2.02685	34.1689	ubc92KR_IP_1_peak_404	Promoter (<=1kb)	11	259073	259222	150	2	1500486	NM_001184604	0	.	uncharacterized protein	protein_coding	NP_878110.1	YKL096C-B
chrX	348904	349536	633	634	349214	321	17.4346	1.67775	16.1007	ubc92KR_IP_1_peak_360	Promoter (<=1kb)	10	349044	349178	135	2	1466468	NM_001184635	0	.	uncharacterized protein	protein_coding	NP_878105.1	YJL047C-A
chrX	159493	160226	734	735	159703	153	8.77538	1.66419	7.44305	ubc92KR_IP_2_peak_346	Promoter (<=1kb)	10	159623	159847	225	2	1466465	NM_001184636	0	DPI8	Dpi8p	protein_coding	NP_878102.1	YJL133C-A
chrIX	96641	97222	582	583	96882	308	14.5638	1.61002	13.2547	ubc92KR_IP_1_peak_146	Promoter (<=1kb)	9	96522	96725	204	2	1466491	NM_001184555	0	.	uncharacterized protein	protein_coding	NP_878096.1	YIL134C-A
chrVII	479057	483625	4569	4570	479583	500	76.7856	2.61042	75.1888	ubc92KR_IP_1_peak_273a	Promoter (<=1kb)	7	482941	483027	87	2	1466455	NM_001184592	0	.	uncharacterized protein	protein_coding	NP_878075.3	YGL007C-A
chrVII	147982	150232	2251	2252	149302	3922	3531.31	20.4405	3527.93	ubc92KR_IP_1_peak_251	Promoter (<=1kb)	7	148824	148964	141	2	1466453	NM_001184593	0	.	uncharacterized protein	protein_coding	NP_878073.3	YGL188C-A
chrVI	220166	225527	5362	5363	220351	294	11.733	1.53707	10.4508	ubc92KR_IP_1_peak_242a	Promoter (<=1kb)	6	223710	223973	264	2	1466402	NM_001184591	0	MIN10	Min10p	protein_coding	NP_878072.1	YFR032C-B
chrV	569571	569929	359	360	569664	238	3.3542	1.24529	2.19549	ubc92KR_IP_1_peak_228a	Promoter (<=1kb)	5	569608	569907	300	2	1466538	NM_001184633	0	.	uncharacterized protein	protein_coding	NP_878070.1	YER188C-A
chrIV	1489024	1490302	1279	1280	1489622	647	147.052	3.37635	145.302	ubc92KR_IP_1_peak_141	Promoter (<=1kb)	4	1489403	1489492	90	1	1466437	NM_001184632	0	.	uncharacterized protein	protein_coding	NP_878066.3	YDR524W-C
chrII	612036	614683	2648	2649	612638	334	20.5296	1.74549	19.1737	ubc92KR_IP_1_peak_41a	Promoter (<=1kb)	2	614024	614173	150	2	1466447	NM_001184541	0	.	uncharacterized protein	protein_coding	NP_878051.3	YBR196C-A
chrII	88896	90603	1708	1709	89743	1634	899.696	8.51903	897.283	ubc92KR_IP_1_peak_17	Promoter (<=1kb)	2	89458	89556	99	2	1466440	NM_001184584	0	.	uncharacterized protein	protein_coding	NP_878044.1	YBL071C-B
chrI	71063	73770	2708	2709	71934	596	120.848	3.11062	119.143	ubc92KR_IP_1_peak_2a	Promoter (<=1kb)	1	73426	73518	93	2	1466428	NM_001184629	0	.	uncharacterized protein	protein_coding	NP_878040.1	YAL037C-A
chrV	550875	551706	832	833	551356	1001	371.011	5.22084	369.003	ubc92KR_IP_1_peak_227	Promoter (<=1kb)	5	550865	551122	258	2	856928	NM_001184517	0	SLO1	Slo1p	protein_coding	NP_796378.3	YER180C-A
chrXVI	644957	645315	359	360	645160	255	5.37303	1.33387	4.17251	ubc92KR_IP_1_peak_653	Promoter (<=1kb)	16	645950	646153	204	1	856149	NM_001184516	-635	SPO24	Spo24p	protein_coding	NP_690847.1	YPR036W-A
chrXVI	645836	646214	379	380	646036	322	17.6648	1.68296	16.3292	ubc92KR_IP_1_peak_654	Promoter (<=1kb)	16	645950	646153	204	1	856149	NM_001184516	0	SPO24	Spo24p	protein_coding	NP_690847.1	YPR036W-A
chrIV	1237589	1238130	542	543	1237857	142	6.40126	1.54532	5.11264	ubc92KR_IP_2_peak_120	Promoter (<=1kb)	4	1238312	1238850	539	2	851989	NM_001184511	720	COI1	Coi1p	protein_coding	NP_219495.2	YDR381C-A
chrVI	226257	227103	847	848	226751	821	248.828	4.28296	246.95	ubc92KR_IP_1_peak_243	Promoter (<=1kb)	6	226121	226465	345	2	850595	NM_001180000	0	.	uncharacterized protein	protein_coding	NP_116693.3	YFR035C
chrVI	215501	216038	538	539	215582	229	2.48173	1.1984	1.34796	ubc92KR_IP_1_peak_241a	Promoter (2-3kb)	6	213312	216419	3108	1	850588	NM_001179995	2189	MET10	sulfite reductase subunit alpha	protein_coding	NP_116686.3	YFR030W
chrVI	204555	205438	884	885	205012	920	314.125	4.79879	312.175	ubc92KR_IP_1_peak_239	Promoter (<=1kb)	6	203743	204750	1008	2	850581	NM_001179990	0	HIS2	histidinol-phosphatase	protein_coding	NP_116681.1	YFR025C
chrVI	180295	181841	1547	1548	181031	2534	1831.16	13.2084	1828.32	ubc92KR_IP_1_peak_237	Promoter (<=1kb)	6	177042	180743	3702	2	850570	NM_001179981	0	AIP5	Aip5p	protein_coding	NP_116671.1	YFR016C
chrVI	166918	167867	950	951	167468	1095	440.578	5.71062	438.502	ubc92KR_IP_1_peak_236	Promoter (<=1kb)	6	166746	167258	513	2	850563	NM_001179976	0	MIC19	Mic19p	protein_coding	NP_116666.1	YFR011C
chrVI	148324	148721	398	399	148536	264	6.63243	1.38076	5.41152	ubc92KR_IP_1_peak_233	Promoter (<=1kb)	6	149110	149724	615	1	850551	NM_001179966	-389	LOC1	Loc1p	protein_coding	NP_116656.1	YFR001W
chrVI	137110	137991	882	883	137574	1091	437.544	5.68977	435.471	ubc92KR_IP_1_peak_232	Promoter (<=1kb)	6	134521	137157	2637	2	850545	NM_001179963	0	MSH4	MutS family protein MSH4	protein_coding	NP_116652.1	YFL003C
chrVI	96189	96930	742	743	96308	126	3.58276	1.37242	2.36859	ubc92KR_IP_2_peak_227	Promoter (<=1kb)	6	95966	97498	1533	1	850523	NM_001179945	223	GAT1	Gat1p	protein_coding	NP_116632.1	YFL021W
chrVI	63904	66454	2551	2552	65164	5631	5917.17	29.3451	5913.15	ubc92KR_IP_1_peak_230	Promoter (<=1kb)	6	63016	63993	978	2	850508	NM_001179931	0	MOB2	Mob2p	protein_coding	NP_116618.1	YFL034C-B
chrVI	4591	5439	849	850	4780	425	47.8472	2.21964	46.3473	ubc92KR_IP_1_peak_229a	Promoter (<=1kb)	6	3322	3846	525	2	850480	NM_001179903	-745	.	uncharacterized protein	protein_coding	NP_116591.1	YFL064C
chrXV	159133	161414	2282	2283	159703	572	109.16	2.98557	107.479	ubc92KR_IP_1_peak_586a	Promoter (<=1kb)	15	159173	159445	273	1	854067	NM_001184492	0	MHF1	Mhf1p	protein_coding	NP_076910.1	YOL086W-A
chrXIV	330208	332437	2230	2231	331006	1880	1136.83	9.80079	1134.29	ubc92KR_IP_1_peak_555	Promoter (<=1kb)	14	330329	330547	219	1	855559	NM_001184490	0	.	uncharacterized protein	protein_coding	NP_076906.1	YNL162W-A
chrIII	114232	114656	425	426	114447	383	22.1382	1.7169	20.7724	ubc92KR_IP_1_peak_56	Promoter (<=1kb)	3	113770	114024	255	1	850356	NM_001184462	462	.	uncharacterized protein	protein_coding	NP_076878.1	YCL001W-B
chrII	6168	6816	649	650	6552	310	14.9905	1.62044	13.6776	ubc92KR_IP_1_peak_10	Promoter (<=1kb)	2	7605	7733	129	2	852163	NM_001184458	917	PAU9	seripauperin PAU9	protein_coding	NP_076873.1	YBL108C-A
chrXIII	511496	511818	323	324	511661	136	5.25329	1.48048	3.99111	ubc92KR_IP_2_peak_513	Promoter (<=1kb)	13	511315	511569	255	1	855152	NM_001184445	181	NCW1	Ncw1p	protein_coding	NP_061493.1	YMR122W-A
chrXV	709727	710902	1176	1177	710168	2368	1647.12	12.3435	1644.35	ubc92KR_IP_1_peak_613	Promoter (<=1kb)	15	704419	709732	5314	2	854365	NM_001184388	0	.	gag-pol fusion protein	protein_coding	NP_058185.3	YOR192C-B
chrXVI	925391	927081	1691	1692	925471	120	2.73207	1.30758	1.54867	ubc92KR_IP_2_peak_665a	Promoter (<=1kb)	16	924304	926937	2634	2	856324	NM_001184291	0	OPT2	Opt2p	protein_coding	NP_015520.1	YPR194C
chrXVI	876685	877878	1194	1195	877264	178	15.3696	1.93435	13.9491	ubc92KR_IP_2_peak_663	Promoter (<=1kb)	16	876847	877632	786	2	856296	NM_001184264	0	MET16	phosphoadenylyl-sulfate reductase (thioredoxin)	protein_coding	NP_015493.1	YPR167C
chrXVI	821317	824564	3248	3249	821770	989	362.398	5.15831	360.399	ubc92KR_IP_1_peak_669a	Promoter (<=1kb)	16	819765	821423	1659	2	856267	NM_001184241	0	NOC4	ribosome biosynthesis protein NOC4	protein_coding	NP_015470.1	YPR144C
chrXVI	793764	796114	2351	2352	794708	1813	1070.78	9.4517	1068.27	ubc92KR_IP_1_peak_666	Promoter (<=1kb)	16	793911	794498	588	2	856249	NM_001184228	0	NAT3	peptide alpha-N-acetyltransferase complex B subunit NAT3	protein_coding	NP_015456.2	YPR131C
chrXVI	731017	732876	1860	1861	731212	308	14.5638	1.61002	13.2547	ubc92KR_IP_1_peak_662a	Promoter (<=1kb)	16	731224	731748	525	2	856217	NM_001184199	0	RPL11A	ribosomal 60S subunit protein L11A	protein_coding	NP_015427.1	YPR102C
chrXVI	699877	700746	870	871	700239	635	140.725	3.31382	138.985	ubc92KR_IP_1_peak_659	Promoter (<=1kb)	16	700594	701970	1377	1	856195	NM_001184177	0	TEF1	translation elongation factor EF-1 alpha	protein_coding	NP_015405.1	YPR080W
chrXVI	701860	702290	431	432	702029	378	32.5645	1.97475	31.1344	ubc92KR_IP_1_peak_660	Promoter (1-2kb)	16	700594	701970	1377	1	856195	NM_001184177	1266	TEF1	translation elongation factor EF-1 alpha	protein_coding	NP_015405.1	YPR080W
chrXVI	693688	695570	1883	1884	693952	236	3.1484	1.23487	1.99503	ubc92KR_IP_1_peak_658a	Promoter (<=1kb)	16	692796	694838	2043	2	856188	NM_001184171	0	TKL1	transketolase TKL1	protein_coding	NP_015399.1	YPR074C
chrXVI	692789	693286	498	499	692905	234	2.94939	1.22445	1.80154	ubc92KR_IP_1_peak_657	Promoter (<=1kb)	16	691933	692418	486	2	856187	NM_001184170	-371	LTP1	tyrosine protein phosphatase LTP1	protein_coding	NP_015398.1	YPR073C
chrXVI	653143	655019	1877	1878	653967	2204	1470.25	11.489	1467.56	ubc92KR_IP_1_peak_655	Promoter (<=1kb)	16	650435	653662	3228	2	856155	NM_001184139	0	PUF2	Puf2p	protein_coding	NP_015367.1	YPR042C
chrXVI	641440	643622	2183	2184	641613	280	9.18427	1.46413	7.93039	ubc92KR_IP_1_peak_652a	Promoter (<=1kb)	16	642208	643320	1113	1	856147	NM_001184132	0	GLN1	glutamate--ammonia ligase	protein_coding	NP_015360.2	YPR035W
chrXVI	555749	556348	600	601	556063	494	66.6399	2.43248	65.0739	ubc92KR_IP_1_peak_647	Promoter (<=1kb)	16	556377	557837	1461	1	856107	NM_001184098	-29	CIT3	citrate (Si)-synthase CIT3	protein_coding	NP_015325.1	YPR001W
chrXVI	481483	482220	738	739	481681	265	6.78034	1.38597	5.55726	ubc92KR_IP_1_peak_646a	Promoter (<=1kb)	16	481428	481901	474	2	856070	NM_001183851	0	EGD1	Egd1p	protein_coding	NP_015288.1	YPL037C
chrXVI	404304	407737	3434	3435	405224	525	87.5496	2.74068	85.9226	ubc92KR_IP_1_peak_644a	Promoter (<=1kb)	16	404950	406044	1095	1	856024	NM_001183895	0	RPS9A	ribosomal 40S subunit protein S9A	protein_coding	NP_015244.1	YPL081W
chrXVI	377120	377399	280	281	377286	319	16.9781	1.66733	15.648	ubc92KR_IP_1_peak_642	Promoter (<=1kb)	16	377291	378395	1105	2	856015	NM_001183904	996	RPS6A	ribosomal 40S subunit protein S6A	protein_coding	NP_015235.1	YPL090C
chrXVI	377885	379749	1865	1866	378813	2060	1319.32	10.7387	1316.69	ubc92KR_IP_1_peak_643	Promoter (<=1kb)	16	377291	378395	1105	2	856015	NM_001183904	0	RPS6A	ribosomal 40S subunit protein S6A	protein_coding	NP_015235.1	YPL090C
chrXVI	338372	339450	1079	1080	338927	1513	788.817	7.88857	786.47	ubc92KR_IP_1_peak_641	Promoter (<=1kb)	16	337436	338620	1185	2	855991	NM_001183926	0	PEX25	Pex25p	protein_coding	NP_015213.1	YPL112C
chrXVI	308323	308638	316	317	308460	137	5.4372	1.49129	4.17058	ubc92KR_IP_2_peak_633	Promoter (<=1kb)	16	306533	308221	1689	2	855975	NM_001183942	-102	TBF1	Tbf1p	protein_coding	NP_015197.1	YPL128C
chrXVI	302419	304242	1824	1825	302828	678	163.84	3.53787	162.066	ubc92KR_IP_1_peak_640a	Promoter (<=1kb)	16	303121	304014	894	1	855972	NM_001183945	0	RPL5	ribosomal 60S subunit protein L5	protein_coding	NP_015194.1	YPL131W
chrXVI	280667	283273	2607	2608	280830	271	7.7004	1.41723	6.46458	ubc92KR_IP_1_peak_639a	Promoter (<=1kb)	16	282122	282970	849	1	855960	NM_001183957	0	RPL33A	ribosomal 60S subunit protein L33A	protein_coding	NP_015182.1	YPL143W
chrXVI	193070	194594	1525	1526	193642	570	108.205	2.97515	106.526	ubc92KR_IP_1_peak_637a	Promoter (<=1kb)	16	193648	194145	498	1	855914	NM_001184001	0	MF(ALPHA)1	Mf(Alpha)1p	protein_coding	NP_015137.1	YPL187W
chrXVI	172648	173859	1212	1213	172988	552	99.7516	2.88136	98.0929	ubc92KR_IP_1_peak_635	Promoter (<=1kb)	16	172033	172755	723	2	855902	NM_001184013	0	.	uncharacterized protein	protein_coding	NP_015125.1	YPL199C
chrXVI	108409	114572	6164	6165	108728	384	34.3818	2.00601	32.9415	ubc92KR_IP_1_peak_634a	Promoter (<=1kb)	16	108652	114315	5664	1	855845	NM_001184045	0	FAS2	trifunctional fatty acid synthase subunit FAS2	protein_coding	NP_015093.1	YPL231W
chrXVI	74201	77273	3073	3074	74547	327	18.8357	1.70902	17.4911	ubc92KR_IP_1_peak_633a	Promoter (<=1kb)	16	74309	74719	411	2	855825	NM_001184064	0	ATG41	Atg41p	protein_coding	NP_015073.1	YPL250C
chrXVI	73664	77248	3585	3586	74617	328	81.1796	3.55532	79.4062	ubc92KR_IP_2_peak_625a	Promoter (<=1kb)	16	73363	73881	519	2	855824	NM_001184066	0	YAH1	adrenodoxin	protein_coding	NP_015071.1	YPL252C
chrXVI	23099	24909	1811	1812	23471	261	6.1983	1.36513	4.98402	ubc92KR_IP_1_peak_631a	Promoter (<=1kb)	16	22938	24701	1764	1	855854	NM_001184088	161	SAM3	bifunctional polyamine/amino acid permease SAM3	protein_coding	NP_015049.1	YPL274W
chrXV	1041635	1043089	1455	1456	1042074	298	12.5136	1.55791	11.2233	ubc92KR_IP_1_peak_630a	Promoter (<=1kb)	15	1041678	1043042	1365	2	854557	NM_001183795	0	GDH1	glutamate dehydrogenase (NADP(+)) GDH1	protein_coding	NP_015020.3	YOR375C
chrXV	1027838	1029847	2010	2011	1028885	2719	2041.81	14.1723	2038.88	ubc92KR_IP_1_peak_629	Promoter (<=1kb)	15	1028194	1028625	432	2	854551	NM_001183789	0	RPS12	ribosomal 40S subunit protein S12	protein_coding	NP_015014.3	YOR369C
chrXV	1003903	1004804	902	903	1004214	346	23.5787	1.80801	22.2029	ubc92KR_IP_1_peak_628	Promoter (<=1kb)	15	1005137	1006705	1569	1	854537	NM_001183775	-333	GDS1	Gds1p	protein_coding	NP_015000.3	YOR355W
chrXV	988998	989407	410	411	989181	294	11.733	1.53707	10.4508	ubc92KR_IP_1_peak_627	Promoter (<=1kb)	15	986899	988782	1884	2	854530	NM_001183768	-216	PUT4	proline permease PUT4	protein_coding	NP_014993.1	YOR348C
chrXV	925220	925541	322	323	925355	295	11.926	1.54228	10.6418	ubc92KR_IP_1_peak_624	Promoter (<=1kb)	15	923232	925040	1809	2	854503	NM_001183744	-180	FRT1	Frt1p	protein_coding	NP_014969.3	YOR324C
chrXV	900012	902550	2539	2540	900291	348	24.1044	1.81844	22.7251	ubc92KR_IP_1_peak_623a	Promoter (<=1kb)	15	900250	901194	945	2	854489	NM_001183732	0	RPL20B	ribosomal 60S subunit protein L20B	protein_coding	NP_014957.2	YOR312C
chrXV	883640	883943	304	305	883748	229	2.48173	1.1984	1.34796	ubc92KR_IP_1_peak_622	Promoter (<=1kb)	15	884514	887876	3363	1	854480	NM_001183724	-571	ISW2	DNA translocase	protein_coding	NP_014948.1	YOR304W
chrXV	882898	883267	370	371	883101	261	6.1983	1.36513	4.98402	ubc92KR_IP_1_peak_621	Promoter (<=1kb)	15	882899	884134	1236	1	854479	NM_001183722	0	CPA1	carbamoyl-phosphate synthase (glutamine-hydrolyzing) CPA1	protein_coding	NP_014947.3	YOR303W
chrXV	865969	867998	2030	2031	866771	2589	1893.19	13.495	1890.32	ubc92KR_IP_1_peak_620	Promoter (<=1kb)	15	865653	866582	930	2	854467	NM_001183711	0	.	uncharacterized protein	protein_coding	NP_014935.3	YOR292C
chrXV	853190	854800	1611	1612	853340	282	9.53071	1.47455	8.27276	ubc92KR_IP_1_peak_619a	Promoter (<=1kb)	15	853357	854112	756	1	854463	NM_001183708	0	.	uncharacterized protein	protein_coding	NP_014932.1	YOR289W
chrXV	853046	854780	1735	1736	853300	221	28.2289	2.32143	26.7013	ubc92KR_IP_2_peak_611a	Promoter (<=1kb)	15	852121	853077	957	2	854462	NM_001183707	0	MPD1	protein disulfide isomerase MPD1	protein_coding	NP_014931.3	YOR288C
chrXV	832041	832851	811	812	832384	518	84.4827	2.70421	82.8638	ubc92KR_IP_1_peak_617	Promoter (<=1kb)	15	831059	832042	984	2	854445	NM_001183690	0	FSF1	Fsf1p	protein_coding	NP_014914.1	YOR271C
chrXV	778422	781020	2599	2600	779940	2989	2358.97	15.5792	2355.91	ubc92KR_IP_1_peak_616	Promoter (<=1kb)	15	778555	779405	851	2	854409	NM_001183653	0	RPL33B	ribosomal 60S subunit protein L33B	protein_coding	NP_014877.3	YOR234C
chrXV	723433	723801	369	370	723696	250	4.72976	1.30781	3.54072	ubc92KR_IP_1_peak_614	Promoter (<=1kb)	15	722911	724725	1815	1	854379	NM_001183623	522	DED1	DEAD-box ATP-dependent RNA helicase DED1	protein_coding	NP_014847.3	YOR204W
chrXV	677898	679981	2084	2085	679010	2503	1796.42	13.0469	1793.59	ubc92KR_IP_1_peak_612	Promoter (<=1kb)	15	678191	678793	603	2	854354	NM_001183601	0	RPS30B	ribosomal 40S subunit protein S30B	protein_coding	NP_014825.3	YOR182C
chrXV	504499	506964	2466	2467	505313	2692	2827.34	29.1017	2823.72	ubc92KR_IP_2_peak_600a	Promoter (<=1kb)	15	505794	506767	974	1	854263	NM_001183515	0	RPS7A	ribosomal 40S subunit protein S7A	protein_coding	NP_014739.1	YOR096W
chrXV	504198	507006	2809	2810	505315	3997	3630.08	20.8313	3626.66	ubc92KR_IP_1_peak_607a	Promoter (<=1kb)	15	503552	504328	777	2	854262	NM_001183514	0	RKI1	ribose-5-phosphate isomerase RKI1	protein_coding	NP_014738.1	YOR095C
chrXV	444566	446339	1774	1775	445041	624	135.011	3.25651	133.281	ubc92KR_IP_1_peak_604a	Promoter (<=1kb)	15	444686	445849	1164	1	854229	NM_001183482	0	RPL3	ribosomal 60S subunit protein L3	protein_coding	NP_014706.1	YOR063W
chrXV	407855	408427	573	574	408098	159	10.2111	1.72903	8.85648	ubc92KR_IP_2_peak_595	Promoter (<=1kb)	15	408425	409660	1236	1	854206	NM_001183461	0	CUE5	ubiquitin-binding protein CUE5	protein_coding	NP_014685.1	YOR042W
chrXV	339730	341000	1271	1272	340353	1333	631.756	6.9507	629.521	ubc92KR_IP_1_peak_599	Promoter (<=1kb)	15	338938	339978	1041	2	854168	NM_001183426	0	SGT2	Sgt2p	protein_coding	NP_014649.1	YOR007C
chrXV	326408	326901	494	495	326596	306	9.89622	1.46307	8.63414	ubc92KR_IP_1_peak_598	Promoter (<=1kb)	15	326832	329033	2202	1	854162	NM_001183420	0	RRP6	exosome nuclease subunit RRP6	protein_coding	NP_014643.1	YOR001W
chrXV	305194	305568	375	376	305423	280	9.18427	1.46413	7.93039	ubc92KR_IP_1_peak_597	Promoter (<=1kb)	15	305349	307409	2061	1	854151	NM_001183265	0	PLB3	lysophospholipase	protein_coding	NP_014632.1	YOL011W
chrXV	274120	275206	1087	1088	274669	1143	477.471	5.96072	475.361	ubc92KR_IP_1_peak_593	Promoter (<=1kb)	15	274012	274353	342	2	854131	NM_001183280	0	MIM1	Mim1p	protein_coding	NP_014616.1	YOL026C
chrXV	252926	254817	1892	1893	253953	1110	763.591	12.006	760.993	ubc92KR_IP_2_peak_588	Promoter (<=1kb)	15	253149	253577	429	2	854117	NM_001183294	0	RPS15	ribosomal 40S subunit protein S15	protein_coding	NP_014602.1	YOL040C
chrXV	219093	220429	1337	1338	219507	136	5.25329	1.48048	3.99111	ubc92KR_IP_2_peak_585a	Promoter (<=1kb)	15	219211	220473	1263	1	854096	NM_001183313	0	ARG1	argininosuccinate synthase	protein_coding	NP_014583.2	YOL058W
chrXV	217445	218085	641	642	217788	238	3.3542	1.24529	2.19549	ubc92KR_IP_1_peak_588a	Promoter (<=1kb)	15	217126	218448	1323	1	854095	NM_001183314	319	GPD2	glycerol-3-phosphate dehydrogenase (NAD(+)) GPD2	protein_coding	NP_014582.1	YOL059W
chrXV	206102	207145	1044	1045	206378	149	7.87273	1.62097	6.55563	ubc92KR_IP_2_peak_584a	Promoter (<=1kb)	15	206103	207176	1074	2	854090	NM_001183319	31	MET22	3'(2'),5'-bisphosphate nucleotidase	protein_coding	NP_014577.1	YOL064C
chrXV	167502	168665	1164	1165	168082	872	259.645	4.21836	257.756	ubc92KR_IP_1_peak_587	Promoter (<=1kb)	15	168727	169974	1248	1	854072	NM_001183336	-62	ATG19	Atg19p	protein_coding	NP_014559.1	YOL082W
chrXV	159184	161409	2226	2227	159637	258	45.6802	2.79887	44.0498	ubc92KR_IP_2_peak_582a	Promoter (<=1kb)	15	159548	160594	1047	2	854068	NM_001183340	0	ADH1	alcohol dehydrogenase ADH1	protein_coding	NP_014555.1	YOL086C
chrXV	109832	111795	1964	1965	111055	2016	1274.05	10.5094	1271.45	ubc92KR_IP_1_peak_584	Promoter (<=1kb)	15	110297	110638	342	1	854040	NM_001183363	0	ZEO1	Zeo1p	protein_coding	NP_014532.1	YOL109W
chrXV	91796	95410	3615	3616	93105	2859	2204.88	14.9018	2201.88	ubc92KR_IP_1_peak_583a	Promoter (<=1kb)	15	92026	92850	825	2	854028	NM_001183375	0	RPS19A	ribosomal 40S subunit protein S19A	protein_coding	NP_014520.1	YOL121C
chrXV	87244	88059	816	817	87500	374	28.1011	1.87463	26.6974	ubc92KR_IP_1_peak_582	Promoter (<=1kb)	15	87844	89448	1605	1	853997	NM_001183377	0	HRP1	Hrp1p	protein_coding	NP_014518.1	YOL123W
chrXV	79424	81473	2050	2051	79953	1813	1070.78	9.4517	1068.27	ubc92KR_IP_1_peak_581a	Promoter (<=1kb)	15	78352	79479	1128	2	853992	NM_001183382	0	YGK3	serine/threonine protein kinase YGK3	protein_coding	NP_014513.1	YOL128C
chrXV	32941	33485	545	546	33160	127	3.73579	1.38322	2.51669	ubc92KR_IP_2_peak_576a	Promoter (1-2kb)	15	34658	35407	750	1	854011	NM_001183407	-1173	ZPS1	Zps1p	protein_coding	NP_014488.1	YOL154W
chrXV	31632	32594	963	964	31739	123	3.1429	1.34	1.94382	ubc92KR_IP_2_peak_575a	Promoter (<=1kb)	15	28703	31606	2904	2	854010	NM_001183408	-26	HPF1	mannoprotein	protein_coding	NP_014487.1	YOL155C
chrXIV	733420	734058	639	640	733641	160	10.4597	1.73984	9.10142	ubc92KR_IP_2_peak_571	Promoter (<=1kb)	14	733356	734069	714	2	855794	NM_001183234	11	BIO4	dethiobiotin synthase	protein_coding	NP_014455.1	YNR057C
chrXIV	733195	734238	1044	1045	733735	406	41.3852	2.12064	39.9119	ubc92KR_IP_1_peak_578	Promoter (<=1kb)	14	731618	733303	1686	2	855793	NM_001183233	0	BIO5	Bio5p	protein_coding	NP_014454.3	YNR056C
chrXIV	715276	716572	1297	1298	715636	491	73.0413	2.56352	71.4554	ubc92KR_IP_1_peak_575a	Promoter (<=1kb)	14	714048	715388	1341	2	855786	NM_001183227	0	LYS9	saccharopine dehydrogenase (NADP+, L-glutamate-forming)	protein_coding	NP_014448.1	YNR050C
chrXIV	662326	662658	333	334	662495	169	12.8134	1.83709	11.4226	ubc92KR_IP_2_peak_568	Promoter (<=1kb)	14	662913	663581	669	1	855751	NM_001183194	-255	TIM23	protein transporter TIM23	protein_coding	NP_014414.3	YNR017W
chrXIV	654388	662683	8296	8297	654543	282	9.53071	1.47455	8.27276	ubc92KR_IP_1_peak_574a	Promoter (<=1kb)	14	654673	661374	6702	2	855750	NM_001183193	0	ACC1	acetyl-CoA carboxylase ACC1	protein_coding	NP_014413.1	YNR016C
chrXIV	654503	660072	5570	5571	654635	120	2.73207	1.30758	1.54867	ubc92KR_IP_2_peak_566a	Promoter (1-2kb)	14	653387	654541	1155	1	855749	NM_001183192	1116	SMM1	tRNA-dihydrouridine(20) synthase (NAD(+))	protein_coding	NP_014412.1	YNR015W
chrXIV	630932	633353	2422	2423	631916	2167	1431.07	11.2962	1428.39	ubc92KR_IP_1_peak_573a	Promoter (<=1kb)	14	629622	631061	1440	2	855732	NM_001183178	0	CIT1	citrate (Si)-synthase CIT1	protein_coding	NP_014398.1	YNR001C
chrXIV	628418	629205	788	789	628846	559	86.8752	2.63265	85.2504	ubc92KR_IP_1_peak_572	Promoter (<=1kb)	14	627456	628616	1161	1	855731	NM_001182840	962	DOM34	ribosome dissociation factor DOM34	protein_coding	NP_014397.1	YNL001W
chrXIV	575327	577309	1983	1984	575718	457	59.5497	2.38637	58.0075	ubc92KR_IP_1_peak_569a	Promoter (<=1kb)	14	575640	576050	411	2	855700	NM_001182870	0	HHT2	histone H3	protein_coding	NP_014367.1	YNL031C
chrXIV	569540	570242	703	704	569948	808	240.625	4.21523	238.756	ubc92KR_IP_1_peak_568	Promoter (<=1kb)	14	568522	569691	1170	2	855695	NM_001182874	0	.	uncharacterized protein	protein_coding	NP_014363.1	YNL035C
chrXIV	559309	559595	287	288	559442	293	11.5415	1.53186	10.2613	ubc92KR_IP_1_peak_565	Promoter (<=1kb)	14	559814	560479	666	1	855692	NM_001182875	-219	NCE103	carbonate dehydratase NCE103	protein_coding	NP_014362.3	YNL036W
chrXIV	523566	523969	404	405	523639	260	3.20171	1.22534	2.04824	ubc92KR_IP_1_peak_563	Promoter (2-3kb)	14	526086	529583	3498	1	855673	NM_001182893	-2117	VAC7	Vac7p	protein_coding	NP_014344.3	YNL054W
chrXIV	493607	496463	2857	2858	493973	351	24.9021	1.83407	23.5176	ubc92KR_IP_1_peak_561a	Promoter (<=1kb)	14	493956	495001	1046	2	855655	NM_001182907	0	RPL16B	ribosomal 60S subunit protein L16B	protein_coding	NP_014330.1	YNL069C
chrXIV	444013	445199	1187	1188	444549	599	270.826	6.48386	268.664	ubc92KR_IP_2_peak_552	Promoter (<=1kb)	14	443398	444315	918	2	855628	NM_001182934	0	RPS7B	ribosomal 40S subunit protein S7B	protein_coding	NP_014303.3	YNL096C
chrXIV	413957	414273	317	318	414036	236	3.1484	1.23487	1.99503	ubc92KR_IP_1_peak_559	Promoter (<=1kb)	14	413639	416281	2643	1	855611	NM_001182950	318	DBP2	DEAD-box ATP-dependent RNA helicase DBP2	protein_coding	NP_014287.3	YNL112W
chrXIV	373602	376142	2541	2542	374846	7684	9080.47	40.0421	9075.66	ubc92KR_IP_1_peak_558	Promoter (<=1kb)	14	374171	374692	522	2	855589	NM_001182971	0	FYV6	Fyv6p	protein_coding	NP_014266.3	YNL133C
chrXIV	358384	359070	687	688	358604	258	5.77844	1.3495	4.57101	ubc92KR_IP_1_peak_557a	Promoter (<=1kb)	14	359596	360639	1044	1	855581	NM_001182979	-526	AAH1	adenine deaminase	protein_coding	NP_014258.1	YNL141W
chrXIV	357194	357871	678	679	357370	314	15.8603	1.64128	14.5396	ubc92KR_IP_1_peak_556a	Promoter (<=1kb)	14	357453	358952	1500	1	855580	NM_001182980	0	MEP2	ammonium permease MEP2	protein_coding	NP_014257.1	YNL142W
chrXIV	301747	303655	1909	1910	302430	1070	421.723	5.58036	419.665	ubc92KR_IP_1_peak_554	Promoter (<=1kb)	14	302680	303402	723	1	855543	NM_001183016	0	RPS3	ribosomal 40S subunit protein S3	protein_coding	NP_014221.3	YNL178W
chrXIV	282853	283745	893	894	282936	234	2.94939	1.22445	1.80154	ubc92KR_IP_1_peak_553a	Promoter (<=1kb)	14	282395	283009	615	1	855531	NM_001183028	458	.	uncharacterized protein	protein_coding	NP_014209.1	YNL190W
chrXIV	280156	281617	1462	1463	280808	180	15.9641	1.95596	14.5375	ubc92KR_IP_2_peak_545a	Promoter (<=1kb)	14	280432	281505	1074	1	855530	NM_001183029	0	DUG3	glutamine amidotransferase subunit DUG3	protein_coding	NP_014208.1	YNL191W
chrXIV	253304	253968	665	666	253708	291	11.1627	1.52144	9.88659	ubc92KR_IP_1_peak_552	Promoter (<=1kb)	14	254418	255017	600	1	855513	NM_001183046	-450	.	uncharacterized protein	protein_coding	NP_014191.2	YNL208W
chrXIV	252119	252548	430	431	252375	268	7.23333	1.4016	6.00387	ubc92KR_IP_1_peak_551	Promoter (<=1kb)	14	252059	253900	1842	1	855512	NM_001183047	60	SSB2	Hsp70 family ATPase SSB2	protein_coding	NP_014190.1	YNL209W
chrXIV	234671	235085	415	416	234799	129	4.05128	1.40484	2.8224	ubc92KR_IP_2_peak_544	Promoter (<=1kb)	14	234413	235714	1302	1	855501	NM_001183058	258	ADE12	adenylosuccinate synthase	protein_coding	NP_014179.1	YNL220W
chrXIV	196966	198113	1148	1149	197472	178	15.3696	1.93435	13.9491	ubc92KR_IP_2_peak_542a	Promoter (<=1kb)	14	196426	197943	1518	2	855480	NM_001183079	0	ZWF1	glucose-6-phosphate dehydrogenase	protein_coding	NP_014158.1	YNL241C
chrXIV	173803	174882	1080	1081	174547	433	50.6785	2.26132	49.1681	ubc92KR_IP_1_peak_549	Promoter (<=1kb)	14	172588	174315	1728	2	855470	NM_001183089	0	NRD1	Nrd1 complex RNA-binding subunit	protein_coding	NP_014148.1	YNL251C
chrXIV	89678	90065	388	389	89760	229	2.48173	1.1984	1.34796	ubc92KR_IP_1_peak_545	Promoter (<=1kb)	14	90303	91424	1122	1	855428	NM_001183126	-238	CAF40	CCR4-NOT core subunit CAF40	protein_coding	NP_014111.1	YNL288W
chrXIV	61724	64498	2775	2776	62207	373	31.0813	1.9487	29.6595	ubc92KR_IP_1_peak_543a	Promoter (<=1kb)	14	61958	62943	986	2	855414	NM_001183140	0	RPS19B	ribosomal 40S subunit protein S19B	protein_coding	NP_014097.1	YNL302C
chrXIV	57704	58018	315	316	57811	122	3.00271	1.32919	1.80871	ubc92KR_IP_2_peak_534	Promoter (<=1kb)	14	56446	57573	1128	2	855409	NM_001183145	-131	MCK1	serine/threonine/tyrosine protein kinase MCK1	protein_coding	NP_014092.1	YNL307C
chrXIV	34419	34748	330	331	34560	154	9.00793	1.675	7.67175	ubc92KR_IP_2_peak_533	Promoter (<=1kb)	14	34696	37422	2727	1	855395	NM_001183159	0	VNX1	Vnx1p	protein_coding	NP_014078.1	YNL321W
chrXIV	6804	7146	343	344	6943	262	6.34145	1.37034	5.12494	ubc92KR_IP_1_peak_542	Promoter (<=1kb)	14	371	6098	5728	2	855377	NM_001183177	-706	YRF1-6	Y' element ATP-dependent helicase protein 1 copy 6	protein_coding	NP_014060.1	YNL339C
chrXIII	887000	888985	1986	1987	887134	280	8.92185	1.45454	7.67189	ubc92KR_IP_1_peak_541a	Promoter (<=1kb)	13	887003	888682	1680	1	855355	NM_001182818	0	GAS1	1,3-beta-glucanosyltransferase GAS1	protein_coding	NP_014038.1	YMR307W
chrXIII	872667	872939	273	274	872814	320	17.2057	1.67254	15.8737	ubc92KR_IP_1_peak_540	Promoter (<=1kb)	13	870073	872625	2553	2	855348	NM_001182811	-42	YME2	Yme2p	protein_coding	NP_014031.1	YMR302C
chrXIII	861105	861445	341	342	861283	302	13.3168	1.57876	12.0188	ubc92KR_IP_1_peak_539	Promoter (<=1kb)	13	859215	860891	1677	2	855342	NM_001182805	-214	LCB1	serine C-palmitoyltransferase LCB1	protein_coding	NP_014025.1	YMR296C
chrXIII	767883	768894	1012	1013	768434	991	363.829	5.16873	361.829	ubc92KR_IP_1_peak_536	Promoter (<=1kb)	13	763351	768039	4689	2	855289	NM_001182755	0	RKR1	ubiquitin-protein ligase RKR1	protein_coding	NP_013975.1	YMR247C
chrXIII	759343	762971	3629	3630	759916	394	37.4998	2.05811	36.0441	ubc92KR_IP_1_peak_535a	Promoter (<=1kb)	13	759807	761891	2085	1	855288	NM_001182754	0	FAA4	long-chain fatty acid-CoA ligase FAA4	protein_coding	NP_013974.1	YMR246W
chrXIII	731714	732919	1206	1207	732227	756	405.539	8.1307	403.219	ubc92KR_IP_2_peak_523	Promoter (<=1kb)	13	732414	733141	728	1	855270	NM_001182737	0	RPS10B	ribosomal 40S subunit protein S10B	protein_coding	NP_013957.1	YMR230W
chrXIII	673554	674440	887	888	673631	229	2.48173	1.1984	1.34796	ubc92KR_IP_1_peak_531a	Promoter (<=1kb)	13	671887	674766	2880	2	855245	NM_001182712	326	PFK2	6-phosphofructokinase subunit beta	protein_coding	NP_013932.1	YMR205C
chrXIII	671703	673206	1504	1505	672004	272	7.85914	1.42244	6.62129	ubc92KR_IP_1_peak_530a	Promoter (<=1kb)	13	670063	671325	1263	2	855244	NM_001182711	-378	INP1	Inp1p	protein_coding	NP_013931.1	YMR204C
chrXIII	667242	667566	325	326	667382	320	17.2057	1.67254	15.8737	ubc92KR_IP_1_peak_529	Promoter (<=1kb)	13	667537	668205	669	1	855242	NM_001182709	0	ERG2	C-8 sterol isomerase ERG2	protein_coding	NP_013929.1	YMR202W
chrXIII	586028	587347	1320	1321	586638	834	257.12	4.3507	255.233	ubc92KR_IP_1_peak_526	Promoter (<=1kb)	13	584271	586388	2118	2	855198	NM_001182667	0	INP2	Inp2p	protein_coding	NP_013886.1	YMR163C
chrXIII	556785	557299	515	516	556990	288	10.6054	1.50581	9.33518	ubc92KR_IP_1_peak_524	Promoter (<=1kb)	13	554793	556475	1683	2	855176	NM_001182647	-310	NDE1	NADH-ubiquinone reductase (H(+)-translocating) NDE1	protein_coding	NP_013865.1	YMR145C
chrXIII	552740	553216	477	478	553006	173	13.9251	1.88032	12.5207	ubc92KR_IP_2_peak_515	Promoter (<=1kb)	13	553362	554390	1029	1	855175	NM_001182646	-146	FDO1	Fdo1p	protein_coding	NP_013864.1	YMR144W
chrXIII	550217	552406	2190	2191	550362	138	5.6241	1.50209	4.35295	ubc92KR_IP_2_peak_514a	Promoter (<=1kb)	13	550206	551207	1002	2	855173	NM_001182644	0	RPL13B	ribosomal 60S subunit protein L13B	protein_coding	NP_013862.1	YMR142C
chrXIII	507356	509408	2053	2054	507477	124	3.28631	1.3508	2.08221	ubc92KR_IP_2_peak_512a	Promoter (<=1kb)	13	507502	509280	1779	2	855149	NM_001182621	0	ADE17	bifunctional phosphoribosylaminoimidazolecarboxamide formyltransferase/IMP cyclohydrolase ADE17	protein_coding	NP_013839.1	YMR120C
chrXIII	499141	501118	1978	1979	500187	384	34.3818	2.00601	32.9415	ubc92KR_IP_1_peak_521	Promoter (<=1kb)	13	499456	500688	1233	2	855143	NM_001182616	0	ASC1	guanine nucleotide-binding protein subunit beta	protein_coding	NP_013834.1	YMR116C
chrXIII	433689	435011	1323	1324	433875	276	8.50959	1.44329	7.26362	ubc92KR_IP_1_peak_518a	Promoter (<=1kb)	13	434788	435915	1128	1	855107	NM_001182582	0	ADH3	alcohol dehydrogenase ADH3	protein_coding	NP_013800.1	YMR083W
chrXIII	362592	363781	1190	1191	363038	2721	2044.12	14.1828	2041.19	ubc92KR_IP_1_peak_514	Promoter (<=1kb)	13	357359	362627	5269	2	855062	NM_001182542	0	.	gag-pol fusion protein	protein_coding	NP_013759.1	YMR045C
chrXIII	351814	352930	1117	1118	352271	1119	458.913	5.83567	456.82	ubc92KR_IP_1_peak_513	Promoter (<=1kb)	13	350966	351973	1008	2	855057	NM_001182538	0	ARA2	D-arabinose 1-dehydrogenase (NAD(P)(+)) ARA2	protein_coding	NP_013755.1	YMR041C
chrXIII	320706	321738	1033	1034	321190	1077	426.977	5.61683	424.914	ubc92KR_IP_1_peak_512	Promoter (<=1kb)	13	319437	321017	1581	2	855037	NM_001182519	0	MSS1	Mss1p	protein_coding	NP_013736.1	YMR023C
chrXIII	308220	309664	1445	1446	308939	936	325.125	4.88216	323.164	ubc92KR_IP_1_peak_511	Promoter (<=1kb)	13	310208	311752	1545	1	855032	NM_001182514	-544	PEX9	Pex9p	protein_coding	NP_013731.1	YMR018W
chrXIII	296780	298940	2161	2162	297169	569	107.729	2.96994	106.051	ubc92KR_IP_1_peak_510a	Promoter (<=1kb)	13	298868	300427	1560	1	855028	NM_001182510	0	BUD22	Bud22p	protein_coding	NP_013727.1	YMR014W
chrXIII	267617	268847	1231	1232	268129	932	303.087	4.57838	301.149	ubc92KR_IP_1_peak_508	Promoter (<=1kb)	13	267174	267800	627	1	855012	NM_001182356	443	YPT7	Rab family GTPase YPT7	protein_coding	NP_013713.1	YML001W
chrXIII	222688	226980	4293	4294	224189	2377	1593.19	11.5873	1590.44	ubc92KR_IP_1_peak_506a	Promoter (<=1kb)	13	222987	223828	842	2	854982	NM_001182384	0	RPS18B	ribosomal 40S subunit protein S18B	protein_coding	NP_013686.1	YML026C
chrXIII	195623	196520	898	899	196190	1358	652.97	7.08096	650.718	ubc92KR_IP_1_peak_505	Promoter (<=1kb)	13	194913	195755	843	2	854966	NM_001182399	0	VPS71	Vps71p	protein_coding	NP_013671.1	YML041C
chrXIII	161940	164355	2416	2417	162094	273	8.01948	1.42765	6.77961	ubc92KR_IP_1_peak_502a	Promoter (<=1kb)	13	162194	164176	1983	2	854948	NM_001182414	0	IMD4	IMP dehydrogenase IMD4	protein_coding	NP_013656.1	YML056C
chrXIII	159162	159799	638	639	159458	367	29.3394	1.91743	27.9273	ubc92KR_IP_1_peak_501	Promoter (<=1kb)	13	159383	159697	315	1	854945	NM_001182417	0	SML1	ribonucleotide reductase inhibiting protein SML1	protein_coding	NP_013653.1	YML058W
chrXIII	145063	147509	2447	2448	146120	4221	3928.67	21.9984	3925.16	ubc92KR_IP_1_peak_500a	Promoter (<=1kb)	13	145139	145876	738	2	854938	NM_001182423	0	TEM1	Ras family GTPase TEM1	protein_coding	NP_013647.1	YML064C
chrXIII	131371	132364	994	995	131869	1211	531.224	6.31502	529.069	ubc92KR_IP_1_peak_499	Promoter (<=1kb)	13	129749	131572	1824	2	854904	NM_001182430	0	COG8	Golgi transport complex subunit COG8	protein_coding	NP_013640.1	YML071C
chrXIII	122961	125664	2704	2705	124482	4659	4527.2	24.2805	4523.52	ubc92KR_IP_1_peak_498	Promoter (<=1kb)	13	123227	124172	946	2	854902	NM_001182432	0	RPL6A	ribosomal 60S subunit protein L6A	protein_coding	NP_013638.1	YML073C
chrXIII	23769	25821	2053	2054	24052	154	9.00793	1.675	7.67175	ubc92KR_IP_2_peak_485a	Promoter (<=1kb)	13	24037	25800	1764	2	854916	NM_001182486	0	PHO84	phosphate transporter PHO84	protein_coding	NP_013583.1	YML123C
chrXIII	23683	26014	2332	2333	23945	388	35.6157	2.02685	34.1689	ubc92KR_IP_1_peak_495a	Promoter (<=1kb)	13	22048	23683	1636	2	854915	NM_001182487	0	TUB3	alpha-tubulin TUB3	protein_coding	NP_013582.1	YML124C
chrXII	1064083	1065284	1202	1203	1064506	324	18.1292	1.69339	16.79	ubc92KR_IP_1_peak_494a	Promoter (<=1kb)	12	1065956	1066564	609	1	851184	NM_001182350	-672	.	uncharacterized protein	protein_coding	NP_013567.3	YLR462W
chrXII	1027868	1029982	2115	2116	1028443	1081	429.988	5.63767	427.922	ubc92KR_IP_1_peak_492a	Promoter (<=1kb)	12	1026856	1027893	1038	2	851168	NM_001182335	0	VMA6	H(+)-transporting V0 sector ATPase subunit d	protein_coding	NP_013552.3	YLR447C
chrXII	1017788	1020038	2251	2252	1018323	458	59.9313	2.39158	58.3878	ubc92KR_IP_1_peak_491a	Promoter (<=1kb)	12	1018141	1018908	768	2	851162	NM_001182329	0	RPS1A	ribosomal 40S subunit protein S1A	protein_coding	NP_013546.1	YLR441C
chrXII	1002051	1002990	940	941	1002410	336	21.0252	1.75591	19.666	ubc92KR_IP_1_peak_490	Promoter (<=1kb)	12	1002557	1004128	1572	1	851152	NM_001182320	0	IMD3	IMP dehydrogenase IMD3	protein_coding	NP_013536.3	YLR432W
chrXII	952445	952878	434	435	952657	152	8.54561	1.65338	7.21711	ubc92KR_IP_2_peak_478	Promoter (1-2kb)	12	953353	954144	792	2	851132	NM_001182302	1266	PUN1	Pun1p	protein_coding	NP_013518.3	YLR414C
chrXII	950943	953612	2670	2671	951250	348	24.1044	1.81844	22.7251	ubc92KR_IP_1_peak_487a	Promoter (<=1kb)	12	951156	953183	2028	1	851131	NM_001182301	0	INA1	Ina1p	protein_coding	NP_013517.1	YLR413W
chrXII	897112	899524	2413	2414	897908	1446	729.207	7.53947	726.898	ubc92KR_IP_1_peak_485a	Promoter (<=1kb)	12	896374	897672	1299	2	851103	NM_001182276	0	REH1	Reh1p	protein_coding	NP_013491.1	YLR387C
chrXII	874664	876256	1593	1594	875365	2046	1304.87	10.6657	1302.25	ubc92KR_IP_1_peak_484	Promoter (<=1kb)	12	873746	874792	1047	2	851092	NM_001182266	0	FBP1	fructose 1,6-bisphosphate 1-phosphatase	protein_coding	NP_013481.3	YLR377C
chrXII	855687	857330	1644	1645	855974	307	14.3525	1.60481	13.0452	ubc92KR_IP_1_peak_483a	Promoter (<=1kb)	12	856442	857317	876	1	851082	NM_001182256	0	RPS22B	ribosomal 40S subunit protein S22B	protein_coding	NP_013471.1	YLR367W
chrXII	837074	839635	2562	2563	837149	230	2.5718	1.20361	1.43514	ubc92KR_IP_1_peak_482a	Promoter (<=1kb)	12	836350	837357	1008	2	851068	NM_001182243	0	TAL1	sedoheptulose-7-phosphate:D-glyceraldehyde-3-phosphate transaldolase TAL1	protein_coding	NP_013458.1	YLR354C
chrXII	810436	811917	1482	1483	810526	239	3.45957	1.2505	2.29817	ubc92KR_IP_1_peak_479a	Promoter (<=1kb)	12	809997	815627	5631	1	851055	NM_001182231	439	FKS1	1,3-beta-D-glucan synthase	protein_coding	NP_013446.1	YLR342W
chrXII	804995	807081	2087	2088	805640	1425	710.797	7.43005	708.5	ubc92KR_IP_1_peak_478	Promoter (<=1kb)	12	802653	805106	2454	2	851051	NM_001182226	0	VRP1	Vrp1p	protein_coding	NP_013441.1	YLR337C
chrXII	780589	782549	1961	1962	781654	3248	2673.19	16.9286	2670.03	ubc92KR_IP_1_peak_475	Promoter (<=1kb)	12	781143	781379	237	2	851035	NM_001182214	0	RPL38	ribosomal 60S subunit protein L38	protein_coding	NP_013429.1	YLR325C
chrXII	728712	730694	1983	1984	729112	278	8.84389	1.45371	7.59397	ubc92KR_IP_1_peak_473a	Promoter (<=1kb)	12	728955	730301	1347	1	851007	NM_001182188	0	EXG1	glucan 1,3-beta-glucosidase	protein_coding	NP_013403.1	YLR300W
chrXII	721345	721805	461	462	721424	233	2.81652	1.21709	1.67407	ubc92KR_IP_1_peak_472	Promoter (<=1kb)	12	720771	721430	660	2	851000	NM_001182181	0	GSP1	Ran GTPase GSP1	protein_coding	NP_013396.1	YLR293C
chrXII	720666	721008	343	344	720906	244	4.01193	1.27655	2.83742	ubc92KR_IP_1_peak_471	Promoter (<=1kb)	12	719789	720370	582	2	850999	NM_001182180	-296	SEC72	Sec63 complex subunit SEC72	protein_coding	NP_013395.1	YLR292C
chrXII	712279	714286	2008	2009	713360	2585	1888.66	13.4741	1885.79	ubc92KR_IP_1_peak_470	Promoter (<=1kb)	12	712537	713158	622	2	850994	NM_001182175	0	RPS30A	ribosomal 40S subunit protein S30A	protein_coding	NP_013390.1	YLR287C-A
chrXII	658743	659092	350	351	658821	230	2.5718	1.20361	1.43514	ubc92KR_IP_1_peak_467	Promoter (<=1kb)	12	658826	659791	966	1	850961	NM_001182144	0	.	uncharacterized protein	protein_coding	NP_013358.1	YLR257W
chrXII	636651	640022	3372	3373	637176	572	109.16	2.98557	107.479	ubc92KR_IP_1_peak_465a	Promoter (<=1kb)	12	636780	639914	3135	1	850951	NM_001182136	0	YEF3	translation elongation factor EF-3	protein_coding	NP_013350.1	YLR249W
chrXII	591996	592998	1003	1004	592603	756	404.353	8.09773	402.035	ubc92KR_IP_2_peak_456	Promoter (<=1kb)	12	590562	592043	1482	2	850924	NM_001182114	0	ADY4	Ady4p	protein_coding	NP_013328.1	YLR227C
chrXII	521222	523653	2432	2433	522365	2895	2247.3	15.0894	2244.28	ubc92KR_IP_1_peak_461	Promoter (<=1kb)	12	520543	522012	1470	2	850880	NM_001182070	0	TOS4	Tos4p	protein_coding	NP_013284.1	YLR183C
chrXII	515281	516722	1442	1443	515375	248	4.48382	1.29739	3.29942	ubc92KR_IP_1_peak_460a	Promoter (<=1kb)	12	515262	516410	1149	1	850877	NM_001182067	19	SAM1	methionine adenosyltransferase SAM1	protein_coding	NP_013281.1	YLR180W
chrXII	506313	507485	1173	1174	506407	252	4.98217	1.31824	3.78851	ubc92KR_IP_1_peak_459a	Promoter (<=1kb)	12	506134	507585	1452	1	850872	NM_001182062	179	CBF5	pseudouridine synthase CBF5	protein_coding	NP_013276.1	YLR175W
chrXII	497755	500201	2447	2448	498677	3016	2325.64	14.9037	2322.59	ubc92KR_IP_1_peak_458	Promoter (<=1kb)	12	495429	498044	2616	2	850863	NM_001182053	0	SEC10	exocyst subunit SEC10	protein_coding	NP_013267.1	YLR166C
chrXII	489200	489960	761	762	489449	1079	428.482	5.62725	426.417	ubc92KR_IP_1_peak_457	Promoter (<=1kb)	12	489573	489929	357	1	850859	NM_001182049	0	.	uncharacterized protein	protein_coding	NP_013263.1	YLR162W
chrXII	447886	449918	2033	2034	448704	1296	561.273	6.22383	559.095	ubc92KR_IP_1_peak_453a	Promoter (<=1kb)	12	447982	448314	333	2	850847	NM_001182041	0	RNH203	Rnh203p	protein_coding	NP_013255.1	YLR154C
chrXII	446910	447546	637	638	447013	242	3.78593	1.26613	2.61663	ubc92KR_IP_1_peak_452a	Promoter (<=1kb)	12	445524	447575	2052	2	850846	NM_001182040	29	ACS2	acetate--CoA ligase ACS2	protein_coding	NP_013254.1	YLR153C
chrXII	440498	441501	1004	1005	441157	334	18.9658	1.7023	17.6212	ubc92KR_IP_1_peak_451	Promoter (<=1kb)	12	440467	441288	822	1	850843	NM_001182037	31	STM1	Stm1p	protein_coding	NP_013251.1	YLR150W
chrXII	424350	424630	281	282	424451	242	3.78593	1.26613	2.61663	ubc92KR_IP_1_peak_449	Promoter (<=1kb)	12	425186	426616	1431	1	850833	NM_001182029	-556	PUT1	proline dehydrogenase	protein_coding	NP_013243.1	YLR142W
chrXII	369054	372238	3185	3186	369761	979	346.091	4.97155	344.109	ubc92KR_IP_1_peak_447a	Promoter (<=1kb)	12	369697	370098	402	2	850800	NM_001181997	0	CCW12	Ccw12p	protein_coding	NP_013211.1	YLR110C
chrXII	331979	332292	314	315	332163	257	5.64168	1.34429	4.43657	ubc92KR_IP_1_peak_444	Promoter (<=1kb)	12	329677	332115	2439	2	850784	NM_001181982	0	IOC2	Ioc2p	protein_coding	NP_013196.1	YLR095C
chrXII	322959	326646	3688	3689	323505	244	39.4981	2.64758	37.9009	ubc92KR_IP_2_peak_439a	Promoter (<=1kb)	12	323544	326225	2682	1	850781	NM_001181979	0	SUL2	sulfate permease	protein_coding	NP_013193.1	YLR092W
chrXII	281901	283915	2015	2016	282676	1065	715.196	11.5197	712.633	ubc92KR_IP_2_peak_438	Promoter (<=1kb)	12	281956	282456	501	2	850763	NM_001181961	0	BUD20	Bud20p	protein_coding	NP_013175.1	YLR074C
chrXII	281559	284104	2546	2547	282679	1963	1220.09	10.2333	1217.51	ubc92KR_IP_1_peak_443	Promoter (<=1kb)	12	281019	281621	603	2	850762	NM_001181960	0	RFU1	Rfu1p	protein_coding	NP_013174.1	YLR073C
chrXII	261924	264159	2236	2237	262974	1312	614.094	6.84128	611.873	ubc92KR_IP_1_peak_442	Promoter (<=1kb)	12	263194	263948	755	1	850750	NM_001181948	0	RPL22A	ribosomal 60S subunit protein L22A	protein_coding	NP_013162.1	YLR061W
chrXII	257570	259617	2048	2049	258074	258	45.6802	2.79887	44.0498	ubc92KR_IP_2_peak_436a	Promoter (<=1kb)	12	257992	259401	1410	2	850747	NM_001181945	0	SHM2	glycine hydroxymethyltransferase SHM2	protein_coding	NP_013159.1	YLR058C
chrXII	253103	253664	562	563	253320	325	18.3635	1.6986	17.0223	ubc92KR_IP_1_peak_441	Promoter (<=1kb)	12	251272	253080	1809	2	850744	NM_001181942	-23	SPT8	SAGA complex subunit SPT8	protein_coding	NP_013156.1	YLR055C
chrXII	240665	243950	3286	3287	241846	5975	6396.47	30.76	6392.35	ubc92KR_IP_1_peak_440	Promoter (<=1kb)	12	239347	241407	2061	2	850736	NM_001181934	0	FRE8	putative ferric-chelate reductase	protein_coding	NP_013148.1	YLR047C
chrXII	232093	234761	2669	2670	232995	498	68.0204	2.44867	66.4506	ubc92KR_IP_1_peak_439a	Promoter (<=1kb)	12	232390	234081	1692	2	850733	NM_001181931	0	PDC1	indolepyruvate decarboxylase 1	protein_coding	NP_013145.1	YLR044C
chrXII	231978	234370	2393	2394	232569	219	27.1945	2.28835	25.675	ubc92KR_IP_2_peak_433a	Promoter (<=1kb)	12	231702	232013	312	2	850732	NM_001181930	0	TRX1	thioredoxin TRX1	protein_coding	NP_013144.1	YLR043C
chrXII	214240	215310	1071	1072	214975	2272	1542.97	11.8433	1540.24	ubc92KR_IP_1_peak_438	Promoter (<=1kb)	12	212369	214456	2088	2	850722	NM_001181922	0	MLH2	mismatch repair protein MLH2	protein_coding	NP_013135.1	YLR035C
chrXII	201518	203175	1658	1659	202163	533	91.1038	2.78236	89.4672	ubc92KR_IP_1_peak_437a	Promoter (<=1kb)	12	201976	202590	615	2	850716	NM_001181916	0	RPL15A	ribosomal 60S subunit protein L15A	protein_coding	NP_013129.1	YLR029C
chrXII	194153	194514	362	363	194378	147	7.43808	1.59935	6.12888	ubc92KR_IP_2_peak_429	Promoter (<=1kb)	12	194452	195174	723	1	850712	NM_001181912	0	SNF7	ESCRT-III subunit protein SNF7	protein_coding	NP_013125.1	YLR025W
chrXII	167246	168489	1244	1245	168032	1495	751.6	7.51097	749.277	ubc92KR_IP_1_peak_435	Promoter (<=1kb)	12	167320	167802	483	2	850696	NM_001181897	0	TEN1	Ten1p	protein_coding	NP_013110.1	YLR010C
chrXII	151084	151531	448	449	151342	280	9.18427	1.46413	7.93039	ubc92KR_IP_1_peak_434	Promoter (2-3kb)	12	151389	153977	2589	2	850687	NM_001181888	2446	.	uncharacterized protein	protein_coding	NP_013101.1	YLR001C
chrXII	72994	73523	530	531	73276	387	35.3055	2.02164	33.8603	ubc92KR_IP_1_peak_432	Promoter (<=1kb)	12	70633	73146	2514	2	850625	NM_001181854	0	RIX7	putative AAA family ATPase RIX7	protein_coding	NP_013066.1	YLL034C
chrXII	63664	64156	493	494	63848	363	28.2015	1.89659	26.7962	ubc92KR_IP_1_peak_431	Promoter (<=1kb)	12	54211	63645	9435	2	850619	NM_001181860	-19	VPS13	membrane morphogenesis protein VPS13	protein_coding	NP_013060.1	YLL040C
chrXII	47648	49812	2165	2166	48929	2999	2370.93	15.6312	2367.86	ubc92KR_IP_1_peak_430	Promoter (<=1kb)	12	47859	48629	771	2	850682	NM_001181865	0	RPL8B	ribosomal 60S subunit protein L8B	protein_coding	NP_013055.1	YLL045C
chrXII	18789	19153	365	366	19136	123	3.1429	1.34	1.94382	ubc92KR_IP_2_peak_422	Promoter (<=1kb)	12	17956	19707	1752	1	850665	NM_001181881	833	MMP1	S-methylmethionine permease MMP1	protein_coding	NP_013039.1	YLL061W
chrXII	16596	17095	500	501	16884	126	3.58276	1.37242	2.36859	ubc92KR_IP_2_peak_421	Promoter (<=1kb)	12	16639	17613	975	2	850664	NM_001181882	518	MHT1	S-adenosylmethionine-homocysteine S-methyltransferase MHT1	protein_coding	NP_013038.1	YLL062C
chrXII	11166	12030	865	866	11821	451	57.2797	2.35511	55.7452	ubc92KR_IP_1_peak_429	Promoter (1-2kb)	12	6120	9836	3717	2	850660	NM_001181886	-1330	.	Y' element ATP-dependent helicase	protein_coding	NP_013034.1	YLL066C
chrXII	45	375	331	332	184	758	209.933	3.95471	208.1	ubc92KR_IP_1_peak_427	Downstream (<1kb)	12	585	4301	3717	2	850659	NM_001181887	3926	.	Y' element ATP-dependent helicase	protein_coding	NP_013033.1	YLL067C
chrXI	665711	666387	677	678	666156	403	40.3994	2.10501	38.9303	ubc92KR_IP_1_peak_426	Distal Intergenic	11	661442	663289	1848	1	853981	NM_001179896	4269	GEX2	glutathione exchanger	protein_coding	NP_013032.1	YKR106W
chrXI	617747	619784	2038	2039	618988	1721	981.839	8.97234	979.382	ubc92KR_IP_1_peak_425	Promoter (<=1kb)	11	617996	618750	755	2	853969	NM_001179884	0	RPL40B	ubiquitin-ribosomal 60S subunit protein L40B fusion protein	protein_coding	NP_013020.3	YKR094C
chrXI	571592	573268	1677	1678	572045	211	26.3276	2.29096	24.8136	ubc92KR_IP_2_peak_414a	Promoter (<=1kb)	11	571612	573393	1782	1	853943	NM_001179859	0	MET1	uroporphyrinogen-III C-methyltransferase	protein_coding	NP_012995.3	YKR069W
chrXI	552039	552350	312	313	552159	253	5.11085	1.32345	3.91488	ubc92KR_IP_1_peak_422	Promoter (<=1kb)	11	551657	552242	586	1	853931	NM_001179847	382	RPS21A	ribosomal 40S subunit protein S21A	protein_coding	NP_012983.3	YKR057W
chrXI	519572	520964	1393	1394	519814	273	8.01948	1.42765	6.77961	ubc92KR_IP_1_peak_421a	Promoter (<=1kb)	11	519527	520624	1098	1	853916	NM_001179832	45	UTH1	SUN family protein UTH1	protein_coding	NP_012968.4	YKR042W
chrXI	514706	517336	2631	2632	515024	588	113.513	3.00942	111.823	ubc92KR_IP_1_peak_419a	Promoter (<=1kb)	11	515063	516871	1809	1	853912	NM_001179829	0	GAP1	amino acid permease GAP1	protein_coding	NP_012965.3	YKR039W
chrXI	512773	514223	1451	1452	513054	304	13.7269	1.58918	12.4252	ubc92KR_IP_1_peak_418a	Promoter (<=1kb)	11	511999	513159	1161	2	853910	NM_001179828	0	KAE1	tRNA N6-adenosine threonylcarbamoyltransferase	protein_coding	NP_012964.2	YKR038C
chrXI	438919	439365	447	448	439057	295	11.926	1.54228	10.6418	ubc92KR_IP_1_peak_414	Promoter (<=1kb)	11	438777	439385	609	2	853869	NM_001179567	20	MET14	adenylyl-sulfate kinase	protein_coding	NP_012925.3	YKL001C
chrXI	439874	440521	648	649	440125	327	17.07	1.65879	15.7398	ubc92KR_IP_1_peak_415	Promoter (<=1kb)	11	438777	439385	609	2	853869	NM_001179567	-489	MET14	adenylyl-sulfate kinase	protein_coding	NP_012925.3	YKL001C
chrXI	430886	432729	1844	1845	431055	317	16.527	1.65691	15.2005	ubc92KR_IP_1_peak_413a	Promoter (<=1kb)	11	431906	432720	815	1	853864	NM_001179572	0	RPL14A	ribosomal 60S subunit protein L14A	protein_coding	NP_012920.1	YKL006W
chrXI	384770	386035	1266	1267	385393	711	366.61	7.69418	364.33	ubc92KR_IP_2_peak_405	Promoter (<=1kb)	11	385758	387206	1449	1	853840	NM_001179594	0	TFA1	transcription factor TFIIE subunit TFA1	protein_coding	NP_012897.3	YKL028W
chrXI	384307	386237	1931	1932	384625	248	4.48382	1.29739	3.29942	ubc92KR_IP_1_peak_412a	Promoter (<=1kb)	11	382716	384725	2010	2	853839	NM_001179595	0	MAE1	malate dehydrogenase (oxaloacetate-decarboxylating)	protein_coding	NP_012896.1	YKL029C
chrXI	334079	335050	972	973	334554	401	39.7474	2.09459	38.2813	ubc92KR_IP_1_peak_410	Promoter (<=1kb)	11	334412	334915	504	2	853809	NM_001179622	0	TMA19	Tma19p	protein_coding	NP_012867.1	YKL056C
chrXI	325962	328070	2109	2110	326562	560	103.478	2.92304	101.81	ubc92KR_IP_1_peak_409a	Promoter (<=1kb)	11	326408	327487	1080	2	853805	NM_001179626	0	FBA1	fructose-bisphosphate aldolase FBA1	protein_coding	NP_012863.1	YKL060C
chrXI	282669	284779	2111	2112	283059	300	12.9124	1.56834	11.6182	ubc92KR_IP_1_peak_405a	Promoter (<=1kb)	11	282891	284455	1565	1	853781	NM_001179647	0	TEF4	translation elongation factor EF1B gamma	protein_coding	NP_012842.1	YKL081W
chrXI	163530	165250	1721	1722	163945	561	103.947	2.92825	102.278	ubc92KR_IP_1_peak_401a	Promoter (<=1kb)	11	163642	164385	744	2	853705	NM_001179718	0	GPM1	phosphoglycerate mutase GPM1	protein_coding	NP_012770.1	YKL152C
chrXI	157861	159531	1671	1672	158425	1054	409.787	5.49699	407.741	ubc92KR_IP_1_peak_399a	Promoter (<=1kb)	11	158613	159212	600	1	853700	NM_001179722	0	RPS27A	ribosomal 40S subunit protein S27A	protein_coding	NP_012766.1	YKL156W
chrXI	140320	141561	1242	1243	140965	793	231.273	4.13707	229.415	ubc92KR_IP_1_peak_398a	Promoter (<=1kb)	11	137932	140691	2760	2	853690	NM_001179731	0	MCD4	mannose-ethanolamine phosphotransferase MCD4	protein_coding	NP_012756.1	YKL165C
chrXI	108031	110455	2425	2426	108944	2701	1963.24	13.3535	1960.34	ubc92KR_IP_1_peak_397a	Promoter (<=1kb)	11	109269	110129	861	1	853674	NM_001179746	0	RPL17A	ribosomal 60S subunit protein L17A	protein_coding	NP_012741.1	YKL180W
chrXI	107232	107749	518	519	107366	279	9.01333	1.45892	7.76145	ubc92KR_IP_1_peak_396a	Promoter (<=1kb)	11	107316	108599	1284	1	853654	NM_001179747	0	PRS1	ribose phosphate diphosphokinase subunit PRS1	protein_coding	NP_012740.1	YKL181W
chrXI	99835	106881	7047	7048	99986	244	4.01193	1.27655	2.83742	ubc92KR_IP_1_peak_395a	Promoter (<=1kb)	11	100671	106826	6156	1	853653	NM_001179748	0	FAS1	tetrafunctional fatty acid synthase subunit FAS1	protein_coding	NP_012739.1	YKL182W
chrXI	46179	47200	1022	1023	46804	1017	382.591	5.3042	380.572	ubc92KR_IP_1_peak_392	Promoter (<=1kb)	11	42423	46295	3873	2	853671	NM_001179774	0	STE6	ATP-binding cassette a-factor transporter STE6	protein_coding	NP_012713.1	YKL209C
chrXI	38229	39182	954	955	38652	494	74.2815	2.57916	72.6921	ubc92KR_IP_1_peak_391	Promoter (<=1kb)	11	39163	42237	3075	1	853670	NM_001179775	0	UBA1	E1 ubiquitin-activating protein UBA1	protein_coding	NP_012712.1	YKL210W
chrXI	24891	26360	1470	1471	25049	329	19.3132	1.71944	17.9653	ubc92KR_IP_1_peak_390a	Promoter (<=1kb)	11	25215	26159	945	1	853664	NM_001179781	0	URA1	dihydroorotate dehydrogenase	protein_coding	NP_012706.1	YKL216W
chrXI	141	954	814	815	251	272	7.85914	1.42244	6.62129	ubc92KR_IP_1_peak_389a	Promoter (1-2kb)	11	1810	2181	372	2	853656	NM_001179789	1227	PAU16	seripauperin PAU16	protein_coding	NP_012698.1	YKL224C
chrX	744979	745501	523	524	745212	579	112.525	3.02204	110.837	ubc92KR_IP_1_peak_388	Promoter (<=1kb)	10	742848	743999	1152	2	853626	NM_001181819	-980	COS5	Cos5p	protein_coding	NP_012695.3	YJR161C
chrX	701905	704349	2445	2446	702023	312	15.4227	1.63086	14.1059	ubc92KR_IP_1_peak_387a	Promoter (<=1kb)	10	702027	703068	1042	2	853610	NM_001181803	0	RPS4A	ribosomal 40S subunit protein S4A	protein_coding	NP_012679.3	YJR145C
chrX	689453	690822	1370	1371	689751	126	3.58276	1.37242	2.36859	ubc92KR_IP_2_peak_379a	Promoter (<=1kb)	10	689445	690524	1080	2	853604	NM_001181797	0	HOM6	homoserine dehydrogenase	protein_coding	NP_012673.3	YJR139C
chrX	678853	682273	3421	3422	679337	312	15.4227	1.63086	14.1059	ubc92KR_IP_1_peak_386a	Promoter (<=1kb)	10	677441	678706	1266	2	853601	NM_001181794	-147	TTI2	Tti2p	protein_coding	NP_012670.3	YJR136C
chrX	650639	652986	2348	2349	651470	2023	1281.23	10.5459	1278.62	ubc92KR_IP_1_peak_384a	Promoter (<=1kb)	10	651901	652578	678	1	853587	NM_001181781	0	RPS5	ribosomal 40S subunit protein S5	protein_coding	NP_012657.1	YJR123W
chrX	622522	622940	419	420	622657	272	7.85914	1.42244	6.62129	ubc92KR_IP_1_peak_383	Promoter (<=1kb)	10	622550	623014	465	2	853568	NM_001181762	74	SOD1	superoxide dismutase SOD1	protein_coding	NP_012638.1	YJR104C
chrX	620370	620919	550	551	620626	320	17.2057	1.67254	15.8737	ubc92KR_IP_1_peak_382	Promoter (<=1kb)	10	620754	622490	1737	1	853567	NM_001181761	0	URA8	CTP synthase URA8	protein_coding	NP_012637.4	YJR103W
chrX	607450	609091	1642	1643	608044	629	137.598	3.28256	135.864	ubc92KR_IP_1_peak_380a	Promoter (<=1kb)	10	608305	608858	554	1	853557	NM_001181752	0	RPL43B	ribosomal 60S subunit protein L43B	protein_coding	NP_012628.3	YJR094W-A
chrX	572238	572858	621	622	572452	303	13.5212	1.58397	12.2213	ubc92KR_IP_1_peak_379	Promoter (<=1kb)	10	572315	572935	621	2	853536	NM_001181731	77	OPI3	bifunctional phosphatidyl-N-methylethanolamine N-methyltransferase/phosphatidyl-N-dimethylethanolamine N-methyltransferase	protein_coding	NP_012607.1	YJR073C
chrX	572258	572590	333	334	572406	139	5.81397	1.5129	4.53831	ubc92KR_IP_2_peak_373	Promoter (<=1kb)	10	570967	572124	1158	2	853535	NM_001181730	-134	NPA3	GTPase NPA3	protein_coding	NP_012606.3	YJR072C
chrX	517345	518528	1184	1185	517872	1193	516.83	6.22124	514.688	ubc92KR_IP_1_peak_374	Promoter (<=1kb)	10	516461	517513	1053	2	853500	NM_001181701	0	POL32	DNA polymerase delta subunit POL32	protein_coding	NP_012577.1	YJR043C
chrX	464821	465778	958	959	464917	239	3.45957	1.2505	2.29817	ubc92KR_IP_1_peak_373a	Promoter (<=1kb)	10	464451	466208	1758	2	853473	NM_001181674	430	ILV3	dihydroxy-acid dehydratase ILV3	protein_coding	NP_012550.1	YJR016C
chrX	456812	457425	614	615	456943	248	4.48382	1.29739	3.29942	ubc92KR_IP_1_peak_372a	Promoter (<=1kb)	10	456239	457774	1536	1	853466	NM_001181668	573	MET3	sulfate adenylyltransferase	protein_coding	NP_012543.3	YJR010W
chrX	453160	455170	2011	2012	453657	454	58.4104	2.37074	56.8721	ubc92KR_IP_1_peak_371a	Promoter (<=1kb)	10	453683	454681	999	2	853465	NM_001181666	0	TDH2	glyceraldehyde-3-phosphate dehydrogenase (phosphorylating) TDH2	protein_coding	NP_012542.1	YJR009C
chrX	440693	441230	538	539	440825	250	4.72976	1.30781	3.54072	ubc92KR_IP_1_peak_370	Promoter (1-2kb)	10	440994	442553	1560	2	853459	NM_001181660	1323	MRX12	Mrx12p	protein_coding	NP_012536.2	YJR003C
chrX	435963	436609	647	648	436274	460	60.6974	2.402	59.1514	ubc92KR_IP_1_peak_369	Promoter (<=1kb)	10	436802	438610	1809	1	853457	NM_001181658	-193	AVT1	Avt1p	protein_coding	NP_012534.1	YJR001W
chrX	423969	424925	957	958	424537	840	486.373	9.08821	483.981	ubc92KR_IP_2_peak_364	Promoter (<=1kb)	10	423138	424109	972	2	853450	NM_001181440	0	CTK2	Ctk2p	protein_coding	NP_012528.1	YJL006C
chrX	414434	416473	2040	2041	414982	1180	467.708	5.62057	465.607	ubc92KR_IP_1_peak_367a	Promoter (<=1kb)	10	414285	414770	486	2	853442	NM_001181445	0	RPC17	DNA-directed RNA polymerase III subunit RPC17	protein_coding	NP_012523.2	YJL011C
chrX	396157	397324	1168	1169	396800	1453	735.373	7.57595	733.06	ubc92KR_IP_1_peak_366	Promoter (<=1kb)	10	395931	396592	662	2	853429	NM_001181458	0	APS3	Aps3p	protein_coding	NP_012510.3	YJL024C
chrX	390526	392111	1586	1587	391115	1172	500.186	6.11182	498.057	ubc92KR_IP_1_peak_365a	Promoter (<=1kb)	10	388385	390853	2469	2	853423	NM_001181463	0	VPS53	Vps53p	protein_coding	NP_012505.1	YJL029C
chrX	339036	339639	604	605	339486	298	12.5136	1.55791	11.2233	ubc92KR_IP_1_peak_359	Promoter (<=1kb)	10	339787	342255	2469	1	853396	NM_001181484	-148	IRC8	Irc8p	protein_coding	NP_012484.1	YJL051W
chrX	338226	338660	435	436	338329	254	5.2411	1.32866	4.04293	ubc92KR_IP_1_peak_358	Promoter (<=1kb)	10	338271	339269	999	1	853395	NM_001181485	0	TDH1	glyceraldehyde-3-phosphate dehydrogenase (phosphorylating) TDH1	protein_coding	NP_012483.3	YJL052W
chrX	323460	324732	1273	1274	323730	162	10.9647	1.76145	9.59905	ubc92KR_IP_2_peak_353a	Promoter (<=1kb)	10	323386	324720	1335	1	853386	NM_001181493	74	BNA3	kynurenine--oxoglutarate transaminase	protein_coding	NP_012475.3	YJL060W
chrX	235578	235986	409	410	235704	118	2.47457	1.28597	1.30162	ubc92KR_IP_2_peak_352a	Promoter (<=1kb)	10	234320	236356	2037	2	853344	NM_001181534	370	GSH1	glutamate--cysteine ligase	protein_coding	NP_012434.1	YJL101C
chrX	172227	173415	1189	1190	172350	263	6.48613	1.37555	5.26744	ubc92KR_IP_1_peak_353a	Promoter (<=1kb)	10	165723	172367	6645	2	853311	NM_001181563	0	URA2	bifunctional carbamoylphosphate synthetase/aspartate transcarbamylase	protein_coding	NP_012405.2	YJL130C
chrX	169226	170278	1053	1054	169325	235	3.04809	1.22966	1.89752	ubc92KR_IP_1_peak_352a	Promoter (2-3kb)	10	165723	172367	6645	2	853311	NM_001181563	2089	URA2	bifunctional carbamoylphosphate synthetase/aspartate transcarbamylase	protein_coding	NP_012405.2	YJL130C
chrX	165608	166279	672	673	165863	238	3.3542	1.24529	2.19549	ubc92KR_IP_1_peak_350	Promoter (<=1kb)	10	164278	165348	1071	2	853310	NM_001181564	-260	AIM23	Aim23p	protein_coding	NP_012404.1	YJL131C
chrX	166965	168287	1323	1324	167301	242	3.78593	1.26613	2.61663	ubc92KR_IP_1_peak_351a	Promoter (1-2kb)	10	164278	165348	1071	2	853310	NM_001181564	-1617	AIM23	Aim23p	protein_coding	NP_012404.1	YJL131C
chrX	156311	158620	2310	2311	157604	3093	2484.02	16.121	2480.91	ubc92KR_IP_1_peak_349	Promoter (<=1kb)	10	156550	157273	724	2	853305	NM_001181569	0	RPS21B	ribosomal 40S subunit protein S21B	protein_coding	NP_012399.1	YJL136C
chrX	139238	140517	1280	1281	140063	755	208.136	3.93907	206.305	ubc92KR_IP_1_peak_348	Promoter (<=1kb)	10	140437	141138	702	1	853293	NM_001181581	0	RPA34	DNA-directed RNA polymerase I subunit RPA34	protein_coding	NP_012387.1	YJL148W
chrX	136099	136538	440	441	136339	271	7.7004	1.41723	6.46458	ubc92KR_IP_1_peak_347	Promoter (<=1kb)	10	134332	135933	1602	2	853288	NM_001181586	-166	INO1	inositol-3-phosphate synthase INO1	protein_coding	NP_012382.2	YJL153C
chrX	120072	122657	2586	2587	120366	382	33.7715	1.99559	32.3345	ubc92KR_IP_1_peak_346a	Promoter (<=1kb)	10	120449	121690	1242	1	853281	NM_001181592	0	HSP150	heat shock protein HSP150	protein_coding	NP_012376.3	YJL159W
chrX	115212	116840	1629	1630	116016	2873	2221.36	14.9747	2218.35	ubc92KR_IP_1_peak_345	Promoter (<=1kb)	10	113878	115629	1752	2	853277	NM_001181595	0	JJJ2	Jjj2p	protein_coding	NP_012373.2	YJL162C
chrX	89411	91894	2484	2485	90261	2691	2009.57	14.0264	2006.65	ubc92KR_IP_1_peak_344	Promoter (<=1kb)	10	89282	90097	816	2	853261	NM_001181611	0	ATG27	Atg27p	protein_coding	NP_012357.2	YJL178C
chrX	72901	76748	3848	3849	73605	1897	1145.78	9.78399	1143.23	ubc92KR_IP_1_peak_343a	Promoter (<=1kb)	10	72710	73414	705	2	853247	NM_001181625	0	SOP4	Sop4p	protein_coding	NP_012343.1	YJL192C
chrX	58616	59626	1011	1012	59197	1129	466.619	5.88777	464.519	ubc92KR_IP_1_peak_342	Promoter (<=1kb)	10	56444	58813	2370	2	853230	NM_001181633	0	ACO2	aconitate hydratase ACO2	protein_coding	NP_012335.1	YJL200C
chrX	33882	36342	2461	2462	34052	147	7.43808	1.59935	6.12888	ubc92KR_IP_2_peak_338a	Promoter (<=1kb)	10	33850	36249	2400	2	853218	NM_001181645	0	OPT1	oligopeptide transporter OPT1	protein_coding	NP_012323.1	YJL212C
chrIX	420415	421395	981	982	420882	468	63.7991	2.44369	62.2424	ubc92KR_IP_1_peak_165	Promoter (<=1kb)	9	419615	420736	1122	2	854852	NM_001179556	0	LYS1	saccharopine dehydrogenase (NAD+, L-lysine-forming)	protein_coding	NP_012300.3	YIR034C
chrIX	382205	382545	341	342	382308	230	2.5718	1.20361	1.43514	ubc92KR_IP_1_peak_164	Promoter (<=1kb)	9	382628	383425	798	1	854833	NM_001179538	-83	.	uncharacterized protein	protein_coding	NP_012281.1	YIR016W
chrIX	369863	370968	1106	1107	370426	1538	811.393	8.01883	809.031	ubc92KR_IP_1_peak_163	Promoter (<=1kb)	9	365466	369908	4443	2	854822	NM_001179528	0	PAN1	Pan1p	protein_coding	NP_012271.3	YIR006C
chrIX	355431	356012	582	583	355756	302	13.3168	1.57876	12.0188	ubc92KR_IP_1_peak_162	Promoter (<=1kb)	9	356143	356895	753	2	854817	NM_001179523	883	SGN1	Sgn1p	protein_coding	NP_012266.1	YIR001C
chrIX	335906	336852	947	948	336407	1129	466.619	5.88777	464.519	ubc92KR_IP_1_peak_161	Promoter (<=1kb)	9	335666	336212	547	2	854806	NM_001184306	0	EST3	telomerase subunit EST3	protein_coding	NP_012256.1	YIL009C-A
chrIX	315362	318175	2814	2815	316392	5624	5906.88	29.3086	5902.86	ubc92KR_IP_1_peak_159a	Promoter (<=1kb)	9	316768	317932	1165	1	854794	NM_001179368	0	RPL2B	ribosomal 60S subunit protein L2B	protein_coding	NP_012246.1	YIL018W
chrIX	299802	300737	936	937	300275	1074	424.722	5.6012	422.662	ubc92KR_IP_1_peak_158	Promoter (<=1kb)	9	296050	300009	3960	2	854781	NM_001179380	0	SSM4	E3 ubiquitin-protein ligase SSM4	protein_coding	NP_012234.3	YIL030C
chrIX	257088	258360	1273	1274	257349	613	129.38	3.1992	127.66	ubc92KR_IP_1_peak_157a	Promoter (<=1kb)	9	257843	258280	438	2	854760	NM_001179401	0	MMF1	isoleucine biosynthesis protein MMF1	protein_coding	NP_012213.3	YIL051C
chrIX	254904	256538	1635	1636	255282	377	32.2656	1.96954	30.8372	ubc92KR_IP_1_peak_156a	Promoter (<=1kb)	9	255115	255867	753	1	854758	NM_001179403	0	GPP1	glycerol-1-phosphatase RHR2	protein_coding	NP_012211.2	YIL053W
chrIX	247664	249488	1825	1826	248855	2615	1922.69	13.6304	1919.81	ubc92KR_IP_1_peak_155	Promoter (<=1kb)	9	247902	248396	495	2	854753	NM_001179407	0	RGI2	Rgi2p	protein_coding	NP_012207.3	YIL057C
chrIX	231312	233590	2279	2280	231542	307	14.3525	1.60481	13.0452	ubc92KR_IP_1_peak_154a	Promoter (<=1kb)	9	231553	232369	817	2	854741	NM_001179419	0	RPS24B	ribosomal 40S subunit protein S24B	protein_coding	NP_012195.1	YIL069C
chrIX	220726	222713	1988	1989	220996	191	19.3998	2.07484	17.9411	ubc92KR_IP_2_peak_148a	Promoter (<=1kb)	9	221081	222490	1410	2	854736	NM_001179424	0	SER33	phosphoglycerate dehydrogenase SER33	protein_coding	NP_012191.1	YIL074C
chrIX	187365	188170	806	807	187876	445	55.0443	2.32385	53.5181	ubc92KR_IP_1_peak_151	Promoter (<=1kb)	9	186517	187632	1116	2	854714	NM_001179442	0	LYS12	homoisocitrate dehydrogenase	protein_coding	NP_012172.1	YIL094C
chrIX	183031	183953	923	924	183528	1008	376.063	5.25731	374.051	ubc92KR_IP_1_peak_150	Promoter (<=1kb)	9	182117	183127	1011	2	854711	NM_001179444	0	BMT5	25S rRNA (uracil2634-N3)-methyltransferase	protein_coding	NP_012170.1	YIL096C
chrIX	174582	175459	878	879	175028	1085	433.006	5.65851	430.937	ubc92KR_IP_1_peak_149	Promoter (<=1kb)	9	174582	174887	306	2	854704	NM_001179450	0	.	uncharacterized protein	protein_coding	NP_012164.1	YIL102C
chrIX	138125	138638	514	515	138409	342	22.5423	1.78717	21.1733	ubc92KR_IP_1_peak_148	Promoter (<=1kb)	9	136654	137877	1224	2	854687	NM_001179467	-248	RPI1	Rpi1p	protein_coding	NP_012147.3	YIL119C
chrIX	98299	100682	2384	2385	99799	2447	1734.09	12.7551	1731.29	ubc92KR_IP_1_peak_147	Promoter (<=1kb)	9	98527	99416	890	2	854673	NM_001179481	0	RPL16A	ribosomal 60S subunit protein L16A	protein_coding	NP_012133.1	YIL133C
chrIX	67599	69768	2170	2171	68386	2918	2274.51	15.2092	2271.48	ubc92KR_IP_1_peak_145	Promoter (<=1kb)	9	63028	68067	5040	2	854657	NM_001179497	0	MLP2	Mlp2p	protein_coding	NP_012117.3	YIL149C
chrIX	24132	25211	1080	1081	24397	234	2.94939	1.22445	1.80154	ubc92KR_IP_1_peak_143a	Promoter (<=1kb)	9	23119	26106	2988	2	854637	NM_001179517	895	CSS1	Css1p	protein_coding	NP_012097.1	YIL169C
chrIX	25889	28375	2487	2488	26277	290	10.9755	1.51623	9.70134	ubc92KR_IP_1_peak_144a	Promoter (<=1kb)	9	23119	26106	2988	2	854637	NM_001179517	0	CSS1	Css1p	protein_coding	NP_012097.1	YIL169C
chrVIII	556267	557043	777	778	556331	230	2.5718	1.20361	1.43514	ubc92KR_IP_1_peak_341a	Promoter (<=1kb)	8	558014	559924	1911	1	856628	NM_001179349	-971	.	uncharacterized protein	protein_coding	NP_012090.1	YHR218W
chrVIII	553791	554661	871	872	554203	477	67.3589	2.49058	65.7904	ubc92KR_IP_1_peak_340	Promoter (<=1kb)	8	554396	555967	1572	1	856626	NM_001179347	0	IMD2	IMP dehydrogenase IMD2	protein_coding	NP_012088.3	YHR216W
chrVIII	504235	504559	325	326	504419	289	10.7898	1.51102	9.51757	ubc92KR_IP_1_peak_338	Promoter (<=1kb)	8	504476	505530	1055	2	856610	NM_001179334	971	RPS4B	ribosomal 40S subunit protein S4B	protein_coding	NP_012073.1	YHR203C
chrVIII	505001	506722	1722	1723	505993	2429	1714.18	12.6613	1711.38	ubc92KR_IP_1_peak_339	Promoter (<=1kb)	8	504476	505530	1055	2	856610	NM_001179334	0	RPS4B	ribosomal 40S subunit protein S4B	protein_coding	NP_012073.1	YHR203C
chrVIII	475122	476455	1334	1335	475760	1401	689.923	7.305	687.642	ubc92KR_IP_1_peak_337	Promoter (<=1kb)	8	474627	475340	714	2	856591	NM_001179316	0	PFS1	Pfs1p	protein_coding	NP_012055.3	YHR185C
chrVIII	455257	455567	311	312	455354	128	3.89197	1.39403	2.66793	ubc92KR_IP_2_peak_332	Promoter (1-2kb)	8	456591	457952	1362	1	856582	NM_001179308	-1024	ROF1	Rof1p	protein_coding	NP_012047.1	YHR177W
chrVIII	454539	454868	330	331	454670	125	3.43295	1.36161	2.22372	ubc92KR_IP_2_peak_331	Promoter (<=1kb)	8	454229	455527	1299	1	856581	NM_001179307	310	FMO1	N,N-dimethylaniline monooxygenase	protein_coding	NP_012046.4	YHR176W
chrVIII	422626	423633	1008	1009	422994	283	9.70612	1.47976	8.44613	ubc92KR_IP_1_peak_334a	Promoter (<=1kb)	8	423072	423461	390	1	856567	NM_001179293	0	MPC2	mitochondrial pyruvate carrier	protein_coding	NP_012032.1	YHR162W
chrVIII	388524	389337	814	815	388983	1397	686.461	7.28416	684.182	ubc92KR_IP_1_peak_332	Promoter (<=1kb)	8	387788	388726	939	2	856548	NM_001179275	0	DCD1	deoxycytidine monophosphate deaminase	protein_coding	NP_012014.1	YHR144C
chrVIII	381368	384240	2873	2874	381812	394	37.4998	2.05811	36.0441	ubc92KR_IP_1_peak_331a	Promoter (<=1kb)	8	381990	382751	762	2	856544	NM_001179271	0	RPL42B	ribosomal 60S subunit protein L42B	protein_coding	NP_012010.1	YHR141C
chrVIII	375536	376999	1464	1465	375765	281	9.3567	1.46934	8.10075	ubc92KR_IP_1_peak_330a	Promoter (<=1kb)	8	375709	377250	1542	1	856539	NM_001179267	0	ARO9	aromatic-amino-acid:2-oxoglutarate transaminase	protein_coding	NP_012005.1	YHR137W
chrVIII	226975	228016	1042	1043	227375	523	86.6692	2.73026	85.0444	ubc92KR_IP_1_peak_327	Promoter (<=1kb)	8	225525	227141	1617	2	856461	NM_001179194	0	SSZ1	Ssz1p	protein_coding	NP_011931.2	YHR064C
chrVIII	147648	149427	1780	1781	147965	401	39.7474	2.09459	38.2813	ubc92KR_IP_1_peak_326a	Promoter (<=1kb)	8	147871	148669	799	2	856415	NM_001179151	0	RPS27B	ribosomal 40S subunit protein S27B	protein_coding	NP_011885.1	YHR021C
chrVIII	139901	141494	1594	1595	140091	286	10.2413	1.49539	8.97508	ubc92KR_IP_1_peak_324a	Promoter (<=1kb)	8	140011	141402	1392	2	856411	NM_001179148	0	ARG4	argininosuccinate lyase ARG4	protein_coding	NP_011882.1	YHR018C
chrVIII	125416	127731	2316	2317	126134	2288	1560.2	11.9266	1557.47	ubc92KR_IP_1_peak_322a	Promoter (<=1kb)	8	124109	125680	1572	2	856400	NM_001179139	0	TDA3	Tda3p	protein_coding	NP_011873.1	YHR009C
chrVIII	120513	121912	1400	1401	120768	269	7.38741	1.40681	6.15582	ubc92KR_IP_1_peak_321a	Promoter (<=1kb)	8	120091	121683	1593	2	856398	NM_001179137	0	ERG11	sterol 14-demethylase	protein_coding	NP_011871.1	YHR007C
chrVIII	115353	116758	1406	1407	116175	1189	513.648	6.2004	511.508	ubc92KR_IP_1_peak_320	Promoter (<=1kb)	8	115620	115901	282	2	856395	NM_001181427	0	TIM10	protein transporter TIM10	protein_coding	NP_011869.1	YHR005C-A
chrVIII	103444	105925	2482	2483	104082	1335	633.446	6.96112	631.209	ubc92KR_IP_1_peak_319a	Promoter (<=1kb)	8	104277	105091	815	1	856388	NM_001179081	0	RPL14B	ribosomal 60S subunit protein L14B	protein_coding	NP_011862.1	YHL001W
chrVIII	74968	75903	936	937	75246	1232	548.163	6.42444	545.995	ubc92KR_IP_1_peak_318	Promoter (<=1kb)	8	75412	75777	366	1	856371	NM_001179095	0	RPS20	ribosomal 40S subunit protein S20	protein_coding	NP_011848.1	YHL015W
chrVIII	62340	63213	874	875	62756	1106	448.954	5.76793	446.87	ubc92KR_IP_1_peak_317	Promoter (<=1kb)	8	59123	62563	3441	2	856362	NM_001179103	0	NPR3	Npr3p	protein_coding	NP_011840.1	YHL023C
chrVIII	55879	56338	460	461	56089	333	20.2838	1.74028	18.9295	ubc92KR_IP_1_peak_316	Promoter (<=1kb)	8	56649	58790	2142	1	856361	NM_001179104	-311	RIM4	Rim4p	protein_coding	NP_011839.1	YHL024W
chrVIII	47888	48483	596	597	48209	400	39.4231	2.08938	37.9585	ubc92KR_IP_1_peak_315	Promoter (<=1kb)	8	45929	47968	2040	2	856356	NM_001179109	0	OCA5	Oca5p	protein_coding	NP_011834.1	YHL029C
chrVIII	34776	36781	2006	2007	35534	664	156.181	3.46493	154.418	ubc92KR_IP_1_peak_314a	Promoter (<=1kb)	8	35255	36025	771	2	856352	NM_001179113	0	RPL8A	ribosomal 60S subunit protein L8A	protein_coding	NP_011830.1	YHL033C
chrVII	1083612	1083930	319	320	1083746	271	7.7004	1.41723	6.46458	ubc92KR_IP_1_peak_313	Promoter (<=1kb)	7	1081584	1082729	1146	2	853212	NM_001181424	-883	COS6	Cos6p	protein_coding	NP_011811.1	YGR295C
chrVII	1064464	1064851	388	389	1064745	245	4.12739	1.28176	2.95034	ubc92KR_IP_1_peak_312	Promoter (<=1kb)	7	1063813	1064940	1128	2	853203	NM_001181415	89	BIO2	biotin synthase	protein_coding	NP_011802.1	YGR286C
chrVII	1003790	1004543	754	755	1004208	930	320.986	4.8509	319.029	ubc92KR_IP_1_peak_311	Promoter (<=1kb)	7	1002523	1003962	1440	2	853170	NM_001181384	0	COQ6	putative N,N-dimethylaniline monooxygenase COQ6	protein_coding	NP_011771.1	YGR255C
chrVII	1000552	1002593	2042	2043	1000957	505	78.8961	2.63647	77.2932	ubc92KR_IP_1_peak_310a	Promoter (<=1kb)	7	1000927	1002240	1314	1	853169	NM_001181383	0	ENO1	phosphopyruvate hydratase ENO1	protein_coding	NP_011770.3	YGR254W
chrVII	972962	973244	283	284	973218	130	4.21374	1.41564	2.98018	ubc92KR_IP_2_peak_304	Promoter (<=1kb)	7	970771	973734	2964	2	853155	NM_001181369	490	PFK1	6-phosphofructokinase subunit alpha	protein_coding	NP_011756.1	YGR240C
chrVII	959856	961509	1654	1655	960137	319	16.9781	1.66733	15.648	ubc92KR_IP_1_peak_309a	Promoter (<=1kb)	7	959904	961103	1200	1	853149	NM_001181363	0	YHB1	flavohemoglobin	protein_coding	NP_011750.1	YGR234W
chrVII	939160	939935	776	777	939590	417	45.0809	2.17795	43.5921	ubc92KR_IP_1_peak_308	Promoter (<=1kb)	7	939923	940804	882	1	853137	NM_001181351	0	PET54	Pet54p	protein_coding	NP_011738.3	YGR222W
chrVII	919558	921202	1645	1646	920125	911	556.049	9.85547	553.601	ubc92KR_IP_2_peak_300	Promoter (<=1kb)	7	920575	921788	1214	1	853128	NM_001181343	0	RPS0A	ribosomal 40S subunit protein S0A	protein_coding	NP_011730.1	YGR214W
chrVII	919440	921696	2257	2258	920127	1723	983.75	8.98276	981.292	ubc92KR_IP_1_peak_306a	Promoter (<=1kb)	7	918512	919465	954	2	853127	NM_001181342	0	RTA1	Rta1p	protein_coding	NP_011729.1	YGR213C
chrVII	905360	906255	896	897	905671	319	16.9781	1.66733	15.648	ubc92KR_IP_1_peak_305	Promoter (<=1kb)	7	905934	908774	2841	1	853118	NM_001181333	0	ADE3	trifunctional formate-tetrahydrofolate ligase/methenyltetrahydrofolate cyclohydrolase/methylenetetrahydrofolate dehydrogenase ADE3	protein_coding	NP_011720.3	YGR204W
chrVII	882219	884254	2036	2037	882784	631	138.637	3.29298	136.901	ubc92KR_IP_1_peak_304a	Promoter (<=1kb)	7	882812	883810	999	2	853106	NM_001181321	0	TDH3	glyceraldehyde-3-phosphate dehydrogenase (phosphorylating) TDH3	protein_coding	NP_011708.3	YGR192C
chrVII	877782	879385	1604	1605	878093	243	3.89809	1.27134	2.72621	ubc92KR_IP_1_peak_303a	Promoter (<=1kb)	7	876669	878192	1524	2	853102	NM_001181318	0	CRH1	transglycosylase	protein_coding	NP_011705.1	YGR189C
chrVII	806689	807241	553	554	807109	274	8.18137	1.43286	6.93943	ubc92KR_IP_1_peak_298	Promoter (<=1kb)	7	806412	807656	1245	2	853064	NM_001181288	415	NSR1	Nsr1p	protein_coding	NP_011675.1	YGR159C
chrVII	803858	804906	1049	1050	803995	238	3.3542	1.24529	2.19549	ubc92KR_IP_1_peak_297a	Promoter (1-2kb)	7	805269	806021	753	2	853062	NM_001181287	1115	MTR3	exosome non-catalytic core subunit MTR3	protein_coding	NP_011674.3	YGR158C
chrVII	801357	801831	475	476	801599	311	15.2059	1.62565	13.8911	ubc92KR_IP_1_peak_295	Promoter (<=1kb)	7	802440	805049	2610	1	853061	NM_001181286	-609	CHO2	phosphatidylethanolamine N-methyltransferase	protein_coding	NP_011673.1	YGR157W
chrVII	802620	803102	483	484	802944	236	3.1484	1.23487	1.99503	ubc92KR_IP_1_peak_296	Promoter (<=1kb)	7	802440	805049	2610	1	853061	NM_001181286	180	CHO2	phosphatidylethanolamine N-methyltransferase	protein_coding	NP_011673.1	YGR157W
chrVII	798439	800384	1946	1947	798905	300	12.9124	1.56834	11.6182	ubc92KR_IP_1_peak_294a	Promoter (<=1kb)	7	798543	800066	1524	1	853059	NM_001181284	0	CYS4	cystathionine beta-synthase CYS4	protein_coding	NP_011671.3	YGR155W
chrVII	786881	789381	2501	2502	787165	493	73.8673	2.57395	72.279	ubc92KR_IP_1_peak_292a	Promoter (<=1kb)	7	786054	786920	867	2	853050	NM_001181276	0	NAT2	Nat2p	protein_coding	NP_011663.3	YGR147C
chrVII	727528	727972	445	446	727700	144	6.80738	1.56693	5.51039	ubc92KR_IP_2_peak_283	Promoter (<=1kb)	7	726974	727730	757	1	853015	NM_001181247	554	RPS23A	ribosomal 40S subunit protein S23A	protein_coding	NP_011633.3	YGR118W
chrVII	725877	728138	2262	2263	726392	627	136.561	3.27214	134.829	ubc92KR_IP_1_peak_287a	Promoter (<=1kb)	7	725049	726479	1431	2	853014	NM_001181246	0	.	uncharacterized protein	protein_coding	NP_011632.3	YGR117C
chrVII	647997	650145	2149	2150	648362	397	38.4566	2.07375	36.9964	ubc92KR_IP_1_peak_284a	Promoter (<=1kb)	7	647123	648142	1020	2	852975	NM_001181213	0	MRP13	mitochondrial 37S ribosomal protein YmS-A	protein_coding	NP_011598.3	YGR084C
chrVII	617905	620490	2586	2587	618034	238	3.3542	1.24529	2.19549	ubc92KR_IP_1_peak_283a	Promoter (<=1kb)	7	618077	619858	1782	2	852956	NM_001181194	0	VHT1	Vht1p	protein_coding	NP_011579.1	YGR065C
chrVII	599140	601466	2327	2328	599506	378	32.5645	1.97475	31.1344	ubc92KR_IP_1_peak_281a	Promoter (<=1kb)	7	599417	601141	1725	1	852946	NM_001181184	0	MUP1	Mup1p	protein_coding	NP_011569.1	YGR055W
chrVII	554820	556973	2154	2155	555488	1109	451.246	5.78356	449.161	ubc92KR_IP_1_peak_279a	Promoter (<=1kb)	7	554248	554967	720	2	852921	NM_001181162	0	TIM21	Tim21p	protein_coding	NP_011547.3	YGR033C
chrVII	534056	535829	1774	1775	534991	1903	1159.74	9.92063	1157.19	ubc92KR_IP_1_peak_276a	Promoter (<=1kb)	7	534132	534458	327	2	852911	NM_001181156	0	RPS25A	ribosomal 40S subunit protein S25A	protein_coding	NP_011541.1	YGR027C
chrVII	496629	497312	684	685	496922	395	35.1724	2.00268	33.7288	ubc92KR_IP_1_peak_274	Promoter (<=1kb)	7	495453	496502	1050	2	852883	NM_001180866	-127	ERG26	sterol-4-alpha-carboxylate 3-dehydrogenase (decarboxylating)	protein_coding	NP_011514.1	YGL001C
chrVII	472315	472857	543	544	472603	372	30.7881	1.94349	29.368	ubc92KR_IP_1_peak_272	Promoter (<=1kb)	7	472855	474276	1422	1	852872	NM_001180877	0	ERG4	delta(24(24(1)))-sterol reductase	protein_coding	NP_011503.1	YGL012W
chrVII	436925	441634	4710	4711	437413	321	17.4346	1.67775	16.1007	ubc92KR_IP_1_peak_271a	Promoter (<=1kb)	7	437467	437934	468	2	852852	NM_001180896	0	RPL24A	ribosomal 60S subunit protein L24A	protein_coding	NP_011484.1	YGL031C
chrVII	400979	402080	1102	1103	401585	848	494.098	9.17466	491.699	ubc92KR_IP_2_peak_262	Promoter (<=1kb)	7	400871	401287	417	2	852826	NM_001180919	0	ERV14	cornichon family protein	protein_coding	NP_011461.1	YGL054C
chrVII	398045	402211	4167	4168	398688	496	75.1127	2.58958	73.5209	ubc92KR_IP_1_peak_267a	Promoter (<=1kb)	7	398628	400160	1533	1	852825	NM_001180920	0	OLE1	stearoyl-CoA 9-desaturase	protein_coding	NP_011460.3	YGL055W
chrVII	364927	366879	1953	1954	365412	368	29.6268	1.92264	28.2131	ubc92KR_IP_1_peak_266a	Promoter (<=1kb)	7	364335	365996	1662	2	852804	NM_001180941	0	RPL7A	ribosomal 60S subunit protein L7A	protein_coding	NP_011439.1	YGL076C
chrVII	363078	364452	1375	1376	363171	240	3.56671	1.25571	2.40263	ubc92KR_IP_1_peak_265a	Promoter (<=1kb)	7	362225	363916	1692	2	852803	NM_001180942	0	HNM1	Hnm1p	protein_coding	NP_011438.1	YGL077C
chrVII	362128	362587	460	461	362270	258	5.77844	1.3495	4.57101	ubc92KR_IP_1_peak_264a	Promoter (<=1kb)	7	360288	361859	1572	2	852802	NM_001180943	-269	DBP3	RNA-dependent ATPase DBP3	protein_coding	NP_011437.3	YGL078C
chrVII	309937	312349	2413	2414	310738	2438	1724.13	12.7082	1721.33	ubc92KR_IP_1_peak_260a	Promoter (<=1kb)	7	308713	310173	1461	2	852774	NM_001180969	0	VPS73	putative sugar transporter	protein_coding	NP_011411.3	YGL104C
chrVII	276488	278711	2224	2225	277213	2018	1276.1	10.5198	1273.49	ubc92KR_IP_1_peak_258a	Promoter (<=1kb)	7	274780	276714	1935	2	852753	NM_001180989	0	MON1	Mon1p	protein_coding	NP_011391.2	YGL124C
chrVII	272873	273309	437	438	272954	229	2.48173	1.1984	1.34796	ubc92KR_IP_1_peak_257	Promoter (<=1kb)	7	272520	274322	1803	1	852752	NM_001180990	353	MET13	methylenetetrahydrofolate reductase (NAD(P)H) MET13	protein_coding	NP_011390.2	YGL125W
chrVII	270970	274889	3920	3921	271239	139	5.81397	1.5129	4.53831	ubc92KR_IP_2_peak_253a	Promoter (<=1kb)	7	270997	272139	1143	1	852751	NM_001180991	0	SCS3	Scs3p	protein_coding	NP_011389.3	YGL126W
chrVII	255155	255684	530	531	255325	443	54.3068	2.31343	52.7833	ubc92KR_IP_1_peak_256	Promoter (<=1kb)	7	255663	256964	1302	1	852743	NM_001180999	0	PCL10	Pcl10p	protein_coding	NP_011381.1	YGL134W
chrVII	253216	254862	1647	1648	254344	4138	3817.42	21.5659	3813.94	ubc92KR_IP_1_peak_255	Promoter (<=1kb)	7	252897	253859	963	2	852741	NM_001181001	0	MRM2	21S rRNA (uridine2791-2'-O) methyltransferase	protein_coding	NP_011379.1	YGL136C
chrVII	227404	229429	2026	2027	228634	989	362.398	5.15831	360.399	ubc92KR_IP_1_peak_254	Promoter (<=1kb)	7	227754	228329	576	2	852730	NM_001181012	0	RPL9A	ribosomal 60S subunit protein L9A	protein_coding	NP_011368.3	YGL147C
chrVII	185272	186299	1028	1029	185761	1227	544.116	6.39839	541.951	ubc92KR_IP_1_peak_252	Promoter (<=1kb)	7	184153	185394	1242	2	852705	NM_001181035	0	SPO74	Spo74p	protein_coding	NP_011345.3	YGL170C
chrVII	73241	74586	1346	1347	73906	1595	863.52	8.31582	861.126	ubc92KR_IP_1_peak_247	Promoter (<=1kb)	7	73340	73711	372	1	852626	NM_001181092	0	MTC3	Mtc3p	protein_coding	NP_011289.1	YGL226W
chrVII	23912	24193	282	283	24026	235	3.04809	1.22966	1.89752	ubc92KR_IP_1_peak_245	Promoter (<=1kb)	7	23935	25395	1461	1	852639	NM_001181119	0	HXK2	hexokinase 2	protein_coding	NP_011261.1	YGL253W
chrVII	24607	25533	927	928	24944	237	3.25046	1.24008	2.09445	ubc92KR_IP_1_peak_246a	Promoter (<=1kb)	7	23935	25395	1461	1	852639	NM_001181119	672	HXK2	hexokinase 2	protein_coding	NP_011261.1	YGL253W
chrVII	20714	22381	1668	1669	21199	370	30.2051	1.93306	28.7882	ubc92KR_IP_1_peak_244a	Promoter (<=1kb)	7	20978	22108	1131	1	852637	NM_001181121	0	ZRT1	high-affinity Zn(2+) transporter ZRT1	protein_coding	NP_011259.1	YGL255W
chrV	546074	546492	419	420	546247	255	5.37303	1.33387	4.17251	ubc92KR_IP_1_peak_226	Promoter (<=1kb)	5	546817	548079	1263	1	856925	NM_001179068	-325	PDA1	pyruvate dehydrogenase (acetyl-transferring) subunit E1 alpha	protein_coding	NP_011105.4	YER178W
chrV	545630	546539	910	911	545768	127	3.73579	1.38322	2.51669	ubc92KR_IP_2_peak_222a	Promoter (<=1kb)	5	545611	546414	804	1	856924	NM_001179067	19	BMH1	14-3-3 family protein BMH1	protein_coding	NP_011104.3	YER177W
chrV	491698	492855	1158	1159	492430	2129	1391.11	11.0982	1388.46	ubc92KR_IP_1_peak_225	Promoter (<=1kb)	5	491530	491958	429	2	856904	NM_001179049	0	BUR6	negative cofactor 2 transcription regulator complex subunit BUR6	protein_coding	NP_011086.3	YER159C
chrV	441459	443654	2196	2197	442053	1494	771.78	7.78957	769.443	ubc92KR_IP_1_peak_222a	Promoter (<=1kb)	5	441373	441819	447	2	856877	NM_001179027	0	.	uncharacterized protein	protein_coding	NP_011063.3	YER137C
chrV	422490	425325	2836	2837	422848	422	46.8021	2.20401	45.3063	ubc92KR_IP_1_peak_218a	Promoter (<=1kb)	5	423952	424311	360	1	856868	NM_001179021	0	RPS26B	ribosomal 40S subunit protein S26B	protein_coding	NP_011057.1	YER131W
chrV	408940	409284	345	346	409121	292	11.3514	1.52665	10.0732	ubc92KR_IP_1_peak_217	Promoter (<=1kb)	5	407342	409063	1722	2	856861	NM_001179014	0	DSE1	Dse1p	protein_coding	NP_011050.3	YER124C
chrV	395310	397914	2605	2606	396420	4970	4963.15	25.901	4959.36	ubc92KR_IP_1_peak_216	Promoter (<=1kb)	5	395348	396172	825	2	856852	NM_001179006	0	SLX8	SUMO-targeted ubiquitin ligase complex subunit SLX8	protein_coding	NP_011041.3	YER116C
chrV	361442	363966	2525	2526	362389	3050	2432.13	15.897	2429.04	ubc92KR_IP_1_peak_215a	Promoter (<=1kb)	5	360502	361794	1293	2	856838	NM_001178992	0	AST2	Ast2p	protein_coding	NP_011027.1	YER101C
chrV	339320	343065	3746	3747	339977	531	90.2103	2.77194	88.5763	ubc92KR_IP_1_peak_213a	Promoter (<=1kb)	5	339864	342167	2304	2	856825	NM_001178982	0	MET6	5-methyltetrahydropteroyltriglutamate-homocysteine S-methyltransferase	protein_coding	NP_011015.3	YER091C
chrV	321967	323230	1264	1265	322414	296	12.1204	1.54749	10.8342	ubc92KR_IP_1_peak_212a	Promoter (<=1kb)	5	322686	324095	1410	1	856814	NM_001178972	0	SER3	phosphoglycerate dehydrogenase SER3	protein_coding	NP_011004.3	YER081W
chrV	303711	307462	3752	3753	304130	361	27.6396	1.88617	26.2377	ubc92KR_IP_1_peak_210a	Promoter (<=1kb)	5	304030	305592	1563	1	856804	NM_001178964	0	ALD5	aldehyde dehydrogenase (NAD(P)(+)) ALD5	protein_coding	NP_010996.2	YER073W
chrV	302446	303375	930	931	302520	233	2.85244	1.21924	1.70733	ubc92KR_IP_1_peak_209a	Promoter (<=1kb)	5	302806	303195	390	1	856803	NM_001178963	0	VTC1	Vtc1p	protein_coding	NP_010995.1	YER072W
chrV	297584	297942	359	360	297668	119	2.60168	1.29677	1.42357	ubc92KR_IP_2_peak_206	Promoter (1-2kb)	5	298950	301616	2667	1	856801	NM_001178961	-1008	RNR1	ribonucleotide-diphosphate reductase subunit RNR1	protein_coding	NP_010993.1	YER070W
chrV	295748	297232	1485	1486	295840	123	3.1429	1.34	1.94382	ubc92KR_IP_2_peak_205a	Promoter (<=1kb)	5	295410	298001	2592	1	856800	NM_001178960	338	ARG5%2C6	bifunctional acetylglutamate kinase/N-acetyl-gamma-glutamyl-phosphate reductase	protein_coding	NP_010992.1	YER069W
chrV	269180	271107	1928	1929	269668	333	20.2838	1.74028	18.9295	ubc92KR_IP_1_peak_207a	Promoter (<=1kb)	5	269423	270185	763	2	856784	NM_001180036	0	RPL34A	ribosomal 60S subunit protein L34A	protein_coding	NP_010977.2	YER056C-A
chrV	266320	268192	1873	1874	266686	279	9.01333	1.45892	7.76145	ubc92KR_IP_1_peak_206a	Promoter (<=1kb)	5	266512	268113	1602	2	856783	NM_001178947	0	FCY2	purine-cytosine permease	protein_coding	NP_010976.1	YER056C
chrV	265377	265870	494	495	265463	229	2.48173	1.1984	1.34796	ubc92KR_IP_1_peak_205a	Promoter (<=1kb)	5	264892	265785	894	2	856782	NM_001178946	0	HIS1	ATP phosphoribosyltransferase	protein_coding	NP_010975.3	YER055C
chrV	257239	257827	589	590	257552	156	9.48114	1.69661	8.1375	ubc92KR_IP_2_peak_200	Promoter (<=1kb)	5	256375	257958	1584	2	856778	NM_001178943	131	HOM3	aspartate kinase	protein_coding	NP_010972.1	YER052C
chrV	235402	237258	1857	1858	235646	305	13.934	1.59439	12.6305	ubc92KR_IP_1_peak_203a	Promoter (<=1kb)	5	235770	237119	1350	2	856766	NM_001178934	0	SAH1	adenosylhomocysteinase	protein_coding	NP_010961.3	YER043C
chrV	235275	236773	1499	1500	235540	160	10.4597	1.73984	9.10142	ubc92KR_IP_2_peak_198a	Promoter (<=1kb)	5	234937	235491	555	1	856765	NM_001178933	338	MXR1	peptide-methionine-S-sulfoxide reductase	protein_coding	NP_010960.1	YER042W
chrV	225220	225768	549	550	225539	511	81.4568	2.66773	79.8465	ubc92KR_IP_1_peak_202	Promoter (<=1kb)	5	223367	225199	1833	2	856758	NM_001178927	-21	ARB1	ATP-binding cassette family ATPase ARB1	protein_coding	NP_010953.1	YER036C
chrV	151722	152578	857	858	152082	477	48.029	2.11539	46.5291	ubc92KR_IP_1_peak_198	Promoter (<=1kb)	5	150301	150978	678	2	856717	NM_001178816	-744	IRC22	Irc22p	protein_coding	NP_010915.1	YEL001C
chrV	122533	123043	511	512	122616	240	3.56671	1.25571	2.40263	ubc92KR_IP_1_peak_194a	Promoter (<=1kb)	5	122798	122929	132	2	856697	NM_001180029	0	PMP2	proteolipid ATPase	protein_coding	NP_010898.1	YEL017C-A
chrV	116999	118748	1750	1751	118086	2394	1675.62	12.4789	1672.84	ubc92KR_IP_1_peak_193	Promoter (<=1kb)	5	117211	117474	264	1	856693	NM_001184349	0	TIM9	protein transporter TIM9	protein_coding	NP_010894.1	YEL020W-A
chrV	116289	116583	295	296	116484	250	4.72976	1.30781	3.54072	ubc92KR_IP_1_peak_192	Promoter (<=1kb)	5	116167	116970	804	1	856692	NM_001178836	122	URA3	orotidine-5'-phosphate decarboxylase	protein_coding	NP_010893.3	YEL021W
chrV	84936	87309	2374	2375	85366	513	82.3172	2.67815	80.7043	ubc92KR_IP_1_peak_190a	Promoter (<=1kb)	5	85045	85545	501	2	856676	NM_001178850	0	UTR5	Utr5p	protein_coding	NP_010879.1	YEL035C
chrV	77859	78984	1126	1127	78061	269	7.38741	1.40681	6.15582	ubc92KR_IP_1_peak_189a	Promoter (<=1kb)	5	78053	79456	1404	1	856671	NM_001178855	0	UTR2	Utr2p	protein_coding	NP_010874.3	YEL040W
chrV	67258	69549	2292	2293	67629	292	11.3514	1.52665	10.0732	ubc92KR_IP_1_peak_188a	Promoter (<=1kb)	5	67629	68792	1164	2	856665	NM_001178861	0	GLY1	threonine aldolase GLY1	protein_coding	NP_010868.1	YEL046C
chrV	51763	54490	2728	2729	52224	291	11.1627	1.52144	9.88659	ubc92KR_IP_1_peak_186a	Promoter (<=1kb)	5	52721	53218	498	2	856656	NM_001178869	0	RPL12A	ribosomal 60S subunit protein L12A	protein_coding	NP_010860.1	YEL054C
chrV	33114	33402	289	290	33397	124	3.28631	1.3508	2.08221	ubc92KR_IP_2_peak_183	Promoter (<=1kb)	5	31694	33466	1773	2	856646	NM_001178878	64	CAN1	arginine permease CAN1	protein_coding	NP_010851.1	YEL063C
chrV	31858	32388	531	532	32170	130	4.21374	1.41564	2.98018	ubc92KR_IP_2_peak_182	Promoter (<=1kb)	5	29797	31239	1443	2	856645	NM_001178879	-619	AVT2	Avt2p	protein_coding	NP_010850.1	YEL064C
chrV	16473	17275	803	804	16788	265	6.78034	1.38597	5.55726	ubc92KR_IP_1_peak_185	Promoter (<=1kb)	5	16355	17845	1491	1	856638	NM_001178886	118	DLD3	D-lactate dehydrogenase	protein_coding	NP_010843.1	YEL071W
chrV	13333	14351	1019	1020	13460	145	7.01476	1.57774	5.71369	ubc92KR_IP_2_peak_180a	Promoter (<=1kb)	5	13720	14415	696	1	856637	NM_001178887	0	RMD6	Rmd6p	protein_coding	NP_010842.1	YEL072W
chrIV	1524428	1525158	731	732	1524814	210	25.9613	2.28016	24.45	ubc92KR_IP_2_peak_136	Promoter (1-2kb)	4	1526321	1531711	5391	1	852158	NM_001180853	-1163	YRF1-1	Y' element ATP-dependent helicase protein 1 copy 1	protein_coding	NP_010834.1	YDR545W
chrIV	1524438	1525110	673	674	1524764	316	16.3034	1.6517	14.979	ubc92KR_IP_1_peak_142	Promoter (1-2kb)	4	1523249	1523611	363	1	852155	NM_001180850	1189	PAU10	seripauperin PAU10	protein_coding	NP_010831.3	YDR542W
chrIV	1467761	1468033	273	274	1467925	249	4.60596	1.3026	3.41925	ubc92KR_IP_1_peak_140	Promoter (<=1kb)	4	1466453	1468444	1992	2	852121	NM_001180816	411	GNP1	glutamine permease GNP1	protein_coding	NP_010796.1	YDR508C
chrIV	1461342	1462355	1014	1015	1461831	1037	397.221	5.40841	395.188	ubc92KR_IP_1_peak_139	Promoter (<=1kb)	4	1459728	1461554	1827	2	852117	NM_001180814	0	GMC1	putative oxidoreductase	protein_coding	NP_010794.3	YDR506C
chrIV	1452775	1454727	1953	1954	1453125	350	24.6349	1.82886	23.2522	ubc92KR_IP_1_peak_138a	Promoter (<=1kb)	4	1453310	1454464	1155	2	852113	NM_001180810	0	SAM2	methionine adenosyltransferase SAM2	protein_coding	NP_010790.3	YDR502C
chrIV	1450016	1451476	1461	1462	1451046	800	235.622	4.17354	233.76	ubc92KR_IP_1_peak_137	Promoter (<=1kb)	4	1450198	1450853	656	2	852111	NM_001180808	0	RPL37B	ribosomal 60S subunit protein L37B	protein_coding	NP_010788.1	YDR500C
chrIV	1447047	1447813	767	768	1447423	402	40.0729	2.0998	38.6052	ubc92KR_IP_1_peak_136	Promoter (<=1kb)	4	1447830	1450073	2244	1	852110	NM_001180807	-17	LCD1	Lcd1p	protein_coding	NP_010787.3	YDR499W
chrIV	1443596	1445791	2196	2197	1443893	190	19.0761	2.06403	17.6201	ubc92KR_IP_2_peak_130a	Promoter (<=1kb)	4	1443713	1445467	1755	2	852108	NM_001180805	0	ITR1	myo-inositol transporter ITR1	protein_coding	NP_010785.1	YDR497C
chrIV	1443372	1445995	2624	2625	1443949	500	76.7856	2.61042	75.1888	ubc92KR_IP_1_peak_135a	Promoter (<=1kb)	4	1441433	1443403	1971	2	852107	NM_001180804	0	PUF6	Puf6p	protein_coding	NP_010784.1	YDR496C
chrIV	1400456	1403446	2991	2992	1401452	3177	2586.13	16.5587	2583	ubc92KR_IP_1_peak_134a	Promoter (<=1kb)	4	1399706	1401214	1509	2	852081	NM_001180778	0	UGO1	Ugo1p	protein_coding	NP_010758.3	YDR470C
chrIV	1358961	1361091	2131	2132	1359619	1732	1502.51	18.7276	1499.46	ubc92KR_IP_2_peak_128a	Promoter (<=1kb)	4	1359923	1360798	876	1	852061	NM_001180758	0	RPS18A	ribosomal 40S subunit protein S18A	protein_coding	NP_010738.1	YDR450W
chrIV	1358768	1361097	2330	2331	1359617	2718	2040.66	14.1671	2037.73	ubc92KR_IP_1_peak_133	Promoter (<=1kb)	4	1357580	1358902	1323	2	852060	NM_001180757	0	UTP6	snoRNA-binding rRNA-processing protein UTP6	protein_coding	NP_010737.1	YDR449C
chrIV	1354674	1356451	1778	1779	1355085	353	25.4399	1.84449	24.0519	ubc92KR_IP_1_peak_132a	Promoter (<=1kb)	4	1354829	1355553	725	2	852058	NM_001180755	0	RPS17B	ribosomal 40S subunit protein S17B	protein_coding	NP_010735.3	YDR447C
chrIV	1329124	1329438	315	316	1329272	239	3.45957	1.2505	2.29817	ubc92KR_IP_1_peak_130	Promoter (<=1kb)	4	1328783	1330027	1245	1	852042	NM_001180740	341	NPL3	mRNA-binding protein NPL3	protein_coding	NP_010720.3	YDR432W
chrIV	1300541	1302447	1907	1908	1301133	1382	673.523	7.20601	671.254	ubc92KR_IP_1_peak_128a	Promoter (<=1kb)	4	1301616	1302113	498	1	852026	NM_001180726	0	RPL12B	ribosomal 60S subunit protein L12B	protein_coding	NP_010706.3	YDR418W
chrIV	1270104	1270690	587	588	1270283	229	2.48173	1.1984	1.34796	ubc92KR_IP_1_peak_127	Promoter (<=1kb)	4	1270068	1270733	666	1	852008	NM_001180707	36	HPT1	hypoxanthine phosphoribosyltransferase	protein_coding	NP_010687.3	YDR399W
chrIV	1256398	1257792	1395	1396	1257085	2063	1322.42	10.7543	1319.79	ubc92KR_IP_1_peak_126	Promoter (<=1kb)	4	1254937	1256847	1911	2	851998	NM_001180698	0	UBA2	E1 ubiquitin-activating protein UBA2	protein_coding	NP_010678.3	YDR390C
chrIV	1245670	1246081	412	413	1245802	315	16.0812	1.64649	14.7587	ubc92KR_IP_1_peak_125	Promoter (<=1kb)	4	1246084	1247982	1899	1	851994	NM_001180694	-3	MUS81	Mus81p	protein_coding	NP_010674.3	YDR386W
chrIV	1242820	1243268	449	450	1242972	120	2.73207	1.30758	1.54867	ubc92KR_IP_2_peak_122a	Promoter (<=1kb)	4	1243230	1245758	2529	1	851993	NM_001180693	0	EFT2	elongation factor 2	protein_coding	NP_010673.1	YDR385W
chrIV	1239363	1240129	767	768	1239701	388	35.6157	2.02685	34.1689	ubc92KR_IP_1_peak_124	Promoter (<=1kb)	4	1239492	1239824	333	1	851990	NM_001180690	0	RPP2B	ribosomal protein P2B	protein_coding	NP_010670.3	YDR382W
chrIV	1236037	1237280	1244	1245	1236647	179	15.6656	1.94516	14.2421	ubc92KR_IP_2_peak_119a	Promoter (<=1kb)	4	1236558	1238004	1447	1	851988	NM_001180689	0	YRA1	RNA-binding protein YRA1	protein_coding	NP_010669.1	YDR381W
chrIV	1233854	1237501	3648	3649	1233928	230	2.5718	1.20361	1.43514	ubc92KR_IP_1_peak_123a	Promoter (<=1kb)	4	1234218	1236125	1908	1	851987	NM_001180688	0	ARO10	phenylpyruvate decarboxylase ARO10	protein_coding	NP_010668.3	YDR380W
chrIV	1163479	1164809	1331	1332	1163576	250	4.72976	1.30781	3.54072	ubc92KR_IP_1_peak_120a	Promoter (<=1kb)	4	1162957	1164660	1704	2	851946	NM_001180653	0	HXT3	hexose transporter HXT3	protein_coding	NP_010632.1	YDR345C
chrIV	1150203	1151623	1421	1422	1150795	831	255.199	4.33507	253.314	ubc92KR_IP_1_peak_118a	Promoter (<=1kb)	4	1149951	1150520	570	2	851939	NM_001180647	0	FCF1	rRNA-processing protein FCF1	protein_coding	NP_010626.1	YDR339C
chrIV	1135442	1136235	794	795	1135871	440	53.208	2.29779	51.6885	ubc92KR_IP_1_peak_117	Promoter (<=1kb)	4	1135932	1140476	4545	1	851934	NM_001180642	0	SWR1	chromatin-remodeling protein SWR1	protein_coding	NP_010621.1	YDR334W
chrIV	1086104	1088253	2150	2151	1087215	3111	2505.82	16.2148	2502.71	ubc92KR_IP_1_peak_115	Promoter (<=1kb)	4	1087581	1088942	1362	1	851907	NM_001180620	0	SSF2	rRNA-binding ribosome biosynthesis protein	protein_coding	NP_010598.3	YDR312W
chrIV	1074873	1076125	1253	1254	1075526	1609	876.459	8.38877	874.059	ubc92KR_IP_1_peak_114	Promoter (<=1kb)	4	1073735	1075171	1437	2	851900	NM_001180614	0	PFU1	Pfu1p	protein_coding	NP_010592.1	YDR306C
chrIV	1012280	1013873	1594	1595	1012444	241	3.6755	1.26092	2.50882	ubc92KR_IP_1_peak_112a	Promoter (<=1kb)	4	1013476	1013643	168	2	851869	NM_001180584	0	PMP3	Pmp3p	protein_coding	NP_010562.1	YDR276C
chrIV	963598	964806	1209	1210	964083	159	10.2111	1.72903	8.85648	ubc92KR_IP_2_peak_107a	Promoter (<=1kb)	4	963990	964565	576	2	851840	NM_001180561	0	MET32	Met32p	protein_coding	NP_010539.1	YDR253C
chrIV	929280	930484	1205	1206	929675	302	13.3168	1.57876	12.0188	ubc92KR_IP_1_peak_108a	Promoter (<=1kb)	4	929470	930357	888	2	851819	NM_001180541	0	RTN1	Rtn1p	protein_coding	NP_010519.3	YDR233C
chrIV	914185	916422	2238	2239	914776	454	58.4104	2.37074	56.8721	ubc92KR_IP_1_peak_107a	Promoter (<=1kb)	4	914317	914712	396	2	851810	NM_001180532	0	HTB1	histone H2B	protein_coding	NP_010510.3	YDR224C
chrIV	896564	896864	301	302	896701	121	2.86575	1.31839	1.67702	ubc92KR_IP_2_peak_103	Promoter (1-2kb)	4	895035	899006	3972	1	851802	NM_001180524	1529	ADR1	DNA-binding transcription factor ADR1	protein_coding	NP_010502.3	YDR216W
chrIV	802195	803215	1021	1022	802792	1667	930.623	8.69098	928.193	ubc92KR_IP_1_peak_105	Promoter (<=1kb)	4	796193	802222	6030	2	851748	NM_001180477	0	SEC7	Arf family guanine nucleotide exchange factor SEC7	protein_coding	NP_010454.3	YDR170C
chrIV	768452	768739	288	289	768581	125	3.43295	1.36161	2.22372	ubc92KR_IP_2_peak_100	Promoter (<=1kb)	4	768512	769000	489	2	851733	NM_001180462	261	CPR1	peptidylprolyl isomerase CPR1	protein_coding	NP_010439.1	YDR155C
chrIV	702600	703301	702	703	702877	376	31.9678	1.96433	30.541	ubc92KR_IP_1_peak_103	Promoter (<=1kb)	4	701397	702758	1362	2	851703	NM_001180433	0	ECM18	alpha/beta hydrolase family protein	protein_coding	NP_010410.3	YDR125C
chrIV	644635	645399	765	766	645193	1233	548.973	6.42965	546.805	ubc92KR_IP_1_peak_101	Promoter (<=1kb)	4	644178	644930	753	2	851672	NM_001180406	0	GRX3	monothiol glutaredoxin GRX3	protein_coding	NP_010383.4	YDR098C
chrIV	619562	620580	1019	1020	620043	1358	652.97	7.08096	650.718	ubc92KR_IP_1_peak_100	Promoter (<=1kb)	4	618497	619645	1149	2	851661	NM_001180396	0	SLU7	mRNA splicing protein SLU7	protein_coding	NP_010373.3	YDR088C
chrIV	600709	602071	1363	1364	600819	229	2.48173	1.1984	1.34796	ubc92KR_IP_1_peak_99a	Promoter (<=1kb)	4	600793	601809	1017	1	851649	NM_001180385	0	SED1	Sed1p	protein_coding	NP_010362.3	YDR077W
chrIV	578699	580728	2030	2031	579265	900	300.545	4.69459	298.609	ubc92KR_IP_1_peak_98a	Promoter (<=1kb)	4	579458	580452	995	1	851636	NM_001180372	0	RPS13	ribosomal 40S subunit protein S13	protein_coding	NP_010349.3	YDR064W
chrIV	568286	569487	1202	1203	568909	2046	1304.87	10.6657	1302.25	ubc92KR_IP_1_peak_97	Promoter (<=1kb)	4	567723	568703	981	2	851628	NM_001180366	0	TGL2	triglyceride lipase	protein_coding	NP_010343.1	YDR058C
chrIV	555342	556891	1550	1551	555914	573	109.638	2.99078	107.956	ubc92KR_IP_1_peak_96a	Promoter (<=1kb)	4	555726	556472	747	2	851620	NM_001180358	0	TPI1	triose-phosphate isomerase TPI1	protein_coding	NP_010335.1	YDR050C
chrIV	548841	550654	1814	1815	549342	143	6.60288	1.55613	5.31001	ubc92KR_IP_2_peak_90a	Promoter (<=1kb)	4	548762	550576	1815	2	851616	NM_001180354	0	BAP3	amino acid transporter BAP3	protein_coding	NP_010331.3	YDR046C
chrIV	524978	525347	370	371	525160	299	12.7122	1.56313	11.42	ubc92KR_IP_1_peak_93	Promoter (<=1kb)	4	525440	527215	1776	1	851607	NM_001180345	-93	KRS1	lysine--tRNA ligase KRS1	protein_coding	NP_010322.1	YDR037W
chrIV	525725	526424	700	701	526217	256	5.50655	1.33908	4.30371	ubc92KR_IP_1_peak_94	Promoter (<=1kb)	4	525440	527215	1776	1	851607	NM_001180345	285	KRS1	lysine--tRNA ligase KRS1	protein_coding	NP_010322.1	YDR037W
chrIV	507552	509809	2258	2259	507769	331	19.7959	1.72986	18.4449	ubc92KR_IP_1_peak_91a	Promoter (<=1kb)	4	508147	509109	963	1	851597	NM_001180341	0	MRH1	Mrh1p	protein_coding	NP_010316.1	YDR033W
chrIV	490653	492510	1858	1859	491168	699	351.092	7.42776	348.831	ubc92KR_IP_2_peak_85a	Promoter (<=1kb)	4	491515	492324	810	1	851589	NM_001180333	0	RPS11A	ribosomal 40S subunit protein S11A	protein_coding	NP_010308.3	YDR025W
chrIV	488332	492592	4261	4262	488886	1394	683.868	7.26853	681.591	ubc92KR_IP_1_peak_90a	Promoter (<=1kb)	4	488072	488662	591	2	851585	NM_001180330	0	ATG31	Atg31p	protein_coding	NP_010305.1	YDR022C
chrIV	472815	473152	338	339	472975	296	12.1204	1.54749	10.8342	ubc92KR_IP_1_peak_89	Promoter (<=1kb)	4	473157	473783	627	1	851576	NM_001180321	-5	PSF1	DNA replication protein PSF1	protein_coding	NP_010296.3	YDR013W
chrIV	462001	462645	645	646	462371	636	56.8082	2.02057	55.2764	ubc92KR_IP_1_peak_88	Promoter (<=1kb)	4	461842	462516	675	1	851570	NM_001180315	159	TRP1	phosphoribosylanthranilate isomerase TRP1	protein_coding	NP_010290.3	YDR007W
chrIV	449322	450168	847	848	449799	1165	480.781	5.87965	478.668	ubc92KR_IP_1_peak_87	Promoter (1-2kb)	4	447984	449276	1293	1	851563	NM_001180060	1338	RMD1	Rmd1p	protein_coding	NP_010283.3	YDL001W
chrIV	427813	428459	647	648	428221	271	7.7004	1.41723	6.46458	ubc92KR_IP_1_peak_84	Promoter (<=1kb)	4	427364	428347	984	1	851548	NM_001180073	449	NOP1	rRNA methyltransferase NOP1	protein_coding	NP_010270.1	YDL014W
chrIV	392498	392783	286	287	392655	273	8.01948	1.42765	6.77961	ubc92KR_IP_1_peak_82	Promoter (<=1kb)	4	389172	392057	2886	2	851527	NM_001180094	-441	GPR1	Gpr1p	protein_coding	NP_010249.1	YDL035C
chrIV	355360	356950	1591	1592	356217	345	23.3178	1.8028	21.9436	ubc92KR_IP_1_peak_80a	Promoter (<=1kb)	4	355674	356759	1086	2	851504	NM_001180114	0	PSA1	mannose-1-phosphate guanylyltransferase	protein_coding	NP_010228.1	YDL055C
chrIV	340239	342652	2414	2415	341431	2986	2355.39	15.5635	2352.33	ubc92KR_IP_1_peak_79	Promoter (<=1kb)	4	340628	340798	171	2	851498	NM_001180120	0	RPS29B	ribosomal 40S subunit protein S29B	protein_coding	NP_010222.1	YDL061C
chrIV	337569	337931	363	364	337777	300	12.9124	1.56834	11.6182	ubc92KR_IP_1_peak_78	Promoter (<=1kb)	4	337487	338070	584	1	851495	NM_001180123	82	UBC9	E2 SUMO-conjugating protein UBC9	protein_coding	NP_010219.1	YDL064W
chrIV	320823	323785	2963	2964	321853	2726	2049.89	14.2088	2046.96	ubc92KR_IP_1_peak_77	Promoter (<=1kb)	4	320668	321552	885	2	851483	NM_001180135	0	RXT3	Rxt3p	protein_coding	NP_010207.1	YDL076C
chrIV	306374	310197	3824	3825	306787	287	10.4226	1.5006	9.15438	ubc92KR_IP_1_peak_76a	Promoter (<=1kb)	4	306926	307789	864	2	851476	NM_001180142	0	RPS16B	ribosomal 40S subunit protein S16B	protein_coding	NP_010200.1	YDL083C
chrIV	228606	230899	2294	2295	229668	1929	1185.79	10.0561	1183.23	ubc92KR_IP_1_peak_75	Promoter (<=1kb)	4	229171	229431	261	1	851426	NM_001184325	0	STF1	ATPase-binding protein	protein_coding	NP_010152.1	YDL130W-A
chrIV	221151	222729	1579	1580	222122	1913	1169.75	9.97274	1167.19	ubc92KR_IP_1_peak_74	Promoter (<=1kb)	4	221724	221801	78	2	851422	NM_001180194	0	RPL41B	ribosomal 60S subunit protein L41B	protein_coding	NP_010148.1	YDL133C-A
chrIV	132182	133485	1304	1305	132901	594	266.75	6.42983	264.594	ubc92KR_IP_2_peak_69	Promoter (<=1kb)	4	133437	134723	1287	1	851346	NM_001180242	0	LYS20	homocitrate synthase LYS20	protein_coding	NP_010099.1	YDL182W
chrIV	129534	133739	4206	4207	130769	3053	2435.74	15.9126	2432.65	ubc92KR_IP_1_peak_72a	Promoter (<=1kb)	4	130407	130484	78	2	851344	NM_001180244	0	RPL41A	ribosomal 60S subunit protein L41A	protein_coding	NP_010097.1	YDL184C
chrIV	216698	218393	1696	1697	217261	502	77.6272	2.62084	76.0279	ubc92KR_IP_1_peak_73a	Promoter (<=1kb)	4	217600	218367	768	1	851419	NM_001180251	0	RPL35B	ribosomal 60S subunit protein L35B	protein_coding	NP_010090.1	YDL136W
chrIV	116126	118832	2707	2708	117377	4675	4549.41	24.3639	4545.73	ubc92KR_IP_1_peak_71a	Promoter (<=1kb)	4	116321	116866	546	1	851335	NM_001180252	0	ARF1	Arf family GTPase ARF1	protein_coding	NP_010089.1	YDL192W
chrIV	44029	44539	511	512	44272	329	19.3132	1.71944	17.9653	ubc92KR_IP_1_peak_68	Promoter (<=1kb)	4	44065	45906	1842	1	851369	NM_001180289	0	SSB1	Hsp70 family ATPase SSB1	protein_coding	NP_010052.1	YDL229W
chrIV	45272	46107	836	837	45359	257	5.64168	1.34429	4.43657	ubc92KR_IP_1_peak_69a	Promoter (1-2kb)	4	44065	45906	1842	1	851369	NM_001180289	1207	SSB1	Hsp70 family ATPase SSB1	protein_coding	NP_010052.1	YDL229W
chrIII	294318	294741	424	425	294393	242	3.78593	1.26613	2.61663	ubc92KR_IP_1_peak_66	Promoter (<=1kb)	3	293835	294321	487	1	850459	NM_001178804	483	HMRA1	Hmra1p	protein_coding	NP_010021.1	YCR097W
chrIII	292803	293083	281	282	292942	294	11.733	1.53707	10.4508	ubc92KR_IP_1_peak_65	Promoter (<=1kb)	3	293179	293538	360	2	850458	NM_001178802	455	HMRA2	homeodomain mating type protein a2	protein_coding	NP_010020.1	YCR096C
chrIII	177130	179344	2215	2216	177617	319	16.9781	1.66733	15.648	ubc92KR_IP_1_peak_63a	Promoter (<=1kb)	3	177500	178220	721	2	850397	NM_001178745	0	RPS14A	ribosomal 40S subunit protein S14A	protein_coding	NP_009960.2	YCR031C
chrIII	167919	169303	1385	1386	168399	1278	585.807	6.66412	583.609	ubc92KR_IP_1_peak_62a	Promoter (<=1kb)	3	167370	167999	630	2	850392	NM_001178742	0	RHB1	putative GTPase RHB1	protein_coding	NP_009956.2	YCR027C
chrIII	142104	143197	1094	1095	142773	523	210.912	5.66257	208.846	ubc92KR_IP_2_peak_61	Promoter (<=1kb)	3	141217	142170	954	2	850373	NM_001178728	0	CTO1	Cto1p	protein_coding	NP_009941.2	YCR015C
chrIII	137411	139369	1959	1960	137982	594	119.857	3.1002	118.155	ubc92KR_IP_1_peak_60a	Promoter (<=1kb)	3	137746	138996	1251	1	850370	NM_001178725	0	PGK1	phosphoglycerate kinase	protein_coding	NP_009938.2	YCR012W
chrIII	120785	122380	1596	1597	121322	242	3.78593	1.26613	2.61663	ubc92KR_IP_1_peak_57a	Promoter (<=1kb)	3	120946	122328	1383	2	850361	NM_001178718	0	CIT2	citrate (Si)-synthase CIT2	protein_coding	NP_009931.1	YCR005C
chrIII	75846	78698	2853	2854	76541	375	31.6711	1.95912	30.246	ubc92KR_IP_1_peak_52a	Promoter (<=1kb)	3	76018	77919	1902	2	850333	NM_001178671	0	AGP1	amino acid transporter AGP1	protein_coding	NP_009905.3	YCL025C
chrIII	66251	68421	2171	2172	66360	241	3.6755	1.26092	2.50882	ubc92KR_IP_1_peak_51a	Promoter (<=1kb)	3	65934	68333	2400	2	850327	NM_001178675	0	HIS4	trifunctional histidinol dehydrogenase/phosphoribosyl-AMP cyclohydrolase/phosphoribosyl-ATP diphosphatase	protein_coding	NP_009900.2	YCL030C
chrIII	57667	58040	374	375	57841	252	4.98217	1.31824	3.78851	ubc92KR_IP_1_peak_50	Promoter (<=1kb)	3	57374	58678	1305	2	850320	NM_001178682	638	SRO9	Sro9p	protein_coding	NP_009893.2	YCL037C
chrIII	29028	29421	394	395	29221	367	29.3394	1.91743	27.9273	ubc92KR_IP_1_peak_49	Promoter (1-2kb)	3	27929	28936	1008	1	850303	NM_001178699	1099	KAR4	Kar4p	protein_coding	NP_009876.1	YCL055W
chrIII	14234	14949	716	717	14645	398	38.7777	2.07896	37.3159	ubc92KR_IP_1_peak_47	Promoter (<=1kb)	3	13282	13809	528	1	850293	NM_001178707	952	HMLALPHA1	transcriptional co-activator mating type protein alpha	protein_coding	NP_009867.1	YCL066W
chrIII	11045	11589	545	546	11265	395	37.8176	2.06332	36.3604	ubc92KR_IP_1_peak_46	Promoter (<=1kb)	3	11503	12285	783	2	850291	NM_001178709	696	.	uncharacterized protein	protein_coding	NP_009865.2	YCL068C
chrII	788869	791982	3114	3115	789129	182	16.568	1.97758	15.1354	ubc92KR_IP_2_peak_46a	Promoter (<=1kb)	2	789235	791814	2580	1	852597	NM_001178642	0	SUL1	sulfate permease	protein_coding	NP_009853.3	YBR294W
chrII	650340	651348	1009	1010	650886	174	14.2092	1.89113	12.8016	ubc92KR_IP_2_peak_44a	Promoter (<=1kb)	2	650368	651192	825	1	852514	NM_001178561	0	MET8	bifunctional precorrin-2 dehydrogenase/sirohydrochlorin ferrochelatase MET8	protein_coding	NP_009772.1	YBR213W
chrII	612547	613932	1386	1387	612692	139	5.81397	1.5129	4.53831	ubc92KR_IP_2_peak_41a	Promoter (<=1kb)	2	612236	613900	1665	2	852495	NM_001178544	0	PGI1	glucose-6-phosphate isomerase	protein_coding	NP_009755.1	YBR196C
chrII	603491	607434	3944	3945	604310	2562	1862.67	13.3543	1859.82	ubc92KR_IP_1_peak_40a	Promoter (<=1kb)	2	603685	604107	423	2	852486	NM_001178536	0	NTC20	Ntc20p	protein_coding	NP_009747.3	YBR188C
chrII	591258	591803	546	547	591627	344	23.058	1.79759	21.6856	ubc92KR_IP_1_peak_38	Promoter (<=1kb)	2	591712	592774	1063	2	852479	NM_001178529	971	RPS6B	ribosomal 40S subunit protein S6B	protein_coding	NP_009740.3	YBR181C
chrII	592292	593752	1461	1462	593066	2184	1449.04	11.3848	1446.35	ubc92KR_IP_1_peak_39	Promoter (<=1kb)	2	591712	592774	1063	2	852479	NM_001178529	0	RPS6B	ribosomal 40S subunit protein S6B	protein_coding	NP_009740.3	YBR181C
chrII	504449	504775	327	328	504599	298	12.5136	1.55791	11.2233	ubc92KR_IP_1_peak_37	Promoter (<=1kb)	2	504854	505306	453	1	852432	NM_001178483	-79	CKS1	cyclin-dependent protein kinase regulatory subunit CKS1	protein_coding	NP_009693.3	YBR135W
chrII	478921	479370	450	451	479083	420	46.1106	2.19359	44.6176	ubc92KR_IP_1_peak_36	Promoter (<=1kb)	2	479338	480323	986	1	852416	NM_001178467	0	MUD1	Mud1p	protein_coding	NP_009677.1	YBR119W
chrII	476538	477872	1335	1336	477258	2560	1860.42	13.3439	1857.56	ubc92KR_IP_1_peak_35	Promoter (<=1kb)	2	477671	479047	1377	1	852415	NM_001178466	0	TEF2	translation elongation factor EF-1 alpha	protein_coding	NP_009676.1	YBR118W
chrII	473955	474342	388	389	474145	322	17.6648	1.68296	16.3292	ubc92KR_IP_1_peak_34	Promoter (<=1kb)	2	469748	473926	4179	2	852412	NM_001178463	-29	LYS2	L-aminoadipate-semialdehyde dehydrogenase	protein_coding	NP_009673.1	YBR115C
chrII	413905	416612	2708	2709	414505	395	37.8176	2.06332	36.3604	ubc92KR_IP_1_peak_33a	Promoter (<=1kb)	2	414186	415261	1076	2	852379	NM_001180057	0	RPL19A	ribosomal 60S subunit protein L19A	protein_coding	NP_009641.1	YBR084C-A
chrII	396491	396793	303	304	396601	229	2.48173	1.1984	1.34796	ubc92KR_IP_1_peak_31	Promoter (1-2kb)	2	395383	398277	2895	2	852371	NM_001178427	1484	RPG1	translation initiation factor eIF3 core subunit a	protein_coding	NP_009635.1	YBR079C
chrII	392756	395483	2728	2729	393008	296	12.1204	1.54749	10.8342	ubc92KR_IP_1_peak_30a	Promoter (<=1kb)	2	393123	394742	1620	1	852370	NM_001178426	0	ECM33	Ecm33p	protein_coding	NP_009634.2	YBR078W
chrII	346952	348199	1248	1249	347594	1821	1078.61	9.49338	1076.1	ubc92KR_IP_1_peak_28	Promoter (<=1kb)	2	344602	347301	2700	2	852344	NM_001178403	0	PRP6	U4/U6-U5 snRNP complex subunit PRP6	protein_coding	NP_009611.1	YBR055C
chrII	331602	334078	2477	2478	332551	4674	4548.02	24.3587	4544.34	ubc92KR_IP_1_peak_27a	Promoter (<=1kb)	2	331833	332360	528	1	852336	NM_001178395	0	FMP23	Fmp23p	protein_coding	NP_009603.1	YBR047W
chrII	278457	278773	317	318	278607	300	12.9124	1.56834	11.6182	ubc92KR_IP_1_peak_24	Promoter (<=1kb)	2	276253	278352	2100	2	852307	NM_001178367	-105	GAL10	bifunctional UDP-glucose 4-epimerase/aldose 1-epimerase	protein_coding	NP_009575.1	YBR019C
chrII	256076	257212	1137	1138	256548	375	31.6711	1.95912	30.246	ubc92KR_IP_1_peak_23	Promoter (<=1kb)	2	256331	256741	411	1	852295	NM_001178358	0	HHT1	histone H3	protein_coding	NP_009564.1	YBR010W
chrII	255066	255686	621	622	255367	327	18.8357	1.70902	17.4911	ubc92KR_IP_1_peak_22	Promoter (<=1kb)	2	255373	255684	312	2	852294	NM_001178357	0	HHF1	histone H4	protein_coding	NP_009563.1	YBR009C
chrII	237882	238725	844	845	238342	413	104.808	3.64528	102.97	ubc92KR_IP_2_peak_24	Promoter (<=1kb)	2	237153	237467	315	2	852285	NM_001178241	-415	ECM15	Ecm15p	protein_coding	NP_009554.1	YBL001C
chrII	234923	238803	3881	3882	235404	386	34.9965	2.01643	33.553	ubc92KR_IP_1_peak_21a	Promoter (<=1kb)	2	235394	235792	399	2	852283	NM_001178243	0	HTA2	histone H2A	protein_coding	NP_009552.1	YBL003C
chrII	167488	169558	2071	2072	168131	1654	918.405	8.62324	915.982	ubc92KR_IP_1_peak_18a	Promoter (<=1kb)	2	167518	167838	321	2	852253	NM_001178268	0	.	uncharacterized protein	protein_coding	NP_009525.1	YBL028C
chrII	87746	88441	696	697	88055	480	68.5617	2.50621	66.9895	ubc92KR_IP_1_peak_16	Promoter (<=1kb)	2	86722	87789	1068	2	852205	NM_001178314	0	AAR2	U5 snRNP complex subunit AAR2	protein_coding	NP_009479.1	YBL074C
chrII	63146	63581	436	437	63389	323	17.8964	1.68817	16.5589	ubc92KR_IP_1_peak_15	Promoter (<=1kb)	2	63876	66818	2943	1	852193	NM_001178325	-295	BOI1	Boi1p	protein_coding	NP_009468.1	YBL085W
chrII	59859	61873	2015	2016	60301	395	37.8176	2.06332	36.3604	ubc92KR_IP_1_peak_14a	Promoter (<=1kb)	2	59822	60739	918	2	852191	NM_001178327	0	RPL23A	ribosomal 60S subunit protein L23A	protein_coding	NP_009466.1	YBL087C
chrII	44286	46701	2416	2417	45207	2454	1741.85	12.7916	1739.05	ubc92KR_IP_1_peak_13a	Promoter (<=1kb)	2	44256	44918	663	2	852184	NM_001178333	0	ROX3	Rox3p	protein_coding	NP_009459.1	YBL093C
chrI	151280	151838	559	560	151566	445	44.1552	2.09956	42.6705	ubc92KR_IP_1_peak_6	Promoter (<=1kb)	1	147594	151166	3573	2	851262	NM_001178148	-114	TFC3	transcription factor TFIIIC subunit TFC3	protein_coding	NP_009400.1	YAL001C
chrI	141991	143507	1517	1518	142354	319	16.9781	1.66733	15.648	ubc92KR_IP_1_peak_5a	Promoter (<=1kb)	1	142174	143160	987	1	851260	NM_001178150	0	EFB1	translation elongation factor 1 subunit beta	protein_coding	NP_009398.1	YAL003W
chrI	130813	131866	1054	1055	131152	274	8.18137	1.43286	6.93943	ubc92KR_IP_1_peak_3a	Promoter (<=1kb)	1	130799	131983	1185	1	851221	NM_001178157	14	CYS3	cystathionine gamma-lyase CYS3	protein_coding	NP_009390.1	YAL012W
chrI	34918	35239	322	323	35049	147	7.43808	1.59935	6.12888	ubc92KR_IP_2_peak_3	Promoter (<=1kb)	1	35155	36303	1149	1	851239	NM_001178202	0	BDH1	(R,R)-butanediol dehydrogenase	protein_coding	NP_009341.2	YAL060W
chrI	7163	9153	1991	1992	7293	132	4.54798	1.43726	3.30476	ubc92KR_IP_2_peak_2a	Promoter (<=1kb)	1	7235	9016	1782	2	851230	NM_001178208	0	SEO1	putative permease SEO1	protein_coding	NP_009333.1	YAL067C
chrI	233	1120	888	889	539	310	14.9905	1.62044	13.6776	ubc92KR_IP_1_peak_1	Promoter (1-2kb)	1	1807	2169	363	2	851229	NM_001180043	1049	PAU8	seripauperin PAU8	protein_coding	NP_009332.1	YAL068C
chrM	51881	52525	645	646	52309	1554	256.984	2.75646	255.097	ubc92KR_IP_1_peak_176	Promoter (2-3kb)	17	48901	50097	1197	1	854586	gene-Q0140	2980	VAR1	mitochondrial 37S ribosomal protein VAR1	protein_coding	NP_009320.1	Q0140
chrM	46245	46967	723	724	46371	938	12.6497	1.27759	11.3595	ubc92KR_IP_1_peak_174a	Promoter (<=1kb)	17	46723	46953	231	1	854584	gene-Q0130	0	OLI1	F0 ATP synthase subunit c	protein_coding	NP_009319.1	Q0130
chrXIII	550001	553305	3305	3306	550318	406	41.3852	2.12064	39.9119	ubc92KR_IP_1_peak_523a	Promoter (<=1kb)	13	549736	550044	309	2	855172	NM_001348868	0	.	uncharacterized protein	protein_coding	NP_001335808.1	YMR141C
chrVII	828312	829180	869	870	828797	838	259.689	4.37154	257.799	ubc92KR_IP_1_peak_299	Promoter (<=1kb)	7	828625	828960	336	1	853073	NM_001348843	0	.	uncharacterized protein	protein_coding	NP_001335783.1	YGR164W
chrVII	345382	346608	1227	1228	346007	826	252.007	4.30901	250.125	ubc92KR_IP_1_peak_263	Promoter (<=1kb)	7	345836	346201	366	1	852792	NM_001348836	0	.	uncharacterized protein	protein_coding	NP_001335777.1	YGL088W
chrV	437987	439414	1428	1429	438696	1544	816.837	8.05009	814.472	ubc92KR_IP_1_peak_221	Promoter (<=1kb)	5	437952	438344	393	2	856874	NM_001348826	0	.	uncharacterized protein	protein_coding	NP_001335768.1	YER135C
chrIV	1162704	1163194	491	492	1162925	290	9.50268	1.46526	8.24661	ubc92KR_IP_1_peak_119	Promoter (<=1kb)	4	1162006	1162449	444	2	851945	NM_001348817	-255	.	uncharacterized protein	protein_coding	NP_001335762.1	YDR344C
chrIII	122757	125513	2757	2758	123671	2765	2095.06	14.412	2092.1	ubc92KR_IP_1_peak_58a	Promoter (<=1kb)	3	122530	123003	474	2	850362	NM_001348894	0	.	uncharacterized protein	protein_coding	NP_001335749.1	YCR006C
chrII	642393	643221	829	830	643049	639	142.823	3.33467	141.08	ubc92KR_IP_1_peak_42	Promoter (<=1kb)	2	642583	642900	318	1	852508	NM_001348891	0	.	uncharacterized protein	protein_coding	NP_001335746.1	YBR209W
chrII	301151	301448	298	299	301284	327	18.8357	1.70902	17.4911	ubc92KR_IP_1_peak_25	Promoter (<=1kb)	2	301519	301821	303	1	852320	NM_001346796	-71	.	uncharacterized protein	protein_coding	NP_001333725.1	YBR032W
chrIV	409988	410749	762	763	410380	974	351.721	5.08016	349.734	ubc92KR_IP_1_peak_83	Promoter (<=1kb)	4	409808	410056	249	2	13393611	NM_001270741	0	.	uncharacterized protein	protein_coding	NP_001257670.1	YDL022C-A
chrVIII	450878	453059	2182	2183	451468	601	123.336	3.13667	121.627	ubc92KR_IP_1_peak_335a	Promoter (<=1kb)	8	450815	451153	339	2	856578	NM_001270738	0	.	uncharacterized protein	protein_coding	NP_001257667.1	YHR173C
chrIII	16354	17300	947	948	17041	416	44.7397	2.17274	43.2522	ubc92KR_IP_1_peak_48	Promoter (<=1kb)	3	15798	16880	1083	2	850295	NM_001178706	0	CHA1	L-serine/L-threonine ammonia-lyase CHA1	protein_coding	NP_001018030.1	YCL064C
chrII	680864	681183	320	321	681012	146	7.22499	1.58855	5.91982	ubc92KR_IP_2_peak_45	Promoter (<=1kb)	2	680362	680562	201	1	2777172	NM_001184673	502	COQ21	Coq21p	protein_coding	NP_001018029.1	YBR230W-A
chrM	54397	54942	546	547	54593	1361	206.503	2.62039	204.675	ubc92KR_IP_1_peak_177	Distal Intergenic	17	58009	62447	4439	1	9164988	rna-Q0158	-3067	21S_RRNA	21S ribosomal RNA	rRNA	.	Q0158
chrI	138758	139620	863	864	139150	933	323.053	4.86653	321.094	ubc92KR_IP_1_peak_4	Promoter (<=1kb)	1	139152	139254	103	1	851227	rna-tP(UGG)A	0	TRN1	tRNA-Pro	tRNA	.	tP(UGG)A
chrI	165956	166905	950	951	166262	1616	882.949	8.42524	880.544	ubc92KR_IP_1_peak_7	Promoter (<=1kb)	1	166267	166339	73	1	851270	rna-tA(UGC)A	0	TGA1	tRNA-Ala	tRNA	.	tA(UGC)A
chrI	180772	181776	1005	1006	181148	901	301.219	4.6998	299.283	ubc92KR_IP_1_peak_8	Promoter (<=1kb)	1	181141	181254	114	1	851277	rna-tL(CAA)A	0	SUP56	tRNA-Leu	tRNA	.	tL(CAA)A
chrIII	90531	91468	938	939	90845	1871	1127.9	9.7539	1125.36	ubc92KR_IP_1_peak_54	Promoter (<=1kb)	3	90859	90972	114	1	850341	rna-tL(CAA)C	0	SUP53	tRNA-Leu	tRNA	.	tL(CAA)C
chrIII	227441	228707	1267	1268	227951	1408	695.993	7.34148	693.707	ubc92KR_IP_1_peak_64	Promoter (<=1kb)	3	227942	228042	101	1	850426	rna-tS(CGA)C	0	SUP61	tRNA-Ser	tRNA	.	tS(CGA)C
chrIV	720660	721655	996	997	721042	374	31.3756	1.95391	29.9521	ubc92KR_IP_1_peak_104	Promoter (<=1kb)	4	721071	721481	411	2	851712	gene-YDR134C	0	CCW22	.	pseudogene	.	YDR134C
chrIV	945732	946937	1206	1207	946348	1096	441.338	5.71583	439.261	ubc92KR_IP_1_peak_109	Promoter (<=1kb)	4	946312	946400	89	1	851828	rna-tY(GUA)D	0	SUP2	tRNA-Tyr	tRNA	.	tY(GUA)D
chrIV	1175254	1176450	1197	1198	1175829	1418	704.691	7.39358	702.399	ubc92KR_IP_1_peak_121	Promoter (<=1kb)	4	1175829	1175901	73	1	851951	rna-tM(CAU)D	0	EMT1	tRNA-Met	tRNA	.	tM(CAU)D
chrM	6365	6770	406	407	6638	1182	18.3164	1.30693	16.9771	ubc92KR_IP_1_peak_168	Promoter (<=1kb)	17	6546	8194	1649	1	9164990	rna-Q0020	0	15S_RRNA	15S ribosomal RNA	rRNA	.	Q0020
chrM	57676	57949	274	275	57836	1988	137.997	1.85649	136.263	ubc92KR_IP_1_peak_180	Promoter (<=1kb)	17	58009	62447	4439	1	9164988	rna-Q0158	-60	21S_RRNA	21S ribosomal RNA	rRNA	.	Q0158
chrV	99568	102430	2863	2864	100147	1374	666.652	7.16432	664.389	ubc92KR_IP_1_peak_191a	Promoter (<=1kb)	5	100133	100204	72	1	856685	rna-tM(CAU)E	0	IMT4	tRNA-Met	tRNA	.	tM(CAU)E
chrV	287065	289093	2029	2030	287578	668	158.356	3.48577	156.59	ubc92KR_IP_1_peak_208a	Promoter (<=1kb)	5	288443	288524	82	2	856795	rna-tS(UGA)E	0	SUP19	tRNA-Ser	tRNA	.	tS(UGA)E
chrVI	100941	101791	851	852	101390	889	293.157	4.63727	291.23	ubc92KR_IP_1_peak_231	Promoter (<=1kb)	6	101376	101478	103	1	850526	rna-tP(UGG)F	0	SUF9	tRNA-Pro	tRNA	.	tP(UGG)F
chrVI	161698	162777	1080	1081	162230	1319	619.965	6.87775	617.74	ubc92KR_IP_1_peak_235	Promoter (<=1kb)	6	162228	162298	71	1	850560	rna-tG(GCC)F1	0	SUF20	tRNA-Gly	tRNA	.	tG(GCC)F1
chrVI	210229	211087	859	860	210684	936	325.125	4.88216	323.164	ubc92KR_IP_1_peak_240	Promoter (<=1kb)	6	210619	210707	89	2	850586	rna-tY(GUA)F2	0	SUP6	tRNA-Tyr	tRNA	.	tY(GUA)F2
chrVII	328353	329121	769	770	328606	1216	535.243	6.34108	533.085	ubc92KR_IP_1_peak_262	Promoter (<=1kb)	7	328583	328654	72	1	852784	rna-tE(UUC)G1	0	SOE1	tRNA-Glu	tRNA	.	tE(UUC)G1
chrVII	422567	423701	1135	1136	423088	1372	664.937	7.1539	662.675	ubc92KR_IP_1_peak_270	Promoter (<=1kb)	7	423092	423205	114	1	852843	rna-tL(CAA)G2	0	SUP54	tRNA-Leu	tRNA	.	tL(CAA)G2
chrVII	779053	780223	1171	1172	779608	1470	750.408	7.66452	748.086	ubc92KR_IP_1_peak_291	Promoter (<=1kb)	7	779616	779687	72	1	853046	rna-tG(UCC)G	0	SUF4	tRNA-Gly	tRNA	.	tG(UCC)G
chrX	354030	354513	484	485	354216	636	141.248	3.31904	139.508	ubc92KR_IP_1_peak_361	Promoter (<=1kb)	10	354244	354332	89	1	853402	rna-tY(GUA)J1	0	SUP7	tRNA-Tyr	tRNA	.	tY(GUA)J1
chrX	422473	425039	2567	2568	422954	1153	485.268	6.01282	483.152	ubc92KR_IP_1_peak_368a	Promoter (<=1kb)	10	422937	423009	73	1	853448	rna-tM(CAU)J2	0	EMT3	tRNA-Met	tRNA	.	tM(CAU)J2
chrX	531278	532298	1021	1022	531823	1240	554.657	6.46613	552.484	ubc92KR_IP_1_peak_376	Promoter (<=1kb)	10	531828	531898	71	1	853511	rna-tG(GCC)J2	0	SUF23	tRNA-Gly	tRNA	.	tG(GCC)J2
chrX	538223	539153	931	932	538538	1144	478.249	5.96593	476.138	ubc92KR_IP_1_peak_377	Promoter (<=1kb)	10	538555	538626	72	1	853515	rna-tR(CCU)J	0	HSX1	tRNA-Arg	tRNA	.	tR(CCU)J
chrXII	817791	820442	2652	2653	818694	2708	2029.13	14.115	2026.21	ubc92KR_IP_1_peak_481a	Promoter (<=1kb)	12	818609	818680	72	1	851057	rna-tR(CCG)L	0	TRR4	tRNA-Arg	tRNA	.	tR(CCG)L
chrXIII	168218	169329	1112	1113	168810	1250	562.806	6.51823	560.626	ubc92KR_IP_1_peak_503	Promoter (<=1kb)	13	168795	168883	89	1	854951	rna-tY(GUA)M1	0	SUP5	tRNA-Tyr	tRNA	.	tY(GUA)M1
chrXIII	572363	573462	1100	1101	572673	334	20.5296	1.74549	19.1737	ubc92KR_IP_1_peak_525a	Promoter (<=1kb)	13	572883	572955	73	2	855191	rna-tM(CAU)M	0	EMT4	tRNA-Met	tRNA	.	tM(CAU)M
chrXIII	807867	808672	806	807	808334	1025	388.423	5.34589	386.398	ubc92KR_IP_1_peak_537	Promoter (<=1kb)	13	808246	808317	72	2	855314	rna-tQ(CUG)M	0	CDC65	tRNA-Gln	tRNA	.	tQ(CUG)M
chrXIII	837354	838422	1069	1070	837921	1307	609.909	6.81523	607.692	ubc92KR_IP_1_peak_538	Promoter (<=1kb)	13	837928	838016	89	1	855327	rna-tY(GUA)M2	0	SUP8	tRNA-Tyr	tRNA	.	tY(GUA)M2
chrXIV	95688	96541	854	855	96065	497	75.5296	2.59479	73.9365	ubc92KR_IP_1_peak_546a	Promoter (<=1kb)	14	96241	96312	72	2	855432	rna-tG(UCC)N	0	SUF6	tRNA-Gly	tRNA	.	tG(UCC)N
chrXV	281586	282756	1171	1172	282158	1419	705.562	7.39879	703.269	ubc92KR_IP_1_peak_594	Promoter (<=1kb)	15	282164	282234	71	1	854137	rna-tG(GCC)O2	0	SUF17	tRNA-Gly	tRNA	.	tG(GCC)O2
chrXV	593452	595033	1582	1583	594419	5052	5079.52	26.3282	5075.7	ubc92KR_IP_1_peak_609	Promoter (<=1kb)	15	594354	594425	72	2	854311	rna-tG(CCC)O	0	SUF5	tRNA-Gly	tRNA	.	tG(CCC)O
chrXV	976019	978532	2514	2515	976428	3486	2969.86	18.1687	2966.63	ubc92KR_IP_1_peak_625a	Promoter (<=1kb)	15	976421	976493	73	1	854524	rna-tM(CAU)O2	0	EMT2	tRNA-Met	tRNA	.	tM(CAU)O2
chrXVI	689024	690153	1130	1131	689573	1482	761.073	7.72705	758.743	ubc92KR_IP_1_peak_656	Promoter (<=1kb)	16	689565	689646	82	1	856185	rna-tS(UGA)P	0	SUP16	tRNA-Ser	tRNA	.	tS(UGA)P
chrIII	142190	143355	1166	1167	142774	1313	614.931	6.84649	612.71	ubc92KR_IP_1_peak_61	Promoter (<=1kb)	3	142701	142771	71	2	850374	rna-tG(GCC)C	0	SUF16	tRNA-Gly	tRNA	.	tG(GCC)C
chrI	182132	183145	1014	1015	182641	976	353.139	5.09058	351.15	ubc92KR_IP_1_peak_9	Promoter (<=1kb)	1	182522	182603	82	2	851278	rna-tS(AGA)A	0	.	tRNA-Ser	tRNA	.	tS(AGA)A
chrII	8477	10505	2029	2030	9568	4762	4670.61	24.8172	4666.89	ubc92KR_IP_1_peak_11	Promoter (<=1kb)	2	9583	9666	84	1	852166	rna-tL(UAA)B1	0	.	tRNA-Leu	tRNA	.	tL(UAA)B1
chrII	35721	37005	1285	1286	35855	276	8.50959	1.44329	7.26362	ubc92KR_IP_1_peak_12a	Promoter (<=1kb)	2	36398	36488	91	1	852176	rna-tF(GAA)B	0	.	tRNA-Phe	tRNA	.	tF(GAA)B
chrII	196784	198624	1841	1842	197687	4042	3689.64	21.0657	3686.2	ubc92KR_IP_1_peak_19	Promoter (<=1kb)	2	197494	197567	74	1	852267	rna-tI(AAU)B	0	.	tRNA-Ile	tRNA	.	tI(AAU)B
chrII	226751	227743	993	994	227073	1792	1050.29	9.34228	1047.8	ubc92KR_IP_1_peak_20	Promoter (<=1kb)	2	227075	227156	82	1	852281	rna-tS(AGA)B	0	.	tRNA-Ser	tRNA	.	tS(AGA)B
chrII	326266	327406	1141	1142	326859	1410	697.73	7.3519	695.443	ubc92KR_IP_1_peak_26	Promoter (<=1kb)	2	326792	326865	74	2	852333	rna-tV(UAC)B	0	.	tRNA-Val	tRNA	.	tV(UAC)B
chrII	350369	351243	875	876	350823	1369	662.368	7.13827	660.108	ubc92KR_IP_1_peak_29	Promoter (<=1kb)	2	350827	350898	72	1	852347	rna-tQ(UUG)B	0	.	tRNA-Gln	tRNA	.	tQ(UUG)B
chrII	405287	406605	1319	1320	405894	1629	895.036	8.49298	892.625	ubc92KR_IP_1_peak_32	Promoter (<=1kb)	2	405878	405949	72	1	852374	rna-tR(UCU)B	0	.	tRNA-Arg	tRNA	.	tR(UCU)B
chrII	644527	645712	1186	1187	645191	1364	658.091	7.11222	655.835	ubc92KR_IP_1_peak_43	Promoter (<=1kb)	2	645167	645238	72	1	852510	rna-tE(UUC)B	0	.	tRNA-Glu	tRNA	.	tE(UUC)B
chrII	680592	681758	1167	1168	680976	362	27.92	1.89138	26.5163	ubc92KR_IP_1_peak_44a	Promoter (<=1kb)	2	680688	681862	1175	2	9164871	NR_132154	104	.	LSR1	snRNA	.	LSR1
chrIII	386	1355	970	971	1046	454	58.4104	2.37074	56.8721	ubc92KR_IP_1_peak_45	Promoter (<=1kb)	3	2126	2566	441	1	850287	rna-YCL075W	-771	.	.	pseudogene	.	YCL075W
chrIII	81900	82933	1034	1035	82571	2299	1572.08	11.984	1569.35	ubc92KR_IP_1_peak_53	Promoter (<=1kb)	3	82462	82533	72	2	850337	rna-tE(UUC)C	0	.	tRNA-Glu	tRNA	.	tE(UUC)C
chrIII	107378	107899	522	523	107691	312	15.4227	1.63086	14.1059	ubc92KR_IP_1_peak_55	Promoter (<=1kb)	3	107504	107712	209	2	9164875	NR_132155	0	.	SNR43	snoRNA	.	snR43
chrIII	127129	128133	1005	1006	127691	1086	433.761	5.66372	431.692	ubc92KR_IP_1_peak_59	Promoter (<=1kb)	3	127716	127789	74	1	850365	rna-tN(GUU)C	0	.	tRNA-Asn	tRNA	.	tN(GUU)C
chrIII	295299	295999	701	702	295528	836	258.404	4.36112	256.515	ubc92KR_IP_1_peak_67	Promoter (<=1kb)	3	295484	295556	73	1	850461	rna-tT(AGU)C	0	.	tRNA-Thr	tRNA	.	tT(AGU)C
chrIV	82926	84098	1173	1174	83544	1511	787.019	7.87815	784.673	ubc92KR_IP_1_peak_70	Promoter (<=1kb)	4	83548	83618	71	1	851316	rna-tG(GCC)D1	0	.	tRNA-Gly	tRNA	.	tG(GCC)D1
chrIV	359136	360056	921	922	359583	1443	726.569	7.52384	724.262	ubc92KR_IP_1_peak_81	Promoter (<=1kb)	4	359577	359672	96	1	851505	rna-tK(UUU)D	0	.	tRNA-Lys	tRNA	.	tK(UUU)D
chrIV	433812	434776	965	966	434323	1093	439.061	5.7002	436.986	ubc92KR_IP_1_peak_85	Promoter (<=1kb)	4	434264	434336	73	2	851555	rna-tT(AGU)D	0	.	tRNA-Thr	tRNA	.	tT(AGU)D
chrIV	437575	438380	806	807	437806	1235	550.595	6.44007	548.426	ubc92KR_IP_1_peak_86	Promoter (<=1kb)	4	437772	437853	82	1	851556	rna-tS(AGA)D1	0	.	tRNA-Ser	tRNA	.	tS(AGA)D1
chrIV	519406	521645	2240	2241	519740	1475	754.847	7.69058	752.521	ubc92KR_IP_1_peak_92a	Promoter (<=1kb)	4	519743	519826	84	1	851601	rna-tL(UAA)D	0	.	tRNA-Leu	tRNA	.	tL(UAA)D
chrIV	541284	542238	955	956	541786	529	89.3201	2.76152	87.6884	ubc92KR_IP_1_peak_95	Promoter (<=1kb)	4	541602	541700	99	2	9164877	NR_132160	0	.	SNR47	snoRNA	.	snR47
chrIV	667542	668196	655	656	668044	455	58.7892	2.37595	57.2495	ubc92KR_IP_1_peak_102	Promoter (<=1kb)	4	668007	668080	74	2	851684	rna-tI(AAU)D	0	.	tRNA-Ile	tRNA	.	tI(AAU)D
chrIV	884067	884831	765	766	884396	1036	396.486	5.4032	394.453	ubc92KR_IP_1_peak_106	Promoter (<=1kb)	4	884361	884493	133	1	851796	rna-tI(UAU)D	0	.	tRNA-Ile	tRNA	.	tI(UAU)D
chrIV	980481	981365	885	886	981048	1237	552.219	6.4505	550.048	ubc92KR_IP_1_peak_110	Promoter (<=1kb)	4	980974	981055	82	2	851849	rna-tS(AGA)D2	0	.	tRNA-Ser	tRNA	.	tS(AGA)D2
chrIV	992465	993357	893	894	992817	1396	685.596	7.27895	683.318	ubc92KR_IP_1_peak_111	Promoter (<=1kb)	4	992832	992902	71	1	851854	rna-tG(GCC)D2	0	.	tRNA-Gly	tRNA	.	tG(GCC)D2
chrIV	1016823	1017737	915	916	1017269	1124	462.761	5.86172	460.665	ubc92KR_IP_1_peak_113	Promoter (<=1kb)	4	1017207	1017278	72	2	851871	rna-tE(CUC)D	0	.	tRNA-Glu	tRNA	.	tE(CUC)D
chrIV	1094629	1095433	805	806	1095245	616	130.907	3.21483	129.185	ubc92KR_IP_1_peak_116	Promoter (<=1kb)	4	1095370	1095461	92	2	851912	rna-tF(GAA)D	28	.	tRNA-Phe	tRNA	.	tF(GAA)D
chrIV	1201129	1202467	1339	1340	1201745	1660	924.039	8.6545	921.613	ubc92KR_IP_1_peak_122	Promoter (<=1kb)	4	1201750	1201822	73	1	851966	rna-tK(CUU)D1	0	.	tRNA-Lys	tRNA	.	tK(CUU)D1
chrIV	1305078	1306110	1033	1034	1305562	686	168.273	3.57956	166.493	ubc92KR_IP_1_peak_129	Promoter (<=1kb)	4	1305630	1305712	83	1	852029	rna-tS(AGA)D3	0	.	tRNA-Ser	tRNA	.	tS(AGA)D3
chrIV	1352038	1353050	1013	1014	1352529	1020	384.775	5.31984	382.754	ubc92KR_IP_1_peak_131	Promoter (<=1kb)	4	1352466	1352538	73	2	852055	rna-tK(CUU)D2	0	.	tRNA-Lys	tRNA	.	tK(CUU)D2
chrIX	197199	198113	915	916	197592	1125	463.532	5.86693	461.434	ubc92KR_IP_1_peak_152	Promoter (<=1kb)	9	197592	197663	72	1	854720	rna-tE(CUC)I	0	.	tRNA-Glu	tRNA	.	tE(CUC)I
chrIX	210392	211288	897	898	210670	1494	771.78	7.78957	769.443	ubc92KR_IP_1_peak_153	Promoter (<=1kb)	9	210665	210738	74	1	854730	rna-tI(AAU)I2	0	.	tRNA-Ile	tRNA	.	tI(AAU)I2
chrIX	323844	326235	2392	2393	324367	1205	526.413	6.28376	524.263	ubc92KR_IP_1_peak_160a	Promoter (<=1kb)	9	324303	324374	72	2	854798	rna-tD(GUC)I1	0	.	tRNA-Asp	tRNA	.	tD(GUC)I1
chrIX	438951	439648	698	699	439280	312	15.4227	1.63086	14.1059	ubc92KR_IP_1_peak_166	Promoter (<=1kb)	9	437043	438179	1137	2	854861	gene-YIR043C	-772	.	.	pseudogene	.	YIR043C
chrM	7961	8461	501	502	8236	2839	457.203	2.72103	455.112	ubc92KR_IP_1_peak_169	Promoter (<=1kb)	17	9374	9447	74	1	854581	rna-tW(UCA)Q	-913	.	tRNA-Trp	tRNA	.	tW(UCA)Q
chrM	33956	34375	420	421	34254	785	20.3575	1.42161	19.0031	ubc92KR_IP_1_peak_172	Promoter (<=1kb)	17	35373	35444	72	1	854603	rna-tE(UUC)Q	-998	.	tRNA-Glu	tRNA	.	tE(UUC)Q
chrM	35294	36405	1112	1113	35421	1063	109.217	2.15452	107.536	ubc92KR_IP_1_peak_173a	Promoter (<=1kb)	17	35373	35444	72	1	854603	rna-tE(UUC)Q	0	.	tRNA-Glu	tRNA	.	tE(UUC)Q
chrM	47311	48262	952	953	47468	1524	189.01	2.35777	187.204	ubc92KR_IP_1_peak_175a	Promoter (<=1kb)	17	48201	48290	90	1	854585	rna-tS(UGA)Q2	0	.	tRNA-Ser	tRNA	.	tS(UGA)Q2
chrM	66719	67727	1009	1010	66912	1456	93.7575	1.80685	92.115	ubc92KR_IP_1_peak_181a	Promoter (<=1kb)	17	67061	67134	74	1	854611	rna-tK(UUU)Q	0	.	tRNA-Lys	tRNA	.	tK(UUU)Q
chrM	68216	70227	2012	2013	68313	681	43.9757	1.79599	42.4923	ubc92KR_IP_1_peak_182a	Promoter (<=1kb)	17	68322	68396	75	1	854614	rna-tD(GUC)Q	0	.	tRNA-Asp	tRNA	.	tD(GUC)Q
chrM	70691	71513	823	824	70822	1021	49.9661	1.65712	48.4584	ubc92KR_IP_1_peak_183a	Promoter (<=1kb)	17	70824	70907	84	1	854619	rna-tY(GUA)Q	0	.	tRNA-Tyr	tRNA	.	tY(GUA)Q
chrM	76694	77172	479	480	76917	2033	375.461	2.95521	373.449	ubc92KR_IP_1_peak_184	Promoter (<=1kb)	17	77431	77505	75	1	854624	rna-tF(GAA)Q	-259	.	tRNA-Phe	tRNA	.	tF(GAA)Q
chrV	60970	62260	1291	1292	61948	986	360.255	5.14268	358.259	ubc92KR_IP_1_peak_187	Promoter (<=1kb)	5	61890	61960	71	2	856661	rna-tG(GCC)E	0	.	tRNA-Gly	tRNA	.	tG(GCC)E
chrV	130800	131560	761	762	131181	764	213.542	3.98597	211.706	ubc92KR_IP_1_peak_195	Promoter (<=1kb)	5	131082	131153	72	2	856703	rna-tQ(UUG)E2	0	.	tRNA-Gln	tRNA	.	tQ(UUG)E2
chrV	134941	135980	1040	1041	135494	1443	726.569	7.52384	724.262	ubc92KR_IP_1_peak_196	Promoter (<=1kb)	5	135425	135497	73	2	856706	rna-tK(CUU)E1	0	.	tRNA-Lys	tRNA	.	tK(CUU)E1
chrV	138109	141358	3250	3251	138679	1368	661.512	7.13306	659.252	ubc92KR_IP_1_peak_197a	Promoter (<=1kb)	5	138666	138737	72	1	856708	rna-tR(UCU)E	0	.	tRNA-Arg	tRNA	.	tR(UCU)E
chrV	167143	167703	561	562	167493	293	11.5415	1.53186	10.2613	ubc92KR_IP_1_peak_199	Promoter (<=1kb)	5	167427	167586	160	2	9164888	NR_132167	0	.	SNR14	snRNA	.	snR14
chrV	176000	178524	2525	2526	177097	5164	5239.4	26.9118	5235.54	ubc92KR_IP_1_peak_200a	Promoter (<=1kb)	5	177099	177170	72	1	856730	rna-tE(UUC)E1	0	.	tRNA-Glu	tRNA	.	tE(UUC)E1
chrV	206553	208552	2000	2001	207343	2196	1461.76	11.4473	1459.07	ubc92KR_IP_1_peak_201	Promoter (<=1kb)	5	207357	207428	72	1	856747	rna-tH(GUG)E1	0	.	tRNA-His	tRNA	.	tH(GUG)E1
chrV	249769	250862	1094	1095	250299	1368	661.512	7.13306	659.252	ubc92KR_IP_1_peak_204	Promoter (<=1kb)	5	250286	250357	72	1	856773	rna-tQ(UUG)E1	0	.	tRNA-Gln	tRNA	.	tQ(UUG)E1
chrV	311576	312490	915	916	312100	987	360.969	5.14789	358.972	ubc92KR_IP_1_peak_211	Promoter (<=1kb)	5	312023	312095	73	2	856808	rna-tA(UGC)E	0	.	tRNA-Ala	tRNA	.	tA(UGC)E
chrV	354570	355568	999	1000	354945	1290	595.746	6.72665	593.54	ubc92KR_IP_1_peak_214	Promoter (<=1kb)	5	354934	355005	72	1	856833	rna-tE(UUC)E2	0	.	tRNA-Glu	tRNA	.	tE(UUC)E2
chrV	430569	432322	1754	1755	431355	4022	3663.14	20.9615	3659.71	ubc92KR_IP_1_peak_219	Promoter (<=1kb)	5	431129	431220	92	2	9164886	NR_132170	0	.	SNR52	snoRNA	.	snR52
chrV	433762	436208	2447	2448	434625	3007	2380.51	15.6729	2377.44	ubc92KR_IP_1_peak_220a	Promoter (<=1kb)	5	434541	434612	72	2	856871	rna-tH(GUG)E2	0	.	tRNA-His	tRNA	.	tH(GUG)E2
chrV	469010	470014	1005	1006	469448	1059	413.506	5.52304	411.456	ubc92KR_IP_1_peak_223	Promoter (<=1kb)	5	469457	469530	74	1	856894	rna-tV(AAC)E2	0	.	tRNA-Val	tRNA	.	tV(AAC)E2
chrV	486628	488191	1564	1565	487393	3053	2435.74	15.9126	2432.65	ubc92KR_IP_1_peak_224	Promoter (<=1kb)	5	487331	487402	72	2	856902	rna-tE(UUC)E3	0	.	tRNA-Glu	tRNA	.	tE(UUC)E3
chrVI	157421	158525	1105	1106	158020	1348	636.806	6.92311	634.567	ubc92KR_IP_1_peak_234	Promoter (<=1kb)	6	157916	158007	92	2	850557	rna-tF(GAA)F	0	.	tRNA-Phe	tRNA	.	tF(GAA)F
chrVI	191058	192099	1042	1043	191599	1425	710.797	7.43005	708.5	ubc92KR_IP_1_peak_238	Promoter (<=1kb)	6	191513	191613	101	2	850575	rna-tS(GCU)F	0	.	tRNA-Ser	tRNA	.	tS(GCU)F
chrVII	110176	111000	825	826	110695	1019	384.047	5.31462	382.026	ubc92KR_IP_1_peak_248	Promoter (<=1kb)	7	110625	110696	72	2	852668	rna-tH(GUG)G1	0	.	tRNA-His	tRNA	.	tH(GUG)G1
chrVII	115111	115976	866	867	115504	878	285.829	4.57996	283.91	ubc92KR_IP_1_peak_249	Promoter (<=1kb)	7	115488	115583	96	1	852671	rna-tK(UUU)G1	0	.	tRNA-Lys	tRNA	.	tK(UUU)G1
chrVII	121814	122766	953	954	122249	1032	393.548	5.38236	391.519	ubc92KR_IP_1_peak_250	Promoter (<=1kb)	7	122269	122341	73	1	852674	rna-tK(CUU)G1	0	.	tRNA-Lys	tRNA	.	tK(CUU)G1
chrVII	205200	205956	757	758	205544	710	181.812	3.70461	180.014	ubc92KR_IP_1_peak_253	Promoter (<=1kb)	7	205521	205634	114	1	852718	rna-tL(CAA)G1	0	.	tRNA-Leu	tRNA	.	tL(CAA)G1
chrVII	286980	288004	1025	1026	287442	1128	465.847	5.88256	463.747	ubc92KR_IP_1_peak_259	Promoter (<=1kb)	7	287350	287455	106	2	852759	rna-tW(CCA)G1	0	.	tRNA-Trp	tRNA	.	tW(CCA)G1
chrVII	319273	320311	1039	1040	319758	1391	681.277	7.2529	679.003	ubc92KR_IP_1_peak_261	Promoter (<=1kb)	7	319781	319852	72	1	852781	rna-tH(GUG)G2	0	.	tRNA-His	tRNA	.	tH(GUG)G2
chrVII	405148	406024	877	878	405490	1052	408.302	5.48657	406.258	ubc92KR_IP_1_peak_268	Promoter (<=1kb)	7	405470	405541	72	1	852831	rna-tR(UCU)G1	0	.	tRNA-Arg	tRNA	.	tR(UCU)G1
chrVII	411767	412913	1147	1148	412379	1494	771.78	7.78957	769.443	ubc92KR_IP_1_peak_269	Promoter (<=1kb)	7	412294	412367	74	2	852836	rna-tV(AAC)G1	0	.	tRNA-Val	tRNA	.	tV(AAC)G1
chrVII	531007	532116	1110	1111	531603	1123	461.991	5.85651	459.895	ubc92KR_IP_1_peak_275	Promoter (<=1kb)	7	531610	531681	72	1	852907	rna-tD(GUC)G1	0	.	tRNA-Asp	tRNA	.	tD(GUC)G1
chrVII	541463	542675	1213	1214	541839	2990	2360.17	15.5844	2357.11	ubc92KR_IP_1_peak_277	Promoter (<=1kb)	7	541850	541921	72	1	852914	rna-tE(UUC)G3	0	.	tRNA-Glu	tRNA	.	tE(UUC)G3
chrVII	544041	545826	1786	1787	544643	1551	823.202	8.08657	820.833	ubc92KR_IP_1_peak_278	Promoter (<=1kb)	7	544577	544648	72	2	852917	rna-tD(GUC)G2	0	.	tRNA-Asp	tRNA	.	tD(GUC)G2
chrVII	561038	562048	1011	1012	561734	1962	1219.08	10.228	1216.49	ubc92KR_IP_1_peak_280	Promoter (<=1kb)	7	561662	561743	82	2	852927	rna-tS(AGA)G	0	.	tRNA-Ser	tRNA	.	tS(AGA)G
chrVII	609151	610118	968	969	609455	399	39.0999	2.08417	37.6366	ubc92KR_IP_1_peak_282a	Promoter (<=1kb)	7	609584	609696	113	1	9164898	NR_132183	0	.	SNR48	snoRNA	.	snR48
chrVII	661040	662466	1427	1428	661737	2199	1464.94	11.4629	1462.25	ubc92KR_IP_1_peak_285	Promoter (<=1kb)	7	661749	661820	72	1	852981	rna-tT(UGU)G1	0	.	tRNA-Thr	tRNA	.	tT(UGU)G1
chrVII	700157	701133	977	978	700695	1161	491.533	6.0545	489.411	ubc92KR_IP_1_peak_286	Promoter (<=1kb)	7	700675	700756	82	1	852999	rna-tL(GAG)G	0	.	tRNA-Leu	tRNA	.	tL(GAG)G
chrVII	731111	731678	568	569	731306	494	74.2815	2.57916	72.6921	ubc92KR_IP_1_peak_288	Promoter (<=1kb)	7	731137	731210	74	1	853018	rna-tN(GUU)G	0	.	tRNA-Asn	tRNA	.	tN(GUU)G
chrVII	738529	739743	1215	1216	739107	1407	695.125	7.33627	692.84	ubc92KR_IP_1_peak_289	Promoter (<=1kb)	7	739122	739195	74	1	853024	rna-tI(AAU)G	0	.	tRNA-Ile	tRNA	.	tI(AAU)G
chrVII	773713	775044	1332	1333	774353	1709	970.394	8.90981	967.942	ubc92KR_IP_1_peak_290	Promoter (<=1kb)	7	774349	774421	73	1	853044	rna-tA(AGC)G	0	.	tRNA-Ala	tRNA	.	tA(AGC)G
chrVII	793687	794946	1260	1261	794421	1726	986.619	8.99839	984.159	ubc92KR_IP_1_peak_293	Promoter (<=1kb)	7	794417	794489	73	1	853054	rna-tA(UGC)G	0	.	tRNA-Ala	tRNA	.	tA(UGC)G
chrVII	844918	846384	1467	1468	845644	1712	973.252	8.92544	970.799	ubc92KR_IP_1_peak_300	Promoter (<=1kb)	7	845649	845719	71	1	853084	rna-tG(GCC)G1	0	.	tRNA-Gly	tRNA	.	tG(GCC)G1
chrVII	857078	857815	738	739	857465	604	124.837	3.1523	123.125	ubc92KR_IP_1_peak_301	Promoter (<=1kb)	7	857378	857491	114	2	853092	rna-tL(CAA)G3	0	.	tRNA-Leu	tRNA	.	tL(CAA)G3
chrVII	875832	877029	1198	1199	876407	1205	526.413	6.28376	524.263	ubc92KR_IP_1_peak_302	Promoter (<=1kb)	7	876394	876466	73	1	853101	rna-tK(CUU)G3	0	.	tRNA-Lys	tRNA	.	tK(CUU)G3
chrVII	930485	931584	1100	1101	931033	1445	728.327	7.53426	726.019	ubc92KR_IP_1_peak_307	Promoter (<=1kb)	7	930953	931023	71	2	853132	rna-tG(GCC)G2	0	.	tRNA-Gly	tRNA	.	tG(GCC)G2
chrVIII	133951	134844	894	895	134322	1486	764.637	7.74789	762.305	ubc92KR_IP_1_peak_323	Promoter (<=1kb)	8	134321	134392	72	1	856407	rna-tQ(UUG)H	0	.	tRNA-Gln	tRNA	.	tQ(UUG)H
chrVIII	145727	146968	1242	1243	146310	1587	856.15	8.27414	853.761	ubc92KR_IP_1_peak_325	Promoter (<=1kb)	8	146242	146314	73	2	856414	rna-tA(AGC)H	0	.	tRNA-Ala	tRNA	.	tA(AGC)H
chrVIII	237231	238345	1115	1116	237928	935	324.434	4.87695	322.473	ubc92KR_IP_1_peak_328	Promoter (<=1kb)	8	237848	237939	92	2	856469	rna-tF(GAA)H1	0	.	tRNA-Phe	tRNA	.	tF(GAA)H1
chrVIII	358063	358964	902	903	358563	961	342.549	5.01242	340.57	ubc92KR_IP_1_peak_329	Promoter (<=1kb)	8	358478	358569	92	2	856525	rna-tF(GAA)H2	0	.	tRNA-Phe	tRNA	.	tF(GAA)H2
chrVIII	410860	411606	747	748	411099	310	14.9905	1.62044	13.6776	ubc92KR_IP_1_peak_333a	Promoter (<=1kb)	8	411228	411317	90	1	9164902	NR_132189	0	.	SNR71	snoRNA	.	snR71
chrVIII	465911	468119	2209	2210	466974	7219	8340.47	37.6192	8335.89	ubc92KR_IP_1_peak_336	Promoter (<=1kb)	8	466990	467061	72	1	856586	rna-tT(UGU)H	0	.	tRNA-Thr	tRNA	.	tT(UGU)H
chrX	196941	197684	744	745	197393	1043	401.642	5.43967	399.604	ubc92KR_IP_1_peak_354	Promoter (<=1kb)	10	197313	197385	73	2	853328	rna-tA(AGC)J	0	.	tRNA-Ala	tRNA	.	tA(AGC)J
chrX	204266	205275	1010	1011	204724	1182	508.092	6.16392	505.957	ubc92KR_IP_1_peak_355	Promoter (<=1kb)	10	204735	204806	72	1	853331	rna-tD(GUC)J1	0	.	tRNA-Asp	tRNA	.	tD(GUC)J1
chrX	227740	228878	1139	1140	228455	685	167.716	3.57435	165.937	ubc92KR_IP_1_peak_356	Promoter (<=1kb)	10	228094	228479	386	2	9164908	NR_132195	0	.	SNR37	snoRNA	.	snR37
chrX	232599	235290	2692	2693	233926	8246	9991.1	42.9703	9985.84	ubc92KR_IP_1_peak_357	Promoter (<=1kb)	10	233939	234011	73	1	853343	rna-tR(ACG)J	0	.	tRNA-Arg	tRNA	.	tR(ACG)J
chrX	355240	356135	896	897	355459	1952	1208.96	10.1759	1206.39	ubc92KR_IP_1_peak_362	Promoter (<=1kb)	10	355374	355445	72	1	853403	rna-tR(UCU)J1	0	.	tRNA-Arg	tRNA	.	tR(UCU)J1
chrX	373910	375137	1228	1229	374553	1751	1010.61	9.12865	1008.14	ubc92KR_IP_1_peak_363	Promoter (<=1kb)	10	374424	374495	72	2	853411	rna-tD(GUC)J3	0	.	tRNA-Asp	tRNA	.	tD(GUC)J3
chrX	377823	378790	968	969	378374	1071	422.472	5.58557	420.414	ubc92KR_IP_1_peak_364	Promoter (<=1kb)	10	378360	378433	74	1	853415	rna-tV(AAC)J	0	.	tRNA-Val	tRNA	.	tV(AAC)J
chrX	523634	524811	1178	1179	524093	1126	464.303	5.87214	462.205	ubc92KR_IP_1_peak_375	Promoter (<=1kb)	10	524012	524093	82	2	853505	rna-tS(AGA)J	0	.	tRNA-Ser	tRNA	.	tS(AGA)J
chrX	541046	543588	2543	2544	541509	1125	463.532	5.86693	461.434	ubc92KR_IP_1_peak_378a	Promoter (<=1kb)	10	541508	541579	72	1	853517	rna-tD(GUC)J4	0	.	tRNA-Asp	tRNA	.	tD(GUC)J4
chrX	617410	618471	1062	1063	617922	1095	440.578	5.71062	438.502	ubc92KR_IP_1_peak_381	Promoter (<=1kb)	10	617919	618019	101	1	853564	rna-tL(UAG)J	0	.	tRNA-Leu	tRNA	.	tL(UAG)J
chrX	663940	664260	321	322	664089	277	8.676	1.4485	7.42806	ubc92KR_IP_1_peak_385	Promoter (<=1kb)	10	663749	663942	194	1	9164912	NR_132198	191	.	SNR3	snoRNA	.	snR3
chrXI	74127	75112	986	987	74640	1057	412.017	5.51262	409.969	ubc92KR_IP_1_peak_393	Promoter (<=1kb)	11	74624	74697	74	1	853637	rna-tN(GUU)K	0	.	tRNA-Asn	tRNA	.	tN(GUU)K
chrXI	83789	84657	869	870	84203	1086	433.761	5.66372	431.692	ubc92KR_IP_1_peak_394	Promoter (<=1kb)	11	84208	84291	84	1	853645	rna-tL(UAA)K	0	.	tRNA-Leu	tRNA	.	tL(UAA)K
chrXI	162089	163002	914	915	162536	870	280.536	4.53827	278.623	ubc92KR_IP_1_peak_400	Promoter (<=1kb)	11	162487	162558	72	2	853703	rna-tR(UCU)K	0	.	tRNA-Arg	tRNA	.	tR(UCU)K
chrXI	202960	203531	572	573	203130	625	135.527	3.26172	133.796	ubc92KR_IP_1_peak_402	Promoter (<=1kb)	11	202999	203071	73	1	853731	rna-tK(CUU)K	0	.	tRNA-Lys	tRNA	.	tK(CUU)K
chrXI	219372	220412	1041	1042	219885	1012	378.96	5.27815	376.945	ubc92KR_IP_1_peak_403	Promoter (<=1kb)	11	219895	219967	73	1	853742	rna-tA(AGC)K1	0	.	tRNA-Ala	tRNA	.	tA(AGC)K1
chrXI	302489	303516	1028	1029	302920	1161	491.533	6.0545	489.411	ubc92KR_IP_1_peak_406	Promoter (<=1kb)	11	302918	303023	106	1	853791	rna-tW(CCA)K	0	.	tRNA-Trp	tRNA	.	tW(CCA)K
chrXI	312966	313982	1017	1018	313480	1480	759.293	7.71663	756.964	ubc92KR_IP_1_peak_408	Promoter (<=1kb)	11	313401	313472	72	2	853797	rna-tH(GUG)K	0	.	tRNA-His	tRNA	.	tH(GUG)K
chrXI	379849	380240	392	393	380015	348	24.1044	1.81844	22.7251	ubc92KR_IP_1_peak_411	Promoter (<=1kb)	11	379680	379753	74	1	853835	rna-tV(AAC)K2	169	.	tRNA-Val	tRNA	.	tV(AAC)K2
chrXI	458219	459081	863	864	458577	942	329.281	4.91342	327.315	ubc92KR_IP_1_peak_416	Promoter (<=1kb)	11	458557	458670	114	1	853879	rna-tL(CAA)K	0	.	tRNA-Leu	tRNA	.	tL(CAA)K
chrXI	490605	491428	824	825	490957	1119	458.913	5.83567	456.82	ubc92KR_IP_1_peak_417	Promoter (<=1kb)	11	490968	491040	73	1	853897	rna-tR(ACG)K	0	.	tRNA-Arg	tRNA	.	tR(ACG)K
chrXI	517852	518583	732	733	518009	593	119.363	3.09499	117.662	ubc92KR_IP_1_peak_420	Promoter (<=1kb)	11	517988	518060	73	1	853913	rna-tA(AGC)K2	0	.	tRNA-Ala	tRNA	.	tA(AGC)K2
chrXI	558831	559556	726	727	559305	418	45.423	2.18316	43.9328	ubc92KR_IP_1_peak_423	Promoter (<=1kb)	11	559016	559366	351	2	9164915	NR_132203	0	.	SNR42	snoRNA	.	snR42
chrXI	578789	579466	678	679	579015	987	360.969	5.14789	358.972	ubc92KR_IP_1_peak_424	Promoter (<=1kb)	11	578965	579060	96	1	853948	rna-tK(UUU)K	0	.	tRNA-Lys	tRNA	.	tK(UUU)K
chrXII	92090	93167	1078	1079	92555	1233	548.973	6.42965	546.805	ubc92KR_IP_1_peak_433	Promoter (<=1kb)	12	92548	92650	103	1	850634	rna-tP(UGG)L	0	.	tRNA-Pro	tRNA	.	tP(UGG)L
chrXII	198194	199721	1528	1529	198829	559	103.009	2.91783	101.343	ubc92KR_IP_1_peak_436a	Promoter (<=1kb)	12	198784	199389	606	1	9164925	NR_132204	0	.	SNR30	snoRNA	.	snR30
chrXII	348260	348854	595	596	348518	346	23.5787	1.80801	22.2029	ubc92KR_IP_1_peak_445	Promoter (<=1kb)	12	348427	348510	84	2	9164937	NR_132205	0	.	SNR79	snoRNA	.	snR79
chrXII	365679	366859	1181	1182	366259	1468	660.816	6.52601	658.558	ubc92KR_IP_1_peak_446	Promoter (<=1kb)	12	366235	366346	112	1	9164922	NR_132206	0	.	SNR6	snRNA	.	snR6
chrXII	373631	374897	1267	1268	374343	1733	922.71	8.1298	920.285	ubc92KR_IP_1_peak_448	Promoter (<=1kb)	12	374355	374427	73	1	850804	rna-tR(ACG)L	0	.	tRNA-Arg	tRNA	.	tR(ACG)L
chrXII	425707	428397	2691	2692	427118	5698	5824.82	27.4232	5820.82	ubc92KR_IP_1_peak_450	Promoter (<=1kb)	12	427132	427203	72	1	850834	rna-tD(GUC)L1	0	.	tRNA-Asp	tRNA	.	tD(GUC)L1
chrXII	451163	451449	287	288	451357	265	6.78034	1.38597	5.55726	ubc92KR_IP_1_peak_454	Promoter (<=1kb)	12	451575	451785	211	2	9164936	NR_132208	336	.	external transcribed spacer	misc_RNA	.	ETS2-1
chrXII	459484	460852	1369	1370	459807	30964	5822.43	3.00344	5818.44	ubc92KR_IP_1_peak_455a	Promoter (<=1kb)	12	459676	459796	121	1	9164945	NR_132215	0	.	5S ribosomal RNA	rRNA	.	RDN5-1
chrXII	592072	593029	958	959	592611	1544	816.837	8.05009	814.472	ubc92KR_IP_1_peak_462	Promoter (<=1kb)	12	592519	592619	101	2	850925	rna-tL(UAG)L1	0	.	tRNA-Leu	tRNA	.	tL(UAG)L1
chrXII	605302	605651	350	351	605467	579	112.525	3.02204	110.837	ubc92KR_IP_1_peak_463	Promoter (<=1kb)	12	605300	605432	133	2	850931	rna-tI(UAU)L	0	.	tRNA-Ile	tRNA	.	tI(UAU)L
chrXII	627567	629183	1617	1618	628120	618	131.929	3.22525	130.205	ubc92KR_IP_1_peak_464a	Promoter (<=1kb)	12	628383	628497	115	1	850948	rna-tL(CAA)L	0	.	tRNA-Leu	tRNA	.	tL(CAA)L
chrXII	656878	657221	344	345	657038	235	3.04809	1.22966	1.89752	ubc92KR_IP_1_peak_466	Promoter (<=1kb)	12	656934	657006	73	2	850960	rna-tA(AGC)L	0	.	tRNA-Ala	tRNA	.	tA(AGC)L
chrXII	687560	688452	893	894	687935	945	331.365	4.92905	329.397	ubc92KR_IP_1_peak_469	Promoter (<=1kb)	12	687859	687932	74	2	850978	rna-tV(AAC)L	0	.	tRNA-Val	tRNA	.	tV(AAC)L
chrXII	731565	735421	3857	3858	732110	1275	569.234	6.45308	567.049	ubc92KR_IP_1_peak_474a	Promoter (<=1kb)	12	732090	732190	101	1	851009	rna-tL(UAG)L2	0	.	tRNA-Leu	tRNA	.	tL(UAG)L2
chrXII	783757	784853	1097	1098	784268	592	118.87	3.08978	117.17	ubc92KR_IP_1_peak_476a	Promoter (<=1kb)	12	784354	784453	100	1	851038	rna-tX(XXX)L	0	.	tRNA-OTHER	tRNA	.	tX(XXX)L
chrXII	793236	797894	4659	4660	793896	1534	807.769	7.99799	805.409	ubc92KR_IP_1_peak_477a	Promoter (<=1kb)	12	793918	793989	72	1	851044	rna-tD(GUC)L2	0	.	tRNA-Asp	tRNA	.	tD(GUC)L2
chrXII	962465	963773	1309	1310	963057	1579	848.797	8.23246	846.413	ubc92KR_IP_1_peak_488	Promoter (<=1kb)	12	962972	963055	84	2	851138	rna-tL(UAA)L	0	.	tRNA-Leu	tRNA	.	tL(UAA)L
chrXII	975606	976350	745	746	976071	819	247.56	4.27254	245.684	ubc92KR_IP_1_peak_489	Promoter (<=1kb)	12	975983	976056	74	2	851144	rna-tN(GUU)L	0	.	tRNA-Asn	tRNA	.	tN(GUU)L
chrXII	1051549	1052829	1281	1282	1052162	1894	1150.76	9.87374	1148.22	ubc92KR_IP_1_peak_493	Promoter (<=1kb)	12	1052071	1052144	74	2	851176	rna-tI(AAU)L2	0	.	tRNA-Ile	tRNA	.	tI(AAU)L2
chrXIII	67715	68030	316	317	67885	266	6.92974	1.39118	5.70445	ubc92KR_IP_1_peak_496	Promoter (<=1kb)	13	67768	67938	171	2	9164957	NR_132234	0	.	SNR85	snoRNA	.	snR85
chrXIII	91337	92594	1258	1259	91963	1795	1053.21	9.35791	1050.72	ubc92KR_IP_1_peak_497	Promoter (<=1kb)	13	91970	92027	58	1	23547382	NR_132235	0	.	ZOD1	ncRNA	.	ZOD1
chrXIII	183437	184316	880	881	183970	1519	755.534	7.40654	753.209	ubc92KR_IP_1_peak_504	Promoter (<=1kb)	13	183898	183968	71	2	854961	rna-tG(GCC)M	0	.	tRNA-Gly	tRNA	.	tG(GCC)M
chrXIII	258701	259708	1008	1009	259225	1362	656.383	7.1018	654.128	ubc92KR_IP_1_peak_507	Promoter (<=1kb)	13	259158	259239	82	2	855007	rna-tS(AGA)M	0	.	tRNA-Ser	tRNA	.	tS(AGA)M
chrXIII	290247	291413	1167	1168	290815	1335	633.446	6.96112	631.209	ubc92KR_IP_1_peak_509	Promoter (<=1kb)	13	290801	290872	72	1	855024	rna-tE(UUC)M	0	.	tRNA-Glu	tRNA	.	tE(UUC)M
chrXIII	371940	372860	921	922	372538	1435	719.547	7.48216	717.244	ubc92KR_IP_1_peak_515	Promoter (<=1kb)	13	372445	372518	74	2	855069	rna-tV(AAC)M1	0	.	tRNA-Val	tRNA	.	tV(AAC)M1
chrXIII	378838	380030	1193	1194	379406	1404	692.523	7.32064	690.239	ubc92KR_IP_1_peak_516	Promoter (<=1kb)	13	379303	379408	106	2	855072	rna-tW(CCA)M	0	.	tRNA-Trp	tRNA	.	tW(CCA)M
chrXIII	420133	421011	879	880	420639	784	225.72	4.09018	223.869	ubc92KR_IP_1_peak_517	Promoter (<=1kb)	13	420588	420661	74	2	855100	rna-tV(AAC)M2	0	.	tRNA-Val	tRNA	.	tV(AAC)M2
chrXIII	462935	464220	1286	1287	463559	1728	988.532	9.00881	986.071	ubc92KR_IP_1_peak_519	Promoter (<=1kb)	13	463554	463625	72	1	855124	rna-tD(GUC)M	0	.	tRNA-Asp	tRNA	.	tD(GUC)M
chrXIII	480269	481098	830	831	480687	945	331.365	4.92905	329.397	ubc92KR_IP_1_peak_520	Promoter (<=1kb)	13	480621	480693	73	2	855133	rna-tK(CUU)M	0	.	tRNA-Lys	tRNA	.	tK(CUU)M
chrXIII	504488	505390	903	904	504912	1003	372.453	5.23126	370.444	ubc92KR_IP_1_peak_522	Promoter (<=1kb)	13	504895	505008	114	1	855146	rna-tL(CAA)M	0	.	tRNA-Leu	tRNA	.	tL(CAA)M
chrXIII	625930	626843	914	915	626204	473	65.7675	2.46974	64.2041	ubc92KR_IP_1_peak_527	Promoter (<=1kb)	13	626349	626654	306	1	9164955	NR_132245	0	.	SNR83	snoRNA	.	snR83
chrXIII	747386	748183	798	799	747936	1256	567.712	6.54949	565.528	ubc92KR_IP_1_peak_533	Promoter (<=1kb)	13	747892	747963	72	2	855279	rna-tR(UCU)M1	0	.	tRNA-Arg	tRNA	.	tR(UCU)M1
chrXIV	88388	89308	921	922	89007	723	189.293	3.77234	187.486	ubc92KR_IP_1_peak_544	Promoter (<=1kb)	14	89210	89306	97	1	9164969	NR_132249	0	.	SNR40	snoRNA	.	snR40
chrXIV	102690	103235	546	547	102952	376	31.9678	1.96433	30.541	ubc92KR_IP_1_peak_547	Promoter (<=1kb)	14	102716	102789	74	1	855435	rna-tN(GUU)N1	0	.	tRNA-Asn	tRNA	.	tN(GUU)N1
chrXIV	104660	104962	303	304	104882	310	14.9905	1.62044	13.6776	ubc92KR_IP_1_peak_548	Promoter (<=1kb)	14	104805	104877	73	1	855437	rna-tT(AGU)N1	0	.	tRNA-Thr	tRNA	.	tT(AGU)N1
chrXIV	229775	230850	1076	1077	230564	310	14.9905	1.62044	13.6776	ubc92KR_IP_1_peak_550	Promoter (<=1kb)	14	230105	230672	568	2	9164965	NR_132250	0	.	SNR19	snRNA	.	snR19
chrXIV	442750	445243	2494	2495	442981	530	89.7647	2.76673	88.1319	ubc92KR_IP_1_peak_560a	Promoter (<=1kb)	14	443006	443119	114	1	855627	rna-tL(CAA)N	0	.	tRNA-Leu	tRNA	.	tL(CAA)N
chrXIV	559872	561345	1474	1475	560002	243	3.13645	1.23039	1.9857	ubc92KR_IP_1_peak_566a	Promoter (<=1kb)	14	560693	560765	73	2	855693	rna-tT(AGU)N2	0	.	tRNA-Thr	tRNA	.	tT(AGU)N2
chrXIV	567626	568674	1049	1050	568095	1331	630.068	6.94027	627.834	ubc92KR_IP_1_peak_567	Promoter (<=1kb)	14	568115	568217	103	1	855694	rna-tP(UGG)N2	0	.	tRNA-Pro	tRNA	.	tP(UGG)N2
chrXIV	585393	586520	1128	1129	585715	350	24.6349	1.82886	23.2522	ubc92KR_IP_1_peak_570	Promoter (<=1kb)	14	585587	585926	340	1	9164967	NR_132251	0	.	NME1	RNase_MRP_RNA	.	NME1
chrXIV	602012	602688	677	678	602315	806	239.371	4.20481	237.504	ubc92KR_IP_1_peak_571	Promoter (<=1kb)	14	602312	602385	74	1	855714	rna-tI(AAU)N2	0	.	tRNA-Ile	tRNA	.	tI(AAU)N2
chrXIV	722433	722848	416	417	722668	231	2.66366	1.20882	1.52412	ubc92KR_IP_1_peak_576	Promoter (<=1kb)	14	721938	722211	274	2	9164970	NR_132254	-222	.	SNR191	snoRNA	.	snR191
chrXIV	725713	726718	1006	1007	726226	1454	736.255	7.58116	733.941	ubc92KR_IP_1_peak_577	Promoter (<=1kb)	14	726134	726217	84	2	855791	rna-tL(UAA)N	0	.	tRNA-Leu	tRNA	.	tL(UAA)N
chrXV	113374	114240	867	868	113805	1115	455.841	5.81483	453.751	ubc92KR_IP_1_peak_585	Promoter (<=1kb)	15	113802	113874	73	1	854045	rna-tT(AGU)O1	0	.	tRNA-Thr	tRNA	.	tT(AGU)O1
chrXV	226154	227146	993	994	226668	1089	436.03	5.67935	433.959	ubc92KR_IP_1_peak_589	Promoter (<=1kb)	15	226611	226681	71	2	854100	rna-tG(GCC)O1	0	.	tRNA-Gly	tRNA	.	tG(GCC)O1
chrXV	227866	228771	906	907	228337	1114	455.075	5.80961	452.985	ubc92KR_IP_1_peak_590	Promoter (<=1kb)	15	228331	228404	74	1	854101	rna-tN(GUU)O1	0	.	tRNA-Asn	tRNA	.	tN(GUU)O1
chrXV	234202	234568	367	368	234347	257	5.64168	1.34429	4.43657	ubc92KR_IP_1_peak_591	Promoter (<=1kb)	15	234346	234546	201	1	9164973	NR_132256	0	.	SNR81	snoRNA	.	snR81
chrXV	353616	354673	1058	1059	354108	1238	553.031	6.45571	550.86	ubc92KR_IP_1_peak_600	Promoter (<=1kb)	15	354041	354113	73	2	854176	rna-tT(AGU)O2	0	.	tRNA-Thr	tRNA	.	tT(AGU)O2
chrXV	407777	408339	563	564	408108	346	23.5787	1.80801	22.2029	ubc92KR_IP_1_peak_601	Promoter (<=1kb)	15	407948	408134	187	2	9164974	NR_132258	0	.	SNR9	snoRNA	.	snR9
chrXV	409669	410051	383	384	409932	262	6.34145	1.37034	5.12494	ubc92KR_IP_1_peak_602	Promoter (<=1kb)	15	409765	409864	100	2	9164978	NR_132259	0	.	SNR62	snoRNA	.	snR62
chrXV	438200	439164	965	966	438634	1241	555.47	6.47134	553.296	ubc92KR_IP_1_peak_603	Promoter (<=1kb)	15	438643	438738	96	1	854224	rna-tK(UUU)O	0	.	tRNA-Lys	tRNA	.	tK(UUU)O
chrXV	486929	488012	1084	1085	487454	1306	609.074	6.81001	606.857	ubc92KR_IP_1_peak_606	Promoter (<=1kb)	15	487439	487512	74	1	854254	rna-tN(GUU)O2	0	.	tRNA-Asn	tRNA	.	tN(GUU)O2
chrXV	571334	572432	1099	1100	571959	1483	761.963	7.73226	759.633	ubc92KR_IP_1_peak_608	Promoter (<=1kb)	15	571958	572029	72	1	854298	rna-tD(GUC)O	0	.	tRNA-Asp	tRNA	.	tD(GUC)O
chrXV	663345	664339	995	996	663881	1066	418.728	5.55951	416.674	ubc92KR_IP_1_peak_611	Promoter (<=1kb)	15	663812	663885	74	2	854348	rna-tV(AAC)O	0	.	tRNA-Val	tRNA	.	tV(AAC)O
chrXV	758930	759627	698	699	759137	232	2.75721	1.21403	1.61488	ubc92KR_IP_1_peak_615a	Promoter (<=1kb)	15	759326	759529	204	2	9164977	NR_132261	0	.	SNR35	snoRNA	.	snR35
chrXV	841738	842766	1029	1030	842414	322	17.6648	1.68296	16.3292	ubc92KR_IP_1_peak_618	Promoter (<=1kb)	15	841958	842182	225	2	9164979	NR_132264	0	.	SNR31	snoRNA	.	snR31
chrXV	979290	981169	1880	1881	979704	260	6.05675	1.35992	4.84475	ubc92KR_IP_1_peak_626a	Promoter (<=1kb)	15	980683	980787	105	1	854526	rna-tP(UGG)O3	0	.	tRNA-Pro	tRNA	.	tP(UGG)O3
chrXVI	55739	56603	865	866	56274	1105	448.19	5.76272	446.108	ubc92KR_IP_1_peak_632	Promoter (<=1kb)	16	56169	56274	106	2	855815	rna-tW(CCA)P	0	.	tRNA-Trp	tRNA	.	tW(CCA)P
chrXVI	209614	210858	1245	1246	210260	1476	755.735	7.69579	753.409	ubc92KR_IP_1_peak_638	Promoter (<=1kb)	16	210192	210263	72	2	855924	rna-tE(UUC)P	0	.	tRNA-Glu	tRNA	.	tE(UUC)P
chrXVI	435373	436460	1088	1089	435960	1598	866.288	8.33146	863.893	ubc92KR_IP_1_peak_645	Promoter (<=1kb)	16	435893	435964	72	2	856046	rna-tC(GCA)P1	0	.	tRNA-Cys	tRNA	.	tC(GCA)P1
chrXVI	559641	560985	1345	1346	560286	1754	1013.5	9.14428	1011.03	ubc92KR_IP_1_peak_648	Promoter (<=1kb)	16	560198	560289	92	2	856109	rna-tF(GAA)P1	0	.	tRNA-Phe	tRNA	.	tF(GAA)P1
chrXVI	571643	572978	1336	1337	572301	1899	1155.75	9.89979	1153.2	ubc92KR_IP_1_peak_649	Promoter (<=1kb)	16	572269	572339	71	1	856116	rna-tG(GCC)P1	0	.	tRNA-Gly	tRNA	.	tG(GCC)P1
chrXVI	581558	582596	1039	1040	582078	1199	521.615	6.2525	519.469	ubc92KR_IP_1_peak_650	Promoter (<=1kb)	16	582062	582134	73	1	856120	rna-tK(CUU)P	0	.	tRNA-Lys	tRNA	.	tK(CUU)P
chrXVI	622010	623850	1841	1842	622646	1906	1162.74	9.93626	1160.19	ubc92KR_IP_1_peak_651a	Promoter (<=1kb)	16	622540	622631	92	2	856139	rna-tF(GAA)P2	0	.	tRNA-Phe	tRNA	.	tF(GAA)P2
chrXVI	718509	719499	991	992	719043	335	20.7768	1.7507	19.4193	ubc92KR_IP_1_peak_661	Promoter (<=1kb)	16	718700	718806	107	2	9164983	NR_132268	0	.	SNR51	snoRNA	.	snR51
chrXVI	768750	769958	1209	1210	769291	1476	755.735	7.69579	753.409	ubc92KR_IP_1_peak_664	Promoter (<=1kb)	16	769207	769302	96	2	856235	rna-tK(UUU)P	0	.	tRNA-Lys	tRNA	.	tK(UUU)P
chrXVI	775338	776336	999	1000	775848	1125	463.532	5.86693	461.434	ubc92KR_IP_1_peak_665	Promoter (<=1kb)	16	775765	775836	72	2	856238	rna-tC(GCA)P2	0	.	tRNA-Cys	tRNA	.	tC(GCA)P2
chrXVI	810363	812210	1848	1849	810661	1280	587.46	6.67454	585.261	ubc92KR_IP_1_peak_667a	Promoter (<=1kb)	16	810676	810749	74	1	856259	rna-tN(GUU)P	0	.	tRNA-Asn	tRNA	.	tN(GUU)P
chrXVI	819022	820123	1102	1103	819517	1100	444.379	5.73667	442.3	ubc92KR_IP_1_peak_668	Promoter (<=1kb)	16	819529	819602	74	1	856266	rna-tI(AAU)P1	0	.	tRNA-Ile	tRNA	.	tI(AAU)P1
chrXVI	856641	857489	849	850	856909	1808	1065.89	9.42564	1063.39	ubc92KR_IP_1_peak_670	Promoter (<=1kb)	16	856902	856974	73	1	856286	rna-tA(AGC)P	0	.	tRNA-Ala	tRNA	.	tA(AGC)P
chrXVI	879899	880980	1082	1083	880353	1046	403.858	5.45531	401.819	ubc92KR_IP_1_peak_672	Promoter (<=1kb)	16	880296	880369	74	2	856299	rna-tI(AAU)P2	0	.	tRNA-Ile	tRNA	.	tI(AAU)P2
chrXIV	631304	633233	1930	1931	631914	1035	683.39	11.1955	680.848	ubc92KR_IP_2_peak_565a	Promoter (<=1kb)	14	631846	631917	72	2	855734	rna-tP(AGG)N	0	SUF10	tRNA-Pro	tRNA	.	tP(AGG)N
chrXV	709765	710784	1020	1021	710178	1151	808.373	12.449	805.746	ubc92KR_IP_2_peak_606	Promoter (<=1kb)	15	710201	710272	72	1	854367	rna-tM(CAU)O1	0	IMT1	tRNA-Met	tRNA	.	tM(CAU)O1
chrM	56620	56951	332	333	56776	1536	127.291	1.97752	125.575	ubc92KR_IP_1_peak_179	Promoter (1-2kb)	17	58009	62447	4439	1	9164988	rna-Q0158	-1058	21S_RRNA	21S ribosomal RNA	rRNA	.	Q0158
chrM	10707	11661	955	956	10780	827	7.82377	1.21886	6.58785	ubc92KR_IP_1_peak_170a	Promoter (1-2kb)	17	9374	9447	74	1	854581	rna-tW(UCA)Q	1333	.	tRNA-Trp	tRNA	.	tW(UCA)Q
chrM	55355	55676	322	323	55511	1389	146.976	2.18703	145.226	ubc92KR_IP_1_peak_178	Promoter (2-3kb)	17	58009	62447	4439	1	9164988	rna-Q0158	-2333	21S_RRNA	21S ribosomal RNA	rRNA	.	Q0158
chrM	2923	3245	323	324	3071	1425	120.706	1.99342	119.003	ubc92KR_IP_1_peak_167	Promoter (2-3kb)	17	731	802	72	1	854578	rna-tP(UGG)Q	2192	.	tRNA-Pro	tRNA	.	tP(UGG)Q
chrM	32901	33196	296	297	33059	1313	144.559	2.22583	142.813	ubc92KR_IP_1_peak_171	Promoter (2-3kb)	17	35373	35444	72	1	854603	rna-tE(UUC)Q	-2177	.	tRNA-Glu	tRNA	.	tE(UUC)Q

## Sheet: Genes increased by Ubc9-2KR
Gene Name	Annotation
ACC1	Promoter
ADE12	Promoter
ADE17	Promoter
ADE3	Promoter
ADY4	Promoter
AIP5	Promoter
ALD5	Promoter
ARG4	Promoter
ARG5	Promoter
ARO10	Promoter
ATG19	Promoter
AVT2	Promoter
BIO2	Promoter
BIO4	Promoter
BIO5	Promoter
BUD22	Promoter
CAN1	Promoter
CIT1	Promoter
CIT2	Promoter
COI1	Promoter
CPA1	Promoter
CPR1	Promoter
CYS3	Promoter
CYS4	Promoter
DLD3	Promoter
DUG3	Promoter
EMT2	Promoter
ENO1	Promoter
ERG11	Promoter
ERG4	Promoter
EXG1	Promoter
FBP1	Promoter
FKS1	Promoter
FMO1	Promoter
FMP23	Promoter
FYV6	Promoter
GAT1	Promoter
GPM1	Promoter
GSH1	Promoter
HIS4	Promoter
HOM3	Promoter
INO1	Promoter
INP2	Promoter
IOC2	Promoter
ISW2	Promoter
JJJ2	Promoter
KAR4	Promoter
LYS1	Promoter
LYS20	Promoter
MET10	Promoter
MET13	Promoter
MET14	Promoter
MET3	Promoter
MET32	Promoter
MET6	Promoter
MF(ALPHA)1	Promoter
MHT1	Promoter
MMP1	Promoter
MOB2	Promoter
MPD1	Promoter
MTC3	Promoter
MTR3	Promoter
MUP1	Promoter
MXR1	Promoter
NCW1	Promoter
NPA3	Promoter
OCA5	Promoter
OLE1	Promoter
OPT1	Promoter
OPT2	Promoter
PAN1	Promoter
PAU10	Promoter
PAU8	Promoter
PDC1	Promoter
PEX9	Promoter
PGK1	Promoter
PHO84	Promoter
PLB3	Promoter
PRP6	Promoter
PSF1	Promoter
PUF6	Promoter
PUT1	Promoter
RIM4	Promoter
RMD6	Promoter
RNR1	Promoter
ROF1	Promoter
RPG1	Promoter
RPL13B	Promoter
RPL2B	Promoter
RPL43B	Promoter
RPS18A	Promoter
RPS4A	Promoter
RPS7A	Promoter
RPS7B	Promoter
SAH1	Promoter
SAM1	Promoter
SAM2	Promoter
SAM3	Promoter
SCS3	Promoter
SED1	Promoter
SEO1	Promoter
SER33	Promoter
SLX8	Promoter
SOD1	Promoter
SRO9	Promoter
SSF2	Promoter
SSZ1	Promoter
SUF5	Promoter
SUL2	Promoter
TDH1	Promoter
TDH2	Promoter
TFA1	Promoter
TGL2	Promoter
TRP1	Promoter
TTI2	Promoter
UBA2	Promoter
UBC9	Promoter
URA2	Promoter
URA3	Promoter
VHT1	Promoter
VPS13	Promoter
YRF1-1	Promoter
ZEO1	Promoter

## Sheet: Genes decreased by Ubc9-2KR
Gene Name	Annotation
ACT1	Promoter
AMN1	Promoter
AQR1	Promoter
ARF2	Promoter
ARG4	Promoter
ARG8	Promoter
BAP2	Promoter
BAT1	Promoter
BUD4	Promoter
CCW14	Promoter
CHA1	Promoter
CLB1	Promoter
CLB3	Promoter
COS5	Promoter
COS6	Promoter
CTR1	Promoter
CYB5	Promoter
DOT6	Promoter
ECM15	Promoter
ECM25	Promoter
ECM9	Promoter
ERG5	Promoter
FRM2	Promoter
FSF1	Promoter
FUR1	Promoter
GIS2	Promoter
GIS3	Promoter
GLY1	Promoter
HHO1	Promoter
HMLALPHA1	Promoter
HMRA1	Promoter
HMRA2	Promoter
IDH2	Promoter
ILV2	Promoter
ILV5	Promoter
IMD2	Promoter
KAP95	Promoter
LEU4	Promoter
MAM3	Promoter
MDH2	Promoter
MEP3	Promoter
MFA1	Promoter
MFA2	Promoter
MHO1	Promoter
MIN3	Promoter
MNT3	Promoter
MRPS17	Promoter
MRPS18	Promoter
MTR3	Promoter
NOP58	Promoter
OAC1	Promoter
PAU10	Promoter
PAU16	Promoter
PAU8	Promoter
PAU9	Promoter
PCL2	Promoter
PEX21	Promoter
PEX34	Promoter
PHO5	Promoter
PMP1	Promoter
PNO1	Promoter
POR1	Promoter
PRM1	Promoter
PTI1	Promoter
QCR9	Promoter
RDT1	Promoter
RNH203	Promoter
RPA34	Promoter
RPL22B	Promoter
RPL34B	Promoter
RPL35B	Promoter
RPL36B	Promoter
RPL42A	Promoter
RPS8B	Promoter
RQC1	Promoter
RVB1	Promoter
SCM3	Promoter
SEN2	Promoter
SHU2	Promoter
SIR1	Promoter
SMX3	Promoter
STE12	Promoter
STE2	Promoter
SUP4	Promoter
SUR7	Promoter
TAL1	Promoter
TDA2	Promoter
TEF1	Promoter
TIF2	Promoter
TIM9	Promoter
TRR1	Promoter
TRX1	Promoter
URA2	Promoter
VAC7	Promoter
YPS1	Promoter
YRF1-6	Promoter
ZRT2	Promoter

## Sheet: ncRNAs increased by Ubc9-2KR
Locus Tag	Annotation	Decription
tQ(UUG)E1	Promoter	tRNA-Gln
tL(CAA)L	Promoter	tRNA-Leu
tR(UCU)J1	Promoter	tRNA-Arg
tF(GAA)P2	Promoter	tRNA-Phe
tI(AAU)L2	Promoter	tRNA-Ile
tD(GUC)J3	Promoter	tRNA-Asp
tR(UCU)B	Promoter	tRNA-Arg
YKL068W-A	Promoter	uncharacterized protein
tH(GUG)E1	Promoter	tRNA-His
tE(UUC)G3	Promoter	tRNA-Glu
tL(UAA)B1	Promoter	tRNA-Leu
tI(AAU)B	Promoter	tRNA-Ile
tE(UUC)E1	Promoter	tRNA-Glu
tR(ACG)J	Promoter	tRNA-Arg
tT(UGU)H	Promoter	tRNA-Thr
YOR292C	Promoter	uncharacterized protein
YOR289W	Promoter	uncharacterized protein
YOR192C-B	Promoter	gag-pol fusion protein
YOL038C-A	Promoter	uncharacterized protein
YMR045C	Promoter	gag-pol fusion protein
YLR257W	Promoter	uncharacterized protein
YIR016W	Promoter	uncharacterized protein
YHR218W	Promoter	uncharacterized protein
YFL064C	Promoter	uncharacterized protein
YDR344C	Promoter	uncharacterized protein
YCR006C	Promoter	uncharacterized protein
tT(AGU)N2	Promoter	tRNA-Thr
tQ(UUG)B	Promoter	tRNA-Gln
tD(GUC)I1	Promoter	tRNA-Asp
snR83	Promoter	SNR83
snR79	Promoter	SNR79
snR42	Promoter	SNR42
snR35	Promoter	SNR35
snR30	Promoter	SNR30

## Sheet: ncRNAs decreased by Ubc9-2KR
Locus Tag	Annotation	Decription
YCL068C	Promoter	uncharacterized protein
snR79	Promoter	SNR79
YOL166W-A	Promoter	uncharacterized protein
snR79	Promoter	SNR79
tL(CAA)G1	Promoter	tRNA-Leu
YIR043C	Promoter	.
YLL066C	Promoter	Y' element ATP-dependent helicase
snR40	Promoter	SNR40
tL(CAA)G3	Promoter	tRNA-Leu
YGR164W	Promoter	uncharacterized protein
tR(UCU)K	Promoter	tRNA-Arg
tK(UUU)G1	Promoter	tRNA-Lys
YPL199C	Promoter	uncharacterized protein
tI(UAU)D	Promoter	tRNA-Ile
YLR462W	Promoter	uncharacterized protein
YCL075W	Promoter	.
snR6	Promoter	SNR6
RDN5-1	Promoter	5S ribosomal RNA
