# Supplementary material for: Auto-sumoylation of the Ubc9 E2 SUMO-conjugating Enzyme Extends Cellular Lifespan
Source: Research Square preprint supplement (doi:10.21203/rs.3.rs-4016606/v1), 2024-03-21
Supplement: Supplementary file 4 [file cddef97c726d8d9e0b08e68c.xlsx]

## Sheet: 1
Bio View:60 Proteins in 51 Clusters	Alternate ID	Class	Ref	Molecular Weight	No Tag	WT	WT_500G	ulp2	ulp2_500G_6	ulp2_500G_9
40S ribosomal protein S17-A OS=Saccharomyces cerevisiae (strain ATCC 204508 / S288c) GN=RPS17A PE=1 SV=1	RPS17A	Ribosome	Sung MK, et al. (2013) PMID:23403034	16 kDa	1	1	1	1	0.25	1
60S ribosomal protein L13-A OS=Saccharomyces cerevisiae (strain ATCC 204508 / S288c) GN=RPL13A PE=1 SV=1	RPL13A	Ribosome	Miguel E, et al. (2017) Microbial cell	23 kDa	1	1	1	1	1	1
Cluster of 60S ribosomal protein L37-A OS=Saccharomyces cerevisiae (strain ATCC 204508 / S288c) GN=RPL37A PE=1 SV=2 (P49166)	RPL37A	Ribosome	Sung MK, et al. (2013) PMID:23403034	10 kDa	1	1	1	1	1	1
Ubiquitin-like protein SMT3 OS=Saccharomyces cerevisiae (strain ATCC 204508 / S288c) GN=SMT3 PE=1 SV=1	SMT3	SUMO	Yu H, et al. (2008) PMID:18719252	12 kDa		1	1	1	1	1
Cluster of 60S ribosomal protein L36-B OS=Saccharomyces cerevisiae (strain ATCC 204508 / S288c) GN=RPL36B PE=1 SV=3 (O14455)	RPL36B	Ribosome	Sung MK, et al. (2013) PMID:23403034	11 kDa	1	1	0.96	1	0.93	1
60S ribosomal protein L19-A OS=Saccharomyces cerevisiae (strain ATCC 204508 / S288c) GN=RPL19A PE=1 SV=1	RPL19A	Ribosome	James A, et al. (2014) JBC	22 kDa	1	1	0.96	1		1
Cluster of 60S ribosomal protein L24-B OS=Saccharomyces cerevisiae (strain ATCC 204508 / S288c) GN=RPL24B PE=1 SV=1 (P24000)	RPL24B	Ribosome	Sung MK, et al. (2013) PMID:23403034	18 kDa	1	1	0.81	1	1	1
RNA annealing protein YRA1 OS=Saccharomyces cerevisiae (strain ATCC 204508 / S288c) GN=YRA1 PE=1 SV=2	YRA1	mRNA processing	Chymkowitch, et al. (2012) PNAS	25 kDa	1	1	0.58	1	1	1
60S ribosomal protein L26-A OS=Saccharomyces cerevisiae (strain ATCC 204508 / S288c) GN=RPL26A PE=1 SV=3	RPL26A	Ribosome		14 kDa	1	1	0.06	1	0.17	1
Superoxide dismutase [Cu-Zn] OS=Saccharomyces cerevisiae (strain ATCC 204508 / S288c) GN=SOD1 PE=1 SV=2	SOD1	Diverse function: Aging?	Hannich JT, et al. (2005) PMID:15590687	16 kDa	0.1	1		0.99	1	1
Cluster of 60S ribosomal protein L17-A OS=Saccharomyces cerevisiae (strain ATCC 204508 / S288c) GN=RPL17A PE=1 SV=4 (P05740)	RPL17A	Ribosome	Chymkowitch, et al. (2012) PNAS	21 kDa	1	1		0.99		1
Elongation factor 1-alpha OS=Saccharomyces cerevisiae (strain ATCC 204508 / S288c) GN=TEF1 PE=1 SV=1	TEF1	Translation	Chymkowitch, et al. (2012) PNAS	50 kDa	1	1		1		0.97
Cluster of Pyruvate kinase 1 OS=Saccharomyces cerevisiae (strain ATCC 204508 / S288c) GN=CDC19 PE=1 SV=2 (P00549)	CDC19	Energy metabolism	Hannich JT, et al. (2005) PMID:15590687	55 kDa	1	1		1	0.22	0.9
Zinc finger protein GIS2 OS=Saccharomyces cerevisiae (strain ATCC 204508 / S288c) GN=GIS2 PE=1 SV=1	GIS2	Translation		17 kDa	1	1	0.27	0.99		0.86
40S ribosomal protein S5 OS=Saccharomyces cerevisiae (strain ATCC 204508 / S288c) GN=RPS5 PE=1 SV=3	RPS5	Ribosome	Hannich JT, et al. (2005) PMID:15590687	25 kDa	1			0.54		0.72
Cluster of Glyceraldehyde-3-phosphate dehydrogenase 2 OS=Saccharomyces cerevisiae (strain ATCC 204508 / S288c) GN=TDH2 PE=1 SV=3 (P00358)	TDH2	Energy metabolism	Chymkowitch, et al. (2012) PNAS	36 kDa	1	0.99		1	1	0.62
Resistance to glucose repression protein 1 OS=Saccharomyces cerevisiae (strain ATCC 204508 / S288c) GN=REG1 PE=1 SV=1	REG1	Energy metabolism		113 kDa	1					0.58
Histone promoter control protein 2 OS=Saccharomyces cerevisiae (strain ATCC 204508 / S288c) GN=HPC2 PE=1 SV=2	HPC2	Transcription	Hannich JT, et al. (2005) PMID:15590687	68 kDa		1	0.88			0.55
Histone H4 OS=Saccharomyces cerevisiae (strain ATCC 204508 / S288c) GN=HHF1 PE=1 SV=2	HHF1	Transcription	Chymkowitch, et al. (2012) PNAS	11 kDa	1			0.99		0.52
DNA-directed RNA polymerase I subunit RPA34 OS=Saccharomyces cerevisiae (strain ATCC 204508 / S288c) GN=RPA34 PE=1 SV=1	RPA34	Transcription	Chymkowitch, et al. (2012) PNAS	27 kDa	1	1	1	1	1	0.51
40S ribosomal protein S15 OS=Saccharomyces cerevisiae (strain ATCC 204508 / S288c) GN=RPS15 PE=1 SV=1	RPS15	Ribosome	Chymkowitch, et al. (2012) PNAS	16 kDa	1	1		0.33		0.4
ATP-dependent DNA helicase RRM3 OS=Saccharomyces cerevisiae (strain ATCC 204508 / S288c) GN=RRM3 PE=1 SV=1	RRM3	DNA helicase	James A, et al. (2014) JBC	82 kDa	1	1		0.99		0.25
Nucleolar protein NET1 OS=Saccharomyces cerevisiae (strain ATCC 204508 / S288c) GN=NET1 PE=1 SV=1	NET1	Silencing	Chymkowitch, et al. (2012) PNAS	129 kDa		1	1	1	1	0.23
Glyceraldehyde-3-phosphate dehydrogenase 1 OS=Saccharomyces cerevisiae (strain ATCC 204508 / S288c) GN=TDH1 PE=1 SV=3	TDH1	Energy metabolism	Chymkowitch, et al. (2012) PNAS	36 kDa	0.61	0.33		1	0.3	0.13
60S ribosomal protein L29 OS=Saccharomyces cerevisiae (strain ATCC 204508 / S288c) GN=RPL29 PE=1 SV=3	RPL29	Ribosome	Hannich JT, et al. (2005) PMID:15590687	7 kDa	1			1		0.07
40S ribosomal protein S30-A OS=Saccharomyces cerevisiae (strain ATCC 204508 / S288c) GN=RPS30A PE=1 SV=1	RPS30A	Ribosome	Sung MK, et al. (2013) PMID:23403034	7 kDa	1	0.99		0.12	0.14	0.06
Protein HBT1 OS=Saccharomyces cerevisiae (strain ATCC 204508 / S288c) GN=HBT1 PE=1 SV=1	HBT1	Morphogenesis	Chymkowitch, et al. (2012) PNAS	114 kDa	1	1		1	0.07
Cluster of Enolase 2 OS=Saccharomyces cerevisiae (strain ATCC 204508 / S288c) GN=ENO2 PE=1 SV=2 (P00925)	ENO2	Energy metabolism	Hannich JT, et al. (2005) PMID:15590687	47 kDa	1	1		1	0.59
Phosphoglycerate kinase OS=Saccharomyces cerevisiae (strain ATCC 204508 / S288c) GN=PGK1 PE=1 SV=2	PGK1	Energy metabolism	Hannich JT, et al. (2005) PMID:15590687	45 kDa	1	0.85		1
Alcohol dehydrogenase 1 OS=Saccharomyces cerevisiae (strain ATCC 204508 / S288c) GN=ADH1 PE=1 SV=5	ADH1	Fermentation	Hannich JT, et al. (2005) PMID:15590687	37 kDa	1	0.77		1
Serine/threonine-protein kinase KSP1 OS=Saccharomyces cerevisiae (strain ATCC 204508 / S288c) GN=KSP1 PE=1 SV=1	KSP1	TOR signaling	Chymkowitch, et al. (2012) PNAS	117 kDa	1			1
Pyruvate decarboxylase isozyme 1 OS=Saccharomyces cerevisiae (strain ATCC 204508 / S288c) GN=PDC1 PE=1 SV=7	PDC1	Energy metabolism	Hannich JT, et al. (2005) PMID:15590687	61 kDa	1	0.99		0.99
Uncharacterized protein YGR130C OS=Saccharomyces cerevisiae (strain ATCC 204508 / S288c) GN=YGR130C PE=1 SV=1	YGR130C	Unknown	James A, et al. (2014) JBC	93 kDa	1			0.85	0.92
Histone H2B.1 OS=Saccharomyces cerevisiae (strain ATCC 204508 / S288c) GN=HTB1 PE=1 SV=2	HTB1	Transcription	James A, et al. (2014) JBC	14 kDa	0.56	1	0.29	0.83	0.95
60S ribosomal protein L16-B OS=Saccharomyces cerevisiae (strain ATCC 204508 / S288c) GN=RPL16B PE=1 SV=3	RPL16B	Ribosome	Chymkowitch, et al. (2012) PNAS	22 kDa	1			0.55
SUMO-conjugating enzyme UBC9 OS=Saccharomyces cerevisiae (strain ATCC 204508 / S288c) GN=UBC9 PE=1 SV=1	UBC9	SUMO	Uetz P, et al. (2000) PMID:10688190	18 kDa		1	1	0.21	0.9
Cluster of 40S ribosomal protein S26-A OS=Saccharomyces cerevisiae (strain ATCC 204508 / S288c) GN=RPS26A PE=1 SV=1 (P39938)	RPS26A	Ribosome	James A, et al. (2014) JBC	14 kDa	1	1		0.14
Phosphoglycerate mutase 1 OS=Saccharomyces cerevisiae (strain ATCC 204508 / S288c) GN=GPM1 PE=1 SV=3	GPM1	Energy metabolism	Hannich JT, et al. (2005) PMID:15590687	28 kDa	1			0.05
Suppressor of mar1-1 protein OS=Saccharomyces cerevisiae (strain ATCC 204508 / S288c) GN=SUM1 PE=1 SV=2	SUM1	Transcription	Chymkowitch, et al. (2012) PNAS	118 kDa		1	0.69		1
Protease B inhibitor 2 OS=Saccharomyces cerevisiae (strain ATCC 204508 / S288c) GN=PBI2 PE=1 SV=1	PBI2	Vacuole fusion	Hannich JT, et al. (2005) PMID:15590687	9 kDa	0.32	1
Vacuolar protein sorting-associated protein 72 OS=Saccharomyces cerevisiae (strain ATCC 204508 / S288c) GN=VPS72 PE=1 SV=2	VPS72	Chromatin remodeling	Chymkowitch, et al. (2012) PNAS	91 kDa		1
Protein SPP41 OS=Saccharomyces cerevisiae (strain ATCC 204508 / S288c) GN=SPP41 PE=1 SV=2	SPP41	Unknown	Chymkowitch, et al. (2012) PNAS	162 kDa		1
Seventh homolog of septin 1 OS=Saccharomyces cerevisiae (strain ATCC 204508 / S288c) GN=SHS1 PE=1 SV=1	SHS1	Cell division	Hannich JT, et al. (2005) PMID:15590687	63 kDa		1
Protein STB3 OS=Saccharomyces cerevisiae (strain ATCC 204508 / S288c) GN=STB3 PE=1 SV=1	STB3	Transcription	Hannich JT, et al. (2005) PMID:15590687	56 kDa		1
ARS-binding factor 1 OS=Saccharomyces cerevisiae (strain ATCC 204508 / S288c) GN=ABF1 PE=1 SV=4	ABF1	Transcription	Hannich JT, et al. (2005) PMID:15590687	82 kDa		1
Cell division control protein 3 OS=Saccharomyces cerevisiae (strain ATCC 204508 / S288c) GN=CDC3 PE=1 SV=3	CDC3	Cell division	Johnson ES and Blobel G (1999) PMID:10579719	60 kDa		1
Cluster of 60S ribosomal protein L31-A OS=Saccharomyces cerevisiae (strain ATCC 204508 / S288c) GN=RPL31A PE=1 SV=1 (P0C2H8)	RPL31A	Ribosome	James A, et al. (2014) JBC	13 kDa	1	0.78
40S ribosomal protein S28-B OS=Saccharomyces cerevisiae (strain ATCC 204508 / S288c) GN=RPS28B PE=1 SV=1	RPS28B	Ribosome	Sung MK, et al. (2013) PMID:23403034	8 kDa	1	0.77
60S ribosomal protein L42-A OS=Saccharomyces cerevisiae (strain ATCC 204508 / S288c) GN=RPL42A PE=1 SV=1	RPL42A	Ribosome	Sung MK, et al. (2013) PMID:23403034	12 kDa	1	0.28
40S ribosomal protein S6-A OS=Saccharomyces cerevisiae (strain ATCC 204508 / S288c) GN=RPS6A PE=1 SV=1	RPS6A	Ribosome	Sung MK, et al. (2013) PMID:23403034	27 kDa	1				0.21
Meiotic sister chromatid recombination protein 1 OS=Saccharomyces cerevisiae (strain ATCC 204508 / S288c) GN=MSC1 PE=1 SV=1	MSC1	Unknown		60 kDa	1				0.52
Elongation factor 2 OS=Saccharomyces cerevisiae (strain ATCC 204508 / S288c) GN=EFT1 PE=1 SV=1	EFT1	Translation	Sung MK, et al. (2013) PMID:23403034	93 kDa	1
